# Supplementary material for: A novel ARMC5-containing ubiquitin ligase controls the degradation of HSPA1A and its client protein estrogen receptor alpha
Source: Research Square preprint supplement (doi:10.21203/rs.3.rs-8810312/v1), 2026-02-22
Supplement: Supplementary file 1 [file 0f50b3bfdbe8ef98e5ae4e3c.xlsx]

## Sheet: E2_vs_NE_edgeR_log2CPM_dedupLib
S-Table 7. EREs with significantly different peak density (p<0.05 and FC>2) in ERa ChIP-seq of ARMC5-overexpressing MCF7 cells in the presence of E2 versus vehicle
V4	V1	V2	V3	Gene Symbol	log2FC	p-value	FDR	Annotation
region_13589	19	1513346	1513361	ADAMTSL5	2.91948	0.000105821	0.198415	Promoter (<=1kb)
region_406	1	37793487	37793502	MANEAL	3.01458	0.000316991	0.297179	Promoter (<=1kb)
region_13588	19	1513226	1513241	ADAMTSL5	2.98865	0.000490389	0.306493	Promoter (<=1kb)
region_5486	6	57106453	57106468	ZNF451	5.23871	0.00334647	0.751679	3' UTR
region_13043	17	67908903	67908918	BPTF	5.20418	0.00425692	0.751679	Intron (ENST00000306378.11/2186, intron 9 of 27)
region_3211	3	133038528	133038543	TMEM108	5.18725	0.0043582	0.751679	Promoter (<=1kb)
region_2632	3	9682877	9682892	CPNE9	-5.17281	0.0047259	0.751679	Intron (ENST00000353332.9/64419, intron 9 of 17)
region_1357	1	247104516	247104531	FLJ39095	-2.39361	0.0060083	0.751679	Promoter (<=1kb)
region_11590	15	52141106	52141121	BCL2L10	-5.07434	0.00775341	0.751679	Intron (ENST00000261837.12/10681, intron 7 of 12)
region_3503	3	193879667	193879682	LINC02038	2.80071	0.00850355	0.751679	Intron (ENST00000804627.1/ENST00000804627.1, intron 1 of 3)
region_1792	2	83836651	83836666	LINC01809	3.53896	0.00866462	0.751679	Distal Intergenic
region_8096	9	113764252	113764267	ZNF618	-5.01121	0.00882262	0.751679	Distal Intergenic
region_13791	19	18407106	18407121	LRRC25	-4.97138	0.00923201	0.751679	Distal Intergenic
region_974	1	178725938	178725953	RALGPS2-AS1	1.96901	0.0105678	0.751679	Promoter (<=1kb)
region_10999	14	32127066	32127081	ARHGAP5-AS1	-4.91074	0.0119138	0.751679	Intron (ENST00000556611.5/394, intron 3 of 6)
region_14483	20	56787014	56787029	TFAP2C	4.92862	0.0124007	0.751679	Intron (ENST00000807007.1/ENST00000807007.1, intron 2 of 2)
region_7426	8	121432537	121432552	HAS2-AS1	-4.91254	0.0125878	0.751679	Intron (ENST00000784704.1/ENST00000784704.1, intron 3 of 4)
region_14038	19	49072756	49072771	KCNA7	4.88249	0.0125974	0.751679	Promoter (<=1kb)
region_12154	16	29175700	29175715	SNX29P2	-3.45855	0.0128819	0.751679	Exon (ENST00000771108.1/ENST00000771108.1, exon 2 of 2)
region_13029	17	67013738	67013753	CACNG1	4.91847	0.0130957	0.751679	Intron (ENST00000262138.4/27092, intron 1 of 3)
region_2915	3	61697065	61697080	PTPRG	-4.90283	0.0132029	0.751679	Intron (ENST00000495879.1/5793, intron 1 of 2)
region_4541	5	53089431	53089446	MOCS2-DT	-2.47735	0.0144339	0.751679	Exon (ENST00000606157.1/ENST00000606157.1, exon 1 of 1)
region_11713	15	70844025	70844040	LRRC49	3.40678	0.0159641	0.751679	Intron (ENST00000299213.10/55323, intron 1 of 2)
region_13272	18	23455140	23455155	RIOK3	-3.3604	0.0170605	0.751679	Promoter (1-2kb)
region_14656	21	32437093	32437108	EVA1C	4.79345	0.0179011	0.751679	Intron (ENST00000469079.5/59271, intron 1 of 3)
region_9034	10	129818856	129818871	MIR4297	-4.73814	0.0198985	0.751679	Distal Intergenic
region_5987	7	1193354	1193369	ZFAND2A-DT	4.77134	0.0213786	0.751679	Distal Intergenic
region_2319	2	196053637	196053652	DNAH7	-4.7393	0.0224564	0.751679	Intron (ENST00000312428.11/56171, intron 2 of 64)
region_10075	12	56016665	56016680	IKZF4	4.72069	0.0237285	0.751679	Intron (ENST00000262032.9/64375, intron 2 of 11)
region_10508	13	19191484	19191499	LOC101928697	4.72069	0.0237285	0.751679	Distal Intergenic
region_12613	17	9054370	9054385	NTN1	-4.73052	0.0248908	0.751679	Intron (ENST00000173229.7/9423, intron 2 of 6)
region_12318	16	66836518	66836533	CA7	-4.63967	0.025086	0.751679	Intron (ENST00000561579.6/8883, intron 1 of 8)
region_752	1	114503411	114503426	TRIM33	3.18186	0.0278623	0.751679	Intron (ENST00000358465.7/51592, intron 1 of 19)
region_10434	12	124871608	124871623	SCARB1	-4.59942	0.0291104	0.751679	Intron (ENST00000535005.5/949, intron 1 of 12)
region_4208	4	161018888	161018903	LOC105377515	-4.60355	0.0304651	0.751679	Distal Intergenic
region_8517	10	34932126	34932141	LINC02635	-4.60355	0.0304651	0.751679	Distal Intergenic
region_830	1	150992482	150992497	LOC105371438	3.14533	0.0306439	0.751679	Intron (ENST00000368947.9/8416, intron 12 of 13)
region_6674	7	123658080	123658095	LMOD2	-3.19097	0.0308264	0.751679	Promoter (2-3kb)
region_11892	15	101611863	101611878	LINC02348	-4.61717	0.0309221	0.751679	Intron (ENST00000655738.1/101927505, intron 2 of 2)
region_2694	3	18861575	18861590	LOC107986066	-4.61216	0.0314877	0.751679	Intron (ENST00000626982.2/101927777, intron 4 of 4)
region_8407	10	15248704	15248719	LOC105376433	-4.60716	0.0320967	0.751679	Exon (ENST00000378116.9/221061, exon 5 of 8)
region_7956	9	89560736	89560751	LOC105376139	4.59804	0.0322632	0.751679	Distal Intergenic
region_14006	19	47035114	47035129	TMEM160	4.59372	0.0325602	0.751679	Intron (ENST00000602212.6/4861, intron 5 of 11)
region_4813	5	124204039	124204054	LOC105379155	4.55359	0.0338153	0.751679	Intron (ENST00000750063.1/101927397, intron 2 of 7)
region_8294	9	137001003	137001018	CLIC3	2.07257	0.0338299	0.751679	Distal Intergenic
region_13044	17	67934805	67934820	C17orf58	-2.10774	0.0338653	0.751679	Exon (ENST00000804699.1/ENST00000804699.1, exon 2 of 3)
region_5316	6	28452283	28452298	ZSCAN23	-4.52774	0.0355949	0.751679	Intron (ENST00000721467.1/124901294, intron 1 of 1)
region_11715	15	71104874	71104889	THSD4	1.74715	0.0370077	0.751679	Intron (ENST00000796204.1/ENST00000796204.1, intron 1 of 1)
region_2467	2	225737848	225737863	LOC105373914	-4.55444	0.0371582	0.751679	Intron (ENST00000762654.1/105373914, intron 2 of 2)
region_1167	1	217806340	217806355	SPATA17-AS1	-4.54953	0.0377838	0.751679	Intron (ENST00000366933.5/128153, intron 9 of 10)
region_6538	7	97152718	97152733	SDHAF3	-4.54953	0.0377838	0.751679	Intron (ENST00000432641.3/57001, intron 1 of 1)
region_1518	2	26923729	26923744	MAPRE3	-4.54462	0.0384775	0.751679	Intron (ENST00000450961.5/56896, intron 2 of 3)
region_4492	5	36732427	36732442	SLC1A3-AS1	4.51073	0.038774	0.751679	Distal Intergenic
region_973	1	178655719	178655734	MIR4424	1.81948	0.0393179	0.751679	Distal Intergenic
region_4021	4	107131172	107131187	LOC102725220	-4.55152	0.0407332	0.751679	Intron (ENST00000513208.5/27123, intron 2 of 4)
region_1929	2	112753596	112753611	CKAP2L	4.51066	0.0417051	0.751679	Intron (ENST00000302450.11/150468, intron 4 of 8)
region_6691	7	128306170	128306185	RBM28	-4.45647	0.04289	0.751679	3' UTR
region_11001	14	32504349	32504364	LOC124903298	-4.47564	0.0432087	0.751679	Intron (ENST00000280979.9/9472, intron 2 of 13)
region_3259	3	141402259	141402274	LOC124906291	1.70432	0.0435903	0.751679	Intron (ENST00000509842.5/253461, intron 6 of 7)
region_6005	7	2539659	2539674	MIR4648	1.79242	0.0437287	0.751679	Exon (ENST00000493232.5/221927, exon 2 of 3)
region_3030	3	90245676	90245691	LOC124906381	-4.47051	0.043994	0.751679	Intron (ENST00000474651.1/ENST00000474651.1, intron 2 of 13)
region_2135	2	152254688	152254703	STAM2	-4.48267	0.045835	0.751679	Intron (ENST00000804440.1/105373689, intron 3 of 3)
region_5289	6	23115531	23115546	LOC105374974	-4.48267	0.045835	0.751679	Intron (ENST00000797408.1/105374974, intron 2 of 3)
region_6207	7	44834853	44834868	H2AZ2	-4.48267	0.045835	0.751679	Intron (ENST00000222690.10/94239, intron 4 of 4)
region_1513	2	25422474	25422489	DTNB-AS1	4.44483	0.0458674	0.751679	Intron (ENST00000780548.1/101929272, intron 1 of 1)
region_5255	6	17843978	17843993	LOC105374953	4.44483	0.0458674	0.751679	Intron (ENST00000378814.9/63971, intron 9 of 37)
region_14470	20	54256643	54256658	PFDN4	-1.79452	0.0461062	0.751679	Intron (ENST00000650710.1/ENST00000650710.1, intron 1 of 2)
region_5981	7	331062	331077	LOC105375118	-3.02958	0.0474854	0.751679	Promoter (2-3kb)
region_3233	3	136733153	136733168	STAG1	4.4293	0.0479074	0.751679	Intron (ENST00000236698.9/10274, intron 1 of 32)
region_823	1	150359453	150359468	RPRD2	2.55595	0.0483301	0.751679	Distal Intergenic
region_12339	16	70136811	70136826	PDPR	1.36433	0.0486531	0.751679	Intron (ENST00000288050.9/55066, intron 10 of 18)
region_12684	17	17783307	17783322	LOC124903942	1.4672	0.0497958	0.751679	Promoter (<=1kb)
