# Supplementary material for: A novel ARMC5-containing ubiquitin ligase controls the degradation of HSPA1A and its client protein estrogen receptor alpha
Source: Research Square preprint supplement (doi:10.21203/rs.3.rs-8810312/v1), 2026-02-22
Supplement: Supplementary file 2 [file 1301cfd258d1f8e1f5e3962e.xlsx]

## Sheet: S-Table 3. Differentially expre
S-Table 3. Differentially expressed genes (FC>2 and FDR<0.05) in MCF7 cells overexpressing ARMC5 and treated with E2 vs vehicle according to RNA-seq
ENTREZID	ENSEMBL	GENE SYMBOL	GENE NAME	Log2FC	log2(CPM)	F	p-value	FDR
11098	ENSG00000150687	PRSS23	serine protease 23	1.58661	5.668	731.122	1.35e-09	3.99e-06
1836	ENSG00000155850	SLC26A2	solute carrier family 26 member 2	2.08118	6.49683	972.97	4.02e-10	3.99e-06
26353	ENSG00000152137	HSPB8	heat shock protein family B (small) member 8	1.66984	7.48882	741.364	1.28e-09	3.99e-06
6297	ENSG00000165821	SALL2	spalt like transcription factor 2	-2.54347	4.79247	859.625	6.81e-10	3.99e-06
861	ENSG00000159216	RUNX1	RUNX family transcription factor 1	1.66086	6.04549	774.569	1.06e-09	3.99e-06
8645	ENSG00000164626	KCNK5	potassium two pore domain channel subfamily K member 5	2.66308	3.91283	797.857	9.34e-10	3.99e-06
22822	ENSG00000139289	PHLDA1	pleckstrin homology like domain family A member 1	1.63238	6.4411	623.558	2.65e-09	4.7e-06
283578	ENSG00000100580	TMED8	transmembrane p24 trafficking protein family member 8	1.29473	7.1645	665.198	2.02e-09	4.7e-06
6584	ENSG00000197375	SLC22A5	solute carrier family 22 member 5	1.43727	5.73411	624.576	2.64e-09	4.7e-06
7039	ENSG00000163235	TGFA	transforming growth factor alpha	2.16236	3.78289	630.206	2.54e-09	4.7e-06
4886	ENSG00000164128	NPY1R	neuropeptide Y receptor Y1	1.62862	7.25831	605.647	3e-09	4.83e-06
23223	ENSG00000052749	RRP12	ribosomal RNA processing 12 homolog	1.30649	6.05166	588.114	3.4e-09	5.02e-06
94241	ENSG00000164938	TP53INP1	tumor protein p53 inducible nuclear protein 1	-1.2503	6.60035	568.874	3.91e-09	5.33e-06
23670	ENSG00000135048	CEMIP2	cell migration inducing hyaluronidase 2	1.34596	6.88642	495.25	7.03e-09	6.06e-06
24147	ENSG00000179431	FJX1	four-jointed box kinase 1	1.67506	4.60775	511.146	6.15e-09	6.06e-06
342184	ENSG00000248905	FMN1	formin 1	1.75917	4.53812	492.638	7.18e-09	6.06e-06
3754	ENSG00000162975	KCNF1	potassium voltage-gated channel modifier subfamily F member 1	2.69159	2.99462	530.899	5.24e-09	6.06e-06
6840	ENSG00000197321	SVIL	supervillin	1.08951	7.55588	502.947	6.58e-09	6.06e-06
771	ENSG00000074410	CA12	carbonic anhydrase 12	1.30384	8.95744	521.788	5.64e-09	6.06e-06
79929	ENSG00000180834	MAP6D1	MAP6 domain containing 1	1.66897	4.80003	494.301	7.08e-09	6.06e-06
9687	ENSG00000196208	GREB1	growth regulating estrogen receptor binding 1	1.3797	8.94701	495.346	7.02e-09	6.06e-06
25976	ENSG00000163659	TIPARP	TCDD inducible poly(ADP-ribose) polymerase	1.49162	5.58355	439.352	1.16e-08	9.36e-06
2274	ENSG00000115641	FHL2	four and a half LIM domains 2	2.1602	3.66158	430.949	1.26e-08	9.72e-06
7074	ENSG00000156299	TIAM1	TIAM Rac1 associated GEF 1	1.544	4.72674	418.74	1.42e-08	1.05e-05
25929	ENSG00000082516	GEMIN5	gem nuclear organelle associated protein 5	1.12266	6.32613	404.853	1.64e-08	1.13e-05
55672	ENSG00000219481	NBPF1	NBPF member 1	1.24912	5.35189	403.615	1.66e-08	1.13e-05
23286	ENSG00000113645	WWC1	WW and C2 domain containing 1	1.17017	6.97106	388.25	1.96e-08	1.17e-05
57493	ENSG00000173706	HEG1	heart development protein with EGF like domains 1	3.19526	3.63973	392.527	1.87e-08	1.17e-05
8000	ENSG00000167653	PSCA	prostate stem cell antigen	-2.27324	3.25236	394.167	1.84e-08	1.17e-05
94122	ENSG00000147041	SYTL5	synaptotagmin like 5	1.46381	4.41837	387.315	1.98e-08	1.17e-05
9619	ENSG00000160179	ABCG1	ATP binding cassette subfamily G member 1	-1.05936	6.51214	371.48	2.36e-08	1.35e-05
10885	ENSG00000065183	WDR3	WD repeat domain 3	1.28221	6.41396	354.474	2.87e-08	1.59e-05
5241	ENSG00000082175	PGR	progesterone receptor	2.49977	4.79626	348.102	3.09e-08	1.66e-05
9181	ENSG00000116584	ARHGEF2	Rho/Rac guanine nucleotide exchange factor 2	-1.12868	5.65246	345.183	3.2e-08	1.67e-05
113230	ENSG00000141854	MISP3	MISP family member 3	-1.36801	4.86665	338.293	3.49e-08	1.67e-05
257364	ENSG00000173548	SNX33	sorting nexin 33	-1.1717	4.78541	338.118	3.49e-08	1.67e-05
90427	ENSG00000104081	BMF	Bcl2 modifying factor	-1.2968	4.62201	342.527	3.31e-08	1.67e-05
23657	ENSG00000151012	SLC7A11	solute carrier family 7 member 11	1.58213	4.65625	330.818	3.83e-08	1.74e-05
80324	ENSG00000177192	PUS1	pseudouridine synthase 1	1.3158	5.80637	327.079	4.02e-08	1.74e-05
860	ENSG00000124813	RUNX2	RUNX family transcription factor 2	1.40134	4.33466	326.954	4.02e-08	1.74e-05
220992	ENSG00000198298	ZNF485	zinc finger protein 485	1.48361	3.80452	322.285	4.27e-08	1.8e-05
55809	ENSG00000124496	TRERF1	transcriptional regulating factor 1	-1.6421	5.95144	319.366	4.44e-08	1.83e-05
4773	ENSG00000101096	NFATC2	nuclear factor of activated T cells 2	1.09646	5.86522	309.413	5.06e-08	1.84e-05
55565	ENSG00000102984	ZNF821	zinc finger protein 821	-1.53641	4.3874	309.19	5.08e-08	1.84e-05
9203	ENSG00000147130	ZMYM3	zinc finger MYM-type containing 3	-1.14439	5.57106	311.768	4.91e-08	1.84e-05
9846	ENSG00000033327	GAB2	GRB2 associated binding protein 2	1.04653	5.68017	314.752	4.72e-08	1.84e-05
27202	ENSG00000134830	C5AR2	complement C5a receptor 2	1.44039	3.71963	305.991	5.31e-08	1.84e-05
164832	ENSG00000170500	LONRF2	LON peptidase N-terminal domain and ring finger 2	1.31167	6.67931	299.955	5.77e-08	1.86e-05
4603	ENSG00000185697	MYBL1	MYB proto-oncogene like 1	2.48293	6.32073	317.244	5.98e-08	1.89e-05
23007	ENSG00000114805	PLCH1	phospholipase C eta 1	-1.25985	4.40661	294.515	6.22e-08	1.92e-05
51559	ENSG00000111696	NT5DC3	5'-nucleotidase domain containing 3	1.68062	3.89661	293.202	6.34e-08	1.92e-05
5979	ENSG00000165731	RET	ret proto-oncogene	1.68763	6.59045	292.544	6.4e-08	1.92e-05
2296	ENSG00000054598	FOXC1	forkhead box C1	2.12312	4.85174	290.212	6.62e-08	1.95e-05
2669	ENSG00000164949	GEM	GTP binding protein overexpressed in skeletal muscle	1.94152	3.19456	287.576	6.88e-08	2e-05
3487	ENSG00000141753	IGFBP4	insulin like growth factor binding protein 4	1.12366	8.03214	282.603	7.39e-08	2.02e-05
7464	ENSG00000106789	CORO2A	coronin 2A	-1.26058	4.83614	283.457	7.3e-08	2.02e-05
9886	ENSG00000072422	RHOBTB1	Rho related BTB domain containing 1	1.55846	5.40539	281.368	7.53e-08	2.02e-05
1802	ENSG00000132768	DPH2	diphthamide biosynthesis 2	1.03419	5.15306	276.105	8.15e-08	2.15e-05
9188	ENSG00000165732	DDX21	DExD-box helicase 21	1.0681	8.42916	273.77	8.44e-08	2.17e-05
115708	ENSG00000166166	TRMT61A	tRNA methyltransferase 61A	1.01525	5.32622	271.584	8.73e-08	2.18e-05
9569	ENSG00000006704	GTF2IRD1	GTF2I repeat domain containing 1	-1.76279	5.28114	272.17	8.65e-08	2.18e-05
80746	ENSG00000154743	TSEN2	tRNA splicing endonuclease subunit 2	1.15679	4.98504	267.976	9.23e-08	2.27e-05
254778	ENSG00000169085	VXN	vexin	3.05312	3.31653	265.184	9.64e-08	2.3e-05
2626	ENSG00000136574	GATA4	GATA binding protein 4	3.86567	0.615914	263.518	9.89e-08	2.3e-05
7057	ENSG00000137801	THBS1	thrombospondin 1	1.07497	8.05028	264.531	9.74e-08	2.3e-05
794	ENSG00000172137	CALB2	calbindin 2	3.09235	1.03234	262.927	9.99e-08	2.3e-05
157285	ENSG00000275342	PRAG1	PEAK1 related, kinase-activating pseudokinase 1	1.14572	5.89015	258.715	1.07e-07	2.42e-05
221662	ENSG00000112183	RBM24	RNA binding motif protein 24	2.35305	4.31058	257.508	1.09e-07	2.44e-05
9645	ENSG00000133816	MICAL2	microtubule associated monooxygenase, calponin and LIM domain containing 2	1.08149	4.54117	255.899	1.12e-07	2.47e-05
51317	ENSG00000135365	PHF21A	PHD finger protein 21A	-1.35871	5.04135	254.708	1.14e-07	2.49e-05
705	ENSG00000112578	BYSL	bystin like	1.02496	5.63075	251.36	1.2e-07	2.6e-05
1628	ENSG00000105516	DBP	D-box binding PAR bZIP transcription factor	-1.48188	4.7463	249.07	1.25e-07	2.61e-05
7052	ENSG00000198959	TGM2	transglutaminase 2	3.78095	1.65204	249.614	1.24e-07	2.61e-05
168544	ENSG00000181444	ZNF467	zinc finger protein 467	-1.1976	6.40922	243.931	1.36e-07	2.71e-05
5097	ENSG00000156453	PCDH1	protocadherin 1	-1.45321	4.84665	243.812	1.37e-07	2.71e-05
5465	ENSG00000186951	PPARA	peroxisome proliferator activated receptor alpha	-1.28016	3.87804	241.157	1.43e-07	2.78e-05
6478	ENSG00000181788	SIAH2	siah E3 ubiquitin protein ligase 2	1.4095	7.67535	237.543	1.52e-07	2.87e-05
26287	ENSG00000165887	ANKRD2	ankyrin repeat domain 2	3.60842	0.732512	236.598	1.55e-07	2.89e-05
25865	ENSG00000105287	PRKD2	protein kinase D2	-1.10884	5.95399	234.289	1.61e-07	2.97e-05
3055	ENSG00000101336	HCK	HCK proto-oncogene, Src family tyrosine kinase	3.21822	1.4931	230.931	1.71e-07	3.12e-05
6875	ENSG00000141384	TAF4B	TATA-box binding protein associated factor 4b	1.4867	4.52265	230.344	1.73e-07	3.13e-05
54549	ENSG00000069188	SDK2	sidekick cell adhesion molecule 2	2.20721	3.00048	227.744	1.81e-07	3.2e-05
317	ENSG00000120868	APAF1	apoptotic peptidase activating factor 1	-1.22842	4.53935	224.982	1.91e-07	3.31e-05
29995	ENSG00000071282	LMCD1	LIM and cysteine rich domains 1	1.60546	5.0315	221.982	2.02e-07	3.4e-05
140685	ENSG00000130584	ZBTB46	zinc finger and BTB domain containing 46	-1.16252	4.61508	218.744	2.14e-07	3.45e-05
4143	ENSG00000151224	MAT1A	methionine adenosyltransferase 1A	2.85563	1.92394	218.703	2.14e-07	3.45e-05
63035	ENSG00000085185	BCORL1	BCL6 corepressor like 1	-2.08666	4.6653	220.314	2.08e-07	3.45e-05
56652	ENSG00000107815	TWNK	twinkle mtDNA helicase	1.22401	5.52452	217.359	2.2e-07	3.51e-05
23212	ENSG00000179041	RRS1	ribosome biogenesis regulator 1 homolog	1.46959	6.2459	214.317	2.33e-07	3.64e-05
3860	ENSG00000171401	KRT13	keratin 13	4.17099	0.584661	214.172	2.34e-07	3.64e-05
1591	ENSG00000019186	CYP24A1	cytochrome P450 family 24 subfamily A member 1	3.60696	1.45867	212.13	2.43e-07	3.75e-05
1303	ENSG00000111799	COL12A1	collagen type XII alpha 1 chain	1.4713	6.06715	209.859	2.54e-07	3.77e-05
1736	ENSG00000130826	DKC1	dyskerin pseudouridine synthase 1	1.07635	7.26186	210.422	2.52e-07	3.77e-05
9480	ENSG00000119547	ONECUT2	one cut homeobox 2	1.05356	5.03255	209.637	2.55e-07	3.77e-05
54498	ENSG00000088826	SMOX	spermine oxidase	1.46673	2.84773	203.559	2.88e-07	4.01e-05
11037	ENSG00000243244	STON1	stonin 1	-1.87792	2.54242	197.075	3.3e-07	4.33e-05
56920	ENSG00000010319	SEMA3G	semaphorin 3G	3.52438	1.09631	196.908	3.31e-07	4.33e-05
7067	ENSG00000126351	THRA	thyroid hormone receptor alpha	-1.08466	3.80137	195.465	3.41e-07	4.37e-05
10125	ENSG00000172575	RASGRP1	RAS guanyl releasing protein 1	2.30635	5.72054	205.449	3.5e-07	4.46e-05
158046	ENSG00000130045	NXNL2	nucleoredoxin like 2	1.92242	3.39312	193.106	3.58e-07	4.5e-05
23160	ENSG00000163811	WDR43	WD repeat domain 43	1.01977	7.18397	191.699	3.69e-07	4.57e-05
5174	ENSG00000174827	PDZK1	PDZ domain containing 1	2.48364	2.70773	190.668	3.78e-07	4.64e-05
57523	ENSG00000205978	NYNRIN	NYN domain and retroviral integrase containing	-1.86595	4.1612	188.385	3.97e-07	4.81e-05
165215	ENSG00000144369	FAM171B	family with sequence similarity 171 member B	-1.16835	5.59809	187.692	4.03e-07	4.82e-05
341640	ENSG00000150893	FREM2	FRAS1 related extracellular matrix 2	1.15083	8.31721	187.901	4.01e-07	4.82e-05
85441	ENSG00000130589	HELZ2	helicase with zinc finger 2	-1.14688	8.46041	187.07	4.09e-07	4.85e-05
7450	ENSG00000110799	VWF	von Willebrand factor	2.56489	0.909804	185.008	4.28e-07	4.95e-05
118980	ENSG00000156398	SFXN2	sideroflexin 2	1.74106	5.12193	184.245	4.35e-07	4.97e-05
4609	ENSG00000136997	MYC	MYC proto-oncogene, bHLH transcription factor	1.361	7.31541	182.377	4.53e-07	5.11e-05
92935	ENSG00000247626	MARS2	methionyl-tRNA synthetase 2, mitochondrial	1.00625	5.13165	180.723	4.71e-07	5.13e-05
9933	ENSG00000080608	PUM3	pumilio RNA binding family member 3	1.03591	5.17368	180.276	4.76e-07	5.13e-05
100507584	ENSG00000249346	LINC01016	long intergenic non-protein coding RNA 1016	4.33679	3.32898	192.573	4.87e-07	5.19e-05
262	ENSG00000123505	AMD1	adenosylmethionine decarboxylase 1	1.10448	7.52231	179.053	4.89e-07	5.19e-05
27340	ENSG00000120800	UTP20	UTP20 small subunit processome component	1.18821	5.88128	178.405	4.96e-07	5.23e-05
3707	ENSG00000143772	ITPKB	inositol-trisphosphate 3-kinase B	-1.02485	4.6993	178.056	5e-07	5.24e-05
57539	ENSG00000118965	WDR35	WD repeat domain 35	1.04533	4.59386	176.094	5.24e-07	5.39e-05
57224	ENSG00000135540	NHSL1	NHS like 1	1.23909	5.08198	175.327	5.33e-07	5.4e-05
60437	ENSG00000124215	CDH26	cadherin 26	2.68936	1.8304	175.297	5.34e-07	5.4e-05
79080	ENSG00000110104	CCDC86	coiled-coil domain containing 86	1.16975	5.86783	175.682	5.29e-07	5.4e-05
92979	ENSG00000139266	MARCHF9	membrane associated ring-CH-type finger 9	-1.09286	4.84307	172.892	5.65e-07	5.55e-05
330	ENSG00000023445	BIRC3	baculoviral IAP repeat containing 3	1.70756	3.54679	170.552	5.97e-07	5.59e-05
3717	ENSG00000096968	JAK2	Janus kinase 2	1.59248	5.46344	170.671	5.95e-07	5.59e-05
51760	ENSG00000103528	SYT17	synaptotagmin 17	-1.24147	4.39854	170.889	5.92e-07	5.59e-05
54865	ENSG00000160818	GPATCH4	G-patch domain containing 4 (gene/pseudogene)	1.02125	6.17819	170.939	5.92e-07	5.59e-05
9424	ENSG00000099337	KCNK6	potassium two pore domain channel subfamily K member 6	1.25805	6.04349	171.24	5.87e-07	5.59e-05
90634	ENSG00000139597	N4BP2L1	NEDD4 binding protein 2 like 1	-1.84821	2.1568	169.748	6.09e-07	5.64e-05
59339	ENSG00000169499	PLEKHA2	pleckstrin homology domain containing A2	-1.39699	4.27052	169.276	6.16e-07	5.66e-05
89797	ENSG00000166833	NAV2	neuron navigator 2	2.55327	3.78855	173.25	6.64e-07	6e-05
51491	ENSG00000048162	NOP16	NOP16 nucleolar protein	1.19216	5.69519	165.928	6.68e-07	6.01e-05
10849	ENSG00000117877	POLR1G	RNA polymerase I subunit G	1.36764	3.99182	164.546	6.91e-07	6.01e-05
134	ENSG00000163485	ADORA1	adenosine A1 receptor	1.6637	2.65572	164.662	6.9e-07	6.01e-05
146330	ENSG00000127585	FBXL16	F-box and leucine rich repeat protein 16	-1.12096	5.4555	163.642	7.07e-07	6.01e-05
1545	ENSG00000138061	CYP1B1	cytochrome P450 family 1 subfamily B member 1	1.95847	8.12782	181.846	7.03e-07	6.01e-05
56172	ENSG00000154122	ANKH	ANKH inorganic pyrophosphate transport regulator	1.10823	4.75064	165.453	6.76e-07	6.01e-05
64377	ENSG00000124302	CHST8	carbohydrate sulfotransferase 8	2.97313	0.557769	163.227	7.15e-07	6.03e-05
51313	ENSG00000164125	GASK1B	golgi associated kinase 1B	1.13122	3.33111	162.265	7.32e-07	6.06e-05
64798	ENSG00000155792	DEPTOR	DEP domain containing MTOR interacting protein	1.18738	4.77661	161.311	7.5e-07	6.15e-05
7903	ENSG00000113532	ST8SIA4	ST8 alpha-N-acetyl-neuraminide alpha-2,8-sialyltransferase 4	-1.15116	5.08748	160.319	7.69e-07	6.22e-05
80757	ENSG00000184986	TMEM121	transmembrane protein 121	-1.73524	3.57223	159.78	7.8e-07	6.25e-05
102724515	ENSG00000204792	LINC01291	long intergenic non-protein coding RNA 1291	2.06597	2.89342	159.369	7.88e-07	6.26e-05
8908	ENSG00000056998	GYG2	glycogenin 2	-1.43362	3.86823	157.454	8.28e-07	6.46e-05
64318	ENSG00000173145	NOC3L	NOC3 like DNA replication regulator	1.19445	5.16972	156.752	8.43e-07	6.55e-05
29948	ENSG00000140961	OSGIN1	oxidative stress induced growth inhibitor 1	1.40912	4.6028	155.629	8.68e-07	6.7e-05
57605	ENSG00000090975	PITPNM2	phosphatidylinositol transfer protein membrane associated 2	1.45461	3.68978	155.559	8.7e-07	6.7e-05
19	ENSG00000165029	ABCA1	ATP binding cassette subfamily A member 1	-1.33181	3.30111	155.038	8.82e-07	6.72e-05
9816	ENSG00000135763	URB2	URB2 ribosome biogenesis homolog	1.27108	5.66614	154.353	8.98e-07	6.79e-05
10475	ENSG00000112343	TRIM38	tripartite motif containing 38	-1.10573	4.46584	152.573	9.41e-07	7.09e-05
79605	ENSG00000177614	PGBD5	piggyBac transposable element derived 5	1.89493	2.85969	152.034	9.55e-07	7.17e-05
8140	ENSG00000103257	SLC7A5	solute carrier family 7 member 5	1.07387	10.4499	150.395	9.98e-07	7.36e-05
148545	ENSG00000196427	NBPF4	NBPF member 4	1.71755	2.17094	149.843	1.01e-06	7.44e-05
348926	ENSG00000290374	FAM86EP	family with sequence similarity 86, member A pseudogene	1.10126	3.71312	148.781	1.04e-06	7.59e-05
152485	ENSG00000151612	ZNF827	zinc finger protein 827	-1.30403	3.02714	145.381	1.15e-06	8.05e-05
1543	ENSG00000140465	CYP1A1	cytochrome P450 family 1 subfamily A member 1	2.07277	6.52884	161.999	1.14e-06	8.05e-05
10171	ENSG00000120158	RCL1	RNA terminal phosphate cyclase like 1	1.27447	5.37348	144.205	1.18e-06	8.22e-05
118738	ENSG00000265763	ZNF488	zinc finger protein 488	2.6382	0.849235	143.999	1.19e-06	8.24e-05
222183	ENSG00000177679	SRRM3	serine/arginine repetitive matrix 3	-1.44826	3.84506	143.602	1.2e-06	8.27e-05
2535	ENSG00000180340	FZD2	frizzled class receptor 2	-1.11739	3.64384	143.657	1.2e-06	8.27e-05
2633	ENSG00000117228	GBP1	guanylate binding protein 1	1.37225	3.11619	143.256	1.22e-06	8.29e-05
440465	ENSG00000226137	BAIAP2-DT	BAIAP2 divergent transcript	-1.31068	4.20587	141.847	1.27e-06	8.4e-05
84365	ENSG00000155438	NIFK	nucleolar protein interacting with the FHA domain of MKI67	1.06663	5.76582	141.503	1.28e-06	8.45e-05
3760	ENSG00000162989	KCNJ3	potassium inwardly rectifying channel subfamily J member 3	-1.14582	5.43762	140.439	1.32e-06	8.62e-05
2886	ENSG00000141738	GRB7	growth factor receptor bound protein 7	-1.49187	3.70612	140.079	1.33e-06	8.68e-05
1662	ENSG00000178105	DDX10	DEAD-box helicase 10	1.43586	4.95163	139.609	1.35e-06	8.76e-05
113791	ENSG00000100100	PIK3IP1	phosphoinositide-3-kinase interacting protein 1	-1.00238	4.34958	138.371	1.4e-06	8.93e-05
155185	ENSG00000174945	AMZ1	archaelysin family metallopeptidase 1	1.17364	4.98619	137.886	1.42e-06	9.02e-05
55199	ENSG00000158483	FAM86C1P	family with sequence similarity 86 member C1, pseudogene	1.13449	4.08608	137.242	1.45e-06	9.04e-05
7100	ENSG00000187554	TLR5	toll like receptor 5	1.60205	2.47457	137.058	1.46e-06	9.04e-05
27124	ENSG00000185133	INPP5J	inositol polyphosphate-5-phosphatase J	-1.08856	3.823	135.976	1.5e-06	9.12e-05
9076	ENSG00000163347	CLDN1	claudin 1	1.56365	3.20019	133.561	1.62e-06	9.5e-05
72	ENSG00000163017	ACTG2	actin gamma 2, smooth muscle	1.27175	3.24508	132.381	1.68e-06	9.69e-05
83732	ENSG00000124784	RIOK1	RIO kinase 1	1.08895	4.99229	132.203	1.69e-06	9.69e-05
4234	ENSG00000037897	METTL1	methyltransferase 1, tRNA methylguanosine	1.50365	4.99853	131.367	1.73e-06	9.84e-05
11248	ENSG00000182575	NXPH3	neurexophilin 3	2.1735	2.46949	129.945	1.81e-06	0.000101551
9543	ENSG00000174498	IGDCC3	immunoglobulin superfamily DCC subclass member 3	-1.13029	4.16049	129.481	1.83e-06	0.000101739
5581	ENSG00000171132	PRKCE	protein kinase C epsilon	1.04569	5.19811	127.614	1.94e-06	0.00010527
11278	ENSG00000118922	KLF12	KLF transcription factor 12	-1.17674	3.14867	126.848	1.99e-06	0.000105896
27295	ENSG00000154553	PDLIM3	PDZ and LIM domain 3	2.76868	-0.171947	125.67	2.07e-06	0.000108335
389332	ENSG00000271824	SMIM32	small integral membrane protein 32	3.54425	-0.519931	125.736	2.06e-06	0.000108335
29914	ENSG00000120942	UBIAD1	UbiA prenyltransferase domain containing 1	1.20458	4.69144	125.266	2.1e-06	0.00010943
1906	ENSG00000078401	EDN1	endothelin 1	1.1579	3.21043	124.408	2.15e-06	0.000110868
79633	ENSG00000196159	FAT4	FAT atypical cadherin 4	1.58466	3.29203	124.088	2.18e-06	0.00011138
3128	ENSG00000290878	HLA-DRB6	major histocompatibility complex, class II, DR beta 6 (pseudogene)	2.30181	1.87794	123.711	2.2e-06	0.000112431
114770	ENSG00000161031	PGLYRP2	peptidoglycan recognition protein 2	4.44034	-1.11555	123.112	2.25e-06	0.000113668
3756	ENSG00000143473	KCNH1	potassium voltage-gated channel subfamily H member 1	2.45505	1.97121	122.683	2.28e-06	0.000114299
4099	ENSG00000105695	MAG	myelin associated glycoprotein	2.91544	-0.347577	121.376	2.38e-06	0.0001182
79896	ENSG00000185875	THNSL1	threonine synthase like 1	1.19668	5.85031	120.611	2.44e-06	0.000119017
85004	ENSG00000134533	RERG	RAS like estrogen regulated growth inhibitor	1.52184	3.77932	119.902	2.5e-06	0.000121235
112849	ENSG00000126790	L3HYPDH	trans-L-3-hydroxyproline dehydratase	1.14684	4.03503	114.548	3e-06	0.000138803
10799	ENSG00000124787	RPP40	ribonuclease P/MRP subunit p40	1.18052	4.23069	113.79	3.08e-06	0.000140368
144577	ENSG00000174206	KICS2	KICSTOR subunit 2	1.26208	5.36533	112.114	3.27e-06	0.000146711
283576	ENSG00000177108	ZDHHC22	zinc finger DHHC-type palmitoyltransferase 22	2.99817	0.315465	111.948	3.29e-06	0.000147013
4602	ENSG00000118513	MYB	MYB proto-oncogene, transcription factor	1.1683	6.04155	111.034	3.4e-06	0.000149856
7164	ENSG00000111907	TPD52L1	TPD52 like 1	1.07055	7.87207	111.368	3.4e-06	0.000149856
54910	ENSG00000168758	SEMA4C	semaphorin 4C	-1.0491	8.20486	110.448	3.49e-06	0.000152091
5168	ENSG00000136960	ENPP2	ectonucleotide pyrophosphatase/phosphodiesterase 2	5.75834	-1.22715	109.859	3.55e-06	0.00015323
90233	ENSG00000204519	ZNF551	zinc finger protein 551	1.04399	3.69295	108.991	3.67e-06	0.000156241
653149	ENSG00000186086	NBPF6	NBPF member 6	2.70304	0.322541	108.548	3.73e-06	0.000157417
3708	ENSG00000150995	ITPR1	inositol 1,4,5-trisphosphate receptor type 1	1.93372	4.41963	113.223	3.76e-06	0.000158595
116071	ENSG00000168062	BATF2	basic leucine zipper ATF-like transcription factor 2	-1.32403	2.97177	107.682	3.85e-06	0.000160243
153769	ENSG00000156463	SH3RF2	SH3 domain containing ring finger 2	2.44618	0.961655	107.514	3.87e-06	0.000160867
10420	ENSG00000070759	TESK2	testis associated actin remodelling kinase 2	-1.19953	3.10405	107.102	3.93e-06	0.000161897
8291	ENSG00000135636	DYSF	dysferlin	3.05793	0.744559	105.522	4.17e-06	0.000169372
84456	ENSG00000198945	L3MBTL3	L3MBTL histone methyl-lysine binding protein 3	-1.74781	1.54145	105.332	4.2e-06	0.000169698
1944	ENSG00000143590	EFNA3	ephrin A3	-1.62837	4.9767	109.908	4.23e-06	0.000169817
126375	ENSG00000180884	ZNF792	zinc finger protein 792	-1.17954	2.68405	104.07	4.41e-06	0.00017538
5152	ENSG00000160191	PDE9A	phosphodiesterase 9A	-1.26443	3.70532	103.733	4.47e-06	0.000176469
27443	ENSG00000099954	CECR2	CECR2 histone acetyl-lysine reader	-1.00956	4.13498	103.12	4.57e-06	0.000179891
200845	ENSG00000168301	KCTD6	potassium channel tetramerization domain containing 6	1.05362	3.40739	102.327	4.71e-06	0.000183064
2852	ENSG00000164850	GPER1	G protein-coupled estrogen receptor 1	-1.66353	4.81606	106.782	4.73e-06	0.000183105
5507	ENSG00000119938	PPP1R3C	protein phosphatase 1 regulatory subunit 3C	-1.14952	5.58744	102.209	4.74e-06	0.000183105
55646	ENSG00000145220	LYAR	Ly1 antibody reactive	1.25569	5.07739	101.837	4.81e-06	0.000184978
8522	ENSG00000007237	GAS7	growth arrest specific 7	3.86298	-0.440427	100.047	5.16e-06	0.000194696
388228	ENSG00000188322	SBK1	SH3 domain binding kinase 1	-1.49615	5.68629	103.122	5.42e-06	0.000199398
84541	ENSG00000163376	KBTBD8	kelch repeat and BTB domain containing 8	1.49208	2.85871	98.1875	5.56e-06	0.000202845
64699	ENSG00000160183	TMPRSS3	transmembrane serine protease 3	1.72681	2.48552	96.666	5.91e-06	0.000212317
4854	ENSG00000074181	NOTCH3	notch receptor 3	-1.03761	7.78407	98.7158	6.04e-06	0.000214466
645332	ENSG00000290994	FAM86C2P	family with sequence similarity 86, member A pseudogene	1.04547	2.95939	95.9448	6.09e-06	0.000214466
51175	ENSG00000074935	TUBE1	tubulin epsilon 1	1.01431	3.05741	95.6041	6.18e-06	0.000216125
9381	ENSG00000115155	OTOF	otoferlin	4.42519	-1.13748	95.6279	6.17e-06	0.000216125
1140	ENSG00000170175	CHRNB1	cholinergic receptor nicotinic beta 1 subunit	-1.04475	2.71815	92.816	6.94e-06	0.000236455
2899	ENSG00000163873	GRIK3	glutamate ionotropic receptor kainate type subunit 3	1.52388	1.55716	91.7058	7.28e-06	0.000243756
8204	ENSG00000180530	NRIP1	nuclear receptor interacting protein 1	1.08425	7.34645	93.1848	8.04e-06	0.000263677
200942	ENSG00000185909	KLHDC8B	kelch domain containing 8B	-1.34789	3.16552	89.2268	8.11e-06	0.000264832
80320	ENSG00000189120	SP6	Sp6 transcription factor	-1.14484	4.69954	89.0606	8.17e-06	0.000265975
286042	ENSG00000173295	FAM86B3P	family with sequence similarity 86, member A pseudogene	1.48893	2.59936	88.7459	8.29e-06	0.000268323
1960	ENSG00000179388	EGR3	early growth response 3	2.79407	4.76763	102.868	8.6e-06	0.00027619
283212	ENSG00000149243	KLHL35	kelch like family member 35	1.24653	2.49001	87.7221	8.68e-06	0.000276918
84187	ENSG00000157600	TMEM164	transmembrane protein 164	1.19779	4.89191	87.6745	8.7e-06	0.000276918
101929780	ENSG00000291005	NBPF25P	NBPF member 25, pseudogene	1.04694	2.57837	87.4609	8.78e-06	0.000278364
56999	ENSG00000163638	ADAMTS9	ADAM metallopeptidase with thrombospondin type 1 motif 9	1.47175	3.69283	86.9041	9e-06	0.000282141
81031	ENSG00000197496	SLC2A10	solute carrier family 2 member 10	-1.04074	5.88725	86.4968	9.17e-06	0.000285383
150	ENSG00000150594	ADRA2A	adrenoceptor alpha 2A	3.57812	-1.34959	86.2203	9.29e-06	0.000286982
200316	ENSG00000128394	APOBEC3F	apolipoprotein B mRNA editing enzyme catalytic subunit 3F	-1.43933	1.3255	85.8112	9.46e-06	0.000290876
23493	ENSG00000135547	HEY2	hes related family bHLH transcription factor with YRPW motif 2	2.56834	0.926459	85.2509	9.71e-06	0.000295893
857	ENSG00000105974	CAV1	caveolin 1	1.53825	3.26227	85.2559	9.71e-06	0.000295893
6387	ENSG00000107562	CXCL12	C-X-C motif chemokine ligand 12	2.42947	6.06846	99.0402	9.88e-06	0.000299572
10761	ENSG00000170965	PLAC1	placenta enriched 1	2.06685	0.363113	83.5891	1.05e-05	0.00030918
140688	ENSG00000197183	NOL4L	nucleolar protein 4 like	-1.70047	4.77278	86.791	1.06e-05	0.000309726
256309	ENSG00000168491	CCDC110	coiled-coil domain containing 110	1.90768	1.04748	83.4148	1.06e-05	0.000309726
65260	ENSG00000162377	COA7	cytochrome c oxidase assembly factor 7	1.0474	5.47398	83.0711	1.07e-05	0.000311981
7832	ENSG00000159388	BTG2	BTG anti-proliferation factor 2	-1.27596	5.98044	86.4962	1.07e-05	0.000311981
29078	ENSG00000123545	NDUFAF4	NADH:ubiquinone oxidoreductase complex assembly factor 4	1.16579	4.04186	82.8507	1.09e-05	0.000314217
10507	ENSG00000187764	SEMA4D	semaphorin 4D	-1.11819	4.55826	81.5799	1.15e-05	0.00032899
3909	ENSG00000053747	LAMA3	laminin subunit alpha 3	1.44557	5.17797	84.5852	1.17e-05	0.000331044
5453	ENSG00000185668	POU3F1	POU class 3 homeobox 1	3.37409	-0.937184	81.0873	1.18e-05	0.00033419
3223	ENSG00000197757	HOXC6	homeobox C6	-1.28955	2.44977	80.9397	1.19e-05	0.000335715
83888	ENSG00000137441	FGFBP2	fibroblast growth factor binding protein 2	4.36808	-1.64725	80.4369	1.22e-05	0.000339994
5027	ENSG00000089041	P2RX7	purinergic receptor P2X 7	2.0899	0.198032	80.069	1.24e-05	0.000344388
80312	ENSG00000138336	TET1	tet methylcytosine dioxygenase 1	-1.03599	3.23347	79.506	1.28e-05	0.000349757
158763	ENSG00000147256	ARHGAP36	Rho GTPase activating protein 36	3.30097	-0.0378939	79.2322	1.29e-05	0.000353407
10622	ENSG00000113356	POLR3G	RNA polymerase III subunit G	1.05344	2.85192	78.9215	1.31e-05	0.000357216
3087	ENSG00000152804	HHEX	hematopoietically expressed homeobox	-1.51392	1.77881	78.1701	1.36e-05	0.000366856
153364	ENSG00000176055	MBLAC2	metallo-beta-lactamase domain containing 2	1.14002	3.80653	77.9338	1.38e-05	0.000369572
163732	ENSG00000179862	CITED4	Cbp/p300 interacting transactivator with Glu/Asp rich carboxy-terminal domain 4	1.14531	2.8168	77.8108	1.39e-05	0.000369572
85446	ENSG00000136367	ZFHX2	zinc finger homeobox 2	-1.4751	3.48691	77.762	1.39e-05	0.000369921
100125556	ENSG00000291071	FAM86JP	family with sequence similarity 86, member A pseudogene	1.03838	2.53064	77.1913	1.43e-05	0.00037842
56342	ENSG00000130810	PPAN	peter pan homolog	1.16173	2.35121	76.4664	1.49e-05	0.000389674
64859	ENSG00000173559	NABP1	nucleic acid binding protein 1	1.20442	4.73307	76.0771	1.52e-05	0.000393049
55638	ENSG00000147642	SYBU	syntabulin	1.58358	2.09701	75.9456	1.53e-05	0.000394908
400793	ENSG00000239887	C1orf226	chromosome 1 open reading frame 226	1.56585	5.79214	81.2492	1.6e-05	0.00040933
347902	ENSG00000139211	AMIGO2	adhesion molecule with Ig like domain 2	-1.10755	7.32904	77.7759	1.61e-05	0.00041003
4889	ENSG00000164129	NPY5R	neuropeptide Y receptor Y5	1.12899	2.75289	74.8883	1.61e-05	0.00041003
342527	ENSG00000188176	SMTNL2	smoothelin like 2	1.63574	2.36855	74.48	1.65e-05	0.000417433
29104	ENSG00000156239	N6AMT1	N-6 adenine-specific DNA methyltransferase 1	1.0391	3.47128	74.1623	1.67e-05	0.000421998
6563	ENSG00000141469	SLC14A1	solute carrier family 14 member 1 (Kidd blood group)	2.29258	0.860372	72.6338	1.81e-05	0.000446671
23498	ENSG00000162882	HAAO	3-hydroxyanthranilate 3,4-dioxygenase	2.36695	0.251603	72.1544	1.86e-05	0.000450119
3572	ENSG00000134352	IL6ST	interleukin 6 cytokine family signal transducer	1.41806	5.94642	77.6573	1.86e-05	0.000450119
84864	ENSG00000170854	RIOX2	ribosomal oxygenase 2	1.22345	5.239	74.9047	1.86e-05	0.000450119
339122	ENSG00000172780	RAB43	RAB43, member RAS oncogene family	-1.10874	2.09268	71.5741	1.92e-05	0.000461897
90525	ENSG00000138606	SHF	Src homology 2 domain containing F	-1.38051	2.10455	71.2593	1.95e-05	0.000468566
440503	ENSG00000214456	PLIN5	perilipin 5	1.28393	2.48261	71.1935	1.96e-05	0.000469606
27198	ENSG00000196917	HCAR1	hydroxycarboxylic acid receptor 1	-1.10051	4.36181	70.7444	2.01e-05	0.000478
55222	ENSG00000172731	LRRC20	leucine rich repeat containing 20	-1.26748	3.39414	70.6781	2.02e-05	0.00047909
9953	ENSG00000125430	HS3ST3B1	heparan sulfate-glucosamine 3-sulfotransferase 3B1	1.68115	0.621588	70.4039	2.05e-05	0.000485035
594855	ENSG00000213578	CPLX3	complexin 3	3.52687	-0.101743	69.3885	2.16e-05	0.000505503
6446	ENSG00000118515	SGK1	serum/glucocorticoid regulated kinase 1	1.71768	3.0618	69.0396	2.21e-05	0.000512072
653	ENSG00000112175	BMP5	bone morphogenetic protein 5	1.99873	0.285475	68.1751	2.32e-05	0.000527888
126567	ENSG00000183186	C2CD4C	C2 calcium dependent domain containing 4C	-1.38941	2.33968	67.9083	2.35e-05	0.000534541
3131	ENSG00000108924	HLF	HLF transcription factor, PAR bZIP family member	1.8049	1.34837	67.8049	2.37e-05	0.000535621
3815	ENSG00000157404	KIT	KIT proto-oncogene, receptor tyrosine kinase	2.45235	-0.474361	67.1628	2.45e-05	0.000550712
79689	ENSG00000127954	STEAP4	STEAP4 metalloreductase	1.5855	0.567222	67.1388	2.46e-05	0.000550712
7225	ENSG00000137672	TRPC6	transient receptor potential cation channel subfamily C member 6	3.8438	-1.28213	66.9936	2.48e-05	0.000553215
646862	ENSG00000269855	RNF225	ring finger protein 225	-1.75002	0.342614	66.465	2.55e-05	0.000561806
4857	ENSG00000139910	NOVA1	NOVA alternative splicing regulator 1	-1.22762	2.73946	65.9892	2.63e-05	0.000571831
6340	ENSG00000166828	SCNN1G	sodium channel epithelial 1 subunit gamma	2.0934	1.59623	66.0069	2.62e-05	0.000571831
101927862	ENSG00000253978	TENM2-AS1	TENM2 antisense RNA 2	3.44714	-1.42999	65.9212	2.64e-05	0.000573324
140738	ENSG00000171227	TMEM37	transmembrane protein 37	-1.43008	1.37469	65.8107	2.65e-05	0.000573324
255324	ENSG00000182585	EPGN	epithelial mitogen	4.66495	-1.41678	65.4118	2.72e-05	0.000580018
93010	ENSG00000156966	B3GNT7	UDP-GlcNAc:betaGal beta-1,3-N-acetylglucosaminyltransferase 7	-1.83175	0.332698	64.8297	2.81e-05	0.000593282
4744	ENSG00000100285	NEFH	neurofilament heavy chain	3.52133	-0.626797	64.7754	2.82e-05	0.000593564
9770	ENSG00000101265	RASSF2	Ras association domain family member 2	-1.20433	2.80634	64.4763	2.87e-05	0.000601188
54751	ENSG00000162458	FBLIM1	filamin binding LIM protein 1	-1.06663	3.14814	64.2448	2.91e-05	0.000605354
80820	ENSG00000122547	EEPD1	endonuclease/exonuclease/phosphatase family domain containing 1	2.17309	1.97071	63.8596	2.98e-05	0.000614385
100287482	ENSG00000240204	SMKR1	small lysine rich protein 1	1.2057	2.97219	63.7169	3e-05	0.000618223
196993	ENSG00000225362	CT62	cancer/testis associated 62	1.48687	1.64243	63.4028	3.06e-05	0.000626368
5570	ENSG00000135549	PKIB	cAMP-dependent protein kinase inhibitor beta	1.09416	6.33218	65.5266	3.08e-05	0.000629276
192134	ENSG00000198488	B3GNT6	UDP-GlcNAc:betaGal beta-1,3-N-acetylglucosaminyltransferase 6	4.72682	-1.70537	62.6494	3.2e-05	0.00064739
155382	ENSG00000176428	VPS37D	VPS37D subunit of ESCRT-I	-1.51424	2.02516	62.2005	3.29e-05	0.000659977
100507524	ENSG00000243069	ARHGEF26-AS1	ARHGEF26 antisense RNA 1	1.8363	0.0899323	61.7713	3.38e-05	0.000670933
26468	ENSG00000106852	LHX6	LIM homeobox 6	1.22282	1.42023	61.5336	3.43e-05	0.000677016
638	ENSG00000100290	BIK	BCL2 interacting killer	-1.0865	3.05577	61.5304	3.43e-05	0.000677016
9486	ENSG00000115526	CHST10	carbohydrate sulfotransferase 10	1.04629	3.52335	61.5788	3.42e-05	0.000677016
64582	ENSG00000181619	GPR135	G protein-coupled receptor 135	1.01992	2.77095	61.1365	3.52e-05	0.000686447
2494	ENSG00000116833	NR5A2	nuclear receptor subfamily 5 group A member 2	4.38991	1.46406	64.4213	3.57e-05	0.000693778
100101467	ENSG00000186814	ZSCAN30	zinc finger and SCAN domain containing 30	-1.12059	3.5077	60.7681	3.6e-05	0.000697656
80256	ENSG00000005238	ATOSB	atos homolog B	-1.23839	3.6365	60.4861	3.66e-05	0.000707008
7041	ENSG00000140682	TGFB1I1	transforming growth factor beta 1 induced transcript 1	-1.03968	3.14704	60.1509	3.74e-05	0.000717402
100499467	ENSG00000227036	LINC00673	long intergenic non-protein coding RNA 673	3.15931	-0.286065	59.6729	3.85e-05	0.000736281
7942	ENSG00000112561	TFEB	transcription factor EB	-1.66293	1.26629	59.5702	3.88e-05	0.000740015
9722	ENSG00000198929	NOS1AP	nitric oxide synthase 1 adaptor protein	1.56462	4.56816	62.7642	3.89e-05	0.000740015
399694	ENSG00000185634	SHC4	SHC adaptor protein 4	1.04741	2.20883	59.1584	3.98e-05	0.000751946
338382	ENSG00000276600	RAB7B	RAB7B, member RAS oncogene family	4.85283	-2.01714	58.6688	4.11e-05	0.000767149
128272	ENSG00000142632	ARHGEF19	Rho guanine nucleotide exchange factor 19	-1.01966	3.82183	58.5398	4.15e-05	0.000771543
91373	ENSG00000197355	UAP1L1	UDP-N-acetylglucosamine pyrophosphorylase 1 like 1	-1.07012	5.6765	60.3434	4.2e-05	0.000779263
79966	ENSG00000145284	SCD5	stearoyl-CoA desaturase 5	-1.04525	4.603	58.1636	4.25e-05	0.000783856
3354	ENSG00000168830	HTR1E	5-hydroxytryptamine receptor 1E	1.44985	1.17469	58.0999	4.27e-05	0.000785527
23616	ENSG00000100092	SH3BP1	SH3 domain binding protein 1	-1.19856	2.96816	57.7342	4.37e-05	0.000798898
388389	ENSG00000167131	CCDC103	coiled-coil domain containing 103	-1.21756	1.8726	57.4359	4.46e-05	0.000810692
147463	ENSG00000154065	ANKRD29	ankyrin repeat domain 29	1.54965	0.566581	57.406	4.46e-05	0.000811453
200407	ENSG00000175874	CREG2	cellular repressor of E1A stimulated genes 2	1.19141	2.03592	56.945	4.6e-05	0.000828043
241	ENSG00000132965	ALOX5AP	arachidonate 5-lipoxygenase activating protein	3.42426	-1.75989	56.8259	4.64e-05	0.000831236
7042	ENSG00000092969	TGFB2	transforming growth factor beta 2	1.47859	3.34957	56.4913	4.78e-05	0.000848414
65998	ENSG00000188070	ZFTA	zinc finger translocation associated	-1.39186	3.58718	56.0279	5.03e-05	0.000883541
379	ENSG00000175906	ARL4D	ADP ribosylation factor like GTPase 4D	-1.71362	0.498104	55.2697	5.15e-05	0.000895234
283551	ENSG00000214900	LINC01588	long intergenic non-protein coding RNA 1588	1.22978	3.01671	54.997	5.25e-05	0.000901559
8660	ENSG00000185950	IRS2	insulin receptor substrate 2	1.00914	5.52532	56.8188	5.25e-05	0.000901559
23678	ENSG00000104205	SGK3	serum/glucocorticoid regulated kinase family member 3	2.01262	-0.151878	54.7135	5.35e-05	0.000912316
3221	ENSG00000198353	HOXC4	homeobox C4	-1.46341	1.15001	54.6616	5.37e-05	0.000913127
65243	ENSG00000187801	ZFP69B	ZFP69 zinc finger protein B	1.27489	1.92016	54.4732	5.44e-05	0.000922387
8693	ENSG00000257594	GALNT4	polypeptide N-acetylgalactosaminyltransferase 4	1.4387	1.31966	54.3339	5.49e-05	0.000929519
81569	ENSG00000117148	ACTL8	actin like 8	2.66007	-0.379009	53.4534	5.84e-05	0.000975203
26011	ENSG00000149256	TENM4	teneurin transmembrane protein 4	1.65083	3.46083	55.1557	5.86e-05	0.000976727
1820	ENSG00000116017	ARID3A	AT-rich interaction domain 3A	-1.18506	4.94238	54.9448	5.94e-05	0.000984285
8013	ENSG00000119508	NR4A3	nuclear receptor subfamily 4 group A member 3	1.43169	2.11785	53.132	5.97e-05	0.000988101
8309	ENSG00000168306	ACOX2	acyl-CoA oxidase 2	2.19586	0.388908	53.1125	5.98e-05	0.000988101
6926	ENSG00000135111	TBX3	T-box transcription factor 3	-1.21463	3.23302	52.8371	6.1e-05	0.000999614
81792	ENSG00000151388	ADAMTS12	ADAM metallopeptidase with thrombospondin type 1 motif 12	2.96112	0.754308	52.301	6.33e-05	0.00102517
10461	ENSG00000153208	MERTK	MER proto-oncogene, tyrosine kinase	1.33327	2.01126	51.7637	6.58e-05	0.00105391
3569	ENSG00000136244	IL6	interleukin 6	1.57775	1.38292	51.5437	6.69e-05	0.00106789
81848	ENSG00000187678	SPRY4	sprouty RTK signaling antagonist 4	2.08698	1.14073	50.4749	7.23e-05	0.00112812
80183	ENSG00000102445	RUBCNL	rubicon like autophagy enhancer	3.26118	-1.35625	50.2272	7.37e-05	0.0011419
56892	ENSG00000176907	TCIM	transcriptional and immune response regulator	1.22925	1.47804	50.0077	7.49e-05	0.00115413
9355	ENSG00000106689	LHX2	LIM homeobox 2	-1.05386	2.10335	49.0364	8.05e-05	0.00121215
401265	ENSG00000124743	KLHL31	kelch like family member 31	1.36798	1.26038	48.9213	8.12e-05	0.00122068
494143	ENSG00000143942	CHAC2	ChaC glutathione specific gamma-glutamylcyclotransferase 2	1.01165	3.60044	48.878	8.15e-05	0.0012226
57464	ENSG00000128578	STRIP2	striatin interacting protein 2	1.72206	0.114196	48.8558	8.16e-05	0.0012226
2171	ENSG00000164687	FABP5	fatty acid binding protein 5	1.14167	2.50696	48.7448	8.23e-05	0.00122878
341359	ENSG00000110975	SYT10	synaptotagmin 10	1.33507	2.27144	48.5353	8.36e-05	0.00124538
133308	ENSG00000164038	SLC9B2	solute carrier family 9 member B2	1.23497	2.8256	48.3695	8.47e-05	0.00125491
2645	ENSG00000106633	GCK	glucokinase	2.66185	-1.32179	48.1155	8.64e-05	0.00127318
192670	ENSG00000134698	AGO4	argonaute RISC component 4	-1.15295	4.20177	48.9656	8.7e-05	0.00127896
57121	ENSG00000184574	LPAR5	lysophosphatidic acid receptor 5	-1.27677	1.00223	47.9098	8.77e-05	0.00128707
399473	ENSG00000188766	SPRED3	sprouty related EVH1 domain containing 3	-2.10063	1.60211	47.6944	8.92e-05	0.00130005
123920	ENSG00000140931	CMTM3	CKLF like MARVEL transmembrane domain containing 3	-1.12705	2.05656	47.1019	9.34e-05	0.00134917
140876	ENSG00000042062	RIPOR3	RIPOR family member 3	1.18955	4.91238	48.2153	9.58e-05	0.00137247
2020	ENSG00000164778	EN2	engrailed homeobox 2	1.01222	2.01661	46.724	9.62e-05	0.00137522
5032	ENSG00000244165	P2RY11	purinergic receptor P2Y11	1.44318	1.46016	46.3485	9.91e-05	0.00140869
4248	ENSG00000128268	MGAT3	beta-1,4-mannosyl-glycoprotein 4-beta-N-acetylglucosaminyltransferase	1.38875	1.3009	46.2281	0.000100084	0.00141881
79805	ENSG00000143494	VASH2	vasohibin 2	-1.05516	1.70443	45.6947	0.000104442	0.00146302
2651	ENSG00000111846	GCNT2	glucosaminyl (N-acetyl) transferase 2 (I blood group)	-1.11326	3.39464	45.447	0.000106546	0.0014831
23541	ENSG00000100003	SEC14L2	SEC14 like lipid binding 2	1.63081	2.73905	45.7682	0.000108819	0.00150932
1943	ENSG00000099617	EFNA2	ephrin A2	-1.7605	-0.167519	44.9478	0.000110945	0.0015299
84675	ENSG00000147573	TRIM55	tripartite motif containing 55	1.16168	1.67939	44.8603	0.000111739	0.00153726
79953	ENSG00000101463	SYNDIG1	synapse differentiation inducing 1	1.08991	1.53163	44.7534	0.00011272	0.00154834
91893	ENSG00000255561	FDXACB1	ferredoxin-fold anticodon binding domain containing 1	1.00023	2.2403	44.6806	0.000113393	0.00155503
196743	ENSG00000148832	PAOX	polyamine oxidase	-1.10817	1.95683	44.3695	0.000116327	0.00158073
55701	ENSG00000165801	ARHGEF40	Rho guanine nucleotide exchange factor 40	-1.38228	2.9484	44.1587	0.000118368	0.0016051
54858	ENSG00000130517	PGPEP1	pyroglutamyl-peptidase I	-1.14459	5.10031	45.2533	0.000120425	0.00162372
102606465	ENSG00000233184	DPH5-DT	DPH5 divergent transcript	1.08628	1.83066	43.7593	0.000122358	0.00164127
10687	ENSG00000240694	PNMA2	PNMA family member 2	-1.39079	1.91827	43.5598	0.000124413	0.00165453
4281	ENSG00000101871	MID1	midline 1	1.28234	0.872237	43.5683	0.000124325	0.00165453
6591	ENSG00000019549	SNAI2	snail family transcriptional repressor 2	1.55836	0.0722177	43.5552	0.000124461	0.00165453
151887	ENSG00000091986	CCDC80	coiled-coil domain containing 80	1.06273	1.61502	43.4743	0.000125307	0.00166444
145741	ENSG00000198535	C2CD4A	C2 calcium dependent domain containing 4A	1.38204	1.23719	43.3911	0.000126185	0.00167233
56603	ENSG00000003137	CYP26B1	cytochrome P450 family 26 subfamily B member 1	2.07753	2.10273	44.4816	0.000128095	0.00168879
84626	ENSG00000133619	KRBA1	KRAB-A domain containing 1	-1.10217	3.61118	43.1604	0.000128658	0.00169495
10385	ENSG00000124508	BTN2A2	butyrophilin subfamily 2 member A2	-1.15709	3.42082	43.0986	0.000129331	0.00170255
3757	ENSG00000055118	KCNH2	potassium voltage-gated channel subfamily H member 2	-1.37885	3.77073	44.2758	0.000130241	0.00171199
606293	ENSG00000290915	KLKP1	kallikrein pseudogene 1	1.25244	1.83069	42.6678	0.000134141	0.00174769
146395	ENSG00000169181	GSG1L	GSG1 like	1.39028	0.556975	42.6302	0.000134573	0.00175201
57624	ENSG00000144460	NYAP2	neuronal tyrosine-phosphorylated phosphoinositide-3-kinase adaptor 2	1.23914	0.813139	42.4448	0.000136719	0.00177085
345557	ENSG00000182836	PLCXD3	phosphatidylinositol specific phospholipase C X domain containing 3	1.02084	2.06393	42.3275	0.000138099	0.00178481
100287896	ENSG00000254837	LIPT2-AS1	LIPT2 antisense RNA 1	1.06743	2.32603	42.247	0.000139056	0.00178934
79575	ENSG00000127220	ABHD8	abhydrolase domain containing 8	-1.00198	2.80546	42.0922	0.00014092	0.00180937
23767	ENSG00000125848	FLRT3	fibronectin leucine rich transmembrane protein 3	1.09198	3.58178	41.9768	0.00014233	0.00181625
3714	ENSG00000184916	JAG2	jagged canonical Notch ligand 2	-1.04363	5.04597	43.1832	0.000142416	0.00181625
54345	ENSG00000203883	SOX18	SRY-box transcription factor 18	-1.08572	1.2182	41.679	0.000146048	0.00184946
3434	ENSG00000185745	IFIT1	interferon induced protein with tetratricopeptide repeats 1	-1.00528	8.61864	44.4534	0.000149445	0.00187532
4330	ENSG00000169184	MN1	MN1 proto-oncogene, transcriptional regulator	1.3794	0.140179	41.3812	0.000149886	0.00187952
6559	ENSG00000070915	SLC12A3	solute carrier family 12 member 3	2.5958	-0.982256	41.3058	0.000150879	0.00188795
112714	ENSG00000152086	TUBA3E	tubulin alpha 3e	2.77085	-0.161044	41.2859	0.000151141	0.00188991
9413	ENSG00000135063	ENTREP1	endosomal transmembrane epsin interactor 1	2.06213	-0.034804	40.9633	0.000155486	0.00193468
254065	ENSG00000165288	BRWD3	bromodomain and WD repeat domain containing 3	-1.29208	4.17678	41.9535	0.000157855	0.00195167
84668	ENSG00000122591	HYCC1	hyccin PI4KA lipid kinase complex subunit 1	1.00864	2.82757	40.7322	0.000158693	0.00195583
8626	ENSG00000073282	TP63	tumor protein p63	1.39308	0.975771	40.6369	0.000160041	0.00196647
340533	ENSG00000050030	NEXMIF	neurite extension and migration factor	-1.44702	0.574555	40.5687	0.000161013	0.00197021
27063	ENSG00000148677	ANKRD1	ankyrin repeat domain 1	2.69455	-0.198666	40.5405	0.000161416	0.00197378
731220	ENSG00000196460	RFX8	regulatory factor X8	2.71716	-1.35621	40.5032	0.000161953	0.00197762
1003	ENSG00000179776	CDH5	cadherin 5	1.69335	-0.0738587	40.4336	0.000162959	0.00198579
115330	ENSG00000164849	GPR146	G protein-coupled receptor 146	-1.20351	0.715827	40.3857	0.000163657	0.00198609
64114	ENSG00000135926	TMBIM1	transmembrane BAX inhibitor motif containing 1	-1.1242	3.88826	41.1132	0.000163584	0.00198609
23220	ENSG00000110042	DTX4	deltex E3 ubiquitin ligase 4	-1.4478	3.15393	41.1403	0.000169213	0.00203135
10636	ENSG00000169220	RGS14	regulator of G protein signaling 14	-1.18635	1.31869	39.9871	0.000169607	0.00203335
56944	ENSG00000116774	OLFML3	olfactomedin like 3	1.45008	4.64309	42.8435	0.000171497	0.00205032
54839	ENSG00000137821	LRRC49	leucine rich repeat containing 49	1.14356	0.863707	39.7977	0.000172526	0.00205568
64283	ENSG00000214944	ARHGEF28	Rho guanine nucleotide exchange factor 28	1.04895	3.70647	39.7681	0.000172989	0.00205981
11189	ENSG00000159409	CELF3	CUGBP Elav-like family member 3	-1.67614	1.80106	39.4358	0.000178281	0.00210723
8817	ENSG00000156427	FGF18	fibroblast growth factor 18	1.16413	1.56007	39.4282	0.000178405	0.0021073
54898	ENSG00000197977	ELOVL2	ELOVL fatty acid elongase 2	1.53362	1.25858	39.4192	0.000178551	0.00210759
9214	ENSG00000162894	FCMR	Fc mu receptor	2.27923	-0.247554	39.1426	0.000183118	0.00214721
1015	ENSG00000079112	CDH17	cadherin 17	3.29445	-2.07022	38.9792	0.000185883	0.00217244
9955	ENSG00000153976	HS3ST3A1	heparan sulfate-glucosamine 3-sulfotransferase 3A1	1.80924	-0.827145	38.778	0.00018936	0.00220435
55065	ENSG00000132517	SLC52A1	solute carrier family 52 member 1	-1.09782	1.8151	38.7258	0.000190277	0.00221211
387496	ENSG00000122035	RASL11A	RAS like family 11 member A	1.47736	0.67053	38.6539	0.000191545	0.00222247
127707	ENSG00000179023	KLHDC7A	kelch domain containing 7A	-1.08787	1.18217	38.6419	0.000191759	0.0022235
5271	ENSG00000166401	SERPINB8	serpin family B member 8	1.31892	0.617569	38.5832	0.000192804	0.00223415
219623	ENSG00000196932	TMEM26	transmembrane protein 26	1.31036	0.665833	38.5356	0.000193657	0.00223818
4843	ENSG00000007171	NOS2	nitric oxide synthase 2	3.26261	-1.93726	38.5376	0.000193621	0.00223818
197196	ENSG00000179219	LINC00311	long intergenic non-protein coding RNA 311	2.52203	-1.61553	38.3522	0.000196987	0.00226484
286336	ENSG00000126882	FAM78A	family with sequence similarity 78 member A	-1.03851	2.18547	38.2826	0.00019827	0.00227368
100506281	ENSG00000240338	LOC100506281	uncharacterized LOC100506281	-1.6888	0.0914724	38.2349	0.000199155	0.00228235
6935	ENSG00000148516	ZEB1	zinc finger E-box binding homeobox 1	1.18864	0.288632	37.8903	0.000205694	0.00233613
57091	ENSG00000087589	CASS4	Cas scaffold protein family member 4	1.3727	0.676111	37.6325	0.000210761	0.0023769
57476	ENSG00000023171	GRAMD1B	GRAM domain containing 1B	1.50185	0.704801	37.1147	0.000221411	0.00245941
5333	ENSG00000187091	PLCD1	phospholipase C delta 1	-1.0358	1.87794	37.1034	0.00022165	0.00245969
2069	ENSG00000124882	EREG	epiregulin	2.48543	-0.889095	36.998	0.000223902	0.00247621
85002	ENSG00000186523	FAM86B1	family with sequence similarity 86 member B1	1.20673	1.64361	36.9464	0.000225015	0.00248231
131578	ENSG00000172061	LRRC15	leucine rich repeat containing 15	2.3356	-0.566699	36.8454	0.000227213	0.00249811
163154	ENSG00000212123	PRR22	proline rich 22	1.71711	1.24572	36.8441	0.00022724	0.00249811
1848	ENSG00000139318	DUSP6	dual specificity phosphatase 6	1.0363	1.61052	36.8244	0.000227673	0.00249838
219833	ENSG00000174370	KCNJ5-AS1	KCNJ5 antisense RNA 1	-1.07733	1.02845	36.5188	0.000234502	0.0025451
57524	ENSG00000167971	CASKIN1	CASK interacting protein 1	-1.57736	3.01021	37.4963	0.000234525	0.0025451
79570	ENSG00000084628	NKAIN1	sodium/potassium transporting ATPase interacting 1	1.63522	0.809613	36.5247	0.000234368	0.0025451
9294	ENSG00000267534	S1PR2	sphingosine-1-phosphate receptor 2	-1.45275	2.15586	36.4619	0.000235801	0.00255358
222950	ENSG00000166924	NYAP1	neuronal tyrosine phosphorylated phosphoinositide-3-kinase adaptor 1	-2.73537	-0.470188	36.3579	0.0002382	0.00257
5101	ENSG00000184226	PCDH9	protocadherin 9	1.03508	1.71425	36.3619	0.000238107	0.00257
10633	ENSG00000100276	RASL10A	RAS like family 10 member A	1.69299	-0.191823	36.1837	0.000242282	0.00259362
139065	ENSG00000179542	SLITRK4	SLIT and NTRK like family member 4	1.25615	1.39747	36.1566	0.000242927	0.00259867
85027	ENSG00000256235	SMIM3	small integral membrane protein 3	-1.10941	1.89602	36.0884	0.000244554	0.00260691
639	ENSG00000057657	PRDM1	PR/SET domain 1	2.2985	-0.807124	35.962	0.000247608	0.00262996
7091	ENSG00000106829	TLE4	TLE family member 4, transcriptional corepressor	1.67663	0.504893	35.8767	0.000249693	0.00264734
7482	ENSG00000134245	WNT2B	Wnt family member 2B	-1.19166	1.89097	35.7786	0.00025212	0.00266351
27290	ENSG00000122711	SPINK4	serine peptidase inhibitor Kazal type 4	1.3894	-0.2156	35.6974	0.000254153	0.0026754
4915	ENSG00000148053	NTRK2	neurotrophic receptor tyrosine kinase 2	3.82027	-0.669157	35.7081	0.000253882	0.0026754
23237	ENSG00000198576	ARC	activity regulated cytoskeleton associated protein	1.05773	1.40038	35.5806	0.000257109	0.0027017
30846	ENSG00000024422	EHD2	EH domain containing 2	-1.00818	3.43659	35.5157	0.00025877	0.0027112
2731	ENSG00000178445	GLDC	glycine decarboxylase	1.29501	1.48819	35.3243	0.000263746	0.00274215
79935	ENSG00000105219	CCNP	cyclin P	1.21882	1.93958	35.2296	0.000266253	0.00276011
1490	ENSG00000118523	CCN2	cellular communication network factor 2	1.21646	1.90607	35.1757	0.000267693	0.00276694
23092	ENSG00000145819	ARHGAP26	Rho GTPase activating protein 26	1.53204	-0.277758	35.0211	0.000271875	0.00279834
392617	ENSG00000225968	ELFN1	extracellular leucine rich repeat and fibronectin type III domain containing 1	-1.49251	2.01005	35.0167	0.000271995	0.00279834
124590	ENSG00000182040	USH1G	USH1 protein network component sans	-1.63101	0.0599094	34.8185	0.000277481	0.00283665
744	ENSG00000066382	MPPED2	metallophosphoesterase domain containing 2	1.9343	1.00674	34.4965	0.000286685	0.00290726
83394	ENSG00000091622	PITPNM3	PITPNM family member 3	-1.38076	2.03457	34.4473	0.000288122	0.00291847
100129461	ENSG00000272142	LYRM4-AS1	LYRM4 antisense RNA 1	1.08123	1.97872	33.8774	0.000305463	0.00306388
161835	ENSG00000150667	FSIP1	fibrous sheath interacting protein 1	1.44441	-0.146854	33.774	0.000308744	0.00308675
3624	ENSG00000122641	INHBA	inhibin subunit beta A	1.08396	0.64978	33.6843	0.00031163	0.00311208
8110	ENSG00000205683	DPF3	double PHD fingers 3	-1.4125	0.742427	33.5053	0.000317482	0.00314921
55824	ENSG00000076641	PAG1	phosphoprotein membrane anchor with glycosphingolipid microdomains 1	1.11309	0.367209	33.362	0.000322267	0.00318597
79674	ENSG00000197415	VEPH1	ventricular zone expressed PH domain containing 1	1.27543	2.87203	33.2434	0.000326293	0.0032132
89766	ENSG00000177398	UMODL1	uromodulin like 1	1.56172	0.0745653	33.0563	0.000332775	0.00325891
101929748	ENSG00000288062	LOC101929748	uncharacterized LOC101929748	2.51585	-1.3525	32.9127	0.000337853	0.00329959
6578	ENSG00000174640	SLCO2A1	solute carrier organic anion transporter family member 2A1	2.0925	-1.21424	32.9125	0.00033786	0.00329959
933	ENSG00000012124	CD22	CD22 molecule	2.3434	1.01575	33.4202	0.000338494	0.00330031
23349	ENSG00000122733	PHF24	PHD finger protein 24	2.46217	-1.85643	32.8743	0.00033923	0.00330204
55964	ENSG00000100167	SEPTIN3	septin 3	-1.00595	2.2565	32.8365	0.00034059	0.00331345
640	ENSG00000136573	BLK	BLK proto-oncogene, Src family tyrosine kinase	2.74459	-1.33305	32.63	0.000348141	0.00337394
51575	ENSG00000089048	ESF1	ESF1 nucleolar pre-rRNA processing protein homolog	1.15131	5.80048	34.8416	0.000357376	0.00343553
11219	ENSG00000183479	TREX2	three prime repair exonuclease 2	1.19783	0.654755	32.1624	0.00036602	0.00348673
118672	ENSG00000179988	PSTK	phosphoseryl-tRNA kinase	1.21982	1.60517	32.0114	0.000372034	0.00353014
57481	ENSG00000250423	KIAA1210	KIAA1210	3.1342	-2.17994	31.8877	0.000377051	0.00356057
140	ENSG00000282608	ADORA3	adenosine A3 receptor	2.75814	-2.00035	31.7407	0.000383122	0.00360333
55244	ENSG00000142494	SLC47A1	solute carrier family 47 member 1	2.94717	0.0950557	32.0623	0.000383835	0.0036054
10382	ENSG00000104833	TUBB4A	tubulin beta 4A class IVa	-1.87194	0.730518	31.662	0.000386422	0.00362393
64101	ENSG00000128594	LRRC4	leucine rich repeat containing 4	1.4041	0.0382369	31.2532	0.000404143	0.00374451
642938	ENSG00000188916	INSYN2A	inhibitory synaptic factor 2A	1.1584	0.595032	31.2216	0.000405557	0.00375368
26056	ENSG00000135631	RAB11FIP5	RAB11 family interacting protein 5	-1.17805	2.95076	31.1822	0.000407322	0.00376411
8743	ENSG00000121858	TNFSF10	TNF superfamily member 10	-1.0077	1.15232	31.1678	0.000407973	0.00376816
101669762	ENSG00000281406	BLACAT1	BLACAT1 overlapping LEMD1 locus	-2.53555	0.11193	30.661	0.000431629	0.0039399
152831	ENSG00000134962	KLB	klotho beta	1.19877	1.51991	30.5492	0.000437075	0.00396254
283248	ENSG00000167771	RCOR2	REST corepressor 2	-1.57099	3.01374	31.3063	0.000436268	0.00396254
9048	ENSG00000117407	ARTN	artemin	1.40307	0.889212	30.4293	0.000443009	0.00400404
283358	ENSG00000139044	B4GALNT3	beta-1,4-N-acetyl-galactosaminyltransferase 3	1.96405	-1.51973	30.2695	0.000451075	0.00406243
64174	ENSG00000167261	DPEP2	dipeptidase 2	2.71609	-0.748686	30.164	0.0004565	0.00410098
3665	ENSG00000185507	IRF7	interferon regulatory factor 7	-1.58684	-0.958641	30.0727	0.000461257	0.00412684
59335	ENSG00000130711	PRDM12	PR/SET domain 12	1.11094	0.285755	30.0259	0.000463721	0.00413913
8456	ENSG00000109101	FOXN1	forkhead box N1	2.03109	-0.0706665	30.032	0.000463401	0.00413913
401236	ENSG00000230873	STMND1	stathmin domain containing 1	2.88413	-1.92516	29.7799	0.000476939	0.00422445
1734	ENSG00000211448	DIO2	iodothyronine deiodinase 2	1.94459	-1.00524	29.4821	0.000493571	0.00434137
91461	ENSG00000162878	PKDCC	protein kinase domain containing, cytoplasmic	1.32944	-0.323883	29.3027	0.000503934	0.00441061
165140	ENSG00000162881	OXER1	oxoeicosanoid receptor 1	2.60287	-1.21069	29.2878	0.000504805	0.00441605
79041	ENSG00000072954	TMEM38A	transmembrane protein 38A	-1.05594	2.19195	29.2082	0.000509499	0.00444933
387856	ENSG00000177875	CCDC184	coiled-coil domain containing 184	-1.36974	-0.465308	29.0677	0.000517916	0.00450385
153	ENSG00000043591	ADRB1	adrenoceptor beta 1	1.34756	0.857318	28.9881	0.000522763	0.00451934
3783	ENSG00000104783	KCNN4	potassium calcium-activated channel subfamily N member 4	-1.29947	3.95284	30.2269	0.000529915	0.00456356
2675	ENSG00000168546	GFRA2	GDNF family receptor alpha 2	3.96875	-2.30617	28.8104	0.000533783	0.0045924
285386	ENSG00000188001	TPRG1	tumor protein p63 regulated 1	1.33373	0.0137065	28.7854	0.000535362	0.00460343
1103	ENSG00000070748	CHAT	choline O-acetyltransferase	6.54144	-2.80466	38.9175	0.000552955	0.00472292
26278	ENSG00000151835	SACS	sacsin molecular chaperone	1.80145	4.31808	30.9819	0.000562426	0.00478305
374907	ENSG00000177191	B3GNT8	UDP-GlcNAc:betaGal beta-1,3-N-acetylglucosaminyltransferase 8	-1.41647	0.680384	28.026	0.000586007	0.00493442
57514	ENSG00000031081	ARHGAP31	Rho GTPase activating protein 31	-1.13821	1.02026	27.9611	0.000590608	0.00496548
3763	ENSG00000157542	KCNJ6	potassium inwardly rectifying channel subfamily J member 6	2.70462	-2.02018	27.9163	0.000593804	0.00498525
201853	ENSG00000248360	LINC00504	long intergenic non-protein coding RNA 504	1.33075	-0.00725765	27.8413	0.000599206	0.00502108
56034	ENSG00000145431	PDGFC	platelet derived growth factor C	-1.18286	0.71702	27.8242	0.000600447	0.00502434
140803	ENSG00000119121	TRPM6	transient receptor potential cation channel subfamily M member 6	1.73402	-0.664656	27.7671	0.000604618	0.00504546
654429	ENSG00000166159	LRTM2	leucine rich repeats and transmembrane domains 2	1.71882	-0.551205	27.7592	0.000605193	0.00504736
140862	ENSG00000101230	ISM1	isthmin 1	1.64841	0.266578	27.6044	0.000616687	0.00511432
348093	ENSG00000166831	RBPMS2	RNA binding protein, mRNA processing factor 2	-1.11381	1.34206	27.5819	0.000618373	0.0051211
7786	ENSG00000139625	MAP3K12	mitogen-activated protein kinase kinase kinase 12	-1.31381	5.12854	29.983	0.000624738	0.0051525
399668	ENSG00000178947	SMIM10L2A	small integral membrane protein 10 like 2A	-1.46007	0.815079	27.4839	0.000625813	0.00515619
219537	ENSG00000214872	SMTNL1	smoothelin like 1	-1.6485	-0.260948	27.3148	0.000638908	0.00523727
57167	ENSG00000101115	SALL4	spalt like transcription factor 4	-1.11945	6.23941	29.6118	0.000650095	0.00531421
26040	ENSG00000152217	SETBP1	SET binding protein 1	1.03279	1.83103	27.0944	0.000656495	0.00536158
85397	ENSG00000135824	RGS8	regulator of G protein signaling 8	2.02955	-1.66156	27.0719	0.000658316	0.00537149
51195	ENSG00000108352	RAPGEFL1	Rap guanine nucleotide exchange factor like 1	1.42154	4.76958	29.4838	0.000659135	0.00537323
1839	ENSG00000113070	HBEGF	heparin binding EGF like growth factor	1.32265	0.615913	27.0122	0.0006632	0.00539891
123	ENSG00000147872	PLIN2	perilipin 2	-1.27799	3.51078	27.4913	0.000673596	0.00545881
7060	ENSG00000113296	THBS4	thrombospondin 4	1.32695	-0.546419	26.8588	0.000675954	0.00546504
4004	ENSG00000166407	LMO1	LIM domain only 1	2.21669	-2.03665	26.8426	0.000677314	0.00547104
51704	ENSG00000167191	GPRC5B	G protein-coupled receptor class C group 5 member B	-1.04109	2.13668	26.826	0.000678719	0.00547958
3706	ENSG00000137825	ITPKA	inositol-trisphosphate 3-kinase A	-1.08032	1.38563	26.808	0.000680241	0.00548454
57127	ENSG00000132677	RHBG	Rh family B glycoprotein	-1.43914	2.69455	27.4037	0.000680724	0.00548454
284161	ENSG00000153982	GDPD1	glycerophosphodiester phosphodiesterase domain containing 1	-1.47462	2.48979	27.2354	0.000694687	0.00556063
3761	ENSG00000168135	KCNJ4	potassium inwardly rectifying channel subfamily J member 4	-2.45309	0.0706026	26.6425	0.000694443	0.00556063
119587	ENSG00000121898	CPXM2	carboxypeptidase X, M14 family member 2	1.26805	1.15401	26.4689	0.000709749	0.00565563
9024	ENSG00000174672	BRSK2	BR serine/threonine kinase 2	-1.12069	2.72724	26.2482	0.000729802	0.00576355
101927992	ENSG00000244541	LINC01213	long intergenic non-protein coding RNA 1213	1.00906	1.23685	26.201	0.000734181	0.00577752
23632	ENSG00000118298	CA14	carbonic anhydrase 14	-1.11555	0.294305	26.1703	0.00073705	0.00578723
54626	ENSG00000069812	HES2	hes family bHLH transcription factor 2	-1.3433	3.00016	26.6122	0.000749568	0.00585954
57795	ENSG00000198797	BRINP2	BMP/retinoic acid inducible neural specific 2	1.65605	2.72335	26.54	0.00079003	0.00608186
9340	ENSG00000065325	GLP2R	glucagon like peptide 2 receptor	2.42273	-1.90606	25.4872	0.000804546	0.00615614
1959	ENSG00000122877	EGR2	early growth response 2	1.72513	-0.706939	25.4258	0.00081098	0.00618665
11309	ENSG00000137491	SLCO2B1	solute carrier organic anion transporter family member 2B1	3.83042	-2.80839	25.1817	0.000837194	0.0063105
392862	ENSG00000215045	GRID2IP	Grid2 interacting protein	-1.44689	1.41213	25.1824	0.000837112	0.0063105
53637	ENSG00000180739	S1PR5	sphingosine-1-phosphate receptor 5	-1.84684	-0.081053	25.0999	0.000846217	0.00635351
92659	ENSG00000265688	MILIP	MYC inducible lncRNA inactivating p53	-1.03885	0.638461	25.0936	0.000846908	0.00635396
100287902	ENSG00000223776	LGALS8-AS1	LGALS8 antisense RNA 1	-1.11021	0.711649	24.9819	0.000859437	0.00642076
5210	ENSG00000114268	PFKFB4	6-phosphofructo-2-kinase/fructose-2,6-biphosphatase 4	-1.83181	4.42165	27.1002	0.00086042	0.00642298
100506637	ENSG00000224424	PRKAR2A-AS1	PRKAR2A antisense RNA 1	-1.17233	0.70027	24.9188	0.000866615	0.00644902
8170	ENSG00000132874	SLC14A2	solute carrier family 14 member 2	3.05936	-2.94659	24.9166	0.000866862	0.00644902
4094	ENSG00000178573	MAF	MAF bZIP transcription factor	1.37365	1.36411	24.5886	0.000905385	0.00667114
23769	ENSG00000126500	FLRT1	fibronectin leucine rich transmembrane protein 1	1.14633	0.475905	24.5831	0.000906054	0.00667229
80896	ENSG00000135838	NPL	N-acetylneuraminate pyruvate lyase	1.18569	-0.115953	24.568	0.000907877	0.00667839
84446	ENSG00000160469	BRSK1	BR serine/threonine kinase 1	-1.26769	2.78392	24.7346	0.000950856	0.00692549
144608	ENSG00000182993	C12orf60	chromosome 12 open reading frame 60	1.00277	0.25822	24.2119	0.000952283	0.00693018
800	ENSG00000122786	CALD1	caldesmon 1	1.31447	0.868967	23.9093	0.000992139	0.00715261
123096	ENSG00000197119	SLC25A29	solute carrier family 25 member 29	-1.0808	7.25369	25.8253	0.00100002	0.00719479
100302401	ENSG00000224687	RASAL2-AS1	RASAL2 antisense RNA 1	1.82746	-1.32204	23.8152	0.00100495	0.00722145
729920	ENSG00000214960	CRPPA	CDP-L-ribitol pyrophosphorylase A	1.19407	1.07082	23.4553	0.00105588	0.00748778
9536	ENSG00000148344	PTGES	prostaglandin E synthase	1.07196	3.75323	23.6981	0.00109091	0.0076771
121506	ENSG00000139055	ERP27	endoplasmic reticulum protein 27	1.1279	-0.0748876	23.212	0.00109213	0.00768268
85360	ENSG00000105137	SYDE1	synapse defective Rho GTPase homolog 1	-1.11391	1.99112	23.1942	0.00109484	0.00769866
2925	ENSG00000126010	GRPR	gastrin releasing peptide receptor	2.8455	-1.33801	23.1376	0.00110352	0.00773521
4987	ENSG00000125510	OPRL1	opioid related nociceptin receptor 1	-1.38951	-0.413766	23.1408	0.00110303	0.00773521
8900	ENSG00000133101	CCNA1	cyclin A1	1.34361	0.686227	23.1321	0.00110436	0.00773521
9783	ENSG00000117016	RIMS3	regulating synaptic membrane exocytosis 3	-1.24656	2.30447	23.128	0.001105	0.00773521
397	ENSG00000111348	ARHGDIB	Rho GDP dissociation inhibitor beta	1.54142	-1.028	23.0577	0.00111592	0.00779732
100505812	ENSG00000268001	CARD8-AS1	CARD8 antisense RNA 1	1.08697	0.701376	22.9441	0.00113383	0.00788515
90632	ENSG00000112541	LINC00473	long intergenic non-protein coding RNA 473	1.37422	0.127104	22.9344	0.00113538	0.00789282
57451	ENSG00000145934	TENM2	teneurin transmembrane protein 2	1.93132	-1.78864	22.895	0.00114168	0.00792731
2268	ENSG00000000938	FGR	FGR proto-oncogene, Src family tyrosine kinase	4.10457	-2.64909	22.7382	0.00116723	0.0080554
8744	ENSG00000125657	TNFSF9	TNF superfamily member 9	-1.0052	0.646397	22.7371	0.00116741	0.0080554
114794	ENSG00000166897	ELFN2	extracellular leucine rich repeat and fibronectin type III domain containing 2	-1.20651	1.61413	22.7247	0.00116947	0.00806332
2046	ENSG00000070886	EPHA8	EPH receptor A8	2.28184	-1.32814	22.721	0.00117007	0.00806432
100506142	ENSG00000250116	RHOQ-AS1	RHOQ antisense RNA 1	-1.86611	0.199318	22.523	0.00120344	0.00824576
64753	ENSG00000128596	CCDC136	coiled-coil domain containing 136	-1.92364	1.95917	22.9632	0.00124852	0.00847308
3352	ENSG00000179546	HTR1D	5-hydroxytryptamine receptor 1D	-1.283	0.230314	22.2562	0.00125028	0.00848181
26166	ENSG00000132554	RGS22	regulator of G protein signaling 22	1.97787	-0.091863	22.2287	0.00125524	0.00850564
55876	ENSG00000073605	GSDMB	gasdermin B	-1.85267	1.39555	22.637	0.00126179	0.00853698
91156	ENSG00000163395	IGFN1	immunoglobulin like and fibronectin type III domain containing 1	2.34795	-2.1748	22.1566	0.00126835	0.00857483
57165	ENSG00000198835	GJC2	gap junction protein gamma 2	-1.14996	-0.254402	22.1283	0.00127355	0.00860339
79748	ENSG00000140506	LMAN1L	lectin, mannose binding 1 like	2.54473	-1.0918	22.0745	0.00128349	0.00864086
81491	ENSG00000112218	GPR63	G protein-coupled receptor 63	1.43213	-0.77802	21.8296	0.00132996	0.00887612
22983	ENSG00000105613	MAST1	microtubule associated serine/threonine kinase 1	-1.37753	2.25189	22.2161	0.0013387	0.00891105
7054	ENSG00000180176	TH	tyrosine hydroxylase	1.0922	1.6114	21.7654	0.0013425	0.0089295
79933	ENSG00000166317	SYNPO2L	synaptopodin 2 like	1.73428	-1.50697	21.7477	0.00134599	0.00894158
171220	ENSG00000290712	DSTNP2	DSTN pseudogene 2	-1.04028	1.15067	21.7376	0.00134798	0.00894576
8470	ENSG00000154556	SORBS2	sorbin and SH3 domain containing 2	2.56	-2.15621	21.5996	0.00137555	0.00907092
100130519	ENSG00000188051	TMEM221	transmembrane protein 221	-1.64946	-0.972488	21.3793	0.00142101	0.00930488
3857	ENSG00000171403	KRT9	keratin 9	3.5712	-2.03599	21.3568	0.00142576	0.00932907
10098	ENSG00000168785	TSPAN5	tetraspanin 5	1.12585	2.80448	21.3476	0.00151667	0.00975449
2299	ENSG00000168269	FOXI1	forkhead box I1	1.32328	1.5347	20.9445	0.00151634	0.00975449
4776	ENSG00000100968	NFATC4	nuclear factor of activated T cells 4	-1.43058	3.92485	22.2296	0.00158121	0.0100672
64850	ENSG00000164089	ETNPPL	ethanolamine-phosphate phospho-lyase	4.30751	-3.02295	20.581	0.00160214	0.0101494
5346	ENSG00000166819	PLIN1	perilipin 1	1.44867	-0.976219	20.5292	0.00161485	0.0102189
6101	ENSG00000104237	RP1	RP1 axonemal microtubule associated	3.10883	-2.19461	20.4519	0.00163405	0.0103109
114783	ENSG00000142235	LMTK3	lemur tyrosine kinase 3	-1.03727	3.83287	20.9393	0.00164088	0.0103446
91584	ENSG00000221866	PLXNA4	plexin A4	1.43736	3.80251	21.9557	0.00164114	0.0103446
3248	ENSG00000164120	HPGD	15-hydroxyprostaglandin dehydrogenase	2.16661	-1.31094	20.3821	0.00165163	0.0104033
100509894	ENSG00000235903	CPB2-AS1	CPB2 antisense RNA 1	1.90895	-1.87455	20.1872	0.00170199	0.0106614
199964	ENSG00000143001	TMEM61	transmembrane protein 61	-1.2048	-0.779497	20.1863	0.00170223	0.0106614
23026	ENSG00000041515	MYO16	myosin XVI	1.17106	1.51233	20.1877	0.00170185	0.0106614
100506409	ENSG00000230314	ELOVL2-AS1	ELOVL2 antisense RNA 1	3.38631	-3.09954	20.0784	0.00173093	0.0108089
25891	ENSG00000149090	PAMR1	peptidase domain containing associated with muscle regeneration 1	1.55926	-1.26537	20.0856	0.00172898	0.0108089
400660	ENSG00000266256	LINC00683	long intergenic non-protein coding RNA 683	1.11313	-0.0401956	20.0241	0.0017456	0.0108791
144195	ENSG00000173262	SLC2A14	solute carrier family 2 member 14	1.66509	1.94734	20.3661	0.00175463	0.01092
2213	ENSG00000072694	FCGR2B	Fc gamma receptor IIb	3.18283	-2.12932	19.905	0.00177831	0.0110377
3592	ENSG00000168811	IL12A	interleukin 12A	2.63729	-1.74744	19.6208	0.00185947	0.0114279
7401	ENSG00000163646	CLRN1	clarin 1	3.38296	-3.09995	19.5696	0.00187459	0.0114843
7136	ENSG00000130598	TNNI2	troponin I2, fast skeletal type	3.19102	-2.38238	19.5519	0.00187984	0.0114972
1504	ENSG00000168925	CTRB1	chymotrypsinogen B1	-1.83281	-0.698012	19.4859	0.00189961	0.0115821
219670	ENSG00000151023	ENKUR	enkurin, TRPC channel interacting protein	1.20176	-0.420782	19.4116	0.00192218	0.0116675
1116	ENSG00000133048	CHI3L1	chitinase 3 like 1	4.2074	-3.09967	19.37	0.00193494	0.0117249
80128	ENSG00000163462	TRIM46	tripartite motif containing 46	-1.39892	2.23386	19.5574	0.00198639	0.0119792
26526	ENSG00000130167	TSPAN16	tetraspanin 16	-1.92668	-1.84652	19.1535	0.00200316	0.0120639
9625	ENSG00000181409	AATK	apoptosis associated tyrosine kinase	-1.52902	2.01674	19.451	0.00201963	0.0121342
90342	ENSG00000249715	FER1L5	fer-1 like family member 5	-1.15859	-0.19722	18.9743	0.00206189	0.0123295
140828	ENSG00000259974	LINC00261	long intergenic non-protein coding RNA 261	3.15362	-2.62154	18.9441	0.002072	0.0123733
440452	ENSG00000290800	TBC1D3P2	TBC1 domain family member 3 pseudogene 2	2.4325	-1.59038	18.9288	0.00207715	0.0123999
6658	ENSG00000134595	SOX3	SRY-box transcription factor 3	1.01169	3.48211	19.2231	0.00209321	0.0124735
90993	ENSG00000157613	CREB3L1	cAMP responsive element binding protein 3 like 1	-1.3069	2.72643	19.1636	0.00211298	0.0125331
4881	ENSG00000169418	NPR1	natriuretic peptide receptor 1	1.9799	-1.07921	18.7978	0.00212183	0.0125649
388115	ENSG00000188549	CCDC9B	coiled-coil domain containing 9B	-1.32859	1.92977	18.6782	0.00223915	0.0130933
5145	ENSG00000132915	PDE6A	phosphodiesterase 6A	1.49879	0.225001	18.4256	0.00225543	0.0131494
64093	ENSG00000198732	SMOC1	SPARC related modular calcium binding 1	1.35905	-0.702458	18.3078	0.00229988	0.0133645
84665	ENSG00000138347	MYPN	myopalladin	2.83523	-2.09284	18.2092	0.00233791	0.0135241
6338	ENSG00000168447	SCNN1B	sodium channel epithelial 1 subunit beta	1.14764	2.52319	18.4892	0.00235395	0.0135895
56924	ENSG00000137843	PAK6	p21 (RAC1) activated kinase 6	-1.73151	-0.129935	18.0934	0.00238359	0.0136981
57216	ENSG00000162738	VANGL2	VANGL planar cell polarity protein 2	-1.46027	1.96508	18.3823	0.00239524	0.0137562
84627	ENSG00000225614	ZNF469	zinc finger protein 469	-1.12103	1.58616	18.0318	0.00240832	0.0138133
339488	ENSG00000116819	TFAP2E	transcription factor AP-2 epsilon	-1.24051	-0.44625	18.0057	0.00241889	0.0138515
199221	ENSG00000158163	DZIP1L	DAZ interacting zinc finger protein 1 like	1.173	-0.67019	17.7972	0.00250551	0.0141824
11155	ENSG00000122367	LDB3	LIM domain binding 3	1.38222	0.616879	17.7123	0.00254187	0.0143378
2668	ENSG00000168621	GDNF	glial cell derived neurotrophic factor	-1.30657	0.406352	17.6814	0.00255527	0.0143767
148229	ENSG00000130270	ATP8B3	ATPase phospholipid transporting 8B3	-1.33316	-1.05485	17.672	0.00255937	0.0143952
101927708	ENSG00000255367	LOC101927708	uncharacterized LOC101927708	-1.53153	-0.874777	17.6484	0.00256968	0.0144349
4969	ENSG00000106809	OGN	osteoglycin	2.19308	-1.95689	17.6247	0.00258006	0.0144748
51279	ENSG00000139178	C1RL	complement C1r subcomponent like	-1.67523	-0.204735	17.5339	0.00262043	0.0146364
374	ENSG00000109321	AREG	amphiregulin	1.3903	5.09965	18.6968	0.00263181	0.0146644
2307	ENSG00000179772	FOXS1	forkhead box S1	2.4387	-2.84386	17.4492	0.00265879	0.0147859
6752	ENSG00000180616	SSTR2	somatostatin receptor 2	3.12747	-2.90969	17.4132	0.00267527	0.014863
8038	ENSG00000148848	ADAM12	ADAM metallopeptidase domain 12	1.87312	-1.97925	17.3917	0.00268521	0.0149089
64902	ENSG00000113492	AGXT2	alanine--glyoxylate aminotransferase 2	2.77791	-2.01831	17.3181	0.0027195	0.0150615
799	ENSG00000004948	CALCR	calcitonin receptor	1.56147	-1.26142	17.2848	0.00273522	0.0151201
101927688	ENSG00000264672	SEPTIN4-AS1	SEPTIN4 antisense RNA 1	-1.09026	0.193681	17.0861	0.00283125	0.0155154
284680	ENSG00000171722	SPATA46	spermatogenesis associated 46	1.22402	0.263772	17.0801	0.00283424	0.0155222
3587	ENSG00000110324	IL10RA	interleukin 10 receptor subunit alpha	1.55999	-1.63576	16.9848	0.00288183	0.0157002
101927934	ENSG00000251169	LINC01843	long intergenic non-protein coding RNA 1843	-1.11379	-0.141827	16.9721	0.00288823	0.0157303
2524	ENSG00000176920	FUT2	fucosyltransferase 2	-1.38543	0.643944	16.9392	0.00290495	0.0157825
134285	ENSG00000157111	TMEM171	transmembrane protein 171	1.17901	-0.415691	16.9127	0.00291849	0.0158415
79365	ENSG00000123095	BHLHE41	basic helix-loop-helix family member e41	1.79833	-1.27153	16.8652	0.00294299	0.0159451
114928	ENSG00000158301	GPRASP2	G protein-coupled receptor associated sorting protein 2	-1.59311	-1.29001	16.8371	0.00295758	0.0159997
284358	ENSG00000176909	MAMSTR	MEF2 activating motif and SAP domain containing transcriptional regulator	-1.34505	0.137585	16.816	0.00296859	0.0160365
59283	ENSG00000142408	CACNG8	calcium voltage-gated channel auxiliary subunit gamma 8	-1.66481	1.28166	16.9238	0.00305945	0.0163905
9965	ENSG00000162344	FGF19	fibroblast growth factor 19	4.03549	-3.22332	16.5301	0.00312308	0.0166458
10021	ENSG00000138622	HCN4	hyperpolarization activated cyclic nucleotide gated potassium channel 4	-1.17995	1.20532	16.5126	0.00313287	0.016693
54988	ENSG00000183549	ACSM5	acyl-CoA synthetase medium chain family member 5	3.01041	-2.98512	16.2562	0.0032805	0.0172988
127294	ENSG00000142661	MYOM3	myomesin 3	3.25708	-2.80668	16.1795	0.00332635	0.0174611
79827	ENSG00000166250	CLMP	CXADR like membrane protein	1.35617	-0.870936	16.0996	0.00337496	0.0176587
402160	ENSG00000206113	CFAP99	cilia and flagella associated protein 99	1.23154	-0.41317	16.081	0.00338635	0.0176974
7066	ENSG00000090534	THPO	thrombopoietin	-1.22439	-0.537361	16.0824	0.00338551	0.0176974
27239	ENSG00000250510	GPR162	G protein-coupled receptor 162	-2.09233	-0.918726	16.0208	0.00342368	0.0178346
56144	ENSG00000204967	PCDHA4	protocadherin alpha 4	1.1081	-0.680588	15.9733	0.00345356	0.0179427
9388	ENSG00000101670	LIPG	lipase G, endothelial type	1.76682	-1.0139	15.8944	0.0035038	0.0181451
81796	ENSG00000137571	SLCO5A1	solute carrier organic anion transporter family member 5A1	1.20541	-0.956913	15.7249	0.00361491	0.0185843
23127	ENSG00000198756	COLGALT2	collagen beta(1-O)galactosyltransferase 2	1.00684	0.273325	15.7073	0.00362666	0.0186289
654	ENSG00000153162	BMP6	bone morphogenetic protein 6	1.40515	-0.630316	15.6273	0.00368084	0.0188525
9963	ENSG00000170482	SLC23A1	solute carrier family 23 member 1	-1.05478	0.82357	15.5829	0.00371128	0.01897
3764	ENSG00000121361	KCNJ8	potassium inwardly rectifying channel subfamily J member 8	-1.9588	-1.1565	15.4881	0.00377742	0.0192359
339483	ENSG00000291132	MTMR9LP	myotubularin related protein 9 like, pseudogene	-1.15846	0.844871	15.448	0.00380591	0.0193227
114897	ENSG00000173918	C1QTNF1	C1q and TNF related 1	2.9187	-2.77589	15.349	0.00387722	0.0196031
677810	ENSG00000212588	SNORA26	small nucleolar RNA, H/ACA box 26	1.42181	-1.06194	15.2567	0.00394517	0.0198672
782	ENSG00000067191	CACNB1	calcium voltage-gated channel auxiliary subunit beta 1	-1.14535	2.784	15.2913	0.00409838	0.0204642
101927318	ENSG00000257588	AQP5-AS1	AQP5 and AQP2 antisense RNA 2	-2.16942	-2.47495	15.0357	0.00411399	0.0205189
101929541	ENSG00000226251	LINC02608	long intergenic non-protein coding RNA 2608	2.25971	-2.77572	14.9753	0.00416173	0.0206988
81493	ENSG00000162520	SYNC	syncoilin, intermediate filament protein	-1.26958	-1.05759	14.9442	0.00418656	0.0207989
166348	ENSG00000187715	KBTBD12	kelch repeat and BTB domain containing 12	-2.26774	-2.78193	14.8394	0.00427151	0.0211143
158471	ENSG00000106772	PRUNE2	prune homolog 2 with BCH domain	1.41082	-0.744452	14.836	0.00427433	0.0211164
54769	ENSG00000165023	DIRAS2	DIRAS family GTPase 2	1.72143	-1.24728	14.833	0.00427679	0.0211227
343	ENSG00000103375	AQP8	aquaporin 8	2.38957	-2.7123	14.671	0.00441269	0.0216143
168620	ENSG00000180535	BHLHA15	basic helix-loop-helix family member a15	-1.29305	-0.458616	14.6485	0.00443201	0.0216777
254099	ENSG00000223823	LINC01342	long intergenic non-protein coding RNA 1342	-1.65517	-2.12659	14.6466	0.00443361	0.0216795
4821	ENSG00000125820	NKX2-2	NK2 homeobox 2	-1.17547	-0.580927	14.604	0.00447042	0.0217813
28951	ENSG00000071575	TRIB2	tribbles pseudokinase 2	-1.10309	1.37875	14.5209	0.00454335	0.0220532
51129	ENSG00000167772	ANGPTL4	angiopoietin like 4	-1.91096	2.76154	15.3045	0.00461365	0.022283
196475	ENSG00000255794	RMST	rhabdomyosarcoma 2 associated transcript	2.26673	-2.2086	14.4	0.00465216	0.0224323
4435	ENSG00000125931	CITED1	Cbp/p300 interacting transactivator with Glu/Asp rich carboxy-terminal domain 1	2.9707	-2.53865	14.3288	0.00471773	0.0227035
285382	ENSG00000187068	C3orf70	chromosome 3 open reading frame 70	2.08601	-0.633457	14.3144	0.00473116	0.0227389
283948	ENSG00000257108	NHLRC4	NHL repeat containing 4	-2.4174	-1.40134	14.2914	0.00475261	0.0228296
10077	ENSG00000064201	TSPAN32	tetraspanin 32	-1.33718	-0.0742889	14.2735	0.00476946	0.0228795
25849	ENSG00000169116	PARM1	prostate androgen-regulated mucin-like protein 1	1.02537	2.39581	14.3933	0.00481589	0.0230724
282996	ENSG00000203867	RBM20	RNA binding motif protein 20	1.46827	-0.34558	14.1101	0.0049264	0.0234923
26740	ENSG00000197233	OR1J2	olfactory receptor family 1 subfamily J member 2	-1.03314	0.54863	14.0578	0.00497804	0.0236621
155465	ENSG00000173467	AGR3	anterior gradient 3, protein disulphide isomerase family member	1.78564	-2.24565	13.9248	0.00511218	0.024157
23440	ENSG00000171540	OTP	orthopedia homeobox	1.87717	-2.02138	13.8805	0.00515797	0.0243279
28999	ENSG00000163884	KLF15	KLF transcription factor 15	1.06724	-0.818465	13.845	0.00519494	0.0244697
7461	ENSG00000106665	CLIP2	CAP-Gly domain containing linker protein 2	-1.04676	0.882171	13.7866	0.00525646	0.0247069
79927	ENSG00000197245	FAM110D	family with sequence similarity 110 member D	-1.76102	-1.57422	13.708	0.00534075	0.0250035
10332	ENSG00000104938	CLEC4M	C-type lectin domain family 4 member M	3.08221	-3.27194	13.6906	0.00535972	0.0250658
104266963	ENSG00000229630	LINC01264	long intergenic non-protein coding RNA 1264	2.10455	-2.43157	13.5835	0.00547781	0.0254657
284904	ENSG00000133488	SEC14L4	SEC14 like lipid binding 4	3.11912	-3.26876	13.583	0.00547831	0.0254657
64333	ENSG00000123329	ARHGAP9	Rho GTPase activating protein 9	2.80065	-2.62576	13.5721	0.0054906	0.0255095
340156	ENSG00000145949	MYLK4	myosin light chain kinase family member 4	1.04755	0.438533	13.5616	0.00550229	0.0255571
83758	ENSG00000139194	RBP5	retinol binding protein 5	-2.31061	-1.1102	13.5417	0.00552471	0.0256142
113730	ENSG00000130487	KLHDC7B	kelch domain containing 7B	-1.31738	2.53506	13.9174	0.00554411	0.0256772
400932	ENSG00000205634	LINC00898	long intergenic non-protein coding RNA 898	-1.23128	-0.194215	13.5172	0.00555256	0.0257096
102724919	ENSG00000229739	PDC-AS1	PDC antisense RNA 1	2.1887	-2.65293	13.4739	0.00560198	0.0258841
4909	ENSG00000225950	NTF4	neurotrophin 4	-1.5207	0.571272	13.48	0.00560973	0.0258864
100506385	ENSG00000234380	LINC01426	long intergenic non-protein coding RNA 1426	1.79904	-1.67488	13.3879	0.00570196	0.0262095
147949	ENSG00000198440	ZNF583	zinc finger protein 583	1.09369	-1.0309	13.3823	0.0057085	0.0262327
84002	ENSG00000176597	B3GNT5	UDP-GlcNAc:betaGal beta-1,3-N-acetylglucosaminyltransferase 5	-1.14918	2.83069	13.663	0.00582584	0.0266819
2294	ENSG00000103241	FOXF1	forkhead box F1	1.37836	-1.74035	13.2731	0.00583878	0.0267274
3642	ENSG00000173404	INSM1	INSM transcriptional repressor 1	1.81476	-2.29511	13.0452	0.00612263	0.0277044
57529	ENSG00000243978	RTL9	retrotransposon Gag like 9	1.54641	-0.253691	13.0393	0.00613026	0.0277128
100527978	ENSG00000271092	TLCD4-RWDD3	TLCD4-RWDD3 readthrough	-1.16763	-0.574677	13.0287	0.00614392	0.0277511
340024	ENSG00000174358	SLC6A19	solute carrier family 6 member 19	1.35304	-0.85004	12.9887	0.00619573	0.0279068
199675	ENSG00000183019	MCEMP1	mast cell expressed membrane protein 1	-1.23736	-1.49288	12.9684	0.00622223	0.0279977
9473	ENSG00000130775	THEMIS2	thymocyte selection associated family member 2	-1.94686	0.550071	13.137	0.00624174	0.0280498
9966	ENSG00000181634	TNFSF15	TNF superfamily member 15	2.40623	-2.13532	12.9222	0.00628299	0.0281994
89932	ENSG00000100767	PAPLN	papilin, proteoglycan like sulfated glycoprotein	-1.19569	0.965796	12.9191	0.00628709	0.0282035
220965	ENSG00000148541	FAM13C	family with sequence similarity 13 member C	3.35887	-3.09917	12.8651	0.00635929	0.0284384
54718	ENSG00000291104	BTN2A3P	butyrophilin subfamily 2 member A3, pseudogene	-1.31349	-0.156721	12.8085	0.00643598	0.0286883
3768	ENSG00000184185	KCNJ12	potassium inwardly rectifying channel subfamily J member 12	-1.37395	-1.83746	12.7785	0.00647704	0.0288292
56154	ENSG00000133863	TEX15	testis expressed 15, meiosis and synapsis associated	2.1982	-2.65711	12.7761	0.0064804	0.0288369
4858	ENSG00000104967	NOVA2	NOVA alternative splicing regulator 2	-2.67457	-0.337532	12.9387	0.00650285	0.0289077
388165	ENSG00000291027	UBE2Q2P1	UBE2Q2 pseudogene 1	-1.00078	1.79928	12.7385	0.00653235	0.0290025
102238594	ENSG00000269959	SPACA6-AS1	SPACA6 antisense RNA 1	-1.54508	1.52202	12.9038	0.00655022	0.0290645
56923	ENSG00000132911	NMUR2	neuromedin U receptor 2	4.15371	-3.14229	12.7102	0.00657182	0.0291411
401093	ENSG00000229619	MBNL1-AS1	MBNL1 antisense RNA 1	1.08771	0.253583	12.6154	0.00670624	0.0295816
53405	ENSG00000112782	CLIC5	chloride intracellular channel 5	2.8512	-2.6226	12.5802	0.00675706	0.0297169
116362	ENSG00000162444	RBP7	retinol binding protein 7	1.58731	-0.528326	12.5593	0.00678752	0.0298139
400084	ENSG00000249267	LINC00939	long intergenic non-protein coding RNA 939	-2.0633	-1.21276	12.5055	0.00686648	0.0300438
5596	ENSG00000141639	MAPK4	mitogen-activated protein kinase 4	1.26508	0.00645247	12.4669	0.00692389	0.03028
845	ENSG00000118729	CASQ2	calsequestrin 2	1.62537	-1.3836	12.4372	0.00696834	0.0304045
6492	ENSG00000112246	SIM1	SIM bHLH transcription factor 1	-1.62666	-1.59617	12.3965	0.00703006	0.0306059
284716	ENSG00000177181	RIMKLA	ribosomal modification protein rimK like family member A	-1.09992	1.84948	12.4742	0.00707566	0.0307586
100289211	ENSG00000278811	LINC00624	long intergenic non-protein coding RNA 624	2.4355	-2.2494	12.29	0.00719456	0.0311155
100874188	ENSG00000223685	LINC00571	long intergenic non-protein coding RNA 571	1.26751	-1.14402	12.2905	0.00719372	0.0311155
55001	ENSG00000006555	TTC22	tetratricopeptide repeat domain 22	-1.05279	-0.22604	12.2837	0.00720437	0.0311351
4613	ENSG00000134323	MYCN	MYCN proto-oncogene, bHLH transcription factor	-1.04987	-0.178114	12.2362	0.00727949	0.0313755
347454	ENSG00000187808	SOWAHD	sosondowah ankyrin repeat domain family member D	-1.16338	-0.534305	12.2123	0.00731756	0.0315052
112616	ENSG00000153551	CMTM7	CKLF like MARVEL transmembrane domain containing 7	1.13366	-1.20502	12.1611	0.0074	0.0317481
256710	ENSG00000173401	GLIPR1L1	GLIPR1 like 1	-1.49526	-2.04644	12.1422	0.00743089	0.0318479
25907	ENSG00000249992	TMEM158	transmembrane protein 158	1.71233	-1.5305	12.0592	0.00756781	0.0323192
57559	ENSG00000138134	STAMBPL1	STAM binding protein like 1	2.07489	-2.59671	12.0555	0.00757393	0.0323227
162417	ENSG00000161653	NAGS	N-acetylglutamate synthase	-1.02888	-0.0161273	12.009	0.00765203	0.0325533
79098	ENSG00000182795	C1orf116	chromosome 1 open reading frame 116	1.59915	-1.76637	11.9765	0.00770728	0.0327333
3833	ENSG00000056678	KIFC1	kinesin family member C1	-2.16907	-2.21569	11.9479	0.00775623	0.032886
51557	ENSG00000146166	LGSN	lengsin, lens protein with glutamine synthetase domain	1.14397	-0.153731	11.9325	0.00778289	0.0329674
165530	ENSG00000152672	CLEC4F	C-type lectin domain family 4 member F	-1.99193	-2.19344	11.781	0.00805008	0.0338
10335	ENSG00000072952	IRAG1	inositol 1,4,5-triphosphate receptor associated 1	1.51701	-1.85692	11.7486	0.00810874	0.034014
400548	ENSG00000278214	LINC02139	long intergenic non-protein coding RNA 2139	2.62136	-2.39192	11.7234	0.00815461	0.0341633
440387	ENSG00000168928	CTRB2	chymotrypsinogen B2	-1.15926	-0.949972	11.7227	0.00815589	0.0341633
441168	ENSG00000188820	CALHM6	calcium homeostasis modulator family member 6	1.09623	-0.891702	11.7121	0.00817541	0.034237
57168	ENSG00000128203	ASPHD2	aspartate beta-hydroxylase domain containing 2	-1.04759	-0.374741	11.6796	0.00823536	0.0344226
11009	ENSG00000162892	IL24	interleukin 24	4.31805	-2.99005	11.6454	0.00829902	0.0346154
57413	ENSG00000121933	TMIGD3	transmembrane and immunoglobulin domain containing 3	3.24646	-3.18564	11.5849	0.00841305	0.0350106
102724550	ENSG00000231574	LINC02015	long intergenic non-protein coding RNA 2015	1.31577	-1.08142	11.569	0.00844338	0.0350706
7200	ENSG00000170893	TRH	thyrotropin releasing hormone	1.77176	-2.43738	11.5698	0.00844181	0.0350706
284344	ENSG00000241104	LOC284344	uncharacterized LOC284344	1.85678	-2.20134	11.5324	0.00851379	0.035262
118932	ENSG00000152766	ANKRD22	ankyrin repeat domain 22	2.70783	-2.45711	11.4849	0.00860608	0.0355943
92340	ENSG00000224383	PRR29	proline rich 29	-1.3128	-0.619745	11.4434	0.00868781	0.0358152
283345	ENSG00000240370	RPL13P5	ribosomal protein L13 pseudogene 5	-1.08715	-0.246586	11.394	0.00878629	0.0361035
8842	ENSG00000007062	PROM1	prominin 1	1.478	-1.98135	11.3342	0.0089074	0.0365164
11063	ENSG00000039600	SOX30	SRY-box transcription factor 30	2.29284	-1.61138	11.3123	0.00895213	0.0366073
80339	ENSG00000100344	PNPLA3	patatin like phospholipase domain containing 3	1.52196	-1.02947	11.302	0.00897336	0.0366595
6707	ENSG00000163209	SPRR3	small proline rich protein 3	1.06138	-1.24923	11.3008	0.00897586	0.0366613
100874074	ENSG00000176124	DLEU7-AS1	DLEU7 antisense RNA 1	1.85573	-2.03974	11.2492	0.00908294	0.0370047
253827	ENSG00000174099	MSRB3	methionine sulfoxide reductase B3	1.28619	-1.49653	11.2323	0.00911852	0.037107
1102	ENSG00000136161	RCBTB2	RCC1 and BTB domain containing protein 2	1.02987	0.270172	11.2072	0.00917136	0.0372706
285498	ENSG00000178222	RNF212	ring finger protein 212	-3.77279	-3.23112	11.1915	0.00920467	0.0373545
7980	ENSG00000105825	TFPI2	tissue factor pathway inhibitor 2	1.07269	0.158817	11.1704	0.00924978	0.0374861
57526	ENSG00000165194	PCDH19	protocadherin 19	1.36879	0.513688	11.1643	0.0092627	0.0375212
1380	ENSG00000117322	CR2	complement C3d receptor 2	1.86722	-2.48672	11.1439	0.0093066	0.0376396
642843	ENSG00000187959	CPSF4L	cleavage and polyadenylation specific factor 4 like	-1.54484	-1.50537	11.1308	0.00933491	0.0377188
317671	ENSG00000175449	RFESD	Rieske Fe-S domain containing	1.10787	0.225947	11.1229	0.00935204	0.0377708
54064	ENSG00000230978	LINC00160	long intergenic non-protein coding RNA 160	2.32443	-2.19777	11.0854	0.00943385	0.0380318
401097	ENSG00000180044	C3orf80	chromosome 3 open reading frame 80	1.48558	-0.985523	11.081	0.00944359	0.0380624
57205	ENSG00000145246	ATP10D	ATPase phospholipid transporting 10D (putative)	1.11743	-0.35189	11.0642	0.00948056	0.0381593
84793	ENSG00000237424	FOXD2-AS1	FOXD2 adjacent opposite strand RNA 1	-1.13339	-0.0842339	11.0596	0.00949072	0.0381915
641700	ENSG00000249751	ECSCR	endothelial cell surface expressed chemotaxis and apoptosis regulator	-2.84391	-2.91316	11.0373	0.00954007	0.0383378
6330	ENSG00000177098	SCN4B	sodium voltage-gated channel beta subunit 4	1.14614	-1.01045	10.9617	0.00971	0.0388883
79642	ENSG00000180801	ARSJ	arylsulfatase family member J	1.12771	-0.438487	10.9072	0.0098349	0.0392908
54106	ENSG00000239732	TLR9	toll like receptor 9	-1.91755	-2.27174	10.7506	0.010205	0.0405021
116441	ENSG00000163762	TM4SF18	transmembrane 4 L six family member 18	-1.70862	2.16617	11.1517	0.0104842	0.0413071
84815	ENSG00000266709	MGC12916	uncharacterized protein MGC12916	1.39595	-1.59885	10.6051	0.0105645	0.0415769
114819	ENSG00000080947	CROCCP3	CROCC pseudogene 3	-1.03125	2.32711	10.7036	0.0106456	0.0418145
1592	ENSG00000095596	CYP26A1	cytochrome P450 family 26 subfamily A member 1	1.41109	0.076466	10.5563	0.0106884	0.0419061
84734	ENSG00000183615	FAM167B	family with sequence similarity 167 member B	-1.25711	-0.9966	10.5221	0.0107764	0.0421636
121838	ENSG00000233725	NRAD1	non-coding RNA in the aldehyde dehydrogenase 1A pathway	1.38554	-2.13999	10.4603	0.0109379	0.0425827
6288	ENSG00000173432	SAA1	serum amyloid A1	1.05092	-0.712748	10.4323	0.0110118	0.0428047
9068	ENSG00000116194	ANGPTL1	angiopoietin like 1	-1.55412	-1.93388	10.3853	0.0111377	0.0432085
7276	ENSG00000118271	TTR	transthyretin	2.88999	-3.06395	10.304	0.0113594	0.0437872
81706	ENSG00000198729	PPP1R14C	protein phosphatase 1 regulatory inhibitor subunit 14C	1.20753	-1.16969	10.2761	0.011437	0.0440033
255738	ENSG00000169174	PCSK9	proprotein convertase subtilisin/kexin type 9	1.94785	-2.94869	10.2528	0.0115021	0.0441674
100130827	ENSG00000231274	SBK3	SH3 domain binding kinase family member 3	-1.43457	-1.17956	10.2422	0.0115317	0.0442333
10044	ENSG00000095370	SH2D3C	SH2 domain containing 3C	1.29057	-1.37898	10.1992	0.0116534	0.0445842
101929563	ENSG00000283982	LOC101929563	uncharacterized LOC101929563	1.61626	-1.98091	10.1945	0.0116668	0.0446162
80008	ENSG00000121895	TMEM156	transmembrane protein 156	2.31913	-1.94228	10.1213	0.0118782	0.0452096
645700	ENSG00000291037	ZNF890P	zinc finger protein 890, pseudogene	-1.82328	-2.04018	10.1194	0.0118838	0.0452212
90134	ENSG00000184611	KCNH7	potassium voltage-gated channel subfamily H member 7	1.84183	-2.87841	10.0638	0.0120475	0.045662
100505576	ENSG00000263874	LASP1NB	LASP1 neighbor	-1.09671	-0.386219	10.0415	0.0121141	0.0458612
151651	ENSG00000163576	EFHB	EF-hand domain family member B	-1.08186	-1.29675	10.0213	0.0121746	0.0460115
5745	ENSG00000160801	PTH1R	parathyroid hormone 1 receptor	1.45932	-0.750786	10.0068	0.0122185	0.046104
793	ENSG00000104327	CALB1	calbindin 1	2.00158	-1.63688	10.0063	0.0122199	0.046104
11199	ENSG00000109511	ANXA10	annexin A10	-1.43775	-1.87954	9.99268	0.0122613	0.0462009
133584	ENSG00000164318	EGFLAM	EGF like, fibronectin type III and laminin G domains	1.72582	-2.35755	9.96726	0.0123388	0.0464041
84439	ENSG00000182218	HHIPL1	HHIP like 1	-1.00027	-0.870944	9.90886	0.0125191	0.0468634
29943	ENSG00000142623	PADI1	peptidyl arginine deiminase 1	1.6654	-1.82738	9.84102	0.0127328	0.0475024
168667	ENSG00000164619	BMPER	BMP binding endothelial regulator	1.92877	-2.66031	9.76831	0.0129668	0.0481524
643904	ENSG00000189051	RNF222	ring finger protein 222	1.33922	-1.7283	9.75241	0.0130187	0.0482944
162494	ENSG00000141314	RHBDL3	rhomboid like 3	-1.41416	-0.782585	9.72975	0.0130931	0.0485399
131669	ENSG00000159650	UROC1	urocanate hydratase 1	2.70834	-3.14043	9.70641	0.0131703	0.048775
81035	ENSG00000158270	COLEC12	collectin subfamily member 12	1.41107	-1.16762	9.6966	0.0132029	0.0488447
653333	ENSG00000145002	FAM86B2	family with sequence similarity 86 member B2	1.56496	-1.71561	9.64756	0.0133674	0.0492578
462	ENSG00000117601	SERPINC1	serpin family C member 1	2.16724	-2.98588	9.64359	0.0133809	0.0492955
100616469	ENSG00000264010	MIR4429	microRNA 4429	2.69279	-2.87743	9.61985	0.0134615	0.0495324
100652740	ENSG00000261359	PYCARD-AS1	PYCARD antisense RNA 1	-1.06595	-0.7185	9.58574	0.0135785	0.0498385

## Sheet: All expressed genes
ENTREZ ID	ENSEMBL	Gene Symbol	Gene Name	lgFC	logCPM	F	p-value	FDR
11098	ENSG00000150687	PRSS23	serine protease 23	1.58661	5.668	731.122	1.35e-09	3.99e-06
1836	ENSG00000155850	SLC26A2	solute carrier family 26 member 2	2.08118	6.49683	972.97	4.02e-10	3.99e-06
26353	ENSG00000152137	HSPB8	heat shock protein family B (small) member 8	1.66984	7.48882	741.364	1.28e-09	3.99e-06
6297	ENSG00000165821	SALL2	spalt like transcription factor 2	-2.54347	4.79247	859.625	6.81e-10	3.99e-06
861	ENSG00000159216	RUNX1	RUNX family transcription factor 1	1.66086	6.04549	774.569	1.06e-09	3.99e-06
8645	ENSG00000164626	KCNK5	potassium two pore domain channel subfamily K member 5	2.66308	3.91283	797.857	9.34e-10	3.99e-06
22822	ENSG00000139289	PHLDA1	pleckstrin homology like domain family A member 1	1.63238	6.4411	623.558	2.65e-09	4.7e-06
283578	ENSG00000100580	TMED8	transmembrane p24 trafficking protein family member 8	1.29473	7.1645	665.198	2.02e-09	4.7e-06
6584	ENSG00000197375	SLC22A5	solute carrier family 22 member 5	1.43727	5.73411	624.576	2.64e-09	4.7e-06
7039	ENSG00000163235	TGFA	transforming growth factor alpha	2.16236	3.78289	630.206	2.54e-09	4.7e-06
4886	ENSG00000164128	NPY1R	neuropeptide Y receptor Y1	1.62862	7.25831	605.647	3e-09	4.83e-06
23223	ENSG00000052749	RRP12	ribosomal RNA processing 12 homolog	1.30649	6.05166	588.114	3.4e-09	5.02e-06
94241	ENSG00000164938	TP53INP1	tumor protein p53 inducible nuclear protein 1	-1.2503	6.60035	568.874	3.91e-09	5.33e-06
23670	ENSG00000135048	CEMIP2	cell migration inducing hyaluronidase 2	1.34596	6.88642	495.25	7.03e-09	6.06e-06
24147	ENSG00000179431	FJX1	four-jointed box kinase 1	1.67506	4.60775	511.146	6.15e-09	6.06e-06
342184	ENSG00000248905	FMN1	formin 1	1.75917	4.53812	492.638	7.18e-09	6.06e-06
3754	ENSG00000162975	KCNF1	potassium voltage-gated channel modifier subfamily F member 1	2.69159	2.99462	530.899	5.24e-09	6.06e-06
6840	ENSG00000197321	SVIL	supervillin	1.08951	7.55588	502.947	6.58e-09	6.06e-06
771	ENSG00000074410	CA12	carbonic anhydrase 12	1.30384	8.95744	521.788	5.64e-09	6.06e-06
79929	ENSG00000180834	MAP6D1	MAP6 domain containing 1	1.66897	4.80003	494.301	7.08e-09	6.06e-06
9687	ENSG00000196208	GREB1	growth regulating estrogen receptor binding 1	1.3797	8.94701	495.346	7.02e-09	6.06e-06
25976	ENSG00000163659	TIPARP	TCDD inducible poly(ADP-ribose) polymerase	1.49162	5.58355	439.352	1.16e-08	9.36e-06
2274	ENSG00000115641	FHL2	four and a half LIM domains 2	2.1602	3.66158	430.949	1.26e-08	9.72e-06
7074	ENSG00000156299	TIAM1	TIAM Rac1 associated GEF 1	1.544	4.72674	418.74	1.42e-08	1.05e-05
25929	ENSG00000082516	GEMIN5	gem nuclear organelle associated protein 5	1.12266	6.32613	404.853	1.64e-08	1.13e-05
55672	ENSG00000219481	NBPF1	NBPF member 1	1.24912	5.35189	403.615	1.66e-08	1.13e-05
55672	ENSG00000292225	NBPF1	NBPF member 1	1.24912	5.35189	403.615	1.66e-08	1.13e-05
23286	ENSG00000113645	WWC1	WW and C2 domain containing 1	1.17017	6.97106	388.25	1.96e-08	1.17e-05
57493	ENSG00000173706	HEG1	heart development protein with EGF like domains 1	3.19526	3.63973	392.527	1.87e-08	1.17e-05
8000	ENSG00000167653	PSCA	prostate stem cell antigen	-2.27324	3.25236	394.167	1.84e-08	1.17e-05
94122	ENSG00000147041	SYTL5	synaptotagmin like 5	1.46381	4.41837	387.315	1.98e-08	1.17e-05
9619	ENSG00000160179	ABCG1	ATP binding cassette subfamily G member 1	-1.05936	6.51214	371.48	2.36e-08	1.35e-05
10885	ENSG00000065183	WDR3	WD repeat domain 3	1.28221	6.41396	354.474	2.87e-08	1.59e-05
5241	ENSG00000082175	PGR	progesterone receptor	2.49977	4.79626	348.102	3.09e-08	1.66e-05
9181	ENSG00000116584	ARHGEF2	Rho/Rac guanine nucleotide exchange factor 2	-1.12868	5.65246	345.183	3.2e-08	1.67e-05
113230	ENSG00000141854	MISP3	MISP family member 3	-1.36801	4.86665	338.293	3.49e-08	1.67e-05
113230	ENSG00000288191	MISP3	MISP family member 3	-1.36801	4.86665	338.293	3.49e-08	1.67e-05
257364	ENSG00000173548	SNX33	sorting nexin 33	-1.1717	4.78541	338.118	3.49e-08	1.67e-05
90427	ENSG00000104081	BMF	Bcl2 modifying factor	-1.2968	4.62201	342.527	3.31e-08	1.67e-05
7168	ENSG00000140416	TPM1	tropomyosin 1	0.871485	7.59946	333.601	3.7e-08	1.72e-05
23657	ENSG00000151012	SLC7A11	solute carrier family 7 member 11	1.58213	4.65625	330.818	3.83e-08	1.74e-05
80324	ENSG00000177192	PUS1	pseudouridine synthase 1	1.3158	5.80637	327.079	4.02e-08	1.74e-05
860	ENSG00000124813	RUNX2	RUNX family transcription factor 2	1.40134	4.33466	326.954	4.02e-08	1.74e-05
220992	ENSG00000198298	ZNF485	zinc finger protein 485	1.48361	3.80452	322.285	4.27e-08	1.8e-05
55809	ENSG00000124496	TRERF1	transcriptional regulating factor 1	-1.6421	5.95144	319.366	4.44e-08	1.83e-05
4773	ENSG00000101096	NFATC2	nuclear factor of activated T cells 2	1.09646	5.86522	309.413	5.06e-08	1.84e-05
55565	ENSG00000102984	ZNF821	zinc finger protein 821	-1.53641	4.3874	309.19	5.08e-08	1.84e-05
65059	ENSG00000173166	RAPH1	Ras association (RalGDS/AF-6) and pleckstrin homology domains 1	-0.914211	7.61799	316.262	4.62e-08	1.84e-05
8165	ENSG00000121057	AKAP1	A-kinase anchoring protein 1	0.859174	7.55384	313.256	4.81e-08	1.84e-05
9203	ENSG00000147130	ZMYM3	zinc finger MYM-type containing 3	-1.14439	5.57106	311.768	4.91e-08	1.84e-05
9846	ENSG00000033327	GAB2	GRB2 associated binding protein 2	1.04653	5.68017	314.752	4.72e-08	1.84e-05
27202	ENSG00000134830	C5AR2	complement C5a receptor 2	1.44039	3.71963	305.991	5.31e-08	1.84e-05
65083	ENSG00000165271	NOL6	nucleolar protein 6	0.978959	5.95183	306.556	5.27e-08	1.84e-05
54517	ENSG00000091127	PUS7	pseudouridine synthase 7	0.950718	6.15942	301.672	5.63e-08	1.85e-05
56919	ENSG00000005100	DHX33	DEAH-box helicase 33	0.942272	6.19849	301.439	5.65e-08	1.85e-05
79754	ENSG00000196372	ASB13	ankyrin repeat and SOCS box containing 13	0.996505	5.69595	301.919	5.61e-08	1.85e-05
164832	ENSG00000170500	LONRF2	LON peptidase N-terminal domain and ring finger 2	1.31167	6.67931	299.955	5.77e-08	1.86e-05
4603	ENSG00000185697	MYBL1	MYB proto-oncogene like 1	2.48293	6.32073	317.244	5.98e-08	1.89e-05
23007	ENSG00000114805	PLCH1	phospholipase C eta 1	-1.25985	4.40661	294.515	6.22e-08	1.92e-05
51559	ENSG00000111696	NT5DC3	5'-nucleotidase domain containing 3	1.68062	3.89661	293.202	6.34e-08	1.92e-05
5979	ENSG00000165731	RET	ret proto-oncogene	1.68763	6.59045	292.544	6.4e-08	1.92e-05
2296	ENSG00000054598	FOXC1	forkhead box C1	2.12312	4.85174	290.212	6.62e-08	1.95e-05
2669	ENSG00000164949	GEM	GTP binding protein overexpressed in skeletal muscle	1.94152	3.19456	287.576	6.88e-08	2e-05
10614	ENSG00000186834	HEXIM1	HEXIM P-TEFb complex subunit 1	-0.965334	6.32541	284.289	7.21e-08	2.02e-05
3487	ENSG00000141753	IGFBP4	insulin like growth factor binding protein 4	1.12366	8.03214	282.603	7.39e-08	2.02e-05
399665	ENSG00000167106	EEIG1	estrogen-induced osteoclastogenesis regulator 1	0.865262	8.49286	282.108	7.45e-08	2.02e-05
7464	ENSG00000106789	CORO2A	coronin 2A	-1.26058	4.83614	283.457	7.3e-08	2.02e-05
9886	ENSG00000072422	RHOBTB1	Rho related BTB domain containing 1	1.55846	5.40539	281.368	7.53e-08	2.02e-05
1802	ENSG00000132768	DPH2	diphthamide biosynthesis 2	1.03419	5.15306	276.105	8.15e-08	2.15e-05
84172	ENSG00000125630	POLR1B	RNA polymerase I subunit B	0.952936	6.8077	274.107	8.4e-08	2.17e-05
9188	ENSG00000165732	DDX21	DExD-box helicase 21	1.0681	8.42916	273.77	8.44e-08	2.17e-05
115708	ENSG00000166166	TRMT61A	tRNA methyltransferase 61A	1.01525	5.32622	271.584	8.73e-08	2.18e-05
9569	ENSG00000006704	GTF2IRD1	GTF2I repeat domain containing 1	-1.76279	5.28114	272.17	8.65e-08	2.18e-05
80746	ENSG00000154743	TSEN2	tRNA splicing endonuclease subunit 2	1.15679	4.98504	267.976	9.23e-08	2.27e-05
254778	ENSG00000169085	VXN	vexin	3.05312	3.31653	265.184	9.64e-08	2.3e-05
2626	ENSG00000136574	GATA4	GATA binding protein 4	3.86567	0.615914	263.518	9.89e-08	2.3e-05
2626	ENSG00000285109	GATA4	GATA binding protein 4	3.86567	0.615914	263.518	9.89e-08	2.3e-05
7057	ENSG00000137801	THBS1	thrombospondin 1	1.07497	8.05028	264.531	9.74e-08	2.3e-05
794	ENSG00000172137	CALB2	calbindin 2	3.09235	1.03234	262.927	9.99e-08	2.3e-05
794	ENSG00000282830	CALB2	calbindin 2	3.09235	1.03234	262.927	9.99e-08	2.3e-05
8463	ENSG00000074219	TEAD2	TEA domain transcription factor 2	-0.916537	5.74768	265.22	9.63e-08	2.3e-05
157285	ENSG00000275342	PRAG1	PEAK1 related, kinase-activating pseudokinase 1	1.14572	5.89015	258.715	1.07e-07	2.42e-05
157285	ENSG00000292308	PRAG1	PEAK1 related, kinase-activating pseudokinase 1	1.14572	5.89015	258.715	1.07e-07	2.42e-05
221662	ENSG00000112183	RBM24	RNA binding motif protein 24	2.35305	4.31058	257.508	1.09e-07	2.44e-05
9645	ENSG00000133816	MICAL2	microtubule associated monooxygenase, calponin and LIM domain containing 2	1.08149	4.54117	255.899	1.12e-07	2.47e-05
51317	ENSG00000135365	PHF21A	PHD finger protein 21A	-1.35871	5.04135	254.708	1.14e-07	2.49e-05
705	ENSG00000112578	BYSL	bystin like	1.02496	5.63075	251.36	1.2e-07	2.6e-05
1628	ENSG00000105516	DBP	D-box binding PAR bZIP transcription factor	-1.48188	4.7463	249.07	1.25e-07	2.61e-05
4839	ENSG00000111641	NOP2	NOP2 nucleolar protein	0.921607	5.47189	250.147	1.23e-07	2.61e-05
7052	ENSG00000198959	TGM2	transglutaminase 2	3.78095	1.65204	249.614	1.24e-07	2.61e-05
57478	ENSG00000103404	USP31	ubiquitin specific peptidase 31	0.989602	6.27485	246.034	1.32e-07	2.69e-05
93129	ENSG00000175938	ORAI3	ORAI calcium release-activated calcium modulator 3	-0.856997	5.71615	245.677	1.32e-07	2.69e-05
168544	ENSG00000181444	ZNF467	zinc finger protein 467	-1.1976	6.40922	243.931	1.36e-07	2.71e-05
23082	ENSG00000148840	PPRC1	PPARG related coactivator 1	0.878339	6.19987	243.422	1.38e-07	2.71e-05
5097	ENSG00000156453	PCDH1	protocadherin 1	-1.45321	4.84665	243.812	1.37e-07	2.71e-05
5465	ENSG00000186951	PPARA	peroxisome proliferator activated receptor alpha	-1.28016	3.87804	241.157	1.43e-07	2.78e-05
10740	NA	RFPL1S	RFPL1 antisense RNA 1	3.61063	0.589182	237.786	1.52e-07	2.87e-05
55127	ENSG00000119285	HEATR1	HEAT repeat containing 1	0.838156	6.74689	237.835	1.51e-07	2.87e-05
6478	ENSG00000181788	SIAH2	siah E3 ubiquitin protein ligase 2	1.4095	7.67535	237.543	1.52e-07	2.87e-05
26287	ENSG00000165887	ANKRD2	ankyrin repeat domain 2	3.60842	0.732512	236.598	1.55e-07	2.89e-05
25865	ENSG00000105287	PRKD2	protein kinase D2	-1.10884	5.95399	234.289	1.61e-07	2.97e-05
3055	ENSG00000101336	HCK	HCK proto-oncogene, Src family tyrosine kinase	3.21822	1.4931	230.931	1.71e-07	3.12e-05
6875	ENSG00000141384	TAF4B	TATA-box binding protein associated factor 4b	1.4867	4.52265	230.344	1.73e-07	3.13e-05
54549	ENSG00000069188	SDK2	sidekick cell adhesion molecule 2	2.20721	3.00048	227.744	1.81e-07	3.2e-05
6397	ENSG00000129657	SEC14L1	SEC14 like lipid binding 1	-0.908	5.97057	227.555	1.82e-07	3.2e-05
7022	ENSG00000087510	TFAP2C	transcription factor AP-2 gamma	0.762844	7.47666	227.388	1.82e-07	3.2e-05
317	ENSG00000120868	APAF1	apoptotic peptidase activating factor 1	-1.22842	4.53935	224.982	1.91e-07	3.31e-05
2050	ENSG00000196411	EPHB4	EPH receptor B4	-0.84128	7.73294	222.146	2.01e-07	3.4e-05
29995	ENSG00000071282	LMCD1	LIM and cysteine rich domains 1	1.60546	5.0315	221.982	2.02e-07	3.4e-05
9875	ENSG00000142207	URB1	URB1 ribosome biogenesis homolog	0.818575	6.15623	222.269	2.01e-07	3.4e-05
10528	ENSG00000101361	NOP56	NOP56 ribonucleoprotein	0.805193	7.0937	219.066	2.13e-07	3.45e-05
140685	ENSG00000130584	ZBTB46	zinc finger and BTB domain containing 46	-1.16252	4.61508	218.744	2.14e-07	3.45e-05
149175	ENSG00000185090	MANEAL	mannosidase endo-alpha like	0.822818	5.35979	218.746	2.14e-07	3.45e-05
4143	ENSG00000151224	MAT1A	methionine adenosyltransferase 1A	2.85563	1.92394	218.703	2.14e-07	3.45e-05
63035	ENSG00000085185	BCORL1	BCL6 corepressor like 1	-2.08666	4.6653	220.314	2.08e-07	3.45e-05
56652	ENSG00000107815	TWNK	twinkle mtDNA helicase	1.22401	5.52452	217.359	2.2e-07	3.51e-05
23212	ENSG00000179041	RRS1	ribosome biogenesis regulator 1 homolog	1.46959	6.2459	214.317	2.33e-07	3.64e-05
3860	ENSG00000171401	KRT13	keratin 13	4.17099	0.584661	214.172	2.34e-07	3.64e-05
6541	ENSG00000139514	SLC7A1	solute carrier family 7 member 1	0.740736	7.99916	213.981	2.35e-07	3.64e-05
1591	ENSG00000019186	CYP24A1	cytochrome P450 family 24 subfamily A member 1	3.60696	1.45867	212.13	2.43e-07	3.75e-05
11031	ENSG00000168461	RAB31	RAB31, member RAS oncogene family	0.920957	6.27374	208.435	2.62e-07	3.77e-05
1303	ENSG00000111799	COL12A1	collagen type XII alpha 1 chain	1.4713	6.06715	209.859	2.54e-07	3.77e-05
1736	ENSG00000130826	DKC1	dyskerin pseudouridine synthase 1	1.07635	7.26186	210.422	2.52e-07	3.77e-05
23508	ENSG00000133985	TTC9	tetratricopeptide repeat domain 9	-0.83381	5.3609	210.118	2.53e-07	3.77e-05
2624	ENSG00000179348	GATA2	GATA binding protein 2	-0.827951	5.33723	210.528	2.51e-07	3.77e-05
55890	ENSG00000170412	GPRC5C	G protein-coupled receptor class C group 5 member C	-0.894984	5.34685	208.795	2.6e-07	3.77e-05
55890	ENSG00000291917	GPRC5C	G protein-coupled receptor class C group 5 member C	-0.894984	5.34685	208.795	2.6e-07	3.77e-05
64434	ENSG00000146909	NOM1	nucleolar protein with MIF4G domain 1	0.829409	6.03198	209.077	2.58e-07	3.77e-05
9480	ENSG00000119547	ONECUT2	one cut homeobox 2	1.05356	5.03255	209.637	2.55e-07	3.77e-05
9516	ENSG00000189067	LITAF	lipopolysaccharide induced TNF factor	-0.676853	7.21971	205.859	2.75e-07	3.93e-05
18	ENSG00000183044	ABAT	4-aminobutyrate aminotransferase	0.908924	8.23159	205.425	2.78e-07	3.93e-05
8202	ENSG00000124151	NCOA3	nuclear receptor coactivator 3	-0.828189	11.1803	204.441	2.83e-07	3.98e-05
2355	ENSG00000075426	FOSL2	FOS like 2, AP-1 transcription factor subunit	0.982405	7.50839	203.313	2.9e-07	4.01e-05
54498	ENSG00000088826	SMOX	spermine oxidase	1.46673	2.84773	203.559	2.88e-07	4.01e-05
57659	ENSG00000174282	ZBTB4	zinc finger and BTB domain containing 4	-0.740666	6.67128	202.212	2.96e-07	4.07e-05
57659	ENSG00000283868	ZBTB4	zinc finger and BTB domain containing 4	-0.740666	6.67128	202.212	2.96e-07	4.07e-05
27042	ENSG00000117597	UTP25	UTP25 small subunit processome component	0.984604	4.78133	199.977	3.1e-07	4.21e-05
63977	ENSG00000141956	PRDM15	PR/SET domain 15	0.913045	4.96827	199.781	3.12e-07	4.21e-05
11037	ENSG00000243244	STON1	stonin 1	-1.87792	2.54242	197.075	3.3e-07	4.33e-05
54906	ENSG00000108021	TASOR2	transcription activation suppressor family member 2	0.95418	8.04768	197.391	3.27e-07	4.33e-05
56920	ENSG00000010319	SEMA3G	semaphorin 3G	3.52438	1.09631	196.908	3.31e-07	4.33e-05
57648	ENSG00000162522	NHSL3	NHS like 3	-0.693203	7.3927	196.548	3.33e-07	4.33e-05
5916	ENSG00000172819	RARG	retinoic acid receptor gamma	-0.79656	6.87637	197.536	3.26e-07	4.33e-05
6821	ENSG00000139531	SUOX	sulfite oxidase	-0.884899	5.02371	196.263	3.35e-07	4.33e-05
7067	ENSG00000126351	THRA	thyroid hormone receptor alpha	-1.08466	3.80137	195.465	3.41e-07	4.37e-05
10125	ENSG00000172575	RASGRP1	RAS guanyl releasing protein 1	2.30635	5.72054	205.449	3.5e-07	4.46e-05
7477	ENSG00000188064	WNT7B	Wnt family member 7B	-0.749805	5.80267	193.813	3.53e-07	4.47e-05
158046	ENSG00000130045	NXNL2	nucleoredoxin like 2	1.92242	3.39312	193.106	3.58e-07	4.5e-05
158046	ENSG00000291520	NXNL2	nucleoredoxin like 2	1.92242	3.39312	193.106	3.58e-07	4.5e-05
26018	ENSG00000144749	LRIG1	leucine rich repeats and immunoglobulin like domains 1	0.98936	6.08731	192.217	3.65e-07	4.56e-05
23160	ENSG00000163811	WDR43	WD repeat domain 43	1.01977	7.18397	191.699	3.69e-07	4.57e-05
5174	ENSG00000174827	PDZK1	PDZ domain containing 1	2.48364	2.70773	190.668	3.78e-07	4.64e-05
57523	ENSG00000205978	NYNRIN	NYN domain and retroviral integrase containing	-1.86595	4.1612	188.385	3.97e-07	4.81e-05
9221	ENSG00000166197	NOLC1	nucleolar and coiled-body phosphoprotein 1	0.797899	7.94349	188.405	3.97e-07	4.81e-05
165215	ENSG00000144369	FAM171B	family with sequence similarity 171 member B	-1.16835	5.59809	187.692	4.03e-07	4.82e-05
341640	ENSG00000150893	FREM2	FRAS1 related extracellular matrix 2	1.15083	8.31721	187.901	4.01e-07	4.82e-05
85441	ENSG00000130589	HELZ2	helicase with zinc finger 2	-1.14688	8.46041	187.07	4.09e-07	4.85e-05
22978	ENSG00000076685	NT5C2	5'-nucleotidase, cytosolic II	0.673227	7.02984	185.971	4.19e-07	4.94e-05
1503	ENSG00000171793	CTPS1	CTP synthase 1	0.903295	5.85527	185.504	4.23e-07	4.95e-05
23380	ENSG00000266028	SRGAP2	SLIT-ROBO Rho GTPase activating protein 2	-0.746476	5.72068	185.258	4.25e-07	4.95e-05
7450	ENSG00000110799	VWF	von Willebrand factor	2.56489	0.909804	185.008	4.28e-07	4.95e-05
51564	ENSG00000061273	HDAC7	histone deacetylase 7	-0.87045	5.72899	184.637	4.31e-07	4.96e-05
118980	ENSG00000156398	SFXN2	sideroflexin 2	1.74106	5.12193	184.245	4.35e-07	4.97e-05
5371	ENSG00000140464	PML	PML nuclear body scaffold	-0.807944	6.45437	183.36	4.44e-07	5.03e-05
4609	ENSG00000136997	MYC	MYC proto-oncogene, bHLH transcription factor	1.361	7.31541	182.377	4.53e-07	5.11e-05
10106	ENSG00000175215	CTDSP2	CTD small phosphatase 2	-0.674158	7.60533	181.7	4.6e-07	5.13e-05
134430	ENSG00000134987	WDR36	WD repeat domain 36	0.875327	5.91269	181.164	4.66e-07	5.13e-05
23076	ENSG00000160208	RRP1B	ribosomal RNA processing 1B	0.694904	6.50772	180.48	4.73e-07	5.13e-05
79828	ENSG00000123600	METTL8	methyltransferase 8, tRNA N3-cytidine	0.920372	4.84284	180.545	4.73e-07	5.13e-05
92935	ENSG00000247626	MARS2	methionyl-tRNA synthetase 2, mitochondrial	1.00625	5.13165	180.723	4.71e-07	5.13e-05
9580	ENSG00000143842	SOX13	SRY-box transcription factor 13	-0.800347	5.72801	180.313	4.75e-07	5.13e-05
9933	ENSG00000080608	PUM3	pumilio RNA binding family member 3	1.03591	5.17368	180.276	4.76e-07	5.13e-05
7408	ENSG00000125753	VASP	vasodilator stimulated phosphoprotein	-0.714706	6.65563	179.596	4.83e-07	5.18e-05
100507584	ENSG00000249346	LINC01016	long intergenic non-protein coding RNA 1016	4.33679	3.32898	192.573	4.87e-07	5.19e-05
262	ENSG00000123505	AMD1	adenosylmethionine decarboxylase 1	1.10448	7.52231	179.053	4.89e-07	5.19e-05
27340	ENSG00000120800	UTP20	UTP20 small subunit processome component	1.18821	5.88128	178.405	4.96e-07	5.23e-05
3707	ENSG00000143772	ITPKB	inositol-trisphosphate 3-kinase B	-1.02485	4.6993	178.056	5e-07	5.24e-05
54680	ENSG00000117174	ZNHIT6	zinc finger HIT-type containing 6	0.93251	4.7396	177.519	5.07e-07	5.28e-05
79691	ENSG00000151576	QTRT2	queuine tRNA-ribosyltransferase accessory subunit 2	0.857426	6.23524	176.616	5.17e-07	5.36e-05
57539	ENSG00000118965	WDR35	WD repeat domain 35	1.04533	4.59386	176.094	5.24e-07	5.39e-05
57224	ENSG00000135540	NHSL1	NHS like 1	1.23909	5.08198	175.327	5.33e-07	5.4e-05
60437	ENSG00000124215	CDH26	cadherin 26	2.68936	1.8304	175.297	5.34e-07	5.4e-05
79080	ENSG00000110104	CCDC86	coiled-coil domain containing 86	1.16975	5.86783	175.682	5.29e-07	5.4e-05
23560	ENSG00000107937	GTPBP4	GTP binding protein 4	0.682742	8.08243	174.672	5.41e-07	5.45e-05
23269	ENSG00000174197	MGA	MAX dimerization protein MGA	0.700265	7.29622	174.381	5.45e-07	5.45e-05
25885	ENSG00000068654	POLR1A	RNA polymerase I subunit A	0.671652	6.8433	173.727	5.54e-07	5.51e-05
57504	ENSG00000057935	MTA3	metastasis associated 1 family member 3	-0.73218	6.32608	172.895	5.65e-07	5.55e-05
92979	ENSG00000139266	MARCHF9	membrane associated ring-CH-type finger 9	-1.09286	4.84307	172.892	5.65e-07	5.55e-05
202	ENSG00000112297	CRYBG1	crystallin beta-gamma domain containing 1	-0.856747	6.62712	171.216	5.88e-07	5.59e-05
29763	ENSG00000165912	PACSIN3	protein kinase C and casein kinase substrate in neurons 3	-0.863568	5.98121	170.353	6e-07	5.59e-05
330	ENSG00000023445	BIRC3	baculoviral IAP repeat containing 3	1.70756	3.54679	170.552	5.97e-07	5.59e-05
3717	ENSG00000096968	JAK2	Janus kinase 2	1.59248	5.46344	170.671	5.95e-07	5.59e-05
51760	ENSG00000103528	SYT17	synaptotagmin 17	-1.24147	4.39854	170.889	5.92e-07	5.59e-05
54865	ENSG00000160818	GPATCH4	G-patch domain containing 4 (gene/pseudogene)	1.02125	6.17819	170.939	5.92e-07	5.59e-05
54865	ENSG00000292251	GPATCH4	G-patch domain containing 4 (gene/pseudogene)	1.02125	6.17819	170.939	5.92e-07	5.59e-05
55003	ENSG00000111845	PAK1IP1	PAK1 interacting protein 1	0.964307	5.34924	171.216	5.88e-07	5.59e-05
55003	ENSG00000285226	PAK1IP1	PAK1 interacting protein 1	0.964307	5.34924	171.216	5.88e-07	5.59e-05
7031	ENSG00000160182	TFF1	trefoil factor 1	0.617417	8.95519	171.065	5.9e-07	5.59e-05
7779	ENSG00000170385	SLC30A1	solute carrier family 30 member 1	0.896918	4.781	170.568	5.97e-07	5.59e-05
9424	ENSG00000099337	KCNK6	potassium two pore domain channel subfamily K member 6	1.25805	6.04349	171.24	5.87e-07	5.59e-05
90634	ENSG00000139597	N4BP2L1	NEDD4 binding protein 2 like 1	-1.84821	2.1568	169.748	6.09e-07	5.64e-05
5029	ENSG00000175591	P2RY2	purinergic receptor P2Y2	0.82599	6.94001	169.18	6.17e-07	5.66e-05
59339	ENSG00000169499	PLEKHA2	pleckstrin homology domain containing A2	-1.39699	4.27052	169.276	6.16e-07	5.66e-05
57602	ENSG00000055483	USP36	ubiquitin specific peptidase 36	0.765505	6.15612	167.39	6.45e-07	5.85e-05
80824	ENSG00000111266	DUSP16	dual specificity phosphatase 16	0.672092	6.42421	167.487	6.43e-07	5.85e-05
80824	ENSG00000280962	DUSP16	dual specificity phosphatase 16	0.672092	6.42421	167.487	6.43e-07	5.85e-05
89797	ENSG00000166833	NAV2	neuron navigator 2	2.55327	3.78855	173.25	6.64e-07	6e-05
51491	ENSG00000048162	NOP16	NOP16 nucleolar protein	1.19216	5.69519	165.928	6.68e-07	6.01e-05
10849	ENSG00000117877	POLR1G	RNA polymerase I subunit G	1.36764	3.99182	164.546	6.91e-07	6.01e-05
121642	ENSG00000189046	ALKBH2	alkB homolog 2, alpha-ketoglutarate dependent dioxygenase	0.887337	4.49955	164.998	6.84e-07	6.01e-05
134	ENSG00000163485	ADORA1	adenosine A1 receptor	1.6637	2.65572	164.662	6.9e-07	6.01e-05
146330	ENSG00000127585	FBXL16	F-box and leucine rich repeat protein 16	-1.12096	5.4555	163.642	7.07e-07	6.01e-05
153572	ENSG00000170561	IRX2	iroquois homeobox 2	0.762272	5.82332	164.687	6.89e-07	6.01e-05
1545	ENSG00000138061	CYP1B1	cytochrome P450 family 1 subfamily B member 1	1.95847	8.12782	181.846	7.03e-07	6.01e-05
2065	ENSG00000065361	ERBB3	erb-b2 receptor tyrosine kinase 3	-0.760085	8.35896	164.1	6.99e-07	6.01e-05
23176	ENSG00000164402	SEPTIN8	septin 8	-0.682952	6.4355	165.38	6.77e-07	6.01e-05
56172	ENSG00000154122	ANKH	ANKH inorganic pyrophosphate transport regulator	1.10823	4.75064	165.453	6.76e-07	6.01e-05
57647	ENSG00000150990	DHX37	DEAH-box helicase 37	0.898553	5.85309	163.835	7.04e-07	6.01e-05
8816	ENSG00000139990	DCAF5	DDB1 and CUL4 associated factor 5	-0.619361	6.99279	163.515	7.09e-07	6.01e-05
9533	ENSG00000171453	POLR1C	RNA polymerase I and III subunit C	0.857255	5.59432	164.273	6.96e-07	6.01e-05
64377	ENSG00000124302	CHST8	carbohydrate sulfotransferase 8	2.97313	0.557769	163.227	7.15e-07	6.03e-05
85465	ENSG00000138018	SELENOI	selenoprotein I	0.674332	7.26511	162.995	7.19e-07	6.03e-05
8568	ENSG00000160214	RRP1	ribosomal RNA processing 1	0.734223	5.99093	162.717	7.24e-07	6.05e-05
25987	ENSG00000182704	TSKU	tsukushi, small leucine rich proteoglycan	0.751326	7.88564	162.37	7.3e-07	6.06e-05
51313	ENSG00000164125	GASK1B	golgi associated kinase 1B	1.13122	3.33111	162.265	7.32e-07	6.06e-05
84549	ENSG00000198042	MAK16	MAK16 homolog	0.951379	4.76223	161.817	7.4e-07	6.1e-05
64798	ENSG00000155792	DEPTOR	DEP domain containing MTOR interacting protein	1.18738	4.77661	161.311	7.5e-07	6.15e-05
1788	ENSG00000119772	DNMT3A	DNA methyltransferase 3 alpha	-0.927158	5.79547	160.452	7.67e-07	6.22e-05
7903	ENSG00000113532	ST8SIA4	ST8 alpha-N-acetyl-neuraminide alpha-2,8-sialyltransferase 4	-1.15116	5.08748	160.319	7.69e-07	6.22e-05
8312	ENSG00000103126	AXIN1	axin 1	0.673006	6.58544	160.472	7.66e-07	6.22e-05
23586	ENSG00000107201	RIGI	RNA sensor RIG-I	-0.858522	6.5724	160.09	7.74e-07	6.23e-05
80757	ENSG00000184986	TMEM121	transmembrane protein 121	-1.73524	3.57223	159.78	7.8e-07	6.25e-05
102724515	ENSG00000204792	LINC01291	long intergenic non-protein coding RNA 1291	2.06597	2.89342	159.369	7.88e-07	6.26e-05
63897	ENSG00000068097	HEATR6	HEAT repeat containing 6	0.577157	8.63583	159.513	7.85e-07	6.26e-05
10807	ENSG00000165689	ENTR1	endosome associated trafficking regulator 1	0.722123	6.34647	158.973	7.96e-07	6.29e-05
81628	ENSG00000166925	TSC22D4	TSC22 domain family member 4	-0.760898	5.56617	158.216	8.12e-07	6.39e-05
595	ENSG00000110092	CCND1	cyclin D1	0.714209	9.87256	157.967	8.17e-07	6.4e-05
8908	ENSG00000056998	GYG2	glycogenin 2	-1.43362	3.86823	157.454	8.28e-07	6.46e-05
64318	ENSG00000173145	NOC3L	NOC3 like DNA replication regulator	1.19445	5.16972	156.752	8.43e-07	6.55e-05
29948	ENSG00000140961	OSGIN1	oxidative stress induced growth inhibitor 1	1.40912	4.6028	155.629	8.68e-07	6.7e-05
57605	ENSG00000090975	PITPNM2	phosphatidylinositol transfer protein membrane associated 2	1.45461	3.68978	155.559	8.7e-07	6.7e-05
19	ENSG00000165029	ABCA1	ATP binding cassette subfamily A member 1	-1.33181	3.30111	155.038	8.82e-07	6.72e-05
1942	ENSG00000169242	EFNA1	ephrin A1	-0.738284	6.57865	155.18	8.79e-07	6.72e-05
23351	ENSG00000100441	KHNYN	KH and NYN domain containing	-0.617863	7.0575	154.908	8.85e-07	6.72e-05
9816	ENSG00000135763	URB2	URB2 ribosome biogenesis homolog	1.27108	5.66614	154.353	8.98e-07	6.79e-05
10475	ENSG00000112343	TRIM38	tripartite motif containing 38	-1.10573	4.46584	152.573	9.41e-07	7.09e-05
79605	ENSG00000177614	PGBD5	piggyBac transposable element derived 5	1.89493	2.85969	152.034	9.55e-07	7.17e-05
83719	ENSG00000090238	YPEL3	yippee like 3	-0.764935	6.13181	151.49	9.69e-07	7.24e-05
57169	ENSG00000124201	ZNFX1	zinc finger NFX1-type containing 1	-0.564219	8.11635	151.071	9.8e-07	7.29e-05
55616	ENSG00000088280	ASAP3	ArfGAP with SH3 domain, ankyrin repeat and PH domain 3	-0.876418	4.48866	150.42	9.98e-07	7.36e-05
55616	ENSG00000282854	ASAP3	ArfGAP with SH3 domain, ankyrin repeat and PH domain 3	-0.876418	4.48866	150.42	9.98e-07	7.36e-05
8140	ENSG00000103257	SLC7A5	solute carrier family 7 member 5	1.07387	10.4499	150.395	9.98e-07	7.36e-05
148545	ENSG00000196427	NBPF4	NBPF member 4	1.71755	2.17094	149.843	1.01e-06	7.44e-05
11054	ENSG00000060491	OGFR	opioid growth factor receptor	-0.620425	7.14196	149.477	1.02e-06	7.49e-05
162073	ENSG00000205730	ITPRIPL2	ITPRIP like 2	-0.776282	5.24797	148.694	1.05e-06	7.59e-05
348926	ENSG00000290374	FAM86EP	family with sequence similarity 86, member A pseudogene	1.10126	3.71312	148.781	1.04e-06	7.59e-05
6256	ENSG00000186350	RXRA	retinoid X receptor alpha	-0.616237	8.06936	148.538	1.05e-06	7.59e-05
23548	ENSG00000113638	TTC33	tetratricopeptide repeat domain 33	-0.999096	3.66423	147.722	1.07e-06	7.7e-05
7005	ENSG00000007866	TEAD3	TEA domain transcription factor 3	-0.89751	5.84955	147.749	1.07e-06	7.7e-05
57530	ENSG00000143375	CGN	cingulin	-0.744698	7.41053	146.833	1.1e-06	7.86e-05
152485	ENSG00000151612	ZNF827	zinc finger protein 827	-1.30403	3.02714	145.381	1.15e-06	8.05e-05
1543	ENSG00000140465	CYP1A1	cytochrome P450 family 1 subfamily A member 1	2.07277	6.52884	161.999	1.14e-06	8.05e-05
3664	ENSG00000117595	IRF6	interferon regulatory factor 6	-0.813215	4.99402	145.687	1.14e-06	8.05e-05
92345	ENSG00000145414	NAF1	nuclear assembly factor 1 ribonucleoprotein	0.957699	4.97733	145.521	1.14e-06	8.05e-05
6405	ENSG00000001617	SEMA3F	semaphorin 3F	-0.746126	6.64878	145.04	1.16e-06	8.09e-05
79834	ENSG00000173517	PEAK1	pseudopodium enriched atypical kinase 1	-0.780521	5.93495	144.909	1.16e-06	8.09e-05
10171	ENSG00000120158	RCL1	RNA terminal phosphate cyclase like 1	1.27447	5.37348	144.205	1.18e-06	8.22e-05
118738	ENSG00000265763	ZNF488	zinc finger protein 488	2.6382	0.849235	143.999	1.19e-06	8.24e-05
222183	ENSG00000177679	SRRM3	serine/arginine repetitive matrix 3	-1.44826	3.84506	143.602	1.2e-06	8.27e-05
2535	ENSG00000180340	FZD2	frizzled class receptor 2	-1.11739	3.64384	143.657	1.2e-06	8.27e-05
2633	ENSG00000117228	GBP1	guanylate binding protein 1	1.37225	3.11619	143.256	1.22e-06	8.29e-05
51388	ENSG00000132603	NIP7	nucleolar pre-rRNA processing protein NIP7	0.930713	6.6523	143.337	1.21e-06	8.29e-05
22807	ENSG00000030419	IKZF2	IKAROS family zinc finger 2	-0.888787	4.89508	143.025	1.22e-06	8.3e-05
57688	ENSG00000130449	ZSWIM6	zinc finger SWIM-type containing 6	0.799708	4.66366	142.773	1.23e-06	8.3e-05
6714	ENSG00000197122	SRC	SRC proto-oncogene, non-receptor tyrosine kinase	-0.755079	5.2844	142.834	1.23e-06	8.3e-05
6714	ENSG00000291971	SRC	SRC proto-oncogene, non-receptor tyrosine kinase	-0.755079	5.2844	142.834	1.23e-06	8.3e-05
57669	ENSG00000115109	EPB41L5	erythrocyte membrane protein band 4.1 like 5	-0.617698	8.34998	142.434	1.25e-06	8.35e-05
54845	ENSG00000104413	ESRP1	epithelial splicing regulatory protein 1	-0.657835	7.73662	142.152	1.26e-06	8.39e-05
6513	ENSG00000117394	SLC2A1	solute carrier family 2 member 1	0.839587	7.29653	142.023	1.26e-06	8.39e-05
440465	ENSG00000226137	BAIAP2-DT	BAIAP2 divergent transcript	-1.31068	4.20587	141.847	1.27e-06	8.4e-05
56975	ENSG00000177706	FAM20C	FAM20C golgi associated secretory pathway kinase	-0.924034	4.95627	141.388	1.28e-06	8.45e-05
56975	ENSG00000281429	FAM20C	FAM20C golgi associated secretory pathway kinase	-0.924034	4.95627	141.388	1.28e-06	8.45e-05
56975	ENSG00000282147	FAM20C	FAM20C golgi associated secretory pathway kinase	-0.924034	4.95627	141.388	1.28e-06	8.45e-05
56975	ENSG00000288499	FAM20C	FAM20C golgi associated secretory pathway kinase	-0.924034	4.95627	141.388	1.28e-06	8.45e-05
84365	ENSG00000155438	NIFK	nucleolar protein interacting with the FHA domain of MKI67	1.06663	5.76582	141.503	1.28e-06	8.45e-05
10166	ENSG00000102743	SLC25A15	solute carrier family 25 member 15	0.789214	6.06769	140.936	1.3e-06	8.53e-05
3760	ENSG00000162989	KCNJ3	potassium inwardly rectifying channel subfamily J member 3	-1.14582	5.43762	140.439	1.32e-06	8.62e-05
2886	ENSG00000141738	GRB7	growth factor receptor bound protein 7	-1.49187	3.70612	140.079	1.33e-06	8.68e-05
154141	ENSG00000172197	MBOAT1	membrane bound O-acyltransferase domain containing 1	0.916295	5.53966	139.508	1.36e-06	8.76e-05
1662	ENSG00000178105	DDX10	DEAD-box helicase 10	1.43586	4.95163	139.609	1.35e-06	8.76e-05
50628	ENSG00000179409	GEMIN4	gem nuclear organelle associated protein 4	0.775535	6.01786	139.206	1.37e-06	8.8e-05
9923	ENSG00000184677	ZBTB40	zinc finger and BTB domain containing 40	0.731364	5.76077	138.943	1.38e-06	8.84e-05
1108	ENSG00000111642	CHD4	chromodomain helicase DNA binding protein 4	-0.560383	8.63191	138.348	1.4e-06	8.93e-05
113791	ENSG00000100100	PIK3IP1	phosphoinositide-3-kinase interacting protein 1	-1.00238	4.34958	138.371	1.4e-06	8.93e-05
155185	ENSG00000174945	AMZ1	archaelysin family metallopeptidase 1	1.17364	4.98619	137.886	1.42e-06	9.02e-05
1112	ENSG00000053254	FOXN3	forkhead box N3	-0.868282	5.59267	137.102	1.45e-06	9.04e-05
124454	ENSG00000103356	EARS2	glutamyl-tRNA synthetase 2, mitochondrial	0.631268	6.20346	136.963	1.46e-06	9.04e-05
401934	ENSG00000237330	RNF223	ring finger protein 223	0.827907	4.71443	137.01	1.46e-06	9.04e-05
55199	ENSG00000158483	FAM86C1P	family with sequence similarity 86 member C1, pseudogene	1.13449	4.08608	137.242	1.45e-06	9.04e-05
7100	ENSG00000187554	TLR5	toll like receptor 5	1.60205	2.47457	137.058	1.46e-06	9.04e-05
89846	ENSG00000127084	FGD3	FYVE, RhoGEF and PH domain containing 3	0.955381	3.99616	137.02	1.46e-06	9.04e-05
9545	ENSG00000105514	RAB3D	RAB3D, member RAS oncogene family	-0.691196	7.26432	137.244	1.45e-06	9.04e-05
6566	ENSG00000155380	SLC16A1	solute carrier family 16 member 1	0.858744	4.38019	136.765	1.47e-06	9.06e-05
6566	ENSG00000281917	SLC16A1	solute carrier family 16 member 1	0.858744	4.38019	136.765	1.47e-06	9.06e-05
10184	ENSG00000145685	LHFPL2	LHFPL tetraspan subfamily member 2	-0.745231	4.86043	136.317	1.49e-06	9.11e-05
83879	ENSG00000144354	CDCA7	cell division cycle associated 7	0.873923	4.61994	136.25	1.49e-06	9.11e-05
9830	ENSG00000106785	TRIM14	tripartite motif containing 14	-0.574513	7.1685	136.483	1.48e-06	9.11e-05
27124	ENSG00000185133	INPP5J	inositol polyphosphate-5-phosphatase J	-1.08856	3.823	135.976	1.5e-06	9.12e-05
64216	ENSG00000162851	TFB2M	transcription factor B2, mitochondrial	0.864827	4.81349	135.971	1.5e-06	9.12e-05
3123	ENSG00000196126	HLA-DRB1	major histocompatibility complex, class II, DR beta 1	0.712737	5.53923	135.256	1.54e-06	9.28e-05
3123	ENSG00000206240	HLA-DRB1	major histocompatibility complex, class II, DR beta 1	0.712737	5.53923	135.256	1.54e-06	9.28e-05
3123	ENSG00000206306	HLA-DRB1	major histocompatibility complex, class II, DR beta 1	0.712737	5.53923	135.256	1.54e-06	9.28e-05
3123	ENSG00000228080	HLA-DRB1	major histocompatibility complex, class II, DR beta 1	0.712737	5.53923	135.256	1.54e-06	9.28e-05
3123	ENSG00000229074	HLA-DRB1	major histocompatibility complex, class II, DR beta 1	0.712737	5.53923	135.256	1.54e-06	9.28e-05
3123	ENSG00000236884	HLA-DRB1	major histocompatibility complex, class II, DR beta 1	0.712737	5.53923	135.256	1.54e-06	9.28e-05
11011	ENSG00000146872	TLK2	tousled like kinase 2	-0.5658	7.52436	134.92	1.55e-06	9.35e-05
10105	ENSG00000108179	PPIF	peptidylprolyl isomerase F	0.688199	6.12687	134.43	1.57e-06	9.4e-05
405	ENSG00000143437	ARNT	aryl hydrocarbon receptor nuclear translocator	-0.601127	6.45484	134.557	1.57e-06	9.4e-05
54625	ENSG00000173193	PARP14	poly(ADP-ribose) polymerase family member 14	-0.75826	8.43668	134.396	1.58e-06	9.4e-05
54944	NA	LINC01521	long intergenic non-protein coding RNA 1521	-0.805657	4.76424	134.186	1.59e-06	9.43e-05
3660	ENSG00000168310	IRF2	interferon regulatory factor 2	-0.956097	4.60755	133.898	1.6e-06	9.48e-05
10439	ENSG00000130558	OLFM1	olfactomedin 1	0.961649	5.90191	133.505	1.62e-06	9.5e-05
1717	ENSG00000172893	DHCR7	7-dehydrocholesterol reductase	0.614982	8.17796	133.389	1.63e-06	9.5e-05
23246	ENSG00000261236	BOP1	BOP1 ribosomal biogenesis factor	0.611739	6.39853	133.414	1.62e-06	9.5e-05
9076	ENSG00000163347	CLDN1	claudin 1	1.56365	3.20019	133.561	1.62e-06	9.5e-05
79567	ENSG00000039523	RIPOR1	RHO family interacting cell polarization regulator 1	-0.859711	5.84794	133.102	1.64e-06	9.55e-05
79134	ENSG00000226479	TMEM185B	transmembrane protein 185B	0.873992	6.34643	132.585	1.67e-06	9.67e-05
72	ENSG00000163017	ACTG2	actin gamma 2, smooth muscle	1.27175	3.24508	132.381	1.68e-06	9.69e-05
79007	ENSG00000003249	DBNDD1	dysbindin domain containing 1	-0.83006	7.18252	132.287	1.68e-06	9.69e-05
83732	ENSG00000124784	RIOK1	RIO kinase 1	1.08895	4.99229	132.203	1.69e-06	9.69e-05
578	ENSG00000030110	BAK1	BCL2 antagonist/killer 1	-0.777327	5.87665	132.085	1.69e-06	9.69e-05
210	ENSG00000148218	ALAD	aminolevulinate dehydratase	-0.603316	6.03033	131.47	1.72e-06	9.84e-05
4234	ENSG00000037897	METTL1	methyltransferase 1, tRNA methylguanosine	1.50365	4.99853	131.367	1.73e-06	9.84e-05
26354	ENSG00000163938	GNL3	G protein nucleolar 3	0.674273	6.85648	130.937	1.75e-06	9.94e-05
25803	ENSG00000124664	SPDEF	SAM pointed domain containing ETS transcription factor	-0.779944	7.57895	130.71	1.76e-06	9.98e-05
9853	ENSG00000198853	RUSC2	RUN and SH3 domain containing 2	0.949067	3.92835	130.375	1.78e-06	0.000100524
11248	ENSG00000182575	NXPH3	neurexophilin 3	2.1735	2.46949	129.945	1.81e-06	0.000101551
2717	ENSG00000102393	GLA	galactosidase alpha	0.733061	5.21657	129.843	1.81e-06	0.000101554
10514	ENSG00000132382	MYBBP1A	MYB binding protein 1a	0.742479	6.31049	129.735	1.82e-06	0.000101573
64207	ENSG00000119669	IRF2BPL	interferon regulatory factor 2 binding protein like	-0.642686	7.00086	129.589	1.83e-06	0.000101716
9543	ENSG00000174498	IGDCC3	immunoglobulin superfamily DCC subclass member 3	-1.13029	4.16049	129.481	1.83e-06	0.000101739
10957	ENSG00000146278	PNRC1	proline rich nuclear receptor coactivator 1	-0.760644	5.94617	128.896	1.87e-06	0.000102537
23329	ENSG00000111490	TBC1D30	TBC1 domain family member 30	0.713778	6.29405	128.982	1.86e-06	0.000102537
6722	ENSG00000112658	SRF	serum response factor	0.627184	6.50566	128.834	1.87e-06	0.000102537
7162	ENSG00000146242	TPBG	trophoblast glycoprotein	0.664775	7.56509	128.998	1.86e-06	0.000102537
7162	ENSG00000283085	TPBG	trophoblast glycoprotein	0.664775	7.56509	128.998	1.86e-06	0.000102537
102723344	NA	LINC02568	long intergenic non-protein coding RNA 2568	2.32178	2.18813	128.659	1.88e-06	0.000102781
23481	ENSG00000100029	PES1	pescadillo ribosomal biogenesis factor 1	0.695366	6.78176	128.219	1.91e-06	0.000103894
441027	ENSG00000249242	TMEM150C	transmembrane protein 150C	-0.635165	7.15305	127.577	1.95e-06	0.00010527
5581	ENSG00000171132	PRKCE	protein kinase C epsilon	1.04569	5.19811	127.614	1.94e-06	0.00010527
79572	ENSG00000133657	ATP13A3	ATPase 13A3	0.704605	7.20957	127.512	1.95e-06	0.00010527
6510	ENSG00000105281	SLC1A5	solute carrier family 1 member 5	0.541153	8.47104	127.319	1.96e-06	0.000105592
81929	ENSG00000085415	SEH1L	SEH1 like nucleoporin	0.954186	5.87385	127.159	1.97e-06	0.000105809
252969	ENSG00000154328	NEIL2	nei like DNA glycosylase 2	0.847221	4.09189	127.049	1.98e-06	0.00010586
252969	ENSG00000292286	NEIL2	nei like DNA glycosylase 2	0.847221	4.09189	127.049	1.98e-06	0.00010586
11278	ENSG00000118922	KLF12	KLF transcription factor 12	-1.17674	3.14867	126.848	1.99e-06	0.000105896
23254	ENSG00000189337	KAZN	kazrin, periplakin interacting protein	0.876648	4.34756	126.882	1.99e-06	0.000105896
51174	ENSG00000108423	TUBD1	tubulin delta 1	-0.667305	7.11568	126.492	2.01e-06	0.000106784
58477	ENSG00000144867	SRPRB	SRP receptor subunit beta	0.641842	6.48085	126.216	2.03e-06	0.000107411
27295	ENSG00000154553	PDLIM3	PDZ and LIM domain 3	2.76868	-0.171947	125.67	2.07e-06	0.000108335
389332	ENSG00000271824	SMIM32	small integral membrane protein 32	3.54425	-0.519931	125.736	2.06e-06	0.000108335
55239	ENSG00000087263	OGFOD1	2-oxoglutarate and iron dependent oxygenase domain containing 1	0.724488	5.64873	125.671	2.07e-06	0.000108335
29914	ENSG00000120942	UBIAD1	UbiA prenyltransferase domain containing 1	1.20458	4.69144	125.266	2.1e-06	0.00010943
10322	ENSG00000135632	SMYD5	SMYD family member 5	0.750749	5.18435	124.926	2.12e-06	0.00011031
64417	ENSG00000151881	TMEM267	transmembrane protein 267	0.76867	5.22293	124.726	2.13e-06	0.0001107
146057	ENSG00000128881	TTBK2	tau tubulin kinase 2	-0.91363	3.6704	124.534	2.15e-06	0.000110739
27309	ENSG00000109445	ZNF330	zinc finger protein 330	0.656158	5.41493	124.62	2.14e-06	0.000110739
1906	ENSG00000078401	EDN1	endothelin 1	1.1579	3.21043	124.408	2.15e-06	0.000110868
23250	ENSG00000068650	ATP11A	ATPase phospholipid transporting 11A	0.846786	6.84322	124.203	2.17e-06	0.000111286
79633	ENSG00000196159	FAT4	FAT atypical cadherin 4	1.58466	3.29203	124.088	2.18e-06	0.00011138
3128	ENSG00000290878	HLA-DRB6	major histocompatibility complex, class II, DR beta 6 (pseudogene)	2.30181	1.87794	123.711	2.2e-06	0.000112431
51602	ENSG00000055044	NOP58	NOP58 ribonucleoprotein	0.762444	7.22919	123.563	2.21e-06	0.000112648
7056	ENSG00000178726	THBD	thrombomodulin	0.833383	4.29795	123.465	2.22e-06	0.000112685
114770	ENSG00000161031	PGLYRP2	peptidoglycan recognition protein 2	4.44034	-1.11555	123.112	2.25e-06	0.000113668
8800	ENSG00000166821	PEX11A	peroxisomal biogenesis factor 11 alpha	0.854842	4.70678	122.897	2.26e-06	0.000114145
3756	ENSG00000143473	KCNH1	potassium voltage-gated channel subfamily H member 1	2.45505	1.97121	122.683	2.28e-06	0.000114299
64794	ENSG00000125485	DDX31	DEAD-box helicase 31	0.812727	5.46383	122.74	2.27e-06	0.000114299
144097	ENSG00000168005	SPINDOC	spindlin interactor and repressor of chromatin binding	-0.654598	5.3347	122.441	2.3e-06	0.000114887
55341	ENSG00000041802	LSG1	large 60S subunit nuclear export GTPase 1	0.558165	6.25652	122.076	2.32e-06	0.000115949
4099	ENSG00000105695	MAG	myelin associated glycoprotein	2.91544	-0.347577	121.376	2.38e-06	0.0001182
9903	ENSG00000162413	KLHL21	kelch like family member 21	0.676785	5.04634	121.326	2.38e-06	0.0001182
27333	ENSG00000173905	GOLIM4	golgi integral membrane protein 4	0.959902	4.97199	121.211	2.39e-06	0.000118321
116113	ENSG00000137166	FOXP4	forkhead box P4	-0.673277	6.48207	121.016	2.41e-06	0.000118636
23102	ENSG00000167202	TBC1D2B	TBC1 domain family member 2B	-0.782453	5.93046	120.963	2.41e-06	0.000118636
10244	ENSG00000136933	RABEPK	Rab9 effector protein with kelch motifs	0.865896	4.11962	120.536	2.45e-06	0.000119017
10287	ENSG00000171700	RGS19	regulator of G protein signaling 19	-0.760126	4.63171	120.651	2.44e-06	0.000119017
129642	ENSG00000143797	MBOAT2	membrane bound O-acyltransferase domain containing 2	-0.598807	6.28005	120.734	2.43e-06	0.000119017
79896	ENSG00000185875	THNSL1	threonine synthase like 1	1.19668	5.85031	120.611	2.44e-06	0.000119017
85004	ENSG00000134533	RERG	RAS like estrogen regulated growth inhibitor	1.52184	3.77932	119.902	2.5e-06	0.000121235
2744	ENSG00000115419	GLS	glutaminase	0.653909	6.81614	119.563	2.53e-06	0.000122289
23201	ENSG00000054965	FAM168A	family with sequence similarity 168 member A	-0.617487	6.57471	119.147	2.56e-06	0.00012368
84451	ENSG00000143674	MAP3K21	mitogen-activated protein kinase kinase kinase 21	0.769407	4.87139	118.693	2.6e-06	0.000125253
53342	ENSG00000172458	IL17D	interleukin 17D	0.878973	4.69275	118.44	2.63e-06	0.000125989
784	ENSG00000167535	CACNB3	calcium voltage-gated channel auxiliary subunit beta 3	-0.891993	6.03987	118.05	2.66e-06	0.000127323
105371409	NA	LOC105371409	cadmium/zinc-transporting ATPase HMA2	1.41335	3.24827	117.765	2.69e-06	0.000127878
84946	ENSG00000135521	LTV1	LTV1 ribosome biogenesis factor	0.939725	5.56937	117.816	2.68e-06	0.000127878
138151	ENSG00000148411	NACC2	NACC family member 2	-0.84334	5.77867	117.114	2.75e-06	0.00013041
49854	ENSG00000173276	ZBTB21	zinc finger and BTB domain containing 21	0.644906	5.59716	116.882	2.77e-06	0.000131101
56931	ENSG00000141994	DUS3L	dihydrouridine synthase 3 like	0.935768	4.60758	116.332	2.82e-06	0.000133251
126382	ENSG00000184162	NR2C2AP	nuclear receptor 2C2 associated protein	0.767985	4.9359	115.969	2.86e-06	0.000134577
400506	ENSG00000103550	KNOP1	lysine rich nucleolar protein 1	0.768103	6.07532	115.592	2.9e-06	0.000135948
9314	ENSG00000136826	KLF4	KLF transcription factor 4	0.77912	6.51907	115.524	2.9e-06	0.000135948
114904	ENSG00000133466	C1QTNF6	C1q and TNF related 6	0.749257	7.09999	115.212	2.93e-06	0.000136418
167227	ENSG00000172795	DCP2	decapping mRNA 2	-0.552186	6.36124	115.197	2.94e-06	0.000136418
901	ENSG00000138764	CCNG2	cyclin G2	-0.868662	6.65794	115.348	2.92e-06	0.000136418
112849	ENSG00000126790	L3HYPDH	trans-L-3-hydroxyproline dehydratase	1.14684	4.03503	114.548	3e-06	0.000138803
22984	ENSG00000148843	PDCD11	programmed cell death 11	0.749446	6.72986	114.559	3e-06	0.000138803
3790	ENSG00000170745	KCNS3	potassium voltage-gated channel modifier subfamily S member 3	-0.971937	3.98223	114.477	3.01e-06	0.000138803
2064	ENSG00000141736	ERBB2	erb-b2 receptor tyrosine kinase 2	-0.631469	7.36999	114.325	3.03e-06	0.000139181
284352	ENSG00000104866	PPP1R37	protein phosphatase 1 regulatory subunit 37	-0.545415	6.23921	114.155	3.04e-06	0.000139293
6574	ENSG00000144136	SLC20A1	solute carrier family 20 member 1	0.571977	6.75	114.199	3.04e-06	0.000139293
10799	ENSG00000124787	RPP40	ribonuclease P/MRP subunit p40	1.18052	4.23069	113.79	3.08e-06	0.000140368
23361	ENSG00000102870	ZNF629	zinc finger protein 629	-0.556449	6.67046	113.791	3.08e-06	0.000140368
1876	ENSG00000169016	E2F6	E2F transcription factor 6	0.629996	5.98453	113.572	3.11e-06	0.00014109
55357	ENSG00000095383	TBC1D2	TBC1 domain family member 2	-0.811926	4.18992	113.389	3.13e-06	0.000141644
2005	ENSG00000158711	ELK4	ETS transcription factor ELK4	0.599374	6.80783	113.277	3.14e-06	0.000141842
5795	ENSG00000149177	PTPRJ	protein tyrosine phosphatase receptor type J	-0.706609	5.97107	112.743	3.2e-06	0.00014419
130340	ENSG00000152056	AP1S3	adaptor related protein complex 1 subunit sigma 3	0.743842	4.93249	112.375	3.24e-06	0.000145722
144577	ENSG00000174206	KICS2	KICSTOR subunit 2	1.26208	5.36533	112.114	3.27e-06	0.000146711
283576	ENSG00000177108	ZDHHC22	zinc finger DHHC-type palmitoyltransferase 22	2.99817	0.315465	111.948	3.29e-06	0.000147013
440193	ENSG00000015133	CCDC88C	coiled-coil domain containing 88C	0.667646	7.30746	111.845	3.3e-06	0.000147013
8871	ENSG00000078269	SYNJ2	synaptojanin 2	0.5793	5.99145	111.873	3.3e-06	0.000147013
79693	ENSG00000196449	YRDC	yrdC N6-threonylcarbamoyltransferase domain containing	0.730959	4.54393	111.722	3.32e-06	0.000147296
55332	ENSG00000136048	DRAM1	DNA damage regulated autophagy modulator 1	-0.797671	6.61153	111.178	3.38e-06	0.000149825
4602	ENSG00000118513	MYB	MYB proto-oncogene, transcription factor	1.1683	6.04155	111.034	3.4e-06	0.000149856
7164	ENSG00000111907	TPD52L1	TPD52 like 1	1.07055	7.87207	111.368	3.4e-06	0.000149856
10560	ENSG00000117479	SLC19A2	solute carrier family 19 member 2	0.678065	5.89314	110.963	3.41e-06	0.000149869
57486	ENSG00000123213	NLN	neurolysin	0.582858	6.06725	110.855	3.42e-06	0.000150084
114991	ENSG00000157657	ZNF618	zinc finger protein 618	-0.761386	5.44036	110.701	3.44e-06	0.00015055
54910	ENSG00000168758	SEMA4C	semaphorin 4C	-1.0491	8.20486	110.448	3.49e-06	0.000152091
51804	ENSG00000100625	SIX4	SIX homeobox 4	-0.604315	6.19278	110.281	3.5e-06	0.000152105
84154	ENSG00000197498	RPF2	ribosome production factor 2 homolog	0.901453	5.2327	110.054	3.53e-06	0.000152989
5168	ENSG00000136960	ENPP2	ectonucleotide pyrophosphatase/phosphodiesterase 2	5.75834	-1.22715	109.859	3.55e-06	0.00015323
55700	ENSG00000116871	MAP7D1	MAP7 domain containing 1	-0.785868	5.80866	109.899	3.55e-06	0.00015323
8602	ENSG00000087269	NOP14	NOP14 nucleolar protein	0.643729	6.13469	109.81	3.56e-06	0.00015323
54620	ENSG00000099364	FBXL19	F-box and leucine rich repeat protein 19	-0.623277	6.90046	109.707	3.57e-06	0.000153431
3673	ENSG00000164171	ITGA2	integrin subunit alpha 2	0.881346	6.24114	109.149	3.64e-06	0.000156212
55917	ENSG00000143079	CTTNBP2NL	CTTNBP2 N-terminal like	-0.884224	4.9877	109.006	3.66e-06	0.000156241
5914	ENSG00000131759	RARA	retinoic acid receptor alpha	0.751367	6.87715	108.947	3.67e-06	0.000156241
90233	ENSG00000204519	ZNF551	zinc finger protein 551	1.04399	3.69295	108.991	3.67e-06	0.000156241
60386	ENSG00000125454	SLC25A19	solute carrier family 25 member 19	0.846364	3.79189	108.682	3.71e-06	0.00015739
283149	ENSG00000186174	BCL9L	BCL9 like	-0.637833	8.1454	108.549	3.72e-06	0.000157417
653149	ENSG00000186086	NBPF6	NBPF member 6	2.70304	0.322541	108.548	3.73e-06	0.000157417
3708	ENSG00000150995	ITPR1	inositol 1,4,5-trisphosphate receptor type 1	1.93372	4.41963	113.223	3.76e-06	0.000158595
10813	ENSG00000156697	UTP14A	UTP14A small subunit processome component	0.839545	5.77385	108.067	3.79e-06	0.000158648
29889	ENSG00000134697	GNL2	G protein nucleolar 2	0.639253	5.88031	108.016	3.8e-06	0.000158648
79649	ENSG00000129680	MAP7D3	MAP7 domain containing 3	0.71263	4.82976	108.108	3.79e-06	0.000158648
9136	ENSG00000114767	RRP9	ribosomal RNA processing 9, U3 small nucleolar RNA binding protein	0.894242	5.01545	108.058	3.79e-06	0.000158648
116071	ENSG00000168062	BATF2	basic leucine zipper ATF-like transcription factor 2	-1.32403	2.97177	107.682	3.85e-06	0.000160243
153769	ENSG00000156463	SH3RF2	SH3 domain containing ring finger 2	2.44618	0.961655	107.514	3.87e-06	0.000160867
57701	ENSG00000167566	NCKAP5L	NCK associated protein 5 like	-0.743294	5.50227	107.361	3.89e-06	0.000161412
10420	ENSG00000070759	TESK2	testis associated actin remodelling kinase 2	-1.19953	3.10405	107.102	3.93e-06	0.000161897
5373	ENSG00000140650	PMM2	phosphomannomutase 2	0.659061	6.16977	107.092	3.93e-06	0.000161897
55035	ENSG00000198000	NOL8	nucleolar protein 8	0.824078	6.39869	107.214	3.91e-06	0.000161897
55035	ENSG00000291347	NOL8	nucleolar protein 8	0.824078	6.39869	107.214	3.91e-06	0.000161897
81034	ENSG00000164933	SLC25A32	solute carrier family 25 member 32	0.71947	5.87257	106.798	3.98e-06	0.000163305
100507217	NA	CHASERR	CHD2 adjacent suppressive regulatory RNA	-0.54594	6.54398	106.623	4e-06	0.000163997
8818	ENSG00000136908	DPM2	dolichyl-phosphate mannosyltransferase subunit 2, regulatory	0.787832	5.93965	106.159	4.07e-06	0.000166493
100101490	ENSG00000101898	MCTS2	MCTS family member 2	0.896205	3.46884	105.649	4.15e-06	0.000169337
56983	ENSG00000163389	POGLUT1	protein O-glucosyltransferase 1	0.733067	5.38386	105.554	4.17e-06	0.000169372
8291	ENSG00000135636	DYSF	dysferlin	3.05793	0.744559	105.522	4.17e-06	0.000169372
54800	ENSG00000114796	KLHL24	kelch like family member 24	-0.900809	5.23975	105.29	4.21e-06	0.000169698
55806	ENSG00000168453	HR	HR lysine demethylase and nuclear receptor corepressor	0.669785	4.64629	105.392	4.19e-06	0.000169698
84456	ENSG00000198945	L3MBTL3	L3MBTL histone methyl-lysine binding protein 3	-1.74781	1.54145	105.332	4.2e-06	0.000169698
1944	ENSG00000143590	EFNA3	ephrin A3	-1.62837	4.9767	109.908	4.23e-06	0.000169817
84798	ENSG00000167747	C19orf48P	multidrug resistance-related protein	0.622894	6.45077	105.152	4.23e-06	0.000169817
90784	NA	NA	NA	0.901106	4.14385	104.904	4.27e-06	0.000170972
9149	ENSG00000105204	DYRK1B	dual specificity tyrosine phosphorylation regulated kinase 1B	-0.664256	5.13731	104.854	4.28e-06	0.000170972
9149	ENSG00000281320	DYRK1B	dual specificity tyrosine phosphorylation regulated kinase 1B	-0.664256	5.13731	104.854	4.28e-06	0.000170972
4938	ENSG00000089127	OAS1	2'-5'-oligoadenylate synthetase 1	-0.654824	7.3012	104.174	4.39e-06	0.000175076
126375	ENSG00000180884	ZNF792	zinc finger protein 792	-1.17954	2.68405	104.07	4.41e-06	0.00017538
285958	ENSG00000232956	SNHG15	small nucleolar RNA host gene 15	0.856265	3.76175	103.867	4.44e-06	0.000176354
5152	ENSG00000160191	PDE9A	phosphodiesterase 9A	-1.26443	3.70532	103.733	4.47e-06	0.000176469
54868	ENSG00000109066	TMEM104	transmembrane protein 104	0.642733	4.88247	103.738	4.46e-06	0.000176469
55299	ENSG00000113460	BRIX1	biogenesis of ribosomes BRX1	0.798586	6.72792	103.577	4.49e-06	0.000177139
27443	ENSG00000099954	CECR2	CECR2 histone acetyl-lysine reader	-1.00956	4.13498	103.12	4.57e-06	0.000179891
10626	ENSG00000221926	TRIM16	tripartite motif containing 16	0.933259	6.80856	102.746	4.64e-06	0.000181177
29993	ENSG00000124507	PACSIN1	protein kinase C and casein kinase substrate in neurons 1	-0.907509	4.21935	102.835	4.62e-06	0.000181177
84056	ENSG00000102781	KATNAL1	katanin catalytic subunit A1 like 1	-0.785869	3.97996	102.707	4.65e-06	0.000181177
994	ENSG00000101224	CDC25B	cell division cycle 25B	-0.593804	7.6451	102.819	4.63e-06	0.000181177
200845	ENSG00000168301	KCTD6	potassium channel tetramerization domain containing 6	1.05362	3.40739	102.327	4.71e-06	0.000183064
9120	ENSG00000108932	SLC16A6	solute carrier family 16 member 6	0.564381	6.55322	102.331	4.71e-06	0.000183064
2852	ENSG00000164850	GPER1	G protein-coupled estrogen receptor 1	-1.66353	4.81606	106.782	4.73e-06	0.000183105
5507	ENSG00000119938	PPP1R3C	protein phosphatase 1 regulatory subunit 3C	-1.14952	5.58744	102.209	4.74e-06	0.000183105
55646	ENSG00000145220	LYAR	Ly1 antibody reactive	1.25569	5.07739	101.837	4.81e-06	0.000184978
7764	ENSG00000171940	ZNF217	zinc finger protein 217	-0.919729	9.76249	101.848	4.8e-06	0.000184978
57513	ENSG00000177303	CASKIN2	CASK interacting protein 2	-0.587779	6.09249	101.573	4.86e-06	0.000186492
9700	ENSG00000135476	ESPL1	extra spindle pole bodies like 1, separase	-0.600042	5.80048	101.336	4.9e-06	0.000187831
50515	ENSG00000171310	CHST11	carbohydrate sulfotransferase 11	0.704974	5.05667	101.112	4.94e-06	0.000189084
55131	ENSG00000106344	RBM28	RNA binding motif protein 28	0.539335	5.92932	100.863	4.99e-06	0.000190329
8614	ENSG00000113739	STC2	stanniocalcin 2	0.97228	7.90136	100.836	5e-06	0.000190329
23389	ENSG00000123066	MED13L	mediator complex subunit 13L	0.618224	8.61521	100.78	5.01e-06	0.000190338
56997	ENSG00000163050	COQ8A	coenzyme Q8A	0.57616	5.57637	100.151	5.14e-06	0.000194333
9915	ENSG00000172379	ARNT2	aryl hydrocarbon receptor nuclear translocator 2	-0.600595	6.2378	100.147	5.14e-06	0.000194333
8522	ENSG00000007237	GAS7	growth arrest specific 7	3.86298	-0.440427	100.047	5.16e-06	0.000194696
768211	ENSG00000181826	RELL1	RELT like 1	-0.741881	4.27059	99.9525	5.18e-06	0.000195011
27113	ENSG00000105327	BBC3	BCL2 binding component 3	-0.753345	5.3197	99.834	5.2e-06	0.000195452
285489	ENSG00000175920	DOK7	docking protein 7	0.772045	4.5409	99.6957	5.23e-06	0.000195452
7296	ENSG00000198431	TXNRD1	thioredoxin reductase 1	0.620607	8.1099	99.7337	5.22e-06	0.000195452
90378	ENSG00000141858	SAMD1	sterile alpha motif domain containing 1	-0.619709	5.68092	99.683	5.23e-06	0.000195452
90378	ENSG00000288488	SAMD1	sterile alpha motif domain containing 1	-0.619709	5.68092	99.683	5.23e-06	0.000195452
54981	ENSG00000106733	NMRK1	nicotinamide riboside kinase 1	0.918331	4.26834	99.404	5.29e-06	0.000196812
84135	ENSG00000164338	UTP15	UTP15 small subunit processome component	0.751103	4.95469	99.4245	5.29e-06	0.000196812
7107	ENSG00000077585	GPR137B	G protein-coupled receptor 137B	-0.692725	5.15436	99.0286	5.37e-06	0.000199375
1374	ENSG00000110090	CPT1A	carnitine palmitoyltransferase 1A	-0.474745	7.94143	98.7801	5.43e-06	0.000199398
23034	ENSG00000020577	SAMD4A	sterile alpha motif domain containing 4A	0.7527	5.22596	98.7148	5.44e-06	0.000199398
388228	ENSG00000188322	SBK1	SH3 domain binding kinase 1	-1.49615	5.68629	103.122	5.42e-06	0.000199398
388403	ENSG00000175155	YPEL2	yippee like 2	-0.673252	5.19402	98.8271	5.41e-06	0.000199398
6059	ENSG00000164163	ABCE1	ATP binding cassette subfamily E member 1	0.876603	7.22124	98.7409	5.43e-06	0.000199398
64328	ENSG00000132953	XPO4	exportin 4	0.52124	6.98349	98.843	5.41e-06	0.000199398
5829	ENSG00000089159	PXN	paxillin	-0.482289	7.63551	98.2688	5.54e-06	0.000202597
84541	ENSG00000163376	KBTBD8	kelch repeat and BTB domain containing 8	1.49208	2.85871	98.1875	5.56e-06	0.000202845
10785	ENSG00000160193	WDR4	WD repeat domain 4	0.615922	4.90301	98.048	5.59e-06	0.000203575
55686	ENSG00000118242	MREG	melanoregulin	0.639036	7.5765	97.9678	5.61e-06	0.000203818
23404	ENSG00000130713	EXOSC2	exosome component 2	0.534886	5.92862	97.8121	5.64e-06	0.000204689
22868	ENSG00000118246	FASTKD2	FAST kinase domains 2	0.653974	6.21228	97.7472	5.66e-06	0.00020481
29957	ENSG00000085491	SLC25A24	solute carrier family 25 member 24	0.628419	8.76592	97.6548	5.68e-06	0.00020516
29957	ENSG00000284468	SLC25A24	solute carrier family 25 member 24	0.628419	8.76592	97.6548	5.68e-06	0.00020516
91272	ENSG00000145919	BOD1	biorientation of chromosomes in cell division 1	0.552047	6.51921	97.007	5.83e-06	0.000210223
56987	ENSG00000114439	BBX	BBX high mobility group box domain containing	-0.741694	6.58829	96.8991	5.86e-06	0.000210724
64699	ENSG00000160183	TMPRSS3	transmembrane serine protease 3	1.72681	2.48552	96.666	5.91e-06	0.000212317
10904	ENSG00000166619	BLCAP	BLCAP apoptosis inducing factor	0.515738	5.84026	96.488	5.96e-06	0.000213441
196483	ENSG00000118894	EEF2KMT	eukaryotic elongation factor 2 lysine methyltransferase	0.836522	4.18361	96.369	5.98e-06	0.000213929
23112	ENSG00000100354	TNRC6B	trinucleotide repeat containing adaptor 6B	-0.679089	5.23818	96.3343	5.99e-06	0.000213929
10395	ENSG00000164741	DLC1	DLC1 Rho GTPase activating protein	0.715862	6.09016	95.984	6.08e-06	0.000214466
10395	ENSG00000288673	DLC1	DLC1 Rho GTPase activating protein	0.715862	6.09016	95.984	6.08e-06	0.000214466
4854	ENSG00000074181	NOTCH3	notch receptor 3	-1.03761	7.78407	98.7158	6.04e-06	0.000214466
51001	ENSG00000156469	MTERF3	mitochondrial transcription termination factor 3	0.637858	4.84016	95.9079	6.1e-06	0.000214466
51154	ENSG00000053372	MRTO4	MRT4 homolog, ribosome maturation factor	0.795244	5.51579	95.8858	6.1e-06	0.000214466
64131	ENSG00000103489	XYLT1	xylosyltransferase 1	0.887571	3.90635	96.0651	6.06e-06	0.000214466
64131	ENSG00000285395	XYLT1	xylosyltransferase 1	0.887571	3.90635	96.0651	6.06e-06	0.000214466
645332	ENSG00000290994	FAM86C2P	family with sequence similarity 86, member A pseudogene	1.04547	2.95939	95.9448	6.09e-06	0.000214466
661	ENSG00000168495	POLR3D	RNA polymerase III subunit D	0.619428	5.37214	96.097	6.05e-06	0.000214466
79668	ENSG00000151883	PARP8	poly(ADP-ribose) polymerase family member 8	-0.78401	5.13945	96.1084	6.05e-06	0.000214466
51175	ENSG00000074935	TUBE1	tubulin epsilon 1	1.01431	3.05741	95.6041	6.18e-06	0.000216125
9381	ENSG00000115155	OTOF	otoferlin	4.42519	-1.13748	95.6279	6.17e-06	0.000216125
51430	ENSG00000094975	SUCO	SUN domain containing ossification factor	0.56632	7.22301	95.4397	6.22e-06	0.00021681
51633	ENSG00000155100	OTUD6B	OTU deubiquitinase 6B	0.739661	5.74768	95.4328	6.22e-06	0.00021681
55715	ENSG00000125170	DOK4	docking protein 4	-0.978973	3.95663	95.0988	6.31e-06	0.000219411
1824	ENSG00000134755	DSC2	desmocollin 2	-0.730204	5.32668	95.0352	6.32e-06	0.000219562
5205	ENSG00000081923	ATP8B1	ATPase phospholipid transporting 8B1	0.646143	5.53703	94.7362	6.4e-06	0.000221886
23580	ENSG00000179604	CDC42EP4	CDC42 effector protein 4	-0.738757	5.68181	94.5968	6.44e-06	0.000222747
51651	ENSG00000141378	PTRH2	peptidyl-tRNA hydrolase 2	0.560435	6.29246	94.487	6.47e-06	0.000223338
6920	ENSG00000204219	TCEA3	transcription elongation factor A3	-0.739231	4.7058	94.4318	6.49e-06	0.00022342
6920	ENSG00000282941	TCEA3	transcription elongation factor A3	-0.739231	4.7058	94.4318	6.49e-06	0.00022342
8882	ENSG00000109917	ZPR1	ZPR1 zinc finger	0.730003	5.22643	94.3178	6.52e-06	0.000224055
55319	ENSG00000198498	TMA16	translation machinery associated 16 homolog	0.817774	5.69916	93.8692	6.64e-06	0.000227883
51762	ENSG00000166128	RAB8B	RAB8B, member RAS oncogene family	-0.735673	4.47555	93.7656	6.67e-06	0.000228438
343990	ENSG00000196872	CRACDL	CRACD like	-0.754766	4.90735	93.4285	6.77e-06	0.00023089
53349	ENSG00000165861	ZFYVE1	zinc finger FYVE-type containing 1	-0.596311	5.41634	93.4218	6.77e-06	0.00023089
1140	ENSG00000170175	CHRNB1	cholinergic receptor nicotinic beta 1 subunit	-1.04475	2.71815	92.816	6.94e-06	0.000236455
1140	ENSG00000283946	CHRNB1	cholinergic receptor nicotinic beta 1 subunit	-1.04475	2.71815	92.816	6.94e-06	0.000236455
91683	ENSG00000173227	SYT12	synaptotagmin 12	0.743349	6.94233	92.7534	6.96e-06	0.000236631
54438	ENSG00000145990	GFOD1	Gfo/Idh/MocA-like oxidoreductase domain containing 1	0.751652	4.12177	92.6433	7e-06	0.00023729
201164	ENSG00000179598	PLD6	phospholipase D family member 6	0.792149	3.90228	92.3368	7.09e-06	0.00023996
10360	ENSG00000107833	NPM3	nucleophosmin/nucleoplasmin 3	0.626551	4.57649	92.2772	7.11e-06	0.000240114
153090	ENSG00000136848	DAB2IP	DAB2 interacting protein	-0.630013	6.0615	92.1826	7.13e-06	0.000240631
5471	ENSG00000128059	PPAT	phosphoribosyl pyrophosphate amidotransferase	0.745567	6.15949	92.067	7.17e-06	0.000241368
169714	ENSG00000165661	QSOX2	quiescin sulfhydryl oxidase 2	0.739174	5.80537	91.9812	7.2e-06	0.000241799
2899	ENSG00000163873	GRIK3	glutamate ionotropic receptor kainate type subunit 3	1.52388	1.55716	91.7058	7.28e-06	0.000243756
79152	ENSG00000103089	FA2H	fatty acid 2-hydroxylase	-0.883645	4.05492	91.7071	7.28e-06	0.000243756
133522	ENSG00000155846	PPARGC1B	PPARG coactivator 1 beta	0.800225	4.03259	91.4725	7.36e-06	0.000245758
51222	ENSG00000165804	ZNF219	zinc finger protein 219	-0.573612	6.25997	91.3783	7.39e-06	0.000246295
54663	ENSG00000133316	WDR74	WD repeat domain 74	0.517651	6.12782	90.906	7.54e-06	0.000250916
23677	ENSG00000130147	SH3BP4	SH3 domain binding protein 4	-0.560015	6.74089	90.6785	7.61e-06	0.000252935
7866	ENSG00000214706	IFRD2	interferon related developmental regulator 2	0.497841	5.92626	90.0556	7.82e-06	0.000259424
64782	ENSG00000181026	AEN	apoptosis enhancing nuclease	0.566767	6.74731	89.8971	7.88e-06	0.000260746
148398	ENSG00000187634	SAMD11	sterile alpha motif domain containing 11	-0.849892	3.82545	89.7366	7.93e-06	0.000261612
23195	ENSG00000112159	MDN1	midasin AAA ATPase 1	0.549031	7.08229	89.7733	7.92e-06	0.000261612
7023	ENSG00000090447	TFAP4	transcription factor AP-4	0.981403	4.50625	89.5226	8.01e-06	0.000263597
1001	ENSG00000062038	CDH3	cadherin 3	-0.497027	6.92803	89.4562	8.03e-06	0.000263677
8204	ENSG00000180530	NRIP1	nuclear receptor interacting protein 1	1.08425	7.34645	93.1848	8.04e-06	0.000263677
79991	ENSG00000107960	STN1	STN1 subunit of CST complex	0.575492	5.10702	89.374	8.06e-06	0.000263859
200942	ENSG00000185909	KLHDC8B	kelch domain containing 8B	-1.34789	3.16552	89.2268	8.11e-06	0.000264832
6832	ENSG00000156502	SUPV3L1	Suv3 like RNA helicase	0.547122	5.11164	89.2071	8.12e-06	0.000264832
51734	ENSG00000198736	MSRB1	methionine sulfoxide reductase B1	-0.65403	5.63017	89.0267	8.19e-06	0.000265975
51734	ENSG00000291928	MSRB1	methionine sulfoxide reductase B1	-0.65403	5.63017	89.0267	8.19e-06	0.000265975
80320	ENSG00000189120	SP6	Sp6 transcription factor	-1.14484	4.69954	89.0606	8.17e-06	0.000265975
5296	ENSG00000105647	PIK3R2	phosphoinositide-3-kinase regulatory subunit 2	-0.458907	7.57986	88.9158	8.23e-06	0.000266796
286042	ENSG00000173295	FAM86B3P	family with sequence similarity 86, member A pseudogene	1.48893	2.59936	88.7459	8.29e-06	0.000268323
286042	ENSG00000285119	FAM86B3P	family with sequence similarity 86, member A pseudogene	1.48893	2.59936	88.7459	8.29e-06	0.000268323
286042	ENSG00000291049	FAM86B3P	family with sequence similarity 86, member A pseudogene	1.48893	2.59936	88.7459	8.29e-06	0.000268323
54492	ENSG00000214357	NEURL1B	neuralized E3 ubiquitin protein ligase 1B	-0.946091	5.10353	88.3209	8.45e-06	0.000272948
602	ENSG00000069399	BCL3	BCL3 transcription coactivator	-0.822487	5.15221	88.2378	8.48e-06	0.000273463
100128881	ENSG00000261373	VPS9D1-AS1	VPS9D1 antisense RNA 1	0.74123	4.26624	88.1964	8.49e-06	0.000273471
1364	ENSG00000189143	CLDN4	claudin 4	-0.61366	8.908	87.8941	8.61e-06	0.00027619
1960	ENSG00000179388	EGR3	early growth response 3	2.79407	4.76763	102.868	8.6e-06	0.00027619
10598	ENSG00000100591	AHSA1	activator of HSP90 ATPase activity 1	0.494382	7.55332	87.7395	8.67e-06	0.000276918
22905	ENSG00000072134	EPN2	epsin 2	-0.596386	5.43997	87.6967	8.69e-06	0.000276918
283212	ENSG00000149243	KLHL35	kelch like family member 35	1.24653	2.49001	87.7221	8.68e-06	0.000276918
84187	ENSG00000157600	TMEM164	transmembrane protein 164	1.19779	4.89191	87.6745	8.7e-06	0.000276918
153222	ENSG00000164463	CREBRF	CREB3 regulatory factor	-0.744748	4.12281	87.5451	8.75e-06	0.000278033
101929780	ENSG00000291005	NBPF25P	NBPF member 25, pseudogene	1.04694	2.57837	87.4609	8.78e-06	0.000278364
84722	ENSG00000134222	PSRC1	proline and serine rich coiled-coil 1	-0.791756	3.96686	87.439	8.79e-06	0.000278364
5869	ENSG00000111540	RAB5B	RAB5B, member RAS oncogene family	-0.428465	7.78957	87.396	8.81e-06	0.000278406
8662	ENSG00000106263	EIF3B	eukaryotic translation initiation factor 3 subunit B	0.451216	8.91887	87.3448	8.83e-06	0.000278551
55603	ENSG00000112773	TENT5A	terminal nucleotidyltransferase 5A	0.704037	7.75903	87.2444	8.87e-06	0.000279317
51363	ENSG00000182022	CHST15	carbohydrate sulfotransferase 15	-0.556608	6.66161	87.0296	8.95e-06	0.00028154
10160	ENSG00000152767	FARP1	FERM, ARH/RhoGEF and pleckstrin domain protein 1	0.553822	5.72649	86.9479	8.99e-06	0.000282081
56999	ENSG00000163638	ADAMTS9	ADAM metallopeptidase with thrombospondin type 1 motif 9	1.47175	3.69283	86.9041	9e-06	0.000282141
8322	ENSG00000174804	FZD4	frizzled class receptor 4	-0.628036	6.78317	86.8559	9.02e-06	0.000282258
23037	ENSG00000133401	PDZD2	PDZ domain containing 2	-0.961444	3.13836	86.7589	9.06e-06	0.000283001
81031	ENSG00000197496	SLC2A10	solute carrier family 2 member 10	-1.04074	5.88725	86.4968	9.17e-06	0.000285383
9841	ENSG00000112365	ZBTB24	zinc finger and BTB domain containing 24	0.695607	4.82877	86.5027	9.17e-06	0.000285383
23590	ENSG00000148459	PDSS1	decaprenyl diphosphate synthase subunit 1	0.684136	4.53103	86.373	9.22e-06	0.000286163
692099	ENSG00000244026	FAM86DP	family with sequence similarity 86 member D, pseudogene	0.861755	3.69725	86.3213	9.24e-06	0.000286163
692099	ENSG00000288323	FAM86DP	family with sequence similarity 86 member D, pseudogene	0.861755	3.69725	86.3213	9.24e-06	0.000286163
692099	ENSG00000291223	FAM86DP	family with sequence similarity 86 member D, pseudogene	0.861755	3.69725	86.3213	9.24e-06	0.000286163
867	ENSG00000110395	CBL	Cbl proto-oncogene	-0.677625	6.07213	86.3539	9.23e-06	0.000286163
150	ENSG00000150594	ADRA2A	adrenoceptor alpha 2A	3.57812	-1.34959	86.2203	9.29e-06	0.000286982
105374860	NA	NA	NA	1.95726	0.677395	85.9793	9.39e-06	0.000289653
23052	ENSG00000149218	ENDOD1	endonuclease domain containing 1	0.567119	5.92411	85.8623	9.44e-06	0.000290701
200316	ENSG00000128394	APOBEC3F	apolipoprotein B mRNA editing enzyme catalytic subunit 3F	-1.43933	1.3255	85.8112	9.46e-06	0.000290876
221830	ENSG00000105849	POLR1F	RNA polymerase I subunit F	0.788272	4.74022	85.6218	9.55e-06	0.000292419
51678	ENSG00000105926	PALS2	protein associated with LIN7 2, MAGUK p55 family member	0.874226	4.23872	85.6203	9.55e-06	0.000292419
6838	ENSG00000148296	SURF6	surfeit 6	0.588323	6.06443	85.5012	9.6e-06	0.000293514
6838	ENSG00000281309	SURF6	surfeit 6	0.588323	6.06443	85.5012	9.6e-06	0.000293514
23493	ENSG00000135547	HEY2	hes related family bHLH transcription factor with YRPW motif 2	2.56834	0.926459	85.2509	9.71e-06	0.000295893
857	ENSG00000105974	CAV1	caveolin 1	1.53825	3.26227	85.2559	9.71e-06	0.000295893
10512	ENSG00000075223	SEMA3C	semaphorin 3C	0.535975	9.40462	85.1217	9.77e-06	0.000297149
4772	ENSG00000131196	NFATC1	nuclear factor of activated T cells 1	-0.924122	3.51586	85.0312	9.81e-06	0.000297882
10444	ENSG00000160445	ZER1	zyg-11 related cell cycle regulator	-0.467166	6.57306	84.8049	9.91e-06	0.000299572
26156	ENSG00000171490	RSL1D1	ribosomal L1 domain containing 1	0.682558	7.89463	84.7979	9.91e-06	0.000299572
6387	ENSG00000107562	CXCL12	C-X-C motif chemokine ligand 12	2.42947	6.06846	99.0402	9.88e-06	0.000299572
84524	ENSG00000144161	ZC3H8	zinc finger CCCH-type containing 8	0.6744	4.74992	84.6025	1e-05	0.000301717
953	ENSG00000138185	ENTPD1	ectonucleoside triphosphate diphosphohydrolase 1	0.477932	5.78351	84.5705	1e-05	0.000301717
7705	ENSG00000167635	ZNF146	zinc finger protein 146	0.823713	7.43538	84.4469	1.01e-05	0.00030294
1073	ENSG00000165410	CFL2	cofilin 2	-0.612604	4.61101	84.2923	1.02e-05	0.000304272
115825	ENSG00000139668	WDFY2	WD repeat and FYVE domain containing 2	-0.653248	4.57025	84.2797	1.02e-05	0.000304272
2317	ENSG00000136068	FLNB	filamin B	0.429014	8.76373	84.2128	1.02e-05	0.000304707
1808	ENSG00000092964	DPYSL2	dihydropyrimidinase like 2	-0.628395	4.99677	84.1063	1.02e-05	0.000305708
51684	ENSG00000107882	SUFU	SUFU negative regulator of hedgehog signaling	-0.696116	4.264	84.0543	1.03e-05	0.000305935
636	ENSG00000151746	BICD1	BICD cargo adaptor 1	0.632537	4.61153	83.9311	1.03e-05	0.000307183
10761	ENSG00000170965	PLAC1	placenta enriched 1	2.06685	0.363113	83.5891	1.05e-05	0.00030918
219	ENSG00000137124	ALDH1B1	aldehyde dehydrogenase 1 family member B1	0.750644	4.86787	83.5432	1.05e-05	0.00030918
2260	ENSG00000077782	FGFR1	fibroblast growth factor receptor 1	-0.701645	4.51253	83.6954	1.04e-05	0.00030918
339287	ENSG00000188895	MSL1	MSL complex subunit 1	-0.440539	6.80767	83.5633	1.05e-05	0.00030918
58513	ENSG00000127527	EPS15L1	epidermal growth factor receptor pathway substrate 15 like 1	0.458997	6.97473	83.6902	1.04e-05	0.00030918
81844	ENSG00000169871	TRIM56	tripartite motif containing 56	-0.662151	6.65306	83.6372	1.05e-05	0.00030918
9145	ENSG00000100321	SYNGR1	synaptogyrin 1	-0.609449	4.54093	83.6231	1.05e-05	0.00030918
140688	ENSG00000197183	NOL4L	nucleolar protein 4 like	-1.70047	4.77278	86.791	1.06e-05	0.000309726
256309	ENSG00000168491	CCDC110	coiled-coil domain containing 110	1.90768	1.04748	83.4148	1.06e-05	0.000309726
79962	ENSG00000178401	DNAJC22	DnaJ heat shock protein family (Hsp40) member C22	-0.87232	4.98846	83.4518	1.06e-05	0.000309726
3720	ENSG00000008083	JARID2	jumonji and AT-rich interaction domain containing 2	0.534848	7.03938	83.3023	1.06e-05	0.000310636
5817	ENSG00000073008	PVR	PVR cell adhesion molecule	0.644793	5.75344	83.207	1.07e-05	0.000311519
65260	ENSG00000162377	COA7	cytochrome c oxidase assembly factor 7	1.0474	5.47398	83.0711	1.07e-05	0.000311981
7832	ENSG00000159388	BTG2	BTG anti-proliferation factor 2	-1.27596	5.98044	86.4962	1.07e-05	0.000311981
8650	ENSG00000133961	NUMB	NUMB endocytic adaptor protein	-0.462405	6.5675	83.1058	1.07e-05	0.000311981
51605	ENSG00000089195	TRMT6	tRNA methyltransferase 6 non-catalytic subunit	0.647252	4.85027	82.9831	1.08e-05	0.000312767
29078	ENSG00000123545	NDUFAF4	NADH:ubiquinone oxidoreductase complex assembly factor 4	1.16579	4.04186	82.8507	1.09e-05	0.000314217
9263	ENSG00000164543	STK17A	serine/threonine kinase 17a	0.681105	4.20311	82.7454	1.09e-05	0.000315272
9764	ENSG00000135709	KIAA0513	KIAA0513	-0.761437	6.56885	82.5759	1.1e-05	0.000317297
84315	ENSG00000164077	MON1A	MON1 homolog A, secretory trafficking associated	0.953621	2.96446	82.5404	1.1e-05	0.000317315
23648	ENSG00000157216	SSBP3	single stranded DNA binding protein 3	-0.59141	4.84272	82.4518	1.11e-05	0.000318136
120227	ENSG00000186104	CYP2R1	cytochrome P450 family 2 subfamily R member 1	0.71328	3.83215	82.4011	1.11e-05	0.000318388
55226	ENSG00000135372	NAT10	N-acetyltransferase 10	0.491479	6.68513	82.1966	1.12e-05	0.000320981
56271	ENSG00000102409	BEX4	brain expressed X-linked 4	-0.612456	4.58724	81.7377	1.15e-05	0.000327565
10507	ENSG00000187764	SEMA4D	semaphorin 4D	-1.11819	4.55826	81.5799	1.15e-05	0.00032899
54606	ENSG00000136271	DDX56	DEAD-box helicase 56	0.541311	6.3041	81.6067	1.15e-05	0.00032899
10329	ENSG00000118600	RXYLT1	ribitol xylosyltransferase 1	0.866643	5.15867	81.5175	1.16e-05	0.00032936
23433	ENSG00000119729	RHOQ	ras homolog family member Q	-0.526582	6.68303	81.4895	1.16e-05	0.00032936
116236	ENSG00000168792	ABHD15	abhydrolase domain containing 15	-0.669163	4.66232	81.3881	1.16e-05	0.000330439
3909	ENSG00000053747	LAMA3	laminin subunit alpha 3	1.44557	5.17797	84.5852	1.17e-05	0.000331044
5453	ENSG00000185668	POU3F1	POU class 3 homeobox 1	3.37409	-0.937184	81.0873	1.18e-05	0.00033419
3223	ENSG00000197757	HOXC6	homeobox C6	-1.28955	2.44977	80.9397	1.19e-05	0.000335715
6781	ENSG00000159167	STC1	stanniocalcin 1	0.602492	6.97658	80.9269	1.19e-05	0.000335715
23332	ENSG00000074054	CLASP1	cytoplasmic linker associated protein 1	-0.599685	6.32536	80.8856	1.19e-05	0.000335852
51291	ENSG00000089639	GMIP	GEM interacting protein	-0.707428	4.89349	80.7586	1.2e-05	0.000337387
54913	ENSG00000178718	RPP25	ribonuclease P and MRP subunit p25	0.612332	4.40883	80.7162	1.2e-05	0.000337545
26043	ENSG00000163960	UBXN7	UBX domain protein 7	-0.583116	5.55276	80.5811	1.21e-05	0.000339224
6594	ENSG00000102038	SMARCA1	SWI/SNF related, matrix associated, actin dependent regulator of chromatin, subfamily a, member 1	-0.658292	4.06946	80.4985	1.22e-05	0.000339994
83888	ENSG00000137441	FGFBP2	fibroblast growth factor binding protein 2	4.36808	-1.64725	80.4369	1.22e-05	0.000339994
9922	ENSG00000144711	IQSEC1	IQ motif and Sec7 domain ArfGEF 1	-0.596501	7.03239	80.4391	1.22e-05	0.000339994
79943	ENSG00000185730	ZNF696	zinc finger protein 696	0.736346	4.49288	80.3943	1.22e-05	0.000340163
5027	ENSG00000089041	P2RX7	purinergic receptor P2X 7	2.0899	0.198032	80.069	1.24e-05	0.000344388
51228	ENSG00000139433	GLTP	glycolipid transfer protein	-0.608505	5.41615	80.0444	1.24e-05	0.000344388
5331	ENSG00000149782	PLCB3	phospholipase C beta 3	-0.800761	6.16358	80.0767	1.24e-05	0.000344388
10061	ENSG00000033050	ABCF2	ATP binding cassette subfamily F member 2	0.489113	6.78636	79.9245	1.25e-05	0.000345871
50855	ENSG00000102981	PARD6A	par-6 family cell polarity regulator alpha	-0.968156	2.97232	79.8659	1.25e-05	0.000346322
10765	ENSG00000117139	KDM5B	lysine demethylase 5B	-0.55056	8.3759	79.5369	1.27e-05	0.000349757
1399	ENSG00000099942	CRKL	CRK like proto-oncogene, adaptor protein	0.445199	7.45895	79.606	1.27e-05	0.000349757
3491	ENSG00000142871	CCN1	cellular communication network factor 1	0.847878	4.17804	79.5201	1.28e-05	0.000349757
80312	ENSG00000138336	TET1	tet methylcytosine dioxygenase 1	-1.03599	3.23347	79.506	1.28e-05	0.000349757
84306	ENSG00000126249	PDCD2L	programmed cell death 2 like	0.708477	4.03722	79.5307	1.27e-05	0.000349757
51018	ENSG00000067533	RRP15	ribosomal RNA processing 15 homolog	0.805771	5.76663	79.4559	1.28e-05	0.000350079
158763	ENSG00000147256	ARHGAP36	Rho GTPase activating protein 36	3.30097	-0.0378939	79.2322	1.29e-05	0.000353407
142891	ENSG00000156671	SAMD8	sterile alpha motif domain containing 8	-0.53807	5.17747	79.1029	1.3e-05	0.000354574
6195	ENSG00000117676	RPS6KA1	ribosomal protein S6 kinase A1	-0.864472	4.41398	79.118	1.3e-05	0.000354574
6195	ENSG00000281877	RPS6KA1	ribosomal protein S6 kinase A1	-0.864472	4.41398	79.118	1.3e-05	0.000354574
10622	ENSG00000113356	POLR3G	RNA polymerase III subunit G	1.05344	2.85192	78.9215	1.31e-05	0.000357216
162	ENSG00000100280	AP1B1	adaptor related protein complex 1 subunit beta 1	0.478955	7.72089	78.7329	1.33e-05	0.000359681
22893	ENSG00000140320	BAHD1	bromo adjacent homology domain containing 1	-0.51793	6.39603	78.7207	1.33e-05	0.000359681
23087	ENSG00000104228	TRIM35	tripartite motif containing 35	0.656905	4.3861	78.5277	1.34e-05	0.000361497
58499	ENSG00000148143	ZNF462	zinc finger protein 462	0.807471	3.58891	78.5572	1.34e-05	0.000361497
81609	ENSG00000143376	SNX27	sorting nexin 27	-0.475222	6.20201	78.5268	1.34e-05	0.000361497
9050	ENSG00000152229	PSTPIP2	proline-serine-threonine phosphatase interacting protein 2	0.78264	4.63199	78.2873	1.36e-05	0.000365273
3087	ENSG00000152804	HHEX	hematopoietically expressed homeobox	-1.51392	1.77881	78.1701	1.36e-05	0.000366856
114789	ENSG00000148339	SLC25A25	solute carrier family 25 member 25	0.51366	5.64679	77.8611	1.38e-05	0.000369572
153364	ENSG00000176055	MBLAC2	metallo-beta-lactamase domain containing 2	1.14002	3.80653	77.9338	1.38e-05	0.000369572
163732	ENSG00000179862	CITED4	Cbp/p300 interacting transactivator with Glu/Asp rich carboxy-terminal domain 4	1.14531	2.8168	77.8108	1.39e-05	0.000369572
3636	ENSG00000165458	INPPL1	inositol polyphosphate phosphatase like 1	-0.481377	7.84203	77.9374	1.38e-05	0.000369572
4940	ENSG00000111331	OAS3	2'-5'-oligoadenylate synthetase 3	-0.406951	8.78944	77.8259	1.39e-05	0.000369572
58497	ENSG00000143363	PRUNE1	prune exopolyphosphatase 1	-0.496949	5.8229	77.9242	1.38e-05	0.000369572
80304	ENSG00000163026	WDCP	WD repeat and coiled coil containing	0.744806	3.50284	77.8255	1.39e-05	0.000369572
85446	ENSG00000136367	ZFHX2	zinc finger homeobox 2	-1.4751	3.48691	77.762	1.39e-05	0.000369921
4756	ENSG00000067141	NEO1	neogenin 1	-0.540354	6.52193	77.5327	1.41e-05	0.000373643
26959	ENSG00000105856	HBP1	HMG-box transcription factor 1	-0.582925	5.76534	77.3444	1.42e-05	0.000376634
26959	ENSG00000283847	HBP1	HMG-box transcription factor 1	-0.582925	5.76534	77.3444	1.42e-05	0.000376634
27173	ENSG00000143570	SLC39A1	solute carrier family 39 member 1	-0.457523	7.55142	77.274	1.43e-05	0.000377409
100125556	ENSG00000291071	FAM86JP	family with sequence similarity 86, member A pseudogene	1.03838	2.53064	77.1913	1.43e-05	0.00037842
90353	ENSG00000142544	CTU1	cytosolic thiouridylase subunit 1	0.95726	3.53231	77.0239	1.44e-05	0.000381064
55904	ENSG00000005483	KMT2E	lysine methyltransferase 2E (inactive)	-0.513224	6.75666	76.5694	1.48e-05	0.000389278
84881	ENSG00000165526	RPUSD4	RNA pseudouridine synthase D4	0.732892	3.97758	76.5447	1.48e-05	0.000389278
3964	ENSG00000116977	LGALS8	galectin 8	-0.553597	6.51131	76.4814	1.48e-05	0.000389674
56342	ENSG00000130810	PPAN	peter pan homolog	1.16173	2.35121	76.4664	1.49e-05	0.000389674
80267	ENSG00000116406	EDEM3	ER degradation enhancing alpha-mannosidase like protein 3	0.513576	6.64471	76.4367	1.49e-05	0.000389685
57146	ENSG00000011638	LDAF1	lipid droplet assembly factor 1	-0.619213	6.06114	76.3388	1.5e-05	0.000391056
23780	ENSG00000128335	APOL2	apolipoprotein L2	-0.636541	5.20251	76.2709	1.5e-05	0.000391834
84128	ENSG00000115368	WDR75	WD repeat domain 75	0.738437	6.2908	76.241	1.5e-05	0.000391855
56704	ENSG00000104369	JPH1	junctophilin 1	0.897963	4.38669	76.1622	1.51e-05	0.000392855
100093631	ENSG00000233369	GTF2IP4	general transcription factor IIi pseudogene 4	-0.661801	4.91958	76.1154	1.51e-05	0.000393049
10938	ENSG00000110047	EHD1	EH domain containing 1	0.573175	6.23593	76.0664	1.52e-05	0.000393049
64859	ENSG00000173559	NABP1	nucleic acid binding protein 1	1.20442	4.73307	76.0771	1.52e-05	0.000393049
55638	ENSG00000147642	SYBU	syntabulin	1.58358	2.09701	75.9456	1.53e-05	0.000394908
10401	ENSG00000131788	PIAS3	protein inhibitor of activated STAT 3	-0.68439	6.6253	75.6869	1.55e-05	0.000399601
2872	ENSG00000099875	MKNK2	MAPK interacting serine/threonine kinase 2	-0.814676	6.42602	75.5615	1.56e-05	0.000401293
7965	ENSG00000106305	AIMP2	aminoacyl tRNA synthetase complex interacting multifunctional protein 2	0.739775	5.34911	75.548	1.56e-05	0.000401293
10174	ENSG00000120896	SORBS3	sorbin and SH3 domain containing 3	-0.690436	5.10836	75.4243	1.57e-05	0.00040327
3157	ENSG00000112972	HMGCS1	3-hydroxy-3-methylglutaryl-CoA synthase 1	0.541179	8.49553	75.3619	1.57e-05	0.000403982
143458	ENSG00000179241	LDLRAD3	low density lipoprotein receptor class A domain containing 3	0.759999	3.61808	75.222	1.58e-05	0.0004058
8525	ENSG00000149091	DGKZ	diacylglycerol kinase zeta	0.411879	7.18093	75.2188	1.58e-05	0.0004058
26747	ENSG00000083635	NUFIP1	nuclear FMR1 interacting protein 1	0.674207	4.72275	75.0919	1.59e-05	0.000407292
7421	ENSG00000111424	VDR	vitamin D receptor	0.609542	4.93474	75.1007	1.59e-05	0.000407292
400793	ENSG00000239887	C1orf226	chromosome 1 open reading frame 226	1.56585	5.79214	81.2492	1.6e-05	0.00040933
347902	ENSG00000139211	AMIGO2	adhesion molecule with Ig like domain 2	-1.10755	7.32904	77.7759	1.61e-05	0.00041003
4889	ENSG00000164129	NPY5R	neuropeptide Y receptor Y5	1.12899	2.75289	74.8883	1.61e-05	0.00041003
7113	ENSG00000184012	TMPRSS2	transmembrane serine protease 2	-0.723211	6.18048	74.7403	1.62e-05	0.000412405
342527	ENSG00000188176	SMTNL2	smoothelin like 2	1.63574	2.36855	74.48	1.65e-05	0.000417433
5528	ENSG00000112640	PPP2R5D	protein phosphatase 2 regulatory subunit B'delta	-0.510772	5.80209	74.3933	1.65e-05	0.000418723
25962	ENSG00000164944	VIRMA	vir like m6A methyltransferase associated	-0.588172	7.72835	74.3254	1.66e-05	0.000419012
93436	ENSG00000105676	ARMC6	armadillo repeat containing 6	0.7522	5.541	74.3341	1.66e-05	0.000419012
29104	ENSG00000156239	N6AMT1	N-6 adenine-specific DNA methyltransferase 1	1.0391	3.47128	74.1623	1.67e-05	0.000421998
2288	ENSG00000004478	FKBP4	FKBP prolyl isomerase 4	0.804928	8.61598	74.0393	1.68e-05	0.000424121
23761	ENSG00000241878	PISD	phosphatidylserine decarboxylase	0.49152	6.72289	73.6428	1.72e-05	0.000432433
10056	ENSG00000116120	FARSB	phenylalanyl-tRNA synthetase subunit beta	0.592403	6.30475	73.5919	1.72e-05	0.000432981
64425	ENSG00000137054	POLR1E	RNA polymerase I subunit E	0.703916	3.90552	73.563	1.73e-05	0.000433027
9123	ENSG00000141526	SLC16A3	solute carrier family 16 member 3	-0.532267	4.99032	73.5138	1.73e-05	0.000433536
58190	ENSG00000144579	CTDSP1	CTD small phosphatase 1	-0.49947	6.8054	73.4582	1.74e-05	0.000434197
253980	ENSG00000174943	KCTD13	potassium channel tetramerization domain containing 13	0.567481	5.56306	73.4199	1.74e-05	0.000434461
8934	ENSG00000117280	RAB29	RAB29, member RAS oncogene family	-0.6075	5.87597	73.368	1.74e-05	0.000435042
101928841	NA	NA	NA	1.98764	0.558097	73.3201	1.75e-05	0.000435531
91298	ENSG00000133641	RLIG1	RNA 5'-phosphate and 3'-OH ligase 1	0.781753	4.3529	73.0978	1.77e-05	0.000440069
144811	ENSG00000179630	LACC1	laccase domain containing 1	0.921411	4.91958	72.9518	1.78e-05	0.00044287
57600	ENSG00000052795	FNIP2	folliculin interacting protein 2	0.921583	3.56397	72.838	1.79e-05	0.000444934
6307	ENSG00000052802	MSMO1	methylsterol monooxygenase 1	0.513654	7.18844	72.7127	1.81e-05	0.000446102
64777	ENSG00000145916	RMND5B	required for meiotic nuclear division 5 homolog B	-0.537186	7.02098	72.71	1.81e-05	0.000446102
9600	ENSG00000110697	PITPNM1	phosphatidylinositol transfer protein membrane associated 1	-0.780582	4.35463	72.7137	1.81e-05	0.000446102
6563	ENSG00000141469	SLC14A1	solute carrier family 14 member 1 (Kidd blood group)	2.29258	0.860372	72.6338	1.81e-05	0.000446671
8462	ENSG00000172059	KLF11	KLF transcription factor 11	0.579152	5.07541	72.6357	1.81e-05	0.000446671
6272	ENSG00000134243	SORT1	sortilin 1	-0.439574	7.42172	72.5616	1.82e-05	0.000447773
100499466	NA	LINC00674	long intergenic non-protein coding RNA 674	-0.387758	7.4306	72.5045	1.83e-05	0.000447896
127002	ENSG00000162650	ATXN7L2	ataxin 7 like 2	0.85449	3.26158	72.5154	1.83e-05	0.000447896
10455	ENSG00000198721	ECI2	enoyl-CoA delta isomerase 2	-0.660407	3.70701	72.4544	1.83e-05	0.000448473
1267	ENSG00000173786	CNP	2',3'-cyclic nucleotide 3' phosphodiesterase	-0.613968	4.92473	72.23	1.85e-05	0.000450119
23038	ENSG00000142784	WDTC1	WD and tetratricopeptide repeats 1	-0.488376	5.56874	72.204	1.86e-05	0.000450119
23498	ENSG00000162882	HAAO	3-hydroxyanthranilate 3,4-dioxygenase	2.36695	0.251603	72.1544	1.86e-05	0.000450119
25819	ENSG00000151014	NOCT	nocturnin	0.630821	4.39506	72.3166	1.84e-05	0.000450119
3572	ENSG00000134352	IL6ST	interleukin 6 cytokine family signal transducer	1.41806	5.94642	77.6573	1.86e-05	0.000450119
7003	ENSG00000187079	TEAD1	TEA domain transcription factor 1	0.51786	6.32664	72.1736	1.86e-05	0.000450119
8019	ENSG00000169925	BRD3	bromodomain containing 3	-0.503576	6.72692	72.2463	1.85e-05	0.000450119
83590	ENSG00000164897	TMUB1	transmembrane and ubiquitin like domain containing 1	-0.459195	5.80971	72.3053	1.85e-05	0.000450119
84864	ENSG00000170854	RIOX2	ribosomal oxygenase 2	1.22345	5.239	74.9047	1.86e-05	0.000450119
9805	ENSG00000136193	SCRN1	secernin 1	-0.413492	8.01935	72.3093	1.85e-05	0.000450119
54888	ENSG00000037474	NSUN2	NOP2/Sun RNA methyltransferase 2	0.436692	7.85659	71.9483	1.88e-05	0.000453904
6419	ENSG00000170364	SETMAR	SET domain and mariner transposase fusion gene	0.639828	4.33666	71.722	1.9e-05	0.000458847
339122	ENSG00000172780	RAB43	RAB43, member RAS oncogene family	-1.10874	2.09268	71.5741	1.92e-05	0.000461897
100507246	ENSG00000163597	SNHG16	small nucleolar RNA host gene 16	0.458086	6.4991	71.5229	1.93e-05	0.00046255
90525	ENSG00000138606	SHF	Src homology 2 domain containing F	-1.38051	2.10455	71.2593	1.95e-05	0.000468566
440503	ENSG00000214456	PLIN5	perilipin 5	1.28393	2.48261	71.1935	1.96e-05	0.000469606
57646	ENSG00000048028	USP28	ubiquitin specific peptidase 28	-0.623088	4.63022	71.1678	1.96e-05	0.000469626
6432	ENSG00000115875	SRSF7	serine and arginine rich splicing factor 7	0.662165	7.90584	71.1045	1.97e-05	0.000470607
26578	ENSG00000134996	OSTF1	osteoclast stimulating factor 1	0.735737	5.58921	70.8107	2e-05	0.000477555
27198	ENSG00000196917	HCAR1	hydroxycarboxylic acid receptor 1	-1.10051	4.36181	70.7444	2.01e-05	0.000478
9858	ENSG00000196422	PPP1R26	protein phosphatase 1 regulatory subunit 26	-0.647929	6.07006	70.7539	2.01e-05	0.000478
55222	ENSG00000172731	LRRC20	leucine rich repeat containing 20	-1.26748	3.39414	70.6781	2.02e-05	0.00047909
10208	ENSG00000132952	USPL1	ubiquitin specific peptidase like 1	0.5056	5.29586	70.4465	2.04e-05	0.000484553
9953	ENSG00000125430	HS3ST3B1	heparan sulfate-glucosamine 3-sulfotransferase 3B1	1.68115	0.621588	70.4039	2.05e-05	0.000485035
116986	ENSG00000135439	AGAP2	ArfGAP with GTPase domain, ankyrin repeat and PH domain 2	-0.974641	4.56085	70.3429	2.05e-05	0.00048601
54433	ENSG00000109534	GAR1	GAR1 ribonucleoprotein	0.690575	4.90534	70.1082	2.08e-05	0.000491665
10486	ENSG00000112186	CAP2	cyclase associated actin cytoskeleton regulatory protein 2	0.784069	5.95388	70.0528	2.09e-05	0.000492511
126433	ENSG00000161243	FBXO27	F-box protein 27	-0.711987	5.2048	69.7543	2.12e-05	0.000500027
11007	ENSG00000175602	CCDC85B	coiled-coil domain containing 85B	0.553077	5.57792	69.6791	2.13e-05	0.000500779
112	ENSG00000174233	ADCY6	adenylate cyclase 6	-0.606719	7.04633	69.6892	2.13e-05	0.000500779
7371	ENSG00000143179	UCK2	uridine-cytidine kinase 2	0.610864	6.20991	69.5929	2.14e-05	0.000501844
8607	ENSG00000175792	RUVBL1	RuvB like AAA ATPase 1	0.509656	6.69979	69.609	2.14e-05	0.000501844
79711	ENSG00000196497	IPO4	importin 4	0.461338	7.47912	69.4631	2.16e-05	0.000504528
79711	ENSG00000285248	IPO4	importin 4	0.461338	7.47912	69.4631	2.16e-05	0.000504528
9747	ENSG00000198420	TCAF1	TRPM8 channel associated factor 1	-0.526701	5.85306	69.4491	2.16e-05	0.000504528
22821	ENSG00000185989	RASA3	RAS p21 protein activator 3	0.522627	5.72558	69.3377	2.17e-05	0.000505503
22821	ENSG00000280477	RASA3	RAS p21 protein activator 3	0.522627	5.72558	69.3377	2.17e-05	0.000505503
23186	ENSG00000089902	RCOR1	REST corepressor 1	-0.403826	6.85514	69.3344	2.17e-05	0.000505503
594855	ENSG00000213578	CPLX3	complexin 3	3.52687	-0.101743	69.3885	2.16e-05	0.000505503
91801	ENSG00000137760	ALKBH8	alkB homolog 8, tRNA methyltransferase	0.860247	3.25323	69.3195	2.17e-05	0.000505503
54974	ENSG00000113272	THG1L	tRNA-histidine guanylyltransferase 1 like	0.739337	3.81558	69.228	2.18e-05	0.000507417
5971	ENSG00000104856	RELB	RELB proto-oncogene, NF-kB subunit	0.678582	4.40834	69.0173	2.21e-05	0.000512072
6446	ENSG00000118515	SGK1	serum/glucocorticoid regulated kinase 1	1.71768	3.0618	69.0396	2.21e-05	0.000512072
4149	ENSG00000125952	MAX	MYC associated factor X	0.54106	6.11399	68.953	2.22e-05	0.000512923
4163	ENSG00000171444	MCC	MCC regulator of WNT signaling pathway	-0.705658	4.05138	68.921	2.22e-05	0.000512923
9143	ENSG00000127561	SYNGR3	synaptogyrin 3	-0.86303	5.11463	68.9174	2.22e-05	0.000512923
9143	ENSG00000291941	SYNGR3	synaptogyrin 3	-0.86303	5.11463	68.9174	2.22e-05	0.000512923
4926	ENSG00000137497	NUMA1	nuclear mitotic apparatus protein 1	-0.437109	8.28572	68.8828	2.23e-05	0.000513249
55720	ENSG00000167721	TSR1	TSR1 ribosome maturation factor	0.392009	6.78603	68.7749	2.24e-05	0.000515686
55604	ENSG00000079691	CARMIL1	capping protein regulator and myosin 1 linker 1	-0.467733	5.93412	68.676	2.25e-05	0.00051788
1822	ENSG00000111676	ATN1	atrophin 1	-0.538658	6.51729	68.5376	2.27e-05	0.000521244
29984	ENSG00000173156	RHOD	ras homolog family member D	0.657376	5.18991	68.4736	2.28e-05	0.000522366
6520	ENSG00000168003	SLC3A2	solute carrier family 3 member 2	0.500122	8.87162	68.4533	2.28e-05	0.000522366
402778	ENSG00000244242	IFITM10	interferon induced transmembrane protein 10	0.959506	3.0033	68.2078	2.31e-05	0.000527888
402778	ENSG00000281618	IFITM10	interferon induced transmembrane protein 10	0.959506	3.0033	68.2078	2.31e-05	0.000527888
653	ENSG00000112175	BMP5	bone morphogenetic protein 5	1.99873	0.285475	68.1751	2.32e-05	0.000527888
729830	ENSG00000164142	FHIP1A	FHF complex subunit HOOK interacting protein 1A	-0.6481	4.39401	68.2128	2.31e-05	0.000527888
8303	ENSG00000184602	SNN	stannin	-0.96992	4.78449	68.1936	2.31e-05	0.000527888
4792	ENSG00000100906	NFKBIA	NFKB inhibitor alpha	-0.620895	8.23521	68.0576	2.33e-05	0.000530722
126567	ENSG00000183186	C2CD4C	C2 calcium dependent domain containing 4C	-1.38941	2.33968	67.9083	2.35e-05	0.000534541
1678	ENSG00000126953	TIMM8A	translocase of inner mitochondrial membrane 8A	0.714362	4.39857	67.8688	2.36e-05	0.00053505
3131	ENSG00000108924	HLF	HLF transcription factor, PAR bZIP family member	1.8049	1.34837	67.8049	2.37e-05	0.000535621
6016	ENSG00000143622	RIT1	Ras like without CAAX 1	-0.586751	5.36173	67.8202	2.36e-05	0.000535621
57128	ENSG00000214113	LYRM4	LYR motif containing 4	0.683692	3.67936	67.5541	2.4e-05	0.000541926
91947	ENSG00000140450	ARRDC4	arrestin domain containing 4	0.574475	6.12242	67.5728	2.4e-05	0.000541926
2004	ENSG00000111145	ELK3	ETS transcription factor ELK3	-0.967685	4.38693	67.4423	2.41e-05	0.000544367
7029	ENSG00000114126	TFDP2	transcription factor Dp-2	-0.47963	6.18235	67.4305	2.42e-05	0.000544367
80851	ENSG00000175137	SH3BP5L	SH3 binding domain protein 5 like	-0.45071	5.91107	67.3834	2.42e-05	0.000545136
28966	ENSG00000064652	SNX24	sorting nexin 24	0.797322	5.11866	67.1488	2.46e-05	0.000550712
3815	ENSG00000157404	KIT	KIT proto-oncogene, receptor tyrosine kinase	2.45235	-0.474361	67.1628	2.45e-05	0.000550712
79689	ENSG00000127954	STEAP4	STEAP4 metalloreductase	1.5855	0.567222	67.1388	2.46e-05	0.000550712
25959	ENSG00000197256	KANK2	KN motif and ankyrin repeat domains 2	-0.516273	5.79092	67.0869	2.46e-05	0.000551655
55200	ENSG00000008323	PLEKHG6	pleckstrin homology and RhoGEF domain containing G6	-0.962132	2.79366	67.0535	2.47e-05	0.000552013
7225	ENSG00000137672	TRPC6	transient receptor potential cation channel subfamily C member 6	3.8438	-1.28213	66.9936	2.48e-05	0.000553215
84985	ENSG00000147689	FAM83A	family with sequence similarity 83 member A	-0.693352	5.04521	66.9591	2.48e-05	0.000553613
84181	ENSG00000124177	CHD6	chromodomain helicase DNA binding protein 6	-0.477852	8.25239	66.9002	2.49e-05	0.000554789
254428	ENSG00000133065	SLC41A1	solute carrier family 41 member 1	-0.573985	5.41755	66.7715	2.51e-05	0.000558016
489	ENSG00000074370	ATP2A3	ATPase sarcoplasmic/endoplasmic reticulum Ca2+ transporting 3	-0.533477	8.15339	66.7556	2.51e-05	0.000558016
124402	ENSG00000153443	UBALD1	UBA like domain containing 1	0.509051	5.21645	66.6832	2.52e-05	0.000558943
55922	ENSG00000186416	NKRF	NFKB repressing factor	0.489157	5.41084	66.6931	2.52e-05	0.000558943
55922	ENSG00000292244	NKRF	NFKB repressing factor	0.489157	5.41084	66.6931	2.52e-05	0.000558943
10947	ENSG00000070718	AP3M2	adaptor related protein complex 3 subunit mu 2	0.577009	4.35611	66.5532	2.54e-05	0.000559647
120534	ENSG00000152219	ARL14EP	ADP ribosylation factor like GTPase 14 effector protein	0.626791	4.24077	66.5565	2.54e-05	0.000559647
22856	ENSG00000131873	CHSY1	chondroitin sulfate synthase 1	0.458973	6.32746	66.5678	2.54e-05	0.000559647
7486	ENSG00000165392	WRN	WRN RecQ like helicase	0.570805	4.50189	66.6085	2.53e-05	0.000559647
93622	ENSG00000170846	MRFAP1L2	Morf4 family associated protein 1 like 2	0.485332	5.60988	66.5858	2.54e-05	0.000559647
646862	ENSG00000269855	RNF225	ring finger protein 225	-1.75002	0.342614	66.465	2.55e-05	0.000561806
53944	ENSG00000169118	CSNK1G1	casein kinase 1 gamma 1	-0.429344	6.24022	66.2603	2.58e-05	0.000567794
54475	ENSG00000073536	NLE1	notchless homolog 1	0.628886	4.18383	66.2117	2.59e-05	0.000568689
200205	ENSG00000181873	IBA57	iron-sulfur cluster assembly factor IBA57	0.794577	4.11569	66.06	2.61e-05	0.000571591
23075	ENSG00000133789	SWAP70	switching B cell complex subunit SWAP70	-0.656498	4.52996	66.1019	2.61e-05	0.000571591
79666	ENSG00000175895	PLEKHF2	pleckstrin homology and FYVE domain containing 2	-0.654656	7.65595	66.0703	2.61e-05	0.000571591
4857	ENSG00000139910	NOVA1	NOVA alternative splicing regulator 1	-1.22762	2.73946	65.9892	2.63e-05	0.000571831
56894	ENSG00000160216	AGPAT3	1-acylglycerol-3-phosphate O-acyltransferase 3	-0.422763	6.90065	66.0146	2.62e-05	0.000571831
6340	ENSG00000166828	SCNN1G	sodium channel epithelial 1 subunit gamma	2.0934	1.59623	66.0069	2.62e-05	0.000571831
101927862	ENSG00000253978	TENM2-AS1	TENM2 antisense RNA 2	3.44714	-1.42999	65.9212	2.64e-05	0.000573324
10419	ENSG00000100462	PRMT5	protein arginine methyltransferase 5	0.415766	7.06583	65.8234	2.65e-05	0.000573324
140738	ENSG00000171227	TMEM37	transmembrane protein 37	-1.43008	1.37469	65.8107	2.65e-05	0.000573324
7132	ENSG00000067182	TNFRSF1A	TNF receptor superfamily member 1A	-0.433048	6.04459	65.8075	2.65e-05	0.000573324
83448	ENSG00000129317	PUS7L	pseudouridine synthase 7 like	0.741123	4.66384	65.8676	2.64e-05	0.000573324
84924	ENSG00000186017	ZNF566	zinc finger protein 566	0.860554	3.85128	65.82	2.65e-05	0.000573324
8760	ENSG00000101290	CDS2	CDP-diacylglycerol synthase 2	-0.522296	5.77524	65.7972	2.66e-05	0.000573324
51230	ENSG00000025293	PHF20	PHD finger protein 20	-0.463927	6.05434	65.7406	2.66e-05	0.000573918
57050	ENSG00000132467	UTP3	UTP3 small subunit processome component	0.46461	5.89259	65.7376	2.66e-05	0.000573918
55326	ENSG00000155189	AGPAT5	1-acylglycerol-3-phosphate O-acyltransferase 5	0.475775	5.64606	65.6667	2.68e-05	0.0005756
55326	ENSG00000284980	AGPAT5	1-acylglycerol-3-phosphate O-acyltransferase 5	0.475775	5.64606	65.6667	2.68e-05	0.0005756
55841	ENSG00000047644	WWC3	WWC family member 3	0.491917	6.71506	65.5942	2.69e-05	0.00057734
1408	ENSG00000121671	CRY2	cryptochrome circadian regulator 2	-0.520893	5.30658	65.4752	2.71e-05	0.000579388
57492	ENSG00000049618	ARID1B	AT-rich interaction domain 1B	0.73585	6.44101	65.5066	2.7e-05	0.000579388
79731	ENSG00000137513	NARS2	asparaginyl-tRNA synthetase 2, mitochondrial	0.583752	5.21166	65.4716	2.71e-05	0.000579388
23357	ENSG00000013523	ANGEL1	angel homolog 1	0.440766	6.31386	65.4456	2.71e-05	0.000579569
255324	ENSG00000182585	EPGN	epithelial mitogen	4.66495	-1.41678	65.4118	2.72e-05	0.000580018
29946	ENSG00000167565	SERTAD3	SERTA domain containing 3	-0.537162	5.45685	65.3046	2.73e-05	0.000582241
55149	ENSG00000107951	MTPAP	mitochondrial poly(A) polymerase	0.451665	5.9154	65.2758	2.74e-05	0.000582241
5595	ENSG00000102882	MAPK3	mitogen-activated protein kinase 3	-0.388221	7.56862	65.2645	2.74e-05	0.000582241
64856	ENSG00000179403	VWA1	von Willebrand factor A domain containing 1	-0.600275	4.95801	65.2775	2.74e-05	0.000582241
157567	ENSG00000186106	ANKRD46	ankyrin repeat domain 46	0.590736	4.66756	65.2026	2.75e-05	0.000583662
326624	ENSG00000172794	RAB37	RAB37, member RAS oncogene family	0.906003	3.47095	65.0473	2.77e-05	0.000588199
51063	ENSG00000138172	CALHM2	calcium homeostasis modulator family member 2	-0.555135	4.8561	65.0303	2.78e-05	0.000588199
84749	ENSG00000135093	USP30	ubiquitin specific peptidase 30	-0.719174	3.80902	64.9508	2.79e-05	0.000590259
7699	ENSG00000196387	ZNF140	zinc finger protein 140	0.550192	4.8972	64.8085	2.81e-05	0.000593282
8886	ENSG00000088205	DDX18	DEAD-box helicase 18	0.469779	7.39212	64.8036	2.81e-05	0.000593282
93010	ENSG00000156966	B3GNT7	UDP-GlcNAc:betaGal beta-1,3-N-acetylglucosaminyltransferase 7	-1.83175	0.332698	64.8297	2.81e-05	0.000593282
4744	ENSG00000100285	NEFH	neurofilament heavy chain	3.52133	-0.626797	64.7754	2.82e-05	0.000593564
85456	ENSG00000149115	TNKS1BP1	tankyrase 1 binding protein 1	-0.538461	6.91631	64.5749	2.85e-05	0.000599939
5420	ENSG00000128567	PODXL	podocalyxin like	0.809893	6.45278	64.5355	2.86e-05	0.00060063
11226	ENSG00000139629	GALNT6	polypeptide N-acetylgalactosaminyltransferase 6	-0.393669	7.59626	64.4655	2.87e-05	0.000601188
540	ENSG00000123191	ATP7B	ATPase copper transporting beta	-0.571557	4.66094	64.4595	2.87e-05	0.000601188
7546	ENSG00000043355	ZIC2	Zic family member 2	0.700903	3.68661	64.4401	2.88e-05	0.000601188
9770	ENSG00000101265	RASSF2	Ras association domain family member 2	-1.20433	2.80634	64.4763	2.87e-05	0.000601188
8460	ENSG00000169902	TPST1	tyrosylprotein sulfotransferase 1	-0.875599	3.13381	64.3856	2.89e-05	0.000602425
56902	ENSG00000115946	PNO1	partner of NOB1 homolog	0.856468	5.70699	64.3492	2.89e-05	0.000603022
57649	ENSG00000109118	PHF12	PHD finger protein 12	-0.478704	6.02597	64.3186	2.9e-05	0.00060341
54751	ENSG00000162458	FBLIM1	filamin binding LIM protein 1	-1.06663	3.14814	64.2448	2.91e-05	0.000605354
5083	ENSG00000198807	PAX9	paired box 9	0.969304	3.00624	64.1423	2.93e-05	0.000608348
23095	ENSG00000054523	KIF1B	kinesin family member 1B	-0.567992	6.39798	63.9707	2.96e-05	0.000612456
55072	ENSG00000092098	RNF31	ring finger protein 31	-0.495114	6.82471	63.9793	2.96e-05	0.000612456
55072	ENSG00000285152	RNF31	ring finger protein 31	-0.495114	6.82471	63.9793	2.96e-05	0.000612456
80067	ENSG00000115827	DCAF17	DDB1 and CUL4 associated factor 17	0.696914	5.11462	64.0083	2.95e-05	0.000612456
51451	ENSG00000205629	LCMT1	leucine carboxyl methyltransferase 1	0.46127	6.6781	63.8976	2.97e-05	0.000614385
57153	ENSG00000129353	SLC44A2	solute carrier family 44 member 2	-0.426887	8.03485	63.8602	2.98e-05	0.000614385
80820	ENSG00000122547	EEPD1	endonuclease/exonuclease/phosphatase family domain containing 1	2.17309	1.97071	63.8596	2.98e-05	0.000614385
5820	ENSG00000249859	PVT1	Pvt1 oncogene	0.551209	5.02687	63.7618	2.99e-05	0.000617278
100287482	ENSG00000240204	SMKR1	small lysine rich protein 1	1.2057	2.97219	63.7169	3e-05	0.000618223
752	ENSG00000184922	FMNL1	formin like 1	-0.930433	3.53792	63.6178	3.02e-05	0.000621188
11176	ENSG00000076108	BAZ2A	bromodomain adjacent to zinc finger domain 2A	-0.60022	7.84944	63.5927	3.03e-05	0.000621404
196993	ENSG00000225362	CT62	cancer/testis associated 62	1.48687	1.64243	63.4028	3.06e-05	0.000626368
54855	ENSG00000183508	TENT5C	terminal nucleotidyltransferase 5C	0.75243	4.81303	63.4124	3.06e-05	0.000626368
7753	ENSG00000166261	ZNF202	zinc finger protein 202	0.849443	3.77386	63.4197	3.06e-05	0.000626368
9238	ENSG00000136270	TBRG4	transforming growth factor beta regulator 4	0.418064	6.2845	63.3325	3.07e-05	0.000628303
5570	ENSG00000135549	PKIB	cAMP-dependent protein kinase inhibitor beta	1.09416	6.33218	65.5266	3.08e-05	0.000629276
9646	ENSG00000198730	CTR9	CTR9 homolog, Paf1/RNA polymerase II complex component	0.699149	5.98551	63.2715	3.08e-05	0.000629276
22880	ENSG00000133422	MORC2	MORC family CW-type zinc finger 2	0.39165	6.55498	63.2453	3.09e-05	0.000629436
9166	ENSG00000147654	EBAG9	estrogen receptor binding site associated antigen 9	0.505299	5.80101	63.1587	3.11e-05	0.000632013
6720	ENSG00000072310	SREBF1	sterol regulatory element binding transcription factor 1	-0.513684	7.90245	63.04	3.13e-05	0.00063584
9748	ENSG00000065613	SLK	STE20 like kinase	0.763935	7.04849	62.9628	3.14e-05	0.000638088
10743	ENSG00000108557	RAI1	retinoic acid induced 1	-0.55818	6.68068	62.9344	3.15e-05	0.000638455
10380	ENSG00000162813	BPNT1	3'(2'), 5'-bisphosphate nucleotidase 1	-0.48734	6.23535	62.8341	3.17e-05	0.000641621
53947	ENSG00000128274	A4GALT	alpha 1,4-galactosyltransferase (P blood group)	0.763429	4.63239	62.7517	3.18e-05	0.000644104
192134	ENSG00000198488	B3GNT6	UDP-GlcNAc:betaGal beta-1,3-N-acetylglucosaminyltransferase 6	4.72682	-1.70537	62.6494	3.2e-05	0.00064739
5352	ENSG00000152952	PLOD2	procollagen-lysine,2-oxoglutarate 5-dioxygenase 2	0.474514	8.02488	62.5456	3.22e-05	0.000650753
127829	ENSG00000143862	ARL8A	ADP ribosylation factor like GTPase 8A	-0.431197	6.16799	62.504	3.23e-05	0.000651666
9139	ENSG00000078699	CBFA2T2	CBFA2/RUNX1 partner transcriptional co-repressor 2	-0.707652	5.07132	62.4852	3.24e-05	0.000651673
10611	ENSG00000163110	PDLIM5	PDZ and LIM domain 5	0.984975	4.67066	62.374	3.26e-05	0.000654626
79603	ENSG00000090661	CERS4	ceramide synthase 4	-0.524283	5.09824	62.3824	3.26e-05	0.000654626
155382	ENSG00000176428	VPS37D	VPS37D subunit of ESCRT-I	-1.51424	2.02516	62.2005	3.29e-05	0.000659977
5819	ENSG00000130202	NECTIN2	nectin cell adhesion molecule 2	-0.424832	7.74705	62.2193	3.29e-05	0.000659977
84955	ENSG00000120526	NUDCD1	NudC domain containing 1	0.558404	6.36655	62.1855	3.3e-05	0.000659977
51116	ENSG00000122140	MRPS2	mitochondrial ribosomal protein S2	0.425517	5.94529	62.1082	3.31e-05	0.000662119
55924	ENSG00000197852	INKA2	inka box actin regulator 2	0.85376	4.29918	62.0959	3.31e-05	0.000662119
11264	ENSG00000101417	PXMP4	peroxisomal membrane protein 4	-0.57056	4.78484	62.0713	3.32e-05	0.000662369
9060	ENSG00000198682	PAPSS2	3'-phosphoadenosine 5'-phosphosulfate synthase 2	0.424591	7.23786	62.0281	3.33e-05	0.000663384
64778	ENSG00000075420	FNDC3B	fibronectin type III domain containing 3B	0.696929	6.03227	61.9549	3.34e-05	0.000665627
54961	ENSG00000172830	SSH3	slingshot protein phosphatase 3	-0.431739	6.87369	61.8787	3.36e-05	0.000668004
3927	ENSG00000002834	LASP1	LIM and SH3 protein 1	-0.439466	7.6987	61.8591	3.36e-05	0.000668059
100507524	ENSG00000243069	ARHGEF26-AS1	ARHGEF26 antisense RNA 1	1.8363	0.0899323	61.7713	3.38e-05	0.000670933
100507524	ENSG00000281157	ARHGEF26-AS1	ARHGEF26 antisense RNA 1	1.8363	0.0899323	61.7713	3.38e-05	0.000670933
26468	ENSG00000106852	LHX6	LIM homeobox 6	1.22282	1.42023	61.5336	3.43e-05	0.000677016
57787	ENSG00000007047	MARK4	microtubule affinity regulating kinase 4	-0.96508	4.73447	61.4808	3.44e-05	0.000677016
638	ENSG00000100290	BIK	BCL2 interacting killer	-1.0865	3.05577	61.5304	3.43e-05	0.000677016
652	ENSG00000125378	BMP4	bone morphogenetic protein 4	-0.762518	4.61809	61.5385	3.43e-05	0.000677016
7372	ENSG00000114491	UMPS	uridine monophosphate synthetase	0.781945	6.23397	61.4846	3.44e-05	0.000677016
79875	ENSG00000187720	THSD4	thrombospondin type 1 domain containing 4	0.56272	6.90469	61.5429	3.43e-05	0.000677016
91056	ENSG00000254470	AP5B1	adaptor related protein complex 5 subunit beta 1	-0.74198	5.01219	61.5099	3.44e-05	0.000677016
9486	ENSG00000115526	CHST10	carbohydrate sulfotransferase 10	1.04629	3.52335	61.5788	3.42e-05	0.000677016
171568	ENSG00000100413	POLR3H	RNA polymerase III subunit H	0.567085	5.31871	61.4512	3.45e-05	0.000677228
196383	ENSG00000150977	RILPL2	Rab interacting lysosomal protein like 2	-0.778673	3.58222	61.4399	3.45e-05	0.000677228
3182	ENSG00000197451	HNRNPAB	heterogeneous nuclear ribonucleoprotein A/B	0.52166	8.7685	61.3494	3.47e-05	0.000680289
10226	ENSG00000105355	PLIN3	perilipin 3	-0.412073	6.17749	61.1156	3.52e-05	0.000686447
116984	ENSG00000047365	ARAP2	ArfGAP with RhoGAP domain, ankyrin repeat and PH domain 2	0.777571	4.2802	61.1798	3.51e-05	0.000686447
1365	ENSG00000165215	CLDN3	claudin 3	-0.542435	7.09327	61.1294	3.52e-05	0.000686447
1789	ENSG00000088305	DNMT3B	DNA methyltransferase 3 beta	-0.514936	5.01933	61.1615	3.51e-05	0.000686447
64582	ENSG00000181619	GPR135	G protein-coupled receptor 135	1.01992	2.77095	61.1365	3.52e-05	0.000686447
3949	ENSG00000130164	LDLR	low density lipoprotein receptor	0.400024	7.61969	61.0425	3.54e-05	0.000688063
54955	ENSG00000116922	AIRIM	AFG2 interacting ribosome maturation factor	0.59541	4.18671	61.0595	3.53e-05	0.000688063
2494	ENSG00000116833	NR5A2	nuclear receptor subfamily 5 group A member 2	4.38991	1.46406	64.4213	3.57e-05	0.000693778
10745	ENSG00000116793	PHTF1	putative homeodomain transcription factor 1	-0.405228	5.988	60.8325	3.58e-05	0.000695614
100101467	ENSG00000186814	ZSCAN30	zinc finger and SCAN domain containing 30	-1.12059	3.5077	60.7681	3.6e-05	0.000697656
79954	ENSG00000115761	NOL10	nucleolar protein 10	0.437222	5.93356	60.7205	3.61e-05	0.000698975
4983	ENSG00000079482	OPHN1	oligophrenin 1	0.75655	3.96034	60.6104	3.63e-05	0.000703044
8945	ENSG00000166167	BTRC	beta-transducin repeat containing E3 ubiquitin protein ligase	-0.575236	4.72421	60.5205	3.65e-05	0.000706252
80256	ENSG00000005238	ATOSB	atos homolog B	-1.23839	3.6365	60.4861	3.66e-05	0.000707008
9730	ENSG00000145041	DCAF1	DDB1 and CUL4 associated factor 1	0.481946	5.88287	60.4251	3.68e-05	0.00070895
55454	ENSG00000169826	CSGALNACT2	chondroitin sulfate N-acetylgalactosaminyltransferase 2	0.57629	4.40695	60.2733	3.71e-05	0.000714981
10915	ENSG00000113649	TCERG1	transcription elongation regulator 1	0.407336	6.5728	60.155	3.74e-05	0.000717402
116931	ENSG00000144893	MED12L	mediator complex subunit 12L	-0.638185	5.05873	60.2024	3.73e-05	0.000717402
169200	ENSG00000180694	TMEM64	transmembrane protein 64	0.880886	8.07934	62.2777	3.73e-05	0.000717402
7041	ENSG00000140682	TGFB1I1	transforming growth factor beta 1 induced transcript 1	-1.03968	3.14704	60.1509	3.74e-05	0.000717402
55787	ENSG00000086712	TXLNG	taxilin gamma	0.481725	5.7744	59.9684	3.78e-05	0.000724947
5164	ENSG00000005882	PDK2	pyruvate dehydrogenase kinase 2	-0.611783	4.44012	59.8142	3.82e-05	0.000731277
79730	ENSG00000179299	NSUN7	NOP2/Sun RNA methyltransferase family member 7	-0.801356	3.35712	59.764	3.83e-05	0.00073282
100499467	ENSG00000227036	LINC00673	long intergenic non-protein coding RNA 673	3.15931	-0.286065	59.6729	3.85e-05	0.000736281
23239	ENSG00000081913	PHLPP1	PH domain and leucine rich repeat protein phosphatase 1	-0.952874	2.938	59.4922	3.9e-05	0.000740015
23612	ENSG00000174307	PHLDA3	pleckstrin homology like domain family A member 3	-0.437346	6.46288	59.5078	3.9e-05	0.000740015
7328	ENSG00000186591	UBE2H	ubiquitin conjugating enzyme E2 H	-0.428407	7.56771	59.5518	3.88e-05	0.000740015
7942	ENSG00000112561	TFEB	transcription factor EB	-1.66293	1.26629	59.5702	3.88e-05	0.000740015
9722	ENSG00000198929	NOS1AP	nitric oxide synthase 1 adaptor protein	1.56462	4.56816	62.7642	3.89e-05	0.000740015
9949	ENSG00000101935	AMMECR1	AMMECR nuclear protein 1	0.577484	5.50661	59.5171	3.89e-05	0.000740015
65244	ENSG00000123352	SPATS2	spermatogenesis associated serine rich 2	-0.53508	6.30744	59.4259	3.92e-05	0.000742352
79958	ENSG00000205744	DENND1C	DENN domain containing 1C	-0.714162	3.96019	59.3101	3.95e-05	0.000747069
55703	ENSG00000013503	POLR3B	RNA polymerase III subunit B	0.937297	4.04932	59.2144	3.97e-05	0.000750852
27242	ENSG00000146072	TNFRSF21	TNF receptor superfamily member 21	0.75948	5.30883	59.1736	3.98e-05	0.000751946
399694	ENSG00000185634	SHC4	SHC adaptor protein 4	1.04741	2.20883	59.1584	3.98e-05	0.000751946
23499	ENSG00000127603	MACF1	microtubule actin crosslinking factor 1	0.585584	7.63282	59.1121	4e-05	0.000753377
151473	ENSG00000163053	SLC16A14	solute carrier family 16 member 14	-0.56425	4.24982	59.0927	4e-05	0.000753517
4643	ENSG00000157483	MYO1E	myosin IE	0.428267	5.77395	58.9981	4.02e-05	0.000757298
26097	ENSG00000160679	CHTOP	chromatin target of PRMT1	0.425346	7.00315	58.96	4.03e-05	0.00075835
55759	ENSG00000138442	WDR12	WD repeat domain 12	0.565122	5.63953	58.8444	4.06e-05	0.000763203
90060	ENSG00000147144	CCDC120	coiled-coil domain containing 120	-0.802	4.21147	58.7917	4.08e-05	0.000764988
90060	ENSG00000292279	CCDC120	coiled-coil domain containing 120	-0.802	4.21147	58.7917	4.08e-05	0.000764988
64412	ENSG00000125812	GZF1	GDNF inducible zinc finger protein 1	0.434733	5.60172	58.7542	4.09e-05	0.000766027
151195	ENSG00000163249	CCNYL1	cyclin Y like 1	0.694901	5.03621	58.6691	4.11e-05	0.000767149
338382	ENSG00000276600	RAB7B	RAB7B, member RAS oncogene family	4.85283	-2.01714	58.6688	4.11e-05	0.000767149
55316	ENSG00000136444	RSAD1	radical S-adenosyl methionine domain containing 1	0.434556	5.33571	58.6661	4.11e-05	0.000767149
57597	ENSG00000266074	BAHCC1	BAH domain and coiled-coil containing 1	-0.795809	5.03393	58.6946	4.1e-05	0.000767149
57597	ENSG00000291421	BAHCC1	BAH domain and coiled-coil containing 1	-0.795809	5.03393	58.6946	4.1e-05	0.000767149
54894	ENSG00000108375	RNF43	ring finger protein 43	-0.868867	5.34723	58.5798	4.13e-05	0.000770622
128272	ENSG00000142632	ARHGEF19	Rho guanine nucleotide exchange factor 19	-1.01966	3.82183	58.5398	4.15e-05	0.000771543
128272	ENSG00000291381	ARHGEF19	Rho guanine nucleotide exchange factor 19	-1.01966	3.82183	58.5398	4.15e-05	0.000771543
27030	ENSG00000119684	MLH3	mutL homolog 3	0.528492	5.61535	58.5126	4.15e-05	0.000771543
30815	ENSG00000160408	ST6GALNAC6	ST6 N-acetylgalactosaminide alpha-2,6-sialyltransferase 6	-0.505371	5.02378	58.525	4.15e-05	0.000771543
91373	ENSG00000197355	UAP1L1	UDP-N-acetylglucosamine pyrophosphorylase 1 like 1	-1.07012	5.6765	60.3434	4.2e-05	0.000779263
9537	ENSG00000175274	TP53I11	tumor protein p53 inducible protein 11	-0.387155	7.12144	58.2991	4.21e-05	0.00078066
192111	ENSG00000247077	PGAM5	PGAM family member 5, mitochondrial serine/threonine protein phosphatase	0.420703	6.43244	58.2663	4.22e-05	0.000781479
83660	ENSG00000171914	TLN2	talin 2	0.624488	4.88468	58.2507	4.22e-05	0.000781479
80144	ENSG00000138759	FRAS1	Fraser extracellular matrix complex subunit 1	0.588466	5.53166	58.2198	4.23e-05	0.000782235
79966	ENSG00000145284	SCD5	stearoyl-CoA desaturase 5	-1.04525	4.603	58.1636	4.25e-05	0.000783856
83743	ENSG00000105447	GRWD1	glutamate rich WD repeat containing 1	0.823145	6.21482	58.1559	4.25e-05	0.000783856
3354	ENSG00000168830	HTR1E	5-hydroxytryptamine receptor 1E	1.44985	1.17469	58.0999	4.27e-05	0.000785527
58489	ENSG00000136379	ABHD17C	abhydrolase domain containing 17C, depalmitoylase	0.645154	6.59185	58.0753	4.27e-05	0.000785527
92359	ENSG00000130545	CRB3	crumbs cell polarity complex component 3	-0.576843	4.3164	58.0865	4.27e-05	0.000785527
113263	ENSG00000106415	GLCCI1	glucocorticoid induced 1	0.485885	5.53187	58.0591	4.28e-05	0.000785542
7804	ENSG00000157193	LRP8	LDL receptor related protein 8	0.759183	6.00968	58.0431	4.28e-05	0.000785547
23616	ENSG00000100092	SH3BP1	SH3 domain binding protein 1	-1.19856	2.96816	57.7342	4.37e-05	0.000798898
57680	ENSG00000100888	CHD8	chromodomain helicase DNA binding protein 8	-0.363648	7.89948	57.7471	4.36e-05	0.000798898
79862	ENSG00000188295	ZNF669	zinc finger protein 669	0.641866	4.09435	57.7659	4.36e-05	0.000798898
9848	ENSG00000198948	MFAP3L	microfibril associated protein 3 like	-0.608082	5.78319	57.7218	4.37e-05	0.000798898
83541	ENSG00000125898	FAM110A	family with sequence similarity 110 member A	-0.464146	5.19742	57.5772	4.41e-05	0.000804849
9718	ENSG00000145194	ECE2	endothelin converting enzyme 2	0.683384	4.72212	57.581	4.41e-05	0.000804849
79833	ENSG00000152147	GEMIN6	gem nuclear organelle associated protein 6	0.528045	4.55294	57.5341	4.43e-05	0.0008063
388389	ENSG00000167131	CCDC103	coiled-coil domain containing 103	-1.21756	1.8726	57.4359	4.46e-05	0.000810692
147463	ENSG00000154065	ANKRD29	ankyrin repeat domain 29	1.54965	0.566581	57.406	4.46e-05	0.000811453
5782	ENSG00000127947	PTPN12	protein tyrosine phosphatase non-receptor type 12	-0.46243	7.01605	57.3626	4.48e-05	0.00081294
6671	ENSG00000105866	SP4	Sp4 transcription factor	0.76017	3.65936	57.2433	4.51e-05	0.000818522
140809	ENSG00000271303	SRXN1	sulfiredoxin 1	0.394578	6.65738	57.2053	4.52e-05	0.000819734
23105	ENSG00000053108	FSTL4	follistatin like 4	0.721337	3.16545	57.1746	4.53e-05	0.00082056
1352	ENSG00000006695	COX10	cytochrome c oxidase assembly factor heme A:farnesyltransferase COX10	0.582543	4.384	57.1328	4.54e-05	0.000821548
5585	ENSG00000123143	PKN1	protein kinase N1	-0.354641	7.34449	57.1255	4.55e-05	0.000821548
51366	ENSG00000104517	UBR5	ubiquitin protein ligase E3 component n-recognin 5	-0.366053	8.89122	57.0976	4.56e-05	0.000822226
1397	ENSG00000182809	CRIP2	cysteine rich protein 2	-0.403909	7.80793	57.0798	4.56e-05	0.000822357
3845	ENSG00000133703	KRAS	KRAS proto-oncogene, GTPase	-0.535408	5.70057	56.9853	4.59e-05	0.000826676
200407	ENSG00000175874	CREG2	cellular repressor of E1A stimulated genes 2	1.19141	2.03592	56.945	4.6e-05	0.000828043
102724159	ENSG00000275464	LOC102724159	periodic tryptophan protein 2 homolog	0.701312	3.32327	56.8766	4.62e-05	0.000830122
6949	ENSG00000070814	TCOF1	treacle ribosome biogenesis factor 1	0.391118	6.14627	56.888	4.62e-05	0.000830122
241	ENSG00000132965	ALOX5AP	arachidonate 5-lipoxygenase activating protein	3.42426	-1.75989	56.8259	4.64e-05	0.000831236
5583	ENSG00000027075	PRKCH	protein kinase C eta	-0.47099	5.56949	56.836	4.64e-05	0.000831236
57655	ENSG00000089351	GRAMD1A	GRAM domain containing 1A	-0.749749	5.66732	56.7896	4.65e-05	0.000832401
7391	ENSG00000158773	USF1	upstream transcription factor 1	-0.503679	5.38263	56.7172	4.67e-05	0.000835571
254042	ENSG00000172878	METAP1D	methionyl aminopeptidase type 1D, mitochondrial	0.810631	3.16738	56.6894	4.68e-05	0.000836275
254042	ENSG00000292097	METAP1D	methionyl aminopeptidase type 1D, mitochondrial	0.810631	3.16738	56.6894	4.68e-05	0.000836275
6522	ENSG00000164889	SLC4A2	solute carrier family 4 member 2	-0.41834	8.02912	56.6393	4.7e-05	0.000838222
8942	ENSG00000115919	KYNU	kynureninase	-0.476778	8.09873	56.6134	4.7e-05	0.000838822
64219	ENSG00000181191	PJA1	praja ring finger ubiquitin ligase 1	-0.657662	3.61466	56.5391	4.73e-05	0.00084214
140467	ENSG00000198816	ZNF358	zinc finger protein 358	-0.674987	4.04402	56.4761	4.75e-05	0.000843658
55540	ENSG00000056736	IL17RB	interleukin 17 receptor B	0.759761	3.80366	56.4939	4.74e-05	0.000843658
79671	ENSG00000160703	NLRX1	NLR family member X1	-0.944618	2.61329	56.467	4.75e-05	0.000843658
7042	ENSG00000092969	TGFB2	transforming growth factor beta 2	1.47859	3.34957	56.4913	4.78e-05	0.000848414
10196	ENSG00000185238	PRMT3	protein arginine methyltransferase 3	0.61343	5.19356	56.3362	4.79e-05	0.000849363
54931	ENSG00000174173	TRMT10C	tRNA methyltransferase 10C, mitochondrial RNase P subunit	0.606376	6.0131	56.2223	4.83e-05	0.000855015
80018	ENSG00000111300	NAA25	N-alpha-acetyltransferase 25, NatB auxiliary subunit	0.44098	6.35199	56.185	4.84e-05	0.000856297
84717	ENSG00000167674	HDGFL2	HDGF like 2	-0.594177	5.9561	56.0638	4.88e-05	0.000862436
8864	ENSG00000132326	PER2	period circadian regulator 2	0.575447	5.2769	56.0372	4.89e-05	0.000863118
123263	ENSG00000103707	MTFMT	mitochondrial methionyl-tRNA formyltransferase	0.61283	4.01895	55.9568	4.92e-05	0.000865211
3398	ENSG00000115738	ID2	inhibitor of DNA binding 2	-0.613248	6.40159	55.9583	4.92e-05	0.000865211
50805	ENSG00000113430	IRX4	iroquois homeobox 4	-0.538232	4.64252	55.9722	4.91e-05	0.000865211
22849	ENSG00000107864	CPEB3	cytoplasmic polyadenylation element binding protein 3	-0.926142	2.58916	55.937	4.92e-05	0.000865503
2188	ENSG00000183161	FANCF	FA complementation group F	0.520397	5.2482	55.6302	5.03e-05	0.000882739
65998	ENSG00000188070	ZFTA	zinc finger translocation associated	-1.39186	3.58718	56.0279	5.03e-05	0.000883541
3607	ENSG00000141568	FOXK2	forkhead box K2	0.374591	7.11785	55.52	5.06e-05	0.000885839
81621	ENSG00000107821	KAZALD1	Kazal type serine peptidase inhibitor domain 1	-0.512777	5.20694	55.5468	5.05e-05	0.000885839
81928	ENSG00000149679	CABLES2	Cdk5 and Abl enzyme substrate 2	-0.863063	5.26614	55.5242	5.06e-05	0.000885839
3936	ENSG00000136167	LCP1	lymphocyte cytosolic protein 1	0.45843	6.05375	55.4609	5.08e-05	0.000886581
5154	ENSG00000197461	PDGFA	platelet derived growth factor subunit A	-0.627433	5.12532	55.4734	5.08e-05	0.000886581
55718	ENSG00000058600	POLR3E	RNA polymerase III subunit E	0.497968	6.60404	55.4633	5.08e-05	0.000886581
55718	ENSG00000284282	POLR3E	RNA polymerase III subunit E	0.497968	6.60404	55.4633	5.08e-05	0.000886581
57520	ENSG00000138411	HECW2	HECT, C2 and WW domain containing E3 ubiquitin protein ligase 2	0.893299	5.66923	55.5699	5.09e-05	0.000886581
1107	ENSG00000170004	CHD3	chromodomain helicase DNA binding protein 3	-0.377314	8.0994	55.3918	5.11e-05	0.000889187
10867	ENSG00000011105	TSPAN9	tetraspanin 9	-0.710654	3.21889	55.2462	5.16e-05	0.000895234
1489	ENSG00000150281	CTF1	cardiotrophin 1	-0.627171	3.49236	55.1869	5.18e-05	0.000895234
22994	ENSG00000141577	CEP131	centrosomal protein 131	-0.72042	4.18415	55.2126	5.17e-05	0.000895234
26503	ENSG00000119899	SLC17A5	solute carrier family 17 member 5	-0.696129	4.54176	55.1801	5.18e-05	0.000895234
348180	ENSG00000174177	CTU2	cytosolic thiouridylase subunit 2	0.639386	4.77094	55.1771	5.18e-05	0.000895234
379	ENSG00000175906	ARL4D	ADP ribosylation factor like GTPase 4D	-1.71362	0.498104	55.2697	5.15e-05	0.000895234
5493	ENSG00000118898	PPL	periplakin	-0.624763	6.77843	55.2467	5.16e-05	0.000895234
83544	ENSG00000119661	DNAL1	dynein axonemal light chain 1	-0.628189	4.12618	55.2132	5.17e-05	0.000895234
7357	ENSG00000148154	UGCG	UDP-glucose ceramide glucosyltransferase	0.428233	7.1556	55.1494	5.19e-05	0.000896049
7743	ENSG00000136870	ZNF189	zinc finger protein 189	-0.71205	3.29401	55.1005	5.21e-05	0.000898165
8495	ENSG00000166387	PPFIBP2	PPFIA binding protein 2	-0.804584	3.38429	55.0763	5.22e-05	0.000898779
201292	ENSG00000141569	TRIM65	tripartite motif containing 65	0.462967	5.02471	55.0458	5.23e-05	0.000899778
283551	ENSG00000214900	LINC01588	long intergenic non-protein coding RNA 1588	1.22978	3.01671	54.997	5.25e-05	0.000901559
8660	ENSG00000185950	IRS2	insulin receptor substrate 2	1.00914	5.52532	56.8188	5.25e-05	0.000901559
83667	ENSG00000130766	SESN2	sestrin 2	-0.531647	5.07029	54.808	5.31e-05	0.000911881
83667	ENSG00000285069	SESN2	sestrin 2	-0.531647	5.07029	54.808	5.31e-05	0.000911881
2218	ENSG00000106692	FKTN	fukutin	0.460399	5.45983	54.7393	5.34e-05	0.000912316
23048	ENSG00000187239	FNBP1	formin binding protein 1	-0.482938	5.9699	54.7447	5.34e-05	0.000912316
23678	ENSG00000104205	SGK3	serum/glucocorticoid regulated kinase family member 3	2.01262	-0.151878	54.7135	5.35e-05	0.000912316
6431	ENSG00000124193	SRSF6	serine and arginine rich splicing factor 6	0.560072	8.06833	54.7652	5.33e-05	0.000912316
79885	ENSG00000163517	HDAC11	histone deacetylase 11	0.507169	5.61291	54.764	5.33e-05	0.000912316
80204	ENSG00000138081	FBXO11	F-box protein 11	-0.409824	6.5077	54.7097	5.35e-05	0.000912316
8458	ENSG00000116830	TTF2	transcription termination factor 2	0.431609	7.13217	54.7025	5.35e-05	0.000912316
3221	ENSG00000198353	HOXC4	homeobox C4	-1.46341	1.15001	54.6616	5.37e-05	0.000913127
84708	ENSG00000072201	LNX1	ligand of numb-protein X 1	-0.777462	3.14327	54.6676	5.37e-05	0.000913127
1796	ENSG00000115325	DOK1	docking protein 1	0.610375	3.75357	54.6045	5.39e-05	0.000915842
3954	ENSG00000168924	LETM1	leucine zipper and EF-hand containing transmembrane protein 1	0.423883	6.41504	54.5154	5.42e-05	0.000920594
65243	ENSG00000187801	ZFP69B	ZFP69 zinc finger protein B	1.27489	1.92016	54.4732	5.44e-05	0.000922387
10717	ENSG00000134262	AP4B1	adaptor related protein complex 4 subunit beta 1	0.510128	5.8416	54.3372	5.49e-05	0.000929519
8693	ENSG00000257594	GALNT4	polypeptide N-acetylgalactosaminyltransferase 4	1.4387	1.31966	54.3339	5.49e-05	0.000929519
55153	ENSG00000198301	SDAD1	SDA1 domain containing 1	0.713108	6.00245	54.2054	5.54e-05	0.000936921
51177	ENSG00000023902	PLEKHO1	pleckstrin homology domain containing O1	-0.741649	3.2107	54.1741	5.55e-05	0.000938055
2041	ENSG00000146904	EPHA1	EPH receptor A1	-0.791007	5.10699	54.0507	5.6e-05	0.000945215
2041	ENSG00000284816	EPHA1	EPH receptor A1	-0.791007	5.10699	54.0507	5.6e-05	0.000945215
23405	ENSG00000100697	DICER1	dicer 1, ribonuclease III	0.419008	7.67377	53.9287	5.65e-05	0.000952355
23466	ENSG00000183741	CBX6	chromobox 6	-0.496652	7.38924	53.8533	5.68e-05	0.000956455
25902	ENSG00000120254	MTHFD1L	methylenetetrahydrofolate dehydrogenase (NADP+ dependent) 1 like	0.58125	5.82561	53.6859	5.74e-05	0.000966762
10220	ENSG00000135414	GDF11	growth differentiation factor 11	-0.687473	4.90456	53.6507	5.76e-05	0.000968226
57678	ENSG00000119927	GPAM	glycerol-3-phosphate acyltransferase, mitochondrial	0.518181	4.56442	53.6012	5.78e-05	0.00097066
55749	ENSG00000060339	CCAR1	cell division cycle and apoptosis regulator 1	0.459503	6.7535	53.5773	5.79e-05	0.000971359
145567	ENSG00000165914	TTC7B	tetratricopeptide repeat domain 7B	-0.498904	5.05053	53.5235	5.81e-05	0.0009741
27346	ENSG00000109084	TMEM97	transmembrane protein 97	0.464311	5.44956	53.4753	5.83e-05	0.000975203
55695	ENSG00000130305	NSUN5	NOP2/Sun RNA methyltransferase 5	0.388734	5.77339	53.4912	5.82e-05	0.000975203
63892	ENSG00000115970	THADA	THADA armadillo repeat containing	0.408198	5.86983	53.4569	5.84e-05	0.000975203
81569	ENSG00000117148	ACTL8	actin like 8	2.66007	-0.379009	53.4534	5.84e-05	0.000975203
80146	ENSG00000115652	UXS1	UDP-glucuronate decarboxylase 1	0.400454	5.85546	53.4254	5.85e-05	0.000976198
26011	ENSG00000149256	TENM4	teneurin transmembrane protein 4	1.65083	3.46083	55.1557	5.86e-05	0.000976727
5601	ENSG00000050748	MAPK9	mitogen-activated protein kinase 9	-0.405228	6.59209	53.358	5.88e-05	0.000978977
64785	ENSG00000181938	GINS3	GINS complex subunit 3	0.908875	4.18199	53.3313	5.89e-05	0.000979894
23270	ENSG00000187189	TSPYL4	TSPY like 4	-0.427658	6.0759	53.2927	5.9e-05	0.000980709
84552	ENSG00000178184	PARD6G	par-6 family cell polarity regulator gamma	-0.939765	2.80129	53.2964	5.9e-05	0.000980709
90203	ENSG00000124104	SNX21	sorting nexin family member 21	-0.694648	4.60565	53.2337	5.93e-05	0.000983862
148479	ENSG00000116273	PHF13	PHD finger protein 13	-0.513715	5.17363	53.201	5.94e-05	0.000984285
1820	ENSG00000116017	ARID3A	AT-rich interaction domain 3A	-1.18506	4.94238	54.9448	5.94e-05	0.000984285
25840	ENSG00000185432	TMT1A	thiol methyltransferase 1A	-0.967865	3.84429	53.1063	5.98e-05	0.000988101
8013	ENSG00000119508	NR4A3	nuclear receptor subfamily 4 group A member 3	1.43169	2.11785	53.132	5.97e-05	0.000988101
8309	ENSG00000168306	ACOX2	acyl-CoA oxidase 2	2.19586	0.388908	53.1125	5.98e-05	0.000988101
158405	ENSG00000165185	KIAA1958	KIAA1958	-0.609933	4.66516	53.0489	6.01e-05	0.000990262
389524	ENSG00000174428	GTF2IRD2B	GTF2I repeat domain containing 2B	0.752441	4.03339	53.0516	6.01e-05	0.000990262
129401	ENSG00000163002	NUP35	nucleoporin 35	0.902074	4.96159	52.9453	6.05e-05	0.000995985
91523	ENSG00000179715	PCED1B	PC-esterase domain containing 1B	-0.939204	3.36606	52.9409	6.05e-05	0.000995985
10758	ENSG00000056972	TRAF3IP2	TRAF3 interacting protein 2	0.402774	5.8683	52.892	6.07e-05	0.000996657
6674	ENSG00000104450	SPAG1	sperm associated antigen 1	0.635624	4.88709	52.9173	6.06e-05	0.000996657
79718	ENSG00000177565	TBL1XR1	TBL1X/Y related 1	-0.425903	6.17756	52.8977	6.07e-05	0.000996657
6926	ENSG00000135111	TBX3	T-box transcription factor 3	-1.21463	3.23302	52.8371	6.1e-05	0.000999614
149428	ENSG00000163141	BNIPL	BCL2 interacting protein like	-0.625284	3.73847	52.8084	6.11e-05	0.00100025
473	ENSG00000142599	RERE	arginine-glutamic acid dipeptide repeats	-0.423597	5.94003	52.802	6.11e-05	0.00100025
3092	ENSG00000127946	HIP1	huntingtin interacting protein 1	-0.417687	7.22363	52.6749	6.17e-05	0.00100837
56155	ENSG00000121101	TEX14	testis expressed 14, intercellular bridge forming factor	0.960633	4.6777	52.6295	6.19e-05	0.00101027
8991	ENSG00000143416	SELENBP1	selenium binding protein 1	-0.367785	7.3023	52.6225	6.19e-05	0.00101027
54790	ENSG00000168769	TET2	tet methylcytosine dioxygenase 2	0.458605	6.18784	52.5654	6.22e-05	0.00101344
23187	ENSG00000019144	PHLDB1	pleckstrin homology like domain family B member 1	-0.822336	3.92776	52.5515	6.22e-05	0.00101351
56829	ENSG00000105939	ZC3HAV1	zinc finger CCCH-type containing, antiviral 1	-0.330226	7.57019	52.516	6.24e-05	0.00101514
84133	ENSG00000183579	ZNRF3	zinc and ring finger 3	0.562181	4.61496	52.4869	6.25e-05	0.00101631
57484	ENSG00000170153	RNF150	ring finger protein 150	0.631762	3.72873	52.4495	6.27e-05	0.00101716
7706	ENSG00000121060	TRIM25	tripartite motif containing 25	-0.562532	7.93126	52.4366	6.27e-05	0.00101716
868	ENSG00000114423	CBLB	Cbl proto-oncogene B	-0.482167	4.59161	52.4426	6.27e-05	0.00101716
3431	ENSG00000135899	SP110	SP110 nuclear body protein	-0.615532	6.1757	52.3974	6.29e-05	0.00101907
81792	ENSG00000151388	ADAMTS12	ADAM metallopeptidase with thrombospondin type 1 motif 12	2.96112	0.754308	52.301	6.33e-05	0.00102517
81792	ENSG00000281690	ADAMTS12	ADAM metallopeptidase with thrombospondin type 1 motif 12	2.96112	0.754308	52.301	6.33e-05	0.00102517
10451	ENSG00000134215	VAV3	vav guanine nucleotide exchange factor 3	-0.425349	5.90718	52.218	6.37e-05	0.00102939
51523	ENSG00000171604	CXXC5	CXXC finger protein 5	0.347519	7.92007	52.2184	6.37e-05	0.00102939
5874	ENSG00000041353	RAB27B	RAB27B, member RAS oncogene family	-0.639514	5.28035	52.161	6.4e-05	0.00103266
152518	ENSG00000170448	NFXL1	nuclear transcription factor, X-box binding like 1	0.513203	4.59411	52.126	6.41e-05	0.0010343
150223	ENSG00000161179	YDJC	YdjC chitooligosaccharide deacetylase homolog	0.636901	5.60643	52.0672	6.44e-05	0.00103678
9980	ENSG00000142197	DOP1B	DOP1 leucine zipper like protein B	0.357558	7.49622	52.0719	6.44e-05	0.00103678
10523	ENSG00000085872	CHERP	calcium homeostasis endoplasmic reticulum protein	0.405373	6.06975	52.0287	6.46e-05	0.00103871
8567	ENSG00000110514	MADD	MAP kinase activating death domain	-0.362085	6.83411	51.9881	6.48e-05	0.00104079
29902	ENSG00000204856	FAM216A	family with sequence similarity 216 member A	0.678184	3.19899	51.8773	6.53e-05	0.00104817
9351	ENSG00000065054	NHERF2	NHERF family PDZ scaffold protein 2	-0.375453	7.06487	51.8265	6.55e-05	0.00105105
10461	ENSG00000153208	MERTK	MER proto-oncogene, tyrosine kinase	1.33327	2.01126	51.7637	6.58e-05	0.00105391
57198	ENSG00000143515	ATP8B2	ATPase phospholipid transporting 8B2	-0.613746	6.58128	51.7647	6.58e-05	0.00105391
163051	ENSG00000242852	ZNF709	zinc finger protein 709	-0.946582	2.41938	51.7088	6.61e-05	0.00105713
3569	ENSG00000136244	IL6	interleukin 6	1.57775	1.38292	51.5437	6.69e-05	0.00106789
84930	ENSG00000120539	MASTL	microtubule associated serine/threonine kinase like	-0.412404	6.32961	51.5451	6.69e-05	0.00106789
1017	ENSG00000123374	CDK2	cyclin dependent kinase 2	-0.375827	6.94625	51.4775	6.72e-05	0.00107109
23293	ENSG00000070366	SMG6	SMG6 nonsense mediated mRNA decay factor	-0.375031	5.76235	51.4795	6.72e-05	0.00107109
4939	ENSG00000111335	OAS2	2'-5'-oligoadenylate synthetase 2	-0.625935	7.94803	51.4329	6.74e-05	0.00107359
28964	ENSG00000108262	GIT1	GIT ArfGAP 1	-0.439131	5.95626	51.41	6.75e-05	0.00107441
112858	ENSG00000172315	TP53RK	TP53 regulating kinase	0.541251	5.69465	51.3666	6.78e-05	0.00107587
26523	ENSG00000092847	AGO1	argonaute RISC component 1	-0.430655	5.08685	51.3682	6.77e-05	0.00107587
9138	ENSG00000076928	ARHGEF1	Rho guanine nucleotide exchange factor 1	-0.508799	5.68167	51.3469	6.78e-05	0.00107643
3140	ENSG00000153029	MR1	major histocompatibility complex, class I-related	-0.523669	5.42169	51.3255	6.8e-05	0.00107714
115	ENSG00000162104	ADCY9	adenylate cyclase 9	0.632855	6.71666	51.3113	6.8e-05	0.00107729
6811	ENSG00000162236	STX5	syntaxin 5	-0.413453	5.53224	51.1939	6.86e-05	0.0010853
85012	ENSG00000196507	TCEAL3	transcription elongation factor A like 3	-0.378873	6.23541	51.1849	6.87e-05	0.0010853
27292	ENSG00000086189	DIMT1	DIM1 rRNA methyltransferase and ribosome maturation factor	0.936365	4.74193	51.159	6.88e-05	0.00108638
7068	ENSG00000151090	THRB	thyroid hormone receptor beta	-0.692963	5.36323	50.9524	6.98e-05	0.00110189
3268	ENSG00000106351	AGFG2	ArfGAP with FG repeats 2	-0.658352	4.05468	50.928	6.99e-05	0.00110288
60436	ENSG00000118707	TGIF2	TGFB induced factor homeobox 2	0.406385	6.48333	50.9137	7e-05	0.00110305
1741	ENSG00000082458	DLG3	discs large MAGUK scaffold protein 3	-0.666217	5.33466	50.8512	7.03e-05	0.00110521
83549	ENSG00000130717	UCK1	uridine-cytidine kinase 1	-0.483772	5.49824	50.8505	7.03e-05	0.00110521
9498	ENSG00000050438	SLC4A8	solute carrier family 4 member 8	-0.638451	4.24084	50.8681	7.03e-05	0.00110521
1627	ENSG00000113758	DBN1	drebrin 1	-0.488821	7.04216	50.771	7.08e-05	0.0011097
27304	ENSG00000124217	MOCS3	molybdenum cofactor synthesis 3	0.479774	5.39282	50.7778	7.07e-05	0.0011097
57143	ENSG00000063761	ADCK1	aarF domain containing kinase 1	0.796655	3.87246	50.6635	7.13e-05	0.0011175
11218	ENSG00000064703	DDX20	DEAD-box helicase 20	0.696298	5.37223	50.6458	7.14e-05	0.00111796
90102	ENSG00000144824	PHLDB2	pleckstrin homology like domain family B member 2	0.504764	6.07424	50.6069	7.16e-05	0.00112017
131474	ENSG00000163528	CHCHD4	coiled-coil-helix-coiled-coil-helix domain containing 4	0.586258	5.29961	50.5585	7.19e-05	0.00112318
338596	ENSG00000148488	ST8SIA6	ST8 alpha-N-acetyl-neuraminide alpha-2,8-sialyltransferase 6	0.621524	6.90089	50.4931	7.22e-05	0.0011276
81848	ENSG00000187678	SPRY4	sprouty RTK signaling antagonist 4	2.08698	1.14073	50.4749	7.23e-05	0.00112812
219743	ENSG00000156521	TYSND1	trypsin like peroxisomal matrix peptidase 1	0.392379	5.74769	50.4261	7.26e-05	0.00113119
11099	ENSG00000070778	PTPN21	protein tyrosine phosphatase non-receptor type 21	0.780228	5.6032	50.3738	7.29e-05	0.00113456
100505806	ENSG00000250786	SNHG18	small nucleolar RNA host gene 18	-0.964487	1.98382	50.2309	7.36e-05	0.0011419
5590	ENSG00000067606	PRKCZ	protein kinase C zeta	-0.570876	4.7335	50.2468	7.35e-05	0.0011419
790	ENSG00000084774	CAD	carbamoyl-phosphate synthetase 2, aspartate transcarbamylase, and dihydroorotase	0.383514	7.19156	50.2616	7.35e-05	0.0011419
80183	ENSG00000102445	RUBCNL	rubicon like autophagy enhancer	3.26118	-1.35625	50.2272	7.37e-05	0.0011419
84787	ENSG00000133247	KMT5C	lysine methyltransferase 5C	-0.816454	4.71687	50.2619	7.35e-05	0.0011419
4343	ENSG00000155363	MOV10	Mov10 RISC complex RNA helicase	-0.3369	7.07144	50.1894	7.39e-05	0.0011431
440	ENSG00000070669	ASNS	asparagine synthetase (glutamine-hydrolyzing)	0.721268	6.27475	50.1934	7.38e-05	0.0011431
101930085	ENSG00000271122	HERPUD2-AS1	HERPUD2 antisense RNA 1	0.570432	3.67669	50.1707	7.4e-05	0.00114368
140460	ENSG00000183475	ASB7	ankyrin repeat and SOCS box containing 7	-0.436944	5.52087	50.1586	7.4e-05	0.00114371
55622	ENSG00000018699	TTC27	tetratricopeptide repeat domain 27	0.506595	4.71948	50.0581	7.46e-05	0.00115126
56892	ENSG00000176907	TCIM	transcriptional and immune response regulator	1.22925	1.47804	50.0077	7.49e-05	0.00115413
7414	ENSG00000035403	VCL	vinculin	0.524465	6.52246	50.0012	7.49e-05	0.00115413
100133941	ENSG00000272398	CD24	CD24 molecule	-0.446956	11.086	49.9566	7.51e-05	0.00115695
1026	ENSG00000124762	CDKN1A	cyclin dependent kinase inhibitor 1A	-0.452077	8.33425	49.9375	7.53e-05	0.00115759
3312	ENSG00000109971	HSPA8	heat shock protein family A (Hsp70) member 8	0.365073	10.5381	49.9231	7.53e-05	0.00115782
23542	ENSG00000008735	MAPK8IP2	mitogen-activated protein kinase 8 interacting protein 2	-0.724018	4.96453	49.8692	7.56e-05	0.00116059
9252	ENSG00000100784	RPS6KA5	ribosomal protein S6 kinase A5	-0.525159	4.67232	49.8677	7.56e-05	0.00116059
4953	ENSG00000115758	ODC1	ornithine decarboxylase 1	0.692763	6.30693	49.7986	7.6e-05	0.00116456
6196	ENSG00000071242	RPS6KA2	ribosomal protein S6 kinase A2	0.681716	4.65419	49.7989	7.6e-05	0.00116456
64651	ENSG00000144655	CSRNP1	cysteine and serine rich nuclear protein 1	-0.496088	4.63105	49.7069	7.66e-05	0.00117154
222584	ENSG00000168143	FAM83B	family with sequence similarity 83 member B	-0.768291	6.80096	50.263	7.67e-05	0.00117284
27031	ENSG00000113971	NPHP3	nephrocystin 3	-0.869669	3.3748	49.6287	7.7e-05	0.00117638
80110	ENSG00000142556	ZNF614	zinc finger protein 614	0.67295	3.98679	49.5716	7.73e-05	0.0011804
57506	ENSG00000088888	MAVS	mitochondrial antiviral signaling protein	-0.533701	7.9625	49.5151	7.77e-05	0.00118438
80315	ENSG00000113742	CPEB4	cytoplasmic polyadenylation element binding protein 4	0.528908	5.32627	49.4962	7.78e-05	0.00118504
10725	ENSG00000102908	NFAT5	nuclear factor of activated T cells 5	-0.505601	7.30614	49.4414	7.81e-05	0.00118802
25879	ENSG00000164934	DCAF13	DDB1 and CUL4 associated factor 13	0.654785	6.94361	49.4397	7.81e-05	0.00118802
23370	ENSG00000104880	ARHGEF18	Rho/Rac guanine nucleotide exchange factor 18	0.514511	5.14658	49.4248	7.82e-05	0.00118833
57106	ENSG00000090971	NAT14	N-acetyltransferase 14 (putative)	-0.558888	4.38546	49.412	7.83e-05	0.00118845
199953	ENSG00000188807	TMEM201	transmembrane protein 201	0.621318	4.21557	49.3899	7.84e-05	0.0011894
2963	ENSG00000188342	GTF2F2	general transcription factor IIF subunit 2	0.458033	5.56993	49.3312	7.87e-05	0.00119364
155370	ENSG00000291152	SBDSP1	SBDS pseudogene 1	0.447648	5.51487	49.3078	7.89e-05	0.0011937
4077	ENSG00000188554	NBR1	NBR1 autophagy cargo receptor	-0.356635	6.98474	49.3096	7.89e-05	0.0011937
55286	ENSG00000154274	C4orf19	chromosome 4 open reading frame 19	0.822289	5.47687	49.2219	7.94e-05	0.00120042
6812	ENSG00000136854	STXBP1	syntaxin binding protein 1	-0.567602	5.57344	49.1311	7.99e-05	0.00120763
84247	ENSG00000188636	RTL6	retrotransposon Gag like 6	0.55505	6.2816	49.1022	8.01e-05	0.00120923
79791	ENSG00000103264	FBXO31	F-box protein 31	0.384902	5.93282	49.0745	8.03e-05	0.00121073
10969	ENSG00000117395	EBNA1BP2	EBNA1 binding protein 2	0.509699	5.74697	49.0513	8.04e-05	0.00121182
9355	ENSG00000106689	LHX2	LIM homeobox 2	-1.05386	2.10335	49.0364	8.05e-05	0.00121215
55039	ENSG00000183665	TRMT12	tRNA methyltransferase 12 homolog	0.432204	6.27086	48.9732	8.09e-05	0.00121693
401265	ENSG00000124743	KLHL31	kelch like family member 31	1.36798	1.26038	48.9213	8.12e-05	0.00122068
84445	ENSG00000107816	LZTS2	leucine zipper tumor suppressor 2	-0.603527	5.79351	48.9013	8.13e-05	0.00122149
494143	ENSG00000143942	CHAC2	ChaC glutathione specific gamma-glutamylcyclotransferase 2	1.01165	3.60044	48.878	8.15e-05	0.0012226
57464	ENSG00000128578	STRIP2	striatin interacting protein 2	1.72206	0.114196	48.8558	8.16e-05	0.0012226
89890	ENSG00000165572	KBTBD6	kelch repeat and BTB domain containing 6	0.726715	5.49129	48.8624	8.16e-05	0.0012226
10153	ENSG00000115816	CEBPZ	CCAAT enhancer binding protein zeta	0.837042	6.57835	50.2989	8.21e-05	0.0012278
131408	ENSG00000175182	FAM131A	family with sequence similarity 131 member A	-0.6802	3.64187	48.7664	8.22e-05	0.0012278
9322	ENSG00000125733	TRIP10	thyroid hormone receptor interactor 10	-0.922359	4.38774	48.7688	8.22e-05	0.0012278
2171	ENSG00000164687	FABP5	fatty acid binding protein 5	1.14167	2.50696	48.7448	8.23e-05	0.00122878
57291	ENSG00000226950	DANCR	differentiation antagonizing non-protein coding RNA	0.782965	3.40622	48.6437	8.29e-05	0.00123722
81857	ENSG00000104973	MED25	mediator complex subunit 25	-0.527302	5.0501	48.5859	8.33e-05	0.00124163
341359	ENSG00000110975	SYT10	synaptotagmin 10	1.33507	2.27144	48.5353	8.36e-05	0.00124538
55311	ENSG00000167685	ZNF444	zinc finger protein 444	-0.437261	5.74459	48.4393	8.42e-05	0.00125289
84890	ENSG00000181915	ADO	2-aminoethanethiol dioxygenase	0.580925	5.72172	48.4344	8.43e-05	0.00125289
85416	ENSG00000139800	ZIC5	Zic family member 5	0.93714	2.08116	48.4143	8.44e-05	0.00125377
133308	ENSG00000164038	SLC9B2	solute carrier family 9 member B2	1.23497	2.8256	48.3695	8.47e-05	0.00125491
25963	ENSG00000103978	TMEM87A	transmembrane protein 87A	0.418381	6.49161	48.3765	8.47e-05	0.00125491
51603	ENSG00000010165	METTL13	methyltransferase 13, eEF1A N-terminus and K55	0.447705	6.77984	48.3737	8.47e-05	0.00125491
2729	ENSG00000001084	GCLC	glutamate-cysteine ligase catalytic subunit	0.469506	6.73053	48.2936	8.52e-05	0.00126116
57180	ENSG00000133627	ACTR3B	actin related protein 3B	0.51499	4.41381	48.2436	8.55e-05	0.00126495
63874	ENSG00000100439	ABHD4	abhydrolase domain containing 4, N-acyl phospholipase B	-0.4378	5.01	48.1755	8.6e-05	0.00126944
9767	ENSG00000102221	JADE3	jade family PHD finger 3	-0.525031	4.53387	48.1808	8.59e-05	0.00126944
127687	ENSG00000197982	C1orf122	chromosome 1 open reading frame 122	0.686422	4.78107	48.1319	8.63e-05	0.00127264
2645	ENSG00000106633	GCK	glucokinase	2.66185	-1.32179	48.1155	8.64e-05	0.00127318
144110	ENSG00000151117	TMEM86A	transmembrane protein 86A	-0.892355	2.9669	48.0297	8.69e-05	0.00127896
192670	ENSG00000134698	AGO4	argonaute RISC component 4	-1.15295	4.20177	48.9656	8.7e-05	0.00127896
8654	ENSG00000138735	PDE5A	phosphodiesterase 5A	-0.548944	3.96515	48.0446	8.68e-05	0.00127896
4691	ENSG00000115053	NCL	nucleolin	0.648977	9.99305	48.0103	8.71e-05	0.00127927
1509	ENSG00000117984	CTSD	cathepsin D	0.435072	9.98872	47.9407	8.75e-05	0.00128507
57121	ENSG00000184574	LPAR5	lysophosphatidic acid receptor 5	-1.27677	1.00223	47.9098	8.77e-05	0.00128707
4947	ENSG00000180304	OAZ2	ornithine decarboxylase antizyme 2	-0.398755	6.24587	47.8931	8.79e-05	0.00128766
55140	ENSG00000134014	ELP3	elongator acetyltransferase complex subunit 3	0.588788	5.04214	47.8027	8.85e-05	0.00129561
83666	ENSG00000138496	PARP9	poly(ADP-ribose) polymerase family member 9	-0.528668	8.28164	47.7723	8.87e-05	0.00129758
10623	ENSG00000186141	POLR3C	RNA polymerase III subunit C	0.422128	5.9149	47.7602	8.88e-05	0.00129772
25937	ENSG00000018408	WWTR1	WW domain containing transcription regulator 1	-0.60201	5.34017	47.7472	8.88e-05	0.00129795
60509	ENSG00000084693	AGBL5	AGBL carboxypeptidase 5	-0.441672	5.07553	47.7303	8.9e-05	0.00129858
26996	ENSG00000173890	GPR160	G protein-coupled receptor 160	-0.462378	6.07523	47.7052	8.91e-05	0.00130003
399473	ENSG00000188766	SPRED3	sprouty related EVH1 domain containing 3	-2.10063	1.60211	47.6944	8.92e-05	0.00130005
10276	ENSG00000173848	NET1	neuroepithelial cell transforming 1	-0.483433	7.20621	47.6548	8.95e-05	0.00130296
57609	ENSG00000066084	DIP2B	disco interacting protein 2 homolog B	-0.422083	7.47459	47.5832	9e-05	0.00130914
55288	ENSG00000126858	RHOT1	ras homolog family member T1	-0.427383	4.98644	47.4836	9.07e-05	0.00131821
51531	ENSG00000136932	TRMO	tRNA methyltransferase O	0.731634	4.07724	47.4357	9.1e-05	0.00132096
56006	ENSG00000105771	SMG9	SMG9 nonsense mediated mRNA decay factor	0.454112	4.84785	47.4415	9.1e-05	0.00132096
25841	ENSG00000166016	ABTB2	ankyrin repeat and BTB domain containing 2	0.484439	5.94567	47.3457	9.17e-05	0.00132916
402682	ENSG00000176125	UFSP1	UFM1 specific peptidase 1 (inactive)	0.801846	2.51748	47.3016	9.2e-05	0.00133264
2683	ENSG00000086062	B4GALT1	beta-1,4-galactosyltransferase 1	0.69644	7.96608	47.5721	9.22e-05	0.00133472
5194	ENSG00000162928	PEX13	peroxisomal biogenesis factor 13	-0.448605	6.22004	47.1616	9.3e-05	0.00134509
153443	ENSG00000151304	SRFBP1	serum response factor binding protein 1	0.916104	4.20512	47.1369	9.32e-05	0.00134658
123920	ENSG00000140931	CMTM3	CKLF like MARVEL transmembrane domain containing 3	-1.12705	2.05656	47.1019	9.34e-05	0.00134917
9873	ENSG00000137478	FCHSD2	FCH and double SH3 domains 2	-0.467064	4.90126	47.0762	9.36e-05	0.00135079
10020	ENSG00000159921	GNE	glucosamine (UDP-N-acetyl)-2-epimerase/N-acetylmannosamine kinase	-0.801142	3.13939	46.96	9.45e-05	0.00136138
65986	ENSG00000205189	ZBTB10	zinc finger and BTB domain containing 10	-0.510471	6.93961	46.9557	9.45e-05	0.00136138
51719	ENSG00000135932	CAB39	calcium binding protein 39	-0.355687	7.12548	46.9048	9.49e-05	0.00136546
618	ENSG00000236824	BCYRN1	brain cytoplasmic RNA 1	0.711294	5.18158	46.8969	9.49e-05	0.00136546
112869	ENSG00000176476	SGF29	SAGA complex associated factor 29	0.453139	4.80251	46.8296	9.54e-05	0.00137131
51292	ENSG00000100938	GMPR2	guanosine monophosphate reductase 2	-0.34253	6.6093	46.8218	9.55e-05	0.00137131
51292	ENSG00000284752	GMPR2	guanosine monophosphate reductase 2	-0.34253	6.6093	46.8218	9.55e-05	0.00137131
10432	ENSG00000239306	RBM14	RNA binding motif protein 14	0.47942	6.39319	46.7974	9.57e-05	0.00137247
140876	ENSG00000042062	RIPOR3	RIPOR family member 3	1.18955	4.91238	48.2153	9.58e-05	0.00137247
54534	ENSG00000136897	MRPL50	mitochondrial ribosomal protein L50	0.575478	5.35441	46.774	9.59e-05	0.00137247
54785	ENSG00000196544	BORCS6	BLOC-1 related complex subunit 6	-0.688785	4.00067	46.7699	9.59e-05	0.00137247
11078	ENSG00000100106	TRIOBP	TRIO and F-actin binding protein	-0.419794	5.47386	46.7343	9.62e-05	0.00137521
2020	ENSG00000164778	EN2	engrailed homeobox 2	1.01222	2.01661	46.724	9.62e-05	0.00137522
2114	ENSG00000157557	ETS2	ETS proto-oncogene 2, transcription factor	0.56085	5.21749	46.5054	9.79e-05	0.00139803
154743	ENSG00000164603	BMT2	base methyltransferase of 25S rRNA 2 homolog	-0.668197	3.9994	46.4777	9.81e-05	0.00139884
85464	ENSG00000141298	SSH2	slingshot protein phosphatase 2	-0.505705	4.60366	46.4859	9.81e-05	0.00139884
160428	ENSG00000136010	ALDH1L2	aldehyde dehydrogenase 1 family member L2	0.741362	3.19895	46.4264	9.85e-05	0.00140339
5165	ENSG00000067992	PDK3	pyruvate dehydrogenase kinase 3	-0.600355	4.94791	46.386	9.88e-05	0.00140676
168850	ENSG00000048405	ZNF800	zinc finger protein 800	0.409746	6.12733	46.3718	9.89e-05	0.00140722
5032	ENSG00000244165	P2RY11	purinergic receptor P2Y11	1.44318	1.46016	46.3485	9.91e-05	0.00140869
65095	ENSG00000129347	KRI1	KRI1 homolog	0.463927	5.17184	46.3261	9.93e-05	0.00141007
6723	ENSG00000116649	SRM	spermidine synthase	0.543976	6.24951	46.3046	9.95e-05	0.00141134
4248	ENSG00000128268	MGAT3	beta-1,4-mannosyl-glycoprotein 4-beta-N-acetylglucosaminyltransferase	1.38875	1.3009	46.2281	0.000100084	0.00141881
79137	ENSG00000144567	RETREG2	reticulophagy regulator family member 2	-0.323259	7.00297	46.188	0.000100404	0.0014222
57337	ENSG00000138468	SENP7	SUMO specific peptidase 7	-0.544607	5.0819	46.1383	0.000100802	0.0014267
7343	ENSG00000108312	UBTF	upstream binding transcription factor	0.429126	7.36077	46.0747	0.000101315	0.00143167
85455	ENSG00000140323	DISP2	dispatched RND transporter family member 2	-0.888436	2.15633	46.0818	0.000101257	0.00143167
156	ENSG00000173020	GRK2	G protein-coupled receptor kinase 2	-0.324602	7.28389	46.0643	0.000101399	0.00143171
54552	ENSG00000130119	GNL3L	G protein nucleolar 3 like	0.440085	5.89079	46.0345	0.00010164	0.00143397
26020	ENSG00000197324	LRP10	LDL receptor related protein 10	-0.344086	8.17744	45.9997	0.000101923	0.00143682
29923	ENSG00000135245	HILPDA	hypoxia inducible lipid droplet associated	-0.725754	6.90417	46.2762	0.000102272	0.00144006
9019	ENSG00000197965	MPZL1	myelin protein zero like 1	-0.381323	5.91263	45.9516	0.000102315	0.00144006
1051	ENSG00000172216	CEBPB	CCAAT enhancer binding protein beta	0.339966	6.58089	45.9228	0.000102551	0.00144223
55015	ENSG00000185246	PRPF39	pre-mRNA processing factor 39	0.527178	5.91384	45.8725	0.000102964	0.00144689
5635	ENSG00000161542	PRPSAP1	phosphoribosyl pyrophosphate synthetase associated protein 1	-0.426277	5.4757	45.8016	0.00010355	0.0014531
730101	ENSG00000291006	LOC730101	uncharacterized LOC730101	-0.92724	2.41907	45.7992	0.00010357	0.0014531
54482	ENSG00000122435	TRMT13	tRNA methyltransferase 13 homolog	0.636746	3.46894	45.6981	0.000104414	0.00146302
79805	ENSG00000143494	VASH2	vasohibin 2	-1.05516	1.70443	45.6947	0.000104442	0.00146302
220	ENSG00000184254	ALDH1A3	aldehyde dehydrogenase 1 family member A3	0.796433	2.69088	45.6216	0.000105057	0.00146961
25939	ENSG00000101347	SAMHD1	SAM and HD domain containing deoxynucleoside triphosphate triphosphohydrolase 1	-0.458273	6.98726	45.6191	0.000105079	0.00146961
57645	ENSG00000143157	POGK	pogo transposable element derived with KRAB domain	0.3834	7.18583	45.6018	0.000105225	0.0014705
2030	ENSG00000112759	SLC29A1	solute carrier family 29 member 1 (Augustine blood group)	0.45197	5.58468	45.4959	0.000106126	0.00148192
1230	ENSG00000163823	CCR1	C-C motif chemokine receptor 1	-0.856885	2.21394	45.4632	0.000106406	0.0014831
2651	ENSG00000111846	GCNT2	glucosaminyl (N-acetyl) transferase 2 (I blood group)	-1.11326	3.39464	45.447	0.000106546	0.0014831
2651	ENSG00000285222	GCNT2	glucosaminyl (N-acetyl) transferase 2 (I blood group)	-1.11326	3.39464	45.447	0.000106546	0.0014831
5610	ENSG00000055332	EIF2AK2	eukaryotic translation initiation factor 2 alpha kinase 2	-0.365367	8.15926	45.4529	0.000106495	0.0014831
8440	ENSG00000071051	NCK2	NCK adaptor protein 2	-0.422175	5.61362	45.476	0.000106297	0.0014831
55893	ENSG00000186918	ZNF395	zinc finger protein 395	-0.505013	5.30331	45.43	0.000106692	0.00148397
7627	ENSG00000162086	ZNF75A	zinc finger protein 75A	0.470332	5.28596	45.2927	0.000107882	0.00149934
23060	ENSG00000180357	ZNF609	zinc finger protein 609	-0.34944	7.06325	45.2325	0.00010841	0.00150549
2193	ENSG00000179115	FARSA	phenylalanyl-tRNA synthetase subunit alpha	0.374982	6.79147	45.1818	0.000108856	0.00150932
23541	ENSG00000100003	SEC14L2	SEC14 like lipid binding 2	1.63081	2.73905	45.7682	0.000108819	0.00150932
29088	ENSG00000137547	MRPL15	mitochondrial ribosomal protein L15	0.645336	5.85714	45.1687	0.000108972	0.00150974
10146	ENSG00000145907	G3BP1	G3BP stress granule assembly factor 1	0.526426	7.73933	45.0751	0.000109803	0.00152007
284069	ENSG00000161682	FAM171A2	family with sequence similarity 171 member A2	-0.496503	4.23674	45.0255	0.000110247	0.00152502
1999	ENSG00000163435	ELF3	E74 like ETS transcription factor 3	-0.642726	6.76808	44.9919	0.000110548	0.00152651
2618	ENSG00000159131	GART	phosphoribosylglycinamide formyltransferase, phosphoribosylglycinamide synthetase, phosphoribosylaminoimidazole synthetase	0.419323	6.62583	44.9941	0.000110528	0.00152651
2618	ENSG00000262473	GART	phosphoribosylglycinamide formyltransferase, phosphoribosylglycinamide synthetase, phosphoribosylaminoimidazole synthetase	0.419323	6.62583	44.9941	0.000110528	0.00152651
55450	ENSG00000162545	CAMK2N1	calcium/calmodulin dependent protein kinase II inhibitor 1	-0.714899	5.86434	44.9847	0.000110613	0.00152651
1943	ENSG00000099617	EFNA2	ephrin A2	-1.7605	-0.167519	44.9478	0.000110945	0.0015299
57570	ENSG00000126814	TRMT5	tRNA methyltransferase 5	0.460016	5.54853	44.9289	0.000111117	0.00153108
161394	ENSG00000100583	SAMD15	sterile alpha motif domain containing 15	0.680641	2.90741	44.8756	0.0001116	0.00153655
84675	ENSG00000147573	TRIM55	tripartite motif containing 55	1.16168	1.67939	44.8603	0.000111739	0.00153726
10076	ENSG00000060656	PTPRU	protein tyrosine phosphatase receptor type U	-0.548643	5.9086	44.8425	0.000111902	0.00153831
79953	ENSG00000101463	SYNDIG1	synapse differentiation inducing 1	1.08991	1.53163	44.7534	0.00011272	0.00154834
896	ENSG00000112576	CCND3	cyclin D3	-0.397634	6.0786	44.7281	0.000112953	0.00155035
22876	ENSG00000198825	INPP5F	inositol polyphosphate-5-phosphatase F	0.423754	5.04917	44.6577	0.000113605	0.00155503
23189	ENSG00000107104	KANK1	KN motif and ankyrin repeat domains 1	0.853858	4.42083	44.644	0.000113733	0.00155503
57674	ENSG00000173821	RNF213	ring finger protein 213	-0.474541	8.03278	44.6615	0.00011357	0.00155503
8531	ENSG00000060138	YBX3	Y-box binding protein 3	0.354862	6.48226	44.6529	0.000113651	0.00155503
91893	ENSG00000255561	FDXACB1	ferredoxin-fold anticodon binding domain containing 1	1.00023	2.2403	44.6806	0.000113393	0.00155503
60528	ENSG00000006744	ELAC2	elaC ribonuclease Z 2	0.368262	6.73048	44.6095	0.000114055	0.00155823
5747	ENSG00000169398	PTK2	protein tyrosine kinase 2	-0.369741	7.45311	44.5921	0.000114219	0.00155925
91966	ENSG00000197620	EOLA1	endothelium and lymphocyte associated ASCH domain 1	0.499547	4.67794	44.5805	0.000114327	0.00155953
3376	ENSG00000196305	IARS1	isoleucyl-tRNA synthetase 1	0.336164	8.24355	44.5299	0.000114802	0.00156481
3376	ENSG00000291356	IARS1	isoleucyl-tRNA synthetase 1	0.336164	8.24355	44.5299	0.000114802	0.00156481
266655	ENSG00000235106	BRD3OS	BRD3 opposite strand	-0.454739	4.34905	44.4887	0.000115191	0.0015689
3663	ENSG00000128604	IRF5	interferon regulatory factor 5	-0.771697	4.49706	44.4533	0.000115527	0.00157106
55005	ENSG00000155906	RMND1	required for meiotic nuclear division 1 homolog	-0.400252	6.15757	44.4559	0.000115503	0.00157106
196743	ENSG00000148832	PAOX	polyamine oxidase	-1.10817	1.95683	44.3695	0.000116327	0.00158073
92689	ENSG00000197712	FAM114A1	family with sequence similarity 114 member A1	-0.815761	4.30928	44.2022	0.000117943	0.00160146
55609	ENSG00000056277	ZNF280C	zinc finger protein 280C	0.684964	3.50823	44.1562	0.000118393	0.0016051
55701	ENSG00000165801	ARHGEF40	Rho guanine nucleotide exchange factor 40	-1.38228	2.9484	44.1587	0.000118368	0.0016051
22796	ENSG00000135775	COG2	component of oligomeric golgi complex 2	0.475874	6.02861	44.138	0.000118571	0.00160629
26035	ENSG00000138604	GLCE	glucuronic acid epimerase	-0.508056	4.91887	44.0815	0.000119126	0.00161258
389337	ENSG00000183111	ARHGEF37	Rho guanine nucleotide exchange factor 37	-0.85477	2.22624	44.0609	0.00011933	0.0016141
2099	ENSG00000091831	ESR1	estrogen receptor 1	-0.846166	7.86036	45.2981	0.000119997	0.00162064
81689	ENSG00000135070	ISCA1	iron-sulfur cluster assembly 1	0.435488	5.44661	43.9957	0.000119976	0.00162064
2521	ENSG00000089280	FUS	FUS RNA binding protein	0.43083	9.05452	43.9341	0.000120592	0.00162372
54858	ENSG00000130517	PGPEP1	pyroglutamyl-peptidase I	-1.14459	5.10031	45.2533	0.000120425	0.00162372
57338	ENSG00000154118	JPH3	junctophilin 3	-0.480944	4.45422	43.9383	0.00012055	0.00162372
79829	ENSG00000110583	NAA40	N-alpha-acetyltransferase 40, NatD catalytic subunit	-0.773031	5.72776	43.959	0.000120343	0.00162372
201931	ENSG00000170088	TMEM192	transmembrane protein 192	0.500168	5.86848	43.9201	0.000120732	0.00162438
26507	ENSG00000119946	CNNM1	cyclin and CBS domain divalent metal cation transport mediator 1	0.555347	4.2037	43.9074	0.000120859	0.00162485
23135	ENSG00000132510	KDM6B	lysine demethylase 6B	-0.461402	6.3695	43.7777	0.00012217	0.00164124
102606465	ENSG00000233184	DPH5-DT	DPH5 divergent transcript	1.08628	1.83066	43.7593	0.000122358	0.00164127
79990	ENSG00000068137	PLEKHH3	pleckstrin homology, MyTH4 and FERM domain containing H3	-0.399934	5.44728	43.7629	0.000122321	0.00164127
6929	ENSG00000071564	TCF3	transcription factor 3	-0.523806	6.94442	43.6866	0.000123103	0.00165001
166929	ENSG00000164023	SGMS2	sphingomyelin synthase 2	0.970574	3.01306	43.6481	0.000123499	0.00165406
100289678	ENSG00000204946	ZNF783	zinc finger protein 783	0.597598	5.41704	43.6	0.000123996	0.00165453
10687	ENSG00000240694	PNMA2	PNMA family member 2	-1.39079	1.91827	43.5598	0.000124413	0.00165453
23170	ENSG00000100304	TTLL12	tubulin tyrosine ligase like 12	0.46669	5.88682	43.5859	0.000124142	0.00165453
23276	ENSG00000114648	KLHL18	kelch like family member 18	0.474342	4.96245	43.5727	0.000124279	0.00165453
25946	ENSG00000161642	ZNF385A	zinc finger protein 385A	-0.453225	5.46824	43.5867	0.000124134	0.00165453
30850	ENSG00000109089	CDR2L	cerebellar degeneration related protein 2 like	-0.568835	4.68244	43.5546	0.000124468	0.00165453
4281	ENSG00000101871	MID1	midline 1	1.28234	0.872237	43.5683	0.000124325	0.00165453
6591	ENSG00000019549	SNAI2	snail family transcriptional repressor 2	1.55836	0.0722177	43.5552	0.000124461	0.00165453
7468	ENSG00000109685	NSD2	nuclear receptor binding SET domain protein 2	-0.328875	7.47919	43.5849	0.000124153	0.00165453
79918	ENSG00000103037	SETD6	SET domain containing 6, protein lysine methyltransferase	0.565566	3.75447	43.617	0.00012382	0.00165453
151887	ENSG00000091986	CCDC80	coiled-coil domain containing 80	1.06273	1.61502	43.4743	0.000125307	0.00166444
94134	ENSG00000165322	ARHGAP12	Rho GTPase activating protein 12	-0.436303	6.97868	43.4441	0.000125625	0.00166741
57575	ENSG00000138650	PCDH10	protocadherin 10	-0.782667	5.19296	43.4124	0.00012596	0.00167059
145741	ENSG00000198535	C2CD4A	C2 calcium dependent domain containing 4A	1.38204	1.23719	43.3911	0.000126185	0.00167233
54942	ENSG00000119328	ABITRAM	actin binding transcription modulator	0.41948	4.80521	43.3351	0.00012678	0.00167827
79183	ENSG00000124120	TTPAL	alpha tocopherol transfer protein like	0.36173	5.99321	43.331	0.000126823	0.00167827
2001	ENSG00000135374	ELF5	E74 like ETS transcription factor 5	-0.720564	2.97537	43.3142	0.000127003	0.0016794
57325	ENSG00000149474	KAT14	lysine acetyltransferase 14	0.536577	5.11032	43.2853	0.000127311	0.00168222
283932	ENSG00000260852	FBXL19-AS1	FBXL19 antisense RNA 1	0.475841	5.05432	43.2317	0.000127888	0.00168858
55160	ENSG00000074964	ARHGEF10L	Rho guanine nucleotide exchange factor 10 like	0.454047	5.34306	43.2169	0.000128046	0.00168879
56603	ENSG00000003137	CYP26B1	cytochrome P450 family 26 subfamily B member 1	2.07753	2.10273	44.4816	0.000128095	0.00168879
84626	ENSG00000133619	KRBA1	KRAB-A domain containing 1	-1.10217	3.61118	43.1604	0.000128658	0.00169495
10385	ENSG00000124508	BTN2A2	butyrophilin subfamily 2 member A2	-1.15709	3.42082	43.0986	0.000129331	0.00170255
9467	ENSG00000131370	SH3BP5	SH3 domain binding protein 5	0.88695	6.61622	44.3284	0.000129688	0.00170598
3757	ENSG00000055118	KCNH2	potassium voltage-gated channel subfamily H member 2	-1.37885	3.77073	44.2758	0.000130241	0.00171199
158135	ENSG00000175764	TTLL11	tubulin tyrosine ligase like 11	0.907313	2.72673	42.9317	0.000131169	0.00172291
8997	ENSG00000160145	KALRN	kalirin RhoGEF kinase	-0.674657	4.32763	42.9213	0.000131285	0.00172315
2035	ENSG00000159023	EPB41	erythrocyte membrane protein band 4.1	-0.529345	5.14892	42.9011	0.000131509	0.00172481
6773	ENSG00000170581	STAT2	signal transducer and activator of transcription 2	-0.9097	7.001	44.1324	0.000131763	0.00172687
284186	ENSG00000185332	TMEM105	TMEM105 long non-coding RNA	-0.787386	2.34749	42.8645	0.000131918	0.00172762
10081	ENSG00000090470	PDCD7	programmed cell death 7	0.354432	5.50693	42.753	0.000133172	0.00174276
28987	ENSG00000141101	NOB1	NIN1 (RPN12) binding protein 1 homolog	0.583625	6.93497	42.7337	0.000133392	0.00174305
642273	ENSG00000184731	FAM110C	family with sequence similarity 110 member C	-0.412318	5.45033	42.7344	0.000133384	0.00174305
152519	ENSG00000163293	NIPAL1	NIPA like domain containing 1	0.543043	3.81108	42.6939	0.000133844	0.00174591
22848	ENSG00000115977	AAK1	AP2 associated kinase 1	-0.624032	5.56819	42.6994	0.000133782	0.00174591
399687	ENSG00000196535	MYO18A	myosin XVIIIA	-0.549504	5.68963	42.6885	0.000133906	0.00174591
606293	ENSG00000290915	KLKP1	kallikrein pseudogene 1	1.25244	1.83069	42.6678	0.000134141	0.00174769
146395	ENSG00000169181	GSG1L	GSG1 like	1.39028	0.556975	42.6302	0.000134573	0.00175201
5045	ENSG00000140564	FURIN	furin, paired basic amino acid cleaving enzyme	-0.677684	6.4572	42.6168	0.000134726	0.00175272
9881	ENSG00000168016	TRANK1	tetratricopeptide repeat and ankyrin repeat containing 1	-0.743119	5.93372	42.5999	0.00013492	0.00175395
54529	ENSG00000138381	ASNSD1	asparagine synthetase domain containing 1	0.61036	6.14491	42.5645	0.000135328	0.00175798
51095	ENSG00000072756	TRNT1	tRNA nucleotidyl transferase 1	0.484614	6.16294	42.5277	0.000135753	0.00176091
79084	ENSG00000116455	WDR77	WD repeat domain 77	0.421966	5.70025	42.5358	0.00013566	0.00176091
26115	ENSG00000170921	TANC2	tetratricopeptide repeat, ankyrin repeat and coiled-coil containing 2	-0.47426	8.19608	42.5179	0.000135867	0.0017611
57624	ENSG00000144460	NYAP2	neuronal tyrosine-phosphorylated phosphoinositide-3-kinase adaptor 2	1.23914	0.813139	42.4448	0.000136719	0.00177085
80023	ENSG00000125841	NRSN2	neurensin 2	-0.366521	5.57684	42.434	0.000136846	0.00177119
9788	ENSG00000170873	MTSS1	MTSS I-BAR domain containing 1	-0.793364	3.96148	42.3819	0.000137457	0.0017778
345557	ENSG00000182836	PLCXD3	phosphatidylinositol specific phospholipase C X domain containing 3	1.02084	2.06393	42.3275	0.000138099	0.00178481
211	ENSG00000023330	ALAS1	5'-aminolevulinate synthase 1	-0.350659	5.73052	42.3007	0.000138417	0.00178719
730091	ENSG00000240875	LINC00886	long intergenic non-protein coding RNA 886	0.773773	3.7312	42.2949	0.000138486	0.00178719
114879	ENSG00000021762	OSBPL5	oxysterol binding protein like 5	-0.789152	3.66276	42.2661	0.000138828	0.001789
51560	ENSG00000154917	RAB6B	RAB6B, member RAS oncogene family	-0.88132	4.15615	42.2693	0.000138791	0.001789
100287896	ENSG00000254837	LIPT2-AS1	LIPT2 antisense RNA 1	1.06743	2.32603	42.247	0.000139056	0.00178934
5451	ENSG00000143190	POU2F1	POU class 2 homeobox 1	-0.460391	5.77698	42.2513	0.000139005	0.00178934
79000	ENSG00000127423	AUNIP	aurora kinase A and ninein interacting protein	0.594291	3.34752	42.1978	0.000139646	0.00179431
9912	ENSG00000006740	ARHGAP44	Rho GTPase activating protein 44	-0.482177	4.55846	42.2	0.000139619	0.00179431
79575	ENSG00000127220	ABHD8	abhydrolase domain containing 8	-1.00198	2.80546	42.0922	0.00014092	0.00180937
11091	ENSG00000196363	WDR5	WD repeat domain 5	0.382147	6.96952	42.0462	0.00014148	0.00181356
55777	ENSG00000204406	MBD5	methyl-CpG binding domain protein 5	-0.459753	4.88201	42.0437	0.00014151	0.00181356
84275	ENSG00000171612	SLC25A33	solute carrier family 25 member 33	0.596921	3.75935	42.0402	0.000141553	0.00181356
23767	ENSG00000125848	FLRT3	fibronectin leucine rich transmembrane protein 3	1.09198	3.58178	41.9768	0.00014233	0.00181625
3714	ENSG00000184916	JAG2	jagged canonical Notch ligand 2	-1.04363	5.04597	43.1832	0.000142416	0.00181625
388796	ENSG00000196756	SNHG17	small nucleolar RNA host gene 17	0.577009	4.06037	41.9644	0.000142481	0.00181625
389692	ENSG00000182759	MAFA	MAF bZIP transcription factor A	-0.991148	2.17292	41.9864	0.000142211	0.00181625
57707	ENSG00000140950	MEAK7	MTOR associated protein, eak-7 homolog	-0.615953	5.92698	42.0035	0.000142001	0.00181625
84542	ENSG00000162929	SANBR	SANT and BTB domain regulator of CSR	-0.650964	3.73413	41.9828	0.000142256	0.00181625
85365	ENSG00000119523	ALG2	ALG2 alpha-1,3/1,6-mannosyltransferase	0.397359	5.96159	41.9914	0.00014215	0.00181625
7772	ENSG00000278318	ZNF229	zinc finger protein 229	0.516251	4.57286	41.9437	0.000142736	0.00181819
2526	ENSG00000196371	FUT4	fucosyltransferase 4	0.705776	3.16087	41.883	0.000143488	0.00182646
84343	ENSG00000163755	HPS3	HPS3 biogenesis of lysosomal organelles complex 2 subunit 1	-0.661268	6.96286	41.8603	0.000143769	0.00182872
64781	ENSG00000100422	CERK	ceramide kinase	-0.785612	3.32948	41.8322	0.00014412	0.00183186
27297	ENSG00000241258	CRCP	CGRP receptor component	0.584921	6.28896	41.7435	0.000145232	0.00184468
6324	ENSG00000105711	SCN1B	sodium voltage-gated channel beta subunit 1	-0.528294	4.28875	41.7214	0.000145511	0.00184689
149466	ENSG00000253313	C1orf210	chromosome 1 open reading frame 210	-0.721402	3.26499	41.656	0.00014634	0.00184946
3716	ENSG00000162434	JAK1	Janus kinase 1	0.815676	8.77064	42.8979	0.000145825	0.00184946
54345	ENSG00000203883	SOX18	SRY-box transcription factor 18	-1.08572	1.2182	41.679	0.000146048	0.00184946
5566	ENSG00000072062	PRKACA	protein kinase cAMP-activated catalytic subunit alpha	-0.350274	6.88263	41.6633	0.000146247	0.00184946
5566	ENSG00000288516	PRKACA	protein kinase cAMP-activated catalytic subunit alpha	-0.350274	6.88263	41.6633	0.000146247	0.00184946
84961	ENSG00000108306	FBXL20	F-box and leucine rich repeat protein 20	-0.592405	4.33621	41.6608	0.000146279	0.00184946
90488	ENSG00000151135	TMEM263	transmembrane protein 263	-0.460622	5.42419	41.6863	0.000145955	0.00184946
7571	ENSG00000167377	ZNF23	zinc finger protein 23	0.540607	4.70482	41.6413	0.000146527	0.00185045
7690	ENSG00000172262	ZNF131	zinc finger protein 131	0.460358	6.61862	41.6334	0.000146627	0.00185045
284615	ENSG00000272031	ANKRD34A	ankyrin repeat domain 34A	-0.668786	3.98107	41.6072	0.000146962	0.00185336
2239	ENSG00000076716	GPC4	glypican 4	-0.407614	5.01432	41.5836	0.000147264	0.00185583
101927703	NA	FOXCUT	FOXC1 upstream transcript	2.50447	-1.05266	41.5534	0.000147651	0.00185906
85865	ENSG00000105793	GTPBP10	GTP binding protein 10	0.579375	5.07717	41.5473	0.00014773	0.00185906
55170	ENSG00000198890	PRMT6	protein arginine methyltransferase 6	0.43278	8.36805	41.5306	0.000147945	0.00186045
9968	ENSG00000184634	MED12	mediator complex subunit 12	-0.587639	5.31129	41.4645	0.0001488	0.00186987
80314	ENSG00000120616	EPC1	enhancer of polycomb homolog 1	0.804692	5.9116	42.559	0.000148955	0.00187049
3434	ENSG00000185745	IFIT1	interferon induced protein with tetratricopeptide repeats 1	-1.00528	8.61864	44.4534	0.000149445	0.00187532
4330	ENSG00000169184	MN1	MN1 proto-oncogene, transcriptional regulator	1.3794	0.140179	41.3812	0.000149886	0.00187952
8187	ENSG00000196793	ZNF239	zinc finger protein 239	0.880361	4.4026	41.3276	0.000150591	0.00188702
5481	ENSG00000171497	PPID	peptidylprolyl isomerase D	0.431114	5.32236	41.3192	0.000150702	0.00188708
6559	ENSG00000070915	SLC12A3	solute carrier family 12 member 3	2.5958	-0.982256	41.3058	0.000150879	0.00188795
112714	ENSG00000152086	TUBA3E	tubulin alpha 3e	2.77085	-0.161044	41.2859	0.000151141	0.00188991
112714	ENSG00000292120	TUBA3E	tubulin alpha 3e	2.77085	-0.161044	41.2859	0.000151141	0.00188991
9710	ENSG00000166398	GARRE1	granule associated Rac and RHOG effector 1	-0.710967	3.08063	41.198	0.00015231	0.00190318
9710	ENSG00000279389	GARRE1	granule associated Rac and RHOG effector 1	-0.710967	3.08063	41.198	0.00015231	0.00190318
9710	ENSG00000282735	GARRE1	granule associated Rac and RHOG effector 1	-0.710967	3.08063	41.198	0.00015231	0.00190318
83699	ENSG00000198478	SH3BGRL2	SH3 domain binding glutamate rich protein like 2	-0.41421	4.70031	41.1778	0.000152581	0.00190522
220441	ENSG00000176641	RNF152	ring finger protein 152	-0.83541	3.33822	41.1151	0.000153423	0.00191376
80745	ENSG00000138050	THUMPD2	THUMP domain containing 2	0.536256	3.98897	41.1107	0.000153481	0.00191376
440905	ENSG00000286058	FAR2P1	fatty acyl-CoA reductase 2 pseudogene 1	0.673207	3.24628	41.0231	0.000154669	0.00192722
10014	ENSG00000108840	HDAC5	histone deacetylase 5	-0.595432	4.27434	41.0092	0.000154859	0.00192822
9413	ENSG00000135063	ENTREP1	endosomal transmembrane epsin interactor 1	2.06213	-0.034804	40.9633	0.000155486	0.00193468
10133	ENSG00000123240	OPTN	optineurin	-0.32048	6.78019	40.9275	0.000155978	0.00193943
23623	ENSG00000160753	RUSC1	RUN and SH3 domain containing 1	-0.344992	6.59884	40.8777	0.000156664	0.00194616
839	ENSG00000138794	CASP6	caspase 6	-0.451679	4.7914	40.8723	0.000156739	0.00194616
9759	ENSG00000068024	HDAC4	histone deacetylase 4	0.702162	3.65513	40.8621	0.00015688	0.00194654
55607	ENSG00000158528	PPP1R9A	protein phosphatase 1 regulatory subunit 9A	-0.417185	4.86447	40.8526	0.000157012	0.00194682
126282	ENSG00000185361	TNFAIP8L1	TNF alpha induced protein 8 like 1	-0.818874	2.43729	40.8379	0.000157217	0.00194799
10209	ENSG00000173812	EIF1	eukaryotic translation initiation factor 1	0.442246	8.06233	40.8219	0.000157438	0.00194937
254065	ENSG00000165288	BRWD3	bromodomain and WD repeat domain containing 3	-1.29208	4.17678	41.9535	0.000157855	0.00195167
56946	ENSG00000158636	EMSY	EMSY transcriptional repressor, BRCA2 interacting	-0.464911	5.74578	40.7986	0.000157764	0.00195167
79697	ENSG00000170468	RIOX1	ribosomal oxygenase 1	0.618124	5.37828	40.7849	0.000157955	0.00195167
24145	ENSG00000110218	PANX1	pannexin 1	0.483497	5.11918	40.7658	0.000158223	0.00195359
5366	ENSG00000141682	PMAIP1	phorbol-12-myristate-13-acetate-induced protein 1	0.854088	3.02679	40.758	0.000158331	0.00195359
2530	ENSG00000033170	FUT8	fucosyltransferase 8	-0.38118	7.45053	40.7294	0.000158733	0.00195583
84668	ENSG00000122591	HYCC1	hyccin PI4KA lipid kinase complex subunit 1	1.00864	2.82757	40.7322	0.000158693	0.00195583
388695	ENSG00000163155	LYSMD1	LysM domain containing 1	-0.991839	3.14787	40.6814	0.00015941	0.00196079
5652	ENSG00000052344	PRSS8	serine protease 8	-0.760458	7.98693	41.8485	0.000159267	0.00196079
5753	ENSG00000101213	PTK6	protein tyrosine kinase 6	-0.568514	5.12085	40.6773	0.000159468	0.00196079
8626	ENSG00000073282	TP63	tumor protein p63	1.39308	0.975771	40.6369	0.000160041	0.00196647
9878	ENSG00000092203	TOX4	TOX high mobility group box family member 4	-0.354159	6.94702	40.6243	0.000160218	0.00196729
139231	ENSG00000123575	FAM199X	family with sequence similarity 199, X-linked	-0.38926	6.74383	40.6127	0.000160384	0.00196795
1605	ENSG00000173402	DAG1	dystroglycan 1	-0.382902	7.5964	40.5686	0.000161013	0.00197021
1801	ENSG00000108963	DPH1	diphthamide biosynthesis 1	0.507734	4.70063	40.5748	0.000160925	0.00197021
340533	ENSG00000050030	NEXMIF	neurite extension and migration factor	-1.44702	0.574555	40.5687	0.000161013	0.00197021
84893	ENSG00000134452	FBH1	F-box DNA helicase 1	-0.353449	7.06644	40.5812	0.000160834	0.00197021
27063	ENSG00000148677	ANKRD1	ankyrin repeat domain 1	2.69455	-0.198666	40.5405	0.000161416	0.00197378
3091	ENSG00000100644	HIF1A	hypoxia inducible factor 1 subunit alpha	0.44201	8.00879	40.5198	0.000161714	0.00197605
731220	ENSG00000196460	RFX8	regulatory factor X8	2.71716	-1.35621	40.5032	0.000161953	0.00197762
157247	NA	NA	NA	0.680088	3.62278	40.4896	0.000162149	0.00197864
30836	ENSG00000067334	DNTTIP2	deoxynucleotidyltransferase terminal interacting protein 2	0.64758	5.60319	40.4489	0.000162738	0.00198446
1003	ENSG00000179776	CDH5	cadherin 5	1.69335	-0.0738587	40.4336	0.000162959	0.00198579
115330	ENSG00000164849	GPR146	G protein-coupled receptor 146	-1.20351	0.715827	40.3857	0.000163657	0.00198609
1368	ENSG00000135678	CPM	carboxypeptidase M	0.846638	2.52116	40.4242	0.000163097	0.00198609
1829	ENSG00000046604	DSG2	desmoglein 2	-0.323099	6.80672	40.4016	0.000163426	0.00198609
2000	ENSG00000102034	ELF4	E74 like ETS transcription factor 4	-0.356048	5.45334	40.3926	0.000163556	0.00198609
64114	ENSG00000135926	TMBIM1	transmembrane BAX inhibitor motif containing 1	-1.1242	3.88826	41.1132	0.000163584	0.00198609
84678	ENSG00000089094	KDM2B	lysine demethylase 2B	-0.360669	5.78871	40.4148	0.000163234	0.00198609
255231	ENSG00000153898	MCOLN2	mucolipin TRP cation channel 2	0.704737	3.22401	40.3519	0.000164152	0.00199073
149076	ENSG00000160094	ZNF362	zinc finger protein 362	-0.416563	5.31233	40.3257	0.000164536	0.00199266
3728	ENSG00000173801	JUP	junction plakoglobin	-0.303899	8.47207	40.3273	0.000164513	0.00199266
8848	ENSG00000102804	TSC22D1	TSC22 domain family member 1	-0.367139	7.83912	40.3125	0.00016473	0.00199365
10678	ENSG00000170340	B3GNT2	UDP-GlcNAc:betaGal beta-1,3-N-acetylglucosaminyltransferase 2	-0.436968	5.75919	40.1746	0.000166775	0.00201702
10049	ENSG00000105993	DNAJB6	DnaJ heat shock protein family (Hsp40) member B6	0.352431	7.68157	40.1555	0.000167061	0.0020191
7301	ENSG00000092445	TYRO3	TYRO3 protein tyrosine kinase	-0.604385	3.89223	40.1308	0.000167431	0.00202219
9338	ENSG00000172465	TCEAL1	transcription elongation factor A like 1	-0.478071	5.81448	40.1204	0.000167588	0.00202271
84283	ENSG00000163472	TMEM79	transmembrane protein 79	-0.677037	4.50003	40.1023	0.000167859	0.0020246
23371	ENSG00000111077	TNS2	tensin 2	-0.881445	4.22022	40.0908	0.000168033	0.00202532
29941	ENSG00000160447	PKN3	protein kinase N3	-0.788162	3.25728	40.0767	0.000168246	0.00202651
4148	ENSG00000132031	MATN3	matrilin 3	0.561912	3.79462	40.0459	0.000168712	0.00202936
80207	ENSG00000125741	OPA3	outer mitochondrial membrane lipid metabolism regulator OPA3	0.386686	5.23562	40.0496	0.000168656	0.00202936
140711	ENSG00000101342	TLDC2	TBC/LysM-associated domain containing 2	-0.465442	5.15593	40.0155	0.000169174	0.00203135
23220	ENSG00000110042	DTX4	deltex E3 ubiquitin ligase 4	-1.4478	3.15393	41.1403	0.000169213	0.00203135
7536	ENSG00000168066	SF1	splicing factor 1	0.453212	7.95469	40.0123	0.000169222	0.00203135
10636	ENSG00000169220	RGS14	regulator of G protein signaling 14	-1.18635	1.31869	39.9871	0.000169607	0.00203335
5064	ENSG00000099864	PALM	paralemmin	-0.864314	5.15828	40.6977	0.000169618	0.00203335
100132815	NA	IPO5P1	importin 5 pseudogene 1	-0.890389	3.68831	39.9439	0.000170266	0.00203974
6809	ENSG00000166900	STX3	syntaxin 3	0.382207	6.27462	39.9338	0.000170421	0.00204022
54205	ENSG00000172115	CYCS	cytochrome c, somatic	0.499443	7.63834	39.8891	0.000171109	0.00204707
56944	ENSG00000116774	OLFML3	olfactomedin like 3	1.45008	4.64309	42.8435	0.000171497	0.00205032
43	ENSG00000087085	ACHE	acetylcholinesterase (Cartwright blood group)	-0.541013	4.10491	39.8528	0.00017167	0.00205101
284129	ENSG00000181045	SLC26A11	solute carrier family 26 member 11	-0.881202	4.53719	39.8374	0.000171909	0.00205248
4000	ENSG00000160789	LMNA	lamin A/C	-0.302588	8.29428	39.8269	0.000172072	0.00205303
5058	ENSG00000149269	PAK1	p21 (RAC1) activated kinase 1	-0.641261	3.93357	39.8195	0.000172188	0.00205303
54839	ENSG00000137821	LRRC49	leucine rich repeat containing 49	1.14356	0.863707	39.7977	0.000172526	0.00205568
64283	ENSG00000214944	ARHGEF28	Rho guanine nucleotide exchange factor 28	1.04895	3.70647	39.7681	0.000172989	0.00205981
84328	ENSG00000162441	LZIC	leucine zipper and CTNNBIP1 domain containing	0.45996	4.3128	39.6783	0.000174399	0.00207521
50485	ENSG00000138375	SMARCAL1	SWI/SNF related, matrix associated, actin dependent regulator of chromatin, subfamily a like 1	-0.405897	5.01777	39.6435	0.00017495	0.00207897
646762	NA	LOC646762	uncharacterized LOC646762	1.01544	4.28853	40.3504	0.000174874	0.00207897
100499227	NA	USP2-AS1	USP2 antisense RNA 1	2.26702	-0.738131	39.6274	0.000175205	0.00208061
10628	ENSG00000265972	TXNIP	thioredoxin interacting protein	-0.32488	8.19778	39.6057	0.000175551	0.00208331
55187	ENSG00000048707	VPS13D	vacuolar protein sorting 13 homolog D	-0.337775	6.62466	39.5806	0.000175951	0.00208666
9564	ENSG00000050820	BCAR1	BCAR1 scaffold protein, Cas family member	-0.588677	7.75958	39.5717	0.000176093	0.00208696
9849	ENSG00000177853	ZNF518A	zinc finger protein 518A	0.795414	6.06811	40.6001	0.000177321	0.0021001
55164	ENSG00000144736	SHQ1	SHQ1, H/ACA ribonucleoprotein assembly factor	0.532737	4.84125	39.4766	0.000177621	0.00210089
6426	ENSG00000136450	SRSF1	serine and arginine rich splicing factor 1	0.309739	9.02363	39.4763	0.000177625	0.00210089
11189	ENSG00000159409	CELF3	CUGBP Elav-like family member 3	-1.67614	1.80106	39.4358	0.000178281	0.00210723
8817	ENSG00000156427	FGF18	fibroblast growth factor 18	1.16413	1.56007	39.4282	0.000178405	0.0021073
196410	ENSG00000170439	TMT1B	thiol methyltransferase 1B	-0.72915	2.75266	39.4047	0.000178787	0.00210759
246175	ENSG00000138767	CNOT6L	CCR4-NOT transcription complex subunit 6 like	-0.514594	5.20959	39.4117	0.000178673	0.00210759
54898	ENSG00000197977	ELOVL2	ELOVL fatty acid elongase 2	1.53362	1.25858	39.4192	0.000178551	0.00210759
5754	ENSG00000112655	PTK7	protein tyrosine kinase 7 (inactive)	-0.739418	4.82138	39.3388	0.000179864	0.00211888
140838	ENSG00000170191	NANP	N-acetylneuraminic acid phosphatase	0.460715	4.86917	39.3115	0.000180312	0.00212275
4628	ENSG00000133026	MYH10	myosin heavy chain 10	-0.366093	6.92212	39.2942	0.000180598	0.00212328
9191	ENSG00000158796	DEDD	death effector domain containing	-0.388243	4.93065	39.2977	0.00018054	0.00212328
441459	ENSG00000230453	ANKRD18B	ankyrin repeat domain 18B	0.76226	3.78909	39.2589	0.00018118	0.00212871
10480	ENSG00000149100	EIF3M	eukaryotic translation initiation factor 3 subunit M	0.358992	6.67283	39.2187	0.000181847	0.00213513
23022	ENSG00000129116	PALLD	palladin, cytoskeletal associated protein	0.61248	5.66938	39.1574	0.00018287	0.00214572
9214	ENSG00000162894	FCMR	Fc mu receptor	2.27923	-0.247554	39.1426	0.000183118	0.00214721
146691	ENSG00000175662	TOM1L2	target of myb1 like 2 membrane trafficking protein	-0.351417	6.56101	39.1165	0.000183556	0.00215092
3437	ENSG00000119917	IFIT3	interferon induced protein with tetratricopeptide repeats 3	-0.978957	6.80396	41.2878	0.00018375	0.00215177
403	ENSG00000138175	ARL3	ADP ribosylation factor like GTPase 3	0.422215	4.84147	39.0518	0.000184649	0.00216086
124540	ENSG00000153944	MSI2	musashi RNA binding protein 2	0.312506	8.00883	38.9896	0.000185707	0.00217181
1015	ENSG00000079112	CDH17	cadherin 17	3.29445	-2.07022	38.9792	0.000185883	0.00217244
55667	ENSG00000137145	DENND4C	DENN domain containing 4C	-0.425268	5.94098	38.9698	0.000186045	0.0021729
22874	ENSG00000143850	PLEKHA6	pleckstrin homology domain containing A6	0.357947	7.06954	38.9414	0.000186532	0.00217714
25926	ENSG00000130935	NOL11	nucleolar protein 11	0.563042	7.53846	38.8686	0.000187786	0.00219034
27076	ENSG00000124466	LYPD3	LY6/PLAUR domain containing 3	-0.598079	6.28029	38.8478	0.000188146	0.00219309
80270	ENSG00000099377	HSD3B7	hydroxy-delta-5-steroid dehydrogenase, 3 beta- and steroid delta-isomerase 7	-0.366292	5.69808	38.8332	0.000188399	0.0021946
9955	ENSG00000153976	HS3ST3A1	heparan sulfate-glucosamine 3-sulfotransferase 3A1	1.80924	-0.827145	38.778	0.00018936	0.00220435
285368	ENSG00000163704	PRRT3	proline rich transmembrane protein 3	-0.403358	6.43582	38.7386	0.000190051	0.00221093
55065	ENSG00000132517	SLC52A1	solute carrier family 52 member 1	-1.09782	1.8151	38.7258	0.000190277	0.00221211
3127	ENSG00000198502	HLA-DRB5	major histocompatibility complex, class II, DR beta 5	0.581662	4.47733	38.6772	0.000191134	0.00222061
10499	ENSG00000140396	NCOA2	nuclear receptor coactivator 2	-0.5739	6.4727	38.6596	0.000191445	0.00222247
387496	ENSG00000122035	RASL11A	RAS like family 11 member A	1.47736	0.67053	38.6539	0.000191545	0.00222247
127707	ENSG00000179023	KLHDC7A	kelch domain containing 7A	-1.08787	1.18217	38.6419	0.000191759	0.0022235
5271	ENSG00000166401	SERPINB8	serpin family B member 8	1.31892	0.617569	38.5832	0.000192804	0.00223415
219623	ENSG00000196932	TMEM26	transmembrane protein 26	1.31036	0.665833	38.5356	0.000193657	0.00223818
4843	ENSG00000007171	NOS2	nitric oxide synthase 2	3.26261	-1.93726	38.5376	0.000193621	0.00223818
54502	ENSG00000163694	RBM47	RNA binding motif protein 47	-0.370051	7.28125	38.5379	0.000193616	0.00223818
653464	ENSG00000171943	SRGAP2C	SLIT-ROBO Rho GTPase activating protein 2C	-0.677605	4.06227	38.5523	0.000193357	0.00223818
8669	ENSG00000104131	EIF3J	eukaryotic translation initiation factor 3 subunit J	0.484039	7.09019	38.5004	0.00019429	0.00224403
255488	ENSG00000137393	RNF144B	ring finger protein 144B	-0.585722	4.49596	38.4711	0.00019482	0.00224868
8692	ENSG00000068001	HYAL2	hyaluronidase 2	0.368212	5.55057	38.4292	0.000195582	0.002256
4215	ENSG00000198909	MAP3K3	mitogen-activated protein kinase kinase kinase 3	-0.388223	6.0136	38.4029	0.00019606	0.00226005
10228	ENSG00000135823	STX6	syntaxin 6	-0.334241	7.32837	38.381	0.00019646	0.00226319
22841	ENSG00000107560	RAB11FIP2	RAB11 family interacting protein 2	0.707779	4.30682	38.3709	0.000196645	0.00226385
197196	ENSG00000179219	LINC00311	long intergenic non-protein coding RNA 311	2.52203	-1.61553	38.3522	0.000196987	0.00226484
26520	ENSG00000100575	TIMM9	translocase of inner mitochondrial membrane 9	0.498843	5.54557	38.3548	0.000196939	0.00226484
10241	ENSG00000136436	CALCOCO2	calcium binding and coiled-coil domain 2	-0.406365	6.70171	38.3266	0.000197458	0.00226878
286336	ENSG00000126882	FAM78A	family with sequence similarity 78 member A	-1.03851	2.18547	38.2826	0.00019827	0.00227368
4584	ENSG00000169894	MUC3A	mucin 3A, cell surface associated	-0.578124	3.63027	38.2891	0.000198151	0.00227368
653583	ENSG00000176531	PHLDB3	pleckstrin homology like domain family B member 3	-0.489195	3.94852	38.2849	0.000198228	0.00227368
100506281	ENSG00000240338	LOC100506281	uncharacterized LOC100506281	-1.6888	0.0914724	38.2349	0.000199155	0.00228235
100506281	ENSG00000285350	LOC100506281	uncharacterized LOC100506281	-1.6888	0.0914724	38.2349	0.000199155	0.00228235
100506281	ENSG00000290455	LOC100506281	uncharacterized LOC100506281	-1.6888	0.0914724	38.2349	0.000199155	0.00228235
7126	ENSG00000109079	TNFAIP1	TNF alpha induced protein 1	-0.474756	5.93283	38.2155	0.000199517	0.00228502
51780	ENSG00000120733	KDM3B	lysine demethylase 3B	-0.304699	7.10281	38.2062	0.00019969	0.00228552
91664	ENSG00000213799	ZNF845	zinc finger protein 845	0.555286	4.3821	38.1372	0.000200982	0.00229883
400508	NA	CRYM-AS1	CRYM antisense RNA 1	1.56069	0.787703	38.1219	0.00020127	0.00229968
83475	ENSG00000129932	DOHH	deoxyhypusine hydroxylase	0.550861	3.93955	38.1195	0.000201316	0.00229968
2077	ENSG00000105722	ERF	ETS2 repressor factor	-0.378562	6.26429	38.0654	0.000202339	0.00230987
6911	ENSG00000149922	TBX6	T-box transcription factor 6	-0.925994	2.47821	38.0306	0.000203001	0.00231592
7803	ENSG00000112245	PTP4A1	protein tyrosine phosphatase 4A1	0.386256	9.17976	38.0238	0.00020313	0.00231592
92312	ENSG00000254726	MEX3A	mex-3 RNA binding family member A	-0.838307	5.59223	39.0442	0.000203523	0.00231891
406	ENSG00000133794	BMAL1	basic helix-loop-helix ARNT like 1	-0.584323	3.40105	37.9762	0.000204041	0.00232253
55174	ENSG00000104613	INTS10	integrator complex subunit 10	0.452456	5.25364	37.9729	0.000204103	0.00232253
79640	ENSG00000184208	C22orf46P	CTA-216E10.6	-0.442707	4.80945	37.924	0.000205043	0.00233172
252839	ENSG00000116857	TMEM9	transmembrane protein 9	-0.413529	6.6354	37.899	0.000205525	0.00233571
6935	ENSG00000148516	ZEB1	zinc finger E-box binding homeobox 1	1.18864	0.288632	37.8903	0.000205694	0.00233613
84294	ENSG00000147679	UTP23	UTP23 small subunit processome component	0.579072	5.47505	37.8583	0.000206315	0.00234167
4209	ENSG00000116604	MEF2D	myocyte enhancer factor 2D	-0.457001	5.7053	37.8447	0.00020658	0.00234225
4209	ENSG00000291761	MEF2D	myocyte enhancer factor 2D	-0.457001	5.7053	37.8447	0.00020658	0.00234225
84936	ENSG00000166140	ZFYVE19	zinc finger FYVE-type containing 19	-0.414901	5.01668	37.8421	0.00020663	0.00234225
51118	ENSG00000183520	UTP11	UTP11 small subunit processome component	0.44071	4.80132	37.7816	0.000207811	0.00235413
390205	ENSG00000204950	LRRC10B	leucine rich repeat containing 10B	-0.815444	2.772	37.7182	0.00020906	0.00236677
23348	ENSG00000088387	DOCK9	dedicator of cytokinesis 9	-0.417353	5.01241	37.683	0.000209756	0.00237312
80772	ENSG00000224051	CPTP	ceramide-1-phosphate transfer protein	-0.448996	4.1483	37.6704	0.000210007	0.00237445
57410	ENSG00000142186	SCYL1	SCY1 like pseudokinase 1	-0.318911	6.65719	37.661	0.000210194	0.00237504
50617	ENSG00000105929	ATP6V0A4	ATPase H+ transporting V0 subunit a4	-0.52625	4.06194	37.6463	0.000210486	0.00237682
57091	ENSG00000087589	CASS4	Cas scaffold protein family member 4	1.3727	0.676111	37.6325	0.000210761	0.0023769
9057	ENSG00000103064	SLC7A6	solute carrier family 7 member 6	0.470788	6.21473	37.636	0.000210692	0.0023769
162989	ENSG00000160570	DEDD2	death effector domain containing 2	-0.500372	3.95706	37.5982	0.000211446	0.00238311
6666	ENSG00000177732	SOX12	SRY-box transcription factor 12	-0.351431	6.85731	37.5912	0.000211587	0.00238318
10301	ENSG00000176124	DLEU1	deleted in lymphocytic leukemia 1	0.662937	3.01117	37.537	0.000212677	0.00239242
1767	ENSG00000039139	DNAH5	dynein axonemal heavy chain 5	0.948776	2.16035	37.5375	0.000212667	0.00239242
85476	ENSG00000168827	GFM1	G elongation factor mitochondrial 1	0.384953	6.73816	37.5302	0.000212813	0.00239242
10749	ENSG00000129250	KIF1C	kinesin family member 1C	-0.303051	7.76077	37.5226	0.000212968	0.00239265
79583	ENSG00000205084	TMEM231	transmembrane protein 231	0.433381	4.48101	37.5061	0.000213302	0.00239488
9630	ENSG00000156049	GNA14	G protein subunit alpha 14	0.731956	3.27921	37.4812	0.000213807	0.00239903
2057	ENSG00000187266	EPOR	erythropoietin receptor	-0.770004	4.37388	37.4696	0.000214041	0.00240013
118460	ENSG00000223496	EXOSC6	exosome component 6	0.613007	6.13409	37.4377	0.000214691	0.0024059
221184	ENSG00000140848	CPNE2	copine 2	-0.585875	3.48326	37.4255	0.00021494	0.00240717
10079	ENSG00000054793	ATP9A	ATPase phospholipid transporting 9A (putative)	-0.437178	9.17353	37.3799	0.000215875	0.00241611
55349	ENSG00000016391	CHDH	choline dehydrogenase	0.429739	5.05048	37.3529	0.000216431	0.0024208
124359	ENSG00000166446	CDYL2	chromodomain Y like 2	-0.384226	7.34183	37.2997	0.00021753	0.00243067
54621	ENSG00000176834	VSIG10	V-set and immunoglobulin domain containing 10	-0.46768	5.71591	37.297	0.000217588	0.00243067
114880	ENSG00000079156	OSBPL6	oxysterol binding protein like 6	-0.550425	4.17733	37.2167	0.00021926	0.00244342
6097	ENSG00000143365	RORC	RAR related orphan receptor C	-0.884791	3.13509	37.2157	0.000219281	0.00244342
7586	ENSG00000106261	ZKSCAN1	zinc finger with KRAB and SCAN domains 1	-0.374321	7.88342	37.2325	0.00021893	0.00244342
9836	ENSG00000168806	LCMT2	leucine carboxyl methyltransferase 2	0.587625	4.75687	37.219	0.000219212	0.00244342
25837	ENSG00000167964	RAB26	RAB26, member RAS oncogene family	-0.955301	4.54199	38.0011	0.000219956	0.0024494
26504	ENSG00000158158	CNNM4	cyclin and CBS domain divalent metal cation transport mediator 4	-0.35888	6.91238	37.1746	0.000220145	0.00244996
339175	ENSG00000087995	METTL2A	methyltransferase 2A, tRNA N3-cytidine	0.360591	6.22194	37.1546	0.000220566	0.00245311
54662	ENSG00000107021	TBC1D13	TBC1 domain family member 13	-0.385785	5.38331	37.1229	0.000221236	0.00245902
57476	ENSG00000023171	GRAMD1B	GRAM domain containing 1B	1.50185	0.704801	37.1147	0.000221411	0.00245941
11041	ENSG00000174684	B4GAT1	beta-1,4-glucuronyltransferase 1	-0.70475	4.31357	37.1004	0.000221714	0.00245969
5333	ENSG00000187091	PLCD1	phospholipase C delta 1	-1.0358	1.87794	37.1034	0.00022165	0.00245969
23378	ENSG00000132275	RRP8	ribosomal RNA processing 8	0.648501	3.64176	37.0484	0.000222821	0.00246888
6764	ENSG00000166444	DENND2B	DENN domain containing 2B	-0.760247	2.31935	37.051	0.000222767	0.00246888
6621	ENSG00000165684	SNAPC4	small nuclear RNA activating complex polypeptide 4	0.624514	5.40973	37.0377	0.000223051	0.00246989
90355	ENSG00000181751	MACIR	macrophage immunometabolism regulator	0.584082	5.5274	37.0198	0.000223434	0.00247257
2069	ENSG00000124882	EREG	epiregulin	2.48543	-0.889095	36.998	0.000223902	0.00247621
158	ENSG00000239900	ADSL	adenylosuccinate lyase	0.452906	5.4244	36.95	0.000224937	0.00248231
162427	ENSG00000141699	RETREG3	reticulophagy regulator family member 3	-0.390877	5.22553	36.9531	0.00022487	0.00248231
27130	ENSG00000119509	INVS	inversin	-0.519745	4.15156	36.956	0.000224807	0.00248231
85002	ENSG00000186523	FAM86B1	family with sequence similarity 86 member B1	1.20673	1.64361	36.9464	0.000225015	0.00248231
10555	ENSG00000169692	AGPAT2	1-acylglycerol-3-phosphate O-acyltransferase 2	-0.418598	5.92973	36.8955	0.000226117	0.00249137
246330	ENSG00000174516	PELI3	pellino E3 ubiquitin protein ligase family member 3	-0.684795	3.29862	36.901	0.000225998	0.00249137
131578	ENSG00000172061	LRRC15	leucine rich repeat containing 15	2.3356	-0.566699	36.8454	0.000227213	0.00249811
163154	ENSG00000212123	PRR22	proline rich 22	1.71711	1.24572	36.8441	0.00022724	0.00249811
3156	ENSG00000113161	HMGCR	3-hydroxy-3-methylglutaryl-CoA reductase	0.450657	7.25403	36.8417	0.000227294	0.00249811
64784	ENSG00000140577	CRTC3	CREB regulated transcription coactivator 3	-0.395752	5.02786	36.8602	0.000226888	0.00249811
1848	ENSG00000139318	DUSP6	dual specificity phosphatase 6	1.0363	1.61052	36.8244	0.000227673	0.00249838
4477	ENSG00000263639	MSMB	microseminoprotein beta	0.997822	1.33592	36.8213	0.000227741	0.00249838
818	ENSG00000148660	CAMK2G	calcium/calmodulin dependent protein kinase II gamma	-0.378177	5.63806	36.8222	0.00022772	0.00249838
10921	ENSG00000205937	RNPS1	RNA binding protein with serine rich domain 1	0.290182	7.86731	36.8102	0.000227983	0.00249949
118	ENSG00000087274	ADD1	adducin 1	-0.306503	7.32024	36.7666	0.000228945	0.00250847
158314	NA	LINC00475	long intergenic non-protein coding RNA 475	1.68298	-0.87142	36.7598	0.000229096	0.00250858
55605	ENSG00000139116	KIF21A	kinesin family member 21A	0.731194	6.01645	37.2959	0.000231012	0.00252776
90678	ENSG00000148356	LRSAM1	leucine rich repeat and sterile alpha motif containing 1	-0.494718	5.99377	36.6681	0.000231133	0.00252776
79586	ENSG00000123989	CHPF	chondroitin polymerizing factor	0.316984	8.19906	36.6422	0.000231714	0.00253255
7163	ENSG00000076554	TPD52	tumor protein D52	-0.367011	7.79449	36.6168	0.000232284	0.00253408
7675	ENSG00000197961	ZNF121	zinc finger protein 121	0.736398	3.36791	36.6265	0.000232065	0.00253408
8777	ENSG00000107186	MPDZ	multiple PDZ domain crumbs cell polarity complex component	-0.420124	4.74802	36.6222	0.000232163	0.00253408
23151	ENSG00000075240	GRAMD4	GRAM domain containing 4	-0.524566	5.94052	36.582	0.000233068	0.00253951
79932	ENSG00000142687	KIAA0319L	KIAA0319 like	-0.320309	5.99574	36.5873	0.000232948	0.00253951
80164	ENSG00000183248	PRR36	proline rich 36	-0.70427	4.8753	36.5739	0.000233252	0.00253995
124751	ENSG00000184619	KRBA2	KRAB-A domain containing 2	-0.726947	2.40445	36.5182	0.000234515	0.0025451
124997	ENSG00000167716	WDR81	WD repeat domain 81	0.650693	2.82035	36.515	0.000234587	0.0025451
124997	ENSG00000276021	WDR81	WD repeat domain 81	0.650693	2.82035	36.515	0.000234587	0.0025451
219833	ENSG00000174370	KCNJ5-AS1	KCNJ5 antisense RNA 1	-1.07733	1.02845	36.5188	0.000234502	0.0025451
55102	ENSG00000066739	ATG2B	autophagy related 2B	-0.359621	6.22788	36.5394	0.000234034	0.0025451
57524	ENSG00000167971	CASKIN1	CASK interacting protein 1	-1.57736	3.01021	37.4963	0.000234525	0.0025451
79570	ENSG00000084628	NKAIN1	sodium/potassium transporting ATPase interacting 1	1.63522	0.809613	36.5247	0.000234368	0.0025451
116064	ENSG00000163428	LRRC58	leucine rich repeat containing 58	0.533932	7.8763	36.5	0.000234929	0.00254725
25940	ENSG00000119812	FAM98A	family with sequence similarity 98 member A	0.431101	6.52657	36.464	0.000235753	0.00255358
9294	ENSG00000267534	S1PR2	sphingosine-1-phosphate receptor 2	-1.45275	2.15586	36.4619	0.000235801	0.00255358
5872	ENSG00000143545	RAB13	RAB13, member RAS oncogene family	-0.340133	6.53787	36.4366	0.000236381	0.00255829
81562	ENSG00000114988	LMAN2L	lectin, mannose binding 2 like	-0.485048	4.68823	36.4177	0.000236817	0.00256055
8869	ENSG00000115525	ST3GAL5	ST3 beta-galactoside alpha-2,3-sialyltransferase 5	-0.4779	4.06626	36.415	0.000236879	0.00256055
11190	ENSG00000126001	CEP250	centrosomal protein 250	-0.452133	5.82859	36.3868	0.000237529	0.00256601
10613	ENSG00000107566	ERLIN1	ER lipid raft associated 1	0.465151	5.7283	36.3521	0.000238334	0.00257
222950	ENSG00000166924	NYAP1	neuronal tyrosine phosphorylated phosphoinositide-3-kinase adaptor 1	-2.73537	-0.470188	36.3579	0.0002382	0.00257
5101	ENSG00000184226	PCDH9	protocadherin 9	1.03508	1.71425	36.3619	0.000238107	0.00257
148189	ENSG00000261824	LINC00662	long intergenic non-protein coding RNA 662	0.764953	2.00574	36.298	0.000239594	0.00257575
23507	ENSG00000197147	LRRC8B	leucine rich repeat containing 8 VRAC subunit B	0.554573	5.27503	36.3025	0.000239488	0.00257575
27043	ENSG00000141456	PELP1	proline, glutamate and leucine rich protein 1	0.308027	6.39457	36.3016	0.00023951	0.00257575
4615	ENSG00000172936	MYD88	MYD88 innate immune signal transduction adaptor	-0.410346	6.64187	36.3225	0.000239022	0.00257575
5359	ENSG00000188313	PLSCR1	phospholipid scramblase 1	-0.434081	7.40689	36.3039	0.000239455	0.00257575
374655	ENSG00000140548	ZNF710	zinc finger protein 710	-0.432971	5.81315	36.2907	0.000239764	0.00257601
154043	ENSG00000153721	CNKSR3	CNKSR family member 3	0.632618	3.16273	36.2485	0.000240753	0.00258019
26009	ENSG00000036549	ZZZ3	zinc finger ZZ-type containing 3	0.490162	6.32317	36.2636	0.000240398	0.00258019
376267	ENSG00000139998	RAB15	RAB15, member RAS oncogene family	-0.405754	6.97646	36.2431	0.000240882	0.00258019
54566	ENSG00000095203	EPB41L4B	erythrocyte membrane protein band 4.1 like 4B	-0.554326	5.44288	36.2543	0.000240618	0.00258019
84612	ENSG00000124171	PARD6B	par-6 family cell polarity regulator beta	0.304137	8.04466	36.2509	0.000240697	0.00258019
10633	ENSG00000100276	RASL10A	RAS like family 10 member A	1.69299	-0.191823	36.1837	0.000242282	0.00259362
139065	ENSG00000179542	SLITRK4	SLIT and NTRK like family member 4	1.25615	1.39747	36.1566	0.000242927	0.00259867
57700	ENSG00000151553	FHIP2A	FHF complex subunit HOOK interacting protein 2A	-0.319366	5.84854	36.1515	0.000243047	0.00259867
4355	ENSG00000108852	MPP2	MAGUK p55 scaffold protein 2	-0.96885	3.086	36.136	0.000243417	0.00260105
125170	ENSG00000177427	MIEF2	mitochondrial elongation factor 2	-0.536661	3.90248	36.1255	0.000243667	0.00260215
125170	ENSG00000284495	MIEF2	mitochondrial elongation factor 2	-0.536661	3.90248	36.1255	0.000243667	0.00260215
1917	ENSG00000101210	EEF1A2	eukaryotic translation elongation factor 1 alpha 2	-0.351089	9.446	36.1179	0.000243849	0.00260222
8428	ENSG00000102572	STK24	serine/threonine kinase 24	0.328719	6.53121	36.1129	0.000243968	0.00260222
85027	ENSG00000256235	SMIM3	small integral membrane protein 3	-1.10941	1.89602	36.0884	0.000244554	0.00260691
56916	ENSG00000163104	SMARCAD1	SWI/SNF-related, matrix-associated actin-dependent regulator of chromatin, subfamily a, containing DEAD/H box 1	0.469411	5.99748	36.0646	0.000245126	0.00261144
6601	ENSG00000139613	SMARCC2	SWI/SNF related, matrix associated, actin dependent regulator of chromatin subfamily c member 2	-0.471648	7.42351	36.025	0.000246081	0.00262003
22934	ENSG00000153574	RPIA	ribose 5-phosphate isomerase A	0.532814	5.11901	35.9747	0.000247299	0.00262996
639	ENSG00000057657	PRDM1	PR/SET domain 1	2.2985	-0.807124	35.962	0.000247608	0.00262996
7158	ENSG00000067369	TP53BP1	tumor protein p53 binding protein 1	-0.461417	6.53841	35.9663	0.000247503	0.00262996
729993	ENSG00000237515	SHISA9	shisa family member 9	-0.416154	4.9329	35.9737	0.000247322	0.00262996
467	ENSG00000162772	ATF3	activating transcription factor 3	0.775862	3.48936	35.9257	0.000248493	0.00263778
6461	ENSG00000107338	SHB	SH2 domain containing adaptor protein B	0.407503	5.32223	35.9011	0.000249095	0.00264259
7091	ENSG00000106829	TLE4	TLE family member 4, transcriptional corepressor	1.67663	0.504893	35.8767	0.000249693	0.00264734
57221	ENSG00000112379	ARFGEF3	ARFGEF family member 3	-0.354242	7.43962	35.8414	0.000250564	0.00265499
57546	ENSG00000172840	PDP2	pyruvate dehydrogenase phosphatase catalytic subunit 2	0.462625	4.49287	35.8288	0.000250875	0.0026567
148254	ENSG00000186300	ZNF555	zinc finger protein 555	-0.835064	2.25719	35.8165	0.000251179	0.00265833
55640	ENSG00000119686	FLVCR2	FLVCR choline and putative heme transporter 2	0.556043	5.18467	35.8101	0.000251338	0.00265842
9654	ENSG00000135912	TTLL4	tubulin tyrosine ligase like 4	0.403629	4.98716	35.7982	0.000251633	0.00265995
7482	ENSG00000134245	WNT2B	Wnt family member 2B	-1.19166	1.89097	35.7786	0.00025212	0.00266351
148327	ENSG00000143578	CREB3L4	cAMP responsive element binding protein 3 like 4	-0.346158	6.13471	35.7434	0.000252999	0.00266913
2395	ENSG00000165060	FXN	frataxin	0.794775	3.00507	35.7441	0.000252981	0.00266913
57470	ENSG00000130764	LRRC47	leucine rich repeat containing 47	0.344514	5.69793	35.7392	0.000253105	0.00266913
27290	ENSG00000122711	SPINK4	serine peptidase inhibitor Kazal type 4	1.3894	-0.2156	35.6974	0.000254153	0.0026754
4915	ENSG00000148053	NTRK2	neurotrophic receptor tyrosine kinase 2	3.82027	-0.669157	35.7081	0.000253882	0.0026754
493	ENSG00000058668	ATP2B4	ATPase plasma membrane Ca2+ transporting 4	-0.696745	4.87889	35.703	0.000254011	0.0026754
23549	ENSG00000123992	DNPEP	aspartyl aminopeptidase	0.356592	7.28149	35.6789	0.000254617	0.0026782
55032	ENSG00000138459	SLC35A5	solute carrier family 35 member A5	0.63436	5.17035	35.6748	0.000254721	0.0026782
23237	ENSG00000198576	ARC	activity regulated cytoskeleton associated protein	1.05773	1.40038	35.5806	0.000257109	0.0027017
116138	ENSG00000124702	KLHDC3	kelch domain containing 3	-0.336776	7.13002	35.5596	0.000257644	0.00270572
100134713	ENSG00000240889	NDUFB2-AS1	NDUFB2 antisense RNA 1	0.901369	1.94617	35.5347	0.000258282	0.00271081
23531	ENSG00000108960	MMD	monocyte to macrophage differentiation associated	-0.688496	3.88494	35.5174	0.000258725	0.0027112
30846	ENSG00000024422	EHD2	EH domain containing 2	-1.00818	3.43659	35.5157	0.00025877	0.0027112
3337	ENSG00000132002	DNAJB1	DnaJ heat shock protein family (Hsp40) member B1	-0.287541	7.20075	35.5154	0.000258778	0.0027112
23125	ENSG00000108509	CAMTA2	calmodulin binding transcription activator 2	-0.535494	5.88411	35.4578	0.000260263	0.00272515
79595	ENSG00000136715	SAP130	Sin3A associated protein 130	-0.343022	5.87295	35.4494	0.000260479	0.0027258
160518	ENSG00000170456	DENND5B	DENN domain containing 5B	0.673892	3.73685	35.4015	0.000261726	0.00273238
51490	ENSG00000198917	SPOUT1	SPOUT domain containing methyltransferase 1	0.377515	6.04158	35.4101	0.0002615	0.00273238
80055	ENSG00000197121	PGAP1	post-GPI attachment to proteins inositol deacylase 1	-0.466842	4.44769	35.4131	0.000261423	0.00273238
83999	ENSG00000183762	KREMEN1	kringle containing transmembrane protein 1	-0.809974	4.31986	35.4068	0.000261588	0.00273238
10927	ENSG00000106723	SPIN1	spindlin 1	0.395502	7.84785	35.3346	0.000263475	0.00274215
2731	ENSG00000178445	GLDC	glycine decarboxylase	1.29501	1.48819	35.3243	0.000263746	0.00274215
283951	ENSG00000174109	UQCC4	ubiquinol-cytochrome c reductase complex assembly factor 4	0.459819	4.086	35.3293	0.000263614	0.00274215
342979	ENSG00000187867	PALM3	paralemmin 3	-0.692441	3.98126	35.3453	0.000263195	0.00274215
342979	ENSG00000288318	PALM3	paralemmin 3	-0.692441	3.98126	35.3453	0.000263195	0.00274215
3843	ENSG00000065150	IPO5	importin 5	0.357227	6.71054	35.342	0.000263283	0.00274215
64748	ENSG00000105520	PLPPR2	phospholipid phosphatase related 2	-0.346938	6.20041	35.3591	0.000262834	0.00274215
81570	ENSG00000162129	CLPB	ClpB family mitochondrial disaggregase	0.42605	4.81221	35.3518	0.000263024	0.00274215
80155	ENSG00000164134	NAA15	N-alpha-acetyltransferase 15, NatA auxiliary subunit	0.537487	6.94783	35.2902	0.000264645	0.00274989
9662	ENSG00000174799	CEP135	centrosomal protein 135	0.886326	4.2476	35.2779	0.00026497	0.00275165
207	ENSG00000142208	AKT1	AKT serine/threonine kinase 1	-0.284001	9.05253	35.2495	0.000265724	0.00275786
5909	ENSG00000076864	RAP1GAP	RAP1 GTPase activating protein	-0.496744	4.88831	35.2302	0.000266238	0.00276011
79935	ENSG00000105219	CCNP	cyclin P	1.21882	1.93958	35.2296	0.000266253	0.00276011
51601	ENSG00000144182	LIPT1	lipoyltransferase 1	0.677447	2.69554	35.2114	0.000266738	0.00276352
2195	ENSG00000083857	FAT1	FAT atypical cadherin 1	0.710354	6.66395	36.127	0.000266968	0.00276352
85379	ENSG00000197077	KIAA1671	KIAA1671	-0.431129	5.75035	35.1997	0.00026705	0.00276352
9128	ENSG00000136875	PRPF4	pre-mRNA processing factor 4	0.398342	6.63408	35.1829	0.0002675	0.00276656
1490	ENSG00000118523	CCN2	cellular communication network factor 2	1.21646	1.90607	35.1757	0.000267693	0.00276694
85462	ENSG00000137460	FHDC1	FH2 domain containing 1	0.415616	4.74253	35.1552	0.000268243	0.00277101
9885	ENSG00000130703	OSBPL2	oxysterol binding protein like 2	-0.331812	6.74529	35.1049	0.000269599	0.0027834
85363	ENSG00000132256	TRIM5	tripartite motif containing 5	-0.633206	4.05731	35.0823	0.000270209	0.00278806
129787	ENSG00000151353	TMEM18	transmembrane protein 18	0.496774	5.79368	35.0592	0.000270837	0.00279292
28990	ENSG00000034533	ASTE1	asteroid homolog 1	0.71157	3.82851	35.0458	0.000271201	0.00279504
23705	ENSG00000182985	CADM1	cell adhesion molecule 1	0.699941	5.54633	35.0376	0.000271424	0.00279571
23092	ENSG00000145819	ARHGAP26	Rho GTPase activating protein 26	1.53204	-0.277758	35.0211	0.000271875	0.00279834
392617	ENSG00000225968	ELFN1	extracellular leucine rich repeat and fibronectin type III domain containing 1	-1.49251	2.01005	35.0167	0.000271995	0.00279834
11282	ENSG00000161013	MGAT4B	alpha-1,3-mannosyl-glycoprotein 4-beta-N-acetylglucosaminyltransferase B	-0.475243	7.25991	34.9956	0.000272574	0.00280267
11282	ENSG00000284501	MGAT4B	alpha-1,3-mannosyl-glycoprotein 4-beta-N-acetylglucosaminyltransferase B	-0.475243	7.25991	34.9956	0.000272574	0.00280267
9772	ENSG00000177728	TMEM94	transmembrane protein 94	-0.737705	6.4622	35.8835	0.000273309	0.00280859
7405	ENSG00000198382	UVRAG	UV radiation resistance associated	-0.323662	5.83277	34.9548	0.000273694	0.00281092
10458	ENSG00000175866	BAIAP2	BAR/IMD domain containing adaptor protein 2	-0.401391	4.85675	34.9137	0.000274829	0.00282094
1201	ENSG00000188603	CLN3	CLN3 lysosomal/endosomal transmembrane protein, battenin	-0.330301	7.19596	34.9063	0.000275034	0.00282141
90627	ENSG00000133121	STARD13	StAR related lipid transfer domain containing 13	0.742875	5.91679	35.789	0.000275818	0.00282781
10962	ENSG00000213190	MLLT11	MLLT11 transcription factor 7 cofactor	-0.747769	3.65694	34.8571	0.000276402	0.00283216
79686	NA	NA	NA	1.27324	0.389764	34.8424	0.000276811	0.00283471
5198	ENSG00000178921	PFAS	phosphoribosylformylglycinamidine synthase	0.490362	5.45786	34.8259	0.000277271	0.00283614
760	ENSG00000104267	CA2	carbonic anhydrase 2	0.677732	4.28543	34.8298	0.000277164	0.00283614
124590	ENSG00000182040	USH1G	USH1 protein network component sans	-1.63101	0.0599094	34.8185	0.000277481	0.00283665
5433	ENSG00000144231	POLR2D	RNA polymerase II subunit D	0.355827	6.05474	34.7933	0.000278187	0.00284223
201895	ENSG00000163683	SMIM14	small integral membrane protein 14	-0.382818	8.30399	34.7589	0.000279157	0.00285049
11344	ENSG00000247596	TWF2	twinfilin actin binding protein 2	-0.488377	5.17093	34.6811	0.000281363	0.00287136
10801	ENSG00000184640	SEPTIN9	septin 9	0.283095	8.36518	34.6274	0.000282896	0.00288535
10801	ENSG00000282302	SEPTIN9	septin 9	0.283095	8.36518	34.6274	0.000282896	0.00288535
92856	ENSG00000136718	IMP4	IMP U3 small nucleolar ribonucleoprotein 4	0.511916	6.45125	34.5925	0.0002839	0.00289391
26509	ENSG00000138119	MYOF	myoferlin	0.646938	8.98759	35.463	0.0002847	0.00290041
545	ENSG00000175054	ATR	ATR serine/threonine kinase	0.565227	6.28069	34.5493	0.000285148	0.0029033
112840	ENSG00000140006	WDR89	WD repeat domain 89	0.564489	5.65115	34.5275	0.00028578	0.00290726
138199	ENSG00000156017	CARNMT1	carnosine N-methyltransferase 1	0.606671	4.58398	34.5133	0.000286193	0.00290726
1911	ENSG00000111752	PHC1	polyhomeotic homolog 1	-0.550608	3.44187	34.4964	0.000286686	0.00290726
28970	ENSG00000182919	C11orf54	chromosome 11 open reading frame 54	-0.462661	4.11566	34.5	0.000286582	0.00290726
51043	ENSG00000160685	ZBTB7B	zinc finger and BTB domain containing 7B	-0.348694	6.16563	34.5106	0.000286273	0.00290726
55615	ENSG00000186654	PRR5	proline rich 5	0.536233	3.42286	34.5152	0.000286137	0.00290726
744	ENSG00000066382	MPPED2	metallophosphoesterase domain containing 2	1.9343	1.00674	34.4965	0.000286685	0.00290726
8829	ENSG00000099250	NRP1	neuropilin 1	0.262502	7.75291	34.4582	0.000287803	0.00291691
83394	ENSG00000091622	PITPNM3	PITPNM family member 3	-1.38076	2.03457	34.4473	0.000288122	0.00291847
23138	ENSG00000145911	N4BP3	NEDD4 binding protein 3	-0.706982	7.23834	35.2429	0.000290898	0.00294387
55506	ENSG00000099284	MACROH2A2	macroH2A.2 histone	-0.400661	5.65754	34.3511	0.000290962	0.00294387
5036	ENSG00000170515	PA2G4	proliferation-associated 2G4	0.310742	8.37329	34.3325	0.000291516	0.00294779
64771	ENSG00000196821	ILRUN	inflammation and lipid regulator with UBA-like and NBR1-like domains	-0.285497	7.56349	34.3064	0.000292294	0.00295397
148709	ENSG00000234996	ACTG1P25	actin gamma 1 pseudogene 25	-0.930036	1.39008	34.2646	0.000293547	0.00296494
152926	ENSG00000163644	PPM1K	protein phosphatase, Mg2+/Mn2+ dependent 1K	0.47986	6.6603	34.2557	0.000293814	0.00296595
3691	ENSG00000132470	ITGB4	integrin subunit beta 4	-0.687767	7.40766	35.0783	0.000295645	0.00298272
9827	ENSG00000107185	RGP1	RGP1 homolog, RAB6A GEF complex partner 1	-0.674108	3.52503	34.1246	0.000297787	0.00300263
4641	ENSG00000197879	MYO1C	myosin IC	-0.26392	8.19472	34.0893	0.000298868	0.00301182
6549	ENSG00000115616	SLC9A2	solute carrier family 9 member A2	0.559641	5.58333	34.0661	0.000299581	0.00301728
65065	ENSG00000144426	NBEAL1	neurobeachin like 1	-0.484901	5.5036	34.0459	0.000300204	0.00302184
10540	ENSG00000175203	DCTN2	dynactin subunit 2	-0.280148	6.93842	33.9862	0.000302055	0.00303874
57149	ENSG00000102897	LYRM1	LYR motif containing 1	0.442894	5.13778	33.951	0.000303153	0.00304806
90441	ENSG00000173545	ZNF622	zinc finger protein 622	0.324217	6.43505	33.9396	0.000303508	0.0030499
55161	ENSG00000109133	TMEM33	transmembrane protein 33	0.361171	6.18289	33.8977	0.000304823	0.00306137
100129461	ENSG00000272142	LYRM4-AS1	LYRM4 antisense RNA 1	1.08123	1.97872	33.8774	0.000305463	0.00306388
51104	ENSG00000107362	ABHD17B	abhydrolase domain containing 17B, depalmitoylase	0.563188	4.34787	33.8774	0.000305462	0.00306388
8706	ENSG00000169255	B3GALNT1	beta-1,3-N-acetylgalactosaminyltransferase 1 (globoside blood group)	0.464014	6.93086	33.8733	0.000305592	0.00306388
9702	ENSG00000166037	CEP57	centrosomal protein 57	-0.427893	4.73463	33.8549	0.000306173	0.00306797
2130	ENSG00000182944	EWSR1	EWS RNA binding protein 1	0.35747	7.91344	33.8266	0.000307069	0.0030752
554206	ENSG00000291179	LOC554206	leucine carboxyl methyltransferase 1 pseudogene	0.726834	2.6293	33.7953	0.000308065	0.00308343
79170	ENSG00000167183	PRR15L	proline rich 15 like	-0.439737	5.74843	33.7855	0.000308379	0.00308484
161835	ENSG00000150667	FSIP1	fibrous sheath interacting protein 1	1.44441	-0.146854	33.774	0.000308744	0.00308675
66008	ENSG00000115993	TRAK2	trafficking kinesin protein 2	-0.380405	6.33841	33.7208	0.000310452	0.00310207
3624	ENSG00000122641	INHBA	inhibin subunit beta A	1.08396	0.64978	33.6843	0.00031163	0.00311208
64061	ENSG00000184205	TSPYL2	TSPY like 2	-0.616135	4.72577	33.6717	0.000312035	0.00311437
79789	ENSG00000165959	CLMN	calmin	-0.336173	5.93855	33.6626	0.00031233	0.00311556
9267	ENSG00000108669	CYTH1	cytohesin 1	-0.453417	5.60103	33.6525	0.000312657	0.00311707
57630	ENSG00000154447	SH3RF1	SH3 domain containing ring finger 1	-0.42368	5.00639	33.6314	0.000313344	0.00312215
64421	ENSG00000152457	DCLRE1C	DNA cross-link repair 1C	-0.335111	5.26551	33.6082	0.000314102	0.00312795
29998	ENSG00000063169	BICRA	BRD4 interacting chromatin remodeling complex associated protein	-0.65364	4.49761	33.5911	0.000314661	0.00313067
9141	ENSG00000105185	PDCD5	programmed cell death 5	0.324359	5.63278	33.589	0.000314729	0.00313067
9867	ENSG00000198961	PJA2	praja ring finger ubiquitin ligase 2	-0.399367	6.77784	33.5727	0.000315262	0.00313421
401303	NA	ZNF815P	zinc finger protein 815, pseudogene	-1.12821	2.21752	33.5491	0.000316038	0.00313666
55027	ENSG00000155393	HEATR3	HEAT repeat containing 3	0.459368	4.39333	33.549	0.00031604	0.00313666
5771	ENSG00000175354	PTPN2	protein tyrosine phosphatase non-receptor type 2	0.487287	5.17673	33.5534	0.000315894	0.00313666
8110	ENSG00000205683	DPF3	double PHD fingers 3	-1.4125	0.742427	33.5053	0.000317482	0.00314921
27107	ENSG00000066422	ZBTB11	zinc finger and BTB domain containing 11	0.340816	6.59449	33.4809	0.00031829	0.00315545
27351	ENSG00000100418	DESI1	desumoylating isopeptidase 1	0.401116	5.03561	33.4629	0.00031889	0.00315786
51163	ENSG00000138231	DBR1	debranching RNA lariats 1	0.385121	5.31834	33.4666	0.000318765	0.00315786
100129269	NA	LINC01160	long intergenic non-protein coding RNA 1160	2.10768	-0.78406	33.3943	0.000321179	0.00317876
55561	ENSG00000171219	CDC42BPG	CDC42 binding protein kinase gamma	-0.590428	6.36648	33.3776	0.00032174	0.00318252
55824	ENSG00000076641	PAG1	phosphoprotein membrane anchor with glycosphingolipid microdomains 1	1.11309	0.367209	33.362	0.000322267	0.00318597
257415	ENSG00000234545	FAM133B	family with sequence similarity 133 member B	0.398817	5.18832	33.3526	0.000322582	0.0031873
130574	ENSG00000187123	LYPD6	LY6/PLAUR domain containing 6	0.929701	6.36357	35.0478	0.000322792	0.0031876
100129480	ENSG00000225526	MKRN2OS	MKRN2 opposite strand	-0.71667	2.51829	33.3248	0.000323521	0.00319124
85442	ENSG00000171798	KNDC1	kinase non-catalytic C-lobe domain containing 1	-0.863899	5.20261	34.1744	0.000323483	0.00319124
29107	ENSG00000132661	NXT1	nuclear transport factor 2 like export factor 1	0.524388	5.26006	33.2864	0.000324825	0.00320232
3667	ENSG00000169047	IRS1	insulin receptor substrate 1	0.474866	8.58323	33.2484	0.000326121	0.0032132
79674	ENSG00000197415	VEPH1	ventricular zone expressed PH domain containing 1	1.27543	2.87203	33.2434	0.000326293	0.0032132
4869	ENSG00000181163	NPM1	nucleophosmin 1	0.424752	9.88142	33.23	0.000326753	0.00321595
1723	ENSG00000102967	DHODH	dihydroorotate dehydrogenase (quinone)	0.612167	4.59564	33.2159	0.000327237	0.00321892
115572	ENSG00000158246	TENT5B	terminal nucleotidyltransferase 5B	-0.739586	2.82746	33.1715	0.000328764	0.00322856
79066	ENSG00000127804	METTL16	methyltransferase 16, RNA N6-adenosine	0.369021	5.65764	33.1744	0.000328664	0.00322856
79414	ENSG00000126243	LRFN3	leucine rich repeat and fibronectin type III domain containing 3	-0.683766	3.71405	33.1761	0.000328605	0.00322856
55625	ENSG00000153786	ZDHHC7	zinc finger DHHC-type palmitoyltransferase 7	-0.499966	7.51679	33.1492	0.000329536	0.00323435
80273	ENSG00000109519	GRPEL1	GrpE like 1, mitochondrial	0.35011	6.08243	33.1402	0.000329846	0.0032356
57711	ENSG00000186020	ZNF529	zinc finger protein 529	0.805241	3.51196	33.1228	0.000330452	0.00323975
10452	ENSG00000130204	TOMM40	translocase of outer mitochondrial membrane 40	0.33841	6.81322	33.1068	0.000331008	0.0032434
89766	ENSG00000177398	UMODL1	uromodulin like 1	1.56172	0.0745653	33.0563	0.000332775	0.00325891
11222	ENSG00000114686	MRPL3	mitochondrial ribosomal protein L3	0.426125	7.31304	33.0316	0.000333642	0.00326559
54619	ENSG00000107443	CCNJ	cyclin J	0.402726	4.64117	33.0219	0.000333981	0.00326711
101929748	ENSG00000288062	LOC101929748	uncharacterized LOC101929748	2.51585	-1.3525	32.9127	0.000337853	0.00329959
23002	ENSG00000100592	DAAM1	dishevelled associated activator of morphogenesis 1	0.387362	6.94958	32.9174	0.000337685	0.00329959
6578	ENSG00000174640	SLCO2A1	solute carrier organic anion transporter family member 2A1	2.0925	-1.21424	32.9125	0.00033786	0.00329959
135293	ENSG00000146281	PM20D2	peptidase M20 domain containing 2	0.505889	4.00916	32.9016	0.000338251	0.00329976
55315	ENSG00000198246	SLC29A3	solute carrier family 29 member 3	0.579041	3.94923	32.9062	0.000338087	0.00329976
933	ENSG00000012124	CD22	CD22 molecule	2.3434	1.01575	33.4202	0.000338494	0.00330031
79683	ENSG00000175048	ZDHHC14	zinc finger DHHC-type palmitoyltransferase 14	0.590932	3.03966	32.8816	0.000338967	0.0033013
993	ENSG00000164045	CDC25A	cell division cycle 25A	0.552893	4.26348	32.885	0.000338847	0.0033013
23349	ENSG00000122733	PHF24	PHD finger protein 24	2.46217	-1.85643	32.8743	0.00033923	0.00330204
55964	ENSG00000100167	SEPTIN3	septin 3	-1.00595	2.2565	32.8365	0.00034059	0.00331345
11329	ENSG00000112079	STK38	serine/threonine kinase 38	-0.305237	6.62621	32.8236	0.000341056	0.00331544
80331	ENSG00000101152	DNAJC5	DnaJ heat shock protein family (Hsp40) member C5	-0.273549	7.55393	32.8205	0.000341169	0.00331544
81611	ENSG00000143401	ANP32E	acidic nuclear phosphoprotein 32 family member E	-0.371794	6.90663	32.7339	0.000344315	0.00334418
27000	ENSG00000105821	DNAJC2	DnaJ heat shock protein family (Hsp40) member C2	0.48427	6.03626	32.7067	0.000345314	0.00335204
140461	ENSG00000177981	ASB8	ankyrin repeat and SOCS box containing 8	-0.343952	5.30156	32.6756	0.000346454	0.00336127
220906	NA	WAC-AS1	WAC antisense RNA 1 (head to head)	0.343536	6.11743	32.6667	0.000346785	0.00336264
640	ENSG00000136573	BLK	BLK proto-oncogene, Src family tyrosine kinase	2.74459	-1.33305	32.63	0.000348141	0.00337394
640	ENSG00000285369	BLK	BLK proto-oncogene, Src family tyrosine kinase	2.74459	-1.33305	32.63	0.000348141	0.00337394
55333	ENSG00000213463	SYNJ2BP	synaptojanin 2 binding protein	-0.447396	6.43519	32.6025	0.000349162	0.00338198
6936	ENSG00000005436	GCFC2	GC-rich sequence DNA-binding factor 2	0.549465	4.13794	32.5951	0.000349438	0.0033828
493812	ENSG00000228223	HCG11	HLA complex group 11	0.516685	4.16631	32.579	0.000350037	0.00338675
493812	ENSG00000292174	HCG11	HLA complex group 11	0.516685	4.16631	32.579	0.000350037	0.00338675
57727	ENSG00000124160	NCOA5	nuclear receptor coactivator 5	0.60423	6.32757	32.5451	0.000351305	0.00339531
6835	ENSG00000148291	SURF2	surfeit 2	0.417073	4.83712	32.5494	0.000351143	0.00339531
6835	ENSG00000281024	SURF2	surfeit 2	0.417073	4.83712	32.5494	0.000351143	0.00339531
143879	ENSG00000182359	KBTBD3	kelch repeat and BTB domain containing 3	-0.912152	1.24669	32.4975	0.000353096	0.00341076
23596	ENSG00000054277	OPN3	opsin 3	0.67833	4.07673	32.4893	0.000353403	0.00341186
23596	ENSG00000203668	OPN3	opsin 3	0.67833	4.07673	32.4893	0.000353403	0.00341186
25896	ENSG00000143493	INTS7	integrator complex subunit 7	0.79314	4.90321	32.7961	0.00035507	0.00342422
55308	ENSG00000168872	DDX19A	DEAD-box helicase 19A	0.391584	6.39357	32.4464	0.000355029	0.00342422
119559	ENSG00000183605	SFXN4	sideroflexin 4	0.435445	4.78713	32.4395	0.000355292	0.0034245
54984	ENSG00000254093	PINX1	PIN2 (TERF1) interacting telomerase inhibitor 1	0.69053	3.08228	32.4174	0.000356132	0.00342712
54984	ENSG00000258724	PINX1	PIN2 (TERF1) interacting telomerase inhibitor 1	0.69053	3.08228	32.4174	0.000356132	0.00342712
54984	ENSG00000284764	PINX1	PIN2 (TERF1) interacting telomerase inhibitor 1	0.69053	3.08228	32.4174	0.000356132	0.00342712
823	ENSG00000014216	CAPN1	calpain 1	-0.300789	8.30874	32.4171	0.000356145	0.00342712
995	ENSG00000158402	CDC25C	cell division cycle 25C	-0.802474	2.9731	32.4252	0.000355834	0.00342712
115557	ENSG00000240771	ARHGEF25	Rho guanine nucleotide exchange factor 25	-0.910587	4.139	32.5583	0.000357601	0.00343553
51575	ENSG00000089048	ESF1	ESF1 nucleolar pre-rRNA processing protein homolog	1.15131	5.80048	34.8416	0.000357376	0.00343553
6772	ENSG00000115415	STAT1	signal transducer and activator of transcription 1	-0.329303	10.1749	32.3806	0.000357537	0.00343553
55150	ENSG00000221916	C19orf73	chromosome 19 open reading frame 73	0.947436	1.44306	32.3231	0.00035975	0.00345144
55621	ENSG00000104907	TRMT1	tRNA methyltransferase 1	0.599439	5.11115	32.3223	0.000359779	0.00345144
57460	ENSG00000111110	PPM1H	protein phosphatase, Mg2+/Mn2+ dependent 1H	-0.423412	6.78451	32.3196	0.000359885	0.00345144
9448	ENSG00000071054	MAP4K4	mitogen-activated protein kinase kinase kinase kinase 4	-0.34488	6.95525	32.3157	0.000360037	0.00345144
91694	ENSG00000154359	LONRF1	LON peptidase N-terminal domain and ring finger 1	0.349861	5.04831	32.2995	0.000360661	0.00345555
91694	ENSG00000285360	LONRF1	LON peptidase N-terminal domain and ring finger 1	0.349861	5.04831	32.2995	0.000360661	0.00345555
2040	ENSG00000148175	STOM	stomatin	-0.292796	7.68988	32.2659	0.000361966	0.00346244
25842	ENSG00000111875	ASF1A	anti-silencing function 1A histone chaperone	-0.392063	5.21841	32.2704	0.00036179	0.00346244
85461	ENSG00000115183	TANC1	tetratricopeptide repeat, ankyrin repeat and coiled-coil containing 1	0.395472	6.18264	32.2743	0.00036164	0.00346244
54477	ENSG00000052126	PLEKHA5	pleckstrin homology domain containing A5	-0.595121	4.25126	32.2584	0.000362258	0.00346336
55337	ENSG00000130813	SHFL	shiftless antiviral inhibitor of ribosomal frameshifting	-0.743071	5.25434	32.607	0.000362715	0.00346585
5792	ENSG00000142949	PTPRF	protein tyrosine phosphatase receptor type F	-0.340097	8.57414	32.2188	0.000363804	0.00347438
23177	ENSG00000011523	CEP68	centrosomal protein 68	0.445799	4.82408	32.2015	0.00036448	0.00347897
5777	ENSG00000111679	PTPN6	protein tyrosine phosphatase non-receptor type 6	-0.386693	4.95617	32.1795	0.000365344	0.00348533
11219	ENSG00000183479	TREX2	three prime repair exonuclease 2	1.19783	0.654755	32.1624	0.00036602	0.00348673
55274	ENSG00000130024	PHF10	PHD finger protein 10	-0.386681	4.94429	32.1608	0.000366081	0.00348673
79188	ENSG00000170876	TMEM43	transmembrane protein 43	0.396201	7.20622	32.1638	0.000365962	0.00348673
200186	ENSG00000160741	CRTC2	CREB regulated transcription coactivator 2	-0.389849	5.82605	32.1409	0.000366869	0.00349236
8675	ENSG00000124222	STX16	syntaxin 16	-0.429784	8.10461	32.134	0.00036714	0.00349306
1468	ENSG00000183048	SLC25A10	solute carrier family 25 member 10	-0.290648	6.06139	32.1126	0.000367988	0.00349924
1106	ENSG00000173575	CHD2	chromodomain helicase DNA binding protein 2	-0.29467	7.46945	32.0952	0.000368679	0.00350205
54881	ENSG00000136891	TEX10	testis expressed 10	0.422816	5.93013	32.0997	0.000368502	0.00350205
105374156	NA	NA	NA	1.90958	-0.84531	32.0409	0.00037085	0.00352079
118672	ENSG00000179988	PSTK	phosphoseryl-tRNA kinase	1.21982	1.60517	32.0114	0.000372034	0.00353014
374383	ENSG00000188211	NCR3LG1	natural killer cell cytotoxicity receptor 3 ligand 1	0.476961	4.40054	32.0005	0.000372473	0.00353052
8554	ENSG00000033800	PIAS1	protein inhibitor of activated STAT 1	-0.339879	5.84126	32.0023	0.000372399	0.00353052
84304	ENSG00000149761	NUDT22	nudix hydrolase 22	-0.430705	5.28545	31.9881	0.000372972	0.00353336
220042	ENSG00000165490	DDIAS	DNA damage induced apoptosis suppressor	0.702751	4.72804	31.9695	0.000373721	0.00353856
25943	ENSG00000088854	DNAAF9	dynein axonemal assembly factor 9	-0.673059	4.74218	31.9496	0.000374528	0.00354241
84818	ENSG00000163702	IL17RC	interleukin 17 receptor C	-0.293183	5.94934	31.9538	0.00037436	0.00354241
91661	ENSG00000196417	ZNF765	zinc finger protein 765	0.492315	4.61138	31.9209	0.000375695	0.00355156
2553	ENSG00000104064	GABPB1	GA binding protein transcription factor subunit beta 1	0.365395	5.79874	31.8967	0.000376683	0.00355899
57481	ENSG00000250423	KIAA1210	KIAA1210	3.1342	-2.17994	31.8877	0.000377051	0.00356057
123283	ENSG00000185418	TARS3	threonyl-tRNA synthetase 3	0.811815	3.88515	31.8762	0.00037752	0.00356143
160418	ENSG00000139324	TMTC3	transmembrane O-mannosyltransferase targeting cadherins 3	-0.417679	6.23308	31.8756	0.000377544	0.00356143
10906	ENSG00000135148	TRAFD1	TRAF-type zinc finger domain containing 1	-0.390792	6.17765	31.866	0.000377941	0.00356327
26010	ENSG00000196141	SPATS2L	spermatogenesis associated serine rich 2 like	0.705254	7.4549	32.5827	0.000380879	0.00358906
56243	ENSG00000120549	KIAA1217	KIAA1217	-0.424925	6.64018	31.7719	0.000381824	0.00359414
8661	ENSG00000107581	EIF3A	eukaryotic translation initiation factor 3 subunit A	0.364922	8.67284	31.7723	0.000381806	0.00359414
140	ENSG00000282608	ADORA3	adenosine A3 receptor	2.75814	-2.00035	31.7407	0.000383122	0.00360333
90025	ENSG00000118420	UBE3D	ubiquitin protein ligase E3D	0.665551	2.45095	31.7387	0.000383207	0.00360333
113000	ENSG00000007376	RPUSD1	RNA pseudouridine synthase domain containing 1	0.302691	5.77104	31.7317	0.000383497	0.00360414
55244	ENSG00000142494	SLC47A1	solute carrier family 47 member 1	2.94717	0.0950557	32.0623	0.000383835	0.0036054
57587	ENSG00000164323	CFAP97	cilia and flagella associated protein 97	0.422537	5.59789	31.694	0.000385076	0.00361514
1012	ENSG00000140945	CDH13	cadherin 13	-0.783078	1.80346	31.6755	0.000385856	0.00362055
10382	ENSG00000104833	TUBB4A	tubulin beta 4A class IVa	-1.87194	0.730518	31.662	0.000386422	0.00362393
79611	ENSG00000111058	ACSS3	acyl-CoA synthetase short chain family member 3	-0.459393	6.08634	31.6322	0.000387683	0.00363216
9868	ENSG00000154174	TOMM70	translocase of outer mitochondrial membrane 70	0.343701	7.54228	31.6315	0.00038771	0.00363216
114796	ENSG00000230487	PSMG3-AS1	PSMG3 antisense RNA 1 (head to head)	-0.342417	5.8991	31.6238	0.000388039	0.00363222
94103	ENSG00000172057	ORMDL3	ORMDL sphingolipid biosynthesis regulator 3	-0.359459	5.1511	31.6217	0.000388126	0.00363222
147657	ENSG00000198464	ZNF480	zinc finger protein 480	0.767625	5.12558	32.1066	0.000388497	0.00363377
4337	ENSG00000124615	MOCS1	molybdenum cofactor synthesis 1	-0.592973	3.50356	31.5648	0.000390549	0.00365066
53938	ENSG00000240344	PPIL3	peptidylprolyl isomerase like 3	-0.371492	5.01787	31.5585	0.000390816	0.00365066
56915	ENSG00000077348	EXOSC5	exosome component 5	0.557883	4.92681	31.5561	0.000390921	0.00365066
286207	ENSG00000160401	CFAP157	cilia and flagella associated protein 157	0.590943	2.88201	31.5361	0.000391775	0.00365478
84255	ENSG00000157800	SLC37A3	solute carrier family 37 member 3	0.39061	6.09612	31.5366	0.000391754	0.00365478
673	ENSG00000157764	BRAF	B-Raf proto-oncogene, serine/threonine kinase	-0.387418	5.61626	31.4986	0.00039339	0.00366791
10492	ENSG00000135316	SYNCRIP	synaptotagmin binding cytoplasmic RNA interacting protein	0.435265	8.50302	31.4667	0.000394768	0.00367882
4141	ENSG00000166986	MARS1	methionyl-tRNA synthetase 1	0.30296	7.77422	31.4299	0.000396363	0.00369174
4041	ENSG00000162337	LRP5	LDL receptor related protein 5	-0.330289	7.0681	31.4149	0.000397018	0.0036959
54980	ENSG00000115998	C2orf42	chromosome 2 open reading frame 42	0.482933	3.96574	31.393	0.000397972	0.00370089
6525	ENSG00000183963	SMTN	smoothelin	-0.414844	4.65779	31.3942	0.00039792	0.00370089
23368	ENSG00000088808	PPP1R13B	protein phosphatase 1 regulatory subunit 13B	-0.39217	6.35098	31.36	0.000399417	0.00371237
126374	ENSG00000142279	WTIP	WT1 interacting protein	-0.818525	2.1449	31.3357	0.000400488	0.00372038
78994	ENSG00000156858	PRR14	proline rich 14	-0.339776	6.34578	31.3282	0.000400818	0.00372149
5236	ENSG00000079739	PGM1	phosphoglucomutase 1	-0.548965	4.94051	31.3139	0.000401448	0.00372539
51236	ENSG00000235173	HGH1	HGH1 homolog	0.361212	5.34806	31.2745	0.000403195	0.00373964
1183	ENSG00000073464	CLCN4	chloride voltage-gated channel 4	0.880972	1.55188	31.2643	0.000403648	0.00374188
64101	ENSG00000128594	LRRC4	leucine rich repeat containing 4	1.4041	0.0382369	31.2532	0.000404143	0.00374451
23384	ENSG00000100014	SPECC1L	sperm antigen with calponin homology and coiled-coil domains 1 like	0.353279	5.23595	31.2316	0.000405106	0.00375147
642938	ENSG00000188916	INSYN2A	inhibitory synaptic factor 2A	1.1584	0.595032	31.2216	0.000405557	0.00375368
10884	ENSG00000112996	MRPS30	mitochondrial ribosomal protein S30	0.465299	6.14576	31.1987	0.000406582	0.0037612
10501	ENSG00000167680	SEMA6B	semaphorin 6B	-0.857834	4.80754	31.948	0.000407258	0.00376411
26056	ENSG00000135631	RAB11FIP5	RAB11 family interacting protein 5	-1.17805	2.95076	31.1822	0.000407322	0.00376411
8743	ENSG00000121858	TNFSF10	TNF superfamily member 10	-1.0077	1.15232	31.1678	0.000407973	0.00376816
23545	ENSG00000185344	ATP6V0A2	ATPase H+ transporting V0 subunit a2	0.374159	5.20315	31.1526	0.000408658	0.00377253
1027	ENSG00000111276	CDKN1B	cyclin dependent kinase inhibitor 1B	-0.36892	6.62787	31.1385	0.000409293	0.00377641
5932	ENSG00000101773	RBBP8	RB binding protein 8, endonuclease	0.878675	5.85309	32.1234	0.000410421	0.00378486
[truncated: 16,842 more rows]
