# Supplementary material for: A novel ARMC5-containing ubiquitin ligase controls the degradation of HSPA1A and its client protein estrogen receptor alpha
Source: Research Square preprint supplement (doi:10.21203/rs.3.rs-8810312/v1), 2026-02-22
Supplement: Supplementary file 3 [file 1f5aaca40892ea58e2a806a6.xlsx]

## Sheet: S-Table 8 E2_vs_NE_edgeR_log2CP
S-Table 8. EREs with significantly different peak density (p<0.05 and FC>2) in ERa ChIP-seq of vector-transfected MCF7 cells in the presence of E2 versus vehicle
V4	V1	V2	V3	Gene Symbol	log2FC	p-value	FDR	Annotation
region_3503	3	193879667	193879682	LINC02038	5.83008	0.00271922	0.999566	Intron (ENST00000804627.1/ENST00000804627.1, intron 1 of 3)
region_7976	9	92132830	92132845	LOC100128076	-5.35281	0.00498626	0.999566	Promoter (<=1kb)
region_6172	7	39042837	39042852	POU6F2-AS2	-5.21454	0.00728063	0.999566	Intron (ENST00000518318.7/11281, intron 1 of 9)
region_12	1	136695	136710	LOC729737	-5.20815	0.0075054	0.999566	Intron (ENST00000831081.1/124900384, intron 5 of 6)
region_7458	8	125750844	125750859	LOC105375747	-5.16894	0.00834026	0.999566	Promoter (<=1kb)
region_2933	3	64380287	64380302	PRICKLE2-DT	-3.69538	0.0088812	0.999566	Intron (ENST00000295902.11/166336, intron 2 of 8)
region_11	1	136646	136661	LOC729737	-5.07585	0.0108414	0.999566	Intron (ENST00000831081.1/124900384, intron 5 of 6)
region_1558	2	32984864	32984879	LTBP1	-5.02476	0.0125745	0.999566	Intron (ENST00000404816.7/4052, intron 2 of 33)
region_14440	20	50066326	50066341	LOC105372655	-5.01468	0.0132232	0.999566	Intron (ENST00000816220.1/ENST00000816220.1, intron 2 of 2)
region_2575	2	240471327	240471342	GPC1-AS1	-5.01428	0.0132338	0.999566	Intron (ENST00000770371.1/51281, intron 1 of 1)
region_12983	17	60085706	60085721	WFDC21P	-3.23237	0.01354	0.999566	Intron (ENST00000589740.2/105371849, intron 1 of 1)
region_2446	2	221278112	221278127	EPHA4	5.20512	0.014121	0.999566	Distal Intergenic
region_13528	18	79411149	79411164	LOC124904333	5.17936	0.0149415	0.999566	Exon (ENST00000253506.9/4772, exon 2 of 10)
region_3840	4	56477373	56477388	LOC124900706	3.72035	0.0164776	0.999566	Intron (ENST00000510663.6/6731, intron 6 of 16)
region_11529	15	40918596	40918611	DLL4	-4.9223	0.0171909	0.999566	Intron (ENST00000810920.1/ENST00000810920.1, intron 1 of 1)
region_11703	15	69848725	69848740	LINC00593	5.10325	0.0174554	0.999566	Intron (ENST00000798881.1/414926, intron 3 of 3)
region_362	1	32441313	32441328	ZBTB8A	-4.9017	0.0178851	0.999566	Intron (ENST00000806164.1/ENST00000806164.1, intron 1 of 1)
region_5420	6	43047585	43047600	KLC4	-4.87032	0.0201868	0.999566	Intron (ENST00000467906.5/89953, intron 2 of 17)
region_9529	11	85539236	85539251	DLG2	-4.87022	0.0201911	0.999566	Intron (ENST00000706233.1/1740, intron 2 of 25)
region_12873	17	45124703	45124718	ACBD4	5.03931	0.0206262	0.999566	Intron (ENST00000619929.5/113026, intron 1 of 14)
region_7990	9	93072384	93072399	SUSD3	4.96606	0.0244081	0.999566	Intron (ENST00000617293.4/203328, intron 1 of 3)
region_12423	16	80858270	80858285	CDYL2	-3.25613	0.0244862	0.999566	Intron (ENST00000562231.6/100996425, intron 1 of 2)
region_10355	12	115870383	115870398	LINC02463	3.53659	0.0252448	0.999566	Intron (ENST00000546414.1/105370004, intron 1 of 2)
region_14172	20	5603815	5603830	GPCPD1	4.90601	0.028176	0.999566	Intron (ENST00000718343.1/56261, intron 2 of 19)
region_852	1	154820464	154820479	KCNN3	-4.7098	0.0311527	0.999566	Intron (ENST00000271915.9/3782, intron 2 of 7)
region_7326	8	96317191	96317206	PTDSS1	-4.7098	0.0311527	0.999566	Intron (ENST00000517309.6/9791, intron 9 of 12)
region_6786	7	144741239	144741254	TPK1	-4.70969	0.0311566	0.999566	Intron (ENST00000360057.7/27010, intron 3 of 8)
region_4866	5	132579327	132579342	IL5	-4.70946	0.0311762	0.999566	3' UTR
region_1007	1	185451368	185451383	LOC107985239	-4.71003	0.0311806	0.999566	Intron (ENST00000753885.1/ENST00000753885.1, intron 2 of 2)
region_5009	5	155677883	155677898	SGCD	-4.71003	0.0311806	0.999566	Distal Intergenic
region_12939	17	51959632	51959647	CA10	-4.71003	0.0311806	0.999566	Intron (ENST00000570565.5/56934, intron 2 of 8)
region_3355	3	161367110	161367125	SPTSSB	4.88486	0.0314075	0.999566	Intron (ENST00000620149.2/165679, intron 1 of 2)
region_2549	2	237510252	237510267	MIR6811	3.31655	0.0390115	0.999566	Promoter (<=1kb)
region_10076	12	56099366	56099381	PA2G4	4.75503	0.0403266	0.999566	Promoter (1-2kb)
region_10	1	136597	136612	LOC729737	-3.36042	0.0409979	0.999566	Intron (ENST00000831081.1/124900384, intron 5 of 6)
region_15723	X	153553944	153553959	ATP2B3	-4.58708	0.0414143	0.999566	Intron (ENST00000263519.5/492, intron 13 of 21)
region_1486	2	20381489	20381504	PUM2	2.53545	0.0428877	0.999566	Distal Intergenic
region_10618	13	41102077	41102092	MIR3168	2.87298	0.0434533	0.999566	Promoter (<=1kb)
region_8295	9	137033074	137033089	ABCA2	-3.3928	0.0435026	0.999566	Exon (ENST00000623196.1/401563, exon 2 of 3)
region_3882	4	70794514	70794529	GRSF1	-4.55814	0.0445138	0.999566	Intron (ENST00000381006.8/22902, intron 13 of 17)
region_13200	18	6538768	6538783	L3MBTL4	-4.55814	0.0445138	0.999566	Intron (ENST00000756313.1/ENST00000756313.1, intron 2 of 2)
region_8358	10	6343971	6343986	LINC02656	-4.55826	0.0445429	0.999566	Intron (ENST00000783922.1/399715, intron 2 of 3)
region_11910	16	1090888	1090903	C1QTNF8	-4.55764	0.0445674	0.999566	Intron (ENST00000328449.6/390664, intron 4 of 4)
region_12574	17	4150819	4150834	CYB5D2	-4.55764	0.0445674	0.999566	Intron (ENST00000577075.6/124936, intron 2 of 3)
region_7245	8	74635703	74635718	LINC03071	2.84223	0.0460885	0.999566	Promoter (2-3kb)
region_11715	15	71104874	71104889	THSD4	2.3657	0.04612	0.999566	Intron (ENST00000796204.1/ENST00000796204.1, intron 1 of 1)
region_2942	3	65718128	65718143	MAGI1-AS1	3.23063	0.0471202	0.999566	Intron (ENST00000330909.12/9223, intron 1 of 24)
region_3415	3	177687082	177687097	LOC124900562	-3.35539	0.0477535	0.999566	Intron (ENST00000850223.1/100505566, intron 4 of 4)
region_4029	4	109541507	109541522	MCUB	-4.52856	0.0479184	0.999566	Distal Intergenic
region_4597	5	62831327	62831342	IPO11-LRRC70	-4.52856	0.0479184	0.999566	Distal Intergenic
region_5493	6	61052795	61052810	KHDRBS2	-4.52856	0.0479184	0.999566	Distal Intergenic
region_6012	7	4062608	4062623	LOC105375131	-4.52856	0.0479184	0.999566	Intron (ENST00000404826.7/221935, intron 19 of 44)
region_7141	8	52376034	52376049	ST18	-4.52856	0.0479184	0.999566	Intron (ENST00000689386.1/9705, intron 2 of 25)
region_7919	9	82691704	82691719	LOC124902189	-4.52856	0.0479184	0.999566	Intron (ENST00000637606.1/107987087, intron 9 of 9)
region_481	1	48698099	48698114	BEND5	-4.52869	0.0479196	0.999566	Intron (ENST00000371839.6/84871, intron 6 of 13)
region_15732	X	154542697	154542712	IKBKG	-4.52869	0.0479196	0.999566	Promoter (1-2kb)
region_10570	13	30999948	30999963	LOC105370145	-4.52881	0.0479508	0.999566	Intron (ENST00000799654.1/ENST00000799654.1, intron 1 of 2)
region_14875	22	25468583	25468598	MIR6817	-4.51091	0.0479853	0.999566	Intron (ENST00000818137.1/1416, intron 5 of 5)
region_1319	1	239818405	239818420	CHRM3-AS2	-4.52794	0.0480497	0.999566	Intron (ENST00000468573.5/1131, intron 6 of 8)
region_10340	12	113376232	113376247	SLC8B1	-3.34341	0.048516	0.999566	Intron (ENST00000545182.6/196463, intron 5 of 10)
region_2923	3	62918338	62918353	LINC00698	-3.36059	0.0490508	0.999566	Intron (ENST00000761991.1/ENST00000761991.1, intron 1 of 3)
