# Supplementary material for: A novel ARMC5-containing ubiquitin ligase controls the degradation of HSPA1A and its client protein estrogen receptor alpha
Source: Research Square preprint supplement (doi:10.21203/rs.3.rs-8810312/v1), 2026-02-22
Supplement: Supplementary file 4 [file 4cb8e58f703e0568bd93d803.docx]

***Supplementary Table 2. Sequences of PCR primers***

|  | Forward 5’ to 3’ | Reverse 5’ to 3’ |
| --- | --- | --- |
| Mouse *Hspa1a* | CTTCAACATGAAGAGCGCCG | CAGCAATCTTGGAAAGGCCCC |
| Mouse *Esr1* | AAGACGCTCTTGAACCAGCA | TCTCCAGGTAGTAGGGCACC |
| Mouse *β-actin* | TCGTACCACAGGCATTGTGATGGA | TGATGTCACGCACGATTTTCT |
| Human *Hspa1a* | TGGTGCTGACGAAGATGAAG | CCGCTGAGAGTCGTTGAAGGT |
| Human Esr1 | ACGCTCTCGCTTGATCACAC | CGAGTTACAGACTGGCTCCC |
| Human β-actin | AGAAAATCTGGCACCACACC | AGAGGCGTACAGGGATAGCA |
