# Supplementary material for: A novel ARMC5-containing ubiquitin ligase controls the degradation of HSPA1A and its client protein estrogen receptor alpha
Source: Research Square preprint supplement (doi:10.21203/rs.3.rs-8810312/v1), 2026-02-22
Supplement: Supplementary file 5 [file 63d5678acb4c5c6cbf6c91f1.xlsx]

## Sheet: ARMC5_only_up_BP
S-Table 5. GO analysis in terms of the biological processes for genes that were upregulated in MCF7 cells overexpressing ARMC5 in the presence versus absence of E2
ID	Description	Gene Ratio	Background Ratio	Rich Factor	Fold Enrichment	Z-Score	p-value	Adjusted p-value	q-value	Gene ID	Count
GO:0046887	positive regulation of hormone secretion	6/107	147/18986	0.0408163	7.24242	5.71992	0.000184886	0.126675	0.118816	PRKCE/IRS2/INHBA/BMP6/C1QTNF1/TRH	6
GO:0090100	positive regulation of transmembrane receptor protein serine/threonine kinase signaling pathway	5/107	109/18986	0.0458716	8.13942	5.62752	0.000379809	0.126675	0.118816	CDH5/INHBA/BMP6/CITED1/BMPER	5
GO:0051047	positive regulation of secretion	8/107	322/18986	0.0248447	4.40843	4.64395	0.000477516	0.126675	0.118816	PRKCE/IRS2/INHBA/FGR/NPR1/BMP6/C1QTNF1/TRH	8
GO:0035929	steroid hormone secretion	3/107	28/18986	0.107143	19.0113	7.1802	0.000514533	0.126675	0.118816	INHBA/BMP6/C1QTNF1	3
GO:0050731	positive regulation of peptidyl-tyrosine phosphorylation	5/107	118/18986	0.0423729	7.51861	5.34738	0.000546506	0.126675	0.118816	HBEGF/THBS4/IL12A/AREG/BMP6	5
GO:1904659	D-glucose transmembrane transport	5/107	118/18986	0.0423729	7.51861	5.34738	0.000546506	0.126675	0.118816	IRS2/FABP5/SLC2A14/FGF19/KLF15	5
GO:0072001	renal system development	8/107	332/18986	0.0240964	4.27564	4.53302	0.000583912	0.126675	0.118816	HPGD/BMP6/CITED1/KLF15/FOXF1/PCSK9/CALB1/BMPER	8
GO:0008645	hexose transmembrane transport	5/107	121/18986	0.0413223	7.3322	5.2605	0.00061272	0.126675	0.118816	IRS2/FABP5/SLC2A14/FGF19/KLF15	5
GO:0015749	monosaccharide transmembrane transport	5/107	124/18986	0.0403226	7.15481	5.17654	0.000684777	0.126675	0.118816	IRS2/FABP5/SLC2A14/FGF19/KLF15	5
GO:0010464	regulation of mesenchymal cell proliferation	3/107	33/18986	0.0909091	16.1308	6.54921	0.000839577	0.126675	0.118816	IRS2/ZEB1/FOXF1	3
GO:0010827	regulation of D-glucose transmembrane transport	4/107	78/18986	0.0512821	9.09945	5.3962	0.000987376	0.126675	0.118816	IRS2/FABP5/FGF19/KLF15	4
GO:0046323	D-glucose import	4/107	79/18986	0.0506329	8.98427	5.35359	0.00103557	0.126675	0.118816	IRS2/SLC2A14/FGF19/KLF15	4
GO:0018108	peptidyl-tyrosine phosphorylation	6/107	204/18986	0.0294118	5.2188	4.5608	0.00105047	0.126675	0.118816	HBEGF/THBS4/FGR/IL12A/AREG/BMP6	6
GO:0034219	carbohydrate transmembrane transport	5/107	137/18986	0.0364964	6.47589	4.8426	0.00107251	0.126675	0.118816	IRS2/FABP5/SLC2A14/FGF19/KLF15	5
GO:0018212	peptidyl-tyrosine modification	6/107	206/18986	0.0291262	5.16813	4.5283	0.00110459	0.126675	0.118816	HBEGF/THBS4/FGR/IL12A/AREG/BMP6	6
GO:0006869	lipid transport	9/107	459/18986	0.0196078	3.4792	4.04784	0.00115432	0.126675	0.118816	IRS2/FABP5/INHBA/SLCO2B1/BMP6/C1QTNF1/NMUR2/ATP10D/PCSK9	9
GO:0046326	positive regulation of D-glucose import	3/107	37/18986	0.0810811	14.387	6.13617	0.00117627	0.126675	0.118816	IRS2/FGF19/KLF15	3
GO:0008643	carbohydrate transport	5/107	142/18986	0.0352113	6.24786	4.7255	0.00125822	0.126675	0.118816	IRS2/FABP5/SLC2A14/FGF19/KLF15	5
GO:0051051	negative regulation of transport	9/107	467/18986	0.0192719	3.4196	3.98567	0.0013012	0.126675	0.118816	PRKCE/IRS2/FABP5/INHBA/IL12A/FOXF1/CASQ2/TRH/PCSK9	9
GO:0098917	retrograde trans-synaptic signaling	2/107	10/18986	0.2	35.4879	8.21243	0.00137481	0.126675	0.118816	FABP5/TENM2	2
GO:0034763	negative regulation of transmembrane transport	5/107	147/18986	0.0340136	6.03535	4.61389	0.00146671	0.126675	0.118816	PRKCE/IRS2/FABP5/CASQ2/PCSK9	5
GO:0060391	positive regulation of SMAD protein signal transduction	3/107	40/18986	0.075	13.3079	5.8663	0.00147749	0.126675	0.118816	INHBA/BMP6/BMPER	3
GO:1903532	positive regulation of secretion by cell	7/107	298/18986	0.0234899	4.16804	4.14977	0.00149719	0.126675	0.118816	PRKCE/IRS2/INHBA/FGR/BMP6/C1QTNF1/TRH	7
GO:0044060	regulation of endocrine process	3/107	41/18986	0.0731707	12.9834	5.7827	0.00158764	0.1274	0.119496	INHBA/BMP6/C1QTNF1	3
GO:0010565	regulation of cellular ketone metabolic process	5/107	153/18986	0.0326797	5.79867	4.48657	0.00174929	0.1274	0.119496	PRKCE/IRS2/FABP5/FGF19/BMP6	5
GO:0031960	response to corticosteroid	5/107	156/18986	0.0320513	5.68716	4.42542	0.00190466	0.1274	0.119496	INHBA/AREG/SSTR2/CALCR/BMP6	5
GO:0010828	positive regulation of D-glucose transmembrane transport	3/107	44/18986	0.0681818	12.0981	5.54844	0.0019485	0.1274	0.119496	IRS2/FGF19/KLF15	3
GO:2000833	positive regulation of steroid hormone secretion	2/107	12/18986	0.166667	29.5732	7.4538	0.0020016	0.1274	0.119496	BMP6/C1QTNF1	2
GO:0010463	mesenchymal cell proliferation	3/107	45/18986	0.0666667	11.8293	5.47535	0.00207918	0.1274	0.119496	IRS2/ZEB1/FOXF1	3
GO:0021879	forebrain neuron differentiation	3/107	45/18986	0.0666667	11.8293	5.47535	0.00207918	0.1274	0.119496	LHX6/INHBA/OTP	3
GO:0060395	SMAD protein signal transduction	4/107	97/18986	0.0412371	7.31708	4.69576	0.00221033	0.1274	0.119496	INHBA/BMP6/CITED1/BMPER	4
GO:0045601	regulation of endothelial cell differentiation	3/107	46/18986	0.0652174	11.5721	5.40454	0.00221519	0.1274	0.119496	CDH5/ZEB1/BMP6	3
GO:0050730	regulation of peptidyl-tyrosine phosphorylation	5/107	162/18986	0.0308642	5.47652	4.30774	0.00224541	0.1274	0.119496	HBEGF/THBS4/IL12A/AREG/BMP6	5
GO:0042180	cellular ketone metabolic process	6/107	237/18986	0.0253165	4.49213	4.07271	0.00224881	0.1274	0.119496	PRKCE/IRS2/FABP5/INHBA/FGF19/BMP6	6
GO:0001822	kidney development	7/107	322/18986	0.0217391	3.85738	3.89314	0.00231991	0.1274	0.119496	HPGD/BMP6/CITED1/KLF15/PCSK9/CALB1/BMPER	7
GO:0052803	imidazole-containing compound metabolic process	2/107	13/18986	0.153846	27.2983	7.14068	0.00235684	0.1274	0.119496	TRH/UROC1	2
GO:0010634	positive regulation of epithelial cell migration	3/107	48/18986	0.0625	11.09	5.26927	0.00250349	0.13167	0.123501	PRKCE/IRS2/HBEGF	3
GO:1901653	cellular response to peptide	2/107	14/18986	0.142857	25.3485	6.86099	0.00273955	0.136195	0.127745	IRS2/KLF15	2
GO:1902306	negative regulation of sodium ion transmembrane transport	2/107	14/18986	0.142857	25.3485	6.86099	0.00273955	0.136195	0.127745	PRKCE/PCSK9	2
GO:0043114	regulation of vascular permeability	3/107	50/18986	0.06	10.6464	5.14176	0.00281397	0.136195	0.127745	CDH5/NPR1/BMP6	3
GO:0090130	tissue migration	4/107	105/18986	0.0380952	6.75959	4.45535	0.00294662	0.136195	0.127745	PRKCE/IRS2/HBEGF/FOXF1	4
GO:0048660	regulation of smooth muscle cell proliferation	5/107	174/18986	0.0287356	5.09883	4.08907	0.0030572	0.136195	0.127745	HBEGF/HPGD/IL12A/NPR1/OGN	5
GO:0140353	lipid export from cell	3/107	52/18986	0.0576923	10.2369	5.02127	0.00314717	0.136195	0.127745	INHBA/BMP6/C1QTNF1	3
GO:0043252	sodium-independent organic anion transport	2/107	15/18986	0.133333	23.6586	6.60907	0.00314943	0.136195	0.127745	SLCO2B1/SLCO5A1	2
GO:0043278	response to morphine	2/107	15/18986	0.133333	23.6586	6.60907	0.00314943	0.136195	0.127745	PRKCE/ARC	2
GO:0048659	smooth muscle cell proliferation	5/107	178/18986	0.0280899	4.98425	4.02062	0.0033696	0.140098	0.131406	HBEGF/HPGD/IL12A/NPR1/OGN	5
GO:0014072	response to isoquinoline alkaloid	2/107	16/18986	0.125	22.1799	6.38055	0.00358615	0.140098	0.131406	PRKCE/ARC	2
GO:0030728	ovulation	2/107	16/18986	0.125	22.1799	6.38055	0.00358615	0.140098	0.131406	INHBA/HPGD	2
GO:0061101	neuroendocrine cell differentiation	2/107	16/18986	0.125	22.1799	6.38055	0.00358615	0.140098	0.131406	OTP/INSM1	2
GO:0046883	regulation of hormone secretion	6/107	261/18986	0.0229885	4.07906	3.77082	0.00362198	0.140098	0.131406	PRKCE/IRS2/INHBA/BMP6/C1QTNF1/TRH	6
GO:0021872	forebrain generation of neurons	3/107	55/18986	0.0545455	9.6785	4.85229	0.0036907	0.140098	0.131406	LHX6/INHBA/OTP	3
GO:0043434	response to peptide hormone	8/107	446/18986	0.0179372	3.18277	3.51178	0.00374363	0.140098	0.131406	IRS2/INHBA/GLP2R/EGR2/AREG/CITED1/KLF15/PCSK9	8
GO:0032496	response to lipopolysaccharide	7/107	354/18986	0.019774	3.50869	3.58695	0.003915	0.142338	0.133507	PRKCE/HPGD/IL12A/IL10RA/BMP6/CITED1/IL24	7
GO:0048732	gland development	8/107	450/18986	0.0177778	3.15448	3.48215	0.00394978	0.142338	0.133507	IRS2/SOX3/AREG/OTP/FOXF1/INSM1/RCBTB2/PCSK9	8
GO:2000846	regulation of corticosteroid hormone secretion	2/107	17/18986	0.117647	20.8752	6.17194	0.0040494	0.143275	0.134386	BMP6/C1QTNF1	2
GO:0060986	endocrine hormone secretion	3/107	58/18986	0.0517241	9.17789	4.69581	0.00428817	0.149014	0.139769	INHBA/BMP6/C1QTNF1	3
GO:0050708	regulation of protein secretion	6/107	272/18986	0.0220588	3.9141	3.64429	0.00442652	0.149049	0.139801	PRKCE/IRS2/IL12A/BMP6/TRH/SAA1	6
GO:0010766	negative regulation of sodium ion transport	2/107	18/18986	0.111111	19.7155	5.98045	0.00453889	0.149049	0.139801	PRKCE/PCSK9	2
GO:0015711	organic anion transport	8/107	462/18986	0.017316	3.07254	3.39519	0.00462134	0.149049	0.139801	IRS2/FABP5/SLCO2B1/SLC2A14/SLCO5A1/NMUR2/CALHM6/TRH	8
GO:0051897	positive regulation of phosphatidylinositol 3-kinase/protein kinase B signal transduction	5/107	192/18986	0.0260417	4.62081	3.79625	0.00464494	0.149049	0.139801	IRS2/HBEGF/FGR/CALCR/C1QTNF1	5
GO:0046324	regulation of D-glucose import	3/107	60/18986	0.05	8.87196	4.59766	0.0047172	0.149049	0.139801	IRS2/FGF19/KLF15	3
GO:0015908	fatty acid transport	4/107	120/18986	0.0333333	5.91464	4.06584	0.00474872	0.149049	0.139801	IRS2/FABP5/SLCO2B1/NMUR2	4
GO:0060749	mammary gland alveolus development	2/107	19/18986	0.105263	18.6778	5.80382	0.0050543	0.153682	0.144147	AREG/FOXF1	2
GO:0061377	mammary gland lobule development	2/107	19/18986	0.105263	18.6778	5.80382	0.0050543	0.153682	0.144147	AREG/FOXF1	2
GO:0002237	response to molecule of bacterial origin	7/107	375/18986	0.0186667	3.3122	3.40458	0.00534403	0.159992	0.150065	PRKCE/HPGD/IL12A/IL10RA/BMP6/CITED1/IL24	7
GO:0035930	corticosteroid hormone secretion	2/107	20/18986	0.1	17.7439	5.64017	0.00559533	0.162515	0.152432	BMP6/C1QTNF1	2
GO:0097154	GABAergic neuron differentiation	2/107	20/18986	0.1	17.7439	5.64017	0.00559533	0.162515	0.152432	LHX6/INHBA	2
GO:0050728	negative regulation of inflammatory response	5/107	203/18986	0.0246305	4.37042	3.63461	0.00586355	0.167801	0.15739	CDH5/FGR/IL10RA/FOXF1/SAA1	5
GO:0015909	long-chain fatty acid transport	3/107	66/18986	0.0454545	8.06542	4.3287	0.00615624	0.173624	0.162852	IRS2/FABP5/NMUR2	3
GO:0034762	regulation of transmembrane transport	8/107	487/18986	0.0164271	2.91481	3.22273	0.00630048	0.175153	0.164286	PRKCE/IRS2/FABP5/ARC/FGF19/KLF15/CASQ2/PCSK9	8
GO:0050994	regulation of lipid catabolic process	3/107	67/18986	0.0447761	7.94504	4.28717	0.00641874	0.175928	0.165013	PRKCE/IRS2/HPGD	3
GO:0002433	immune response-regulating cell surface receptor signaling pathway involved in phagocytosis	2/107	22/18986	0.0909091	16.1308	5.34585	0.00675306	0.18002	0.168851	PRKCE/FGR	2
GO:0038096	Fc-gamma receptor signaling pathway involved in phagocytosis	2/107	22/18986	0.0909091	16.1308	5.34585	0.00675306	0.18002	0.168851	PRKCE/FGR	2
GO:0010632	regulation of epithelial cell migration	3/107	69/18986	0.0434783	7.71475	4.20665	0.00696354	0.181427	0.170171	PRKCE/IRS2/HBEGF	3
GO:0051384	response to glucocorticoid	4/107	134/18986	0.0298507	5.29669	3.75765	0.00699232	0.181427	0.170171	AREG/SSTR2/CALCR/BMP6	4
GO:0141091	transforming growth factor beta receptor superfamily signaling pathway	7/107	397/18986	0.0176322	3.12865	3.22686	0.00722946	0.181524	0.170262	CDH5/ZEB1/INHBA/HPGD/BMP6/CITED1/BMPER	7
GO:0048662	negative regulation of smooth muscle cell proliferation	3/107	70/18986	0.0428571	7.60454	4.16759	0.00724593	0.181524	0.170262	IL12A/NPR1/OGN	3
GO:0038128	ERBB2 signaling pathway	2/107	23/18986	0.0869565	15.4295	5.21278	0.00736917	0.181524	0.170262	HBEGF/AREG	2
GO:2000831	regulation of steroid hormone secretion	2/107	23/18986	0.0869565	15.4295	5.21278	0.00736917	0.181524	0.170262	BMP6/C1QTNF1	2
GO:0035270	endocrine system development	4/107	138/18986	0.0289855	5.14317	3.67745	0.00774258	0.188338	0.176653	SOX3/BMP6/OTP/INSM1	4
GO:0003323	type B pancreatic cell development	2/107	24/18986	0.0833333	14.7866	5.08778	0.00800972	0.190084	0.178291	BMP6/INSM1	2
GO:0032891	negative regulation of organic acid transport	2/107	24/18986	0.0833333	14.7866	5.08778	0.00800972	0.190084	0.178291	IRS2/TRH	2
GO:0061041	regulation of wound healing	4/107	140/18986	0.0285714	5.06969	3.63851	0.00813681	0.190774	0.178938	PRKCE/HBEGF/C1QTNF1/SERPINC1	4
GO:0002053	positive regulation of mesenchymal cell proliferation	2/107	26/18986	0.0769231	13.6492	4.85889	0.00936297	0.215349	0.201988	IRS2/FOXF1	2
GO:0046879	hormone secretion	6/107	319/18986	0.0188088	3.33742	3.16958	0.00940629	0.215349	0.201988	PRKCE/IRS2/INHBA/BMP6/C1QTNF1/TRH	6
GO:0031016	pancreas development	3/107	79/18986	0.0379747	6.7382	3.84756	0.0100934	0.22583	0.211818	BMP6/FOXF1/INSM1	3
GO:0007178	cell surface receptor protein serine/threonine kinase signaling pathway	7/107	425/18986	0.0164706	2.92253	3.01769	0.0102949	0.22583	0.211818	CDH5/ZEB1/INHBA/HPGD/BMP6/CITED1/BMPER	7
GO:0050714	positive regulation of protein secretion	4/107	150/18986	0.0266667	4.73171	3.45436	0.0103058	0.22583	0.211818	PRKCE/IRS2/BMP6/TRH	4
GO:0090092	regulation of transmembrane receptor protein serine/threonine kinase signaling pathway	6/107	326/18986	0.0184049	3.26575	3.10651	0.0103949	0.22583	0.211818	CDH5/ZEB1/INHBA/BMP6/CITED1/BMPER	6
GO:0060390	regulation of SMAD protein signal transduction	3/107	80/18986	0.0375	6.65397	3.81511	0.0104443	0.22583	0.211818	INHBA/BMP6/BMPER	3
GO:0043304	regulation of mast cell degranulation	2/107	28/18986	0.0714286	12.6742	4.65392	0.0108105	0.228193	0.214035	FGR/FOXF1	2
GO:0050996	positive regulation of lipid catabolic process	2/107	28/18986	0.0714286	12.6742	4.65392	0.0108105	0.228193	0.214035	PRKCE/IRS2	2
GO:0009914	hormone transport	6/107	330/18986	0.0181818	3.22617	3.07124	0.0109919	0.228193	0.214035	PRKCE/IRS2/INHBA/BMP6/C1QTNF1/TRH	6
GO:0072073	kidney epithelium development	4/107	153/18986	0.0261438	4.63893	3.40226	0.0110227	0.228193	0.214035	CITED1/KLF15/CALB1/BMPER	4
GO:1903531	negative regulation of secretion by cell	4/107	154/18986	0.025974	4.60881	3.3852	0.0112686	0.230829	0.216508	INHBA/IL12A/FOXF1/TRH	4
GO:0021854	hypothalamus development	2/107	29/18986	0.0689655	12.2372	4.55911	0.011569	0.234513	0.219963	SOX3/OTP	2
GO:0032368	regulation of lipid transport	4/107	156/18986	0.025641	4.54972	3.3515	0.0117711	0.23615	0.221498	IRS2/BMP6/C1QTNF1/PCSK9	4
GO:0003309	type B pancreatic cell differentiation	2/107	30/18986	0.0666667	11.8293	4.46884	0.0123502	0.242762	0.2277	BMP6/INSM1	2
GO:0120255	olefinic compound biosynthetic process	2/107	30/18986	0.0666667	11.8293	4.46884	0.0123502	0.242762	0.2277	INHBA/BMP6	2
GO:0002431	Fc receptor mediated stimulatory signaling pathway	2/107	31/18986	0.0645161	11.4477	4.38275	0.0131538	0.255743	0.239876	PRKCE/FGR	2
GO:0019216	regulation of lipid metabolic process	6/107	344/18986	0.0174419	3.09487	2.95187	0.0132734	0.255743	0.239876	PRKCE/IRS2/FABP5/HPGD/FGF19/BMP6	6
GO:0032024	positive regulation of insulin secretion	3/107	88/18986	0.0340909	6.04907	3.57398	0.0135066	0.257685	0.241698	PRKCE/IRS2/TRH	3
GO:0062012	regulation of small molecule metabolic process	6/107	348/18986	0.0172414	3.0593	2.91888	0.013982	0.263408	0.247066	PRKCE/IRS2/FABP5/FGF19/BMP6/C1QTNF1	6
GO:0033002	muscle cell proliferation	5/107	252/18986	0.0198413	3.52062	3.0325	0.0140773	0.263408	0.247066	HBEGF/HPGD/IL12A/NPR1/OGN	5
GO:0008543	fibroblast growth factor receptor signaling pathway	3/107	90/18986	0.0333333	5.91464	3.51832	0.0143437	0.265836	0.249343	FLRT3/FLRT1/FGF19	3
GO:0001934	positive regulation of protein phosphorylation	7/107	455/18986	0.0153846	2.72983	2.8117	0.0145338	0.266819	0.250264	HBEGF/THBS4/IL12A/AREG/FGF19/BMP6/TNFSF15	7
GO:1901617	organic hydroxy compound biosynthetic process	5/107	255/18986	0.0196078	3.4792	3.00061	0.0147477	0.268215	0.251574	INHBA/FGF19/BMP6/CITED1/INSM1	5
GO:0002703	regulation of leukocyte mediated immunity	5/107	258/18986	0.0193798	3.43875	2.96919	0.0154392	0.278192	0.260932	FGR/IL12A/FOXF1/CALHM6/CR2	5
GO:0050886	endocrine process	3/107	93/18986	0.0322581	5.72385	3.43791	0.0156534	0.279464	0.262125	INHBA/BMP6/C1QTNF1	3
GO:0038094	Fc-gamma receptor signaling pathway	2/107	35/18986	0.0571429	10.1394	4.0742	0.0165875	0.290805	0.272762	PRKCE/FGR	2
GO:0048333	mesodermal cell differentiation	2/107	35/18986	0.0571429	10.1394	4.0742	0.0165875	0.290805	0.272762	INHBA/FOXF1	2
GO:0051048	negative regulation of secretion	4/107	175/18986	0.0228571	4.05575	3.05731	0.0172707	0.291082	0.273023	INHBA/IL12A/FOXF1/TRH	4
GO:0002068	glandular epithelial cell development	2/107	36/18986	0.0555556	9.85774	4.00477	0.0174994	0.291082	0.273023	BMP6/INSM1	2
GO:0019934	cGMP-mediated signaling	2/107	36/18986	0.0555556	9.85774	4.00477	0.0174994	0.291082	0.273023	NPR1/IRAG1	2
GO:0010631	epithelial cell migration	3/107	97/18986	0.0309278	5.48781	3.33598	0.0175014	0.291082	0.273023	PRKCE/IRS2/HBEGF	3
GO:1904063	negative regulation of cation transmembrane transport	3/107	97/18986	0.0309278	5.48781	3.33598	0.0175014	0.291082	0.273023	PRKCE/CASQ2/PCSK9	3
GO:0002275	myeloid cell activation involved in immune response	3/107	98/18986	0.0306122	5.43181	3.31138	0.0179816	0.291082	0.273023	PRKCE/FGR/FOXF1	3
GO:0035883	enteroendocrine cell differentiation	2/107	37/18986	0.0540541	9.59131	3.93799	0.0184322	0.291082	0.273023	BMP6/INSM1	2
GO:0048265	response to pain	2/107	37/18986	0.0540541	9.59131	3.93799	0.0184322	0.291082	0.273023	THBS4/NMUR2	2
GO:0006576	biogenic amine metabolic process	3/107	99/18986	0.030303	5.37695	3.28712	0.0184692	0.291082	0.273023	NPR1/INSM1/TRH	3
GO:0009306	protein secretion	6/107	371/18986	0.0161725	2.86964	2.73792	0.0185766	0.291082	0.273023	PRKCE/IRS2/IL12A/BMP6/TRH/SAA1	6
GO:0015718	monocarboxylic acid transport	4/107	179/18986	0.0223464	3.96512	3.00066	0.0186017	0.291082	0.273023	IRS2/FABP5/SLCO2B1/NMUR2	4
GO:0042327	positive regulation of phosphorylation	7/107	479/18986	0.0146138	2.59306	2.65851	0.0187295	0.291082	0.273023	HBEGF/THBS4/IL12A/AREG/FGF19/BMP6/TNFSF15	7
GO:0001657	ureteric bud development	3/107	100/18986	0.03	5.32318	3.26318	0.018964	0.291082	0.273023	CITED1/CALB1/BMPER	3
GO:0090132	epithelium migration	3/107	100/18986	0.03	5.32318	3.26318	0.018964	0.291082	0.273023	PRKCE/IRS2/HBEGF	3
GO:0035592	establishment of protein localization to extracellular region	6/107	374/18986	0.0160428	2.84662	2.71534	0.0192438	0.291082	0.273023	PRKCE/IRS2/IL12A/BMP6/TRH/SAA1	6
GO:1903034	regulation of response to wounding	4/107	181/18986	0.0220994	3.92131	2.97295	0.0192905	0.291082	0.273023	PRKCE/HBEGF/C1QTNF1/SERPINC1	4
GO:0050673	epithelial cell proliferation	7/107	482/18986	0.0145228	2.57692	2.64002	0.0193081	0.291082	0.273023	IRS2/ZEB1/THBS4/IL12A/AREG/BMP6/BMPER	7
GO:0072163	mesonephric epithelium development	3/107	101/18986	0.029703	5.27047	3.23956	0.0194662	0.291082	0.273023	CITED1/CALB1/BMPER	3
GO:0072164	mesonephric tubule development	3/107	101/18986	0.029703	5.27047	3.23956	0.0194662	0.291082	0.273023	CITED1/CALB1/BMPER	3
GO:0003018	vascular process in circulatory system	5/107	276/18986	0.0181159	3.21448	2.78995	0.020047	0.291082	0.273023	FABP5/CDH5/SLCO2B1/NPR1/BMP6	5
GO:0032868	response to insulin	5/107	276/18986	0.0181159	3.21448	2.78995	0.020047	0.291082	0.273023	IRS2/EGR2/CITED1/KLF15/PCSK9	5
GO:0007616	long-term memory	2/107	39/18986	0.0512821	9.09945	3.81176	0.0203592	0.291082	0.273023	ARC/CALB1	2
GO:0042755	eating behavior	2/107	39/18986	0.0512821	9.09945	3.81176	0.0203592	0.291082	0.273023	NMUR2/TRH	2
GO:0070670	response to interleukin-4	2/107	39/18986	0.0512821	9.09945	3.81176	0.0203592	0.291082	0.273023	CITED1/IL24	2
GO:0034766	negative regulation of monoatomic ion transmembrane transport	3/107	103/18986	0.0291262	5.16813	3.19325	0.0204924	0.291082	0.273023	PRKCE/CASQ2/PCSK9	3
GO:0043279	response to alkaloid	3/107	103/18986	0.0291262	5.16813	3.19325	0.0204924	0.291082	0.273023	PRKCE/ARC/CASQ2	3
GO:0071692	protein localization to extracellular region	6/107	382/18986	0.0157068	2.787	2.65621	0.021103	0.296534	0.278136	PRKCE/IRS2/IL12A/BMP6/TRH/SAA1	6
GO:0051896	regulation of phosphatidylinositol 3-kinase/protein kinase B signal transduction	5/107	280/18986	0.0178571	3.16856	2.75212	0.021181	0.296534	0.278136	IRS2/HBEGF/FGR/CALCR/C1QTNF1	5
GO:0032814	regulation of natural killer cell activation	2/107	40/18986	0.05	8.87196	3.75199	0.021353	0.296807	0.278392	FGR/IL12A	2
GO:0001823	mesonephros development	3/107	105/18986	0.0285714	5.06969	3.14812	0.021548	0.297394	0.278942	CITED1/CALB1/BMPER	3
GO:1905952	regulation of lipid localization	4/107	188/18986	0.0212766	3.7753	2.879	0.021825	0.299094	0.280537	IRS2/BMP6/C1QTNF1/PCSK9	4
GO:0021983	pituitary gland development	2/107	42/18986	0.047619	8.44949	3.6385	0.0233998	0.318434	0.298677	SOX3/OTP	2
GO:0070374	positive regulation of ERK1 and ERK2 cascade	4/107	197/18986	0.0203046	3.60283	2.76461	0.0253706	0.342549	0.321296	INHBA/CALCR/FGF19/BMPER	4
GO:0060563	neuroepithelial cell differentiation	2/107	44/18986	0.0454545	8.06542	3.53231	0.0255239	0.342549	0.321296	OTP/INSM1	2
GO:0070372	regulation of ERK1 and ERK2 cascade	5/107	296/18986	0.0168919	2.99728	2.60729	0.0261339	0.347763	0.326186	DUSP6/INHBA/CALCR/FGF19/BMPER	5
GO:0031348	negative regulation of defense response	5/107	297/18986	0.016835	2.98719	2.59856	0.026466	0.347763	0.326186	CDH5/FGR/IL10RA/FOXF1/SAA1	5
GO:0090277	positive regulation of peptide hormone secretion	3/107	114/18986	0.0263158	4.66945	2.95837	0.0266613	0.347763	0.326186	PRKCE/IRS2/TRH	3
GO:0050678	regulation of epithelial cell proliferation	6/107	406/18986	0.0147783	2.62225	2.48752	0.0274039	0.347763	0.326186	IRS2/ZEB1/THBS4/IL12A/AREG/BMP6	6
GO:0001935	endothelial cell proliferation	4/107	202/18986	0.019802	3.51365	2.70392	0.027482	0.347763	0.326186	THBS4/IL12A/BMP6/BMPER	4
GO:0048839	inner ear development	4/107	202/18986	0.019802	3.51365	2.70392	0.027482	0.347763	0.326186	ZEB1/CLRN1/CALB1/BMPER	4
GO:0031018	endocrine pancreas development	2/107	46/18986	0.0434783	7.71475	3.43263	0.0277235	0.347763	0.326186	BMP6/INSM1	2
GO:0043300	regulation of leukocyte degranulation	2/107	46/18986	0.0434783	7.71475	3.43263	0.0277235	0.347763	0.326186	FGR/FOXF1	2
GO:0048483	autonomic nervous system development	2/107	46/18986	0.0434783	7.71475	3.43263	0.0277235	0.347763	0.326186	EGR2/INSM1	2
GO:0002793	positive regulation of peptide secretion	3/107	116/18986	0.0258621	4.58895	2.91889	0.0278782	0.347763	0.326186	PRKCE/IRS2/TRH	3
GO:0060840	artery development	3/107	116/18986	0.0258621	4.58895	2.91889	0.0278782	0.347763	0.326186	EGR2/HPGD/FOXF1	3
GO:0018958	phenol-containing compound metabolic process	3/107	117/18986	0.025641	4.54972	2.89948	0.0284976	0.353225	0.33131	NPR1/CITED1/INSM1	3
GO:1900271	regulation of long-term synaptic potentiation	2/107	47/18986	0.0425532	7.55061	3.38501	0.0288509	0.35534	0.333294	ARC/CALB1	2
GO:0010837	regulation of keratinocyte proliferation	2/107	48/18986	0.0416667	7.3933	3.33877	0.0299964	0.36293	0.340412	ZEB1/AREG	2
GO:0046189	phenol-containing compound biosynthetic process	2/107	48/18986	0.0416667	7.3933	3.33877	0.0299964	0.36293	0.340412	CITED1/INSM1	2
GO:0030900	forebrain development	6/107	416/18986	0.0144231	2.55922	2.42078	0.0303623	0.36293	0.340412	LHX6/ZEB1/INHBA/SOX3/SSTR2/OTP	6
GO:0032355	response to estradiol	3/107	120/18986	0.025	4.43598	2.84256	0.0303996	0.36293	0.340412	HPGD/AREG/SSTR2	3
GO:0044344	cellular response to fibroblast growth factor stimulus	3/107	120/18986	0.025	4.43598	2.84256	0.0303996	0.36293	0.340412	FLRT3/FLRT1/FGF19	3
GO:0009308	amine metabolic process	3/107	121/18986	0.0247934	4.39932	2.824	0.0310481	0.365283	0.34262	NPR1/INSM1/TRH	3
GO:0006693	prostaglandin metabolic process	2/107	49/18986	0.0408163	7.24242	3.29384	0.0311598	0.365283	0.34262	FABP5/HPGD	2
GO:0032369	negative regulation of lipid transport	2/107	49/18986	0.0408163	7.24242	3.29384	0.0311598	0.365283	0.34262	IRS2/PCSK9	2
GO:0006692	prostanoid metabolic process	2/107	50/18986	0.04	7.09757	3.25016	0.0323409	0.36834	0.345487	FABP5/HPGD	2
GO:0042181	ketone biosynthetic process	2/107	50/18986	0.04	7.09757	3.25016	0.0323409	0.36834	0.345487	INHBA/BMP6	2
GO:0044331	cell-cell adhesion mediated by cadherin	2/107	50/18986	0.04	7.09757	3.25016	0.0323409	0.36834	0.345487	CDH5/BMP6	2
GO:0090102	cochlea development	2/107	50/18986	0.04	7.09757	3.25016	0.0323409	0.36834	0.345487	ZEB1/CALB1	2
GO:0072009	nephron epithelium development	3/107	123/18986	0.0243902	4.32779	2.78747	0.032367	0.36834	0.345487	CITED1/KLF15/CALB1	3
GO:0043491	phosphatidylinositol 3-kinase/protein kinase B signal transduction	5/107	317/18986	0.0157729	2.79873	2.43132	0.0336829	0.375275	0.351992	IRS2/HBEGF/FGR/CALCR/C1QTNF1	5
GO:0030278	regulation of ossification	3/107	125/18986	0.024	4.25854	2.75172	0.0337148	0.375275	0.351992	EGR2/CALCR/BMP6	3
GO:0045446	endothelial cell differentiation	3/107	125/18986	0.024	4.25854	2.75172	0.0337148	0.375275	0.351992	CDH5/ZEB1/BMP6	3
GO:0034764	positive regulation of transmembrane transport	4/107	216/18986	0.0185185	3.28591	2.54368	0.0339406	0.375275	0.351992	IRS2/ARC/FGF19/KLF15	4
GO:0050679	positive regulation of epithelial cell proliferation	4/107	216/18986	0.0185185	3.28591	2.54368	0.0339406	0.375275	0.351992	IRS2/THBS4/AREG/BMP6	4
GO:0010811	positive regulation of cell-substrate adhesion	3/107	126/18986	0.0238095	4.22474	2.73412	0.0343996	0.376798	0.35342	PRKCE/FOXF1/EGFLAM	3
GO:0070371	ERK1 and ERK2 cascade	5/107	319/18986	0.015674	2.78118	2.41531	0.0344656	0.376798	0.35342	DUSP6/INHBA/CALCR/FGF19/BMPER	5
GO:0071774	response to fibroblast growth factor	3/107	128/18986	0.0234375	4.15873	2.69947	0.0357907	0.379743	0.356182	FLRT3/FLRT1/FGF19	3
GO:0043303	mast cell degranulation	2/107	53/18986	0.0377358	6.69582	3.12602	0.0359878	0.379743	0.356182	FGR/FOXF1	2
GO:0045471	response to ethanol	3/107	129/18986	0.0232558	4.12649	2.6824	0.0364971	0.379743	0.356182	PRKCE/ARC/HPGD	3
GO:0002066	columnar/cuboidal epithelial cell development	2/107	54/18986	0.037037	6.57182	3.08677	0.0372371	0.379743	0.356182	BMP6/INSM1	2
GO:1902305	regulation of sodium ion transmembrane transport	2/107	54/18986	0.037037	6.57182	3.08677	0.0372371	0.379743	0.356182	PRKCE/PCSK9	2
GO:0032102	negative regulation of response to external stimulus	6/107	437/18986	0.01373	2.43624	2.28673	0.0372411	0.379743	0.356182	CDH5/FGR/IL10RA/C1QTNF1/FOXF1/SAA1	6
GO:0042886	amide transport	5/107	328/18986	0.0152439	2.70487	2.34478	0.0381278	0.379743	0.356182	PRKCE/IRS2/SLC14A2/CLEC4M/TRH	5
GO:0002043	blood vessel endothelial cell proliferation involved in sprouting angiogenesis	2/107	55/18986	0.0363636	6.45234	3.04849	0.038503	0.379743	0.356182	IL12A/BMPER	2
GO:0002715	regulation of natural killer cell mediated immunity	2/107	55/18986	0.0363636	6.45234	3.04849	0.038503	0.379743	0.356182	IL12A/CALHM6	2
GO:0050885	neuromuscular process controlling balance	2/107	55/18986	0.0363636	6.45234	3.04849	0.038503	0.379743	0.356182	CLRN1/FOXS1	2
GO:0002065	columnar/cuboidal epithelial cell differentiation	3/107	132/18986	0.0227273	4.03271	2.63223	0.038659	0.379743	0.356182	BMP6/OTP/INSM1	3
GO:0045834	positive regulation of lipid metabolic process	3/107	132/18986	0.0227273	4.03271	2.63223	0.038659	0.379743	0.356182	PRKCE/IRS2/BMP6	3
GO:0042060	wound healing	6/107	444/18986	0.0135135	2.39783	2.24375	0.0397394	0.379743	0.356182	PRKCE/HBEGF/C1QTNF1/SPRR3/SAA1/SERPINC1	6
GO:0002279	mast cell activation involved in immune response	2/107	56/18986	0.0357143	6.33712	3.01115	0.0397852	0.379743	0.356182	FGR/FOXF1	2
GO:0002448	mast cell mediated immunity	2/107	56/18986	0.0357143	6.33712	3.01115	0.0397852	0.379743	0.356182	FGR/FOXF1	2
GO:0043271	negative regulation of monoatomic ion transport	3/107	134/18986	0.0223881	3.97252	2.5996	0.040136	0.379743	0.356182	PRKCE/CASQ2/PCSK9	3
GO:0051223	regulation of protein transport	6/107	446/18986	0.0134529	2.38708	2.23162	0.0404724	0.379743	0.356182	PRKCE/IRS2/IL12A/BMP6/TRH/SAA1	6
GO:0043583	ear development	4/107	229/18986	0.0174672	3.09938	2.40621	0.0406671	0.379743	0.356182	ZEB1/CLRN1/CALB1/BMPER	4
GO:0002886	regulation of myeloid leukocyte mediated immunity	2/107	57/18986	0.0350877	6.22594	2.97472	0.0410835	0.379743	0.356182	FGR/FOXF1	2
GO:0006584	catecholamine metabolic process	2/107	57/18986	0.0350877	6.22594	2.97472	0.0410835	0.379743	0.356182	NPR1/INSM1	2
GO:0009712	catechol-containing compound metabolic process	2/107	57/18986	0.0350877	6.22594	2.97472	0.0410835	0.379743	0.356182	NPR1/INSM1	2
GO:0030879	mammary gland development	3/107	136/18986	0.0220588	3.9141	2.56759	0.0416413	0.379743	0.356182	IRS2/AREG/FOXF1	3
GO:0031663	lipopolysaccharide-mediated signaling pathway	2/107	58/18986	0.0344828	6.11859	2.93914	0.0423976	0.379743	0.356182	PRKCE/BMP6	2
GO:0034332	adherens junction organization	2/107	58/18986	0.0344828	6.11859	2.93914	0.0423976	0.379743	0.356182	CDH5/BMP6	2
GO:2001238	positive regulation of extrinsic apoptotic signaling pathway	2/107	58/18986	0.0344828	6.11859	2.93914	0.0423976	0.379743	0.356182	INHBA/TNFSF15	2
GO:0048545	response to steroid hormone	5/107	340/18986	0.0147059	2.6094	2.25434	0.0433699	0.379743	0.356182	INHBA/AREG/SSTR2/CALCR/BMP6	5
GO:0019748	secondary metabolic process	2/107	59/18986	0.0338983	6.01489	2.90439	0.0437274	0.379743	0.356182	PRKCE/CITED1	2
GO:0038093	Fc receptor signaling pathway	2/107	59/18986	0.0338983	6.01489	2.90439	0.0437274	0.379743	0.356182	PRKCE/FGR	2
GO:0050850	positive regulation of calcium-mediated signaling	2/107	59/18986	0.0338983	6.01489	2.90439	0.0437274	0.379743	0.356182	CALCR/NMUR2	2
GO:0030183	B cell differentiation	3/107	139/18986	0.0215827	3.82962	2.52071	0.043952	0.379743	0.356182	INHBA/CMTM7/CR2	3
GO:0001503	ossification	6/107	456/18986	0.0131579	2.33473	2.17193	0.0442663	0.379743	0.356182	EGR2/FGR/AREG/CALCR/BMP6/CITED1	6
GO:0043616	keratinocyte proliferation	2/107	60/18986	0.0333333	5.91464	2.87042	0.0450726	0.379743	0.356182	ZEB1/AREG	2
GO:0048168	regulation of neuronal synaptic plasticity	2/107	60/18986	0.0333333	5.91464	2.87042	0.0450726	0.379743	0.356182	ARC/EGR2	2
GO:0001667	ameboidal-type cell migration	4/107	241/18986	0.0165975	2.94505	2.28773	0.0475032	0.379743	0.356182	PRKCE/IRS2/HBEGF/ARHGDIB	4
GO:0002011	morphogenesis of an epithelial sheet	2/107	64/18986	0.03125	5.54498	2.74186	0.0506033	0.379743	0.356182	FLRT3/HBEGF	2
GO:0071715	icosanoid transport	2/107	64/18986	0.03125	5.54498	2.74186	0.0506033	0.379743	0.356182	SLCO2B1/NMUR2	2
GO:2000179	positive regulation of neural precursor cell proliferation	2/107	64/18986	0.03125	5.54498	2.74186	0.0506033	0.379743	0.356182	OTP/INSM1	2
GO:0006935	chemotaxis	6/107	472/18986	0.0127119	2.25558	2.07957	0.0507887	0.379743	0.356182	FLRT3/HBEGF/THBS4/IL12A/CMTM7/SAA1	6
GO:0043410	positive regulation of MAPK cascade	6/107	472/18986	0.0127119	2.25558	2.07957	0.0507887	0.379743	0.356182	PRKCE/INHBA/CALCR/FGF19/C1QTNF1/BMPER	6
GO:0003158	endothelium development	3/107	148/18986	0.0202703	3.59674	2.38754	0.0512599	0.379743	0.356182	CDH5/ZEB1/BMP6	3
GO:0046942	carboxylic acid transport	5/107	357/18986	0.0140056	2.48514	2.13263	0.0515074	0.379743	0.356182	IRS2/FABP5/SLCO2B1/NMUR2/TRH	5
GO:0042330	taxis	6/107	474/18986	0.0126582	2.24607	2.06829	0.0516435	0.379743	0.356182	FLRT3/HBEGF/THBS4/IL12A/CMTM7/SAA1	6
GO:0015849	organic acid transport	5/107	358/18986	0.0139665	2.4782	2.12569	0.0520122	0.379743	0.356182	IRS2/FABP5/SLCO2B1/NMUR2/TRH	5
GO:0051965	positive regulation of synapse assembly	2/107	65/18986	0.0307692	5.45967	2.71141	0.0520224	0.379743	0.356182	SYNDIG1/FLRT3	2
GO:0007389	pattern specification process	6/107	476/18986	0.012605	2.23663	2.05706	0.0525071	0.379743	0.356182	ZEB1/ARC/EGR2/DZIP1L/BHLHE41/FOXF1	6
GO:0014074	response to purine-containing compound	3/107	150/18986	0.02	3.54879	2.35935	0.0529592	0.379743	0.356182	AREG/CITED1/CASQ2	3
GO:0007179	transforming growth factor beta receptor signaling pathway	4/107	250/18986	0.016	2.83903	2.20357	0.0530246	0.379743	0.356182	CDH5/ZEB1/HPGD/CITED1	4
GO:0045765	regulation of angiogenesis	5/107	360/18986	0.0138889	2.46443	2.11188	0.0530305	0.379743	0.356182	CDH5/THBS4/NPR1/ADAM12/BMPER	5
GO:0090303	positive regulation of wound healing	2/107	66/18986	0.030303	5.37695	2.68158	0.0534557	0.379743	0.356182	PRKCE/HBEGF	2
GO:0002370	natural killer cell cytokine production	1/107	10/18986	0.1	17.7439	3.98715	0.054962	0.379743	0.356182	CALHM6	1
GO:0002420	natural killer cell mediated cytotoxicity directed against tumor cell target	1/107	10/18986	0.1	17.7439	3.98715	0.054962	0.379743	0.356182	IL12A	1
GO:0002727	regulation of natural killer cell cytokine production	1/107	10/18986	0.1	17.7439	3.98715	0.054962	0.379743	0.356182	CALHM6	1
GO:0002855	regulation of natural killer cell mediated immune response to tumor cell	1/107	10/18986	0.1	17.7439	3.98715	0.054962	0.379743	0.356182	IL12A	1
GO:0003310	pancreatic A cell differentiation	1/107	10/18986	0.1	17.7439	3.98715	0.054962	0.379743	0.356182	INSM1	1
GO:0007440	foregut morphogenesis	1/107	10/18986	0.1	17.7439	3.98715	0.054962	0.379743	0.356182	FOXF1	1
GO:0010496	intercellular transport	1/107	10/18986	0.1	17.7439	3.98715	0.054962	0.379743	0.356182	ARC	1
GO:0015911	long-chain fatty acid import across plasma membrane	1/107	10/18986	0.1	17.7439	3.98715	0.054962	0.379743	0.356182	IRS2	1
GO:0031666	positive regulation of lipopolysaccharide-mediated signaling pathway	1/107	10/18986	0.1	17.7439	3.98715	0.054962	0.379743	0.356182	BMP6	1
GO:0032815	negative regulation of natural killer cell activation	1/107	10/18986	0.1	17.7439	3.98715	0.054962	0.379743	0.356182	FGR	1
GO:0044650	adhesion of symbiont to host cell	1/107	10/18986	0.1	17.7439	3.98715	0.054962	0.379743	0.356182	CLEC4M	1
GO:0045136	development of secondary sexual characteristics	1/107	10/18986	0.1	17.7439	3.98715	0.054962	0.379743	0.356182	AREG	1
GO:0051409	response to nitrosative stress	1/107	10/18986	0.1	17.7439	3.98715	0.054962	0.379743	0.356182	DUSP6	1
GO:0060872	semicircular canal development	1/107	10/18986	0.1	17.7439	3.98715	0.054962	0.379743	0.356182	ZEB1	1
GO:0071372	cellular response to follicle-stimulating hormone stimulus	1/107	10/18986	0.1	17.7439	3.98715	0.054962	0.379743	0.356182	INHBA	1
GO:0072205	metanephric collecting duct development	1/107	10/18986	0.1	17.7439	3.98715	0.054962	0.379743	0.356182	CALB1	1
GO:0099566	regulation of postsynaptic cytosolic calcium ion concentration	1/107	10/18986	0.1	17.7439	3.98715	0.054962	0.379743	0.356182	CALB1	1
GO:1902460	regulation of mesenchymal stem cell proliferation	1/107	10/18986	0.1	17.7439	3.98715	0.054962	0.379743	0.356182	CITED1	1
GO:1904669	ATP export	1/107	10/18986	0.1	17.7439	3.98715	0.054962	0.379743	0.356182	CALHM6	1
GO:2000048	negative regulation of cell-cell adhesion mediated by cadherin	1/107	10/18986	0.1	17.7439	3.98715	0.054962	0.379743	0.356182	BMP6	1
GO:2000508	regulation of dendritic cell chemotaxis	1/107	10/18986	0.1	17.7439	3.98715	0.054962	0.379743	0.356182	IL12A	1
GO:2000756	regulation of peptidyl-lysine acetylation	1/107	10/18986	0.1	17.7439	3.98715	0.054962	0.379743	0.356182	KLF15	1
GO:2001241	positive regulation of extrinsic apoptotic signaling pathway in absence of ligand	1/107	10/18986	0.1	17.7439	3.98715	0.054962	0.379743	0.356182	INHBA	1
GO:0062013	positive regulation of small molecule metabolic process	3/107	153/18986	0.0196078	3.4792	2.31796	0.0555589	0.379743	0.356182	PRKCE/IRS2/BMP6	3
GO:0045668	negative regulation of osteoblast differentiation	2/107	68/18986	0.0294118	5.2188	2.6237	0.0563641	0.379743	0.356182	AREG/CITED1	2
GO:1905953	negative regulation of lipid localization	2/107	68/18986	0.0294118	5.2188	2.6237	0.0563641	0.379743	0.356182	IRS2/PCSK9	2
GO:0051222	positive regulation of protein transport	4/107	257/18986	0.0155642	2.7617	2.14067	0.0575513	0.379743	0.356182	PRKCE/IRS2/BMP6/TRH	4
GO:1901342	regulation of vasculature development	5/107	369/18986	0.0135501	2.40433	2.05085	0.057757	0.379743	0.356182	CDH5/THBS4/NPR1/ADAM12/BMPER	5
GO:0030193	regulation of blood coagulation	2/107	69/18986	0.0289855	5.14317	2.5956	0.0578387	0.379743	0.356182	C1QTNF1/SERPINC1	2
GO:0045576	mast cell activation	2/107	69/18986	0.0289855	5.14317	2.5956	0.0578387	0.379743	0.356182	FGR/FOXF1	2
GO:0061180	mammary gland epithelium development	2/107	69/18986	0.0289855	5.14317	2.5956	0.0578387	0.379743	0.356182	AREG/FOXF1	2
GO:0045667	regulation of osteoblast differentiation	3/107	156/18986	0.0192308	3.41229	2.27759	0.0582186	0.379743	0.356182	AREG/BMP6/CITED1	3
GO:0032413	negative regulation of ion transmembrane transporter activity	2/107	70/18986	0.0285714	5.06969	2.56805	0.0593268	0.379743	0.356182	CASQ2/PCSK9	2
GO:0048754	branching morphogenesis of an epithelial tube	3/107	158/18986	0.0189873	3.3691	2.25122	0.0600248	0.379743	0.356182	AREG/CITED1/FOXF1	3
GO:0023061	signal release	6/107	493/18986	0.0121704	2.1595	1.96381	0.0602053	0.379743	0.356182	PRKCE/IRS2/INHBA/BMP6/C1QTNF1/TRH	6
GO:0002423	natural killer cell mediated immune response to tumor cell	1/107	11/18986	0.0909091	16.1308	3.77899	0.0602908	0.379743	0.356182	IL12A	1
GO:0002887	negative regulation of myeloid leukocyte mediated immunity	1/107	11/18986	0.0909091	16.1308	3.77899	0.0602908	0.379743	0.356182	FOXF1	1
GO:0002924	negative regulation of humoral immune response mediated by circulating immunoglobulin	1/107	11/18986	0.0909091	16.1308	3.77899	0.0602908	0.379743	0.356182	CR2	1
GO:0003357	noradrenergic neuron differentiation	1/107	11/18986	0.0909091	16.1308	3.77899	0.0602908	0.379743	0.356182	INSM1	1
GO:0006182	cGMP biosynthetic process	1/107	11/18986	0.0909091	16.1308	3.77899	0.0602908	0.379743	0.356182	NPR1	1
GO:0006751	glutathione catabolic process	1/107	11/18986	0.0909091	16.1308	3.77899	0.0602908	0.379743	0.356182	CHAC2	1
GO:0007168	receptor guanylyl cyclase signaling pathway	1/107	11/18986	0.0909091	16.1308	3.77899	0.0602908	0.379743	0.356182	NPR1	1
GO:0007614	short-term memory	1/107	11/18986	0.0909091	16.1308	3.77899	0.0602908	0.379743	0.356182	CALB1	1
GO:0019065	receptor-mediated endocytosis of virus by host cell	1/107	11/18986	0.0909091	16.1308	3.77899	0.0602908	0.379743	0.356182	CLEC4M	1
GO:0019372	lipoxygenase pathway	1/107	11/18986	0.0909091	16.1308	3.77899	0.0602908	0.379743	0.356182	HPGD	1
GO:0021561	facial nerve development	1/107	11/18986	0.0909091	16.1308	3.77899	0.0602908	0.379743	0.356182	EGR2	1
GO:0021604	cranial nerve structural organization	1/107	11/18986	0.0909091	16.1308	3.77899	0.0602908	0.379743	0.356182	EGR2	1
GO:0021610	facial nerve morphogenesis	1/107	11/18986	0.0909091	16.1308	3.77899	0.0602908	0.379743	0.356182	EGR2	1
GO:0021892	cerebral cortex GABAergic interneuron differentiation	1/107	11/18986	0.0909091	16.1308	3.77899	0.0602908	0.379743	0.356182	LHX6	1
GO:0032000	positive regulation of fatty acid beta-oxidation	1/107	11/18986	0.0909091	16.1308	3.77899	0.0602908	0.379743	0.356182	IRS2	1
GO:0032342	aldosterone biosynthetic process	1/107	11/18986	0.0909091	16.1308	3.77899	0.0602908	0.379743	0.356182	BMP6	1
GO:0033504	floor plate development	1/107	11/18986	0.0909091	16.1308	3.77899	0.0602908	0.379743	0.356182	DZIP1L	1
GO:0038130	ERBB4 signaling pathway	1/107	11/18986	0.0909091	16.1308	3.77899	0.0602908	0.379743	0.356182	HBEGF	1
GO:0042118	endothelial cell activation	1/107	11/18986	0.0909091	16.1308	3.77899	0.0602908	0.379743	0.356182	BMPER	1
GO:0042167	heme catabolic process	1/107	11/18986	0.0909091	16.1308	3.77899	0.0602908	0.379743	0.356182	SLCO2B1	1
GO:0044062	regulation of excretion	1/107	11/18986	0.0909091	16.1308	3.77899	0.0602908	0.379743	0.356182	NPR1	1
GO:0045602	negative regulation of endothelial cell differentiation	1/107	11/18986	0.0909091	16.1308	3.77899	0.0602908	0.379743	0.356182	ZEB1	1
GO:0046149	pigment catabolic process	1/107	11/18986	0.0909091	16.1308	3.77899	0.0602908	0.379743	0.356182	SLCO2B1	1
GO:0070669	response to interleukin-2	1/107	11/18986	0.0909091	16.1308	3.77899	0.0602908	0.379743	0.356182	CITED1	1
GO:0071313	cellular response to caffeine	1/107	11/18986	0.0909091	16.1308	3.77899	0.0602908	0.379743	0.356182	CASQ2	1
GO:0071349	cellular response to interleukin-12	1/107	11/18986	0.0909091	16.1308	3.77899	0.0602908	0.379743	0.356182	IL12A	1
GO:0071918	urea transmembrane transport	1/107	11/18986	0.0909091	16.1308	3.77899	0.0602908	0.379743	0.356182	SLC14A2	1
GO:0075733	intracellular transport of virus	1/107	11/18986	0.0909091	16.1308	3.77899	0.0602908	0.379743	0.356182	CLEC4M	1
GO:0090331	negative regulation of platelet aggregation	1/107	11/18986	0.0909091	16.1308	3.77899	0.0602908	0.379743	0.356182	C1QTNF1	1
GO:0097168	mesenchymal stem cell proliferation	1/107	11/18986	0.0909091	16.1308	3.77899	0.0602908	0.379743	0.356182	CITED1	1
GO:2000650	negative regulation of sodium ion transmembrane transporter activity	1/107	11/18986	0.0909091	16.1308	3.77899	0.0602908	0.379743	0.356182	PCSK9	1
GO:0002704	negative regulation of leukocyte mediated immunity	2/107	71/18986	0.028169	4.99829	2.54102	0.060828	0.379743	0.356182	FOXF1/CR2	2
GO:0043627	response to estrogen	2/107	71/18986	0.028169	4.99829	2.54102	0.060828	0.379743	0.356182	CITED4/CITED1	2
GO:1900046	regulation of hemostasis	2/107	71/18986	0.028169	4.99829	2.54102	0.060828	0.379743	0.356182	C1QTNF1/SERPINC1	2
GO:0072006	nephron development	3/107	160/18986	0.01875	3.32699	2.22527	0.0618573	0.379743	0.356182	CITED1/KLF15/CALB1	3
GO:0042593	glucose homeostasis	4/107	265/18986	0.0150943	2.67833	2.0713	0.0629716	0.379743	0.356182	PRKCE/IRS2/FABP5/KLF15	4
GO:0033500	carbohydrate homeostasis	4/107	266/18986	0.0150376	2.66826	2.06281	0.0636676	0.379743	0.356182	PRKCE/IRS2/FABP5/KLF15	4
GO:0002067	glandular epithelial cell differentiation	2/107	73/18986	0.0273973	4.86135	2.48844	0.0638692	0.379743	0.356182	BMP6/INSM1	2
GO:0050878	regulation of body fluid levels	5/107	381/18986	0.0131234	2.3286	1.97219	0.0644254	0.379743	0.356182	PRKCE/NPR1/C1QTNF1/SAA1/SERPINC1	5
GO:0090287	regulation of cellular response to growth factor stimulus	5/107	381/18986	0.0131234	2.3286	1.97219	0.0644254	0.379743	0.356182	CDH5/ZEB1/IL12A/CITED1/BMPER	5
GO:0071322	cellular response to carbohydrate stimulus	3/107	163/18986	0.0184049	3.26575	2.18711	0.0646545	0.379743	0.356182	PRKCE/IRS2/COLEC12	3
GO:0001553	luteinization	1/107	12/18986	0.0833333	14.7866	3.59647	0.0655898	0.379743	0.356182	INHBA	1
GO:0006705	mineralocorticoid biosynthetic process	1/107	12/18986	0.0833333	14.7866	3.59647	0.0655898	0.379743	0.356182	BMP6	1
GO:0007250	activation of NF-kappaB-inducing kinase activity	1/107	12/18986	0.0833333	14.7866	3.59647	0.0655898	0.379743	0.356182	TNFSF15	1
GO:0007494	midgut development	1/107	12/18986	0.0833333	14.7866	3.59647	0.0655898	0.379743	0.356182	FOXF1	1
GO:0009756	carbohydrate mediated signaling	1/107	12/18986	0.0833333	14.7866	3.59647	0.0655898	0.379743	0.356182	COLEC12	1
GO:0010752	regulation of cGMP-mediated signaling	1/107	12/18986	0.0833333	14.7866	3.59647	0.0655898	0.379743	0.356182	NPR1	1
GO:0015840	urea transport	1/107	12/18986	0.0833333	14.7866	3.59647	0.0655898	0.379743	0.356182	SLC14A2	1
GO:0030432	peristalsis	1/107	12/18986	0.0833333	14.7866	3.59647	0.0655898	0.379743	0.356182	SSTR2	1
GO:0031392	regulation of prostaglandin biosynthetic process	1/107	12/18986	0.0833333	14.7866	3.59647	0.0655898	0.379743	0.356182	FABP5	1
GO:0032276	regulation of gonadotropin secretion	1/107	12/18986	0.0833333	14.7866	3.59647	0.0655898	0.379743	0.356182	INHBA	1
GO:0032380	regulation of intracellular sterol transport	1/107	12/18986	0.0833333	14.7866	3.59647	0.0655898	0.379743	0.356182	PCSK9	1
GO:0032383	regulation of intracellular cholesterol transport	1/107	12/18986	0.0833333	14.7866	3.59647	0.0655898	0.379743	0.356182	PCSK9	1
GO:0035812	renal sodium excretion	1/107	12/18986	0.0833333	14.7866	3.59647	0.0655898	0.379743	0.356182	NPR1	1
GO:0051133	regulation of NK T cell activation	1/107	12/18986	0.0833333	14.7866	3.59647	0.0655898	0.379743	0.356182	IL12A	1
GO:0051549	positive regulation of keratinocyte migration	1/107	12/18986	0.0833333	14.7866	3.59647	0.0655898	0.379743	0.356182	HBEGF	1
GO:0061370	testosterone biosynthetic process	1/107	12/18986	0.0833333	14.7866	3.59647	0.0655898	0.379743	0.356182	INHBA	1
GO:0070671	response to interleukin-12	1/107	12/18986	0.0833333	14.7866	3.59647	0.0655898	0.379743	0.356182	IL12A	1
GO:0070857	regulation of bile acid biosynthetic process	1/107	12/18986	0.0833333	14.7866	3.59647	0.0655898	0.379743	0.356182	FGF19	1
GO:0071233	cellular response to L-leucine	1/107	12/18986	0.0833333	14.7866	3.59647	0.0655898	0.379743	0.356182	STAMBPL1	1
GO:0072017	distal tubule development	1/107	12/18986	0.0833333	14.7866	3.59647	0.0655898	0.379743	0.356182	CALB1	1
GO:0140105	interleukin-10-mediated signaling pathway	1/107	12/18986	0.0833333	14.7866	3.59647	0.0655898	0.379743	0.356182	IL10RA	1
GO:1900121	negative regulation of receptor binding	1/107	12/18986	0.0833333	14.7866	3.59647	0.0655898	0.379743	0.356182	PCSK9	1
GO:2000644	regulation of receptor catabolic process	1/107	12/18986	0.0833333	14.7866	3.59647	0.0655898	0.379743	0.356182	PCSK9	1
GO:0015833	peptide transport	4/107	270/18986	0.0148148	2.62873	2.02923	0.0664918	0.379743	0.356182	PRKCE/IRS2/CLEC4M/TRH	4
GO:0002090	regulation of receptor internalization	2/107	75/18986	0.0266667	4.73171	2.43775	0.0669608	0.379743	0.356182	ARC/PCSK9	2
GO:0001707	mesoderm formation	2/107	76/18986	0.0263158	4.66945	2.41307	0.0685251	0.379743	0.356182	INHBA/FOXF1	2
GO:0050818	regulation of coagulation	2/107	76/18986	0.0263158	4.66945	2.41307	0.0685251	0.379743	0.356182	C1QTNF1/SERPINC1	2
GO:0097305	response to alcohol	4/107	275/18986	0.0145455	2.58093	1.98811	0.070113	0.379743	0.356182	PRKCE/ARC/INHBA/HPGD	4
GO:0001886	endothelial cell morphogenesis	1/107	13/18986	0.0769231	13.6492	3.43458	0.0708592	0.379743	0.356182	CDH5	1
GO:0006054	N-acetylneuraminate metabolic process	1/107	13/18986	0.0769231	13.6492	3.43458	0.0708592	0.379743	0.356182	NPL	1
GO:0006787	porphyrin-containing compound catabolic process	1/107	13/18986	0.0769231	13.6492	3.43458	0.0708592	0.379743	0.356182	SLCO2B1	1
GO:0010944	negative regulation of transcription by competitive promoter binding	1/107	13/18986	0.0769231	13.6492	3.43458	0.0708592	0.379743	0.356182	BHLHE41	1
GO:0014051	gamma-aminobutyric acid secretion	1/107	13/18986	0.0769231	13.6492	3.43458	0.0708592	0.379743	0.356182	TRH	1
GO:0021979	hypothalamus cell differentiation	1/107	13/18986	0.0769231	13.6492	3.43458	0.0708592	0.379743	0.356182	OTP	1
GO:0032341	aldosterone metabolic process	1/107	13/18986	0.0769231	13.6492	3.43458	0.0708592	0.379743	0.356182	BMP6	1
GO:0032377	regulation of intracellular lipid transport	1/107	13/18986	0.0769231	13.6492	3.43458	0.0708592	0.379743	0.356182	PCSK9	1
GO:0033015	tetrapyrrole catabolic process	1/107	13/18986	0.0769231	13.6492	3.43458	0.0708592	0.379743	0.356182	SLCO2B1	1
GO:0034111	negative regulation of homotypic cell-cell adhesion	1/107	13/18986	0.0769231	13.6492	3.43458	0.0708592	0.379743	0.356182	C1QTNF1	1
GO:0035810	positive regulation of urine volume	1/107	13/18986	0.0769231	13.6492	3.43458	0.0708592	0.379743	0.356182	NPR1	1
GO:0043301	negative regulation of leukocyte degranulation	1/107	13/18986	0.0769231	13.6492	3.43458	0.0708592	0.379743	0.356182	FOXF1	1
GO:0044406	adhesion of symbiont to host	1/107	13/18986	0.0769231	13.6492	3.43458	0.0708592	0.379743	0.356182	CLEC4M	1
GO:0051280	negative regulation of release of sequestered calcium ion into cytosol	1/107	13/18986	0.0769231	13.6492	3.43458	0.0708592	0.379743	0.356182	CASQ2	1
GO:0051451	myoblast migration	1/107	13/18986	0.0769231	13.6492	3.43458	0.0708592	0.379743	0.356182	THBS4	1
GO:0061029	eyelid development in camera-type eye	1/107	13/18986	0.0769231	13.6492	3.43458	0.0708592	0.379743	0.356182	INHBA	1
GO:0070493	thrombin-activated receptor signaling pathway	1/107	13/18986	0.0769231	13.6492	3.43458	0.0708592	0.379743	0.356182	HPGD	1
GO:0071377	cellular response to glucagon stimulus	1/107	13/18986	0.0769231	13.6492	3.43458	0.0708592	0.379743	0.356182	GLP2R	1
GO:0071415	cellular response to purine-containing compound	1/107	13/18986	0.0769231	13.6492	3.43458	0.0708592	0.379743	0.356182	CASQ2	1
GO:0075509	endocytosis involved in viral entry into host cell	1/107	13/18986	0.0769231	13.6492	3.43458	0.0708592	0.379743	0.356182	CLEC4M	1
GO:0001678	intracellular glucose homeostasis	3/107	170/18986	0.0176471	3.13128	2.1014	0.0714046	0.379743	0.356182	PRKCE/IRS2/KLF15	3
GO:0007204	positive regulation of cytosolic calcium ion concentration	3/107	170/18986	0.0176471	3.13128	2.1014	0.0714046	0.379743	0.356182	CALCR/C1QTNF1/SAA1	3
GO:0008544	epidermis development	5/107	393/18986	0.0127226	2.2575	1.89643	0.071511	0.379743	0.356182	FABP5/INHBA/KRT9/CLRN1/SPRR3	5
GO:0032890	regulation of organic acid transport	2/107	78/18986	0.025641	4.54972	2.36498	0.0716897	0.379743	0.356182	IRS2/TRH	2
GO:0048332	mesoderm morphogenesis	2/107	78/18986	0.025641	4.54972	2.36498	0.0716897	0.379743	0.356182	INHBA/FOXF1	2
GO:0051145	smooth muscle cell differentiation	2/107	79/18986	0.0253165	4.49213	2.34154	0.0732896	0.379743	0.356182	ZEB1/FOXF1	2
GO:0030509	BMP signaling pathway	3/107	172/18986	0.0174419	3.09487	2.07773	0.0733894	0.379743	0.356182	CDH5/BMP6/BMPER	3
GO:0030856	regulation of epithelial cell differentiation	3/107	172/18986	0.0174419	3.09487	2.07773	0.0733894	0.379743	0.356182	CDH5/ZEB1/BMP6	3
GO:0050796	regulation of insulin secretion	3/107	173/18986	0.017341	3.07698	2.06602	0.0743911	0.379743	0.356182	PRKCE/IRS2/TRH	3
GO:0005513	detection of calcium ion	1/107	14/18986	0.0714286	12.6742	3.2896	0.0760992	0.379743	0.356182	CASQ2	1
GO:0008212	mineralocorticoid metabolic process	1/107	14/18986	0.0714286	12.6742	3.2896	0.0760992	0.379743	0.356182	BMP6	1
GO:0031115	negative regulation of microtubule polymerization	1/107	14/18986	0.0714286	12.6742	3.2896	0.0760992	0.379743	0.356182	CDH5	1
GO:0034309	primary alcohol biosynthetic process	1/107	14/18986	0.0714286	12.6742	3.2896	0.0760992	0.379743	0.356182	BMP6	1
GO:0042541	hemoglobin biosynthetic process	1/107	14/18986	0.0714286	12.6742	3.2896	0.0760992	0.379743	0.356182	INHBA	1
GO:0043306	positive regulation of mast cell degranulation	1/107	14/18986	0.0714286	12.6742	3.2896	0.0760992	0.379743	0.356182	FGR	1
GO:0044857	plasma membrane raft organization	1/107	14/18986	0.0714286	12.6742	3.2896	0.0760992	0.379743	0.356182	COLEC12	1
GO:0045916	negative regulation of complement activation	1/107	14/18986	0.0714286	12.6742	3.2896	0.0760992	0.379743	0.356182	CR2	1
GO:0051547	regulation of keratinocyte migration	1/107	14/18986	0.0714286	12.6742	3.2896	0.0760992	0.379743	0.356182	HBEGF	1
GO:0051775	response to redox state	1/107	14/18986	0.0714286	12.6742	3.2896	0.0760992	0.379743	0.356182	ARHGDIB	1
GO:0061469	regulation of type B pancreatic cell proliferation	1/107	14/18986	0.0714286	12.6742	3.2896	0.0760992	0.379743	0.356182	IRS2	1
GO:0071107	response to parathyroid hormone	1/107	14/18986	0.0714286	12.6742	3.2896	0.0760992	0.379743	0.356182	CITED1	1
GO:2001279	regulation of unsaturated fatty acid biosynthetic process	1/107	14/18986	0.0714286	12.6742	3.2896	0.0760992	0.379743	0.356182	FABP5	1
GO:0021536	diencephalon development	2/107	81/18986	0.0246914	4.38122	2.2958	0.0765238	0.379743	0.356182	SOX3/OTP	2
GO:0042440	pigment metabolic process	2/107	81/18986	0.0246914	4.38122	2.2958	0.0765238	0.379743	0.356182	SLCO2B1/CITED1	2
GO:0043299	leukocyte degranulation	2/107	81/18986	0.0246914	4.38122	2.2958	0.0765238	0.379743	0.356182	FGR/FOXF1	2
GO:1903036	positive regulation of response to wounding	2/107	81/18986	0.0246914	4.38122	2.2958	0.0765238	0.379743	0.356182	PRKCE/HBEGF	2
GO:0042113	B cell activation	4/107	284/18986	0.0140845	2.49914	1.91631	0.0768824	0.379743	0.356182	IRS2/INHBA/CMTM7/CR2	4
GO:0050806	positive regulation of synaptic transmission	3/107	176/18986	0.0170455	3.02453	2.0314	0.0774327	0.379743	0.356182	PRKCE/ARC/CALB1	3
GO:0002028	regulation of sodium ion transport	2/107	82/18986	0.0243902	4.32779	2.27349	0.0781577	0.379743	0.356182	PRKCE/PCSK9	2
GO:0014823	response to activity	2/107	82/18986	0.0243902	4.32779	2.27349	0.0781577	0.379743	0.356182	ZEB1/BMP6	2
GO:0019233	sensory perception of pain	2/107	83/18986	0.0240964	4.27564	2.25153	0.0798026	0.379743	0.356182	FABP5/PRDM12	2
GO:0048844	artery morphogenesis	2/107	83/18986	0.0240964	4.27564	2.25153	0.0798026	0.379743	0.356182	HPGD/FOXF1	2
GO:0051279	regulation of release of sequestered calcium ion into cytosol	2/107	83/18986	0.0240964	4.27564	2.25153	0.0798026	0.379743	0.356182	PRKCE/CASQ2	2
GO:0001936	regulation of endothelial cell proliferation	3/107	179/18986	0.0167598	2.97384	1.9975	0.0805284	0.379743	0.356182	THBS4/IL12A/BMP6	3
GO:0002430	complement receptor mediated signaling pathway	1/107	15/18986	0.0666667	11.8293	3.1587	0.0813099	0.379743	0.356182	CR2	1
GO:0002713	negative regulation of B cell mediated immunity	1/107	15/18986	0.0666667	11.8293	3.1587	0.0813099	0.379743	0.356182	CR2	1
GO:0002890	negative regulation of immunoglobulin mediated immune response	1/107	15/18986	0.0666667	11.8293	3.1587	0.0813099	0.379743	0.356182	CR2	1
GO:0002903	negative regulation of B cell apoptotic process	1/107	15/18986	0.0666667	11.8293	3.1587	0.0813099	0.379743	0.356182	IRS2	1
GO:0007567	parturition	1/107	15/18986	0.0666667	11.8293	3.1587	0.0813099	0.379743	0.356182	HPGD	1
GO:0010763	positive regulation of fibroblast migration	1/107	15/18986	0.0666667	11.8293	3.1587	0.0813099	0.379743	0.356182	PRKCE	1
GO:0010989	negative regulation of low-density lipoprotein particle clearance	1/107	15/18986	0.0666667	11.8293	3.1587	0.0813099	0.379743	0.356182	PCSK9	1
GO:0031000	response to caffeine	1/107	15/18986	0.0666667	11.8293	3.1587	0.0813099	0.379743	0.356182	CASQ2	1
GO:0032352	positive regulation of hormone metabolic process	1/107	15/18986	0.0666667	11.8293	3.1587	0.0813099	0.379743	0.356182	BMP6	1
GO:0035358	regulation of peroxisome proliferator activated receptor signaling pathway	1/107	15/18986	0.0666667	11.8293	3.1587	0.0813099	0.379743	0.356182	FABP5	1
GO:0043201	response to L-leucine	1/107	15/18986	0.0666667	11.8293	3.1587	0.0813099	0.379743	0.356182	STAMBPL1	1
GO:0046321	positive regulation of fatty acid oxidation	1/107	15/18986	0.0666667	11.8293	3.1587	0.0813099	0.379743	0.356182	IRS2	1
GO:0046348	amino sugar catabolic process	1/107	15/18986	0.0666667	11.8293	3.1587	0.0813099	0.379743	0.356182	NPL	1
GO:0051284	positive regulation of sequestering of calcium ion	1/107	15/18986	0.0666667	11.8293	3.1587	0.0813099	0.379743	0.356182	CASQ2	1
GO:0051956	negative regulation of amino acid transport	1/107	15/18986	0.0666667	11.8293	3.1587	0.0813099	0.379743	0.356182	TRH	1
GO:0071361	cellular response to ethanol	1/107	15/18986	0.0666667	11.8293	3.1587	0.0813099	0.379743	0.356182	PRKCE	1
GO:0072044	collecting duct development	1/107	15/18986	0.0666667	11.8293	3.1587	0.0813099	0.379743	0.356182	CALB1	1
GO:0090030	regulation of steroid hormone biosynthetic process	1/107	15/18986	0.0666667	11.8293	3.1587	0.0813099	0.379743	0.356182	BMP6	1
GO:1900452	regulation of long-term synaptic depression	1/107	15/18986	0.0666667	11.8293	3.1587	0.0813099	0.379743	0.356182	ARC	1
GO:1904251	regulation of bile acid metabolic process	1/107	15/18986	0.0666667	11.8293	3.1587	0.0813099	0.379743	0.356182	FGF19	1
GO:1904936	interneuron migration	1/107	15/18986	0.0666667	11.8293	3.1587	0.0813099	0.379743	0.356182	LHX6	1
GO:0002228	natural killer cell mediated immunity	2/107	84/18986	0.0238095	4.22474	2.22992	0.0814583	0.379743	0.356182	IL12A/CALHM6	2
GO:0002697	regulation of immune effector process	5/107	410/18986	0.0121951	2.16389	1.79365	0.082256	0.379743	0.356182	FGR/IL12A/FOXF1/CALHM6/CR2	5
GO:0030593	neutrophil chemotaxis	2/107	85/18986	0.0235294	4.17504	2.20864	0.0831246	0.379743	0.356182	THBS4/SAA1	2
GO:0032418	lysosome localization	2/107	85/18986	0.0235294	4.17504	2.20864	0.0831246	0.379743	0.356182	FGR/FOXF1	2
GO:0015850	organic hydroxy compound transport	4/107	292/18986	0.0136986	2.43067	1.85477	0.0831667	0.379743	0.356182	SLCO2B1/BMP6/C1QTNF1/PCSK9	4
GO:0001570	vasculogenesis	2/107	86/18986	0.0232558	4.12649	2.18768	0.0848014	0.379743	0.356182	CITED1/FOXF1	2
GO:0050810	regulation of steroid biosynthetic process	2/107	86/18986	0.0232558	4.12649	2.18768	0.0848014	0.379743	0.356182	FGF19/BMP6	2
GO:1990849	vacuolar localization	2/107	86/18986	0.0232558	4.12649	2.18768	0.0848014	0.379743	0.356182	FGR/FOXF1	2
GO:0071772	response to BMP	3/107	184/18986	0.0163043	2.89303	1.94255	0.085806	0.379743	0.356182	CDH5/BMP6/BMPER	3
GO:0071773	cellular response to BMP stimulus	3/107	184/18986	0.0163043	2.89303	1.94255	0.085806	0.379743	0.356182	CDH5/BMP6/BMPER	3
GO:0007492	endoderm development	2/107	87/18986	0.0229885	4.07906	2.16704	0.0864885	0.379743	0.356182	ARC/INHBA	2
GO:0045913	positive regulation of carbohydrate metabolic process	2/107	87/18986	0.0229885	4.07906	2.16704	0.0864885	0.379743	0.356182	PRKCE/IRS2	2
GO:0002756	MyD88-independent toll-like receptor signaling pathway	1/107	16/18986	0.0625	11.09	3.03965	0.0864915	0.379743	0.356182	PRKCE	1
GO:0003214	cardiac left ventricle morphogenesis	1/107	16/18986	0.0625	11.09	3.03965	0.0864915	0.379743	0.356182	FOXF1	1
GO:0006750	glutathione biosynthetic process	1/107	16/18986	0.0625	11.09	3.03965	0.0864915	0.379743	0.356182	CHAC2	1
GO:0010649	regulation of cell communication by electrical coupling	1/107	16/18986	0.0625	11.09	3.03965	0.0864915	0.379743	0.356182	CASQ2	1
GO:0010832	negative regulation of myotube differentiation	1/107	16/18986	0.0625	11.09	3.03965	0.0864915	0.379743	0.356182	BHLHE41	1
GO:0010838	positive regulation of keratinocyte proliferation	1/107	16/18986	0.0625	11.09	3.03965	0.0864915	0.379743	0.356182	AREG	1
GO:0032230	positive regulation of synaptic transmission, GABAergic	1/107	16/18986	0.0625	11.09	3.03965	0.0864915	0.379743	0.356182	PRKCE	1
GO:0032354	response to follicle-stimulating hormone	1/107	16/18986	0.0625	11.09	3.03965	0.0864915	0.379743	0.356182	INHBA	1
GO:0035641	locomotory exploration behavior	1/107	16/18986	0.0625	11.09	3.03965	0.0864915	0.379743	0.356182	PRKCE	1
GO:0042415	norepinephrine metabolic process	1/107	16/18986	0.0625	11.09	3.03965	0.0864915	0.379743	0.356182	INSM1	1
GO:0043605	amide catabolic process	1/107	16/18986	0.0625	11.09	3.03965	0.0864915	0.379743	0.356182	UROC1	1
GO:0060841	venous blood vessel development	1/107	16/18986	0.0625	11.09	3.03965	0.0864915	0.379743	0.356182	FOXF1	1
GO:0099509	regulation of presynaptic cytosolic calcium ion concentration	1/107	16/18986	0.0625	11.09	3.03965	0.0864915	0.379743	0.356182	CALB1	1
GO:1900120	regulation of receptor binding	1/107	16/18986	0.0625	11.09	3.03965	0.0864915	0.379743	0.356182	PCSK9	1
GO:0046651	lymphocyte proliferation	4/107	297/18986	0.013468	2.38975	1.81732	0.0872197	0.379743	0.356182	IRS2/LMO1/IL12A/CR2	4
GO:0051962	positive regulation of nervous system development	4/107	297/18986	0.013468	2.38975	1.81732	0.0872197	0.379743	0.356182	SYNDIG1/FLRT3/EGR2/OTP	4
GO:0010232	vascular transport	2/107	88/18986	0.0227273	4.03271	2.1467	0.0881858	0.379743	0.356182	FABP5/SLCO2B1	2
GO:0032370	positive regulation of lipid transport	2/107	88/18986	0.0227273	4.03271	2.1467	0.0881858	0.379743	0.356182	BMP6/C1QTNF1	2
GO:0150104	transport across blood-brain barrier	2/107	88/18986	0.0227273	4.03271	2.1467	0.0881858	0.379743	0.356182	FABP5/SLCO2B1	2
GO:0032412	regulation of monoatomic ion transmembrane transporter activity	3/107	188/18986	0.0159574	2.83148	1.89991	0.0901319	0.379743	0.356182	ARC/CASQ2/PCSK9	3
GO:0035725	sodium ion transmembrane transport	3/107	188/18986	0.0159574	2.83148	1.89991	0.0901319	0.379743	0.356182	PRKCE/SLC6A19/PCSK9	3
GO:0007565	female pregnancy	3/107	189/18986	0.015873	2.8165	1.88942	0.0912275	0.379743	0.356182	ARHGDIB/HPGD/CLIC5	3
GO:0045766	positive regulation of angiogenesis	3/107	189/18986	0.015873	2.8165	1.88942	0.0912275	0.379743	0.356182	CDH5/ADAM12/BMPER	3
GO:0002091	negative regulation of receptor internalization	1/107	17/18986	0.0588235	10.4376	2.9307	0.0916441	0.379743	0.356182	PCSK9	1
GO:0021783	preganglionic parasympathetic fiber development	1/107	17/18986	0.0588235	10.4376	2.9307	0.0916441	0.379743	0.356182	EGR2	1
GO:0043117	positive regulation of vascular permeability	1/107	17/18986	0.0588235	10.4376	2.9307	0.0916441	0.379743	0.356182	BMP6	1
GO:0045198	establishment of epithelial cell apical/basal polarity	1/107	17/18986	0.0588235	10.4376	2.9307	0.0916441	0.379743	0.356182	FOXF1	1
GO:0045725	positive regulation of glycogen biosynthetic process	1/107	17/18986	0.0588235	10.4376	2.9307	0.0916441	0.379743	0.356182	IRS2	1
GO:0046068	cGMP metabolic process	1/107	17/18986	0.0588235	10.4376	2.9307	0.0916441	0.379743	0.356182	NPR1	1
GO:0048532	anatomical structure arrangement	1/107	17/18986	0.0588235	10.4376	2.9307	0.0916441	0.379743	0.356182	EGR2	1
GO:0048557	embryonic digestive tract morphogenesis	1/107	17/18986	0.0588235	10.4376	2.9307	0.0916441	0.379743	0.356182	FOXF1	1
GO:0060080	inhibitory postsynaptic potential	1/107	17/18986	0.0588235	10.4376	2.9307	0.0916441	0.379743	0.356182	INSYN2A	1
GO:0060644	mammary gland epithelial cell differentiation	1/107	17/18986	0.0588235	10.4376	2.9307	0.0916441	0.379743	0.356182	FOXF1	1
GO:0061548	ganglion development	1/107	17/18986	0.0588235	10.4376	2.9307	0.0916441	0.379743	0.356182	INSM1	1
GO:0070254	mucus secretion	1/107	17/18986	0.0588235	10.4376	2.9307	0.0916441	0.379743	0.356182	PRKCE	1
GO:0071360	cellular response to exogenous dsRNA	1/107	17/18986	0.0588235	10.4376	2.9307	0.0916441	0.379743	0.356182	COLEC12	1
GO:0071380	cellular response to prostaglandin E stimulus	1/107	17/18986	0.0588235	10.4376	2.9307	0.0916441	0.379743	0.356182	PRKCE	1
GO:0090136	epithelial cell-cell adhesion	1/107	17/18986	0.0588235	10.4376	2.9307	0.0916441	0.379743	0.356182	THBS4	1
GO:0097091	synaptic vesicle clustering	1/107	17/18986	0.0588235	10.4376	2.9307	0.0916441	0.379743	0.356182	SYNDIG1	1
GO:0141161	regulation of cAMP/PKA signal transduction	1/107	17/18986	0.0588235	10.4376	2.9307	0.0916441	0.379743	0.356182	CALCR	1
GO:1900747	negative regulation of vascular endothelial growth factor signaling pathway	1/107	17/18986	0.0588235	10.4376	2.9307	0.0916441	0.379743	0.356182	IL12A	1
GO:1901550	regulation of endothelial cell development	1/107	17/18986	0.0588235	10.4376	2.9307	0.0916441	0.379743	0.356182	CDH5	1
GO:1903140	regulation of establishment of endothelial barrier	1/107	17/18986	0.0588235	10.4376	2.9307	0.0916441	0.379743	0.356182	CDH5	1
GO:2000311	regulation of AMPA receptor activity	1/107	17/18986	0.0588235	10.4376	2.9307	0.0916441	0.379743	0.356182	ARC	1
GO:0061138	morphogenesis of a branching epithelium	3/107	190/18986	0.0157895	2.80167	1.879	0.0923288	0.379743	0.356182	AREG/CITED1/FOXF1	3
GO:0006874	intracellular calcium ion homeostasis	4/107	304/18986	0.0131579	2.33473	1.76614	0.0930529	0.379743	0.356182	PRKCE/CDH5/CASQ2/CALB1	4
GO:0010469	regulation of signaling receptor activity	2/107	91/18986	0.021978	3.89976	2.08746	0.0933367	0.379743	0.356182	ARC/PCSK9	2
GO:0051591	response to cAMP	2/107	91/18986	0.021978	3.89976	2.08746	0.0933367	0.379743	0.356182	AREG/CITED1	2
GO:0071230	cellular response to amino acid stimulus	2/107	91/18986	0.021978	3.89976	2.08746	0.0933367	0.379743	0.356182	ZEB1/STAMBPL1	2
GO:0006694	steroid biosynthetic process	3/107	191/18986	0.0157068	2.787	1.86865	0.0934355	0.379743	0.356182	INHBA/FGF19/BMP6	3
GO:0032943	mononuclear cell proliferation	4/107	305/18986	0.0131148	2.32707	1.75894	0.0939012	0.379743	0.356182	IRS2/LMO1/IL12A/CR2	4
GO:1904018	positive regulation of vasculature development	3/107	192/18986	0.015625	2.77249	1.85837	0.0945478	0.379743	0.356182	CDH5/ADAM12/BMPER	3
GO:0071560	cellular response to transforming growth factor beta stimulus	4/107	306/18986	0.0130719	2.31947	1.75178	0.0947532	0.379743	0.356182	CDH5/ZEB1/HPGD/CITED1	4
GO:0001656	metanephros development	2/107	92/18986	0.0217391	3.85738	2.06827	0.0950729	0.379743	0.356182	CITED1/CALB1	2
GO:0042100	B cell proliferation	2/107	92/18986	0.0217391	3.85738	2.06827	0.0950729	0.379743	0.356182	IRS2/CR2	2
GO:0006109	regulation of carbohydrate metabolic process	3/107	193/18986	0.015544	2.75812	1.84815	0.0956656	0.379743	0.356182	PRKCE/IRS2/C1QTNF1	3
GO:0003002	regionalization	5/107	430/18986	0.0116279	2.06325	1.67894	0.0959384	0.379743	0.356182	ARC/EGR2/DZIP1L/BHLHE41/FOXF1	5
GO:0002836	positive regulation of response to tumor cell	1/107	18/18986	0.0555556	9.85774	2.83045	0.096768	0.379743	0.356182	IL12A	1
GO:0002839	positive regulation of immune response to tumor cell	1/107	18/18986	0.0555556	9.85774	2.83045	0.096768	0.379743	0.356182	IL12A	1
GO:0002921	negative regulation of humoral immune response	1/107	18/18986	0.0555556	9.85774	2.83045	0.096768	0.379743	0.356182	CR2	1
GO:0002923	regulation of humoral immune response mediated by circulating immunoglobulin	1/107	18/18986	0.0555556	9.85774	2.83045	0.096768	0.379743	0.356182	CR2	1
GO:0006957	complement activation, alternative pathway	1/107	18/18986	0.0555556	9.85774	2.83045	0.096768	0.379743	0.356182	CR2	1
GO:0009404	toxin metabolic process	1/107	18/18986	0.0555556	9.85774	2.83045	0.096768	0.379743	0.356182	PRKCE	1
GO:0010544	negative regulation of platelet activation	1/107	18/18986	0.0555556	9.85774	2.83045	0.096768	0.379743	0.356182	C1QTNF1	1
GO:0019184	nonribosomal peptide biosynthetic process	1/107	18/18986	0.0555556	9.85774	2.83045	0.096768	0.379743	0.356182	CHAC2	1
GO:0032274	gonadotropin secretion	1/107	18/18986	0.0555556	9.85774	2.83045	0.096768	0.379743	0.356182	INHBA	1
GO:0044539	long-chain fatty acid import into cell	1/107	18/18986	0.0555556	9.85774	2.83045	0.096768	0.379743	0.356182	IRS2	1
GO:0046184	aldehyde biosynthetic process	1/107	18/18986	0.0555556	9.85774	2.83045	0.096768	0.379743	0.356182	BMP6	1
GO:0048368	lateral mesoderm development	1/107	18/18986	0.0555556	9.85774	2.83045	0.096768	0.379743	0.356182	FOXF1	1
GO:0060039	pericardium development	1/107	18/18986	0.0555556	9.85774	2.83045	0.096768	0.379743	0.356182	FLRT3	1
GO:0071371	cellular response to gonadotropin stimulus	1/107	18/18986	0.0555556	9.85774	2.83045	0.096768	0.379743	0.356182	INHBA	1
GO:0072189	ureter development	1/107	18/18986	0.0555556	9.85774	2.83045	0.096768	0.379743	0.356182	FOXF1	1
GO:1901163	regulation of trophoblast cell migration	1/107	18/18986	0.0555556	9.85774	2.83045	0.096768	0.379743	0.356182	ARHGDIB	1
GO:1901569	fatty acid derivative catabolic process	1/107	18/18986	0.0555556	9.85774	2.83045	0.096768	0.379743	0.356182	HPGD	1
GO:0045664	regulation of neuron differentiation	3/107	194/18986	0.0154639	2.74391	1.838	0.0967889	0.379743	0.356182	ZEB1/SOX3/BMP6	3
GO:0032410	negative regulation of transporter activity	2/107	93/18986	0.0215054	3.8159	2.04935	0.0968184	0.379743	0.356182	CASQ2/PCSK9	2
GO:0042692	muscle cell differentiation	5/107	432/18986	0.0115741	2.0537	1.66781	0.0973674	0.379743	0.356182	ZEB1/LDB3/ADAM12/BHLHE41/FOXF1	5
GO:0046890	regulation of lipid biosynthetic process	3/107	196/18986	0.0153061	2.71591	1.81788	0.0990516	0.379743	0.356182	FABP5/FGF19/BMP6	3
GO:0050807	regulation of synapse organization	4/107	312/18986	0.0128205	2.27486	1.70934	0.0999421	0.379743	0.356182	SYNDIG1/FLRT3/ARC/IL10RA	4
GO:0006006	glucose metabolic process	3/107	197/18986	0.0152284	2.70212	1.80792	0.100191	0.379743	0.356182	IRS2/FABP5/C1QTNF1	3
GO:0022898	regulation of transmembrane transporter activity	3/107	197/18986	0.0152284	2.70212	1.80792	0.100191	0.379743	0.356182	ARC/CASQ2/PCSK9	3
GO:0002690	positive regulation of leukocyte chemotaxis	2/107	95/18986	0.0210526	3.73556	2.01228	0.100337	0.379743	0.356182	THBS4/IL12A	2
GO:0007589	body fluid secretion	2/107	95/18986	0.0210526	3.73556	2.01228	0.100337	0.379743	0.356182	PRKCE/NPR1	2
GO:0071559	response to transforming growth factor beta	4/107	313/18986	0.0127796	2.26759	1.70237	0.10082	0.379743	0.356182	CDH5/ZEB1/HPGD/CITED1	4
GO:0002706	regulation of lymphocyte mediated immunity	3/107	198/18986	0.0151515	2.68847	1.79802	0.101336	0.379743	0.356182	IL12A/CALHM6/CR2	3
GO:0050727	regulation of inflammatory response	5/107	438/18986	0.0114155	2.02556	1.63478	0.101719	0.379743	0.356182	CDH5/FGR/IL10RA/FOXF1/SAA1	5
GO:0002281	macrophage activation involved in immune response	1/107	19/18986	0.0526316	9.33891	2.73775	0.101863	0.379743	0.356182	PRKCE	1
GO:0006144	purine nucleobase metabolic process	1/107	19/18986	0.0526316	9.33891	2.73775	0.101863	0.379743	0.356182	TTR	1
GO:0007625	grooming behavior	1/107	19/18986	0.0526316	9.33891	2.73775	0.101863	0.379743	0.356182	NMUR2	1
GO:0014048	regulation of glutamate secretion	1/107	19/18986	0.0526316	9.33891	2.73775	0.101863	0.379743	0.356182	TRH	1
GO:0020027	hemoglobin metabolic process	1/107	19/18986	0.0526316	9.33891	2.73775	0.101863	0.379743	0.356182	INHBA	1
GO:0031643	positive regulation of myelination	1/107	19/18986	0.0526316	9.33891	2.73775	0.101863	0.379743	0.356182	EGR2	1
GO:0032026	response to magnesium ion	1/107	19/18986	0.0526316	9.33891	2.73775	0.101863	0.379743	0.356182	BMP6	1
GO:0035269	protein O-linked mannosylation	1/107	19/18986	0.0526316	9.33891	2.73775	0.101863	0.379743	0.356182	CRPPA	1
GO:0045603	positive regulation of endothelial cell differentiation	1/107	19/18986	0.0526316	9.33891	2.73775	0.101863	0.379743	0.356182	BMP6	1
GO:0045945	positive regulation of transcription by RNA polymerase III	1/107	19/18986	0.0526316	9.33891	2.73775	0.101863	0.379743	0.356182	INHBA	1
GO:0048486	parasympathetic nervous system development	1/107	19/18986	0.0526316	9.33891	2.73775	0.101863	0.379743	0.356182	EGR2	1
GO:0051132	NK T cell activation	1/107	19/18986	0.0526316	9.33891	2.73775	0.101863	0.379743	0.356182	IL12A	1
GO:0060088	auditory receptor cell stereocilium organization	1/107	19/18986	0.0526316	9.33891	2.73775	0.101863	0.379743	0.356182	CLRN1	1
GO:0060231	mesenchymal to epithelial transition	1/107	19/18986	0.0526316	9.33891	2.73775	0.101863	0.379743	0.356182	CITED1	1
GO:0060438	trachea development	1/107	19/18986	0.0526316	9.33891	2.73775	0.101863	0.379743	0.356182	FOXF1	1
GO:0061450	trophoblast cell migration	1/107	19/18986	0.0526316	9.33891	2.73775	0.101863	0.379743	0.356182	ARHGDIB	1
GO:1902548	negative regulation of cellular response to vascular endothelial growth factor stimulus	1/107	19/18986	0.0526316	9.33891	2.73775	0.101863	0.379743	0.356182	IL12A	1
GO:1904044	response to aldosterone	1/107	19/18986	0.0526316	9.33891	2.73775	0.101863	0.379743	0.356182	INHBA	1
GO:0045666	positive regulation of neuron differentiation	2/107	96/18986	0.0208333	3.69665	1.99412	0.102109	0.379932	0.35636	ZEB1/BMP6	2
GO:0033555	multicellular organismal response to stress	2/107	97/18986	0.0206186	3.65854	1.97621	0.10389	0.384286	0.360444	THBS4/NMUR2	2
GO:0050803	regulation of synapse structure or activity	4/107	318/18986	0.0125786	2.23194	1.66787	0.105261	0.384286	0.360444	SYNDIG1/FLRT3/ARC/IL10RA	4
GO:0002902	regulation of B cell apoptotic process	1/107	20/18986	0.05	8.87196	2.65166	0.10693	0.384286	0.360444	IRS2	1
GO:0031998	regulation of fatty acid beta-oxidation	1/107	20/18986	0.05	8.87196	2.65166	0.10693	0.384286	0.360444	IRS2	1
GO:0032332	positive regulation of chondrocyte differentiation	1/107	20/18986	0.05	8.87196	2.65166	0.10693	0.384286	0.360444	BMP6	1
GO:0034393	positive regulation of smooth muscle cell apoptotic process	1/107	20/18986	0.05	8.87196	2.65166	0.10693	0.384286	0.360444	IL12A	1
GO:0048266	behavioral response to pain	1/107	20/18986	0.05	8.87196	2.65166	0.10693	0.384286	0.360444	THBS4	1
GO:0051546	keratinocyte migration	1/107	20/18986	0.05	8.87196	2.65166	0.10693	0.384286	0.360444	HBEGF	1
GO:0060314	regulation of ryanodine-sensitive calcium-release channel activity	1/107	20/18986	0.05	8.87196	2.65166	0.10693	0.384286	0.360444	CASQ2	1
GO:0060602	branch elongation of an epithelium	1/107	20/18986	0.05	8.87196	2.65166	0.10693	0.384286	0.360444	AREG	1
GO:0070875	positive regulation of glycogen metabolic process	1/107	20/18986	0.05	8.87196	2.65166	0.10693	0.384286	0.360444	IRS2	1
GO:0097254	renal tubular secretion	1/107	20/18986	0.05	8.87196	2.65166	0.10693	0.384286	0.360444	NPR1	1
GO:1902001	fatty acid transmembrane transport	1/107	20/18986	0.05	8.87196	2.65166	0.10693	0.384286	0.360444	IRS2	1
GO:0021953	central nervous system neuron differentiation	3/107	203/18986	0.0147783	2.62225	1.74941	0.107138	0.384286	0.360444	LHX6/INHBA/OTP	3
GO:0050848	regulation of calcium-mediated signaling	2/107	99/18986	0.020202	3.58463	1.94108	0.107478	0.384286	0.360444	CALCR/NMUR2	2
GO:0051781	positive regulation of cell division	2/107	99/18986	0.020202	3.58463	1.94108	0.107478	0.384286	0.360444	PRKCE/THBS4	2
GO:0060993	kidney morphogenesis	2/107	99/18986	0.020202	3.58463	1.94108	0.107478	0.384286	0.360444	CITED1/CALB1	2
GO:0071375	cellular response to peptide hormone stimulus	4/107	321/18986	0.0124611	2.21108	1.64748	0.107969	0.384286	0.360444	IRS2/INHBA/GLP2R/PCSK9	4
GO:0090276	regulation of peptide hormone secretion	3/107	204/18986	0.0147059	2.6094	1.73987	0.108314	0.384286	0.360444	PRKCE/IRS2/TRH	3
GO:0071229	cellular response to acid chemical	2/107	100/18986	0.02	3.54879	1.92385	0.109285	0.384286	0.360444	ZEB1/STAMBPL1	2
GO:0030073	insulin secretion	3/107	206/18986	0.0145631	2.58407	1.72095	0.11068	0.384286	0.360444	PRKCE/IRS2/TRH	3
GO:0048661	positive regulation of smooth muscle cell proliferation	2/107	101/18986	0.019802	3.51365	1.90684	0.111099	0.384286	0.360444	HBEGF/HPGD	2
GO:0072080	nephron tubule development	2/107	101/18986	0.019802	3.51365	1.90684	0.111099	0.384286	0.360444	CITED1/CALB1	2
GO:0001763	morphogenesis of a branching structure	3/107	207/18986	0.0144928	2.57158	1.71157	0.111871	0.384286	0.360444	AREG/CITED1/FOXF1	3
GO:0002791	regulation of peptide secretion	3/107	207/18986	0.0144928	2.57158	1.71157	0.111871	0.384286	0.360444	PRKCE/IRS2/TRH	3
GO:0090087	regulation of peptide transport	3/107	207/18986	0.0144928	2.57158	1.71157	0.111871	0.384286	0.360444	PRKCE/IRS2/TRH	3
GO:0006700	C21-steroid hormone biosynthetic process	1/107	21/18986	0.047619	8.44949	2.57139	0.111968	0.384286	0.360444	BMP6	1
GO:0009190	cyclic nucleotide biosynthetic process	1/107	21/18986	0.047619	8.44949	2.57139	0.111968	0.384286	0.360444	NPR1	1
GO:0010224	response to UV-B	1/107	21/18986	0.047619	8.44949	2.57139	0.111968	0.384286	0.360444	IL12A	1
GO:0010566	regulation of ketone biosynthetic process	1/107	21/18986	0.047619	8.44949	2.57139	0.111968	0.384286	0.360444	BMP6	1
GO:0010829	negative regulation of D-glucose transmembrane transport	1/107	21/18986	0.047619	8.44949	2.57139	0.111968	0.384286	0.360444	FABP5	1
GO:0010985	negative regulation of lipoprotein particle clearance	1/107	21/18986	0.047619	8.44949	2.57139	0.111968	0.384286	0.360444	PCSK9	1
GO:0015812	gamma-aminobutyric acid transport	1/107	21/18986	0.047619	8.44949	2.57139	0.111968	0.384286	0.360444	TRH	1
GO:0032930	positive regulation of superoxide anion generation	1/107	21/18986	0.047619	8.44949	2.57139	0.111968	0.384286	0.360444	PRKCE	1
GO:0035268	protein mannosylation	1/107	21/18986	0.047619	8.44949	2.57139	0.111968	0.384286	0.360444	CRPPA	1
GO:0048535	lymph node development	1/107	21/18986	0.047619	8.44949	2.57139	0.111968	0.384286	0.360444	RCBTB2	1
GO:0050965	detection of temperature stimulus involved in sensory perception of pain	1/107	21/18986	0.047619	8.44949	2.57139	0.111968	0.384286	0.360444	PRDM12	1
GO:0051930	regulation of sensory perception of pain	1/107	21/18986	0.047619	8.44949	2.57139	0.111968	0.384286	0.360444	FABP5	1
GO:0051931	regulation of sensory perception	1/107	21/18986	0.047619	8.44949	2.57139	0.111968	0.384286	0.360444	FABP5	1
GO:0052695	cellular glucuronidation	1/107	21/18986	0.047619	8.44949	2.57139	0.111968	0.384286	0.360444	PRKCE	1
GO:0060973	cell migration involved in heart development	1/107	21/18986	0.047619	8.44949	2.57139	0.111968	0.384286	0.360444	FLRT3	1
GO:0071397	cellular response to cholesterol	1/107	21/18986	0.047619	8.44949	2.57139	0.111968	0.384286	0.360444	INHBA	1
GO:0140354	lipid import into cell	1/107	21/18986	0.047619	8.44949	2.57139	0.111968	0.384286	0.360444	IRS2	1
GO:2000047	regulation of cell-cell adhesion mediated by cadherin	1/107	21/18986	0.047619	8.44949	2.57139	0.111968	0.384286	0.360444	BMP6	1
GO:0030101	natural killer cell activation	2/107	102/18986	0.0196078	3.4792	1.89005	0.112922	0.385178	0.36128	FGR/IL12A	2
GO:0035282	segmentation	2/107	102/18986	0.0196078	3.4792	1.89005	0.112922	0.385178	0.36128	EGR2/FOXF1	2
GO:1904951	positive regulation of establishment of protein localization	4/107	327/18986	0.0122324	2.17051	1.60736	0.113478	0.385178	0.36128	PRKCE/IRS2/BMP6/TRH	4
GO:0051216	cartilage development	3/107	209/18986	0.0143541	2.54697	1.69298	0.114268	0.385178	0.36128	ZEB1/OGN/BMP6	3
GO:0060326	cell chemotaxis	4/107	328/18986	0.0121951	2.16389	1.60076	0.114408	0.385178	0.36128	HBEGF/THBS4/IL12A/SAA1	4
GO:2000177	regulation of neural precursor cell proliferation	2/107	103/18986	0.0194175	3.44542	1.87346	0.114752	0.385178	0.36128	OTP/INSM1	2
GO:0055074	calcium ion homeostasis	4/107	329/18986	0.0121581	2.15732	1.59418	0.115342	0.385178	0.36128	PRKCE/CDH5/CASQ2/CALB1	4
GO:0044703	multi-organism reproductive process	3/107	210/18986	0.0142857	2.53485	1.68376	0.115474	0.385178	0.36128	ARHGDIB/HPGD/CLIC5	3
GO:0002093	auditory receptor cell morphogenesis	1/107	22/18986	0.0454545	8.06542	2.49627	0.116979	0.385178	0.36128	CLRN1	1
GO:0007530	sex determination	1/107	22/18986	0.0454545	8.06542	2.49627	0.116979	0.385178	0.36128	SOX3	1
GO:0009713	catechol-containing compound biosynthetic process	1/107	22/18986	0.0454545	8.06542	2.49627	0.116979	0.385178	0.36128	INSM1	1
GO:0010988	regulation of low-density lipoprotein particle clearance	1/107	22/18986	0.0454545	8.06542	2.49627	0.116979	0.385178	0.36128	PCSK9	1
GO:0018394	peptidyl-lysine acetylation	1/107	22/18986	0.0454545	8.06542	2.49627	0.116979	0.385178	0.36128	KLF15	1
GO:0021756	striatum development	1/107	22/18986	0.0454545	8.06542	2.49627	0.116979	0.385178	0.36128	INHBA	1
GO:0032816	positive regulation of natural killer cell activation	1/107	22/18986	0.0454545	8.06542	2.49627	0.116979	0.385178	0.36128	IL12A	1
GO:0035089	establishment of apical/basal cell polarity	1/107	22/18986	0.0454545	8.06542	2.49627	0.116979	0.385178	0.36128	FOXF1	1
GO:0035809	regulation of urine volume	1/107	22/18986	0.0454545	8.06542	2.49627	0.116979	0.385178	0.36128	NPR1	1
GO:0042423	catecholamine biosynthetic process	1/107	22/18986	0.0454545	8.06542	2.49627	0.116979	0.385178	0.36128	INSM1	1
GO:0048485	sympathetic nervous system development	1/107	22/18986	0.0454545	8.06542	2.49627	0.116979	0.385178	0.36128	INSM1	1
GO:0071379	cellular response to prostaglandin stimulus	1/107	22/18986	0.0454545	8.06542	2.49627	0.116979	0.385178	0.36128	PRKCE	1
GO:0072234	metanephric nephron tubule development	1/107	22/18986	0.0454545	8.06542	2.49627	0.116979	0.385178	0.36128	CALB1	1
GO:0097502	mannosylation	1/107	22/18986	0.0454545	8.06542	2.49627	0.116979	0.385178	0.36128	CRPPA	1
GO:0098801	regulation of renal system process	1/107	22/18986	0.0454545	8.06542	2.49627	0.116979	0.385178	0.36128	NPR1	1
GO:0141156	cAMP/PKA signal transduction	1/107	22/18986	0.0454545	8.06542	2.49627	0.116979	0.385178	0.36128	CALCR	1
GO:0010906	regulation of glucose metabolic process	2/107	105/18986	0.0190476	3.3798	1.8409	0.118435	0.386754	0.362759	IRS2/C1QTNF1	2
GO:0061326	renal tubule development	2/107	105/18986	0.0190476	3.3798	1.8409	0.118435	0.386754	0.362759	CITED1/CALB1	2
GO:0007626	locomotory behavior	3/107	213/18986	0.0140845	2.49914	1.65643	0.11912	0.386754	0.362759	PRKCE/TRH/CALB1	3
GO:0008202	steroid metabolic process	4/107	334/18986	0.011976	2.12502	1.56163	0.120061	0.386754	0.362759	INHBA/FGF19/BMP6/PCSK9	4
GO:0051960	regulation of nervous system development	5/107	463/18986	0.0107991	1.91619	1.50255	0.120877	0.386754	0.362759	SYNDIG1/FLRT3/EGR2/BHLHE41/OTP	5
GO:0010881	regulation of cardiac muscle contraction by regulation of the release of sequestered calcium ion	1/107	23/18986	0.0434783	7.71475	2.42576	0.121961	0.386754	0.362759	CASQ2	1
GO:0030449	regulation of complement activation	1/107	23/18986	0.0434783	7.71475	2.42576	0.121961	0.386754	0.362759	CR2	1
GO:0032700	negative regulation of interleukin-17 production	1/107	23/18986	0.0434783	7.71475	2.42576	0.121961	0.386754	0.362759	IL12A	1
GO:0032928	regulation of superoxide anion generation	1/107	23/18986	0.0434783	7.71475	2.42576	0.121961	0.386754	0.362759	PRKCE	1
GO:0046794	transport of virus	1/107	23/18986	0.0434783	7.71475	2.42576	0.121961	0.386754	0.362759	CLEC4M	1
GO:0060008	Sertoli cell differentiation	1/107	23/18986	0.0434783	7.71475	2.42576	0.121961	0.386754	0.362759	INHBA	1
GO:0060444	branching involved in mammary gland duct morphogenesis	1/107	23/18986	0.0434783	7.71475	2.42576	0.121961	0.386754	0.362759	AREG	1
GO:0061318	renal filtration cell differentiation	1/107	23/18986	0.0434783	7.71475	2.42576	0.121961	0.386754	0.362759	KLF15	1
GO:0071359	cellular response to dsRNA	1/107	23/18986	0.0434783	7.71475	2.42576	0.121961	0.386754	0.362759	COLEC12	1
GO:0072112	podocyte differentiation	1/107	23/18986	0.0434783	7.71475	2.42576	0.121961	0.386754	0.362759	KLF15	1
GO:0097164	ammonium ion metabolic process	1/107	23/18986	0.0434783	7.71475	2.42576	0.121961	0.386754	0.362759	TRH	1
GO:0150105	protein localization to cell-cell junction	1/107	23/18986	0.0434783	7.71475	2.42576	0.121961	0.386754	0.362759	CDH5	1
GO:2000114	regulation of establishment of cell polarity	1/107	23/18986	0.0434783	7.71475	2.42576	0.121961	0.386754	0.362759	CDH5	1
GO:0001938	positive regulation of endothelial cell proliferation	2/107	107/18986	0.0186916	3.31662	1.80911	0.122148	0.386754	0.362759	THBS4/BMP6	2
GO:0003012	muscle system process	5/107	465/18986	0.0107527	1.90795	1.49232	0.122479	0.386754	0.362759	CALD1/SSTR2/KLF15/NMUR2/CASQ2	5
GO:0007631	feeding behavior	2/107	108/18986	0.0185185	3.28591	1.7935	0.124016	0.386754	0.362759	NMUR2/TRH	2
GO:0019217	regulation of fatty acid metabolic process	2/107	108/18986	0.0185185	3.28591	1.7935	0.124016	0.386754	0.362759	IRS2/FABP5	2
GO:0042472	inner ear morphogenesis	2/107	108/18986	0.0185185	3.28591	1.7935	0.124016	0.386754	0.362759	ZEB1/CLRN1	2
GO:1990266	neutrophil migration	2/107	108/18986	0.0185185	3.28591	1.7935	0.124016	0.386754	0.362759	THBS4/SAA1	2
GO:0044706	multi-multicellular organism process	3/107	218/18986	0.0137615	2.44182	1.6119	0.125291	0.386754	0.362759	ARHGDIB/HPGD/CLIC5	3
GO:0006939	smooth muscle contraction	2/107	109/18986	0.0183486	3.25577	1.77807	0.12589	0.386754	0.362759	SSTR2/NMUR2	2
GO:0045088	regulation of innate immune response	5/107	470/18986	0.0106383	1.88765	1.46698	0.126528	0.386754	0.362759	PRKCE/FGR/IL12A/CALHM6/COLEC12	5
GO:0002064	epithelial cell development	3/107	219/18986	0.0136986	2.43067	1.60315	0.126539	0.386754	0.362759	CDH5/BMP6/INSM1	3
GO:0050866	negative regulation of cell activation	3/107	219/18986	0.0136986	2.43067	1.60315	0.126539	0.386754	0.362759	INHBA/FGR/C1QTNF1	3
GO:0070661	leukocyte proliferation	4/107	341/18986	0.0117302	2.0814	1.51701	0.126806	0.386754	0.362759	IRS2/LMO1/IL12A/CR2	4
GO:0002407	dendritic cell chemotaxis	1/107	24/18986	0.0416667	7.3933	2.35937	0.126915	0.386754	0.362759	IL12A	1
GO:0009074	aromatic amino acid family catabolic process	1/107	24/18986	0.0416667	7.3933	2.35937	0.126915	0.386754	0.362759	UROC1	1
GO:0010839	negative regulation of keratinocyte proliferation	1/107	24/18986	0.0416667	7.3933	2.35937	0.126915	0.386754	0.362759	ZEB1	1
GO:0014821	phasic smooth muscle contraction	1/107	24/18986	0.0416667	7.3933	2.35937	0.126915	0.386754	0.362759	SSTR2	1
GO:0015867	ATP transport	1/107	24/18986	0.0416667	7.3933	2.35937	0.126915	0.386754	0.362759	CALHM6	1
GO:0030277	maintenance of gastrointestinal epithelium	1/107	24/18986	0.0416667	7.3933	2.35937	0.126915	0.386754	0.362759	IL10RA	1
GO:0030539	male genitalia development	1/107	24/18986	0.0416667	7.3933	2.35937	0.126915	0.386754	0.362759	BMP6	1
GO:0033762	response to glucagon	1/107	24/18986	0.0416667	7.3933	2.35937	0.126915	0.386754	0.362759	GLP2R	1
GO:0035357	peroxisome proliferator activated receptor signaling pathway	1/107	24/18986	0.0416667	7.3933	2.35937	0.126915	0.386754	0.362759	FABP5	1
GO:0042438	melanin biosynthetic process	1/107	24/18986	0.0416667	7.3933	2.35937	0.126915	0.386754	0.362759	CITED1	1
GO:0046885	regulation of hormone biosynthetic process	1/107	24/18986	0.0416667	7.3933	2.35937	0.126915	0.386754	0.362759	BMP6	1
GO:0051957	positive regulation of amino acid transport	1/107	24/18986	0.0416667	7.3933	2.35937	0.126915	0.386754	0.362759	TRH	1
GO:0061162	establishment of monopolar cell polarity	1/107	24/18986	0.0416667	7.3933	2.35937	0.126915	0.386754	0.362759	FOXF1	1
GO:0072170	metanephric tubule development	1/107	24/18986	0.0416667	7.3933	2.35937	0.126915	0.386754	0.362759	CALB1	1
GO:0072311	glomerular epithelial cell differentiation	1/107	24/18986	0.0416667	7.3933	2.35937	0.126915	0.386754	0.362759	KLF15	1
GO:0090103	cochlea morphogenesis	1/107	24/18986	0.0416667	7.3933	2.35937	0.126915	0.386754	0.362759	ZEB1	1
GO:0019218	regulation of steroid metabolic process	2/107	110/18986	0.0181818	3.22617	1.76282	0.127771	0.386754	0.362759	FGF19/BMP6	2
GO:0060291	long-term synaptic potentiation	2/107	110/18986	0.0181818	3.22617	1.76282	0.127771	0.386754	0.362759	ARC/CALB1	2
GO:0097306	cellular response to alcohol	2/107	110/18986	0.0181818	3.22617	1.76282	0.127771	0.386754	0.362759	PRKCE/INHBA	2
GO:1901890	positive regulation of cell junction assembly	2/107	110/18986	0.0181818	3.22617	1.76282	0.127771	0.386754	0.362759	SYNDIG1/FLRT3	2
GO:0009952	anterior/posterior pattern specification	3/107	220/18986	0.0136364	2.41963	1.59444	0.127792	0.386754	0.362759	ARC/BHLHE41/FOXF1	3
GO:0048167	regulation of synaptic plasticity	3/107	220/18986	0.0136364	2.41963	1.59444	0.127792	0.386754	0.362759	ARC/EGR2/CALB1	3
GO:1902476	chloride transmembrane transport	2/107	112/18986	0.0178571	3.16856	1.73283	0.131553	0.387559	0.363514	NMUR2/CLIC5	2
GO:0010810	regulation of cell-substrate adhesion	3/107	223/18986	0.0134529	2.38708	1.56859	0.131576	0.387559	0.363514	PRKCE/FOXF1/EGFLAM	3
GO:0001919	regulation of receptor recycling	1/107	25/18986	0.04	7.09757	2.2967	0.131842	0.387559	0.363514	PCSK9	1
GO:0006582	melanin metabolic process	1/107	25/18986	0.04	7.09757	2.2967	0.131842	0.387559	0.363514	CITED1	1
GO:0007130	synaptonemal complex assembly	1/107	25/18986	0.04	7.09757	2.2967	0.131842	0.387559	0.363514	TEX15	1
GO:0010561	negative regulation of glycoprotein biosynthetic process	1/107	25/18986	0.04	7.09757	2.2967	0.131842	0.387559	0.363514	HBEGF	1
GO:0010842	retina layer formation	1/107	25/18986	0.04	7.09757	2.2967	0.131842	0.387559	0.363514	CALB1	1
GO:0021884	forebrain neuron development	1/107	25/18986	0.04	7.09757	2.2967	0.131842	0.387559	0.363514	LHX6	1
GO:0030318	melanocyte differentiation	1/107	25/18986	0.04	7.09757	2.2967	0.131842	0.387559	0.363514	CITED1	1
GO:0030859	polarized epithelial cell differentiation	1/107	25/18986	0.04	7.09757	2.2967	0.131842	0.387559	0.363514	FOXF1	1
GO:0035335	peptidyl-tyrosine dephosphorylation	1/107	25/18986	0.04	7.09757	2.2967	0.131842	0.387559	0.363514	DUSP6	1
GO:0042531	positive regulation of tyrosine phosphorylation of STAT protein	1/107	25/18986	0.04	7.09757	2.2967	0.131842	0.387559	0.363514	IL12A	1
GO:0043302	positive regulation of leukocyte degranulation	1/107	25/18986	0.04	7.09757	2.2967	0.131842	0.387559	0.363514	FGR	1
GO:0050961	detection of temperature stimulus involved in sensory perception	1/107	25/18986	0.04	7.09757	2.2967	0.131842	0.387559	0.363514	PRDM12	1
GO:0061339	establishment or maintenance of monopolar cell polarity	1/107	25/18986	0.04	7.09757	2.2967	0.131842	0.387559	0.363514	FOXF1	1
GO:0072243	metanephric nephron epithelium development	1/107	25/18986	0.04	7.09757	2.2967	0.131842	0.387559	0.363514	CALB1	1
GO:0090023	positive regulation of neutrophil chemotaxis	1/107	25/18986	0.04	7.09757	2.2967	0.131842	0.387559	0.363514	THBS4	1
GO:1901983	regulation of protein acetylation	1/107	25/18986	0.04	7.09757	2.2967	0.131842	0.387559	0.363514	KLF15	1
GO:1903306	negative regulation of regulated secretory pathway	1/107	25/18986	0.04	7.09757	2.2967	0.131842	0.387559	0.363514	FOXF1	1
GO:0072330	monocarboxylic acid biosynthetic process	3/107	224/18986	0.0133929	2.37642	1.56006	0.132847	0.389924	0.365732	FABP5/FGF19/ACSM5	3
GO:0007218	neuropeptide signaling pathway	2/107	113/18986	0.0176991	3.14052	1.71809	0.133453	0.389941	0.365747	SSTR2/NMUR2	2
GO:0120034	positive regulation of plasma membrane bounded cell projection assembly	2/107	113/18986	0.0176991	3.14052	1.71809	0.133453	0.389941	0.365747	TENM2/CLRN1	2
GO:1905954	positive regulation of lipid localization	2/107	113/18986	0.0176991	3.14052	1.71809	0.133453	0.389941	0.365747	BMP6/C1QTNF1	2
GO:0032409	regulation of transporter activity	3/107	225/18986	0.0133333	2.36586	1.55159	0.134121	0.390173	0.365965	ARC/CASQ2/PCSK9	3
GO:0007173	epidermal growth factor receptor signaling pathway	2/107	114/18986	0.0175439	3.11297	1.70351	0.13536	0.390173	0.365965	HBEGF/AREG	2
GO:0033559	unsaturated fatty acid metabolic process	2/107	114/18986	0.0175439	3.11297	1.70351	0.13536	0.390173	0.365965	FABP5/HPGD	2
GO:0001783	B cell apoptotic process	1/107	26/18986	0.0384615	6.82459	2.23738	0.136741	0.390173	0.365965	IRS2	1
GO:0006063	uronic acid metabolic process	1/107	26/18986	0.0384615	6.82459	2.23738	0.136741	0.390173	0.365965	PRKCE	1
GO:0008045	motor neuron axon guidance	1/107	26/18986	0.0384615	6.82459	2.23738	0.136741	0.390173	0.365965	EGR2	1
GO:0019585	glucuronate metabolic process	1/107	26/18986	0.0384615	6.82459	2.23738	0.136741	0.390173	0.365965	PRKCE	1
GO:0032878	regulation of establishment or maintenance of cell polarity	1/107	26/18986	0.0384615	6.82459	2.23738	0.136741	0.390173	0.365965	CDH5	1
GO:0033598	mammary gland epithelial cell proliferation	1/107	26/18986	0.0384615	6.82459	2.23738	0.136741	0.390173	0.365965	AREG	1
GO:0034138	toll-like receptor 3 signaling pathway	1/107	26/18986	0.0384615	6.82459	2.23738	0.136741	0.390173	0.365965	COLEC12	1
GO:0036315	cellular response to sterol	1/107	26/18986	0.0384615	6.82459	2.23738	0.136741	0.390173	0.365965	INHBA	1
GO:0044550	secondary metabolite biosynthetic process	1/107	26/18986	0.0384615	6.82459	2.23738	0.136741	0.390173	0.365965	CITED1	1
GO:0048596	embryonic camera-type eye morphogenesis	1/107	26/18986	0.0384615	6.82459	2.23738	0.136741	0.390173	0.365965	ZEB1	1
GO:0099149	regulation of postsynaptic neurotransmitter receptor internalization	1/107	26/18986	0.0384615	6.82459	2.23738	0.136741	0.390173	0.365965	ARC	1
GO:1903588	negative regulation of blood vessel endothelial cell proliferation involved in sprouting angiogenesis	1/107	26/18986	0.0384615	6.82459	2.23738	0.136741	0.390173	0.365965	IL12A	1
GO:2000273	positive regulation of signaling receptor activity	1/107	26/18986	0.0384615	6.82459	2.23738	0.136741	0.390173	0.365965	ARC	1
GO:0071222	cellular response to lipopolysaccharide	3/107	228/18986	0.0131579	2.33473	1.52642	0.137971	0.393106	0.368717	PRKCE/BMP6/IL24	3
GO:0002443	leukocyte mediated immunity	5/107	485/18986	0.0103093	1.82927	1.39276	0.13904	0.393684	0.369258	FGR/IL12A/FOXF1/CALHM6/CR2	5
GO:0002444	myeloid leukocyte mediated immunity	2/107	116/18986	0.0172414	3.0593	1.67483	0.139193	0.393684	0.369258	FGR/FOXF1	2
GO:0034765	regulation of monoatomic ion transmembrane transport	4/107	354/18986	0.0112994	2.00496	1.43691	0.139747	0.393684	0.369258	PRKCE/ARC/CASQ2/PCSK9	4
GO:0002837	regulation of immune response to tumor cell	1/107	27/18986	0.037037	6.57182	2.18112	0.141613	0.393684	0.369258	IL12A	1
GO:0010893	positive regulation of steroid biosynthetic process	1/107	27/18986	0.037037	6.57182	2.18112	0.141613	0.393684	0.369258	BMP6	1
GO:0016540	protein autoprocessing	1/107	27/18986	0.037037	6.57182	2.18112	0.141613	0.393684	0.369258	PCSK9	1
GO:0019755	one-carbon compound transport	1/107	27/18986	0.037037	6.57182	2.18112	0.141613	0.393684	0.369258	SLC14A2	1
GO:0021895	cerebral cortex neuron differentiation	1/107	27/18986	0.037037	6.57182	2.18112	0.141613	0.393684	0.369258	LHX6	1
GO:0030325	adrenal gland development	1/107	27/18986	0.037037	6.57182	2.18112	0.141613	0.393684	0.369258	INSM1	1
GO:0032967	positive regulation of collagen biosynthetic process	1/107	27/18986	0.037037	6.57182	2.18112	0.141613	0.393684	0.369258	INHBA	1
GO:0035313	wound healing, spreading of epidermal cells	1/107	27/18986	0.037037	6.57182	2.18112	0.141613	0.393684	0.369258	HBEGF	1
GO:0043043	peptide biosynthetic process	1/107	27/18986	0.037037	6.57182	2.18112	0.141613	0.393684	0.369258	CHAC2	1
GO:0045649	regulation of macrophage differentiation	1/107	27/18986	0.037037	6.57182	2.18112	0.141613	0.393684	0.369258	INHBA	1
GO:0051953	negative regulation of amine transport	1/107	27/18986	0.037037	6.57182	2.18112	0.141613	0.393684	0.369258	TRH	1
GO:0071624	positive regulation of granulocyte chemotaxis	1/107	27/18986	0.037037	6.57182	2.18112	0.141613	0.393684	0.369258	THBS4	1
GO:0072010	glomerular epithelium development	1/107	27/18986	0.037037	6.57182	2.18112	0.141613	0.393684	0.369258	KLF15	1
GO:1901017	negative regulation of potassium ion transmembrane transporter activity	1/107	27/18986	0.037037	6.57182	2.18112	0.141613	0.393684	0.369258	CASQ2	1
GO:0048705	skeletal system morphogenesis	3/107	232/18986	0.012931	2.29447	1.49347	0.143162	0.396392	0.371799	ZEB1/FGR/BMP6	3
GO:0016049	cell growth	5/107	490/18986	0.0102041	1.8106	1.3686	0.14333	0.396392	0.371799	FLRT3/INHBA/HBEGF/FLRT1/NPR1	5
GO:0006936	muscle contraction	4/107	358/18986	0.0111732	1.98256	1.41295	0.143833	0.396392	0.371799	CALD1/SSTR2/NMUR2/CASQ2	4
GO:0007596	blood coagulation	3/107	234/18986	0.0128205	2.27486	1.47725	0.145783	0.396392	0.371799	C1QTNF1/SAA1/SERPINC1	3
GO:0002834	regulation of response to tumor cell	1/107	28/18986	0.0357143	6.33712	2.12763	0.146457	0.396392	0.371799	IL12A	1
GO:0010592	positive regulation of lamellipodium assembly	1/107	28/18986	0.0357143	6.33712	2.12763	0.146457	0.396392	0.371799	CLRN1	1
GO:0010714	positive regulation of collagen metabolic process	1/107	28/18986	0.0357143	6.33712	2.12763	0.146457	0.396392	0.371799	INHBA	1
GO:0010882	regulation of cardiac muscle contraction by calcium ion signaling	1/107	28/18986	0.0357143	6.33712	2.12763	0.146457	0.396392	0.371799	CASQ2	1
GO:0016048	detection of temperature stimulus	1/107	28/18986	0.0357143	6.33712	2.12763	0.146457	0.396392	0.371799	PRDM12	1
GO:0021544	subpallium development	1/107	28/18986	0.0357143	6.33712	2.12763	0.146457	0.396392	0.371799	INHBA	1
GO:0031664	regulation of lipopolysaccharide-mediated signaling pathway	1/107	28/18986	0.0357143	6.33712	2.12763	0.146457	0.396392	0.371799	BMP6	1
GO:0033081	regulation of T cell differentiation in thymus	1/107	28/18986	0.0357143	6.33712	2.12763	0.146457	0.396392	0.371799	ZEB1	1
GO:0034698	response to gonadotropin	1/107	28/18986	0.0357143	6.33712	2.12763	0.146457	0.396392	0.371799	INHBA	1
GO:0044342	type B pancreatic cell proliferation	1/107	28/18986	0.0357143	6.33712	2.12763	0.146457	0.396392	0.371799	IRS2	1
GO:0060117	auditory receptor cell development	1/107	28/18986	0.0357143	6.33712	2.12763	0.146457	0.396392	0.371799	CLRN1	1
GO:0060586	multicellular organismal-level iron ion homeostasis	1/107	28/18986	0.0357143	6.33712	2.12763	0.146457	0.396392	0.371799	BMP6	1
GO:0070193	synaptonemal complex organization	1/107	28/18986	0.0357143	6.33712	2.12763	0.146457	0.396392	0.371799	TEX15	1
GO:0072207	metanephric epithelium development	1/107	28/18986	0.0357143	6.33712	2.12763	0.146457	0.396392	0.371799	CALB1	1
GO:1903019	negative regulation of glycoprotein metabolic process	1/107	28/18986	0.0357143	6.33712	2.12763	0.146457	0.396392	0.371799	HBEGF	1
GO:0019722	calcium-mediated signaling	3/107	235/18986	0.012766	2.26518	1.4692	0.147099	0.397575	0.372908	CALCR/NMUR2/CASQ2	3
GO:0007411	axon guidance	3/107	236/18986	0.0127119	2.25558	1.4612	0.148419	0.399109	0.374347	FLRT3/EGR2/CRPPA	3
GO:0097191	extrinsic apoptotic signaling pathway	3/107	236/18986	0.0127119	2.25558	1.4612	0.148419	0.399109	0.374347	INHBA/IL12A/TNFSF15	3
GO:0097485	neuron projection guidance	3/107	237/18986	0.0126582	2.24607	1.45323	0.149742	0.399109	0.374347	FLRT3/EGR2/CRPPA	3
GO:0019318	hexose metabolic process	3/107	238/18986	0.012605	2.23663	1.4453	0.15107	0.399109	0.374347	IRS2/FABP5/C1QTNF1	3
GO:0060560	developmental growth involved in morphogenesis	3/107	238/18986	0.012605	2.23663	1.4453	0.15107	0.399109	0.374347	FLRT3/FLRT1/AREG	3
GO:0045785	positive regulation of cell adhesion	5/107	499/18986	0.01002	1.77795	1.32579	0.151195	0.399109	0.374347	PRKCE/IL12A/FOXF1/SAA1/EGFLAM	5
GO:0002092	positive regulation of receptor internalization	1/107	29/18986	0.0344828	6.11859	2.07669	0.151275	0.399109	0.374347	PCSK9	1
GO:0003401	axis elongation	1/107	29/18986	0.0344828	6.11859	2.07669	0.151275	0.399109	0.374347	AREG	1
GO:0006656	phosphatidylcholine biosynthetic process	1/107	29/18986	0.0344828	6.11859	2.07669	0.151275	0.399109	0.374347	FABP5	1
GO:0006910	phagocytosis, recognition	1/107	29/18986	0.0344828	6.11859	2.07669	0.151275	0.399109	0.374347	COLEC12	1
GO:0008299	isoprenoid biosynthetic process	1/107	29/18986	0.0344828	6.11859	2.07669	0.151275	0.399109	0.374347	CRPPA	1
GO:0010039	response to iron ion	1/107	29/18986	0.0344828	6.11859	2.07669	0.151275	0.399109	0.374347	BMP6	1
GO:0015721	bile acid and bile salt transport	1/107	29/18986	0.0344828	6.11859	2.07669	0.151275	0.399109	0.374347	SLCO2B1	1
GO:0031579	membrane raft organization	1/107	29/18986	0.0344828	6.11859	2.07669	0.151275	0.399109	0.374347	COLEC12	1
GO:0032801	receptor catabolic process	1/107	29/18986	0.0344828	6.11859	2.07669	0.151275	0.399109	0.374347	PCSK9	1
GO:0034695	response to prostaglandin E	1/107	29/18986	0.0344828	6.11859	2.07669	0.151275	0.399109	0.374347	PRKCE	1
GO:0045954	positive regulation of natural killer cell mediated cytotoxicity	1/107	29/18986	0.0344828	6.11859	2.07669	0.151275	0.399109	0.374347	IL12A	1
GO:0002009	morphogenesis of an epithelium	5/107	500/18986	0.01	1.77439	1.32109	0.15208	0.399109	0.374347	FLRT3/HBEGF/AREG/CITED1/FOXF1	5
GO:0006909	phagocytosis	3/107	239/18986	0.0125523	2.22727	1.43741	0.152402	0.399109	0.374347	PRKCE/FGR/COLEC12	3
GO:0030595	leukocyte chemotaxis	3/107	240/18986	0.0125	2.21799	1.42956	0.153737	0.399109	0.374347	THBS4/IL12A/SAA1	3
GO:0050670	regulation of lymphocyte proliferation	3/107	240/18986	0.0125	2.21799	1.42956	0.153737	0.399109	0.374347	IRS2/LMO1/IL12A	3
GO:0006690	icosanoid metabolic process	2/107	124/18986	0.016129	2.86192	1.56598	0.154749	0.399109	0.374347	FABP5/HPGD	2
GO:0030510	regulation of BMP signaling pathway	2/107	124/18986	0.016129	2.86192	1.56598	0.154749	0.399109	0.374347	CDH5/BMPER	2
GO:0031644	regulation of nervous system process	2/107	124/18986	0.016129	2.86192	1.56598	0.154749	0.399109	0.374347	FABP5/EGR2	2
GO:0032609	type II interferon production	2/107	124/18986	0.016129	2.86192	1.56598	0.154749	0.399109	0.374347	INHBA/IL12A	2
GO:0032649	regulation of type II interferon production	2/107	124/18986	0.016129	2.86192	1.56598	0.154749	0.399109	0.374347	INHBA/IL12A	2
GO:0007599	hemostasis	3/107	241/18986	0.0124481	2.20879	1.42175	0.155076	0.399109	0.374347	C1QTNF1/SAA1/SERPINC1	3
GO:0050817	coagulation	3/107	241/18986	0.0124481	2.20879	1.42175	0.155076	0.399109	0.374347	C1QTNF1/SAA1/SERPINC1	3
GO:0007588	excretion	1/107	30/18986	0.0333333	5.91464	2.02809	0.156065	0.399109	0.374347	NPR1	1
GO:0010894	negative regulation of steroid biosynthetic process	1/107	30/18986	0.0333333	5.91464	2.02809	0.156065	0.399109	0.374347	FGF19	1
GO:0015732	prostaglandin transport	1/107	30/18986	0.0333333	5.91464	2.02809	0.156065	0.399109	0.374347	SLCO2B1	1
GO:0042509	regulation of tyrosine phosphorylation of STAT protein	1/107	30/18986	0.0333333	5.91464	2.02809	0.156065	0.399109	0.374347	IL12A	1
GO:0050482	arachidonate secretion	1/107	30/18986	0.0333333	5.91464	2.02809	0.156065	0.399109	0.374347	NMUR2	1
GO:0060441	epithelial tube branching involved in lung morphogenesis	1/107	30/18986	0.0333333	5.91464	2.02809	0.156065	0.399109	0.374347	FOXF1	1
GO:0062149	detection of stimulus involved in sensory perception of pain	1/107	30/18986	0.0333333	5.91464	2.02809	0.156065	0.399109	0.374347	PRDM12	1
GO:0090330	regulation of platelet aggregation	1/107	30/18986	0.0333333	5.91464	2.02809	0.156065	0.399109	0.374347	C1QTNF1	1
GO:1900746	regulation of vascular endothelial growth factor signaling pathway	1/107	30/18986	0.0333333	5.91464	2.02809	0.156065	0.399109	0.374347	IL12A	1
GO:1902932	positive regulation of alcohol biosynthetic process	1/107	30/18986	0.0333333	5.91464	2.02809	0.156065	0.399109	0.374347	BMP6	1
GO:1903672	positive regulation of sprouting angiogenesis	1/107	30/18986	0.0333333	5.91464	2.02809	0.156065	0.399109	0.374347	BMPER	1
GO:1903963	arachidonate transport	1/107	30/18986	0.0333333	5.91464	2.02809	0.156065	0.399109	0.374347	NMUR2	1
GO:0071219	cellular response to molecule of bacterial origin	3/107	242/18986	0.0123967	2.19966	1.41398	0.156419	0.399109	0.374347	PRKCE/BMP6/IL24	3
GO:1903305	regulation of regulated secretory pathway	2/107	125/18986	0.016	2.83903	1.55299	0.156717	0.399109	0.374347	FGR/FOXF1	2
GO:0009743	response to carbohydrate	3/107	243/18986	0.0123457	2.19061	1.40624	0.157765	0.399109	0.374347	PRKCE/IRS2/COLEC12	3
GO:0002688	regulation of leukocyte chemotaxis	2/107	126/18986	0.015873	2.8165	1.54013	0.15869	0.399109	0.374347	THBS4/IL12A	2
GO:0021761	limbic system development	2/107	126/18986	0.015873	2.8165	1.54013	0.15869	0.399109	0.374347	SOX3/OTP	2
GO:0032944	regulation of mononuclear cell proliferation	3/107	245/18986	0.0122449	2.17273	1.39088	0.160469	0.399109	0.374347	IRS2/LMO1/IL12A	3
GO:0001516	prostaglandin biosynthetic process	1/107	31/18986	0.0322581	5.72385	1.98163	0.160829	0.399109	0.374347	FABP5	1
GO:0003338	metanephros morphogenesis	1/107	31/18986	0.0322581	5.72385	1.98163	0.160829	0.399109	0.374347	CALB1	1
GO:0006359	regulation of transcription by RNA polymerase III	1/107	31/18986	0.0322581	5.72385	1.98163	0.160829	0.399109	0.374347	INHBA	1
GO:0008209	androgen metabolic process	1/107	31/18986	0.0322581	5.72385	1.98163	0.160829	0.399109	0.374347	INHBA	1
GO:0014047	glutamate secretion	1/107	31/18986	0.0322581	5.72385	1.98163	0.160829	0.399109	0.374347	TRH	1
GO:0021602	cranial nerve morphogenesis	1/107	31/18986	0.0322581	5.72385	1.98163	0.160829	0.399109	0.374347	EGR2	1
GO:0032372	negative regulation of sterol transport	1/107	31/18986	0.0322581	5.72385	1.98163	0.160829	0.399109	0.374347	PCSK9	1
GO:0032375	negative regulation of cholesterol transport	1/107	31/18986	0.0322581	5.72385	1.98163	0.160829	0.399109	0.374347	PCSK9	1
GO:0036336	dendritic cell migration	1/107	31/18986	0.0322581	5.72385	1.98163	0.160829	0.399109	0.374347	IL12A	1
GO:0040018	positive regulation of multicellular organism growth	1/107	31/18986	0.0322581	5.72385	1.98163	0.160829	0.399109	0.374347	FOXS1	1
GO:0046457	prostanoid biosynthetic process	1/107	31/18986	0.0322581	5.72385	1.98163	0.160829	0.399109	0.374347	FABP5	1
GO:0050951	sensory perception of temperature stimulus	1/107	31/18986	0.0322581	5.72385	1.98163	0.160829	0.399109	0.374347	PRDM12	1
GO:0051491	positive regulation of filopodium assembly	1/107	31/18986	0.0322581	5.72385	1.98163	0.160829	0.399109	0.374347	TENM2	1
GO:0070723	response to cholesterol	1/107	31/18986	0.0322581	5.72385	1.98163	0.160829	0.399109	0.374347	INHBA	1
GO:0086019	cell-cell signaling involved in cardiac conduction	1/107	31/18986	0.0322581	5.72385	1.98163	0.160829	0.399109	0.374347	CASQ2	1
GO:1901020	negative regulation of calcium ion transmembrane transporter activity	1/107	31/18986	0.0322581	5.72385	1.98163	0.160829	0.399109	0.374347	CASQ2	1
GO:0002698	negative regulation of immune effector process	2/107	128/18986	0.015625	2.77249	1.51478	0.16265	0.399109	0.374347	FOXF1/CR2	2
GO:0006821	chloride transport	2/107	128/18986	0.015625	2.77249	1.51478	0.16265	0.399109	0.374347	NMUR2/CLIC5	2
GO:0030282	bone mineralization	2/107	128/18986	0.015625	2.77249	1.51478	0.16265	0.399109	0.374347	FGR/BMP6	2
GO:0048259	regulation of receptor-mediated endocytosis	2/107	128/18986	0.015625	2.77249	1.51478	0.16265	0.399109	0.374347	ARC/PCSK9	2
GO:0002274	myeloid leukocyte activation	3/107	247/18986	0.0121457	2.15513	1.37567	0.163187	0.399109	0.374347	PRKCE/FGR/FOXF1	3
GO:0007613	memory	2/107	129/18986	0.0155039	2.751	1.50228	0.164637	0.399109	0.374347	ARC/CALB1	2
GO:0042471	ear morphogenesis	2/107	129/18986	0.0155039	2.751	1.50228	0.164637	0.399109	0.374347	ZEB1/CLRN1	2
GO:0043200	response to amino acid	2/107	129/18986	0.0155039	2.751	1.50228	0.164637	0.399109	0.374347	ZEB1/STAMBPL1	2
GO:0051209	release of sequestered calcium ion into cytosol	2/107	129/18986	0.0155039	2.751	1.50228	0.164637	0.399109	0.374347	PRKCE/CASQ2	2
GO:0071621	granulocyte chemotaxis	2/107	129/18986	0.0155039	2.751	1.50228	0.164637	0.399109	0.374347	THBS4/SAA1	2
GO:0001958	endochondral ossification	1/107	32/18986	0.03125	5.54498	1.93715	0.165566	0.399109	0.374347	BMP6	1
GO:0003299	muscle hypertrophy in response to stress	1/107	32/18986	0.03125	5.54498	1.93715	0.165566	0.399109	0.374347	KLF15	1
GO:0005979	regulation of glycogen biosynthetic process	1/107	32/18986	0.03125	5.54498	1.93715	0.165566	0.399109	0.374347	IRS2	1
GO:0010644	cell communication by electrical coupling	1/107	32/18986	0.03125	5.54498	1.93715	0.165566	0.399109	0.374347	CASQ2	1
GO:0010962	regulation of glucan biosynthetic process	1/107	32/18986	0.03125	5.54498	1.93715	0.165566	0.399109	0.374347	IRS2	1
GO:0014887	cardiac muscle adaptation	1/107	32/18986	0.03125	5.54498	1.93715	0.165566	0.399109	0.374347	KLF15	1
GO:0014898	cardiac muscle hypertrophy in response to stress	1/107	32/18986	0.03125	5.54498	1.93715	0.165566	0.399109	0.374347	KLF15	1
GO:0021532	neural tube patterning	1/107	32/18986	0.03125	5.54498	1.93715	0.165566	0.399109	0.374347	DZIP1L	1
GO:0036075	replacement ossification	1/107	32/18986	0.03125	5.54498	1.93715	0.165566	0.399109	0.374347	BMP6	1
GO:0042219	cellular modified amino acid catabolic process	1/107	32/18986	0.03125	5.54498	1.93715	0.165566	0.399109	0.374347	CHAC2	1
GO:0045940	positive regulation of steroid metabolic process	1/107	32/18986	0.03125	5.54498	1.93715	0.165566	0.399109	0.374347	BMP6	1
GO:0060603	mammary gland duct morphogenesis	1/107	32/18986	0.03125	5.54498	1.93715	0.165566	0.399109	0.374347	AREG	1
GO:0061036	positive regulation of cartilage development	1/107	32/18986	0.03125	5.54498	1.93715	0.165566	0.399109	0.374347	BMP6	1
GO:1901380	negative regulation of potassium ion transmembrane transport	1/107	32/18986	0.03125	5.54498	1.93715	0.165566	0.399109	0.374347	CASQ2	1
GO:1902547	regulation of cellular response to vascular endothelial growth factor stimulus	1/107	32/18986	0.03125	5.54498	1.93715	0.165566	0.399109	0.374347	IL12A	1
GO:0016054	organic acid catabolic process	3/107	249/18986	0.0120482	2.13782	1.3606	0.165919	0.399109	0.374347	IRS2/NPL/UROC1	3
GO:0046395	carboxylic acid catabolic process	3/107	249/18986	0.0120482	2.13782	1.3606	0.165919	0.399109	0.374347	IRS2/NPL/UROC1	3
GO:0050830	defense response to Gram-positive bacterium	2/107	130/18986	0.0153846	2.72983	1.48991	0.166628	0.399824	0.375017	FGR/IL12A	2
GO:0051283	negative regulation of sequestering of calcium ion	2/107	130/18986	0.0153846	2.72983	1.48991	0.166628	0.399824	0.375017	PRKCE/CASQ2	2
GO:0030072	peptide hormone secretion	3/107	250/18986	0.012	2.12927	1.35312	0.167291	0.40092	0.376046	PRKCE/IRS2/TRH	3
GO:0006814	sodium ion transport	3/107	251/18986	0.0119522	2.12079	1.34568	0.168665	0.402462	0.377492	PRKCE/SLC6A19/PCSK9	3
GO:0010880	regulation of release of sequestered calcium ion into cytosol by sarcoplasmic reticulum	1/107	33/18986	0.030303	5.37695	1.89451	0.170277	0.402462	0.377492	CASQ2	1
GO:0010996	response to auditory stimulus	1/107	33/18986	0.030303	5.37695	1.89451	0.170277	0.402462	0.377492	CALB1	1
GO:0030511	positive regulation of transforming growth factor beta receptor signaling pathway	1/107	33/18986	0.030303	5.37695	1.89451	0.170277	0.402462	0.377492	CITED1	1
GO:0045648	positive regulation of erythrocyte differentiation	1/107	33/18986	0.030303	5.37695	1.89451	0.170277	0.402462	0.377492	INHBA	1
GO:0048566	embryonic digestive tract development	1/107	33/18986	0.030303	5.37695	1.89451	0.170277	0.402462	0.377492	FOXF1	1
GO:0050869	negative regulation of B cell activation	1/107	33/18986	0.030303	5.37695	1.89451	0.170277	0.402462	0.377492	INHBA	1
GO:0090322	regulation of superoxide metabolic process	1/107	33/18986	0.030303	5.37695	1.89451	0.170277	0.402462	0.377492	PRKCE	1
GO:0099560	synaptic membrane adhesion	1/107	33/18986	0.030303	5.37695	1.89451	0.170277	0.402462	0.377492	FLRT3	1
GO:1903846	positive regulation of cellular response to transforming growth factor beta stimulus	1/107	33/18986	0.030303	5.37695	1.89451	0.170277	0.402462	0.377492	CITED1	1
GO:0001704	formation of primary germ layer	2/107	132/18986	0.0151515	2.68847	1.4655	0.170622	0.402462	0.377492	INHBA/FOXF1	2
GO:0007259	cell surface receptor signaling pathway via JAK-STAT	2/107	132/18986	0.0151515	2.68847	1.4655	0.170622	0.402462	0.377492	IL12A/IL10RA	2
GO:0051282	regulation of sequestering of calcium ion	2/107	132/18986	0.0151515	2.68847	1.4655	0.170622	0.402462	0.377492	PRKCE/CASQ2	2
GO:0014902	myotube differentiation	2/107	133/18986	0.0150376	2.66826	1.45347	0.172626	0.403405	0.378376	ADAM12/BHLHE41	2
GO:0050864	regulation of B cell activation	2/107	133/18986	0.0150376	2.66826	1.45347	0.172626	0.403405	0.378376	IRS2/INHBA	2
GO:0098661	inorganic anion transmembrane transport	2/107	133/18986	0.0150376	2.66826	1.45347	0.172626	0.403405	0.378376	NMUR2/CLIC5	2
GO:0002418	immune response to tumor cell	1/107	34/18986	0.0294118	5.2188	1.85357	0.174961	0.403405	0.378376	IL12A	1
GO:0002862	negative regulation of inflammatory response to antigenic stimulus	1/107	34/18986	0.0294118	5.2188	1.85357	0.174961	0.403405	0.378376	FGR	1
GO:0006536	glutamate metabolic process	1/107	34/18986	0.0294118	5.2188	1.85357	0.174961	0.403405	0.378376	UROC1	1
GO:0007628	adult walking behavior	1/107	34/18986	0.0294118	5.2188	1.85357	0.174961	0.403405	0.378376	TRH	1
GO:0009112	nucleobase metabolic process	1/107	34/18986	0.0294118	5.2188	1.85357	0.174961	0.403405	0.378376	TTR	1
GO:0032367	intracellular cholesterol transport	1/107	34/18986	0.0294118	5.2188	1.85357	0.174961	0.403405	0.378376	PCSK9	1
GO:0034383	low-density lipoprotein particle clearance	1/107	34/18986	0.0294118	5.2188	1.85357	0.174961	0.403405	0.378376	PCSK9	1
GO:0045939	negative regulation of steroid metabolic process	1/107	34/18986	0.0294118	5.2188	1.85357	0.174961	0.403405	0.378376	FGF19	1
GO:0046320	regulation of fatty acid oxidation	1/107	34/18986	0.0294118	5.2188	1.85357	0.174961	0.403405	0.378376	IRS2	1
GO:0051450	myoblast proliferation	1/107	34/18986	0.0294118	5.2188	1.85357	0.174961	0.403405	0.378376	FGR	1
GO:0060292	long-term synaptic depression	1/107	34/18986	0.0294118	5.2188	1.85357	0.174961	0.403405	0.378376	ARC	1
GO:0090022	regulation of neutrophil chemotaxis	1/107	34/18986	0.0294118	5.2188	1.85357	0.174961	0.403405	0.378376	THBS4	1
GO:0090162	establishment of epithelial cell polarity	1/107	34/18986	0.0294118	5.2188	1.85357	0.174961	0.403405	0.378376	FOXF1	1
GO:0098884	postsynaptic neurotransmitter receptor internalization	1/107	34/18986	0.0294118	5.2188	1.85357	0.174961	0.403405	0.378376	ARC	1
GO:0140239	postsynaptic endocytosis	1/107	34/18986	0.0294118	5.2188	1.85357	0.174961	0.403405	0.378376	ARC	1
GO:2000191	regulation of fatty acid transport	1/107	34/18986	0.0294118	5.2188	1.85357	0.174961	0.403405	0.378376	IRS2	1
GO:0042326	negative regulation of phosphorylation	3/107	256/18986	0.0117188	2.07937	1.30896	0.175587	0.404371	0.379282	IRS2/INHBA/INSM1	3
GO:0046683	response to organophosphorus	2/107	135/18986	0.0148148	2.62873	1.42974	0.176644	0.406324	0.381114	AREG/CITED1	2
GO:0002790	peptide secretion	3/107	257/18986	0.0116732	2.07128	1.30172	0.176982	0.406619	0.381391	PRKCE/IRS2/TRH	3
GO:0038127	ERBB signaling pathway	2/107	136/18986	0.0147059	2.6094	1.41803	0.178659	0.407863	0.382558	HBEGF/AREG	2
GO:0048593	camera-type eye morphogenesis	2/107	136/18986	0.0147059	2.6094	1.41803	0.178659	0.407863	0.382558	ZEB1/CALB1	2
GO:0051208	sequestering of calcium ion	2/107	136/18986	0.0147059	2.6094	1.41803	0.178659	0.407863	0.382558	PRKCE/CASQ2	2
GO:0002717	positive regulation of natural killer cell mediated immunity	1/107	35/18986	0.0285714	5.06969	1.81421	0.179619	0.407863	0.382558	IL12A	1
GO:0007260	tyrosine phosphorylation of STAT protein	1/107	35/18986	0.0285714	5.06969	1.81421	0.179619	0.407863	0.382558	IL12A	1
GO:0031646	positive regulation of nervous system process	1/107	35/18986	0.0285714	5.06969	1.81421	0.179619	0.407863	0.382558	EGR2	1
GO:0045577	regulation of B cell differentiation	1/107	35/18986	0.0285714	5.06969	1.81421	0.179619	0.407863	0.382558	INHBA	1
GO:0048048	embryonic eye morphogenesis	1/107	35/18986	0.0285714	5.06969	1.81421	0.179619	0.407863	0.382558	ZEB1	1
GO:1902624	positive regulation of neutrophil migration	1/107	35/18986	0.0285714	5.06969	1.81421	0.179619	0.407863	0.382558	THBS4	1
GO:2000649	regulation of sodium ion transmembrane transporter activity	1/107	35/18986	0.0285714	5.06969	1.81421	0.179619	0.407863	0.382558	PCSK9	1
GO:0048565	digestive tract development	2/107	137/18986	0.0145985	2.59035	1.40643	0.180678	0.409789	0.384365	FOXF1/RCBTB2	2
GO:0002456	T cell mediated immunity	2/107	138/18986	0.0144928	2.57158	1.39493	0.1827	0.411656	0.386115	IL12A/CR2	2
GO:0001649	osteoblast differentiation	3/107	262/18986	0.0114504	2.03175	1.266	0.183999	0.411656	0.386115	AREG/BMP6/CITED1	3
GO:0005996	monosaccharide metabolic process	3/107	262/18986	0.0114504	2.03175	1.266	0.183999	0.411656	0.386115	IRS2/FABP5/C1QTNF1	3
GO:0002021	response to dietary excess	1/107	36/18986	0.0277778	4.92887	1.77632	0.184251	0.411656	0.386115	NMUR2	1
GO:0010526	retrotransposon silencing	1/107	36/18986	0.0277778	4.92887	1.77632	0.184251	0.411656	0.386115	TEX15	1
GO:0010984	regulation of lipoprotein particle clearance	1/107	36/18986	0.0277778	4.92887	1.77632	0.184251	0.411656	0.386115	PCSK9	1
GO:0015868	purine ribonucleotide transport	1/107	36/18986	0.0277778	4.92887	1.77632	0.184251	0.411656	0.386115	CALHM6	1
GO:0035640	exploration behavior	1/107	36/18986	0.0277778	4.92887	1.77632	0.184251	0.411656	0.386115	PRKCE	1
GO:0036314	response to sterol	1/107	36/18986	0.0277778	4.92887	1.77632	0.184251	0.411656	0.386115	INHBA	1
GO:0050931	pigment cell differentiation	1/107	36/18986	0.0277778	4.92887	1.77632	0.184251	0.411656	0.386115	CITED1	1
GO:0071353	cellular response to interleukin-4	1/107	36/18986	0.0277778	4.92887	1.77632	0.184251	0.411656	0.386115	IL24	1
GO:1902745	positive regulation of lamellipodium organization	1/107	36/18986	0.0277778	4.92887	1.77632	0.184251	0.411656	0.386115	CLRN1	1
GO:2000352	negative regulation of endothelial cell apoptotic process	1/107	36/18986	0.0277778	4.92887	1.77632	0.184251	0.411656	0.386115	CDH5	1
GO:0090288	negative regulation of cellular response to growth factor stimulus	2/107	139/18986	0.0143885	2.55308	1.38353	0.184726	0.412243	0.386666	IL12A/BMPER	2
GO:0007498	mesoderm development	2/107	140/18986	0.0142857	2.53485	1.37223	0.186754	0.413869	0.388191	INHBA/FOXF1	2
GO:0030168	platelet activation	2/107	141/18986	0.0141844	2.51687	1.36103	0.188786	0.413869	0.388191	C1QTNF1/SAA1	2
GO:0031623	receptor internalization	2/107	141/18986	0.0141844	2.51687	1.36103	0.188786	0.413869	0.388191	ARC/PCSK9	2
GO:0002052	positive regulation of neuroblast proliferation	1/107	37/18986	0.027027	4.79566	1.73981	0.188857	0.413869	0.388191	OTP	1
GO:0003382	epithelial cell morphogenesis	1/107	37/18986	0.027027	4.79566	1.73981	0.188857	0.413869	0.388191	CDH5	1
GO:0010661	positive regulation of muscle cell apoptotic process	1/107	37/18986	0.027027	4.79566	1.73981	0.188857	0.413869	0.388191	IL12A	1
GO:0021799	cerebral cortex radially oriented cell migration	1/107	37/18986	0.027027	4.79566	1.73981	0.188857	0.413869	0.388191	LHX6	1
GO:0031076	embryonic camera-type eye development	1/107	37/18986	0.027027	4.79566	1.73981	0.188857	0.413869	0.388191	ZEB1	1
GO:0032228	regulation of synaptic transmission, GABAergic	1/107	37/18986	0.027027	4.79566	1.73981	0.188857	0.413869	0.388191	PRKCE	1
GO:0032366	intracellular sterol transport	1/107	37/18986	0.027027	4.79566	1.73981	0.188857	0.413869	0.388191	PCSK9	1
GO:0034110	regulation of homotypic cell-cell adhesion	1/107	37/18986	0.027027	4.79566	1.73981	0.188857	0.413869	0.388191	C1QTNF1	1
GO:0034694	response to prostaglandin	1/107	37/18986	0.027027	4.79566	1.73981	0.188857	0.413869	0.388191	PRKCE	1
GO:0045920	negative regulation of exocytosis	1/107	37/18986	0.027027	4.79566	1.73981	0.188857	0.413869	0.388191	FOXF1	1
GO:0048261	negative regulation of receptor-mediated endocytosis	1/107	37/18986	0.027027	4.79566	1.73981	0.188857	0.413869	0.388191	PCSK9	1
GO:0099601	regulation of neurotransmitter receptor activity	1/107	37/18986	0.027027	4.79566	1.73981	0.188857	0.413869	0.388191	ARC	1
GO:1904385	cellular response to angiotensin	1/107	37/18986	0.027027	4.79566	1.73981	0.188857	0.413869	0.388191	INHBA	1
GO:0006986	response to unfolded protein	2/107	143/18986	0.013986	2.48167	1.33891	0.19286	0.417327	0.391435	THBS4/ERP27	2
GO:0018205	peptidyl-lysine modification	2/107	143/18986	0.013986	2.48167	1.33891	0.19286	0.417327	0.391435	EGR2/KLF15	2
GO:0002335	mature B cell differentiation	1/107	38/18986	0.0263158	4.66945	1.70459	0.193437	0.417327	0.391435	CMTM7	1
GO:0006699	bile acid biosynthetic process	1/107	38/18986	0.0263158	4.66945	1.70459	0.193437	0.417327	0.391435	FGF19	1
GO:0008207	C21-steroid hormone metabolic process	1/107	38/18986	0.0263158	4.66945	1.70459	0.193437	0.417327	0.391435	BMP6	1
GO:0010669	epithelial structure maintenance	1/107	38/18986	0.0263158	4.66945	1.70459	0.193437	0.417327	0.391435	IL10RA	1
GO:0014808	release of sequestered calcium ion into cytosol by sarcoplasmic reticulum	1/107	38/18986	0.0263158	4.66945	1.70459	0.193437	0.417327	0.391435	CASQ2	1
GO:0032197	retrotransposition	1/107	38/18986	0.0263158	4.66945	1.70459	0.193437	0.417327	0.391435	TEX15	1
GO:0034391	regulation of smooth muscle cell apoptotic process	1/107	38/18986	0.0263158	4.66945	1.70459	0.193437	0.417327	0.391435	IL12A	1
GO:0042401	biogenic amine biosynthetic process	1/107	38/18986	0.0263158	4.66945	1.70459	0.193437	0.417327	0.391435	INSM1	1
GO:0043267	negative regulation of potassium ion transport	1/107	38/18986	0.0263158	4.66945	1.70459	0.193437	0.417327	0.391435	CASQ2	1
GO:0051385	response to mineralocorticoid	1/107	38/18986	0.0263158	4.66945	1.70459	0.193437	0.417327	0.391435	INHBA	1
GO:0070229	negative regulation of lymphocyte apoptotic process	1/107	38/18986	0.0263158	4.66945	1.70459	0.193437	0.417327	0.391435	IRS2	1
GO:0071392	cellular response to estradiol stimulus	1/107	38/18986	0.0263158	4.66945	1.70459	0.193437	0.417327	0.391435	SSTR2	1
GO:0071216	cellular response to biotic stimulus	3/107	269/18986	0.0111524	1.97888	1.21729	0.193945	0.417959	0.392028	PRKCE/BMP6/IL24	3
GO:0001101	response to acid chemical	2/107	144/18986	0.0138889	2.46443	1.32799	0.194901	0.418266	0.392316	ZEB1/STAMBPL1	2
GO:0009581	detection of external stimulus	2/107	144/18986	0.0138889	2.46443	1.32799	0.194901	0.418266	0.392316	PRDM12/FOXF1	2
GO:0006631	fatty acid metabolic process	4/107	405/18986	0.00987654	1.75249	1.15239	0.195091	0.418266	0.392316	IRS2/FABP5/HPGD/ACSM5	4
GO:0001894	tissue homeostasis	3/107	270/18986	0.0111111	1.97155	1.21045	0.195377	0.418266	0.392316	CDH5/CLRN1/IL10RA	3
GO:0060249	anatomical structure homeostasis	3/107	270/18986	0.0111111	1.97155	1.21045	0.195377	0.418266	0.392316	CDH5/CLRN1/IL10RA	3
GO:0070663	regulation of leukocyte proliferation	3/107	270/18986	0.0111111	1.97155	1.21045	0.195377	0.418266	0.392316	IRS2/LMO1/IL12A	3
GO:0050671	positive regulation of lymphocyte proliferation	2/107	145/18986	0.0137931	2.44744	1.31716	0.196945	0.420166	0.394098	IRS2/IL12A	2
GO:0050921	positive regulation of chemotaxis	2/107	145/18986	0.0137931	2.44744	1.31716	0.196945	0.420166	0.394098	THBS4/IL12A	2
GO:0009309	amine biosynthetic process	1/107	39/18986	0.025641	4.54972	1.67057	0.197992	0.420166	0.394098	INSM1	1
GO:0032350	regulation of hormone metabolic process	1/107	39/18986	0.025641	4.54972	1.67057	0.197992	0.420166	0.394098	BMP6	1
GO:0034390	smooth muscle cell apoptotic process	1/107	39/18986	0.025641	4.54972	1.67057	0.197992	0.420166	0.394098	IL12A	1
GO:0035633	maintenance of blood-brain barrier	1/107	39/18986	0.025641	4.54972	1.67057	0.197992	0.420166	0.394098	CDH5	1
GO:0060122	inner ear receptor cell stereocilium organization	1/107	39/18986	0.025641	4.54972	1.67057	0.197992	0.420166	0.394098	CLRN1	1
GO:0071312	cellular response to alkaloid	1/107	39/18986	0.025641	4.54972	1.67057	0.197992	0.420166	0.394098	CASQ2	1
GO:0001889	liver development	2/107	147/18986	0.0136054	2.41414	1.29578	0.201041	0.422241	0.396044	RCBTB2/PCSK9	2
GO:0007188	adenylate cyclase-modulating G protein-coupled receptor signaling pathway	3/107	274/18986	0.0109489	1.94277	1.18339	0.201132	0.422241	0.396044	GLP2R/SSTR2/CALCR	3
GO:0001654	eye development	4/107	411/18986	0.00973236	1.7269	1.12161	0.202015	0.422241	0.396044	ZEB1/INHBA/BMP6/CALB1	4
GO:0032196	transposition	1/107	40/18986	0.025	4.43598	1.63768	0.202521	0.422241	0.396044	TEX15	1
GO:0032885	regulation of polysaccharide biosynthetic process	1/107	40/18986	0.025	4.43598	1.63768	0.202521	0.422241	0.396044	IRS2	1
GO:0032965	regulation of collagen biosynthetic process	1/107	40/18986	0.025	4.43598	1.63768	0.202521	0.422241	0.396044	INHBA	1
GO:0045923	positive regulation of fatty acid metabolic process	1/107	40/18986	0.025	4.43598	1.63768	0.202521	0.422241	0.396044	IRS2	1
GO:0048536	spleen development	1/107	40/18986	0.025	4.43598	1.63768	0.202521	0.422241	0.396044	RCBTB2	1
GO:0051503	adenine nucleotide transport	1/107	40/18986	0.025	4.43598	1.63768	0.202521	0.422241	0.396044	CALHM6	1
GO:0052652	cyclic purine nucleotide metabolic process	1/107	40/18986	0.025	4.43598	1.63768	0.202521	0.422241	0.396044	NPR1	1
GO:0070873	regulation of glycogen metabolic process	1/107	40/18986	0.025	4.43598	1.63768	0.202521	0.422241	0.396044	IRS2	1
GO:0090659	walking behavior	1/107	40/18986	0.025	4.43598	1.63768	0.202521	0.422241	0.396044	TRH	1
GO:0099590	neurotransmitter receptor internalization	1/107	40/18986	0.025	4.43598	1.63768	0.202521	0.422241	0.396044	ARC	1
GO:1903514	release of sequestered calcium ion into cytosol by endoplasmic reticulum	1/107	40/18986	0.025	4.43598	1.63768	0.202521	0.422241	0.396044	CASQ2	1
GO:0006898	receptor-mediated endocytosis	3/107	275/18986	0.0109091	1.9357	1.17669	0.202577	0.422241	0.396044	ARC/CLEC4M/PCSK9	3
GO:0007224	smoothened signaling pathway	2/107	148/18986	0.0135135	2.39783	1.28521	0.203092	0.422241	0.396044	DZIP1L/FOXF1	2
GO:0032946	positive regulation of mononuclear cell proliferation	2/107	148/18986	0.0135135	2.39783	1.28521	0.203092	0.422241	0.396044	IRS2/IL12A	2
GO:0055123	digestive system development	2/107	148/18986	0.0135135	2.39783	1.28521	0.203092	0.422241	0.396044	FOXF1/RCBTB2	2
GO:0071333	cellular response to glucose stimulus	2/107	148/18986	0.0135135	2.39783	1.28521	0.203092	0.422241	0.396044	PRKCE/IRS2	2
GO:0150063	visual system development	4/107	415/18986	0.00963855	1.71026	1.10136	0.206672	0.42444	0.398106	ZEB1/INHBA/BMP6/CALB1	4
GO:0001916	positive regulation of T cell mediated cytotoxicity	1/107	41/18986	0.0243902	4.32779	1.60586	0.207025	0.42444	0.398106	IL12A	1
GO:0009072	aromatic amino acid metabolic process	1/107	41/18986	0.0243902	4.32779	1.60586	0.207025	0.42444	0.398106	UROC1	1
GO:0009187	cyclic nucleotide metabolic process	1/107	41/18986	0.0243902	4.32779	1.60586	0.207025	0.42444	0.398106	NPR1	1
GO:0010591	regulation of lamellipodium assembly	1/107	41/18986	0.0243902	4.32779	1.60586	0.207025	0.42444	0.398106	CLRN1	1
GO:0010762	regulation of fibroblast migration	1/107	41/18986	0.0243902	4.32779	1.60586	0.207025	0.42444	0.398106	PRKCE	1
GO:0030279	negative regulation of ossification	1/107	41/18986	0.0243902	4.32779	1.60586	0.207025	0.42444	0.398106	CALCR	1
GO:0030513	positive regulation of BMP signaling pathway	1/107	41/18986	0.0243902	4.32779	1.60586	0.207025	0.42444	0.398106	CDH5	1
GO:0042417	dopamine metabolic process	1/107	41/18986	0.0243902	4.32779	1.60586	0.207025	0.42444	0.398106	NPR1	1
GO:0046427	positive regulation of receptor signaling pathway via JAK-STAT	1/107	41/18986	0.0243902	4.32779	1.60586	0.207025	0.42444	0.398106	IL10RA	1
GO:0051954	positive regulation of amine transport	1/107	41/18986	0.0243902	4.32779	1.60586	0.207025	0.42444	0.398106	TRH	1
GO:0071542	dopaminergic neuron differentiation	1/107	41/18986	0.0243902	4.32779	1.60586	0.207025	0.42444	0.398106	OTP	1
GO:0061008	hepaticobiliary system development	2/107	150/18986	0.0133333	2.36586	1.26434	0.207203	0.42444	0.398106	RCBTB2/PCSK9	2
GO:0099175	regulation of postsynapse organization	2/107	150/18986	0.0133333	2.36586	1.26434	0.207203	0.42444	0.398106	SYNDIG1/ARC	2
GO:0002833	positive regulation of response to biotic stimulus	4/107	416/18986	0.00961538	1.70615	1.09634	0.207841	0.425298	0.398911	PRKCE/IL12A/BMP6/COLEC12	4
GO:0071331	cellular response to hexose stimulus	2/107	151/18986	0.013245	2.35019	1.25403	0.209262	0.427308	0.400796	PRKCE/IRS2	2
GO:0098656	monoatomic anion transmembrane transport	2/107	151/18986	0.013245	2.35019	1.25403	0.209262	0.427308	0.400796	NMUR2/CLIC5	2
GO:0098742	cell-cell adhesion via plasma-membrane adhesion molecules	3/107	280/18986	0.0107143	1.90113	1.14363	0.209839	0.4274	0.400883	FLRT3/CDH5/PCDHA4	3
GO:0002687	positive regulation of leukocyte migration	2/107	152/18986	0.0131579	2.33473	1.2438	0.211323	0.4274	0.400883	THBS4/IL12A	2
GO:0006958	complement activation, classical pathway	1/107	42/18986	0.0238095	4.22474	1.57504	0.211504	0.4274	0.400883	CR2	1
GO:0015865	purine nucleotide transport	1/107	42/18986	0.0238095	4.22474	1.57504	0.211504	0.4274	0.400883	CALHM6	1
GO:0044319	wound healing, spreading of cells	1/107	42/18986	0.0238095	4.22474	1.57504	0.211504	0.4274	0.400883	HBEGF	1
GO:0048246	macrophage chemotaxis	1/107	42/18986	0.0238095	4.22474	1.57504	0.211504	0.4274	0.400883	SAA1	1
GO:0051154	negative regulation of striated muscle cell differentiation	1/107	42/18986	0.0238095	4.22474	1.57504	0.211504	0.4274	0.400883	BHLHE41	1
GO:0051955	regulation of amino acid transport	1/107	42/18986	0.0238095	4.22474	1.57504	0.211504	0.4274	0.400883	TRH	1
GO:0060306	regulation of membrane repolarization	1/107	42/18986	0.0238095	4.22474	1.57504	0.211504	0.4274	0.400883	CASQ2	1
GO:0090505	epiboly involved in wound healing	1/107	42/18986	0.0238095	4.22474	1.57504	0.211504	0.4274	0.400883	HBEGF	1
GO:0007611	learning or memory	3/107	282/18986	0.0106383	1.88765	1.1306	0.21276	0.429493	0.402846	ARC/EGR2/CALB1	3
GO:0071326	cellular response to monosaccharide stimulus	2/107	153/18986	0.0130719	2.31947	1.23365	0.213386	0.429865	0.403195	PRKCE/IRS2	2
GO:2001235	positive regulation of apoptotic signaling pathway	2/107	153/18986	0.0130719	2.31947	1.23365	0.213386	0.429865	0.403195	INHBA/TNFSF15	2
GO:0048880	sensory system development	4/107	422/18986	0.00947867	1.68189	1.06645	0.214897	0.43246	0.405629	ZEB1/INHBA/BMP6/CALB1	4
GO:0006040	amino sugar metabolic process	1/107	43/18986	0.0232558	4.12649	1.54517	0.215957	0.433251	0.40637	NPL	1
GO:0031111	negative regulation of microtubule polymerization or depolymerization	1/107	43/18986	0.0232558	4.12649	1.54517	0.215957	0.433251	0.40637	CDH5	1
GO:0090504	epiboly	1/107	43/18986	0.0232558	4.12649	1.54517	0.215957	0.433251	0.40637	HBEGF	1
GO:0090596	sensory organ morphogenesis	3/107	285/18986	0.0105263	1.86778	1.11124	0.217159	0.435213	0.408211	ZEB1/CLRN1/CALB1	3
GO:0008037	cell recognition	2/107	156/18986	0.0128205	2.27486	1.20367	0.219587	0.438071	0.410891	CLEC4M/COLEC12	2
GO:0071456	cellular response to hypoxia	2/107	156/18986	0.0128205	2.27486	1.20367	0.219587	0.438071	0.410891	PRKCE/INHBA	2
GO:0097530	granulocyte migration	2/107	156/18986	0.0128205	2.27486	1.20367	0.219587	0.438071	0.410891	THBS4/SAA1	2
GO:0030098	lymphocyte differentiation	4/107	426/18986	0.00938967	1.6661	1.04679	0.219638	0.438071	0.410891	ZEB1/INHBA/CMTM7/CR2	4
GO:0030501	positive regulation of bone mineralization	1/107	44/18986	0.0227273	4.03271	1.51618	0.220386	0.438071	0.410891	BMP6	1
GO:0045494	photoreceptor cell maintenance	1/107	44/18986	0.0227273	4.03271	1.51618	0.220386	0.438071	0.410891	CLRN1	1
GO:0046717	acid secretion	1/107	44/18986	0.0227273	4.03271	1.51618	0.220386	0.438071	0.410891	TRH	1
GO:0150052	regulation of postsynapse assembly	1/107	44/18986	0.0227273	4.03271	1.51618	0.220386	0.438071	0.410891	SYNDIG1	1
GO:0042552	myelination	2/107	158/18986	0.0126582	2.24607	1.18406	0.22373	0.442307	0.414864	HYCC1/EGR2	2
GO:0061448	connective tissue development	3/107	290/18986	0.0103448	1.83558	1.07949	0.224533	0.442307	0.414864	ZEB1/OGN/BMP6	3
GO:0010712	regulation of collagen metabolic process	1/107	45/18986	0.0222222	3.94309	1.48805	0.22479	0.442307	0.414864	INHBA	1
GO:0032689	negative regulation of type II interferon production	1/107	45/18986	0.0222222	3.94309	1.48805	0.22479	0.442307	0.414864	INHBA	1
GO:0042554	superoxide anion generation	1/107	45/18986	0.0222222	3.94309	1.48805	0.22479	0.442307	0.414864	PRKCE	1
GO:0061001	regulation of dendritic spine morphogenesis	1/107	45/18986	0.0222222	3.94309	1.48805	0.22479	0.442307	0.414864	ARC	1
GO:0070296	sarcoplasmic reticulum calcium ion transport	1/107	45/18986	0.0222222	3.94309	1.48805	0.22479	0.442307	0.414864	CASQ2	1
GO:0120178	steroid hormone biosynthetic process	1/107	45/18986	0.0222222	3.94309	1.48805	0.22479	0.442307	0.414864	BMP6	1
GO:1990776	response to angiotensin	1/107	45/18986	0.0222222	3.94309	1.48805	0.22479	0.442307	0.414864	INHBA	1
GO:2001239	regulation of extrinsic apoptotic signaling pathway in absence of ligand	1/107	45/18986	0.0222222	3.94309	1.48805	0.22479	0.442307	0.414864	INHBA	1
GO:0046718	symbiont entry into host cell	2/107	159/18986	0.0125786	2.23194	1.17437	0.225804	0.443853	0.416314	CLEC4M/CR2	2
GO:0007272	ensheathment of neurons	2/107	160/18986	0.0125	2.21799	1.16475	0.227879	0.444629	0.417043	HYCC1/EGR2	2
GO:0008366	axon ensheathment	2/107	160/18986	0.0125	2.21799	1.16475	0.227879	0.444629	0.417043	HYCC1/EGR2	2
GO:0016525	negative regulation of angiogenesis	2/107	160/18986	0.0125	2.21799	1.16475	0.227879	0.444629	0.417043	THBS4/NPR1	2
GO:0035966	response to topologically incorrect protein	2/107	160/18986	0.0125	2.21799	1.16475	0.227879	0.444629	0.417043	THBS4/ERP27	2
GO:0097696	cell surface receptor signaling pathway via STAT	2/107	160/18986	0.0125	2.21799	1.16475	0.227879	0.444629	0.417043	IL12A/IL10RA	2
GO:0051258	protein polymerization	3/107	293/18986	0.0102389	1.81678	1.06074	0.228982	0.444629	0.417043	PRKCE/CDH5/CASQ2	3
GO:0005978	glycogen biosynthetic process	1/107	46/18986	0.0217391	3.85738	1.46071	0.229169	0.444629	0.417043	IRS2	1
GO:0009250	glucan biosynthetic process	1/107	46/18986	0.0217391	3.85738	1.46071	0.229169	0.444629	0.417043	IRS2	1
GO:0030890	positive regulation of B cell proliferation	1/107	46/18986	0.0217391	3.85738	1.46071	0.229169	0.444629	0.417043	IRS2	1
GO:0042398	cellular modified amino acid biosynthetic process	1/107	46/18986	0.0217391	3.85738	1.46071	0.229169	0.444629	0.417043	CHAC2	1
GO:0045646	regulation of erythrocyte differentiation	1/107	46/18986	0.0217391	3.85738	1.46071	0.229169	0.444629	0.417043	INHBA	1
GO:0045687	positive regulation of glial cell differentiation	1/107	46/18986	0.0217391	3.85738	1.46071	0.229169	0.444629	0.417043	EGR2	1
GO:0060443	mammary gland morphogenesis	1/107	46/18986	0.0217391	3.85738	1.46071	0.229169	0.444629	0.417043	AREG	1
GO:0030902	hindbrain development	2/107	162/18986	0.0123457	2.19061	1.14572	0.232034	0.44541	0.417776	EGR2/SSTR2	2
GO:2000181	negative regulation of blood vessel morphogenesis	2/107	162/18986	0.0123457	2.19061	1.14572	0.232034	0.44541	0.417776	THBS4/NPR1	2
GO:0010830	regulation of myotube differentiation	1/107	47/18986	0.0212766	3.7753	1.43413	0.233524	0.44541	0.417776	BHLHE41	1
GO:0031641	regulation of myelination	1/107	47/18986	0.0212766	3.7753	1.43413	0.233524	0.44541	0.417776	EGR2	1
GO:0032309	icosanoid secretion	1/107	47/18986	0.0212766	3.7753	1.43413	0.233524	0.44541	0.417776	NMUR2	1
GO:0032892	positive regulation of organic acid transport	1/107	47/18986	0.0212766	3.7753	1.43413	0.233524	0.44541	0.417776	TRH	1
GO:0032941	secretion by tissue	1/107	47/18986	0.0212766	3.7753	1.43413	0.233524	0.44541	0.417776	PRKCE	1
GO:0042168	heme metabolic process	1/107	47/18986	0.0212766	3.7753	1.43413	0.233524	0.44541	0.417776	SLCO2B1	1
GO:0048247	lymphocyte chemotaxis	1/107	47/18986	0.0212766	3.7753	1.43413	0.233524	0.44541	0.417776	SAA1	1
GO:0050919	negative chemotaxis	1/107	47/18986	0.0212766	3.7753	1.43413	0.233524	0.44541	0.417776	FLRT3	1
GO:0055078	sodium ion homeostasis	1/107	47/18986	0.0212766	3.7753	1.43413	0.233524	0.44541	0.417776	NPR1	1
GO:0060711	labyrinthine layer development	1/107	47/18986	0.0212766	3.7753	1.43413	0.233524	0.44541	0.417776	CITED1	1
GO:0070741	response to interleukin-6	1/107	47/18986	0.0212766	3.7753	1.43413	0.233524	0.44541	0.417776	CITED1	1
GO:1902622	regulation of neutrophil migration	1/107	47/18986	0.0212766	3.7753	1.43413	0.233524	0.44541	0.417776	THBS4	1
GO:1903307	positive regulation of regulated secretory pathway	1/107	47/18986	0.0212766	3.7753	1.43413	0.233524	0.44541	0.417776	FGR	1
GO:0036294	cellular response to decreased oxygen levels	2/107	163/18986	0.0122699	2.17717	1.13631	0.234113	0.44541	0.417776	PRKCE/INHBA	2
GO:0120254	olefinic compound metabolic process	2/107	163/18986	0.0122699	2.17717	1.13631	0.234113	0.44541	0.417776	INHBA/BMP6	2
GO:0030010	establishment of cell polarity	2/107	164/18986	0.0121951	2.16389	1.12696	0.236193	0.44541	0.417776	CDH5/FOXF1	2
GO:0044409	symbiont entry into host	2/107	164/18986	0.0121951	2.16389	1.12696	0.236193	0.44541	0.417776	CLEC4M/CR2	2
GO:1901343	negative regulation of vasculature development	2/107	164/18986	0.0121951	2.16389	1.12696	0.236193	0.44541	0.417776	THBS4/NPR1	2
GO:2001236	regulation of extrinsic apoptotic signaling pathway	2/107	164/18986	0.0121951	2.16389	1.12696	0.236193	0.44541	0.417776	INHBA/TNFSF15	2
GO:0001881	receptor recycling	1/107	48/18986	0.0208333	3.69665	1.40827	0.237854	0.44541	0.417776	PCSK9	1
GO:0002920	regulation of humoral immune response	1/107	48/18986	0.0208333	3.69665	1.40827	0.237854	0.44541	0.417776	CR2	1
GO:0006862	nucleotide transport	1/107	48/18986	0.0208333	3.69665	1.40827	0.237854	0.44541	0.417776	CALHM6	1
GO:0006953	acute-phase response	1/107	48/18986	0.0208333	3.69665	1.40827	0.237854	0.44541	0.417776	SAA1	1
GO:0007520	myoblast fusion	1/107	48/18986	0.0208333	3.69665	1.40827	0.237854	0.44541	0.417776	ADAM12	1
GO:0007622	rhythmic behavior	1/107	48/18986	0.0208333	3.69665	1.40827	0.237854	0.44541	0.417776	EGR2	1
GO:0016339	calcium-dependent cell-cell adhesion via plasma membrane cell adhesion molecules	1/107	48/18986	0.0208333	3.69665	1.40827	0.237854	0.44541	0.417776	CDH5	1
GO:0032881	regulation of polysaccharide metabolic process	1/107	48/18986	0.0208333	3.69665	1.40827	0.237854	0.44541	0.417776	IRS2	1
GO:0048806	genitalia development	1/107	48/18986	0.0208333	3.69665	1.40827	0.237854	0.44541	0.417776	BMP6	1
GO:1903587	regulation of blood vessel endothelial cell proliferation involved in sprouting angiogenesis	1/107	48/18986	0.0208333	3.69665	1.40827	0.237854	0.44541	0.417776	IL12A	1
GO:1904894	positive regulation of receptor signaling pathway via STAT	1/107	48/18986	0.0208333	3.69665	1.40827	0.237854	0.44541	0.417776	IL10RA	1
GO:0048511	rhythmic process	3/107	299/18986	0.0100334	1.78033	1.02388	0.237929	0.44541	0.417776	INHBA/BHLHE41/KCNH7	3
GO:0006633	fatty acid biosynthetic process	2/107	165/18986	0.0121212	2.15078	1.11769	0.238275	0.44541	0.417776	FABP5/ACSM5	2
GO:0006865	amino acid transport	2/107	165/18986	0.0121212	2.15078	1.11769	0.238275	0.44541	0.417776	SLC6A19/TRH	2
GO:0048562	embryonic organ morphogenesis	3/107	300/18986	0.01	1.77439	1.01782	0.239426	0.44541	0.417776	ZEB1/CLRN1/FOXF1	3
GO:0051147	regulation of muscle cell differentiation	2/107	166/18986	0.0120482	2.13782	1.10848	0.240357	0.44541	0.417776	ZEB1/BHLHE41	2
GO:0070665	positive regulation of leukocyte proliferation	2/107	166/18986	0.0120482	2.13782	1.10848	0.240357	0.44541	0.417776	IRS2/IL12A	2
GO:0002861	regulation of inflammatory response to antigenic stimulus	1/107	49/18986	0.0204082	3.62121	1.38309	0.24216	0.44541	0.417776	FGR	1
GO:0006479	protein methylation	1/107	49/18986	0.0204082	3.62121	1.38309	0.24216	0.44541	0.417776	PRDM12	1
GO:0008213	protein alkylation	1/107	49/18986	0.0204082	3.62121	1.38309	0.24216	0.44541	0.417776	PRDM12	1
GO:0014037	Schwann cell differentiation	1/107	49/18986	0.0204082	3.62121	1.38309	0.24216	0.44541	0.417776	EGR2	1
GO:0021795	cerebral cortex cell migration	1/107	49/18986	0.0204082	3.62121	1.38309	0.24216	0.44541	0.417776	LHX6	1
GO:0032620	interleukin-17 production	1/107	49/18986	0.0204082	3.62121	1.38309	0.24216	0.44541	0.417776	IL12A	1
GO:0032660	regulation of interleukin-17 production	1/107	49/18986	0.0204082	3.62121	1.38309	0.24216	0.44541	0.417776	IL12A	1
GO:0035850	epithelial cell differentiation involved in kidney development	1/107	49/18986	0.0204082	3.62121	1.38309	0.24216	0.44541	0.417776	KLF15	1
GO:0042269	regulation of natural killer cell mediated cytotoxicity	1/107	49/18986	0.0204082	3.62121	1.38309	0.24216	0.44541	0.417776	IL12A	1
GO:0042491	inner ear auditory receptor cell differentiation	1/107	49/18986	0.0204082	3.62121	1.38309	0.24216	0.44541	0.417776	CLRN1	1
GO:0043029	T cell homeostasis	1/107	49/18986	0.0204082	3.62121	1.38309	0.24216	0.44541	0.417776	LMO1	1
GO:0043330	response to exogenous dsRNA	1/107	49/18986	0.0204082	3.62121	1.38309	0.24216	0.44541	0.417776	COLEC12	1
GO:0044273	sulfur compound catabolic process	1/107	49/18986	0.0204082	3.62121	1.38309	0.24216	0.44541	0.417776	CHAC2	1
GO:0045197	establishment or maintenance of epithelial cell apical/basal polarity	1/107	49/18986	0.0204082	3.62121	1.38309	0.24216	0.44541	0.417776	FOXF1	1
GO:0048066	developmental pigmentation	1/107	49/18986	0.0204082	3.62121	1.38309	0.24216	0.44541	0.417776	CITED1	1
GO:0048546	digestive tract morphogenesis	1/107	49/18986	0.0204082	3.62121	1.38309	0.24216	0.44541	0.417776	FOXF1	1
GO:0061028	establishment of endothelial barrier	1/107	49/18986	0.0204082	3.62121	1.38309	0.24216	0.44541	0.417776	CDH5	1
GO:0048592	eye morphogenesis	2/107	167/18986	0.011976	2.12502	1.09933	0.242441	0.445505	0.417864	ZEB1/CALB1	2
GO:0007156	homophilic cell adhesion via plasma membrane adhesion molecules	2/107	168/18986	0.0119048	2.11237	1.09025	0.244525	0.447671	0.419896	CDH5/PCDHA4	2
GO:0051963	regulation of synapse assembly	2/107	168/18986	0.0119048	2.11237	1.09025	0.244525	0.447671	0.419896	SYNDIG1/FLRT3	2
GO:0002347	response to tumor cell	1/107	50/18986	0.02	3.54879	1.35857	0.246442	0.447671	0.419896	IL12A	1
GO:0010907	positive regulation of glucose metabolic process	1/107	50/18986	0.02	3.54879	1.35857	0.246442	0.447671	0.419896	IRS2	1
GO:0022602	ovulation cycle process	1/107	50/18986	0.02	3.54879	1.35857	0.246442	0.447671	0.419896	INHBA	1
GO:0030195	negative regulation of blood coagulation	1/107	50/18986	0.02	3.54879	1.35857	0.246442	0.447671	0.419896	C1QTNF1	1
GO:0051150	regulation of smooth muscle cell differentiation	1/107	50/18986	0.02	3.54879	1.35857	0.246442	0.447671	0.419896	ZEB1	1
GO:0051489	regulation of filopodium assembly	1/107	50/18986	0.02	3.54879	1.35857	0.246442	0.447671	0.419896	TENM2	1
GO:0140894	endolysosomal toll-like receptor signaling pathway	1/107	50/18986	0.02	3.54879	1.35857	0.246442	0.447671	0.419896	COLEC12	1
GO:2001258	negative regulation of cation channel activity	1/107	50/18986	0.02	3.54879	1.35857	0.246442	0.447671	0.419896	CASQ2	1
GO:0007605	sensory perception of sound	2/107	169/18986	0.0118343	2.09987	1.08123	0.24661	0.447671	0.419896	CLRN1/CLIC5	2
GO:0051250	negative regulation of lymphocyte activation	2/107	169/18986	0.0118343	2.09987	1.08123	0.24661	0.447671	0.419896	INHBA/FGR	2
GO:1990138	neuron projection extension	2/107	169/18986	0.0118343	2.09987	1.08123	0.24661	0.447671	0.419896	FLRT3/FLRT1	2
GO:0010563	negative regulation of phosphorus metabolic process	3/107	306/18986	0.00980392	1.7396	0.981922	0.248443	0.448963	0.421107	IRS2/INHBA/INSM1	3
GO:0045936	negative regulation of phosphate metabolic process	3/107	306/18986	0.00980392	1.7396	0.981922	0.248443	0.448963	0.421107	IRS2/INHBA/INSM1	3
GO:0007292	female gamete generation	2/107	170/18986	0.0117647	2.08752	1.07227	0.248696	0.448963	0.421107	INHBA/HPGD	2
GO:0030100	regulation of endocytosis	3/107	307/18986	0.00977199	1.73393	0.976016	0.249952	0.448963	0.421107	ARC/FGR/PCSK9	3
GO:0001914	regulation of T cell mediated cytotoxicity	1/107	51/18986	0.0196078	3.4792	1.33466	0.250701	0.448963	0.421107	IL12A	1
GO:0006346	DNA methylation-dependent heterochromatin formation	1/107	51/18986	0.0196078	3.4792	1.33466	0.250701	0.448963	0.421107	TEX15	1
GO:0006636	unsaturated fatty acid biosynthetic process	1/107	51/18986	0.0196078	3.4792	1.33466	0.250701	0.448963	0.421107	FABP5	1
GO:0008206	bile acid metabolic process	1/107	51/18986	0.0196078	3.4792	1.33466	0.250701	0.448963	0.421107	FGF19	1
GO:0032365	intracellular lipid transport	1/107	51/18986	0.0196078	3.4792	1.33466	0.250701	0.448963	0.421107	PCSK9	1
GO:0032467	positive regulation of cytokinesis	1/107	51/18986	0.0196078	3.4792	1.33466	0.250701	0.448963	0.421107	PRKCE	1
GO:0038084	vascular endothelial growth factor signaling pathway	1/107	51/18986	0.0196078	3.4792	1.33466	0.250701	0.448963	0.421107	IL12A	1
GO:0060119	inner ear receptor cell development	1/107	51/18986	0.0196078	3.4792	1.33466	0.250701	0.448963	0.421107	CLRN1	1
GO:1900047	negative regulation of hemostasis	1/107	51/18986	0.0196078	3.4792	1.33466	0.250701	0.448963	0.421107	C1QTNF1	1
GO:1901016	regulation of potassium ion transmembrane transporter activity	1/107	51/18986	0.0196078	3.4792	1.33466	0.250701	0.448963	0.421107	CASQ2	1
GO:0061351	neural precursor cell proliferation	2/107	171/18986	0.0116959	2.07531	1.06338	0.250782	0.448963	0.421107	OTP/INSM1	2
GO:0003197	endocardial cushion development	1/107	52/18986	0.0192308	3.41229	1.31135	0.254935	0.452275	0.424214	FOXF1	1
GO:0030838	positive regulation of actin filament polymerization	1/107	52/18986	0.0192308	3.41229	1.31135	0.254935	0.452275	0.424214	PRKCE	1
GO:0032924	activin receptor signaling pathway	1/107	52/18986	0.0192308	3.41229	1.31135	0.254935	0.452275	0.424214	INHBA	1
GO:0032964	collagen biosynthetic process	1/107	52/18986	0.0192308	3.41229	1.31135	0.254935	0.452275	0.424214	INHBA	1
GO:0035987	endodermal cell differentiation	1/107	52/18986	0.0192308	3.41229	1.31135	0.254935	0.452275	0.424214	INHBA	1
GO:0045214	sarcomere organization	1/107	52/18986	0.0192308	3.41229	1.31135	0.254935	0.452275	0.424214	LDB3	1
GO:0051180	vitamin transport	1/107	52/18986	0.0192308	3.41229	1.31135	0.254935	0.452275	0.424214	SLC2A14	1
GO:0071622	regulation of granulocyte chemotaxis	1/107	52/18986	0.0192308	3.41229	1.31135	0.254935	0.452275	0.424214	THBS4	1
GO:0015748	organophosphate ester transport	2/107	173/18986	0.0115607	2.05132	1.04577	0.254957	0.452275	0.424214	CALHM6/ATP10D	2
GO:0030308	negative regulation of cell growth	2/107	173/18986	0.0115607	2.05132	1.04577	0.254957	0.452275	0.424214	INHBA/NPR1	2
GO:0006937	regulation of muscle contraction	2/107	174/18986	0.0114943	2.03953	1.03706	0.257045	0.454321	0.426134	NMUR2/CASQ2	2
GO:0015698	inorganic anion transport	2/107	174/18986	0.0114943	2.03953	1.03706	0.257045	0.454321	0.426134	NMUR2/CLIC5	2
GO:0048568	embryonic organ development	4/107	458/18986	0.00873362	1.54969	0.896483	0.258503	0.454321	0.426134	ZEB1/CLRN1/CITED1/FOXF1	4
GO:0046661	male sex differentiation	2/107	175/18986	0.0114286	2.02788	1.0284	0.259133	0.454321	0.426134	INHBA/BMP6	2
GO:0050680	negative regulation of epithelial cell proliferation	2/107	175/18986	0.0114286	2.02788	1.0284	0.259133	0.454321	0.426134	ZEB1/IL12A	2
GO:0032330	regulation of chondrocyte differentiation	1/107	53/18986	0.0188679	3.34791	1.2886	0.259145	0.454321	0.426134	BMP6	1
GO:0032387	negative regulation of intracellular transport	1/107	53/18986	0.0188679	3.34791	1.2886	0.259145	0.454321	0.426134	PCSK9	1
GO:0035088	establishment or maintenance of apical/basal cell polarity	1/107	53/18986	0.0188679	3.34791	1.2886	0.259145	0.454321	0.426134	FOXF1	1
GO:0060324	face development	1/107	53/18986	0.0188679	3.34791	1.2886	0.259145	0.454321	0.426134	SOX3	1
GO:0061245	establishment or maintenance of bipolar cell polarity	1/107	53/18986	0.0188679	3.34791	1.2886	0.259145	0.454321	0.426134	FOXF1	1
GO:1902743	regulation of lamellipodium organization	1/107	53/18986	0.0188679	3.34791	1.2886	0.259145	0.454321	0.426134	CLRN1	1
GO:1903170	negative regulation of calcium ion transmembrane transport	1/107	53/18986	0.0188679	3.34791	1.2886	0.259145	0.454321	0.426134	CASQ2	1
GO:1904707	positive regulation of vascular associated smooth muscle cell proliferation	1/107	53/18986	0.0188679	3.34791	1.2886	0.259145	0.454321	0.426134	HPGD	1
GO:0051146	striated muscle cell differentiation	3/107	314/18986	0.00955414	1.69528	0.935269	0.260548	0.454698	0.426487	LDB3/ADAM12/BHLHE41	3
GO:0050905	neuromuscular process	2/107	176/18986	0.0113636	2.01636	1.0198	0.261221	0.454698	0.426487	CLRN1/FOXS1	2
GO:0002366	leukocyte activation involved in immune response	3/107	315/18986	0.00952381	1.6899	0.929531	0.262067	0.454698	0.426487	PRKCE/FGR/FOXF1	3
GO:0006820	monoatomic anion transport	2/107	177/18986	0.0112994	2.00496	1.01126	0.26331	0.454698	0.426487	NMUR2/CLIC5	2
GO:0007254	JNK cascade	2/107	177/18986	0.0112994	2.00496	1.01126	0.26331	0.454698	0.426487	FGF19/SH2D3C	2
GO:0001738	morphogenesis of a polarized epithelium	1/107	54/18986	0.0185185	3.28591	1.26639	0.263332	0.454698	0.426487	FOXF1	1
GO:0006778	porphyrin-containing compound metabolic process	1/107	54/18986	0.0185185	3.28591	1.26639	0.263332	0.454698	0.426487	SLCO2B1	1
GO:0007129	homologous chromosome pairing at meiosis	1/107	54/18986	0.0185185	3.28591	1.26639	0.263332	0.454698	0.426487	TEX15	1
GO:0010543	regulation of platelet activation	1/107	54/18986	0.0185185	3.28591	1.26639	0.263332	0.454698	0.426487	C1QTNF1	1
GO:0010559	regulation of glycoprotein biosynthetic process	1/107	54/18986	0.0185185	3.28591	1.26639	0.263332	0.454698	0.426487	HBEGF	1
GO:0042304	regulation of fatty acid biosynthetic process	1/107	54/18986	0.0185185	3.28591	1.26639	0.263332	0.454698	0.426487	FABP5	1
GO:0045332	phospholipid translocation	1/107	54/18986	0.0185185	3.28591	1.26639	0.263332	0.454698	0.426487	ATP10D	1
GO:0048286	lung alveolus development	1/107	54/18986	0.0185185	3.28591	1.26639	0.263332	0.454698	0.426487	FOXF1	1
GO:0050819	negative regulation of coagulation	1/107	54/18986	0.0185185	3.28591	1.26639	0.263332	0.454698	0.426487	C1QTNF1	1
GO:0070169	positive regulation of biomineral tissue development	1/107	54/18986	0.0185185	3.28591	1.26639	0.263332	0.454698	0.426487	BMP6	1
GO:1902692	regulation of neuroblast proliferation	1/107	54/18986	0.0185185	3.28591	1.26639	0.263332	0.454698	0.426487	OTP	1
GO:1904263	positive regulation of TORC1 signaling	1/107	54/18986	0.0185185	3.28591	1.26639	0.263332	0.454698	0.426487	STAMBPL1	1
GO:0071453	cellular response to oxygen levels	2/107	178/18986	0.011236	1.9937	1.00277	0.265399	0.45786	0.429453	PRKCE/INHBA	2
GO:1904062	regulation of monoatomic cation transmembrane transport	3/107	318/18986	0.00943396	1.67396	0.912438	0.26663	0.458228	0.429798	PRKCE/CASQ2/PCSK9	3
GO:1903169	regulation of calcium ion transmembrane transport	2/107	179/18986	0.0111732	1.98256	0.994338	0.267488	0.458228	0.429798	PRKCE/CASQ2	2
GO:0007140	male meiotic nuclear division	1/107	55/18986	0.0181818	3.22617	1.24469	0.267496	0.458228	0.429798	TEX15	1
GO:0034381	plasma lipoprotein particle clearance	1/107	55/18986	0.0181818	3.22617	1.24469	0.267496	0.458228	0.429798	PCSK9	1
GO:0045778	positive regulation of ossification	1/107	55/18986	0.0181818	3.22617	1.24469	0.267496	0.458228	0.429798	BMP6	1
GO:0046854	phosphatidylinositol phosphate biosynthetic process	1/107	55/18986	0.0181818	3.22617	1.24469	0.267496	0.458228	0.429798	HYCC1	1
GO:0060425	lung morphogenesis	1/107	55/18986	0.0181818	3.22617	1.24469	0.267496	0.458228	0.429798	FOXF1	1
GO:0071385	cellular response to glucocorticoid stimulus	1/107	55/18986	0.0181818	3.22617	1.24469	0.267496	0.458228	0.429798	SSTR2	1
GO:0002263	cell activation involved in immune response	3/107	319/18986	0.00940439	1.66871	0.90678	0.268154	0.458951	0.430476	PRKCE/FGR/FOXF1	3
GO:0017015	regulation of transforming growth factor beta receptor signaling pathway	2/107	180/18986	0.0111111	1.97155	0.985961	0.269577	0.460456	0.431888	ZEB1/CITED1	2
GO:0055088	lipid homeostasis	2/107	180/18986	0.0111111	1.97155	0.985961	0.269577	0.460456	0.431888	IRS2/PCSK9	2
GO:0002455	humoral immune response mediated by circulating immunoglobulin	1/107	56/18986	0.0178571	3.16856	1.22348	0.271636	0.460456	0.431888	CR2	1
GO:0006749	glutathione metabolic process	1/107	56/18986	0.0178571	3.16856	1.22348	0.271636	0.460456	0.431888	CHAC2	1
GO:0007187	G protein-coupled receptor signaling pathway, coupled to cyclic nucleotide second messenger	1/107	56/18986	0.0178571	3.16856	1.22348	0.271636	0.460456	0.431888	SSTR2	1
GO:0010761	fibroblast migration	1/107	56/18986	0.0178571	3.16856	1.22348	0.271636	0.460456	0.431888	PRKCE	1
GO:0030857	negative regulation of epithelial cell differentiation	1/107	56/18986	0.0178571	3.16856	1.22348	0.271636	0.460456	0.431888	ZEB1	1
GO:0048260	positive regulation of receptor-mediated endocytosis	1/107	56/18986	0.0178571	3.16856	1.22348	0.271636	0.460456	0.431888	PCSK9	1
GO:0086065	cell communication involved in cardiac conduction	1/107	56/18986	0.0178571	3.16856	1.22348	0.271636	0.460456	0.431888	CASQ2	1
GO:1904645	response to amyloid-beta	1/107	56/18986	0.0178571	3.16856	1.22348	0.271636	0.460456	0.431888	CALCR	1
GO:2000648	positive regulation of stem cell proliferation	1/107	56/18986	0.0178571	3.16856	1.22348	0.271636	0.460456	0.431888	CITED1	1
GO:0031214	biomineral tissue development	2/107	182/18986	0.010989	1.94988	0.969366	0.273755	0.462111	0.43344	FGR/BMP6	2
GO:0019058	viral life cycle	3/107	323/18986	0.00928793	1.64804	0.884345	0.274258	0.462111	0.43344	CLEC4M/SLC6A19/CR2	3
GO:0001895	retina homeostasis	1/107	57/18986	0.0175439	3.11297	1.20275	0.275753	0.462111	0.43344	CLRN1	1
GO:0002762	negative regulation of myeloid leukocyte differentiation	1/107	57/18986	0.0175439	3.11297	1.20275	0.275753	0.462111	0.43344	INHBA	1
GO:0014888	striated muscle adaptation	1/107	57/18986	0.0175439	3.11297	1.20275	0.275753	0.462111	0.43344	KLF15	1
GO:0035315	hair cell differentiation	1/107	57/18986	0.0175439	3.11297	1.20275	0.275753	0.462111	0.43344	CLRN1	1
GO:0043331	response to dsRNA	1/107	57/18986	0.0175439	3.11297	1.20275	0.275753	0.462111	0.43344	COLEC12	1
GO:0046148	pigment biosynthetic process	1/107	57/18986	0.0175439	3.11297	1.20275	0.275753	0.462111	0.43344	CITED1	1
GO:0061178	regulation of insulin secretion involved in cellular response to glucose stimulus	1/107	57/18986	0.0175439	3.11297	1.20275	0.275753	0.462111	0.43344	PRKCE	1
GO:2000107	negative regulation of leukocyte apoptotic process	1/107	57/18986	0.0175439	3.11297	1.20275	0.275753	0.462111	0.43344	IRS2	1
GO:0043588	skin development	3/107	324/18986	0.00925926	1.64296	0.878785	0.275786	0.462111	0.43344	INHBA/KRT9/SPRR3	3
GO:0017157	regulation of exocytosis	2/107	183/18986	0.010929	1.93923	0.961148	0.275843	0.462111	0.43344	FGR/FOXF1	2
GO:1903844	regulation of cellular response to transforming growth factor beta stimulus	2/107	183/18986	0.010929	1.93923	0.961148	0.275843	0.462111	0.43344	ZEB1/CITED1	2
GO:0043603	amide metabolic process	4/107	472/18986	0.00847458	1.50372	0.834295	0.275937	0.462111	0.43344	CHAC2/NPL/ACSM5/UROC1	4
GO:0001541	ovarian follicle development	1/107	58/18986	0.0172414	3.0593	1.18247	0.279847	0.465057	0.436203	INHBA	1
GO:0015804	neutral amino acid transport	1/107	58/18986	0.0172414	3.0593	1.18247	0.279847	0.465057	0.436203	SLC6A19	1
GO:0034204	lipid translocation	1/107	58/18986	0.0172414	3.0593	1.18247	0.279847	0.465057	0.436203	ATP10D	1
GO:0042220	response to cocaine	1/107	58/18986	0.0172414	3.0593	1.18247	0.279847	0.465057	0.436203	ARC	1
GO:0050805	negative regulation of synaptic transmission	1/107	58/18986	0.0172414	3.0593	1.18247	0.279847	0.465057	0.436203	ARC	1
GO:0061005	cell differentiation involved in kidney development	1/107	58/18986	0.0172414	3.0593	1.18247	0.279847	0.465057	0.436203	KLF15	1
GO:0072132	mesenchyme morphogenesis	1/107	58/18986	0.0172414	3.0593	1.18247	0.279847	0.465057	0.436203	FOXF1	1
GO:0086009	membrane repolarization	1/107	58/18986	0.0172414	3.0593	1.18247	0.279847	0.465057	0.436203	CASQ2	1
GO:1902930	regulation of alcohol biosynthetic process	1/107	58/18986	0.0172414	3.0593	1.18247	0.279847	0.465057	0.436203	BMP6	1
GO:0050890	cognition	3/107	329/18986	0.00911854	1.61799	0.851264	0.283442	0.470617	0.441418	ARC/EGR2/CALB1	3
GO:0006473	protein acetylation	1/107	59/18986	0.0169492	3.00744	1.16262	0.283918	0.470617	0.441418	KLF15	1
GO:0051480	regulation of cytosolic calcium ion concentration	1/107	59/18986	0.0169492	3.00744	1.16262	0.283918	0.470617	0.441418	CALB1	1
GO:0043269	regulation of monoatomic ion transport	4/107	480/18986	0.00833333	1.47866	0.799649	0.28599	0.473648	0.444261	PRKCE/ARC/CASQ2/PCSK9	4
GO:0046394	carboxylic acid biosynthetic process	3/107	331/18986	0.00906344	1.60821	0.840385	0.28651	0.473696	0.444306	FABP5/FGF19/ACSM5	3
GO:0060562	epithelial tube morphogenesis	3/107	331/18986	0.00906344	1.60821	0.840385	0.28651	0.473696	0.444306	AREG/CITED1/FOXF1	3
GO:0002707	negative regulation of lymphocyte mediated immunity	1/107	60/18986	0.0166667	2.95732	1.14318	0.287966	0.473696	0.444306	CR2	1
GO:0046456	icosanoid biosynthetic process	1/107	60/18986	0.0166667	2.95732	1.14318	0.287966	0.473696	0.444306	FABP5	1
GO:0060350	endochondral bone morphogenesis	1/107	60/18986	0.0166667	2.95732	1.14318	0.287966	0.473696	0.444306	BMP6	1
GO:0060997	dendritic spine morphogenesis	1/107	60/18986	0.0166667	2.95732	1.14318	0.287966	0.473696	0.444306	ARC	1
GO:0097479	synaptic vesicle localization	1/107	60/18986	0.0166667	2.95732	1.14318	0.287966	0.473696	0.444306	SYNDIG1	1
GO:1903018	regulation of glycoprotein metabolic process	1/107	60/18986	0.0166667	2.95732	1.14318	0.287966	0.473696	0.444306	HBEGF	1
GO:0097553	calcium ion transmembrane import into cytosol	2/107	189/18986	0.010582	1.87766	0.912899	0.288367	0.473955	0.444549	PRKCE/CASQ2	2
GO:0051302	regulation of cell division	2/107	190/18986	0.0105263	1.86778	0.905028	0.290453	0.476691	0.447116	PRKCE/THBS4	2
GO:0016053	organic acid biosynthetic process	3/107	334/18986	0.00898204	1.59377	0.824201	0.291118	0.476691	0.447116	FABP5/FGF19/ACSM5	3
GO:0001658	branching involved in ureteric bud morphogenesis	1/107	61/18986	0.0163934	2.90884	1.12415	0.291992	0.476691	0.447116	CITED1	1
GO:0001706	endoderm formation	1/107	61/18986	0.0163934	2.90884	1.12415	0.291992	0.476691	0.447116	INHBA	1
GO:0001913	T cell mediated cytotoxicity	1/107	61/18986	0.0163934	2.90884	1.12415	0.291992	0.476691	0.447116	IL12A	1
GO:0014009	glial cell proliferation	1/107	61/18986	0.0163934	2.90884	1.12415	0.291992	0.476691	0.447116	AREG	1
GO:0032147	activation of protein kinase activity	1/107	61/18986	0.0163934	2.90884	1.12415	0.291992	0.476691	0.447116	TNFSF15	1
GO:0070228	regulation of lymphocyte apoptotic process	1/107	61/18986	0.0163934	2.90884	1.12415	0.291992	0.476691	0.447116	IRS2	1
GO:0002429	immune response-activating cell surface receptor signaling pathway	3/107	336/18986	0.00892857	1.58428	0.813501	0.294192	0.478013	0.448355	PRKCE/FGR/CR2	3
GO:0000768	syncytium formation by plasma membrane fusion	1/107	62/18986	0.016129	2.86192	1.1055	0.295995	0.478013	0.448355	ADAM12	1
GO:0002823	negative regulation of adaptive immune response based on somatic recombination of immune receptors built from immunoglobulin superfamily domains	1/107	62/18986	0.016129	2.86192	1.1055	0.295995	0.478013	0.448355	CR2	1
GO:0006383	transcription by RNA polymerase III	1/107	62/18986	0.016129	2.86192	1.1055	0.295995	0.478013	0.448355	INHBA	1
GO:0006611	protein export from nucleus	1/107	62/18986	0.016129	2.86192	1.1055	0.295995	0.478013	0.448355	EGR2	1
GO:0006940	regulation of smooth muscle contraction	1/107	62/18986	0.016129	2.86192	1.1055	0.295995	0.478013	0.448355	NMUR2	1
GO:0007566	embryo implantation	1/107	62/18986	0.016129	2.86192	1.1055	0.295995	0.478013	0.448355	ARHGDIB	1
GO:0022029	telencephalon cell migration	1/107	62/18986	0.016129	2.86192	1.1055	0.295995	0.478013	0.448355	LHX6	1
GO:0045620	negative regulation of lymphocyte differentiation	1/107	62/18986	0.016129	2.86192	1.1055	0.295995	0.478013	0.448355	INHBA	1
GO:0051932	synaptic transmission, GABAergic	1/107	62/18986	0.016129	2.86192	1.1055	0.295995	0.478013	0.448355	PRKCE	1
GO:0140253	cell-cell fusion	1/107	62/18986	0.016129	2.86192	1.1055	0.295995	0.478013	0.448355	ADAM12	1
GO:0140719	constitutive heterochromatin formation	1/107	62/18986	0.016129	2.86192	1.1055	0.295995	0.478013	0.448355	TEX15	1
GO:1905517	macrophage migration	1/107	62/18986	0.016129	2.86192	1.1055	0.295995	0.478013	0.448355	SAA1	1
GO:0002712	regulation of B cell mediated immunity	1/107	63/18986	0.015873	2.8165	1.08722	0.299975	0.482839	0.452882	CR2	1
GO:0002889	regulation of immunoglobulin mediated immune response	1/107	63/18986	0.015873	2.8165	1.08722	0.299975	0.482839	0.452882	CR2	1
GO:0006919	activation of cysteine-type endopeptidase activity involved in apoptotic process	1/107	63/18986	0.015873	2.8165	1.08722	0.299975	0.482839	0.452882	TNFSF15	1
GO:0097035	regulation of membrane lipid distribution	1/107	63/18986	0.015873	2.8165	1.08722	0.299975	0.482839	0.452882	ATP10D	1
GO:0002040	sprouting angiogenesis	2/107	196/18986	0.0102041	1.8106	0.858779	0.302949	0.485197	0.455093	IL12A/BMPER	2
GO:0002695	negative regulation of leukocyte activation	2/107	196/18986	0.0102041	1.8106	0.858779	0.302949	0.485197	0.455093	INHBA/FGR	2
GO:0050954	sensory perception of mechanical stimulus	2/107	196/18986	0.0102041	1.8106	0.858779	0.302949	0.485197	0.455093	CLRN1/CLIC5	2
GO:0031400	negative regulation of protein modification process	3/107	342/18986	0.00877193	1.55648	0.781816	0.30343	0.485197	0.455093	PRKCE/KLF15/INSM1	3
GO:0042742	defense response to bacterium	3/107	342/18986	0.00877193	1.55648	0.781816	0.30343	0.485197	0.455093	FGR/IL12A/COLEC12	3
GO:0032091	negative regulation of protein binding	1/107	64/18986	0.015625	2.77249	1.0693	0.303934	0.485197	0.455093	PCSK9	1
GO:0033013	tetrapyrrole metabolic process	1/107	64/18986	0.015625	2.77249	1.0693	0.303934	0.485197	0.455093	SLCO2B1	1
GO:0034142	toll-like receptor 4 signaling pathway	1/107	64/18986	0.015625	2.77249	1.0693	0.303934	0.485197	0.455093	PRKCE	1
GO:1903670	regulation of sprouting angiogenesis	1/107	64/18986	0.015625	2.77249	1.0693	0.303934	0.485197	0.455093	BMPER	1
GO:2000351	regulation of endothelial cell apoptotic process	1/107	64/18986	0.015625	2.77249	1.0693	0.303934	0.485197	0.455093	CDH5	1
GO:0046474	glycerophospholipid biosynthetic process	2/107	197/18986	0.0101523	1.80141	0.851228	0.305029	0.486546	0.456359	FABP5/HYCC1	2
GO:1903829	positive regulation of protein localization	4/107	497/18986	0.00804829	1.42808	0.728042	0.307526	0.487481	0.457236	PRKCE/IRS2/BMP6/TRH	4
GO:0001756	somitogenesis	1/107	65/18986	0.0153846	2.72983	1.05171	0.30787	0.487481	0.457236	FOXF1	1
GO:0021545	cranial nerve development	1/107	65/18986	0.0153846	2.72983	1.05171	0.30787	0.487481	0.457236	EGR2	1
GO:0021885	forebrain cell migration	1/107	65/18986	0.0153846	2.72983	1.05171	0.30787	0.487481	0.457236	LHX6	1
GO:0031113	regulation of microtubule polymerization	1/107	65/18986	0.0153846	2.72983	1.05171	0.30787	0.487481	0.457236	CDH5	1
GO:0040014	regulation of multicellular organism growth	1/107	65/18986	0.0153846	2.72983	1.05171	0.30787	0.487481	0.457236	FOXS1	1
GO:0071384	cellular response to corticosteroid stimulus	1/107	65/18986	0.0153846	2.72983	1.05171	0.30787	0.487481	0.457236	SSTR2	1
GO:0097192	extrinsic apoptotic signaling pathway in absence of ligand	1/107	65/18986	0.0153846	2.72983	1.05171	0.30787	0.487481	0.457236	INHBA	1
GO:1903078	positive regulation of protein localization to plasma membrane	1/107	65/18986	0.0153846	2.72983	1.05171	0.30787	0.487481	0.457236	PRKCE	1
GO:0031334	positive regulation of protein-containing complex assembly	2/107	200/18986	0.01	1.77439	0.828832	0.311261	0.490883	0.460427	PRKCE/CDH5	2
GO:0000271	polysaccharide biosynthetic process	1/107	66/18986	0.0151515	2.68847	1.03446	0.311784	0.490883	0.460427	IRS2	1
GO:0001885	endothelial cell development	1/107	66/18986	0.0151515	2.68847	1.03446	0.311784	0.490883	0.460427	CDH5	1
GO:0006518	peptide metabolic process	1/107	66/18986	0.0151515	2.68847	1.03446	0.311784	0.490883	0.460427	CHAC2	1
GO:0006949	syncytium formation	1/107	66/18986	0.0151515	2.68847	1.03446	0.311784	0.490883	0.460427	ADAM12	1
GO:0070050	neuron cellular homeostasis	1/107	66/18986	0.0151515	2.68847	1.03446	0.311784	0.490883	0.460427	CALB1	1
GO:0070192	chromosome organization involved in meiotic cell cycle	1/107	66/18986	0.0151515	2.68847	1.03446	0.311784	0.490883	0.460427	TEX15	1
GO:0007369	gastrulation	2/107	202/18986	0.00990099	1.75682	0.814112	0.31541	0.493022	0.462433	INHBA/FOXF1	2
GO:0002820	negative regulation of adaptive immune response	1/107	67/18986	0.0149254	2.64835	1.01752	0.315676	0.493022	0.462433	CR2	1
GO:0006956	complement activation	1/107	67/18986	0.0149254	2.64835	1.01752	0.315676	0.493022	0.462433	CR2	1
GO:0030888	regulation of B cell proliferation	1/107	67/18986	0.0149254	2.64835	1.01752	0.315676	0.493022	0.462433	IRS2	1
GO:0032922	circadian regulation of gene expression	1/107	67/18986	0.0149254	2.64835	1.01752	0.315676	0.493022	0.462433	BHLHE41	1
GO:0035773	insulin secretion involved in cellular response to glucose stimulus	1/107	67/18986	0.0149254	2.64835	1.01752	0.315676	0.493022	0.462433	PRKCE	1
GO:0035904	aorta development	1/107	67/18986	0.0149254	2.64835	1.01752	0.315676	0.493022	0.462433	EGR2	1
GO:0038034	signal transduction in absence of ligand	1/107	67/18986	0.0149254	2.64835	1.01752	0.315676	0.493022	0.462433	INHBA	1
GO:0042446	hormone biosynthetic process	1/107	67/18986	0.0149254	2.64835	1.01752	0.315676	0.493022	0.462433	BMP6	1
GO:0060042	retina morphogenesis in camera-type eye	1/107	67/18986	0.0149254	2.64835	1.01752	0.315676	0.493022	0.462433	CALB1	1
GO:0016042	lipid catabolic process	3/107	351/18986	0.00854701	1.51657	0.73541	0.317312	0.49518	0.464457	PRKCE/IRS2/HPGD	3
GO:0016925	protein sumoylation	1/107	68/18986	0.0147059	2.6094	1.0009	0.319546	0.496686	0.465869	EGR2	1
GO:0045143	homologous chromosome segregation	1/107	68/18986	0.0147059	2.6094	1.0009	0.319546	0.496686	0.465869	TEX15	1
GO:0051055	negative regulation of lipid biosynthetic process	1/107	68/18986	0.0147059	2.6094	1.0009	0.319546	0.496686	0.465869	FGF19	1
GO:0060675	ureteric bud morphogenesis	1/107	68/18986	0.0147059	2.6094	1.0009	0.319546	0.496686	0.465869	CITED1	1
GO:0051701	biological process involved in interaction with host	2/107	204/18986	0.00980392	1.7396	0.799556	0.319553	0.496686	0.465869	CLEC4M/CR2	2
GO:0120032	regulation of plasma membrane bounded cell projection assembly	2/107	205/18986	0.0097561	1.73111	0.792339	0.321623	0.499503	0.468512	TENM2/CLRN1	2
GO:0030225	macrophage differentiation	1/107	69/18986	0.0144928	2.57158	0.984563	0.323395	0.499526	0.468533	INHBA	1
GO:0046888	negative regulation of hormone secretion	1/107	69/18986	0.0144928	2.57158	0.984563	0.323395	0.499526	0.468533	INHBA	1
GO:0060113	inner ear receptor cell differentiation	1/107	69/18986	0.0144928	2.57158	0.984563	0.323395	0.499526	0.468533	CLRN1	1
GO:0072171	mesonephric tubule morphogenesis	1/107	69/18986	0.0144928	2.57158	0.984563	0.323395	0.499526	0.468533	CITED1	1
GO:0042063	gliogenesis	3/107	355/18986	0.0084507	1.49949	0.7152	0.323488	0.499526	0.468533	EGR2/AREG/KLF15	3
GO:0002822	regulation of adaptive immune response based on somatic recombination of immune receptors built from immunoglobulin superfamily domains	2/107	206/18986	0.00970874	1.72271	0.78516	0.323691	0.499526	0.468533	IL12A/CR2	2
GO:0007623	circadian rhythm	2/107	206/18986	0.00970874	1.72271	0.78516	0.323691	0.499526	0.468533	BHLHE41/KCNH7	2
GO:0009749	response to glucose	2/107	206/18986	0.00970874	1.72271	0.78516	0.323691	0.499526	0.468533	PRKCE/IRS2	2
GO:0022408	negative regulation of cell-cell adhesion	2/107	207/18986	0.00966184	1.71439	0.778021	0.325757	0.500729	0.469662	BMP6/C1QTNF1	2
GO:0032271	regulation of protein polymerization	2/107	207/18986	0.00966184	1.71439	0.778021	0.325757	0.500729	0.469662	PRKCE/CDH5	2
GO:0050777	negative regulation of immune response	2/107	207/18986	0.00966184	1.71439	0.778021	0.325757	0.500729	0.469662	FGR/CR2	2
GO:0060491	regulation of cell projection assembly	2/107	207/18986	0.00966184	1.71439	0.778021	0.325757	0.500729	0.469662	TENM2/CLRN1	2
GO:2000241	regulation of reproductive process	2/107	207/18986	0.00966184	1.71439	0.778021	0.325757	0.500729	0.469662	INHBA/ARHGDIB	2
GO:0043525	positive regulation of neuron apoptotic process	1/107	70/18986	0.0142857	2.53485	0.968516	0.327222	0.501397	0.470288	PCSK9	1
GO:0046847	filopodium assembly	1/107	70/18986	0.0142857	2.53485	0.968516	0.327222	0.501397	0.470288	TENM2	1
GO:0072577	endothelial cell apoptotic process	1/107	70/18986	0.0142857	2.53485	0.968516	0.327222	0.501397	0.470288	CDH5	1
GO:1901019	regulation of calcium ion transmembrane transporter activity	1/107	70/18986	0.0142857	2.53485	0.968516	0.327222	0.501397	0.470288	CASQ2	1
GO:0001912	positive regulation of leukocyte mediated cytotoxicity	1/107	71/18986	0.0140845	2.49914	0.952746	0.331028	0.505239	0.473892	IL12A	1
GO:0003208	cardiac ventricle morphogenesis	1/107	71/18986	0.0140845	2.49914	0.952746	0.331028	0.505239	0.473892	FOXF1	1
GO:0051926	negative regulation of calcium ion transport	1/107	71/18986	0.0140845	2.49914	0.952746	0.331028	0.505239	0.473892	CASQ2	1
GO:0070830	bicellular tight junction assembly	1/107	71/18986	0.0140845	2.49914	0.952746	0.331028	0.505239	0.473892	CDH5	1
GO:0170040	proteinogenic amino acid catabolic process	1/107	71/18986	0.0140845	2.49914	0.952746	0.331028	0.505239	0.473892	UROC1	1
GO:0031589	cell-substrate adhesion	3/107	361/18986	0.00831025	1.47456	0.685344	0.332754	0.507475	0.47599	PRKCE/FOXF1/EGFLAM	3
GO:0009746	response to hexose	2/107	211/18986	0.00947867	1.68189	0.749847	0.334007	0.507828	0.476321	PRKCE/IRS2	2
GO:0043010	camera-type eye development	3/107	362/18986	0.00828729	1.47049	0.68042	0.334298	0.507828	0.476321	ZEB1/INHBA/CALB1	3
GO:0030032	lamellipodium assembly	1/107	72/18986	0.0138889	2.46443	0.937243	0.334812	0.507828	0.476321	CLRN1	1
GO:0032835	glomerulus development	1/107	72/18986	0.0138889	2.46443	0.937243	0.334812	0.507828	0.476321	KLF15	1
GO:0048002	antigen processing and presentation of peptide antigen	1/107	72/18986	0.0138889	2.46443	0.937243	0.334812	0.507828	0.476321	CLEC4M	1
GO:0051148	negative regulation of muscle cell differentiation	1/107	72/18986	0.0138889	2.46443	0.937243	0.334812	0.507828	0.476321	BHLHE41	1
GO:0140895	cell surface toll-like receptor signaling pathway	1/107	72/18986	0.0138889	2.46443	0.937243	0.334812	0.507828	0.476321	PRKCE	1
GO:0008016	regulation of heart contraction	2/107	213/18986	0.00938967	1.6661	0.735983	0.338122	0.509959	0.478319	HBEGF/CASQ2	2
GO:0032869	cellular response to insulin stimulus	2/107	213/18986	0.00938967	1.6661	0.735983	0.338122	0.509959	0.478319	IRS2/PCSK9	2
GO:0006879	intracellular iron ion homeostasis	1/107	73/18986	0.0136986	2.43067	0.921998	0.338575	0.509959	0.478319	BMP6	1
GO:0009988	cell-cell recognition	1/107	73/18986	0.0136986	2.43067	0.921998	0.338575	0.509959	0.478319	CLEC4M	1
GO:0015800	acidic amino acid transport	1/107	73/18986	0.0136986	2.43067	0.921998	0.338575	0.509959	0.478319	TRH	1
GO:0042698	ovulation cycle	1/107	73/18986	0.0136986	2.43067	0.921998	0.338575	0.509959	0.478319	INHBA	1
GO:0045109	intermediate filament organization	1/107	73/18986	0.0136986	2.43067	0.921998	0.338575	0.509959	0.478319	KRT9	1
GO:0045665	negative regulation of neuron differentiation	1/107	73/18986	0.0136986	2.43067	0.921998	0.338575	0.509959	0.478319	SOX3	1
GO:0061035	regulation of cartilage development	1/107	73/18986	0.0136986	2.43067	0.921998	0.338575	0.509959	0.478319	BMP6	1
GO:0006635	fatty acid beta-oxidation	1/107	74/18986	0.0135135	2.39783	0.907002	0.342317	0.511242	0.479523	IRS2	1
GO:0009064	glutamine family amino acid metabolic process	1/107	74/18986	0.0135135	2.39783	0.907002	0.342317	0.511242	0.479523	UROC1	1
GO:0014015	positive regulation of gliogenesis	1/107	74/18986	0.0135135	2.39783	0.907002	0.342317	0.511242	0.479523	EGR2	1
GO:0030514	negative regulation of BMP signaling pathway	1/107	74/18986	0.0135135	2.39783	0.907002	0.342317	0.511242	0.479523	BMPER	1
GO:0030858	positive regulation of epithelial cell differentiation	1/107	74/18986	0.0135135	2.39783	0.907002	0.342317	0.511242	0.479523	BMP6	1
GO:0032732	positive regulation of interleukin-1 production	1/107	74/18986	0.0135135	2.39783	0.907002	0.342317	0.511242	0.479523	SAA1	1
GO:0042490	mechanoreceptor differentiation	1/107	74/18986	0.0135135	2.39783	0.907002	0.342317	0.511242	0.479523	CLRN1	1
GO:0043112	receptor metabolic process	1/107	74/18986	0.0135135	2.39783	0.907002	0.342317	0.511242	0.479523	PCSK9	1
GO:0060420	regulation of heart growth	1/107	74/18986	0.0135135	2.39783	0.907002	0.342317	0.511242	0.479523	DUSP6	1
GO:0071260	cellular response to mechanical stimulus	1/107	74/18986	0.0135135	2.39783	0.907002	0.342317	0.511242	0.479523	BMP6	1
GO:2000379	positive regulation of reactive oxygen species metabolic process	1/107	74/18986	0.0135135	2.39783	0.907002	0.342317	0.511242	0.479523	PRKCE	1
GO:0050920	regulation of chemotaxis	2/107	216/18986	0.00925926	1.64296	0.715457	0.344279	0.513254	0.48141	THBS4/IL12A	2
GO:0002768	immune response-regulating cell surface receptor signaling pathway	3/107	369/18986	0.00813008	1.4426	0.646358	0.345103	0.513254	0.48141	PRKCE/FGR/CR2	3
GO:0002711	positive regulation of T cell mediated immunity	1/107	75/18986	0.0133333	2.36586	0.892249	0.346038	0.513254	0.48141	IL12A	1
GO:0032008	positive regulation of TOR signaling	1/107	75/18986	0.0133333	2.36586	0.892249	0.346038	0.513254	0.48141	STAMBPL1	1
GO:0032414	positive regulation of ion transmembrane transporter activity	1/107	75/18986	0.0133333	2.36586	0.892249	0.346038	0.513254	0.48141	ARC	1
GO:0046635	positive regulation of alpha-beta T cell activation	1/107	75/18986	0.0133333	2.36586	0.892249	0.346038	0.513254	0.48141	IL12A	1
GO:0061512	protein localization to cilium	1/107	75/18986	0.0133333	2.36586	0.892249	0.346038	0.513254	0.48141	DZIP1L	1
GO:0071496	cellular response to external stimulus	1/107	75/18986	0.0133333	2.36586	0.892249	0.346038	0.513254	0.48141	BMP6	1
GO:0170035	L-amino acid catabolic process	1/107	75/18986	0.0133333	2.36586	0.892249	0.346038	0.513254	0.48141	UROC1	1
GO:0060348	bone development	2/107	217/18986	0.00921659	1.63538	0.708686	0.346328	0.513293	0.481447	OGN/BMP6	2
GO:0034284	response to monosaccharide	2/107	218/18986	0.00917431	1.62788	0.701949	0.348375	0.515541	0.483555	PRKCE/IRS2	2
GO:0045216	cell-cell junction organization	2/107	218/18986	0.00917431	1.62788	0.701949	0.348375	0.515541	0.483555	CDH5/BMP6	2
GO:0006081	cellular aldehyde metabolic process	1/107	76/18986	0.0131579	2.33473	0.87773	0.349738	0.51599	0.483976	BMP6	1
GO:0045806	negative regulation of endocytosis	1/107	76/18986	0.0131579	2.33473	0.87773	0.349738	0.51599	0.483976	PCSK9	1
GO:0050709	negative regulation of protein secretion	1/107	76/18986	0.0131579	2.33473	0.87773	0.349738	0.51599	0.483976	IL12A	1
GO:2000242	negative regulation of reproductive process	1/107	76/18986	0.0131579	2.33473	0.87773	0.349738	0.51599	0.483976	ARHGDIB	1
GO:0071805	potassium ion transmembrane transport	2/107	219/18986	0.00913242	1.62045	0.695247	0.350419	0.516329	0.484294	CASQ2/KCNH7	2
GO:0006644	phospholipid metabolic process	3/107	374/18986	0.00802139	1.42331	0.622451	0.352814	0.516329	0.484294	FABP5/HYCC1/PCSK9	3
GO:0006801	superoxide metabolic process	1/107	77/18986	0.012987	2.30441	0.863439	0.353418	0.516329	0.484294	PRKCE	1
GO:0030239	myofibril assembly	1/107	77/18986	0.012987	2.30441	0.863439	0.353418	0.516329	0.484294	LDB3	1
GO:0032371	regulation of sterol transport	1/107	77/18986	0.012987	2.30441	0.863439	0.353418	0.516329	0.484294	PCSK9	1
GO:0032374	regulation of cholesterol transport	1/107	77/18986	0.012987	2.30441	0.863439	0.353418	0.516329	0.484294	PCSK9	1
GO:0032729	positive regulation of type II interferon production	1/107	77/18986	0.012987	2.30441	0.863439	0.353418	0.516329	0.484294	IL12A	1
GO:0045669	positive regulation of osteoblast differentiation	1/107	77/18986	0.012987	2.30441	0.863439	0.353418	0.516329	0.484294	BMP6	1
GO:0046425	regulation of receptor signaling pathway via JAK-STAT	1/107	77/18986	0.012987	2.30441	0.863439	0.353418	0.516329	0.484294	IL10RA	1
GO:0046470	phosphatidylcholine metabolic process	1/107	77/18986	0.012987	2.30441	0.863439	0.353418	0.516329	0.484294	FABP5	1
GO:0070527	platelet aggregation	1/107	77/18986	0.012987	2.30441	0.863439	0.353418	0.516329	0.484294	C1QTNF1	1
GO:0120192	tight junction assembly	1/107	77/18986	0.012987	2.30441	0.863439	0.353418	0.516329	0.484294	CDH5	1
GO:1904377	positive regulation of protein localization to cell periphery	1/107	77/18986	0.012987	2.30441	0.863439	0.353418	0.516329	0.484294	PRKCE	1
GO:0044282	small molecule catabolic process	3/107	375/18986	0.008	1.41951	0.61771	0.354355	0.517137	0.485052	IRS2/NPL/UROC1	3
GO:0002819	regulation of adaptive immune response	2/107	221/18986	0.00904977	1.60579	0.681943	0.354502	0.517137	0.485052	IL12A/CR2	2
GO:0007601	visual perception	2/107	222/18986	0.00900901	1.59855	0.675341	0.35654	0.51856	0.486387	CLRN1/CLIC5	2
GO:0009612	response to mechanical stimulus	2/107	222/18986	0.00900901	1.59855	0.675341	0.35654	0.51856	0.486387	BMP6/CALB1	2
GO:0031343	positive regulation of cell killing	1/107	78/18986	0.0128205	2.27486	0.849367	0.357076	0.51856	0.486387	IL12A	1
GO:0035924	cellular response to vascular endothelial growth factor stimulus	1/107	78/18986	0.0128205	2.27486	0.849367	0.357076	0.51856	0.486387	IL12A	1
GO:0061045	negative regulation of wound healing	1/107	78/18986	0.0128205	2.27486	0.849367	0.357076	0.51856	0.486387	C1QTNF1	1
GO:0072078	nephron tubule morphogenesis	1/107	78/18986	0.0128205	2.27486	0.849367	0.357076	0.51856	0.486387	CITED1	1
GO:0009755	hormone-mediated signaling pathway	2/107	223/18986	0.00896861	1.59138	0.668772	0.358576	0.519575	0.487338	SSTR2/TRH	2
GO:0043123	positive regulation of canonical NF-kappaB signal transduction	2/107	223/18986	0.00896861	1.59138	0.668772	0.358576	0.519575	0.487338	PRKCE/TNFSF15	2
GO:0045619	regulation of lymphocyte differentiation	2/107	223/18986	0.00896861	1.59138	0.668772	0.358576	0.519575	0.487338	ZEB1/INHBA	2
GO:0051651	maintenance of location in cell	2/107	224/18986	0.00892857	1.58428	0.662235	0.36061	0.519579	0.487342	PRKCE/CASQ2	2
GO:1901654	response to ketone	2/107	224/18986	0.00892857	1.58428	0.662235	0.36061	0.519579	0.487342	PRKCE/INHBA	2
GO:0001937	negative regulation of endothelial cell proliferation	1/107	79/18986	0.0126582	2.24607	0.835509	0.360715	0.519579	0.487342	IL12A	1
GO:0002752	cell surface pattern recognition receptor signaling pathway	1/107	79/18986	0.0126582	2.24607	0.835509	0.360715	0.519579	0.487342	PRKCE	1
GO:0042267	natural killer cell mediated cytotoxicity	1/107	79/18986	0.0126582	2.24607	0.835509	0.360715	0.519579	0.487342	IL12A	1
GO:0055117	regulation of cardiac muscle contraction	1/107	79/18986	0.0126582	2.24607	0.835509	0.360715	0.519579	0.487342	CASQ2	1
GO:0070373	negative regulation of ERK1 and ERK2 cascade	1/107	79/18986	0.0126582	2.24607	0.835509	0.360715	0.519579	0.487342	DUSP6	1
GO:1901568	fatty acid derivative metabolic process	1/107	79/18986	0.0126582	2.24607	0.835509	0.360715	0.519579	0.487342	HPGD	1
GO:0032259	methylation	2/107	225/18986	0.00888889	1.57724	0.655731	0.362641	0.521967	0.489582	PRDM12/FAM86B2	2
GO:0032272	negative regulation of protein polymerization	1/107	80/18986	0.0125	2.21799	0.821858	0.364333	0.522085	0.489693	CDH5	1
GO:0035914	skeletal muscle cell differentiation	1/107	80/18986	0.0125	2.21799	0.821858	0.364333	0.522085	0.489693	EGR2	1
GO:0043297	apical junction assembly	1/107	80/18986	0.0125	2.21799	0.821858	0.364333	0.522085	0.489693	CDH5	1
GO:0045685	regulation of glial cell differentiation	1/107	80/18986	0.0125	2.21799	0.821858	0.364333	0.522085	0.489693	EGR2	1
GO:0072088	nephron epithelium morphogenesis	1/107	80/18986	0.0125	2.21799	0.821858	0.364333	0.522085	0.489693	CITED1	1
GO:0140962	multicellular organismal-level chemical homeostasis	1/107	80/18986	0.0125	2.21799	0.821858	0.364333	0.522085	0.489693	BMP6	1
GO:0050953	sensory perception of light stimulus	2/107	226/18986	0.00884956	1.57026	0.649258	0.36467	0.522183	0.489785	CLRN1/CLIC5	2
GO:0050767	regulation of neurogenesis	3/107	383/18986	0.0078329	1.38986	0.580268	0.366668	0.524314	0.491783	EGR2/BHLHE41/OTP	3
GO:0007163	establishment or maintenance of cell polarity	2/107	227/18986	0.00881057	1.56334	0.642817	0.366696	0.524314	0.491783	CDH5/FOXF1	2
GO:0002260	lymphocyte homeostasis	1/107	81/18986	0.0123457	2.19061	0.808408	0.36793	0.524921	0.492353	LMO1	1
GO:0031397	negative regulation of protein ubiquitination	1/107	81/18986	0.0123457	2.19061	0.808408	0.36793	0.524921	0.492353	PRKCE	1
GO:0045921	positive regulation of exocytosis	1/107	81/18986	0.0123457	2.19061	0.808408	0.36793	0.524921	0.492353	FGR	1
GO:0046486	glycerolipid metabolic process	3/107	385/18986	0.00779221	1.38264	0.571037	0.369741	0.526934	0.494241	FABP5/HYCC1/PCSK9	3
GO:0045055	regulated exocytosis	2/107	229/18986	0.00873362	1.54969	0.630028	0.370742	0.526934	0.494241	FGR/FOXF1	2
GO:0002449	lymphocyte mediated immunity	3/107	386/18986	0.00777202	1.37906	0.566441	0.371277	0.526934	0.494241	IL12A/CALHM6/CR2	3
GO:0002224	toll-like receptor signaling pathway	1/107	82/18986	0.0121951	2.16389	0.795153	0.371508	0.526934	0.494241	PRKCE	1
GO:0010569	regulation of double-strand break repair via homologous recombination	1/107	82/18986	0.0121951	2.16389	0.795153	0.371508	0.526934	0.494241	TEX15	1
GO:0030500	regulation of bone mineralization	1/107	82/18986	0.0121951	2.16389	0.795153	0.371508	0.526934	0.494241	BMP6	1
GO:0061333	renal tubule morphogenesis	1/107	82/18986	0.0121951	2.16389	0.795153	0.371508	0.526934	0.494241	CITED1	1
GO:0072028	nephron morphogenesis	1/107	82/18986	0.0121951	2.16389	0.795153	0.371508	0.526934	0.494241	CITED1	1
GO:0042594	response to starvation	2/107	230/18986	0.00869565	1.54295	0.623679	0.372761	0.528015	0.495255	SSTR2/PCSK9	2
GO:0045089	positive regulation of innate immune response	3/107	387/18986	0.00775194	1.3755	0.561857	0.372812	0.528015	0.495255	PRKCE/IL12A/COLEC12	3
GO:0071674	mononuclear cell migration	2/107	231/18986	0.00865801	1.53627	0.617361	0.374778	0.528896	0.496081	IL12A/SAA1	2
GO:0007405	neuroblast proliferation	1/107	83/18986	0.0120482	2.13782	0.782088	0.375065	0.528896	0.496081	OTP	1
GO:0031424	keratinization	1/107	83/18986	0.0120482	2.13782	0.782088	0.375065	0.528896	0.496081	SPRR3	1
GO:0051952	regulation of amine transport	1/107	83/18986	0.0120482	2.13782	0.782088	0.375065	0.528896	0.496081	TRH	1
GO:0061053	somite development	1/107	83/18986	0.0120482	2.13782	0.782088	0.375065	0.528896	0.496081	FOXF1	1
GO:0120193	tight junction organization	1/107	83/18986	0.0120482	2.13782	0.782088	0.375065	0.528896	0.496081	CDH5	1
GO:0045926	negative regulation of growth	2/107	232/18986	0.00862069	1.52965	0.611072	0.376792	0.530562	0.497644	INHBA/NPR1	2
GO:0048588	developmental cell growth	2/107	232/18986	0.00862069	1.52965	0.611072	0.376792	0.530562	0.497644	FLRT3/FLRT1	2
GO:0008344	adult locomotory behavior	1/107	84/18986	0.0119048	2.11237	0.769208	0.378602	0.531573	0.498592	TRH	1
GO:0032411	positive regulation of transporter activity	1/107	84/18986	0.0119048	2.11237	0.769208	0.378602	0.531573	0.498592	ARC	1
GO:0035023	regulation of Rho protein signal transduction	1/107	84/18986	0.0119048	2.11237	0.769208	0.378602	0.531573	0.498592	ARHGDIB	1
GO:0070227	lymphocyte apoptotic process	1/107	84/18986	0.0119048	2.11237	0.769208	0.378602	0.531573	0.498592	IRS2	1
GO:0050863	regulation of T cell activation	3/107	393/18986	0.00763359	1.3545	0.534617	0.382007	0.534583	0.501416	ZEB1/LMO1/IL12A	3
GO:0002437	inflammatory response to antigenic stimulus	1/107	85/18986	0.0117647	2.08752	0.756506	0.38212	0.534583	0.501416	FGR	1
GO:0060337	type I interferon-mediated signaling pathway	1/107	85/18986	0.0117647	2.08752	0.756506	0.38212	0.534583	0.501416	CR2	1
GO:0097009	energy homeostasis	1/107	85/18986	0.0117647	2.08752	0.756506	0.38212	0.534583	0.501416	NMUR2	1
GO:0097061	dendritic spine organization	1/107	85/18986	0.0117647	2.08752	0.756506	0.38212	0.534583	0.501416	ARC	1
GO:0031331	positive regulation of cellular catabolic process	2/107	235/18986	0.00851064	1.51012	0.592383	0.382818	0.535175	0.501971	IRS2/PCSK9	2
GO:0002685	regulation of leukocyte migration	2/107	236/18986	0.00847458	1.50372	0.586212	0.384822	0.53716	0.503833	THBS4/IL12A	2
GO:0007193	adenylate cyclase-inhibiting G protein-coupled receptor signaling pathway	1/107	86/18986	0.0116279	2.06325	0.743978	0.385618	0.53716	0.503833	SSTR2	1
GO:0048678	response to axon injury	1/107	86/18986	0.0116279	2.06325	0.743978	0.385618	0.53716	0.503833	FLRT3	1
GO:0050871	positive regulation of B cell activation	1/107	86/18986	0.0116279	2.06325	0.743978	0.385618	0.53716	0.503833	IRS2	1
GO:0071357	cellular response to type I interferon	1/107	86/18986	0.0116279	2.06325	0.743978	0.385618	0.53716	0.503833	CR2	1
GO:0001892	embryonic placenta development	1/107	87/18986	0.0114943	2.03953	0.73162	0.389096	0.540458	0.506926	CITED1	1
GO:0005977	glycogen metabolic process	1/107	87/18986	0.0114943	2.03953	0.73162	0.389096	0.540458	0.506926	IRS2	1
GO:0007422	peripheral nervous system development	1/107	87/18986	0.0114943	2.03953	0.73162	0.389096	0.540458	0.506926	EGR2	1
GO:0099068	postsynapse assembly	1/107	87/18986	0.0114943	2.03953	0.73162	0.389096	0.540458	0.506926	SYNDIG1	1
GO:0015931	nucleobase-containing compound transport	2/107	239/18986	0.0083682	1.48485	0.567866	0.390815	0.542072	0.50844	ARC/CALHM6	2
GO:0016358	dendrite development	2/107	239/18986	0.0083682	1.48485	0.567866	0.390815	0.542072	0.50844	ARC/FLRT1	2
GO:0003407	neural retina development	1/107	88/18986	0.0113636	2.01636	0.719427	0.392555	0.543672	0.509941	CALB1	1
GO:0034103	regulation of tissue remodeling	1/107	88/18986	0.0113636	2.01636	0.719427	0.392555	0.543672	0.509941	THBS4	1
GO:0045017	glycerolipid biosynthetic process	2/107	240/18986	0.00833333	1.47866	0.561806	0.392808	0.543672	0.509941	FABP5/HYCC1	2
GO:0042445	hormone metabolic process	2/107	241/18986	0.00829876	1.47252	0.555774	0.394797	0.546038	0.512159	INHBA/BMP6	2
GO:0033077	T cell differentiation in thymus	1/107	89/18986	0.011236	1.9937	0.707394	0.395994	0.546141	0.512256	ZEB1	1
GO:0044042	glucan metabolic process	1/107	89/18986	0.011236	1.9937	0.707394	0.395994	0.546141	0.512256	IRS2	1
GO:0098586	cellular response to virus	1/107	89/18986	0.011236	1.9937	0.707394	0.395994	0.546141	0.512256	IL12A	1
GO:2000134	negative regulation of G1/S transition of mitotic cell cycle	1/107	89/18986	0.011236	1.9937	0.707394	0.395994	0.546141	0.512256	INHBA	1
GO:0008654	phospholipid biosynthetic process	2/107	243/18986	0.00823045	1.46041	0.543791	0.398767	0.54883	0.514778	FABP5/HYCC1	2
GO:0097529	myeloid leukocyte migration	2/107	243/18986	0.00823045	1.46041	0.543791	0.398767	0.54883	0.514778	THBS4/SAA1	2
GO:0050900	leukocyte migration	3/107	404/18986	0.00742574	1.31762	0.4858	0.39879	0.54883	0.514778	THBS4/IL12A/SAA1	3
GO:1901264	carbohydrate derivative transport	1/107	90/18986	0.0111111	1.97155	0.695517	0.399414	0.548913	0.514856	CALHM6	1
GO:1901379	regulation of potassium ion transmembrane transport	1/107	90/18986	0.0111111	1.97155	0.695517	0.399414	0.548913	0.514856	CASQ2	1
GO:0097006	regulation of plasma lipoprotein particle levels	1/107	91/18986	0.010989	1.94988	0.683793	0.402815	0.552806	0.518507	PCSK9	1
GO:0097581	lamellipodium organization	1/107	91/18986	0.010989	1.94988	0.683793	0.402815	0.552806	0.518507	CLRN1	1
GO:0099173	postsynapse organization	2/107	246/18986	0.00813008	1.4426	0.526014	0.4047	0.554445	0.520045	SYNDIG1/ARC	2
GO:0001558	regulation of cell growth	3/107	408/18986	0.00735294	1.3047	0.468394	0.404864	0.554445	0.520045	INHBA/HBEGF/NPR1	3
GO:0010959	regulation of metal ion transport	3/107	408/18986	0.00735294	1.3047	0.468394	0.404864	0.554445	0.520045	PRKCE/CASQ2/PCSK9	3
GO:0032273	positive regulation of protein polymerization	1/107	92/18986	0.0108696	1.92869	0.672217	0.406197	0.554578	0.52017	PRKCE	1
GO:0034340	response to type I interferon	1/107	92/18986	0.0108696	1.92869	0.672217	0.406197	0.554578	0.52017	CR2	1
GO:0060021	roof of mouth development	1/107	92/18986	0.0108696	1.92869	0.672217	0.406197	0.554578	0.52017	INHBA	1
GO:2000243	positive regulation of reproductive process	1/107	92/18986	0.0108696	1.92869	0.672217	0.406197	0.554578	0.52017	INHBA	1
GO:0002573	myeloid leukocyte differentiation	2/107	247/18986	0.00809717	1.43676	0.520141	0.406671	0.554578	0.52017	INHBA/CALCR	2
GO:0050769	positive regulation of neurogenesis	2/107	247/18986	0.00809717	1.43676	0.520141	0.406671	0.554578	0.52017	EGR2/OTP	2
GO:0006813	potassium ion transport	2/107	248/18986	0.00806452	1.43096	0.514293	0.40864	0.556482	0.521956	CASQ2/KCNH7	2
GO:0022604	regulation of cell morphogenesis	2/107	248/18986	0.00806452	1.43096	0.514293	0.40864	0.556482	0.521956	ARC/FGR	2
GO:0043543	protein acylation	1/107	93/18986	0.0107527	1.90795	0.660785	0.40956	0.556955	0.5224	KLF15	1
GO:2000106	regulation of leukocyte apoptotic process	1/107	93/18986	0.0107527	1.90795	0.660785	0.40956	0.556955	0.5224	IRS2	1
GO:0021954	central nervous system neuron development	1/107	94/18986	0.0106383	1.88765	0.649494	0.412904	0.559158	0.524466	LHX6	1
GO:0045104	intermediate filament cytoskeleton organization	1/107	94/18986	0.0106383	1.88765	0.649494	0.412904	0.559158	0.524466	KRT9	1
GO:0046889	positive regulation of lipid biosynthetic process	1/107	94/18986	0.0106383	1.88765	0.649494	0.412904	0.559158	0.524466	BMP6	1
GO:0071677	positive regulation of mononuclear cell migration	1/107	94/18986	0.0106383	1.88765	0.649494	0.412904	0.559158	0.524466	IL12A	1
GO:1903321	negative regulation of protein modification by small protein conjugation or removal	1/107	94/18986	0.0106383	1.88765	0.649494	0.412904	0.559158	0.524466	PRKCE	1
GO:1904705	regulation of vascular associated smooth muscle cell proliferation	1/107	94/18986	0.0106383	1.88765	0.649494	0.412904	0.559158	0.524466	HPGD	1
GO:0009913	epidermal cell differentiation	2/107	251/18986	0.00796813	1.41386	0.496901	0.414526	0.560929	0.526127	CLRN1/SPRR3	2
GO:0010660	regulation of muscle cell apoptotic process	1/107	95/18986	0.0105263	1.86778	0.638341	0.416229	0.560929	0.526127	IL12A	1
GO:0032465	regulation of cytokinesis	1/107	95/18986	0.0105263	1.86778	0.638341	0.416229	0.560929	0.526127	PRKCE	1
GO:0045103	intermediate filament-based process	1/107	95/18986	0.0105263	1.86778	0.638341	0.416229	0.560929	0.526127	KRT9	1
GO:0048704	embryonic skeletal system morphogenesis	1/107	95/18986	0.0105263	1.86778	0.638341	0.416229	0.560929	0.526127	ZEB1	1
GO:0055006	cardiac cell development	1/107	95/18986	0.0105263	1.86778	0.638341	0.416229	0.560929	0.526127	INHBA	1
GO:0106027	neuron projection organization	1/107	95/18986	0.0105263	1.86778	0.638341	0.416229	0.560929	0.526127	ARC	1
GO:0060047	heart contraction	2/107	253/18986	0.00790514	1.40268	0.48543	0.418435	0.562657	0.527748	HBEGF/CASQ2	2
GO:0001942	hair follicle development	1/107	96/18986	0.0104167	1.84833	0.627321	0.419535	0.562657	0.527748	INHBA	1
GO:0010507	negative regulation of autophagy	1/107	96/18986	0.0104167	1.84833	0.627321	0.419535	0.562657	0.527748	IL10RA	1
GO:0015837	amine transport	1/107	96/18986	0.0104167	1.84833	0.627321	0.419535	0.562657	0.527748	TRH	1
GO:0072091	regulation of stem cell proliferation	1/107	96/18986	0.0104167	1.84833	0.627321	0.419535	0.562657	0.527748	CITED1	1
GO:1904892	regulation of receptor signaling pathway via STAT	1/107	96/18986	0.0104167	1.84833	0.627321	0.419535	0.562657	0.527748	IL10RA	1
GO:1990874	vascular associated smooth muscle cell proliferation	1/107	96/18986	0.0104167	1.84833	0.627321	0.419535	0.562657	0.527748	HPGD	1
GO:0043523	regulation of neuron apoptotic process	2/107	254/18986	0.00787402	1.39716	0.479731	0.420384	0.56302	0.528088	CITED1/PCSK9	2
GO:0090257	regulation of muscle system process	2/107	254/18986	0.00787402	1.39716	0.479731	0.420384	0.56302	0.528088	NMUR2/CASQ2	2
GO:0045132	meiotic chromosome segregation	1/107	97/18986	0.0103093	1.82927	0.616432	0.422823	0.564732	0.529694	TEX15	1
GO:0046330	positive regulation of JNK cascade	1/107	97/18986	0.0103093	1.82927	0.616432	0.422823	0.564732	0.529694	FGF19	1
GO:0051153	regulation of striated muscle cell differentiation	1/107	97/18986	0.0103093	1.82927	0.616432	0.422823	0.564732	0.529694	BHLHE41	1
GO:0061337	cardiac conduction	1/107	97/18986	0.0103093	1.82927	0.616432	0.422823	0.564732	0.529694	CASQ2	1
GO:0001910	regulation of leukocyte mediated cytotoxicity	1/107	98/18986	0.0102041	1.8106	0.605671	0.426093	0.566827	0.531659	IL12A	1
GO:1901606	alpha-amino acid catabolic process	1/107	98/18986	0.0102041	1.8106	0.605671	0.426093	0.566827	0.531659	UROC1	1
GO:1901874	negative regulation of post-translational protein modification	1/107	98/18986	0.0102041	1.8106	0.605671	0.426093	0.566827	0.531659	PRKCE	1
GO:1902807	negative regulation of cell cycle G1/S phase transition	1/107	98/18986	0.0102041	1.8106	0.605671	0.426093	0.566827	0.531659	INHBA	1
GO:0031669	cellular response to nutrient levels	2/107	257/18986	0.0077821	1.38085	0.462776	0.426213	0.566827	0.531659	INHBA/PCSK9	2
GO:0051924	regulation of calcium ion transport	2/107	258/18986	0.00775194	1.3755	0.457172	0.428149	0.566827	0.531659	PRKCE/CASQ2	2
GO:0099003	vesicle-mediated transport in synapse	2/107	258/18986	0.00775194	1.3755	0.457172	0.428149	0.566827	0.531659	SYNDIG1/ARC	2
GO:0006637	acyl-CoA metabolic process	1/107	99/18986	0.010101	1.79232	0.595034	0.429344	0.566827	0.531659	ACSM5	1
GO:0016579	protein deubiquitination	1/107	99/18986	0.010101	1.79232	0.595034	0.429344	0.566827	0.531659	STAMBPL1	1
GO:0022404	molting cycle process	1/107	99/18986	0.010101	1.79232	0.595034	0.429344	0.566827	0.531659	INHBA	1
GO:0022405	hair cycle process	1/107	99/18986	0.010101	1.79232	0.595034	0.429344	0.566827	0.531659	INHBA	1
GO:0035383	thioester metabolic process	1/107	99/18986	0.010101	1.79232	0.595034	0.429344	0.566827	0.531659	ACSM5	1
GO:0042542	response to hydrogen peroxide	1/107	99/18986	0.010101	1.79232	0.595034	0.429344	0.566827	0.531659	AREG	1
GO:0043280	positive regulation of cysteine-type endopeptidase activity involved in apoptotic process	1/107	99/18986	0.010101	1.79232	0.595034	0.429344	0.566827	0.531659	TNFSF15	1
GO:0045638	negative regulation of myeloid cell differentiation	1/107	99/18986	0.010101	1.79232	0.595034	0.429344	0.566827	0.531659	INHBA	1
GO:0060996	dendritic spine development	1/107	99/18986	0.010101	1.79232	0.595034	0.429344	0.566827	0.531659	ARC	1
GO:1903432	regulation of TORC1 signaling	1/107	99/18986	0.010101	1.79232	0.595034	0.429344	0.566827	0.531659	STAMBPL1	1
GO:0045927	positive regulation of growth	2/107	259/18986	0.00772201	1.37019	0.451591	0.430082	0.567417	0.532212	HBEGF/FOXS1	2
GO:0002220	innate immune response activating cell surface receptor signaling pathway	1/107	100/18986	0.01	1.77439	0.584519	0.432577	0.568013	0.532771	PRKCE	1
GO:0006493	protein O-linked glycosylation	1/107	100/18986	0.01	1.77439	0.584519	0.432577	0.568013	0.532771	CRPPA	1
GO:0021675	nerve development	1/107	100/18986	0.01	1.77439	0.584519	0.432577	0.568013	0.532771	EGR2	1
GO:0031110	regulation of microtubule polymerization or depolymerization	1/107	100/18986	0.01	1.77439	0.584519	0.432577	0.568013	0.532771	CDH5	1
GO:0043648	dicarboxylic acid metabolic process	1/107	100/18986	0.01	1.77439	0.584519	0.432577	0.568013	0.532771	UROC1	1
GO:0060349	bone morphogenesis	1/107	100/18986	0.01	1.77439	0.584519	0.432577	0.568013	0.532771	BMP6	1
GO:0060419	heart growth	1/107	100/18986	0.01	1.77439	0.584519	0.432577	0.568013	0.532771	DUSP6	1
GO:0006942	regulation of striated muscle contraction	1/107	101/18986	0.00990099	1.75682	0.574123	0.435792	0.569251	0.533932	CASQ2	1
GO:0010657	muscle cell apoptotic process	1/107	101/18986	0.00990099	1.75682	0.574123	0.435792	0.569251	0.533932	IL12A	1
GO:0034109	homotypic cell-cell adhesion	1/107	101/18986	0.00990099	1.75682	0.574123	0.435792	0.569251	0.533932	C1QTNF1	1
GO:0046785	microtubule polymerization	1/107	101/18986	0.00990099	1.75682	0.574123	0.435792	0.569251	0.533932	CDH5	1
GO:0051100	negative regulation of binding	1/107	101/18986	0.00990099	1.75682	0.574123	0.435792	0.569251	0.533932	PCSK9	1
GO:0120162	positive regulation of cold-induced thermogenesis	1/107	101/18986	0.00990099	1.75682	0.574123	0.435792	0.569251	0.533932	FABP5	1
GO:1903035	negative regulation of response to wounding	1/107	101/18986	0.00990099	1.75682	0.574123	0.435792	0.569251	0.533932	C1QTNF1	1
GO:0003015	heart process	2/107	262/18986	0.00763359	1.3545	0.434984	0.43586	0.569251	0.533932	HBEGF/CASQ2	2
GO:0003300	cardiac muscle hypertrophy	1/107	102/18986	0.00980392	1.7396	0.563843	0.438988	0.571419	0.535966	KLF15	1
GO:0006112	energy reserve metabolic process	1/107	102/18986	0.00980392	1.7396	0.563843	0.438988	0.571419	0.535966	IRS2	1
GO:0042157	lipoprotein metabolic process	1/107	102/18986	0.00980392	1.7396	0.563843	0.438988	0.571419	0.535966	PCSK9	1
GO:0048534	hematopoietic or lymphoid organ development	1/107	102/18986	0.00980392	1.7396	0.563843	0.438988	0.571419	0.535966	RCBTB2	1
GO:0050764	regulation of phagocytosis	1/107	102/18986	0.00980392	1.7396	0.563843	0.438988	0.571419	0.535966	FGR	1
GO:0008585	female gonad development	1/107	103/18986	0.00970874	1.72271	0.553676	0.442167	0.573942	0.538333	INHBA	1
GO:0034308	primary alcohol metabolic process	1/107	103/18986	0.00970874	1.72271	0.553676	0.442167	0.573942	0.538333	BMP6	1
GO:0046620	regulation of organ growth	1/107	103/18986	0.00970874	1.72271	0.553676	0.442167	0.573942	0.538333	DUSP6	1
GO:0070167	regulation of biomineral tissue development	1/107	103/18986	0.00970874	1.72271	0.553676	0.442167	0.573942	0.538333	BMP6	1
GO:0043254	regulation of protein-containing complex assembly	3/107	433/18986	0.00692841	1.22937	0.363483	0.442401	0.573942	0.538333	PRKCE/CDH5/INSM1	3
GO:0010001	glial cell differentiation	2/107	267/18986	0.00749064	1.32913	0.407749	0.445421	0.57709	0.541285	EGR2/KLF15	2
GO:1903522	regulation of blood circulation	2/107	267/18986	0.00749064	1.32913	0.407749	0.445421	0.57709	0.541285	HBEGF/CASQ2	2
GO:1901888	regulation of cell junction assembly	2/107	268/18986	0.00746269	1.32417	0.402368	0.447322	0.57873	0.542824	SYNDIG1/FLRT3	2
GO:0002027	regulation of heart rate	1/107	105/18986	0.00952381	1.6899	0.533672	0.448471	0.57873	0.542824	CASQ2	1
GO:0014897	striated muscle hypertrophy	1/107	105/18986	0.00952381	1.6899	0.533672	0.448471	0.57873	0.542824	KLF15	1
GO:0015914	phospholipid transport	1/107	105/18986	0.00952381	1.6899	0.533672	0.448471	0.57873	0.542824	ATP10D	1
GO:0043255	regulation of carbohydrate biosynthetic process	1/107	105/18986	0.00952381	1.6899	0.533672	0.448471	0.57873	0.542824	IRS2	1
GO:1905477	positive regulation of protein localization to membrane	1/107	105/18986	0.00952381	1.6899	0.533672	0.448471	0.57873	0.542824	PRKCE	1
GO:0007416	synapse assembly	2/107	269/18986	0.00743494	1.31925	0.397007	0.44922	0.579312	0.54337	SYNDIG1/FLRT3	2
GO:0006835	dicarboxylic acid transport	1/107	106/18986	0.00943396	1.67396	0.52383	0.451597	0.581222	0.545161	TRH	1
GO:0009062	fatty acid catabolic process	1/107	106/18986	0.00943396	1.67396	0.52383	0.451597	0.581222	0.545161	IRS2	1
GO:0042632	cholesterol homeostasis	1/107	106/18986	0.00943396	1.67396	0.52383	0.451597	0.581222	0.545161	PCSK9	1
GO:0014896	muscle hypertrophy	1/107	107/18986	0.00934579	1.65831	0.514092	0.454705	0.582382	0.546249	KLF15	1
GO:0019395	fatty acid oxidation	1/107	107/18986	0.00934579	1.65831	0.514092	0.454705	0.582382	0.546249	IRS2	1
GO:0032526	response to retinoic acid	1/107	107/18986	0.00934579	1.65831	0.514092	0.454705	0.582382	0.546249	BMP6	1
GO:0043266	regulation of potassium ion transport	1/107	107/18986	0.00934579	1.65831	0.514092	0.454705	0.582382	0.546249	CASQ2	1
GO:0045639	positive regulation of myeloid cell differentiation	1/107	107/18986	0.00934579	1.65831	0.514092	0.454705	0.582382	0.546249	INHBA	1
GO:0046545	development of primary female sexual characteristics	1/107	107/18986	0.00934579	1.65831	0.514092	0.454705	0.582382	0.546249	INHBA	1
GO:0055092	sterol homeostasis	1/107	107/18986	0.00934579	1.65831	0.514092	0.454705	0.582382	0.546249	PCSK9	1
GO:0002699	positive regulation of immune effector process	2/107	272/18986	0.00735294	1.3047	0.38105	0.454892	0.582382	0.546249	FGR/IL12A	2
GO:0002709	regulation of T cell mediated immunity	1/107	108/18986	0.00925926	1.64296	0.504456	0.457795	0.58456	0.548292	IL12A	1
GO:0003333	amino acid transmembrane transport	1/107	108/18986	0.00925926	1.64296	0.504456	0.457795	0.58456	0.548292	SLC6A19	1
GO:0006641	triglyceride metabolic process	1/107	108/18986	0.00925926	1.64296	0.504456	0.457795	0.58456	0.548292	PCSK9	1
GO:2001257	regulation of cation channel activity	1/107	108/18986	0.00925926	1.64296	0.504456	0.457795	0.58456	0.548292	CASQ2	1
GO:0021549	cerebellum development	1/107	109/18986	0.00917431	1.62788	0.494918	0.460869	0.588099	0.551611	SSTR2	1
GO:0071695	anatomical structure maturation	2/107	276/18986	0.00724638	1.28579	0.36006	0.462404	0.589671	0.553086	LHX6/CDH5	2
GO:0002526	acute inflammatory response	1/107	110/18986	0.00909091	1.61308	0.485478	0.463925	0.59045	0.553816	SAA1	1
GO:0072676	lymphocyte migration	1/107	110/18986	0.00909091	1.61308	0.485478	0.463925	0.59045	0.553816	SAA1	1
GO:1901655	cellular response to ketone	1/107	110/18986	0.00909091	1.61308	0.485478	0.463925	0.59045	0.553816	PRKCE	1
GO:0034976	response to endoplasmic reticulum stress	2/107	277/18986	0.00722022	1.28115	0.354863	0.464272	0.590506	0.553869	THBS4/ERP27	2
GO:0002221	pattern recognition receptor signaling pathway	2/107	278/18986	0.00719424	1.27654	0.349685	0.466137	0.59238	0.555627	PRKCE/COLEC12	2
GO:0007229	integrin-mediated signaling pathway	1/107	111/18986	0.00900901	1.59855	0.476132	0.466963	0.59238	0.555627	FGR	1
GO:0009063	amino acid catabolic process	1/107	111/18986	0.00900901	1.59855	0.476132	0.466963	0.59238	0.555627	UROC1	1
GO:0032963	collagen metabolic process	1/107	111/18986	0.00900901	1.59855	0.476132	0.466963	0.59238	0.555627	INHBA	1
GO:0014013	regulation of gliogenesis	1/107	112/18986	0.00892857	1.58428	0.46688	0.469985	0.59389	0.557043	EGR2	1
GO:0022600	digestive system process	1/107	112/18986	0.00892857	1.58428	0.46688	0.469985	0.59389	0.557043	IL10RA	1
GO:0030316	osteoclast differentiation	1/107	112/18986	0.00892857	1.58428	0.46688	0.469985	0.59389	0.557043	CALCR	1
GO:0031341	regulation of cell killing	1/107	112/18986	0.00892857	1.58428	0.46688	0.469985	0.59389	0.557043	IL12A	1
GO:0042116	macrophage activation	1/107	112/18986	0.00892857	1.58428	0.46688	0.469985	0.59389	0.557043	PRKCE	1
GO:0140888	interferon-mediated signaling pathway	1/107	112/18986	0.00892857	1.58428	0.46688	0.469985	0.59389	0.557043	CR2	1
GO:0016032	viral process	3/107	452/18986	0.00663717	1.17769	0.287849	0.470329	0.593939	0.557089	CLEC4M/SLC6A19/CR2	3
GO:0021537	telencephalon development	2/107	281/18986	0.00711744	1.26291	0.334267	0.471709	0.595296	0.558361	LHX6/INHBA	2
GO:0001776	leukocyte homeostasis	1/107	113/18986	0.00884956	1.57026	0.457719	0.47299	0.595753	0.55879	LMO1	1
GO:0005976	polysaccharide metabolic process	1/107	113/18986	0.00884956	1.57026	0.457719	0.47299	0.595753	0.55879	IRS2	1
GO:0038202	TORC1 signaling	1/107	113/18986	0.00884956	1.57026	0.457719	0.47299	0.595753	0.55879	STAMBPL1	1
GO:0014812	muscle cell migration	1/107	114/18986	0.00877193	1.55648	0.448647	0.475978	0.597968	0.560868	THBS4	1
GO:0034440	lipid oxidation	1/107	114/18986	0.00877193	1.55648	0.448647	0.475978	0.597968	0.560868	IRS2	1
GO:0043473	pigmentation	1/107	114/18986	0.00877193	1.55648	0.448647	0.475978	0.597968	0.560868	CITED1	1
GO:2001056	positive regulation of cysteine-type endopeptidase activity	1/107	114/18986	0.00877193	1.55648	0.448647	0.475978	0.597968	0.560868	TNFSF15	1
GO:0007409	axonogenesis	3/107	459/18986	0.00653595	1.15973	0.2608	0.480465	0.602691	0.565298	FLRT3/EGR2/CRPPA	3
GO:0002062	chondrocyte differentiation	1/107	116/18986	0.00862069	1.52965	0.430763	0.481903	0.602691	0.565298	BMP6	1
GO:0006661	phosphatidylinositol biosynthetic process	1/107	116/18986	0.00862069	1.52965	0.430763	0.481903	0.602691	0.565298	HYCC1	1
GO:0043393	regulation of protein binding	1/107	116/18986	0.00862069	1.52965	0.430763	0.481903	0.602691	0.565298	PCSK9	1
GO:0070555	response to interleukin-1	1/107	116/18986	0.00862069	1.52965	0.430763	0.481903	0.602691	0.565298	CITED1	1
GO:0010720	positive regulation of cell development	3/107	460/18986	0.00652174	1.15721	0.25697	0.481905	0.602691	0.565298	CDH5/EGR2/OTP	3
GO:0043549	regulation of kinase activity	3/107	460/18986	0.00652174	1.15721	0.25697	0.481905	0.602691	0.565298	IRS2/FGR/TNFSF15	3
GO:0043542	endothelial cell migration	2/107	287/18986	0.00696864	1.23651	0.303941	0.482749	0.603359	0.565924	CDH5/BMPER	2
GO:0099072	regulation of postsynaptic membrane neurotransmitter receptor levels	1/107	117/18986	0.00854701	1.51657	0.421948	0.484841	0.604808	0.567284	ARC	1
GO:1902106	negative regulation of leukocyte differentiation	1/107	117/18986	0.00854701	1.51657	0.421948	0.484841	0.604808	0.567284	INHBA	1
GO:1903076	regulation of protein localization to plasma membrane	1/107	117/18986	0.00854701	1.51657	0.421948	0.484841	0.604808	0.567284	PRKCE	1
GO:0019882	antigen processing and presentation	1/107	118/18986	0.00847458	1.50372	0.413216	0.487762	0.607284	0.569606	CLEC4M	1
GO:0045833	negative regulation of lipid metabolic process	1/107	118/18986	0.00847458	1.50372	0.413216	0.487762	0.607284	0.569606	FGF19	1
GO:0070646	protein modification by small protein removal	1/107	118/18986	0.00847458	1.50372	0.413216	0.487762	0.607284	0.569606	STAMBPL1	1
GO:0007015	actin filament organization	3/107	465/18986	0.00645161	1.14477	0.237946	0.489082	0.608538	0.570782	PRKCE/CALD1/CLRN1	3
GO:0042391	regulation of membrane potential	3/107	466/18986	0.00643777	1.14231	0.234166	0.490511	0.609342	0.571536	INSYN2A/CASQ2/KCNH7	3
GO:0022037	metencephalon development	1/107	119/18986	0.00840336	1.49109	0.404564	0.490667	0.609342	0.571536	SSTR2	1
GO:0099565	chemical synaptic transmission, postsynaptic	1/107	119/18986	0.00840336	1.49109	0.404564	0.490667	0.609342	0.571536	INSYN2A	1
GO:0007548	sex differentiation	2/107	292/18986	0.00684932	1.21534	0.279169	0.491841	0.61041	0.572538	INHBA/BMP6	2
GO:0006720	isoprenoid metabolic process	1/107	120/18986	0.00833333	1.47866	0.395992	0.493556	0.610979	0.573072	CRPPA	1
GO:0042303	molting cycle	1/107	120/18986	0.00833333	1.47866	0.395992	0.493556	0.610979	0.573072	INHBA	1
GO:0042633	hair cycle	1/107	120/18986	0.00833333	1.47866	0.395992	0.493556	0.610979	0.573072	INHBA	1
GO:1902414	protein localization to cell junction	1/107	120/18986	0.00833333	1.47866	0.395992	0.493556	0.610979	0.573072	CDH5	1
GO:0006650	glycerophospholipid metabolic process	2/107	294/18986	0.00680272	1.20707	0.269383	0.495451	0.612935	0.574906	FABP5/HYCC1	2
GO:0034341	response to type II interferon	1/107	121/18986	0.00826446	1.46644	0.387497	0.496428	0.613365	0.575309	CITED1	1
GO:0051224	negative regulation of protein transport	1/107	121/18986	0.00826446	1.46644	0.387497	0.496428	0.613365	0.575309	IL12A	1
GO:0072659	protein localization to plasma membrane	2/107	295/18986	0.00677966	1.20298	0.264516	0.497249	0.613989	0.575895	PRKCE/HYCC1	2
GO:0031329	regulation of cellular catabolic process	3/107	472/18986	0.00635593	1.12779	0.211657	0.499049	0.614164	0.576059	IRS2/IL10RA/PCSK9	3
GO:0031330	negative regulation of cellular catabolic process	1/107	122/18986	0.00819672	1.45442	0.379078	0.499284	0.614164	0.576059	IL10RA	1
GO:0043500	muscle adaptation	1/107	122/18986	0.00819672	1.45442	0.379078	0.499284	0.614164	0.576059	KLF15	1
GO:0046634	regulation of alpha-beta T cell activation	1/107	122/18986	0.00819672	1.45442	0.379078	0.499284	0.614164	0.576059	IL12A	1
GO:0046660	female sex differentiation	1/107	122/18986	0.00819672	1.45442	0.379078	0.499284	0.614164	0.576059	INHBA	1
GO:0071887	leukocyte apoptotic process	1/107	122/18986	0.00819672	1.45442	0.379078	0.499284	0.614164	0.576059	IRS2	1
GO:0002758	innate immune response-activating signaling pathway	2/107	297/18986	0.00673401	1.19488	0.254832	0.500834	0.615681	0.577482	PRKCE/COLEC12	2
GO:0030301	cholesterol transport	1/107	123/18986	0.00813008	1.4426	0.370734	0.502124	0.616878	0.578604	PCSK9	1
GO:1903707	negative regulation of hemopoiesis	1/107	124/18986	0.00806452	1.43096	0.362463	0.504949	0.619956	0.581492	INHBA	1
GO:0051056	regulation of small GTPase mediated signal transduction	2/107	300/18986	0.00666667	1.18293	0.240431	0.506182	0.621078	0.582544	ARHGDIB/ARHGAP9	2
GO:0062014	negative regulation of small molecule metabolic process	1/107	125/18986	0.008	1.41951	0.354264	0.507757	0.622618	0.583989	FGF19	1
GO:0002718	regulation of cytokine production involved in immune response	1/107	126/18986	0.00793651	1.40825	0.346136	0.51055	0.625648	0.586831	CALHM6	1
GO:0002367	cytokine production involved in immune response	1/107	127/18986	0.00787402	1.39716	0.338077	0.513326	0.627865	0.58891	CALHM6	1
GO:0006805	xenobiotic metabolic process	1/107	127/18986	0.00787402	1.39716	0.338077	0.513326	0.627865	0.58891	SLCO2B1	1
GO:0022612	gland morphogenesis	1/107	127/18986	0.00787402	1.39716	0.338077	0.513326	0.627865	0.58891	AREG	1
GO:0043122	regulation of canonical NF-kappaB signal transduction	2/107	305/18986	0.00655738	1.16354	0.216756	0.515012	0.629531	0.590473	PRKCE/TNFSF15	2
GO:0003231	cardiac ventricle development	1/107	128/18986	0.0078125	1.38624	0.330086	0.516088	0.630054	0.590963	FOXF1	1
GO:0072089	stem cell proliferation	1/107	128/18986	0.0078125	1.38624	0.330086	0.516088	0.630054	0.590963	CITED1	1
GO:0051402	neuron apoptotic process	2/107	307/18986	0.00651466	1.15596	0.207397	0.518515	0.632613	0.593363	CITED1/PCSK9	2
GO:0003206	cardiac chamber morphogenesis	1/107	129/18986	0.00775194	1.3755	0.322162	0.518833	0.632613	0.593363	FOXF1	1
GO:0002761	regulation of myeloid leukocyte differentiation	1/107	130/18986	0.00769231	1.36492	0.314303	0.521564	0.633165	0.593881	INHBA	1
GO:0008286	insulin receptor signaling pathway	1/107	130/18986	0.00769231	1.36492	0.314303	0.521564	0.633165	0.593881	IRS2	1
GO:0019079	viral genome replication	1/107	130/18986	0.00769231	1.36492	0.314303	0.521564	0.633165	0.593881	CLEC4M	1
GO:0021987	cerebral cortex development	1/107	130/18986	0.00769231	1.36492	0.314303	0.521564	0.633165	0.593881	LHX6	1
GO:0032612	interleukin-1 production	1/107	130/18986	0.00769231	1.36492	0.314303	0.521564	0.633165	0.593881	SAA1	1
GO:0032652	regulation of interleukin-1 production	1/107	130/18986	0.00769231	1.36492	0.314303	0.521564	0.633165	0.593881	SAA1	1
GO:0043414	macromolecule methylation	1/107	130/18986	0.00769231	1.36492	0.314303	0.521564	0.633165	0.593881	PRDM12	1
GO:0048608	reproductive structure development	2/107	309/18986	0.00647249	1.14847	0.1981	0.522002	0.633302	0.59401	INHBA/BMP6	2
GO:0072329	monocarboxylic acid catabolic process	1/107	131/18986	0.00763359	1.3545	0.30651	0.524279	0.635667	0.596228	IRS2	1
GO:0007264	small GTPase-mediated signal transduction	3/107	491/18986	0.00610998	1.08415	0.142225	0.525608	0.636882	0.597368	ARHGDIB/ARHGAP9/SH2D3C	3
GO:0003014	renal system process	1/107	132/18986	0.00757576	1.34424	0.298779	0.526978	0.636956	0.597437	NPR1	1
GO:0007127	meiosis I	1/107	132/18986	0.00757576	1.34424	0.298779	0.526978	0.636956	0.597437	TEX15	1
GO:0015918	sterol transport	1/107	132/18986	0.00757576	1.34424	0.298779	0.526978	0.636956	0.597437	PCSK9	1
GO:0098773	skin epidermis development	1/107	132/18986	0.00757576	1.34424	0.298779	0.526978	0.636956	0.597437	INHBA	1
GO:0061458	reproductive system development	2/107	313/18986	0.00638978	1.1338	0.179688	0.528926	0.638913	0.599273	INHBA/BMP6	2
GO:0002824	positive regulation of adaptive immune response based on somatic recombination of immune receptors built from immunoglobulin superfamily domains	1/107	133/18986	0.0075188	1.33413	0.291111	0.529663	0.639407	0.599736	IL12A	1
GO:0007162	negative regulation of cell adhesion	2/107	314/18986	0.00636943	1.13019	0.175123	0.530646	0.640197	0.600476	BMP6/C1QTNF1	2
GO:0038061	non-canonical NF-kappaB signal transduction	1/107	134/18986	0.00746269	1.32417	0.283504	0.532332	0.641435	0.601638	TNFSF15	1
GO:0048706	embryonic skeletal system development	1/107	134/18986	0.00746269	1.32417	0.283504	0.532332	0.641435	0.601638	ZEB1	1
GO:0002244	hematopoietic progenitor cell differentiation	1/107	135/18986	0.00740741	1.31436	0.275957	0.534986	0.643041	0.603145	INHBA	1
GO:0006639	acylglycerol metabolic process	1/107	135/18986	0.00740741	1.31436	0.275957	0.534986	0.643041	0.603145	PCSK9	1
GO:0030833	regulation of actin filament polymerization	1/107	135/18986	0.00740741	1.31436	0.275957	0.534986	0.643041	0.603145	PRKCE	1
GO:0051028	mRNA transport	1/107	135/18986	0.00740741	1.31436	0.275957	0.534986	0.643041	0.603145	ARC	1
GO:0001666	response to hypoxia	2/107	317/18986	0.00630915	1.11949	0.161514	0.535782	0.643203	0.603296	PRKCE/INHBA	2
GO:0002218	activation of innate immune response	2/107	317/18986	0.00630915	1.11949	0.161514	0.535782	0.643203	0.603296	PRKCE/COLEC12	2
GO:0002708	positive regulation of lymphocyte mediated immunity	1/107	136/18986	0.00735294	1.3047	0.268469	0.537626	0.643432	0.603511	IL12A	1
GO:0006638	neutral lipid metabolic process	1/107	136/18986	0.00735294	1.3047	0.268469	0.537626	0.643432	0.603511	PCSK9	1
GO:0007041	lysosomal transport	1/107	136/18986	0.00735294	1.3047	0.268469	0.537626	0.643432	0.603511	PCSK9	1
GO:0042476	odontogenesis	1/107	136/18986	0.00735294	1.3047	0.268469	0.537626	0.643432	0.603511	INHBA	1
GO:1904950	negative regulation of establishment of protein localization	1/107	136/18986	0.00735294	1.3047	0.268469	0.537626	0.643432	0.603511	IL12A	1
GO:0007368	determination of left/right symmetry	1/107	137/18986	0.00729927	1.29518	0.26104	0.540251	0.645382	0.60534	FOXF1	1
GO:0010950	positive regulation of endopeptidase activity	1/107	137/18986	0.00729927	1.29518	0.26104	0.540251	0.645382	0.60534	TNFSF15	1
GO:0051592	response to calcium ion	1/107	137/18986	0.00729927	1.29518	0.26104	0.540251	0.645382	0.60534	CASQ2	1
GO:0007200	phospholipase C-activating G protein-coupled receptor signaling pathway	1/107	138/18986	0.00724638	1.28579	0.253667	0.54286	0.648102	0.607891	NMUR2	1
GO:0009101	glycoprotein biosynthetic process	2/107	322/18986	0.00621118	1.10211	0.13912	0.544257	0.648973	0.608708	HBEGF/CRPPA	2
GO:0044403	biological process involved in symbiotic interaction	2/107	322/18986	0.00621118	1.10211	0.13912	0.544257	0.648973	0.608708	CLEC4M/CR2	2
GO:0002821	positive regulation of adaptive immune response	1/107	139/18986	0.00719424	1.27654	0.246351	0.545456	0.649209	0.60893	IL12A	1
GO:0007266	Rho protein signal transduction	1/107	139/18986	0.00719424	1.27654	0.246351	0.545456	0.649209	0.60893	ARHGDIB	1
GO:0030218	erythrocyte differentiation	1/107	139/18986	0.00719424	1.27654	0.246351	0.545456	0.649209	0.60893	INHBA	1
GO:0008360	regulation of cell shape	1/107	140/18986	0.00714286	1.26742	0.23909	0.548036	0.650292	0.609945	FGR	1
GO:0010927	cellular component assembly involved in morphogenesis	1/107	140/18986	0.00714286	1.26742	0.23909	0.548036	0.650292	0.609945	LDB3	1
GO:0032989	cellular anatomical entity morphogenesis	1/107	140/18986	0.00714286	1.26742	0.23909	0.548036	0.650292	0.609945	LDB3	1
GO:0046328	regulation of JNK cascade	1/107	140/18986	0.00714286	1.26742	0.23909	0.548036	0.650292	0.609945	FGF19	1
GO:0061982	meiosis I cell cycle process	1/107	140/18986	0.00714286	1.26742	0.23909	0.548036	0.650292	0.609945	TEX15	1
GO:0048638	regulation of developmental growth	2/107	325/18986	0.00615385	1.09193	0.125851	0.549291	0.651383	0.610969	DUSP6/FOXS1	2
GO:0007249	canonical NF-kappaB signal transduction	2/107	327/18986	0.00611621	1.08526	0.117074	0.552625	0.654938	0.614304	PRKCE/TNFSF15	2
GO:0031109	microtubule polymerization or depolymerization	1/107	142/18986	0.00704225	1.24957	0.22473	0.553154	0.655166	0.614517	CDH5	1
GO:0000018	regulation of DNA recombination	1/107	143/18986	0.00699301	1.24083	0.21763	0.555691	0.657371	0.616585	TEX15	1
GO:0048813	dendrite morphogenesis	1/107	143/18986	0.00699301	1.24083	0.21763	0.555691	0.657371	0.616585	ARC	1
GO:0007586	digestion	1/107	144/18986	0.00694444	1.23222	0.210581	0.558214	0.659153	0.618257	IL10RA	1
GO:0043281	regulation of cysteine-type endopeptidase activity involved in apoptotic process	1/107	144/18986	0.00694444	1.23222	0.210581	0.558214	0.659153	0.618257	TNFSF15	1
GO:0060972	left/right pattern formation	1/107	144/18986	0.00694444	1.23222	0.210581	0.558214	0.659153	0.618257	FOXF1	1
GO:0036293	response to decreased oxygen levels	2/107	331/18986	0.0060423	1.07214	0.0996789	0.559243	0.659967	0.619021	PRKCE/INHBA	2
GO:2000779	regulation of double-strand break repair	1/107	145/18986	0.00689655	1.22372	0.203583	0.560723	0.661313	0.620283	TEX15	1
GO:0006470	protein dephosphorylation	1/107	146/18986	0.00684932	1.21534	0.196636	0.563218	0.66305	0.621912	DUSP6	1
GO:0009582	detection of abiotic stimulus	1/107	146/18986	0.00684932	1.21534	0.196636	0.563218	0.66305	0.621912	PRDM12	1
GO:0043467	regulation of generation of precursor metabolites and energy	1/107	146/18986	0.00684932	1.21534	0.196636	0.563218	0.66305	0.621912	IRS2	1
GO:0009799	specification of symmetry	1/107	147/18986	0.00680272	1.20707	0.189738	0.565698	0.663962	0.622767	FOXF1	1
GO:0009855	determination of bilateral symmetry	1/107	147/18986	0.00680272	1.20707	0.189738	0.565698	0.663962	0.622767	FOXF1	1
GO:0010952	positive regulation of peptidase activity	1/107	147/18986	0.00680272	1.20707	0.189738	0.565698	0.663962	0.622767	TNFSF15	1
GO:0060048	cardiac muscle contraction	1/107	147/18986	0.00680272	1.20707	0.189738	0.565698	0.663962	0.622767	CASQ2	1
GO:0071675	regulation of mononuclear cell migration	1/107	147/18986	0.00680272	1.20707	0.189738	0.565698	0.663962	0.622767	IL12A	1
GO:0051251	positive regulation of lymphocyte activation	2/107	336/18986	0.00595238	1.05619	0.0782287	0.567418	0.665252	0.623978	IRS2/IL12A	2
GO:0008203	cholesterol metabolic process	1/107	148/18986	0.00675676	1.19891	0.182888	0.568165	0.665252	0.623978	PCSK9	1
GO:0046165	alcohol biosynthetic process	1/107	148/18986	0.00675676	1.19891	0.182888	0.568165	0.665252	0.623978	BMP6	1
GO:0046488	phosphatidylinositol metabolic process	1/107	148/18986	0.00675676	1.19891	0.182888	0.568165	0.665252	0.623978	HYCC1	1
GO:1902105	regulation of leukocyte differentiation	2/107	337/18986	0.00593472	1.05305	0.0739769	0.56904	0.665876	0.624562	ZEB1/INHBA	2
GO:0006790	sulfur compound metabolic process	2/107	338/18986	0.00591716	1.04994	0.0697376	0.570657	0.667367	0.625961	CHAC2/ACSM5	2
GO:0030198	extracellular matrix organization	2/107	339/18986	0.00589971	1.04684	0.0655108	0.572271	0.667795	0.626363	FOXF1/EGFLAM	2
GO:0048872	homeostasis of number of cells	2/107	339/18986	0.00589971	1.04684	0.0655108	0.572271	0.667795	0.626363	INHBA/LMO1	2
GO:0034101	erythrocyte homeostasis	1/107	150/18986	0.00666667	1.18293	0.169332	0.573057	0.667795	0.626363	INHBA	1
GO:0006913	nucleocytoplasmic transport	2/107	340/18986	0.00588235	1.04376	0.0612964	0.57388	0.667795	0.626363	EGR2/CITED1	2
GO:0043062	extracellular structure organization	2/107	340/18986	0.00588235	1.04376	0.0612964	0.57388	0.667795	0.626363	FOXF1/EGFLAM	2
GO:0051169	nuclear transport	2/107	340/18986	0.00588235	1.04376	0.0612964	0.57388	0.667795	0.626363	EGR2/CITED1	2
GO:0001909	leukocyte mediated cytotoxicity	1/107	151/18986	0.00662252	1.17509	0.162624	0.575482	0.667795	0.626363	IL12A	1
GO:0008584	male gonad development	1/107	151/18986	0.00662252	1.17509	0.162624	0.575482	0.667795	0.626363	INHBA	1
GO:0021915	neural tube development	1/107	151/18986	0.00662252	1.17509	0.162624	0.575482	0.667795	0.626363	DZIP1L	1
GO:0030534	adult behavior	1/107	151/18986	0.00662252	1.17509	0.162624	0.575482	0.667795	0.626363	TRH	1
GO:0060078	regulation of postsynaptic membrane potential	1/107	151/18986	0.00662252	1.17509	0.162624	0.575482	0.667795	0.626363	INSYN2A	1
GO:0120161	regulation of cold-induced thermogenesis	1/107	151/18986	0.00662252	1.17509	0.162624	0.575482	0.667795	0.626363	FABP5	1
GO:0045229	external encapsulating structure organization	2/107	341/18986	0.0058651	1.0407	0.0570942	0.575484	0.667795	0.626363	FOXF1/EGFLAM	2
GO:0001890	placenta development	1/107	152/18986	0.00657895	1.16736	0.155962	0.577894	0.668995	0.627489	CITED1	1
GO:0031333	negative regulation of protein-containing complex assembly	1/107	152/18986	0.00657895	1.16736	0.155962	0.577894	0.668995	0.627489	CDH5	1
GO:0032006	regulation of TOR signaling	1/107	152/18986	0.00657895	1.16736	0.155962	0.577894	0.668995	0.627489	STAMBPL1	1
GO:0046546	development of primary male sexual characteristics	1/107	152/18986	0.00657895	1.16736	0.155962	0.577894	0.668995	0.627489	INHBA	1
GO:0008064	regulation of actin polymerization or depolymerization	1/107	153/18986	0.00653595	1.15973	0.149345	0.580292	0.670177	0.628597	PRKCE	1
GO:0106106	cold-induced thermogenesis	1/107	153/18986	0.00653595	1.15973	0.149345	0.580292	0.670177	0.628597	FABP5	1
GO:1904375	regulation of protein localization to cell periphery	1/107	153/18986	0.00653595	1.15973	0.149345	0.580292	0.670177	0.628597	PRKCE	1
GO:2000377	regulation of reactive oxygen species metabolic process	1/107	153/18986	0.00653595	1.15973	0.149345	0.580292	0.670177	0.628597	PRKCE	1
GO:0010038	response to metal ion	2/107	345/18986	0.0057971	1.02863	0.0404068	0.58186	0.671191	0.629548	BMP6/CASQ2	2
GO:0051235	maintenance of location	2/107	345/18986	0.0057971	1.02863	0.0404068	0.58186	0.671191	0.629548	PRKCE/CASQ2	2
GO:0035296	regulation of tube diameter	1/107	154/18986	0.00649351	1.1522	0.142772	0.582676	0.671337	0.629685	NPR1	1
GO:0097746	blood vessel diameter maintenance	1/107	154/18986	0.00649351	1.1522	0.142772	0.582676	0.671337	0.629685	NPR1	1
GO:0052547	regulation of peptidase activity	2/107	346/18986	0.00578035	1.02566	0.0362649	0.583443	0.671822	0.63014	TNFSF15/SERPINC1	2
GO:0035150	regulation of tube size	1/107	155/18986	0.00645161	1.14477	0.136243	0.585048	0.673272	0.6315	NPR1	1
GO:0070588	calcium ion transmembrane transport	2/107	348/18986	0.00574713	1.01977	0.0280164	0.586595	0.67439	0.632548	PRKCE/CASQ2	2
GO:0009152	purine ribonucleotide biosynthetic process	1/107	156/18986	0.00641026	1.13743	0.129757	0.587405	0.67439	0.632548	NPR1	1
GO:0030832	regulation of actin filament length	1/107	156/18986	0.00641026	1.13743	0.129757	0.587405	0.67439	0.632548	PRKCE	1
GO:1905039	carboxylic acid transmembrane transport	1/107	156/18986	0.00641026	1.13743	0.129757	0.587405	0.67439	0.632548	IRS2	1
GO:0030111	regulation of Wnt signaling pathway	2/107	349/18986	0.00573066	1.01684	0.0239097	0.588165	0.674864	0.632993	CITED1/KLF15	2
GO:0021700	developmental maturation	2/107	350/18986	0.00571429	1.01394	0.0198145	0.589731	0.67509	0.633205	LHX6/CDH5	2
GO:0007030	Golgi organization	1/107	157/18986	0.00636943	1.13019	0.123313	0.58975	0.67509	0.633205	ZFP69B	1
GO:0009411	response to UV	1/107	157/18986	0.00636943	1.13019	0.123313	0.58975	0.67509	0.633205	IL12A	1
GO:0034767	positive regulation of monoatomic ion transmembrane transport	1/107	157/18986	0.00636943	1.13019	0.123313	0.58975	0.67509	0.633205	ARC	1
GO:0002705	positive regulation of leukocyte mediated immunity	1/107	158/18986	0.00632911	1.12303	0.116911	0.592081	0.676434	0.634465	IL12A	1
GO:0035264	multicellular organism growth	1/107	158/18986	0.00632911	1.12303	0.116911	0.592081	0.676434	0.634465	FOXS1	1
GO:0043433	negative regulation of DNA-binding transcription factor activity	1/107	158/18986	0.00632911	1.12303	0.116911	0.592081	0.676434	0.634465	FOXS1	1
GO:0007043	cell-cell junction assembly	1/107	159/18986	0.00628931	1.11597	0.110551	0.5944	0.676434	0.634465	CDH5	1
GO:0007612	learning	1/107	159/18986	0.00628931	1.11597	0.110551	0.5944	0.676434	0.634465	ARC	1
GO:0016125	sterol metabolic process	1/107	159/18986	0.00628931	1.11597	0.110551	0.5944	0.676434	0.634465	PCSK9	1
GO:0018105	peptidyl-serine phosphorylation	1/107	159/18986	0.00628931	1.11597	0.110551	0.5944	0.676434	0.634465	PRKCE	1
GO:0045807	positive regulation of endocytosis	1/107	159/18986	0.00628931	1.11597	0.110551	0.5944	0.676434	0.634465	PCSK9	1
GO:1902652	secondary alcohol metabolic process	1/107	159/18986	0.00628931	1.11597	0.110551	0.5944	0.676434	0.634465	PCSK9	1
GO:1903825	organic acid transmembrane transport	1/107	159/18986	0.00628931	1.11597	0.110551	0.5944	0.676434	0.634465	IRS2	1
GO:0031507	heterochromatin formation	1/107	161/18986	0.00621118	1.10211	0.0979511	0.598997	0.681267	0.638999	TEX15	1
GO:0070482	response to oxygen levels	2/107	358/18986	0.00558659	0.991281	-0.0125385	0.602098	0.684394	0.641931	PRKCE/INHBA	2
GO:0006887	exocytosis	2/107	360/18986	0.00555556	0.985774	-0.020516	0.605146	0.686993	0.644369	FGR/FOXF1	2
GO:0050657	nucleic acid transport	1/107	164/18986	0.00609756	1.08195	0.0793465	0.605796	0.686993	0.644369	ARC	1
GO:0050658	RNA transport	1/107	164/18986	0.00609756	1.08195	0.0793465	0.605796	0.686993	0.644369	ARC	1
GO:0051017	actin filament bundle assembly	1/107	164/18986	0.00609756	1.08195	0.0793465	0.605796	0.686993	0.644369	CALD1	1
GO:1990778	protein localization to cell periphery	2/107	362/18986	0.00552486	0.980327	-0.0284504	0.608176	0.68929	0.646524	PRKCE/HYCC1	2
GO:0006066	alcohol metabolic process	2/107	363/18986	0.00550964	0.977627	-0.0324015	0.609685	0.68965	0.646861	BMP6/PCSK9	2
GO:0031346	positive regulation of cell projection organization	2/107	363/18986	0.00550964	0.977627	-0.0324015	0.609685	0.68965	0.646861	TENM2/CLRN1	2
GO:0030307	positive regulation of cell growth	1/107	166/18986	0.0060241	1.06891	0.0671338	0.610266	0.68965	0.646861	HBEGF	1
GO:0033673	negative regulation of kinase activity	1/107	166/18986	0.0060241	1.06891	0.0671338	0.610266	0.68965	0.646861	IRS2	1
GO:0070507	regulation of microtubule cytoskeleton organization	1/107	166/18986	0.0060241	1.06891	0.0671338	0.610266	0.68965	0.646861	CDH5	1
GO:0030041	actin filament polymerization	1/107	167/18986	0.00598802	1.06251	0.061083	0.612481	0.69015	0.64733	PRKCE	1
GO:0035051	cardiocyte differentiation	1/107	167/18986	0.00598802	1.06251	0.061083	0.612481	0.69015	0.64733	INHBA	1
GO:0051236	establishment of RNA localization	1/107	167/18986	0.00598802	1.06251	0.061083	0.612481	0.69015	0.64733	ARC	1
GO:0098754	detoxification	1/107	167/18986	0.00598802	1.06251	0.061083	0.612481	0.69015	0.64733	PRKCE	1
GO:2000116	regulation of cysteine-type endopeptidase activity	1/107	167/18986	0.00598802	1.06251	0.061083	0.612481	0.69015	0.64733	TNFSF15	1
GO:0007584	response to nutrient	1/107	168/18986	0.00595238	1.05619	0.0550686	0.614685	0.691432	0.648533	SLC6A19	1
GO:0051494	negative regulation of cytoskeleton organization	1/107	168/18986	0.00595238	1.05619	0.0550686	0.614685	0.691432	0.648533	CDH5	1
GO:0061572	actin filament bundle organization	1/107	168/18986	0.00595238	1.05619	0.0550686	0.614685	0.691432	0.648533	CALD1	1
GO:0007517	muscle organ development	2/107	369/18986	0.00542005	0.96173	-0.0558882	0.618646	0.695141	0.652012	HBEGF/EGR2	2
GO:0043524	negative regulation of neuron apoptotic process	1/107	170/18986	0.00588235	1.04376	0.0431468	0.619054	0.695141	0.652012	CITED1	1
GO:1990845	adaptive thermogenesis	1/107	170/18986	0.00588235	1.04376	0.0431468	0.619054	0.695141	0.652012	FABP5	1
GO:0009260	ribonucleotide biosynthetic process	1/107	171/18986	0.00584795	1.03766	0.0372386	0.621221	0.696368	0.653163	NPR1	1
GO:0018209	peptidyl-serine modification	1/107	171/18986	0.00584795	1.03766	0.0372386	0.621221	0.696368	0.653163	PRKCE	1
GO:0048639	positive regulation of developmental growth	1/107	171/18986	0.00584795	1.03766	0.0372386	0.621221	0.696368	0.653163	FOXS1	1
GO:0002696	positive regulation of leukocyte activation	2/107	371/18986	0.00539084	0.956546	-0.0636348	0.621598	0.696391	0.653184	IRS2/IL12A	2
GO:0003205	cardiac chamber development	1/107	172/18986	0.00581395	1.03162	0.0313648	0.623375	0.697577	0.654297	FOXF1	1
GO:0043409	negative regulation of MAPK cascade	1/107	172/18986	0.00581395	1.03162	0.0313648	0.623375	0.697577	0.654297	DUSP6	1
GO:0007009	plasma membrane organization	1/107	173/18986	0.00578035	1.02566	0.025525	0.625517	0.698368	0.655039	COLEC12	1
GO:0007034	vacuolar transport	1/107	173/18986	0.00578035	1.02566	0.025525	0.625517	0.698368	0.655039	PCSK9	1
GO:0051168	nuclear export	1/107	173/18986	0.00578035	1.02566	0.025525	0.625517	0.698368	0.655039	EGR2	1
GO:1902904	negative regulation of supramolecular fiber organization	1/107	173/18986	0.00578035	1.02566	0.025525	0.625517	0.698368	0.655039	CDH5	1
GO:0060041	retina development in camera-type eye	1/107	174/18986	0.00574713	1.01977	0.0197188	0.627647	0.699943	0.656516	CALB1	1
GO:0170039	proteinogenic amino acid metabolic process	1/107	174/18986	0.00574713	1.01977	0.0197188	0.627647	0.699943	0.656516	UROC1	1
GO:0043604	amide biosynthetic process	1/107	175/18986	0.00571429	1.01394	0.0139457	0.629764	0.701902	0.658354	CHAC2	1
GO:0009266	response to temperature stimulus	1/107	176/18986	0.00568182	1.00818	0.00820529	0.63187	0.703846	0.660177	PRDM12	1
GO:0055002	striated muscle cell development	1/107	177/18986	0.00564972	1.00248	0.00249719	0.633964	0.705372	0.661608	LDB3	1
GO:1902905	positive regulation of supramolecular fiber organization	1/107	177/18986	0.00564972	1.00248	0.00249719	0.633964	0.705372	0.661608	PRKCE	1
GO:0002753	cytoplasmic pattern recognition receptor signaling pathway	1/107	178/18986	0.00561798	0.99685	-0.00317902	0.636047	0.705671	0.661889	COLEC12	1
GO:0007519	skeletal muscle tissue development	1/107	178/18986	0.00561798	0.99685	-0.00317902	0.636047	0.705671	0.661889	EGR2	1
GO:0030216	keratinocyte differentiation	1/107	178/18986	0.00561798	0.99685	-0.00317902	0.636047	0.705671	0.661889	SPRR3	1
GO:0031929	TOR signaling	1/107	178/18986	0.00561798	0.99685	-0.00317902	0.636047	0.705671	0.661889	STAMBPL1	1
GO:0046390	ribose phosphate biosynthetic process	1/107	178/18986	0.00561798	0.99685	-0.00317902	0.636047	0.705671	0.661889	NPR1	1
GO:0030336	negative regulation of cell migration	2/107	383/18986	0.00522193	0.926576	-0.109284	0.638946	0.708484	0.664527	ARHGDIB/IL24	2
GO:0046777	protein autophosphorylation	1/107	180/18986	0.00555556	0.985774	-0.0144374	0.640176	0.708844	0.664865	FGR	1
GO:0141193	nuclear receptor-mediated signaling pathway	1/107	180/18986	0.00555556	0.985774	-0.0144374	0.640176	0.708844	0.664865	FABP5	1
GO:0030522	intracellular receptor signaling pathway	2/107	384/18986	0.00520833	0.924163	-0.113025	0.640364	0.708844	0.664865	FABP5/COLEC12	2
GO:0030178	negative regulation of Wnt signaling pathway	1/107	181/18986	0.00552486	0.980327	-0.0200204	0.642223	0.709692	0.66566	CITED1	1
GO:0035265	organ growth	1/107	181/18986	0.00552486	0.980327	-0.0200204	0.642223	0.709692	0.66566	DUSP6	1
GO:0170033	L-amino acid metabolic process	1/107	181/18986	0.00552486	0.980327	-0.0200204	0.642223	0.709692	0.66566	UROC1	1
GO:0042129	regulation of T cell proliferation	1/107	182/18986	0.00549451	0.974941	-0.0255731	0.644259	0.71073	0.666634	LMO1	1
GO:0043534	blood vessel endothelial cell migration	1/107	182/18986	0.00549451	0.974941	-0.0255731	0.644259	0.71073	0.666634	CDH5	1
GO:0044272	sulfur compound biosynthetic process	1/107	182/18986	0.00549451	0.974941	-0.0255731	0.644259	0.71073	0.666634	CHAC2	1
GO:0001818	negative regulation of cytokine production	2/107	388/18986	0.00515464	0.914635	-0.127899	0.645991	0.71135	0.667216	INHBA/IL12A	2
GO:0002262	myeloid cell homeostasis	1/107	183/18986	0.00546448	0.969613	-0.0310958	0.646283	0.71135	0.667216	INHBA	1
GO:0006575	cellular modified amino acid metabolic process	1/107	183/18986	0.00546448	0.969613	-0.0310958	0.646283	0.71135	0.667216	CHAC2	1
GO:0071248	cellular response to metal ion	1/107	183/18986	0.00546448	0.969613	-0.0310958	0.646283	0.71135	0.667216	BMP6	1
GO:0007189	adenylate cyclase-activating G protein-coupled receptor signaling pathway	1/107	184/18986	0.00543478	0.964344	-0.036589	0.648296	0.713163	0.668915	CALCR	1
GO:0050867	positive regulation of cell activation	2/107	391/18986	0.00511509	0.907618	-0.138959	0.650165	0.714556	0.670223	IRS2/IL12A	2
GO:0001659	temperature homeostasis	1/107	185/18986	0.00540541	0.959131	-0.0420529	0.650298	0.714556	0.670223	FABP5	1
GO:0009100	glycoprotein metabolic process	2/107	392/18986	0.00510204	0.905302	-0.142628	0.651549	0.715527	0.671133	HBEGF/CRPPA	2
GO:0051495	positive regulation of cytoskeleton organization	1/107	186/18986	0.00537634	0.953974	-0.047488	0.652288	0.715935	0.671516	PRKCE	1
GO:0000724	double-strand break repair via homologous recombination	1/107	188/18986	0.00531915	0.943826	-0.058273	0.656235	0.719861	0.675198	TEX15	1
GO:0001764	neuron migration	1/107	189/18986	0.00529101	0.938832	-0.0636236	0.658192	0.721601	0.67683	LHX6	1
GO:2000146	negative regulation of cell motility	2/107	398/18986	0.00502513	0.891655	-0.164454	0.659757	0.722106	0.677304	ARHGDIB/IL24	2
GO:0008217	regulation of blood pressure	1/107	190/18986	0.00526316	0.933891	-0.0689467	0.660137	0.722106	0.677304	NPR1	1
GO:0009267	cellular response to starvation	1/107	190/18986	0.00526316	0.933891	-0.0689467	0.660137	0.722106	0.677304	PCSK9	1
GO:0051348	negative regulation of transferase activity	1/107	190/18986	0.00526316	0.933891	-0.0689467	0.660137	0.722106	0.677304	IRS2	1
GO:0030258	lipid modification	1/107	191/18986	0.0052356	0.929001	-0.0742427	0.662072	0.72221	0.677401	IRS2	1
GO:0045580	regulation of T cell differentiation	1/107	191/18986	0.0052356	0.929001	-0.0742427	0.662072	0.72221	0.677401	ZEB1	1
GO:0048771	tissue remodeling	1/107	191/18986	0.0052356	0.929001	-0.0742427	0.662072	0.72221	0.677401	THBS4	1
GO:2000045	regulation of G1/S transition of mitotic cell cycle	1/107	191/18986	0.0052356	0.929001	-0.0742427	0.662072	0.72221	0.677401	INHBA	1
GO:0002460	adaptive immune response based on somatic recombination of immune receptors built from immunoglobulin superfamily domains	2/107	400/18986	0.005	0.887196	-0.17166	0.662458	0.72221	0.677401	IL12A/CR2	2
GO:1902903	regulation of supramolecular fiber organization	2/107	400/18986	0.005	0.887196	-0.17166	0.662458	0.72221	0.677401	PRKCE/CDH5	2
GO:0000910	cytokinesis	1/107	192/18986	0.00520833	0.924163	-0.0795117	0.663996	0.722671	0.677834	PRKCE	1
GO:0045814	negative regulation of gene expression, epigenetic	1/107	192/18986	0.00520833	0.924163	-0.0795117	0.663996	0.722671	0.677834	TEX15	1
GO:0060538	skeletal muscle organ development	1/107	192/18986	0.00520833	0.924163	-0.0795117	0.663996	0.722671	0.677834	EGR2	1
GO:0001701	in utero embryonic development	2/107	403/18986	0.00496278	0.880592	-0.182405	0.666479	0.724564	0.679609	CITED1/FOXF1	2
GO:2001233	regulation of apoptotic signaling pathway	2/107	403/18986	0.00496278	0.880592	-0.182405	0.666479	0.724564	0.679609	INHBA/TNFSF15	2
GO:0000725	recombinational repair	1/107	194/18986	0.00515464	0.914635	-0.0899705	0.667811	0.724797	0.679828	TEX15	1
GO:0006941	striated muscle contraction	1/107	194/18986	0.00515464	0.914635	-0.0899705	0.667811	0.724797	0.679828	CASQ2	1
GO:1905475	regulation of protein localization to membrane	1/107	194/18986	0.00515464	0.914635	-0.0899705	0.667811	0.724797	0.679828	PRKCE	1
GO:0021543	pallium development	1/107	195/18986	0.00512821	0.909945	-0.0951609	0.669703	0.726444	0.681373	LHX6	1
GO:0002700	regulation of production of molecular mediator of immune response	1/107	196/18986	0.00510204	0.905302	-0.100326	0.671583	0.727268	0.682146	CALHM6	1
GO:0008154	actin polymerization or depolymerization	1/107	196/18986	0.00510204	0.905302	-0.100326	0.671583	0.727268	0.682146	PRKCE	1
GO:0046631	alpha-beta T cell activation	1/107	196/18986	0.00510204	0.905302	-0.100326	0.671583	0.727268	0.682146	IL12A	1
GO:0006164	purine nucleotide biosynthetic process	1/107	197/18986	0.00507614	0.900707	-0.105465	0.673453	0.728888	0.683665	NPR1	1
GO:0010466	negative regulation of peptidase activity	1/107	198/18986	0.00505051	0.896158	-0.110579	0.675313	0.729683	0.684411	SERPINC1	1
GO:0030324	lung development	1/107	198/18986	0.00505051	0.896158	-0.110579	0.675313	0.729683	0.684411	FOXF1	1
GO:0071466	cellular response to xenobiotic stimulus	1/107	198/18986	0.00505051	0.896158	-0.110579	0.675313	0.729683	0.684411	SLCO2B1	1
GO:0000302	response to reactive oxygen species	1/107	200/18986	0.005	0.887196	-0.120734	0.679001	0.732854	0.687385	AREG	1
GO:0140013	meiotic nuclear division	1/107	200/18986	0.005	0.887196	-0.120734	0.679001	0.732854	0.687385	TEX15	1
GO:0002520	immune system development	1/107	202/18986	0.0049505	0.878412	-0.130792	0.682647	0.735973	0.690311	RCBTB2	1
GO:0030323	respiratory tube development	1/107	202/18986	0.0049505	0.878412	-0.130792	0.682647	0.735973	0.690311	FOXF1	1
GO:0040013	negative regulation of locomotion	2/107	416/18986	0.00480769	0.853073	-0.228112	0.683463	0.736445	0.690753	ARHGDIB/IL24	2
GO:0006403	RNA localization	1/107	204/18986	0.00490196	0.8698	-0.140754	0.686253	0.738921	0.693076	ARC	1
GO:0045786	negative regulation of cell cycle	2/107	419/18986	0.00477327	0.846965	-0.23847	0.687282	0.738921	0.693076	INHBA/HPGD	2
GO:0031396	regulation of protein ubiquitination	1/107	205/18986	0.00487805	0.865557	-0.145701	0.68804	0.738921	0.693076	PRKCE	1
GO:0055001	muscle cell development	1/107	205/18986	0.00487805	0.865557	-0.145701	0.68804	0.738921	0.693076	LDB3	1
GO:0090101	negative regulation of transmembrane receptor protein serine/threonine kinase signaling pathway	1/107	205/18986	0.00487805	0.865557	-0.145701	0.68804	0.738921	0.693076	BMPER	1
GO:1901991	negative regulation of mitotic cell cycle phase transition	1/107	205/18986	0.00487805	0.865557	-0.145701	0.68804	0.738921	0.693076	INHBA	1
GO:0098739	import across plasma membrane	1/107	206/18986	0.00485437	0.861356	-0.150625	0.689817	0.740422	0.694483	IRS2	1
GO:0016051	carbohydrate biosynthetic process	1/107	207/18986	0.00483092	0.857194	-0.155526	0.691585	0.741909	0.695879	IRS2	1
GO:0051260	protein homooligomerization	1/107	208/18986	0.00480769	0.853073	-0.160404	0.693342	0.743385	0.697262	ARC	1
GO:0009615	response to virus	2/107	425/18986	0.00470588	0.835008	-0.258979	0.694808	0.744028	0.697866	FGR/IL12A	2
GO:0016064	immunoglobulin mediated immune response	1/107	209/18986	0.00478469	0.848992	-0.16526	0.695089	0.744028	0.697866	CR2	1
GO:1901605	alpha-amino acid metabolic process	1/107	209/18986	0.00478469	0.848992	-0.16526	0.695089	0.744028	0.697866	UROC1	1
GO:0048469	cell maturation	1/107	210/18986	0.0047619	0.844949	-0.170095	0.696827	0.745478	0.699226	LHX6	1
GO:0045859	regulation of protein kinase activity	2/107	427/18986	0.00468384	0.831097	-0.265755	0.697283	0.745556	0.699299	FGR/TNFSF15	2
GO:0019724	B cell mediated immunity	1/107	212/18986	0.00471698	0.836978	-0.179699	0.700272	0.748342	0.701912	CR2	1
GO:0007159	leukocyte cell-cell adhesion	2/107	430/18986	0.00465116	0.825299	-0.275864	0.700965	0.748671	0.702221	IL12A/CLEC4M	2
GO:0045732	positive regulation of protein catabolic process	1/107	213/18986	0.00469484	0.833048	-0.184468	0.701981	0.748933	0.702467	PCSK9	1
GO:0071383	cellular response to steroid hormone stimulus	1/107	213/18986	0.00469484	0.833048	-0.184468	0.701981	0.748933	0.702467	SSTR2	1
GO:0031503	protein-containing complex localization	1/107	214/18986	0.0046729	0.829155	-0.189217	0.703679	0.750334	0.703781	ARC	1
GO:1903706	regulation of hemopoiesis	2/107	433/18986	0.00461894	0.819581	-0.285909	0.704611	0.750901	0.704312	ZEB1/INHBA	2
GO:0042098	T cell proliferation	1/107	215/18986	0.00465116	0.825299	-0.193945	0.705368	0.750901	0.704312	LMO1	1
GO:0043270	positive regulation of monoatomic ion transport	1/107	215/18986	0.00465116	0.825299	-0.193945	0.705368	0.750901	0.704312	ARC	1
GO:0031032	actomyosin structure organization	1/107	216/18986	0.00462963	0.821478	-0.198653	0.707048	0.752277	0.705603	LDB3	1
GO:0045637	regulation of myeloid cell differentiation	1/107	219/18986	0.00456621	0.810225	-0.212653	0.71203	0.75675	0.709799	INHBA	1
GO:0051098	regulation of binding	1/107	219/18986	0.00456621	0.810225	-0.212653	0.71203	0.75675	0.709799	PCSK9	1
GO:1902806	regulation of cell cycle G1/S phase transition	1/107	220/18986	0.00454545	0.806542	-0.21728	0.713671	0.758081	0.711047	INHBA	1
GO:0016311	dephosphorylation	1/107	222/18986	0.0045045	0.799276	-0.226475	0.716927	0.760295	0.713123	DUSP6	1
GO:0099504	synaptic vesicle cycle	1/107	222/18986	0.0045045	0.799276	-0.226475	0.716927	0.760295	0.713123	SYNDIG1	1
GO:1903046	meiotic cell cycle process	1/107	222/18986	0.0045045	0.799276	-0.226475	0.716927	0.760295	0.713123	TEX15	1
GO:0006486	protein glycosylation	1/107	223/18986	0.0044843	0.795692	-0.231044	0.718542	0.760654	0.71346	CRPPA	1
GO:0043413	macromolecule glycosylation	1/107	223/18986	0.0044843	0.795692	-0.231044	0.718542	0.760654	0.71346	CRPPA	1
GO:1903828	negative regulation of protein localization	1/107	223/18986	0.0044843	0.795692	-0.231044	0.718542	0.760654	0.71346	IL12A	1
GO:0006816	calcium ion transport	2/107	445/18986	0.00449438	0.79748	-0.325454	0.718829	0.760654	0.71346	PRKCE/CASQ2	2
GO:0006364	rRNA processing	1/107	225/18986	0.00444444	0.788619	-0.240125	0.721743	0.762493	0.715185	ESF1	1
GO:0051648	vesicle localization	1/107	225/18986	0.00444444	0.788619	-0.240125	0.721743	0.762493	0.715185	SYNDIG1	1
GO:0060541	respiratory system development	1/107	225/18986	0.00444444	0.788619	-0.240125	0.721743	0.762493	0.715185	FOXF1	1
GO:0006282	regulation of DNA repair	1/107	227/18986	0.00440529	0.781671	-0.249131	0.724908	0.765421	0.717931	TEX15	1
GO:0009410	response to xenobiotic stimulus	2/107	451/18986	0.00443459	0.78687	-0.344861	0.725723	0.765451	0.717959	DUSP6/SLCO2B1	2
GO:0030099	myeloid cell differentiation	2/107	451/18986	0.00443459	0.78687	-0.344861	0.725723	0.765451	0.717959	INHBA/CALCR	2
GO:0002440	production of molecular mediator of immune response	1/107	230/18986	0.00434783	0.771475	-0.262504	0.729588	0.769111	0.721393	CALHM6	1
GO:0006457	protein folding	1/107	231/18986	0.004329	0.768135	-0.266925	0.731131	0.77032	0.722527	ERP27	1
GO:0009165	nucleotide biosynthetic process	1/107	233/18986	0.00429185	0.761542	-0.275716	0.73419	0.773125	0.725157	NPR1	1
GO:0006417	regulation of translation	2/107	461/18986	0.00433839	0.769802	-0.376688	0.736898	0.775471	0.727358	PUM3/FAM86B2	2
GO:0010594	regulation of endothelial cell migration	1/107	235/18986	0.00425532	0.755061	-0.284438	0.737215	0.775471	0.727358	BMPER	1
GO:0001933	negative regulation of protein phosphorylation	1/107	236/18986	0.00423729	0.751861	-0.288774	0.738715	0.776209	0.72805	INSM1	1
GO:0008406	gonad development	1/107	236/18986	0.00423729	0.751861	-0.288774	0.738715	0.776209	0.72805	INHBA	1
GO:0044242	cellular lipid catabolic process	1/107	238/18986	0.00420168	0.745543	-0.297395	0.741688	0.778913	0.730586	IRS2	1
GO:0045137	development of primary sexual characteristics	1/107	241/18986	0.00414938	0.736262	-0.310203	0.746086	0.783109	0.734522	INHBA	1
GO:0070085	glycosylation	1/107	242/18986	0.00413223	0.73322	-0.31444	0.747535	0.783784	0.735156	CRPPA	1
GO:0072593	reactive oxygen species metabolic process	1/107	242/18986	0.00413223	0.73322	-0.31444	0.747535	0.783784	0.735156	PRKCE	1
GO:0045860	positive regulation of protein kinase activity	1/107	243/18986	0.00411523	0.730203	-0.318661	0.748977	0.784873	0.736176	TNFSF15	1
GO:0016055	Wnt signaling pathway	2/107	476/18986	0.00420168	0.745543	-0.423275	0.75294	0.788503	0.739582	CITED1/KLF15	2
GO:0016485	protein processing	1/107	246/18986	0.00406504	0.721298	-0.331231	0.753252	0.788503	0.739582	PCSK9	1
GO:0052548	regulation of endopeptidase activity	1/107	248/18986	0.00403226	0.715481	-0.339534	0.756061	0.790594	0.741543	TNFSF15	1
GO:1903320	regulation of protein modification by small protein conjugation or removal	1/107	248/18986	0.00403226	0.715481	-0.339534	0.756061	0.790594	0.741543	PRKCE	1
GO:0045444	fat cell differentiation	1/107	251/18986	0.00398406	0.706929	-0.351876	0.760217	0.794086	0.744818	EGR2	1
GO:0048863	stem cell differentiation	1/107	251/18986	0.00398406	0.706929	-0.351876	0.760217	0.794086	0.744818	SHC4	1
GO:0051346	negative regulation of hydrolase activity	1/107	252/18986	0.00396825	0.704124	-0.355961	0.761586	0.795089	0.745759	SERPINC1	1
GO:1901873	regulation of post-translational protein modification	1/107	253/18986	0.00395257	0.701341	-0.360031	0.762948	0.795885	0.746505	PRKCE	1
GO:0043086	negative regulation of catalytic activity	2/107	486/18986	0.00411523	0.730203	-0.453605	0.763166	0.795885	0.746505	IRS2/SERPINC1	2
GO:0051656	establishment of organelle localization	2/107	488/18986	0.00409836	0.72721	-0.459604	0.765167	0.797544	0.748062	FGR/FOXF1	2
GO:0000082	G1/S transition of mitotic cell cycle	1/107	256/18986	0.00390625	0.693122	-0.372155	0.766987	0.798586	0.749038	INHBA	1
GO:0045930	negative regulation of mitotic cell cycle	1/107	256/18986	0.00390625	0.693122	-0.372155	0.766987	0.798586	0.749038	INHBA	1
GO:0033674	positive regulation of kinase activity	1/107	258/18986	0.00387597	0.687749	-0.380168	0.769642	0.800493	0.750828	TNFSF15	1
GO:1901136	carbohydrate derivative catabolic process	1/107	258/18986	0.00387597	0.687749	-0.380168	0.769642	0.800493	0.750828	NPL	1
GO:0050870	positive regulation of T cell activation	1/107	260/18986	0.00384615	0.682459	-0.388125	0.772266	0.802794	0.752986	IL12A	1
GO:0072522	purine-containing compound biosynthetic process	1/107	263/18986	0.00380228	0.674674	-0.39996	0.776148	0.806398	0.756367	NPR1	1
GO:0001906	cell killing	1/107	264/18986	0.00378788	0.672118	-0.403878	0.777427	0.807297	0.757209	IL12A	1
GO:0016072	rRNA metabolic process	1/107	268/18986	0.00373134	0.662087	-0.419421	0.782473	0.812102	0.761716	ESF1	1
GO:0032886	regulation of microtubule-based process	1/107	269/18986	0.00371747	0.659625	-0.423275	0.783716	0.812959	0.76252	CDH5	1
GO:0009636	response to toxic substance	1/107	270/18986	0.0037037	0.657182	-0.427116	0.784952	0.813808	0.763316	PRKCE	1
GO:0032386	regulation of intracellular transport	1/107	272/18986	0.00367647	0.65235	-0.434761	0.787404	0.815915	0.765293	PCSK9	1
GO:0043488	regulation of mRNA stability	1/107	273/18986	0.003663	0.649961	-0.438565	0.78862	0.816306	0.765659	CALCR	1
GO:0110053	regulation of actin filament organization	1/107	273/18986	0.003663	0.649961	-0.438565	0.78862	0.816306	0.765659	PRKCE	1
GO:0003007	heart morphogenesis	1/107	274/18986	0.00364964	0.647589	-0.442357	0.789829	0.816688	0.766018	FOXF1	1
GO:0090068	positive regulation of cell cycle process	1/107	274/18986	0.00364964	0.647589	-0.442357	0.789829	0.816688	0.766018	PRKCE	1
GO:0051259	protein complex oligomerization	1/107	275/18986	0.00363636	0.645234	-0.446137	0.79103	0.817496	0.766776	ARC	1
GO:0010721	negative regulation of cell development	1/107	281/18986	0.00355872	0.631456	-0.468566	0.7981	0.824364	0.773218	INHBA	1
GO:1903039	positive regulation of leukocyte cell-cell adhesion	1/107	284/18986	0.00352113	0.624786	-0.479625	0.801545	0.827483	0.776143	IL12A	1
GO:0043487	regulation of RNA stability	1/107	285/18986	0.00350877	0.622594	-0.483289	0.80268	0.828216	0.776831	CALCR	1
GO:0044843	cell cycle G1/S phase transition	1/107	287/18986	0.00348432	0.618255	-0.490583	0.804932	0.82966	0.778185	INHBA	1
GO:1901988	negative regulation of cell cycle phase transition	1/107	287/18986	0.00348432	0.618255	-0.490583	0.804932	0.82966	0.778185	INHBA	1
GO:0006520	amino acid metabolic process	1/107	289/18986	0.00346021	0.613977	-0.497834	0.807158	0.831074	0.779511	UROC1	1
GO:0061013	regulation of mRNA catabolic process	1/107	289/18986	0.00346021	0.613977	-0.497834	0.807158	0.831074	0.779511	CALCR	1
GO:0040029	epigenetic regulation of gene expression	1/107	295/18986	0.00338983	0.601489	-0.519329	0.813686	0.83691	0.784985	TEX15	1
GO:0051321	meiotic cell cycle	1/107	295/18986	0.00338983	0.601489	-0.519329	0.813686	0.83691	0.784985	TEX15	1
GO:0045861	negative regulation of proteolysis	1/107	303/18986	0.00330033	0.585608	-0.547415	0.822052	0.845067	0.792636	SERPINC1	1
GO:0051347	positive regulation of transferase activity	1/107	304/18986	0.00328947	0.583682	-0.550882	0.823071	0.845668	0.7932	TNFSF15	1
GO:0006959	humoral immune response	1/107	310/18986	0.00322581	0.572385	-0.571478	0.829065	0.851378	0.798555	CR2	1
GO:0042254	ribosome biogenesis	1/107	317/18986	0.00315457	0.559745	-0.595087	0.835805	0.857846	0.804622	ESF1	1
GO:0030217	T cell differentiation	1/107	320/18986	0.003125	0.554498	-0.605072	0.838612	0.860274	0.806899	ZEB1	1
GO:1901293	nucleoside phosphate biosynthetic process	1/107	321/18986	0.00311526	0.55277	-0.608383	0.839537	0.860769	0.807364	NPR1	1
GO:0006302	double-strand break repair	1/107	323/18986	0.00309598	0.549348	-0.614979	0.841372	0.862196	0.808702	TEX15	1
GO:0098813	nuclear chromosome segregation	1/107	324/18986	0.00308642	0.547652	-0.618264	0.842281	0.862673	0.80915	TEX15	1
GO:0045862	positive regulation of proteolysis	1/107	325/18986	0.00307692	0.545967	-0.62154	0.843186	0.863145	0.809593	TNFSF15	1
GO:0009416	response to light stimulus	1/107	326/18986	0.00306748	0.544292	-0.624809	0.844085	0.863611	0.81003	IL12A	1
GO:0010948	negative regulation of cell cycle process	1/107	329/18986	0.00303951	0.539329	-0.634564	0.846752	0.865885	0.812162	INHBA	1
GO:0051345	positive regulation of hydrolase activity	1/107	331/18986	0.00302115	0.53607	-0.641027	0.848505	0.867222	0.813416	TNFSF15	1
GO:0022409	positive regulation of cell-cell adhesion	1/107	336/18986	0.00297619	0.528093	-0.657044	0.8528	0.871154	0.817105	IL12A	1
GO:0060485	mesenchyme development	1/107	341/18986	0.00293255	0.52035	-0.672866	0.856975	0.87488	0.820599	FOXF1	1
GO:0071214	cellular response to abiotic stimulus	1/107	342/18986	0.00292398	0.518828	-0.676007	0.857796	0.87488	0.820599	BMP6	1
GO:0104004	cellular response to environmental stimulus	1/107	342/18986	0.00292398	0.518828	-0.676007	0.857796	0.87488	0.820599	BMP6	1
GO:0009150	purine ribonucleotide metabolic process	1/107	348/18986	0.00287356	0.509883	-0.6947	0.862623	0.879343	0.824785	NPR1	1
GO:0006310	DNA recombination	1/107	352/18986	0.00284091	0.504089	-0.707017	0.865751	0.881608	0.826909	TEX15	1
GO:0032956	regulation of actin cytoskeleton organization	1/107	352/18986	0.00284091	0.504089	-0.707017	0.865751	0.881608	0.826909	PRKCE	1
GO:0006402	mRNA catabolic process	1/107	356/18986	0.00280899	0.498425	-0.719221	0.868809	0.883796	0.828962	CALCR	1
GO:0015980	energy derivation by oxidation of organic compounds	1/107	356/18986	0.00280899	0.498425	-0.719221	0.868809	0.883796	0.828962	IRS2	1
GO:0032535	regulation of cellular component size	1/107	361/18986	0.00277008	0.491521	-0.734321	0.872533	0.887121	0.832081	PRKCE	1
GO:0051090	regulation of DNA-binding transcription factor activity	1/107	363/18986	0.00275482	0.488813	-0.740314	0.873994	0.888142	0.833039	FOXS1	1
GO:0045787	positive regulation of cell cycle	1/107	365/18986	0.00273973	0.486135	-0.74628	0.875438	0.889145	0.833979	PRKCE	1
GO:0009895	negative regulation of catabolic process	1/107	367/18986	0.0027248	0.483486	-0.75222	0.876865	0.88992	0.834706	IL10RA	1
GO:0009259	ribonucleotide metabolic process	1/107	368/18986	0.00271739	0.482172	-0.75518	0.877573	0.88992	0.834706	NPR1	1
GO:1901990	regulation of mitotic cell cycle phase transition	1/107	368/18986	0.00271739	0.482172	-0.75518	0.877573	0.88992	0.834706	INHBA	1
GO:0010639	negative regulation of organelle organization	1/107	371/18986	0.00269542	0.478273	-0.764023	0.879672	0.891584	0.836267	CDH5	1
GO:0010506	regulation of autophagy	1/107	373/18986	0.00268097	0.475708	-0.769887	0.881051	0.892517	0.837142	IL10RA	1
GO:0042176	regulation of protein catabolic process	1/107	374/18986	0.0026738	0.474437	-0.772809	0.881735	0.892745	0.837356	PCSK9	1
GO:0019693	ribose phosphate metabolic process	1/107	376/18986	0.00265957	0.471913	-0.778635	0.883091	0.893653	0.838207	NPR1	1
GO:1903037	regulation of leukocyte cell-cell adhesion	1/107	392/18986	0.00255102	0.452651	-0.824382	0.893398	0.903614	0.84755	IL12A	1
GO:0032970	regulation of actin filament-based process	1/107	395/18986	0.00253165	0.449213	-0.832795	0.895228	0.904994	0.848845	PRKCE	1
GO:0060271	cilium assembly	1/107	398/18986	0.00251256	0.445827	-0.841159	0.897027	0.906342	0.850109	DZIP1L	1
GO:0006979	response to oxidative stress	1/107	405/18986	0.00246914	0.438122	-0.860484	0.901106	0.90999	0.853531	AREG	1
GO:1903311	regulation of mRNA metabolic process	1/107	406/18986	0.00246305	0.437042	-0.863224	0.901675	0.910093	0.853628	CALCR	1
GO:0006401	RNA catabolic process	1/107	412/18986	0.00242718	0.430678	-0.879552	0.905024	0.913	0.856354	CALCR	1
GO:0014706	striated muscle tissue development	1/107	424/18986	0.00235849	0.418489	-0.911667	0.911388	0.918943	0.861929	EGR2	1
GO:0140694	non-membrane-bounded organelle assembly	1/107	425/18986	0.00235294	0.417504	-0.914312	0.911899	0.918982	0.861965	LDB3	1
GO:0022412	cellular process involved in reproduction in multicellular organism	1/107	427/18986	0.00234192	0.415549	-0.919587	0.912911	0.919051	0.86203	INHBA	1
GO:0044782	cilium organization	1/107	427/18986	0.00234192	0.415549	-0.919587	0.912911	0.919051	0.86203	DZIP1L	1
GO:0007059	chromosome segregation	1/107	429/18986	0.002331	0.413611	-0.924843	0.913913	0.919583	0.862529	TEX15	1
GO:0006163	purine nucleotide metabolic process	1/107	440/18986	0.00227273	0.403271	-0.953424	0.91922	0.924424	0.86707	NPR1	1
GO:0141188	nucleic acid catabolic process	1/107	441/18986	0.00226757	0.402357	-0.955995	0.919686	0.924424	0.86707	CALCR	1
GO:0009314	response to radiation	1/107	442/18986	0.00226244	0.401446	-0.958562	0.920149	0.924424	0.86707	IL12A	1
GO:0060537	muscle tissue development	1/107	447/18986	0.00223714	0.396956	-0.971331	0.922427	0.926234	0.868767	EGR2	1
GO:0000280	nuclear division	1/107	451/18986	0.00221729	0.393435	-0.98147	0.924202	0.927499	0.869954	TEX15	1
GO:0010975	regulation of neuron projection development	1/107	452/18986	0.00221239	0.392565	-0.983994	0.92464	0.927499	0.869954	ARC	1
GO:0072594	establishment of protein localization to organelle	1/107	462/18986	0.0021645	0.384068	-1.00901	0.92888	0.931273	0.873493	IL10RA	1
GO:0044772	mitotic cell cycle phase transition	1/107	467/18986	0.00214133	0.379956	-1.02136	0.930911	0.932828	0.874952	INHBA	1
GO:1901987	regulation of cell cycle phase transition	1/107	479/18986	0.00208768	0.370437	-1.05062	0.935553	0.936998	0.878863	INHBA	1
GO:0006091	generation of precursor metabolites and energy	1/107	490/18986	0.00204082	0.362121	-1.07697	0.939536	0.940503	0.882151	IRS2	1
GO:0022613	ribonucleoprotein complex biogenesis	1/107	492/18986	0.00203252	0.360649	-1.08172	0.940234	0.940717	0.882352	ESF1	1
GO:0009117	nucleotide metabolic process	1/107	500/18986	0.002	0.354879	-1.10056	0.942945	0.942945	0.884442	NPR1	1
