# Supplementary material for: A novel ARMC5-containing ubiquitin ligase controls the degradation of HSPA1A and its client protein estrogen receptor alpha
Source: Research Square preprint supplement (doi:10.21203/rs.3.rs-8810312/v1), 2026-02-22
Supplement: Supplementary file 6 [file 7bba2e2cf7a09d390edc94f9.xlsx]

## Sheet: S-Table 4. Differentially expre
S-Table 4. Differentially expressed genes (FC>2, FDR<0.05) in MCF7 cells transfected with vector and treated with E2 vs vehicle according to RNA-seq
ENTREZID	ENSEMBL	GENE SYMBOL	GENE NAME	Log2FC	log2(CPM)	F	p-value	FDR
6297	ENSG00000165821	SALL2	spalt like transcription factor 2	-2.69945	4.79731	945.888	3.8e-10	6.67e-06
254778	ENSG00000169085	VXN	vexin	3.11563	3.37104	497.802	5.92e-09	2.38e-05
4886	ENSG00000164128	NPY1R	neuropeptide Y receptor Y1	1.82294	7.26185	529.173	4.57e-09	2.38e-05
8645	ENSG00000164626	KCNK5	potassium two pore domain channel subfamily K member 5	2.87078	4.07542	525.125	4.72e-09	2.38e-05
9886	ENSG00000072422	RHOBTB1	Rho related BTB domain containing 1	1.64783	5.37036	482.187	6.79e-09	2.38e-05
1836	ENSG00000155850	SLC26A2	solute carrier family 26 member 2	2.2315	6.49189	454.248	8.75e-09	2.56e-05
221662	ENSG00000112183	RBM24	RNA binding motif protein 24	2.41674	4.22707	436.38	1.04e-08	2.61e-05
5174	ENSG00000174827	PDZK1	PDZ domain containing 1	2.96483	2.56596	412.433	1.32e-08	2.61e-05
57493	ENSG00000173706	HEG1	heart development protein with EGF like domains 1	3.58878	3.80665	401.609	1.48e-08	2.61e-05
79929	ENSG00000180834	MAP6D1	MAP6 domain containing 1	1.7715	4.87351	401.031	1.49e-08	2.61e-05
24147	ENSG00000179431	FJX1	four-jointed box kinase 1	1.77921	4.78064	373.186	2.02e-08	3.05e-05
57523	ENSG00000205978	NYNRIN	NYN domain and retroviral integrase containing	-1.85073	4.29744	370.467	2.08e-08	3.05e-05
26353	ENSG00000152137	HSPB8	heat shock protein family B (small) member 8	1.83266	7.67069	351.851	2.59e-08	3.25e-05
5979	ENSG00000165731	RET	ret proto-oncogene	1.70232	6.45969	356.311	2.45e-08	3.25e-05
23223	ENSG00000052749	RRP12	ribosomal RNA processing 12 homolog	1.36096	6.07898	343.162	2.88e-08	3.37e-05
158046	ENSG00000130045	NXNL2	nucleoredoxin like 2	1.90342	3.31708	320.027	3.87e-08	3.63e-05
2296	ENSG00000054598	FOXC1	forkhead box C1	2.18254	4.86674	330.713	3.37e-08	3.63e-05
80324	ENSG00000177192	PUS1	pseudouridine synthase 1	1.35597	5.87058	318.865	3.93e-08	3.63e-05
94122	ENSG00000147041	SYTL5	synaptotagmin like 5	1.50553	4.449	319.043	3.92e-08	3.63e-05
4143	ENSG00000151224	MAT1A	methionine adenosyltransferase 1A	3.47862	1.93721	301.533	4.97e-08	3.97e-05
63035	ENSG00000085185	BCORL1	BCL6 corepressor like 1	-2.32987	4.6687	305.868	4.68e-08	3.97e-05
861	ENSG00000159216	RUNX1	RUNX family transcription factor 1	1.6891	6.03781	302.315	4.92e-08	3.97e-05
9816	ENSG00000135763	URB2	URB2 ribosome biogenesis homolog	1.31333	5.70541	296.775	5.32e-08	4.06e-05
3754	ENSG00000162975	KCNF1	potassium voltage-gated channel modifier subfamily F member 1	2.81946	3.19445	292.745	5.63e-08	4.12e-05
4609	ENSG00000136997	MYC	MYC proto-oncogene, bHLH transcription factor	1.45129	7.36221	281.746	6.62e-08	4.47e-05
54549	ENSG00000069188	SDK2	sidekick cell adhesion molecule 2	2.11287	2.98381	281.777	6.62e-08	4.47e-05
79605	ENSG00000177614	PGBD5	piggyBac transposable element derived 5	2.0012	3.06179	279.217	6.88e-08	4.47e-05
3860	ENSG00000171401	KRT13	keratin 13	4.81746	0.845588	275.103	7.32e-08	4.59e-05
10125	ENSG00000172575	RASGRP1	RAS guanyl releasing protein 1	2.39441	5.93305	262.845	9.3e-08	5.03e-05
113230	ENSG00000141854	MISP3	MISP family member 3	-1.3894	4.91876	258.46	9.52e-08	5.03e-05
23286	ENSG00000113645	WWC1	WW and C2 domain containing 1	1.22575	7.00937	257.093	9.73e-08	5.03e-05
27202	ENSG00000134830	C5AR2	complement C5a receptor 2	1.60405	3.7101	262.781	8.87e-08	5.03e-05
6584	ENSG00000197375	SLC22A5	solute carrier family 22 member 5	1.52106	5.68313	261.978	8.99e-08	5.03e-05
771	ENSG00000074410	CA12	carbonic anhydrase 12	1.39345	8.93886	260.957	9.14e-08	5.03e-05
55565	ENSG00000102984	ZNF821	zinc finger protein 821	-1.47531	4.34901	254.427	1.02e-07	5.1e-05
118980	ENSG00000156398	SFXN2	sideroflexin 2	1.715	5.10309	250.531	1.08e-07	5.15e-05
51317	ENSG00000135365	PHF21A	PHD finger protein 21A	-1.34303	4.93294	250.752	1.08e-07	5.15e-05
6840	ENSG00000197321	SVIL	supervillin	1.14245	7.54592	248.406	1.12e-07	5.2e-05
6875	ENSG00000141384	TAF4B	TATA-box binding protein associated factor 4b	1.5529	4.47189	245.119	1.19e-07	5.27e-05
7052	ENSG00000198959	TGM2	transglutaminase 2	3.34385	1.85527	244.535	1.2e-07	5.27e-05
102724515	ENSG00000204792	LINC01291	long intergenic non-protein coding RNA 1291	1.96533	2.75633	238.873	1.32e-07	5.29e-05
3055	ENSG00000101336	HCK	HCK proto-oncogene, Src family tyrosine kinase	3.1689	1.58804	241.391	1.27e-07	5.29e-05
8000	ENSG00000167653	PSCA	prostate stem cell antigen	-2.01706	3.59201	240.804	1.28e-07	5.29e-05
80757	ENSG00000184986	TMEM121	transmembrane protein 121	-1.8216	3.62694	239.111	1.32e-07	5.29e-05
10885	ENSG00000065183	WDR3	WD repeat domain 3	1.34826	6.4113	237.21	1.36e-07	5.33e-05
9203	ENSG00000147130	ZMYM3	zinc finger MYM-type containing 3	-1.18931	5.60422	234.74	1.43e-07	5.44e-05
80746	ENSG00000154743	TSEN2	tRNA splicing endonuclease subunit 2	1.20838	5.03318	232.644	1.48e-07	5.53e-05
220992	ENSG00000198298	ZNF485	zinc finger protein 485	1.55208	3.86429	228.288	1.6e-07	5.86e-05
168544	ENSG00000181444	ZNF467	zinc finger protein 467	-1.30491	6.38118	226.66	1.65e-07	5.92e-05
23212	ENSG00000179041	RRS1	ribosome biogenesis regulator 1 homolog	1.50747	6.30777	223.574	1.75e-07	6.02e-05
23670	ENSG00000135048	CEMIP2	cell migration inducing hyaluronidase 2	1.45554	6.80923	223.712	1.74e-07	6.02e-05
25976	ENSG00000163659	TIPARP	TCDD inducible poly(ADP-ribose) polymerase	1.43704	5.48517	220.642	1.85e-07	6.12e-05
7074	ENSG00000156299	TIAM1	TIAM Rac1 associated GEF 1	1.51191	4.68117	220.63	1.85e-07	6.12e-05
11098	ENSG00000150687	PRSS23	serine protease 23	1.67283	5.72767	218.042	1.94e-07	6.22e-05
140685	ENSG00000130584	ZBTB46	zinc finger and BTB domain containing 46	-1.26073	4.52792	215.853	2.02e-07	6.22e-05
55809	ENSG00000124496	TRERF1	transcriptional regulating factor 1	-1.60032	5.89591	215.112	2.05e-07	6.22e-05
56172	ENSG00000154122	ANKH	ANKH inorganic pyrophosphate transport regulator	1.17885	4.6972	215.868	2.02e-07	6.22e-05
9569	ENSG00000006704	GTF2IRD1	GTF2I repeat domain containing 1	-1.80664	5.32919	215.64	2.03e-07	6.22e-05
283578	ENSG00000100580	TMED8	transmembrane p24 trafficking protein family member 8	1.2715	7.02789	210.178	2.26e-07	6.74e-05
25865	ENSG00000105287	PRKD2	protein kinase D2	-1.20786	5.99832	204.589	2.53e-07	6.84e-05
2633	ENSG00000117228	GBP1	guanylate binding protein 1	1.6652	3.05774	205.775	2.47e-07	6.84e-05
2886	ENSG00000141738	GRB7	growth factor receptor bound protein 7	-1.61772	3.76774	205.859	2.47e-07	6.84e-05
5097	ENSG00000156453	PCDH1	protocadherin 1	-1.59181	4.73854	208.237	2.35e-07	6.84e-05
55672	ENSG00000219481	NBPF1	NBPF member 1	1.28872	5.20394	207.652	2.38e-07	6.84e-05
57224	ENSG00000135540	NHSL1	NHS like 1	1.25257	5.0283	204.819	2.52e-07	6.84e-05
9181	ENSG00000116584	ARHGEF2	Rho/Rac guanine nucleotide exchange factor 2	-1.08737	5.70433	203.167	2.61e-07	6.94e-05
25929	ENSG00000082516	GEMIN5	gem nuclear organelle associated protein 5	1.07482	6.37302	201.159	2.72e-07	7.02e-05
83732	ENSG00000124784	RIOK1	RIO kinase 1	1.22143	4.93584	201.695	2.69e-07	7.02e-05
26018	ENSG00000144749	LRIG1	leucine rich repeats and immunoglobulin like domains 1	1.04864	5.97758	199.502	2.81e-07	7.07e-05
79134	ENSG00000226479	TMEM185B	transmembrane protein 185B	1.04231	6.39627	198.992	2.84e-07	7.07e-05
90427	ENSG00000104081	BMF	Bcl2 modifying factor	-1.39485	4.54016	198.749	2.86e-07	7.07e-05
9687	ENSG00000196208	GREB1	growth regulating estrogen receptor binding 1	1.48598	8.88285	195.332	3.07e-07	7.49e-05
2274	ENSG00000115641	FHL2	four and a half LIM domains 2	2.06914	3.9203	190.79	3.39e-07	8.04e-05
7005	ENSG00000007866	TEAD3	TEA domain transcription factor 3	-1.00826	5.88256	191.051	3.37e-07	8.04e-05
1545	ENSG00000138061	CYP1B1	cytochrome P450 family 1 subfamily B member 1	1.98961	7.85719	189.838	3.54e-07	8.3e-05
9619	ENSG00000160179	ABCG1	ATP binding cassette subfamily G member 1	-1.0769	6.46333	187.75	3.62e-07	8.37e-05
4602	ENSG00000118513	MYB	MYB proto-oncogene, transcription factor	1.30067	6.00265	186.587	3.72e-07	8.48e-05
7464	ENSG00000106789	CORO2A	coronin 2A	-1.20442	4.74025	184.929	3.86e-07	8.68e-05
9846	ENSG00000033327	GAB2	GRB2 associated binding protein 2	1.06886	5.57765	183.366	3.99e-07	8.88e-05
794	ENSG00000172137	CALB2	calbindin 2	3.93463	1.43798	181.583	4.16e-07	9.13e-05
1543	ENSG00000140465	CYP1A1	cytochrome P450 family 1 subfamily A member 1	2.13655	6.35641	190.051	4.61e-07	9.48e-05
23160	ENSG00000163811	WDR43	WD repeat domain 43	1.00759	7.16591	174.476	4.91e-07	9.48e-05
3487	ENSG00000141753	IGFBP4	insulin like growth factor binding protein 4	1.1579	8.05148	177.685	4.55e-07	9.48e-05
440465	ENSG00000226137	BAIAP2-DT	BAIAP2 divergent transcript	-1.354	4.20308	178.495	4.47e-07	9.48e-05
51760	ENSG00000103528	SYT17	synaptotagmin 17	-1.30687	4.37667	175.311	4.81e-07	9.48e-05
5465	ENSG00000186951	PPARA	peroxisome proliferator activated receptor alpha	-1.37036	3.75198	178.996	4.41e-07	9.48e-05
56652	ENSG00000107815	TWNK	twinkle mtDNA helicase	1.29928	5.60154	176.565	4.67e-07	9.48e-05
59339	ENSG00000169499	PLEKHA2	pleckstrin homology domain containing A2	-1.25798	4.27022	174.879	4.86e-07	9.48e-05
60437	ENSG00000124215	CDH26	cadherin 26	2.83407	1.76099	174.623	4.89e-07	9.48e-05
860	ENSG00000124813	RUNX2	RUNX family transcription factor 2	1.34069	4.33819	177.328	4.59e-07	9.48e-05
94241	ENSG00000164938	TP53INP1	tumor protein p53 inducible nuclear protein 1	-1.15632	6.4419	173.644	5.01e-07	9.56e-05
10171	ENSG00000120158	RCL1	RNA terminal phosphate cyclase like 1	1.4385	5.40008	172.468	5.15e-07	9.73e-05
29995	ENSG00000071282	LMCD1	LIM and cysteine rich domains 1	1.47903	5.01929	170.509	5.4e-07	9.98e-05
56999	ENSG00000163638	ADAMTS9	ADAM metallopeptidase with thrombospondin type 1 motif 9	1.70702	3.58121	170.587	5.39e-07	9.98e-05
1736	ENSG00000130826	DKC1	dyskerin pseudouridine synthase 1	1.11319	7.30299	168.747	5.64e-07	0.00010156
55199	ENSG00000158483	FAM86C1P	family with sequence similarity 86 member C1, pseudogene	1.18142	4.15667	168.145	5.72e-07	0.00010156
7039	ENSG00000163235	TGFA	transforming growth factor alpha	1.98171	3.70653	168.125	5.72e-07	0.00010156
79754	ENSG00000196372	ASB13	ankyrin repeat and SOCS box containing 13	1.05337	5.74348	168.756	5.64e-07	0.00010156
257364	ENSG00000173548	SNX33	sorting nexin 33	-1.16131	4.71315	165.944	6.04e-07	0.000105808
6478	ENSG00000181788	SIAH2	siah E3 ubiquitin protein ligase 2	1.45258	7.67362	165.27	6.14e-07	0.000105808
84187	ENSG00000157600	TMEM164	transmembrane protein 164	1.32473	4.80486	165.432	6.12e-07	0.000105808
100507584	ENSG00000249346	LINC01016	long intergenic non-protein coding RNA 1016	4.5412	3.2739	198.566	6.87e-07	0.000116094
118738	ENSG00000265763	ZNF488	zinc finger protein 488	2.92246	0.928483	160.242	6.98e-07	0.000116779
10439	ENSG00000130558	OLFM1	olfactomedin 1	1.0477	5.92195	158	7.4e-07	0.000122606
157285	ENSG00000275342	PRAG1	PEAK1 related, kinase-activating pseudokinase 1	1.0979	5.94861	156.56	7.68e-07	0.00012382
1628	ENSG00000105516	DBP	D-box binding PAR bZIP transcription factor	-1.56967	4.90456	156.75	7.64e-07	0.00012382
4603	ENSG00000185697	MYBL1	MYB proto-oncogene like 1	2.59716	6.15125	190.079	7.6e-07	0.00012382
8908	ENSG00000056998	GYG2	glycogenin 2	-1.22085	3.9703	155.814	7.84e-07	0.000125135
51491	ENSG00000048162	NOP16	NOP16 nucleolar protein	1.26561	5.78755	154.384	8.14e-07	0.000128811
92979	ENSG00000139266	MARCHF9	membrane associated ring-CH-type finger 9	-1.06521	4.89523	153.852	8.26e-07	0.000129488
4234	ENSG00000037897	METTL1	methyltransferase 1, tRNA methylguanosine	1.66141	5.07855	153.382	8.36e-07	0.00012997
146330	ENSG00000127585	FBXL16	F-box and leucine rich repeat protein 16	-1.15014	5.54608	151.852	8.71e-07	0.000131949
115708	ENSG00000166166	TRMT61A	tRNA methyltransferase 61A	1.0283	5.40375	149.109	9.39e-07	0.000134797
1802	ENSG00000132768	DPH2	diphthamide biosynthesis 2	1.09743	5.20852	149.862	9.2e-07	0.000134797
23007	ENSG00000114805	PLCH1	phospholipase C eta 1	-1.31067	4.3441	150.626	9.01e-07	0.000134797
51559	ENSG00000111696	NT5DC3	5'-nucleotidase domain containing 3	1.70756	3.85713	148.931	9.44e-07	0.000134797
79828	ENSG00000123600	METTL8	methyltransferase 8, tRNA N3-cytidine	1.03521	4.78228	150.136	9.13e-07	0.000134797
7100	ENSG00000187554	TLR5	toll like receptor 5	1.67084	2.50924	148.556	9.54e-07	0.000135102
3756	ENSG00000143473	KCNH1	potassium voltage-gated channel subfamily H member 1	2.24737	1.82876	148.132	9.65e-07	0.000135608
3708	ENSG00000150995	ITPR1	inositol 1,4,5-trisphosphate receptor type 1	1.88773	4.24018	146.796	1e-06	0.000139636
342184	ENSG00000248905	FMN1	formin 1	1.6375	4.49262	145.103	1.05e-06	0.000143052
3909	ENSG00000053747	LAMA3	laminin subunit alpha 3	1.66691	4.94409	142.62	1.13e-06	0.000150066
54865	ENSG00000160818	GPATCH4	G-patch domain containing 4 (gene/pseudogene)	1.01363	6.13791	140.966	1.18e-06	0.000156241
6563	ENSG00000141469	SLC14A1	solute carrier family 14 member 1 (Kidd blood group)	2.97733	0.915021	139.601	1.23e-06	0.000161392
7450	ENSG00000110799	VWF	von Willebrand factor	3.11151	1.00712	139.084	1.25e-06	0.000162653
4773	ENSG00000101096	NFATC2	nuclear factor of activated T cells 2	1.09139	5.87267	137.617	1.31e-06	0.000168625
3128	ENSG00000290878	HLA-DRB6	major histocompatibility complex, class II, DR beta 6 (pseudogene)	2.87845	1.86004	137.256	1.32e-06	0.000169209
64318	ENSG00000173145	NOC3L	NOC3 like DNA replication regulator	1.1992	5.16835	136.334	1.36e-06	0.000172681
80320	ENSG00000189120	SP6	Sp6 transcription factor	-1.23131	4.60889	135.495	1.39e-06	0.000174572
10475	ENSG00000112343	TRIM38	tripartite motif containing 38	-1.23555	4.35886	133.071	1.5e-06	0.000184016
29914	ENSG00000120942	UBIAD1	UbiA prenyltransferase domain containing 1	1.2731	4.72251	133.491	1.48e-06	0.000184016
22822	ENSG00000139289	PHLDA1	pleckstrin homology like domain family A member 1	1.58519	6.42615	132.487	1.54e-06	0.000184496
2535	ENSG00000180340	FZD2	frizzled class receptor 2	-1.15822	3.70056	132.311	1.53e-06	0.000184496
2669	ENSG00000164949	GEM	GTP binding protein overexpressed in skeletal muscle	1.81918	3.27164	130.7	1.61e-06	0.000184496
330	ENSG00000023445	BIRC3	baculoviral IAP repeat containing 3	1.62224	3.44746	131.127	1.59e-06	0.000184496
64798	ENSG00000155792	DEPTOR	DEP domain containing MTOR interacting protein	1.21737	4.82206	131.951	1.55e-06	0.000184496
80820	ENSG00000122547	EEPD1	endonuclease/exonuclease/phosphatase family domain containing 1	2.17593	1.9237	130.964	1.6e-06	0.000184496
9188	ENSG00000165732	DDX21	DExD-box helicase 21	1.11305	8.4045	131.637	1.57e-06	0.000184496
92935	ENSG00000247626	MARS2	methionyl-tRNA synthetase 2, mitochondrial	1.10819	5.12427	132.033	1.55e-06	0.000184496
9645	ENSG00000133816	MICAL2	microtubule associated monooxygenase, calponin and LIM domain containing 2	1.16197	4.59822	131.074	1.59e-06	0.000184496
23498	ENSG00000162882	HAAO	3-hydroxyanthranilate 3,4-dioxygenase	3.0568	0.247238	130.316	1.63e-06	0.000184909
55244	ENSG00000142494	SLC47A1	solute carrier family 47 member 1	3.38284	0.132049	130.114	1.64e-06	0.000184909
84456	ENSG00000198945	L3MBTL3	L3MBTL histone methyl-lysine binding protein 3	-1.94554	1.54993	127.751	1.77e-06	0.000195513
81792	ENSG00000151388	ADAMTS12	ADAM metallopeptidase with thrombospondin type 1 motif 12	2.71562	0.70739	124.776	1.95e-06	0.000212554
9722	ENSG00000198929	NOS1AP	nitric oxide synthase 1 adaptor protein	1.6572	4.5649	123.774	2.01e-06	0.000214331
1960	ENSG00000179388	EGR3	early growth response 3	2.79293	5.0056	154.272	2.23e-06	0.000232847
2494	ENSG00000116833	NR5A2	nuclear receptor subfamily 5 group A member 2	3.84936	1.35336	120.673	2.23e-06	0.000232847
57605	ENSG00000090975	PITPNM2	phosphatidylinositol transfer protein membrane associated 2	1.5022	3.60729	120.568	2.24e-06	0.000232847
27340	ENSG00000120800	UTP20	UTP20 small subunit processome component	1.17547	5.80349	119.215	2.35e-06	0.000235379
5152	ENSG00000160191	PDE9A	phosphodiesterase 9A	-1.11017	3.81014	118.887	2.37e-06	0.000235379
6446	ENSG00000118515	SGK1	serum/glucocorticoid regulated kinase 1	2.06564	3.1214	118.937	2.37e-06	0.000235379
6566	ENSG00000155380	SLC16A1	solute carrier family 16 member 1	1.05207	4.35332	119.319	2.34e-06	0.000235379
79080	ENSG00000110104	CCDC86	coiled-coil domain containing 86	1.18634	5.93719	119.864	2.29e-06	0.000235379
155382	ENSG00000176428	VPS37D	VPS37D subunit of ESCRT-I	-1.89737	2.12299	118.564	2.4e-06	0.000236657
262	ENSG00000123505	AMD1	adenosylmethionine decarboxylase 1	1.17775	7.48458	117.357	2.5e-06	0.000242614
2355	ENSG00000075426	FOSL2	FOS like 2, AP-1 transcription factor subunit	1.07338	7.51903	117.042	2.53e-06	0.000243921
705	ENSG00000112578	BYSL	bystin like	1.04177	5.65133	116.652	2.56e-06	0.000245899
10849	ENSG00000117877	POLR1G	RNA polymerase I subunit G	1.39516	4.11234	115.958	2.62e-06	0.000249082
164832	ENSG00000170500	LONRF2	LON peptidase N-terminal domain and ring finger 2	1.47346	6.52307	116.289	2.62e-06	0.000249082
79896	ENSG00000185875	THNSL1	threonine synthase like 1	1.14904	5.86925	115.199	2.7e-06	0.000251443
8291	ENSG00000135636	DYSF	dysferlin	2.87873	0.906629	114.048	2.81e-06	0.000256002
133308	ENSG00000164038	SLC9B2	solute carrier family 9 member B2	1.42269	2.83108	112.809	2.93e-06	0.000260571
134	ENSG00000163485	ADORA1	adenosine A1 receptor	1.85782	2.66732	112.483	2.97e-06	0.000260571
200942	ENSG00000185909	KLHDC8B	kelch domain containing 8B	-1.36369	3.20405	112.228	3e-06	0.000260571
143458	ENSG00000179241	LDLRAD3	low density lipoprotein receptor class A domain containing 3	1.01693	3.62408	111.394	3.09e-06	0.000264755
1662	ENSG00000178105	DDX10	DEAD-box helicase 10	1.37896	4.9199	110.552	3.18e-06	0.000271549
222183	ENSG00000177679	SRRM3	serine/arginine repetitive matrix 3	-1.4102	3.92214	110.155	3.23e-06	0.000271575
29948	ENSG00000140961	OSGIN1	oxidative stress induced growth inhibitor 1	1.25495	4.5316	110.239	3.22e-06	0.000271575
3223	ENSG00000197757	HOXC6	homeobox C6	-1.42682	2.44377	108.729	3.41e-06	0.000280889
65260	ENSG00000162377	COA7	cytochrome c oxidase assembly factor 7	1.00863	5.47885	108.602	3.42e-06	0.000280889
594855	ENSG00000213578	CPLX3	complexin 3	3.47936	-0.161097	107.52	3.56e-06	0.000285808
26287	ENSG00000165887	ANKRD2	ankyrin repeat domain 2	3.99696	0.793502	106.724	3.67e-06	0.000290267
348926	ENSG00000290374	FAM86EP	family with sequence similarity 86, member A pseudogene	1.10606	3.80298	106.629	3.68e-06	0.000290267
317	ENSG00000120868	APAF1	apoptotic peptidase activating factor 1	-1.14826	4.45342	106.251	3.74e-06	0.000291488
144577	ENSG00000174206	KICS2	KICSTOR subunit 2	1.36507	5.40827	105.276	3.88e-06	0.0002989
9543	ENSG00000174498	IGDCC3	immunoglobulin superfamily DCC subclass member 3	-1.02301	4.11878	105.122	3.9e-06	0.000299364
55222	ENSG00000172731	LRRC20	leucine rich repeat containing 20	-1.35781	3.47384	104.39	4.01e-06	0.000306576
140688	ENSG00000197183	NOL4L	nucleolar protein 4 like	-1.9359	4.71846	113.017	4.06e-06	0.00030891
11248	ENSG00000182575	NXPH3	neurexophilin 3	1.98245	2.33686	103.301	4.19e-06	0.00031469
388228	ENSG00000188322	SBK1	SH3 domain binding kinase 1	-1.56805	5.82951	107.669	4.25e-06	0.00031607
7057	ENSG00000137801	THBS1	thrombospondin 1	1.11598	8.01737	102.725	4.28e-06	0.000316086
10799	ENSG00000124787	RPP40	ribonuclease P/MRP subunit p40	1.35666	4.2398	102.19	4.37e-06	0.000318775
84864	ENSG00000170854	RIOX2	ribosomal oxygenase 2	1.18439	5.23415	102.219	4.37e-06	0.000318775
23657	ENSG00000151012	SLC7A11	solute carrier family 7 member 11	1.47929	4.40011	101.043	4.58e-06	0.000328138
9424	ENSG00000099337	KCNK6	potassium two pore domain channel subfamily K member 6	1.24292	6.0022	100.733	4.63e-06	0.000330858
5507	ENSG00000119938	PPP1R3C	protein phosphatase 1 regulatory subunit 3C	-1.21321	5.60212	100.161	4.74e-06	0.000334439
3790	ENSG00000170745	KCNS3	potassium voltage-gated channel modifier subfamily S member 3	-1.08037	4.04799	99.4632	4.88e-06	0.000339869
54498	ENSG00000088826	SMOX	spermine oxidase	1.7011	3.04349	98.3713	5.1e-06	0.000349293
158763	ENSG00000147256	ARHGAP36	Rho GTPase activating protein 36	3.3225	-0.215356	97.88	5.2e-06	0.000352676
400793	ENSG00000239887	C1orf226	chromosome 1 open reading frame 226	1.66219	5.78688	105.295	5.38e-06	0.000359364
81929	ENSG00000085415	SEH1L	SEH1 like nucleoporin	1.03857	5.88074	97.0712	5.38e-06	0.000359364
2852	ENSG00000164850	GPER1	G protein-coupled estrogen receptor 1	-1.56251	4.72656	95.9463	5.69e-06	0.000371703
1944	ENSG00000143590	EFNA3	ephrin A3	-1.57049	5.0864	97.7112	5.8e-06	0.000377619
64377	ENSG00000124302	CHST8	carbohydrate sulfotransferase 8	2.64038	0.795083	94.6856	5.94e-06	0.000384584
283576	ENSG00000177108	ZDHHC22	zinc finger DHHC-type palmitoyltransferase 22	3.23272	0.187125	93.4228	6.27e-06	0.000398845
29078	ENSG00000123545	NDUFAF4	NADH:ubiquinone oxidoreductase complex assembly factor 4	1.20395	4.06113	93.4239	6.27e-06	0.000398845
90634	ENSG00000139597	N4BP2L1	NEDD4 binding protein 2 like 1	-1.7548	1.9028	93.5671	6.23e-06	0.000398845
51388	ENSG00000132603	NIP7	nucleolar pre-rRNA processing protein NIP7	1.02761	6.70611	92.8668	6.42e-06	0.000406997
27295	ENSG00000154553	PDLIM3	PDZ and LIM domain 3	2.97765	-0.178096	92.7798	6.44e-06	0.000407055
57539	ENSG00000118965	WDR35	WD repeat domain 35	1.0863	4.42469	92.4372	6.54e-06	0.000407254
64699	ENSG00000160183	TMPRSS3	transmembrane serine protease 3	1.56379	2.5046	92.1678	6.61e-06	0.000408079
54751	ENSG00000162458	FBLIM1	filamin binding LIM protein 1	-1.10178	3.25028	92.0583	6.65e-06	0.000408197
80256	ENSG00000005238	ATOSB	atos homolog B	-1.26495	3.63913	91.8823	6.7e-06	0.000409895
2626	ENSG00000136574	GATA4	GATA binding protein 4	4.36109	0.552909	91.443	6.83e-06	0.000414918
4772	ENSG00000131196	NFATC1	nuclear factor of activated T cells 1	-1.10786	3.5873	90.6043	7.08e-06	0.000426028
23493	ENSG00000135547	HEY2	hes related family bHLH transcription factor with YRPW motif 2	2.62828	1.05687	90.0549	7.25e-06	0.000433514
10687	ENSG00000240694	PNMA2	PNMA family member 2	-1.64513	1.79091	89.2912	7.51e-06	0.000440975
200845	ENSG00000168301	KCTD6	potassium channel tetramerization domain containing 6	1.02738	3.3206	89.4009	7.47e-06	0.000440975
3707	ENSG00000143772	ITPKB	inositol-trisphosphate 3-kinase B	-1.01134	4.67092	88.0461	7.94e-06	0.000461693
55003	ENSG00000111845	PAK1IP1	PAK1 interacting protein 1	1.04141	5.3352	87.7402	8.05e-06	0.000462741
57478	ENSG00000103404	USP31	ubiquitin specific peptidase 31	1.0075	6.15055	87.5983	8.1e-06	0.000463478
7041	ENSG00000140682	TGFB1I1	transforming growth factor beta 1 induced transcript 1	-1.11569	3.27864	87.1238	8.28e-06	0.000464516
7903	ENSG00000113532	ST8SIA4	ST8 alpha-N-acetyl-neuraminide alpha-2,8-sialyltransferase 4	-1.14836	5.02341	86.9641	8.34e-06	0.000466425
116071	ENSG00000168062	BATF2	basic leucine zipper ATF-like transcription factor 2	-1.38409	2.93903	86.1761	8.64e-06	0.000479022
85441	ENSG00000130589	HELZ2	helicase with zinc finger 2	-1.07319	8.44668	85.4834	8.92e-06	0.000486938
55646	ENSG00000145220	LYAR	Ly1 antibody reactive	1.25472	5.05466	84.7225	9.25e-06	0.000502957
2353	ENSG00000170345	FOS	Fos proto-oncogene, AP-1 transcription factor subunit	1.01938	5.9187	84.6494	9.28e-06	0.000503123
192134	ENSG00000198488	B3GNT6	UDP-GlcNAc:betaGal beta-1,3-N-acetylglucosaminyltransferase 6	6.26023	-1.29077	84.3057	9.43e-06	0.000508169
89797	ENSG00000166833	NAV2	neuron navigator 2	2.50055	3.82454	99.3317	9.51e-06	0.00050952
7942	ENSG00000112561	TFEB	transcription factor EB	-1.74222	1.23062	83.4596	9.81e-06	0.00051468
84365	ENSG00000155438	NIFK	nucleolar protein interacting with the FHA domain of MKI67	1.06167	5.79486	83.4623	9.81e-06	0.00051468
101929780	ENSG00000291005	NBPF25P	NBPF member 25, pseudogene	1.24818	2.48732	83.0021	1e-05	0.000519068
11278	ENSG00000118922	KLF12	KLF transcription factor 12	-1.36622	3.11889	82.3027	1.04e-05	0.000531228
55701	ENSG00000165801	ARHGEF40	Rho guanine nucleotide exchange factor 40	-1.39358	2.9167	81.1933	1.09e-05	0.000547734
79633	ENSG00000196159	FAT4	FAT atypical cadherin 4	1.53958	3.20665	81.274	1.09e-05	0.000547734
3087	ENSG00000152804	HHEX	hematopoietically expressed homeobox	-1.44553	1.8624	80.4103	1.14e-05	0.00056428
148545	ENSG00000196427	NBPF4	NBPF member 4	2.05751	2.08965	79.7803	1.17e-05	0.000578743
126375	ENSG00000180884	ZNF792	zinc finger protein 792	-1.13979	2.78316	77.7837	1.3e-05	0.000625538
54906	ENSG00000108021	TASOR2	transcription activation suppressor family member 2	1.01196	7.93514	77.4462	1.32e-05	0.000631132
27198	ENSG00000196917	HCAR1	hydroxycarboxylic acid receptor 1	-1.1375	4.28921	77.2625	1.33e-05	0.000632409
5083	ENSG00000198807	PAX9	paired box 9	1.00387	3.16257	77.1769	1.34e-05	0.000632409
27443	ENSG00000099954	CECR2	CECR2 histone acetyl-lysine reader	-1.12271	4.04112	76.7639	1.37e-05	0.000632793
56902	ENSG00000115946	PNO1	partner of NOB1 homolog	1.01292	5.75934	76.8264	1.36e-05	0.000632793
165215	ENSG00000144369	FAM171B	family with sequence similarity 171 member B	-1.20433	5.44956	76.6177	1.38e-05	0.000635878
342527	ENSG00000188176	SMTNL2	smoothelin like 2	1.65818	2.47839	76.1006	1.41e-05	0.000645734
57787	ENSG00000007047	MARK4	microtubule affinity regulating kinase 4	-1.07006	4.78156	76.0217	1.42e-05	0.000645734
7164	ENSG00000111907	TPD52L1	TPD52 like 1	1.07913	7.85171	76.1301	1.41e-05	0.000645734
100287482	ENSG00000240204	SMKR1	small lysine rich protein 1	1.06516	3.122	75.9249	1.43e-05	0.000647062
4099	ENSG00000105695	MAG	myelin associated glycoprotein	2.80716	-0.127432	74.6101	1.53e-05	0.000680663
3760	ENSG00000162989	KCNJ3	potassium inwardly rectifying channel subfamily J member 3	-1.09233	5.35452	74.2655	1.55e-05	0.000687891
857	ENSG00000105974	CAV1	caveolin 1	1.51203	3.42037	73.8067	1.59e-05	0.000696033
9413	ENSG00000135063	ENTREP1	endosomal transmembrane epsin interactor 1	2.50301	0.221724	73.0721	1.66e-05	0.000718471
1906	ENSG00000078401	EDN1	endothelin 1	1.2155	3.06087	72.9977	1.66e-05	0.000719565
440503	ENSG00000214456	PLIN5	perilipin 5	1.68688	2.46735	72.67	1.69e-05	0.000728755
348093	ENSG00000166831	RBPMS2	RNA binding protein, mRNA processing factor 2	-1.62526	1.48919	72.5644	1.7e-05	0.000729335
29104	ENSG00000156239	N6AMT1	N-6 adenine-specific DNA methyltransferase 1	1.02363	3.54892	72.4285	1.71e-05	0.000729624
56920	ENSG00000010319	SEMA3G	semaphorin 3G	3.70028	1.00964	72.7527	1.72e-05	0.000730188
8309	ENSG00000168306	ACOX2	acyl-CoA oxidase 2	2.3593	0.503467	71.4942	1.8e-05	0.000750958
1591	ENSG00000019186	CYP24A1	cytochrome P450 family 24 subfamily A member 1	3.20377	1.39324	71.7993	1.82e-05	0.000755825
23678	ENSG00000104205	SGK3	serum/glucocorticoid regulated kinase family member 3	2.34506	0.0370298	71.0868	1.84e-05	0.000762483
3717	ENSG00000096968	JAK2	Janus kinase 2	1.64933	5.30641	79.6509	1.89e-05	0.000769715
3757	ENSG00000055118	KCNH2	potassium voltage-gated channel subfamily H member 2	-1.34315	3.83654	70.568	1.9e-05	0.000770092
23616	ENSG00000100092	SH3BP1	SH3 domain binding protein 1	-1.16885	3.08571	70.4024	1.92e-05	0.00077183
54984	ENSG00000254093	PINX1	PIN2 (TERF1) interacting telomerase inhibitor 1	1.04044	3.13046	70.4276	1.91e-05	0.00077183
54345	ENSG00000203883	SOX18	SRY-box transcription factor 18	-1.57253	1.4203	70.2173	1.94e-05	0.000772704
152485	ENSG00000151612	ZNF827	zinc finger protein 827	-1.42943	2.9481	70.1522	1.94e-05	0.000773745
3706	ENSG00000137825	ITPKA	inositol-trisphosphate 3-kinase A	-1.50801	1.50071	69.2824	2.04e-05	0.000796598
10461	ENSG00000153208	MERTK	MER proto-oncogene, tyrosine kinase	1.62487	1.82301	68.4957	2.13e-05	0.000821255
5241	ENSG00000082175	PGR	progesterone receptor	2.30213	4.66995	87.5707	2.14e-05	0.000822248
1303	ENSG00000111799	COL12A1	collagen type XII alpha 1 chain	1.47221	6.01641	74.87	2.29e-05	0.000867481
26011	ENSG00000149256	TENM4	teneurin transmembrane protein 4	1.65865	3.08428	67.198	2.3e-05	0.000867481
51175	ENSG00000074935	TUBE1	tubulin epsilon 1	1.19192	2.97723	67.2715	2.29e-05	0.000867481
283551	ENSG00000214900	LINC01588	long intergenic non-protein coding RNA 1588	1.40289	3.13996	67.0988	2.31e-05	0.000869762
653	ENSG00000112175	BMP5	bone morphogenetic protein 5	2.46676	0.192957	65.8605	2.48e-05	0.000909568
7832	ENSG00000159388	BTG2	BTG anti-proliferation factor 2	-1.21414	5.80833	67.5465	2.47e-05	0.000909568
254065	ENSG00000165288	BRWD3	bromodomain and WD repeat domain containing 3	-1.17158	4.04771	65.3637	2.56e-05	0.000927797
56155	ENSG00000121101	TEX14	testis expressed 14, intercellular bridge forming factor	1.28671	4.4955	65.45	2.56e-05	0.000929027
91373	ENSG00000197355	UAP1L1	UDP-N-acetylglucosamine pyrophosphorylase 1 like 1	-1.02011	5.71575	64.8466	2.64e-05	0.000942273
4281	ENSG00000101871	MID1	midline 1	1.60752	1.12661	64.6518	2.67e-05	0.000942992
5453	ENSG00000185668	POU3F1	POU class 3 homeobox 1	4.9391	-0.671944	64.5714	2.68e-05	0.000943365
64859	ENSG00000173559	NABP1	nucleic acid binding protein 1	1.20759	4.76731	64.4595	2.7e-05	0.000947932
51313	ENSG00000164125	GASK1B	golgi associated kinase 1B	1.01491	3.33705	64.0712	2.76e-05	0.000962493
118672	ENSG00000179988	PSTK	phosphoseryl-tRNA kinase	1.43832	1.51227	63.8884	2.79e-05	0.000965527
3131	ENSG00000108924	HLF	HLF transcription factor, PAR bZIP family member	1.6308	1.29536	63.9846	2.78e-05	0.000965527
4744	ENSG00000100285	NEFH	neurofilament heavy chain	3.22156	-0.825651	63.8881	2.79e-05	0.000965527
653149	ENSG00000186086	NBPF6	NBPF member 6	2.3533	0.385529	63.9417	2.78e-05	0.000965527
84315	ENSG00000164077	MON1A	MON1 homolog A, secretory trafficking associated	1.0242	3.07204	63.5323	2.85e-05	0.00097505
100125556	ENSG00000291071	FAM86JP	family with sequence similarity 86, member A pseudogene	1.08855	2.56198	63.4103	2.87e-05	0.000980398
10385	ENSG00000124508	BTN2A2	butyrophilin subfamily 2 member A2	-1.2033	3.38594	63.2518	2.9e-05	0.000987991
65998	ENSG00000188070	ZFTA	zinc finger translocation associated	-1.47219	3.52283	62.984	2.95e-05	0.00100041
85446	ENSG00000136367	ZFHX2	zinc finger homeobox 2	-1.45697	3.49306	62.9209	2.96e-05	0.00100234
10507	ENSG00000187764	SEMA4D	semaphorin 4D	-1.11609	4.51305	62.3495	3.07e-05	0.00102244
6559	ENSG00000070915	SLC12A3	solute carrier family 12 member 3	3.36189	-0.710032	62.075	3.12e-05	0.00103407
56603	ENSG00000003137	CYP26B1	cytochrome P450 family 26 subfamily B member 1	2.34717	2.19292	62.7889	3.17e-05	0.00104535
8522	ENSG00000007237	GAS7	growth arrest specific 7	3.41641	-0.359	61.5236	3.23e-05	0.00106017
72	ENSG00000163017	ACTG2	actin gamma 2, smooth muscle	1.16033	3.20688	61.1868	3.3e-05	0.00107341
283212	ENSG00000149243	KLHL35	kelch like family member 35	1.16145	2.56107	60.8449	3.37e-05	0.00108405
4854	ENSG00000074181	NOTCH3	notch receptor 3	-1.02308	7.79853	60.7245	3.39e-05	0.00109033
155185	ENSG00000174945	AMZ1	archaelysin family metallopeptidase 1	1.15785	4.97789	60.268	3.52e-05	0.00112327
151887	ENSG00000091986	CCDC80	coiled-coil domain containing 80	1.44517	1.68562	60.0975	3.53e-05	0.00112432
79935	ENSG00000105219	CCNP	cyclin P	1.16671	1.85928	59.9095	3.58e-05	0.00112974
100101467	ENSG00000186814	ZSCAN30	zinc finger and SCAN domain containing 30	-1.06161	3.42673	59.859	3.59e-05	0.00113137
90525	ENSG00000138606	SHF	Src homology 2 domain containing F	-1.36977	2.19405	59.4173	3.69e-05	0.00115357
112849	ENSG00000126790	L3HYPDH	trans-L-3-hydroxyproline dehydratase	1.17911	3.8656	59.0606	3.78e-05	0.00117214
10622	ENSG00000113356	POLR3G	RNA polymerase III subunit G	1.08027	2.80934	58.9534	3.8e-05	0.00117451
9770	ENSG00000101265	RASSF2	Ras association domain family member 2	-1.20084	3.01511	58.7729	3.85e-05	0.0011776
192670	ENSG00000134698	AGO4	argonaute RISC component 4	-1.30441	4.12235	58.3902	3.98e-05	0.00120028
27063	ENSG00000148677	ANKRD1	ankyrin repeat domain 1	2.44842	-0.13621	58.0742	4.03e-05	0.00120732
9355	ENSG00000106689	LHX2	LIM homeobox 2	-1.33251	2.27707	57.7101	4.13e-05	0.00122631
8626	ENSG00000073282	TP63	tumor protein p63	1.64479	1.09263	57.5394	4.17e-05	0.00123192
9480	ENSG00000119547	ONECUT2	one cut homeobox 2	1.10118	4.89667	56.9762	4.33e-05	0.00126413
27333	ENSG00000173905	GOLIM4	golgi integral membrane protein 4	1.08899	4.87732	56.5619	4.45e-05	0.00127281
79575	ENSG00000127220	ABHD8	abhydrolase domain containing 8	-1.04287	2.73157	56.4847	4.48e-05	0.00127281
56944	ENSG00000116774	OLFML3	olfactomedin like 3	1.39211	4.66591	59.5364	4.65e-05	0.00131304
83888	ENSG00000137441	FGFBP2	fibroblast growth factor binding protein 2	4.61357	-1.20785	55.5603	4.77e-05	0.00133145
100129461	ENSG00000272142	LYRM4-AS1	LYRM4 antisense RNA 1	1.14715	2.05246	55.293	4.86e-05	0.00135151
9486	ENSG00000115526	CHST10	carbohydrate sulfotransferase 10	1.07866	3.47743	55.1763	4.89e-05	0.00135622
23548	ENSG00000113638	TTC33	tetratricopeptide repeat domain 33	-1.09878	3.6497	54.8118	5.02e-05	0.00138638
196993	ENSG00000225362	CT62	cancer/testis associated 62	1.25447	1.71771	54.6776	5.07e-05	0.00139464
83999	ENSG00000183762	KREMEN1	kringle containing transmembrane protein 1	-1.01268	4.29919	54.4303	5.15e-05	0.0014147
2899	ENSG00000163873	GRIK3	glutamate ionotropic receptor kainate type subunit 3	1.43277	1.3516	54.3747	5.17e-05	0.00141576
100499467	ENSG00000227036	LINC00673	long intergenic non-protein coding RNA 673	2.64112	-0.187745	54.2859	5.21e-05	0.00142014
6340	ENSG00000166828	SCNN1G	sodium channel epithelial 1 subunit gamma	1.99004	1.88166	54.1207	5.27e-05	0.00143008
85004	ENSG00000134533	RERG	RAS like estrogen regulated growth inhibitor	1.46682	3.72682	55.4158	5.33e-05	0.00144087
200316	ENSG00000128394	APOBEC3F	apolipoprotein B mRNA editing enzyme catalytic subunit 3F	-1.30715	1.48337	53.6668	5.44e-05	0.00146497
84541	ENSG00000163376	KBTBD8	kelch repeat and BTB domain containing 8	1.41925	2.77013	53.5372	5.49e-05	0.00147166
3221	ENSG00000198353	HOXC4	homeobox C4	-1.53635	1.03069	53.3905	5.54e-05	0.00148133
10420	ENSG00000070759	TESK2	testis associated actin remodelling kinase 2	-1.10562	2.91028	53.1371	5.64e-05	0.00150252
5168	ENSG00000136960	ENPP2	ectonucleotide pyrophosphatase/phosphodiesterase 2	3.97772	-1.09877	52.9209	5.73e-05	0.00151665
9076	ENSG00000163347	CLDN1	claudin 1	1.32616	3.24946	52.8517	5.76e-05	0.00151958
286336	ENSG00000126882	FAM78A	family with sequence similarity 78 member A	-1.23912	2.13763	52.6582	5.84e-05	0.00153286
6725	ENSG00000125508	SRMS	src-related kinase lacking C-terminal regulatory tyrosine and N-terminal myristylation sites	-1.17965	2.28535	52.6465	5.85e-05	0.00153286
19	ENSG00000165029	ABCA1	ATP binding cassette subfamily A member 1	-1.52342	3.17467	52.5396	5.93e-05	0.00154571
27292	ENSG00000086189	DIMT1	DIM1 rRNA methyltransferase and ribosome maturation factor	1.0139	4.8399	52.3563	5.97e-05	0.00154571
55638	ENSG00000147642	SYBU	syntabulin	1.94285	2.0493	52.3082	5.99e-05	0.00154571
93589	ENSG00000151062	CACNA2D4	calcium voltage-gated channel auxiliary subunit alpha2delta 4	1.42744	1.36135	52.3119	5.99e-05	0.00154571
341640	ENSG00000150893	FREM2	FRAS1 related extracellular matrix 2	1.21177	8.1798	55.5596	6e-05	0.00154651
7067	ENSG00000126351	THRA	thyroid hormone receptor alpha	-1.0083	3.7424	52.018	6.12e-05	0.00156877
64174	ENSG00000167261	DPEP2	dipeptidase 2	4.02692	-0.706263	51.9402	6.15e-05	0.00157534
10761	ENSG00000170965	PLAC1	placenta enriched 1	2.14711	0.413181	51.4169	6.39e-05	0.00162002
11189	ENSG00000159409	CELF3	CUGBP Elav-like family member 3	-1.2546	1.75824	51.1667	6.51e-05	0.00164633
6387	ENSG00000107562	CXCL12	C-X-C motif chemokine ligand 12	2.5635	5.97629	77.9072	6.54e-05	0.00164822
9381	ENSG00000115155	OTOF	otoferlin	5.53155	-0.741571	50.7607	6.71e-05	0.00166652
114770	ENSG00000161031	PGLYRP2	peptidoglycan recognition protein 2	2.9275	-0.773756	50.1386	7.02e-05	0.00172836
4889	ENSG00000164129	NPY5R	neuropeptide Y receptor Y5	1.37294	2.64292	49.8618	7.17e-05	0.00175968
5570	ENSG00000135549	PKIB	cAMP-dependent protein kinase inhibitor beta	1.17457	6.27652	53.1124	7.36e-05	0.00179866
91893	ENSG00000255561	FDXACB1	ferredoxin-fold anticodon binding domain containing 1	1.06064	2.30081	49.0896	7.6e-05	0.00184241
126567	ENSG00000183186	C2CD4C	C2 calcium dependent domain containing 4C	-1.3354	2.32297	48.8054	7.77e-05	0.00187088
81031	ENSG00000197496	SLC2A10	solute carrier family 2 member 10	-1.11618	5.90772	51.3753	7.84e-05	0.00188202
23220	ENSG00000110042	DTX4	deltex E3 ubiquitin ligase 4	-1.46162	3.13485	48.6105	7.94e-05	0.00189088
50604	ENSG00000162891	IL20	interleukin 20	3.01022	-1.22898	48.2634	8.1e-05	0.00191805
284161	ENSG00000153982	GDPD1	glycerophosphodiester phosphodiesterase domain containing 1	-1.69314	2.25594	47.851	8.36e-05	0.00196717
2675	ENSG00000168546	GFRA2	GDNF family receptor alpha 2	5.46316	-1.98344	47.6961	8.47e-05	0.00198576
11037	ENSG00000243244	STON1	stonin 1	-1.89032	2.5736	48.9799	8.61e-05	0.00201507
392617	ENSG00000225968	ELFN1	extracellular leucine rich repeat and fibronectin type III domain containing 1	-1.44973	2.1758	46.946	8.98e-05	0.00208141
79689	ENSG00000127954	STEAP4	STEAP4 metalloreductase	1.52638	0.547238	46.4481	9.34e-05	0.00213815
744	ENSG00000066382	MPPED2	metallophosphoesterase domain containing 2	2.1243	1.03426	46.3699	9.4e-05	0.00214234
83394	ENSG00000091622	PITPNM3	PITPNM family member 3	-1.37898	2.01385	46.2789	9.47e-05	0.00214964
56342	ENSG00000130810	PPAN	peter pan homolog	1.05234	2.28691	46.0629	9.64e-05	0.00217045
145741	ENSG00000198535	C2CD4A	C2 calcium dependent domain containing 4A	1.50584	0.955183	45.8903	9.77e-05	0.0021891
25849	ENSG00000169116	PARM1	prostate androgen-regulated mucin-like protein 1	1.00279	2.33235	44.7468	0.000107274	0.00232176
26056	ENSG00000135631	RAB11FIP5	RAB11 family interacting protein 5	-1.29826	2.93444	44.7884	0.000106907	0.00232176
4857	ENSG00000139910	NOVA1	NOVA alternative splicing regulator 1	-1.19782	2.57531	44.7612	0.000107148	0.00232176
153769	ENSG00000156463	SH3RF2	SH3 domain containing ring finger 2	1.64167	1.01763	43.3294	0.000120778	0.00252298
4355	ENSG00000108852	MPP2	MAGUK p55 scaffold protein 2	-1.03553	3.09267	43.2421	0.000121675	0.00253346
1592	ENSG00000095596	CYP26A1	cytochrome P450 family 26 subfamily A member 1	1.87029	-0.0781962	42.9877	0.000124341	0.00256566
401265	ENSG00000124743	KLHL31	kelch like family member 31	1.63886	1.26928	42.9838	0.000124382	0.00256566
638	ENSG00000100290	BIK	BCL2 interacting killer	-1.1586	3.3283	42.646	0.000128034	0.00262156
2020	ENSG00000164778	EN2	engrailed homeobox 2	1.13405	2.07284	42.2305	0.000132709	0.00269842
101669762	ENSG00000281406	BLACAT1	BLACAT1 overlapping LEMD1 locus	-2.20016	0.122569	42.0815	0.000134437	0.0027131
255324	ENSG00000182585	EPGN	epithelial mitogen	3.02721	-1.29362	42.0063	0.000135319	0.00272
7091	ENSG00000106829	TLE4	TLE family member 4, transcriptional corepressor	1.86693	0.264787	41.9779	0.000135655	0.00272052
8693	ENSG00000257594	GALNT4	polypeptide N-acetylgalactosaminyltransferase 4	1.5664	1.05317	41.8719	0.000136914	0.00273641
57795	ENSG00000198797	BRINP2	BMP/retinoic acid inducible neural specific 2	1.85953	2.73523	44.0049	0.000142648	0.00280319
85027	ENSG00000256235	SMIM3	small integral membrane protein 3	-1.31554	1.94989	41.2806	0.000144213	0.0028276
256309	ENSG00000168491	CCDC110	coiled-coil domain containing 110	1.86531	0.736637	40.9765	0.000148152	0.00287596
23026	ENSG00000041515	MYO16	myosin XVI	1.45436	1.65038	40.648	0.000152558	0.00294521
401236	ENSG00000230873	STMND1	stathmin domain containing 1	3.47816	-1.67927	40.3817	0.00015625	0.00299576
8140	ENSG00000103257	SLC7A5	solute carrier family 7 member 5	1.07179	10.4333	40.4427	0.00015637	0.00299576
6330	ENSG00000177098	SCN4B	sodium voltage-gated channel beta subunit 4	2.44115	-1.29932	40.3284	0.000157002	0.00300209
85463	ENSG00000149289	ZC3H12C	zinc finger CCCH-type containing 12C	1.23784	1.51816	40.2109	0.000158675	0.00302671
22849	ENSG00000107864	CPEB3	cytoplasmic polyadenylation element binding protein 3	-1.07677	2.44197	40.1239	0.000159927	0.0030407
84626	ENSG00000133619	KRBA1	KRAB-A domain containing 1	-1.13811	3.52137	40.0746	0.000160643	0.00305049
165140	ENSG00000162881	OXER1	oxoeicosanoid receptor 1	3.41287	-1.01322	40.0376	0.000161182	0.00305135
1490	ENSG00000118523	CCN2	cellular communication network factor 2	1.32062	1.90848	39.3336	0.000171889	0.00320907
4987	ENSG00000125510	OPRL1	opioid related nociceptin receptor 1	-1.83591	-0.500102	39.2814	0.000172716	0.00321088
2299	ENSG00000168269	FOXI1	forkhead box I1	1.99914	1.91272	39.7436	0.000177427	0.00327764
654429	ENSG00000166159	LRTM2	leucine rich repeats and transmembrane domains 2	2.0624	-0.394686	38.8416	0.000179893	0.00330002
3569	ENSG00000136244	IL6	interleukin 6	1.2319	1.3075	38.4198	0.000187123	0.00339209
399473	ENSG00000188766	SPRED3	sprouty related EVH1 domain containing 3	-1.84986	1.52036	38.2853	0.000189505	0.0034076
64101	ENSG00000128594	LRRC4	leucine rich repeat containing 4	1.43654	0.264714	37.9714	0.000195207	0.00349487
139065	ENSG00000179542	SLITRK4	SLIT and NTRK like family member 4	1.2521	1.15736	37.4603	0.000204951	0.00361504
4915	ENSG00000148053	NTRK2	neurotrophic receptor tyrosine kinase 2	4.29541	-0.798855	37.1484	0.000211195	0.00369892
3572	ENSG00000134352	IL6ST	interleukin 6 cytokine family signal transducer	1.42096	5.75162	44.4921	0.000214672	0.00374142
8817	ENSG00000156427	FGF18	fibroblast growth factor 18	1.4625	1.55354	36.9588	0.000215104	0.00374524
3714	ENSG00000184916	JAG2	jagged canonical Notch ligand 2	-1.08898	5.00787	38.9364	0.000215808	0.00375237
8456	ENSG00000109101	FOXN1	forkhead box N1	2.22509	0.0864553	36.9187	0.000215941	0.00375237
4248	ENSG00000128268	MGAT3	beta-1,4-mannosyl-glycoprotein 4-beta-N-acetylglucosaminyltransferase	1.42158	1.29415	36.5417	0.00022402	0.00385842
100506637	ENSG00000224424	PRKAR2A-AS1	PRKAR2A antisense RNA 1	-1.39746	0.847485	36.4867	0.000225231	0.00387005
130574	ENSG00000187123	LYPD6	LY6/PLAUR domain containing 6	1.06845	6.31484	39.1225	0.00023767	0.00400175
6926	ENSG00000135111	TBX3	T-box transcription factor 3	-1.05754	3.06648	35.9249	0.000238061	0.00400175
7054	ENSG00000180176	TH	tyrosine hydroxylase	1.24079	1.91244	35.8547	0.000239725	0.00401859
374907	ENSG00000177191	B3GNT8	UDP-GlcNAc:betaGal beta-1,3-N-acetylglucosaminyltransferase 8	-1.57308	0.80163	35.4428	0.000249793	0.00413996
5990	ENSG00000087903	RFX2	regulatory factor X2	-1.08608	2.01342	35.4073	0.000250685	0.00414303
9953	ENSG00000125430	HS3ST3B1	heparan sulfate-glucosamine 3-sulfotransferase 3B1	1.84455	0.375472	35.3468	0.000252214	0.00416437
55065	ENSG00000132517	SLC52A1	solute carrier family 52 member 1	-1.19087	1.79542	35.2583	0.000254472	0.00419378
139324	ENSG00000165259	HDX	highly divergent homeobox	-1.25465	0.924847	34.8444	0.000265365	0.00431979
338382	ENSG00000276600	RAB7B	RAB7B, member RAS oncogene family	2.66293	-1.72291	34.8281	0.000265807	0.00431979
222950	ENSG00000166924	NYAP1	neuronal tyrosine phosphorylated phosphoinositide-3-kinase adaptor 1	-2.24504	-0.568889	34.5967	0.000272161	0.00439864
388389	ENSG00000167131	CCDC103	coiled-coil domain containing 103	-1.18178	1.84054	34.5363	0.000273849	0.00441374
23541	ENSG00000100003	SEC14L2	SEC14 like lipid binding 2	1.65367	2.84894	36.3135	0.000282416	0.00450635
51195	ENSG00000108352	RAPGEFL1	Rap guanine nucleotide exchange factor like 1	1.511	4.81868	40.9563	0.000282021	0.00450635
57705	ENSG00000128815	WDFY4	WDFY family member 4	1.91785	-0.267686	34.1942	0.000283665	0.00452216
933	ENSG00000012124	CD22	CD22 molecule	1.79782	1.1621	34.086	0.000286858	0.00454831
5027	ENSG00000089041	P2RX7	purinergic receptor P2X 7	2.18816	0.0441796	34.0235	0.000288725	0.00456966
54898	ENSG00000197977	ELOVL2	ELOVL fatty acid elongase 2	1.5865	1.28885	33.9863	0.000289841	0.00458319
2925	ENSG00000126010	GRPR	gastrin releasing peptide receptor	2.39563	-1.34359	33.5723	0.000302642	0.00469684
2731	ENSG00000178445	GLDC	glycine decarboxylase	1.07863	1.42163	33.5077	0.000304703	0.00472049
57476	ENSG00000023171	GRAMD1B	GRAM domain containing 1B	1.69577	0.566722	33.2462	0.000313219	0.00481842
645332	ENSG00000290994	FAM86C2P	family with sequence similarity 86, member A pseudogene	1.0405	2.97721	33.0406	0.000320122	0.00489035
56892	ENSG00000176907	TCIM	transcriptional and immune response regulator	1.0596	1.33849	32.5226	0.000338364	0.00510467
387856	ENSG00000177875	CCDC184	coiled-coil domain containing 184	-1.81438	-0.808428	32.407	0.000342609	0.00515322
55964	ENSG00000100167	SEPTIN3	septin 3	-1.03581	2.18976	32.3292	0.000345503	0.00517459
153364	ENSG00000176055	MBLAC2	metallo-beta-lactamase domain containing 2	1.08246	3.85439	32.8405	0.000346793	0.00518625
379	ENSG00000175906	ARL4D	ADP ribosylation factor like GTPase 4D	-1.36921	0.611726	32.1356	0.000352833	0.00522205
3354	ENSG00000168830	HTR1E	5-hydroxytryptamine receptor 1E	1.49904	1.54201	32.0889	0.000354631	0.00523543
92922	ENSG00000135736	CCDC102A	coiled-coil domain containing 102A	-1.02406	2.24146	31.9222	0.000361138	0.00530418
79674	ENSG00000197415	VEPH1	ventricular zone expressed PH domain containing 1	1.40373	2.75917	32.3224	0.000364212	0.00532762
140	ENSG00000282608	ADORA3	adenosine A3 receptor	3.21989	-1.8902	31.4005	0.000382478	0.00551038
241	ENSG00000132965	ALOX5AP	arachidonate 5-lipoxygenase activating protein	2.57463	-1.43606	31.2884	0.000387262	0.00555381
6591	ENSG00000019549	SNAI2	snail family transcriptional repressor 2	2.22656	-0.127189	31.2734	0.000387909	0.00555403
200407	ENSG00000175874	CREG2	cellular repressor of E1A stimulated genes 2	1.05727	1.88574	30.9658	0.000401454	0.00568696
7786	ENSG00000139625	MAP3K12	mitogen-activated protein kinase kinase kinase 12	-1.3551	5.01325	36.2136	0.000401726	0.00568696
6764	ENSG00000166444	DENND2B	DENN domain containing 2B	-1.01903	2.24231	30.6963	0.000413804	0.00579722
1820	ENSG00000116017	ARID3A	AT-rich interaction domain 3A	-1.14776	4.98337	33.592	0.000414627	0.00580412
57529	ENSG00000243978	RTL9	retrotransposon Gag like 9	1.70034	-0.320267	30.6483	0.000416053	0.00581482
4477	ENSG00000263639	MSMB	microseminoprotein beta	1.06464	1.43179	30.4278	0.000426575	0.00588693
3400	ENSG00000172201	ID4	inhibitor of DNA binding 4	1.07405	1.69904	30.3682	0.000429478	0.00590381
85002	ENSG00000186523	FAM86B1	family with sequence similarity 86 member B1	1.18902	1.78742	30.2644	0.000434588	0.00595077
119587	ENSG00000121898	CPXM2	carboxypeptidase X, M14 family member 2	1.11968	1.26987	30.2093	0.000437329	0.00597434
10098	ENSG00000168785	TSPAN5	tetraspanin 5	1.20083	2.71255	30.1429	0.000440665	0.00600383
1103	ENSG00000070748	CHAT	choline O-acetyltransferase	6.57303	-2.64955	41.2712	0.000440971	0.00600383
286042	ENSG00000173295	FAM86B3P	family with sequence similarity 86, member A pseudogene	1.60821	2.62235	31.7032	0.000441592	0.00600383
340533	ENSG00000050030	NEXMIF	neurite extension and migration factor	-1.58988	0.340679	30.1059	0.000442537	0.00600383
57524	ENSG00000167971	CASKIN1	CASK interacting protein 1	-1.4794	2.95497	31.7673	0.000442244	0.00600383
333929	ENSG00000185669	SNAI3	snail family transcriptional repressor 3	-1.13575	1.20854	29.9938	0.000448268	0.00605317
79805	ENSG00000143494	VASH2	vasohibin 2	-1.1541	1.6507	29.9039	0.00045293	0.00608805
283248	ENSG00000167771	RCOR2	REST corepressor 2	-1.7388	3.11596	33.7116	0.000454314	0.00609732
84969	ENSG00000124191	TOX2	TOX high mobility group box family member 2	-1.0223	1.16908	29.8548	0.000455499	0.00610508
2781	ENSG00000128266	GNAZ	G protein subunit alpha z	-1.01568	2.48714	29.8377	0.0004564	0.00610665
3815	ENSG00000157404	KIT	KIT proto-oncogene, receptor tyrosine kinase	2.50624	-0.358102	29.6713	0.00046527	0.00618763
102606465	ENSG00000233184	DPH5-DT	DPH5 divergent transcript	1.08493	1.76825	29.4991	0.000474673	0.00626951
64283	ENSG00000214944	ARHGEF28	Rho guanine nucleotide exchange factor 28	1.15146	3.59463	30.4438	0.000475113	0.00626951
282996	ENSG00000203867	RBM20	RNA binding motif protein 20	1.61845	-0.617202	29.4203	0.000479054	0.00630887
27290	ENSG00000122711	SPINK4	serine peptidase inhibitor Kazal type 4	1.68844	-0.145996	29.3644	0.00048219	0.0063454
91584	ENSG00000221866	PLXNA4	plexin A4	1.62326	3.99135	34.9643	0.000486687	0.00638545
79827	ENSG00000166250	CLMP	CXADR like membrane protein	2.60433	-0.918834	28.9734	0.000504867	0.00655692
9214	ENSG00000162894	FCMR	Fc mu receptor	2.45205	0.106865	28.927	0.000507647	0.00657756
112714	ENSG00000152086	TUBA3E	tubulin alpha 3e	2.86594	0.16701	29.3144	0.00051185	0.00660366
10500	ENSG00000143434	SEMA6C	semaphorin 6C	-1.24484	1.09036	28.7646	0.000517517	0.00665574
5271	ENSG00000166401	SERPINB8	serpin family B member 8	1.41568	0.882202	28.7385	0.000519123	0.00666664
55214	ENSG00000090530	P3H2	prolyl 3-hydroxylase 2	2.32915	-1.73286	28.7305	0.000519618	0.00666811
150	ENSG00000150594	ADRA2A	adrenoceptor alpha 2A	2.44914	-1.30921	28.5741	0.000529398	0.00675505
161931	ENSG00000140955	ADAD2	adenosine deaminase domain containing 2	1.7889	-0.39572	28.5729	0.000529469	0.00675505
5032	ENSG00000244165	P2RY11	purinergic receptor P2Y11	1.10133	1.28723	28.4115	0.000539804	0.00686634
81569	ENSG00000117148	ACTL8	actin like 8	2.19175	-0.432468	28.2367	0.000551273	0.00697749
1943	ENSG00000099617	EFNA2	ephrin A2	-1.66622	0.0728596	28.1966	0.000553947	0.0069912
11063	ENSG00000039600	SOX30	SRY-box transcription factor 30	2.45187	-1.74394	27.7039	0.000588141	0.00731383
345557	ENSG00000182836	PLCXD3	phosphatidylinositol specific phospholipase C X domain containing 3	1.1677	1.59088	27.7059	0.000587997	0.00731383
54064	ENSG00000230978	LINC00160	long intergenic non-protein coding RNA 160	3.56127	-1.61867	27.579	0.000597223	0.00737317
100038246	ENSG00000236311	TLX1NB	TLX1 neighbor	-1.66979	-0.515867	27.5285	0.000600937	0.00739873
146395	ENSG00000169181	GSG1L	GSG1 like	1.34055	0.855407	27.5342	0.000600515	0.00739873
57624	ENSG00000144460	NYAP2	neuronal tyrosine-phosphorylated phosphoinositide-3-kinase adaptor 2	1.3761	0.829969	27.5073	0.000602511	0.00740722
80183	ENSG00000102445	RUBCNL	rubicon like autophagy enhancer	2.83793	-1.57261	27.4949	0.000603433	0.00740819
9783	ENSG00000117016	RIMS3	regulating synaptic membrane exocytosis 3	-1.32922	2.24654	27.4308	0.000608219	0.00744612
4776	ENSG00000100968	NFATC4	nuclear factor of activated T cells 4	-1.35754	3.83853	30.3953	0.000615573	0.00750338
53637	ENSG00000180739	S1PR5	sphingosine-1-phosphate receptor 5	-1.58379	-0.143001	27.3124	0.000617181	0.00750875
57091	ENSG00000087589	CASS4	Cas scaffold protein family member 4	1.33026	0.820582	27.0008	0.000641569	0.00768832
10633	ENSG00000100276	RASL10A	RAS like family 10 member A	2.18166	-0.0241585	26.804	0.000657582	0.00782684
646862	ENSG00000269855	RNF225	ring finger protein 225	-1.40933	-0.0692898	26.7898	0.000658754	0.00783547
5101	ENSG00000184226	PCDH9	protocadherin 9	1.22102	1.56442	26.7593	0.000661291	0.00786032
731220	ENSG00000196460	RFX8	regulatory factor X8	2.15951	-1.2806	26.5978	0.00067489	0.0079627
10382	ENSG00000104833	TUBB4A	tubulin beta 4A class IVa	-1.28378	0.815461	26.5534	0.00067869	0.0079968
9473	ENSG00000130775	THEMIS2	thymocyte selection associated family member 2	-1.94648	0.600302	26.4065	0.000691461	0.00811462
140862	ENSG00000101230	ISM1	isthmin 1	2.00495	0.136709	26.1624	0.000713333	0.00832127
85397	ENSG00000135824	RGS8	regulator of G protein signaling 8	3.22254	-1.68428	26.1128	0.00071788	0.00835213
54839	ENSG00000137821	LRRC49	leucine rich repeat containing 49	1.04058	0.823781	26.0081	0.000727595	0.00842609
6578	ENSG00000174640	SLCO2A1	solute carrier organic anion transporter family member 2A1	2.57969	-1.33986	25.6856	0.000758564	0.00869873
9148	ENSG00000107954	NEURL1	neuralized E3 ubiquitin protein ligase 1	-1.0243	1.259	25.6856	0.000758562	0.00869873
283358	ENSG00000139044	B4GALNT3	beta-1,4-N-acetyl-galactosaminyltransferase 3	1.90749	-1.23866	25.6059	0.000766467	0.00876646
7042	ENSG00000092969	TGFB2	transforming growth factor beta 2	1.52215	3.36205	28.7764	0.000767285	0.00876718
26166	ENSG00000132554	RGS22	regulator of G protein signaling 22	1.85995	-0.312129	25.4855	0.000778597	0.00884188
90993	ENSG00000157613	CREB3L1	cAMP responsive element binding protein 3 like 1	-1.28376	2.92311	26.2542	0.000787815	0.00891642
8900	ENSG00000133101	CCNA1	cyclin A1	1.18867	0.661273	25.3644	0.00079104	0.00894272
9294	ENSG00000267534	S1PR2	sphingosine-1-phosphate receptor 2	-1.28984	2.13543	25.3305	0.000794565	0.00896526
84665	ENSG00000138347	MYPN	myopalladin	3.63307	-2.35844	25.3118	0.000796525	0.00898052
29800	ENSG00000159714	ZDHHC1	zinc finger DHHC-type containing 1	-1.11785	1.05387	25.1872	0.000809689	0.00907182
26031	ENSG00000070882	OSBPL3	oxysterol binding protein like 3	1.42168	0.493185	25.0786	0.000821387	0.00919116
1734	ENSG00000211448	DIO2	iodothyronine deiodinase 2	2.02653	-1.15391	25.0564	0.000823807	0.00920652
153	ENSG00000043591	ADRB1	adrenoceptor beta 1	1.14943	0.717958	24.9298	0.000837763	0.00931333
55824	ENSG00000076641	PAG1	phosphoprotein membrane anchor with glycosphingolipid microdomains 1	1.42963	0.354073	24.7535	0.000857683	0.00947426
124590	ENSG00000182040	USH1G	USH1 protein network component sans	-1.6743	0.16779	24.6534	0.000869248	0.00954656
8470	ENSG00000154556	SORBS2	sorbin and SH3 domain containing 2	3.13804	-2.39232	24.3022	0.000911392	0.00991414
81493	ENSG00000162520	SYNC	syncoilin, intermediate filament protein	-1.75089	-1.0298	23.78	0.00097882	0.01045
93010	ENSG00000156966	B3GNT7	UDP-GlcNAc:betaGal beta-1,3-N-acetylglucosaminyltransferase 7	-1.66435	0.312044	23.6939	0.000990523	0.01054
388115	ENSG00000188549	CCDC9B	coiled-coil domain containing 9B	-1.32865	1.6905	23.6128	0.00100169	0.0106266
3761	ENSG00000168135	KCNJ4	potassium inwardly rectifying channel subfamily J member 4	-1.6243	0.163794	23.5786	0.00100646	0.0106707
639	ENSG00000057657	PRDM1	PR/SET domain 1	2.24653	-0.520649	23.5517	0.00101023	0.0106785
8204	ENSG00000180530	NRIP1	nuclear receptor interacting protein 1	1.06048	7.11439	27.0514	0.0010518	0.0109858
100287902	ENSG00000223776	LGALS8-AS1	LGALS8 antisense RNA 1	-1.50772	0.876304	22.9688	0.00109622	0.0113218
152831	ENSG00000134962	KLB	klotho beta	1.21204	1.60309	22.8656	0.00111238	0.0114578
2769	ENSG00000060558	GNA15	G protein subunit alpha 15	-1.0333	0.748798	22.7292	0.00113417	0.0115979
5745	ENSG00000160801	PTH1R	parathyroid hormone 1 receptor	1.65558	-0.419155	22.3714	0.00119393	0.0120761
116362	ENSG00000162444	RBP7	retinol binding protein 7	1.75939	-0.115397	22.3297	0.00120114	0.0120977
57464	ENSG00000128578	STRIP2	striatin interacting protein 2	1.55967	-0.42214	22.2548	0.00121423	0.0121756
57526	ENSG00000165194	PCDH19	protocadherin 19	1.86471	0.22032	22.0645	0.0012483	0.012425
134285	ENSG00000157111	TMEM171	transmembrane protein 171	1.4361	-0.378309	21.8172	0.00129434	0.0127604
84446	ENSG00000160469	BRSK1	BR serine/threonine kinase 1	-1.06041	2.73469	21.7854	0.00130545	0.0128339
51054	ENSG00000134297	PLEKHA8P1	pleckstrin homology domain containing A8 pseudogene 1	1.01174	2.54465	21.7058	0.00131577	0.0128934
7225	ENSG00000137672	TRPC6	transient receptor potential cation channel subfamily C member 6	2.55448	-1.00319	21.6551	0.00132566	0.0129673
79570	ENSG00000084628	NKAIN1	sodium/potassium transporting ATPase interacting 1	1.3093	0.885652	21.4401	0.00136867	0.0132771
123	ENSG00000147872	PLIN2	perilipin 2	-1.37956	3.64648	24.1895	0.00139928	0.0134847
80339	ENSG00000100344	PNPLA3	patatin like phospholipase domain containing 3	1.63783	-0.884953	21.2823	0.00140131	0.01349
23092	ENSG00000145819	ARHGAP26	Rho GTPase activating protein 26	1.44245	-0.132985	21.2039	0.00141789	0.0135895
100507437	ENSG00000251602	MTA1-DT	MTA1 divergent transcript	-1.16128	0.815578	21.1095	0.00143819	0.0137177
11219	ENSG00000183479	TREX2	three prime repair exonuclease 2	1.24265	0.504389	21.0605	0.00144885	0.0137959
596	ENSG00000171791	BCL2	BCL2 apoptosis regulator	1.08846	4.9386	23.7689	0.00145732	0.013839
5596	ENSG00000141639	MAPK4	mitogen-activated protein kinase 4	1.1996	-0.0814431	20.9575	0.00147161	0.0138921
8828	ENSG00000118257	NRP2	neuropilin 2	2.45064	-1.74088	20.7729	0.00151352	0.0142004
89766	ENSG00000177398	UMODL1	uromodulin like 1	1.50032	-0.0235449	20.7082	0.00152853	0.0142685
84675	ENSG00000147573	TRIM55	tripartite motif containing 55	1.29175	1.65578	20.458	0.00158842	0.0147025
22983	ENSG00000105613	MAST1	microtubule associated serine/threonine kinase 1	-1.37936	2.25655	21.0262	0.001611	0.0148645
2645	ENSG00000106633	GCK	glucokinase	2.21628	-1.12082	20.3673	0.00161085	0.0148645
163154	ENSG00000212123	PRR22	proline rich 22	1.19318	1.21196	20.314	0.00162421	0.014955
145781	ENSG00000137878	GCOM1	GCOM1, MYZAP-POLR2M combined locus	1.40157	-0.34435	20.3086	0.00162557	0.0149597
8857	ENSG00000275395	FCGBP	Fc gamma binding protein	1.07321	0.239132	20.2296	0.00164565	0.015097
54858	ENSG00000130517	PGPEP1	pyroglutamyl-peptidase I	-1.21673	5.09493	23.6201	0.00166586	0.0152505
56034	ENSG00000145431	PDGFC	platelet derived growth factor C	-1.13196	0.77501	19.8843	0.00173706	0.0156143
79748	ENSG00000140506	LMAN1L	lectin, mannose binding 1 like	3.28317	-1.09952	19.8985	0.00173937	0.0156143
57216	ENSG00000162738	VANGL2	VANGL planar cell polarity protein 2	-1.17056	1.80179	19.7368	0.001778	0.01588
4051	ENSG00000186529	CYP4F3	cytochrome P450 family 4 subfamily F member 3	1.90197	-1.61787	19.607	0.00181503	0.0161287
114783	ENSG00000142235	LMTK3	lemur tyrosine kinase 3	-1.01936	3.98416	20.8544	0.00182628	0.016199
101927992	ENSG00000244541	LINC01213	long intergenic non-protein coding RNA 1213	1.04918	1.37871	19.3903	0.00187898	0.0165298
80128	ENSG00000163462	TRIM46	tripartite motif containing 46	-1.2182	2.0594	19.3998	0.00188268	0.0165395
389332	ENSG00000271824	SMIM32	small integral membrane protein 32	2.67796	-0.553905	19.392	0.00188505	0.0165417
147463	ENSG00000154065	ANKRD29	ankyrin repeat domain 29	1.13269	0.494098	19.3077	0.0019041	0.016659
2849	ENSG00000154478	GPR26	G protein-coupled receptor 26	2.5717	-2.36282	19.1573	0.0019509	0.0169838
84627	ENSG00000225614	ZNF469	zinc finger protein 469	-1.3898	1.8185	19.345	0.0019661	0.0170738
83851	ENSG00000139973	SYT16	synaptotagmin 16	1.84167	-1.5946	19.0296	0.00199174	0.0172369
3783	ENSG00000104783	KCNN4	potassium calcium-activated channel subfamily N member 4	-1.10727	3.97176	20.796	0.00201061	0.0173319
4094	ENSG00000178573	MAF	MAF bZIP transcription factor	1.4675	1.31139	18.9744	0.0020166	0.0173618
7980	ENSG00000105825	TFPI2	tissue factor pathway inhibitor 2	1.29236	-0.0561197	18.8734	0.00204315	0.0175435
9388	ENSG00000101670	LIPG	lipase G, endothelial type	2.52988	-1.20829	18.861	0.0020473	0.0175706
387496	ENSG00000122035	RASL11A	RAS like family 11 member A	1.41203	0.6827	18.827	0.00205873	0.0176171
79927	ENSG00000197245	FAM110D	family with sequence similarity 110 member D	-2.54064	-1.57848	18.6503	0.00211943	0.0180018
55504	ENSG00000127863	TNFRSF19	TNF receptor superfamily member 19	2.23714	-1.60841	18.6289	0.00212696	0.0180279
640	ENSG00000136573	BLK	BLK proto-oncogene, Src family tyrosine kinase	2.98284	-1.75606	18.6163	0.00213137	0.0180279
100507043	ENSG00000250366	TUNAR	TCL1 upstream neural differentiation-associated RNA	5.74794	-3.21919	23.4423	0.00215434	0.0181565
25891	ENSG00000149090	PAMR1	peptidase domain containing associated with muscle regeneration 1	1.72383	-1.20433	18.5288	0.00216247	0.0182033
51305	ENSG00000169427	KCNK9	potassium two pore domain channel subfamily K member 9	2.4687	-2.45156	18.5015	0.00217229	0.0182597
4858	ENSG00000104967	NOVA2	NOVA alternative splicing regulator 2	-2.21909	-0.48768	18.2922	0.00224943	0.018717
54626	ENSG00000069812	HES2	hes family bHLH transcription factor 2	-1.22706	3.25794	19.716	0.00226564	0.0188063
64753	ENSG00000128596	CCDC136	coiled-coil domain containing 136	-1.58872	1.85147	19.1789	0.00227028	0.0188222
2213	ENSG00000072694	FCGR2B	Fc gamma receptor IIb	2.48343	-2.09836	18.2217	0.00227615	0.0188531
6295	ENSG00000130561	SAG	S-antigen visual arrestin	3.20914	-2.65276	18.1828	0.00229105	0.0189408
3763	ENSG00000157542	KCNJ6	potassium inwardly rectifying channel subfamily J member 6	3.05417	-2.00454	18.174	0.00229445	0.0189511
126536	ENSG00000205396	LINC00661	long intergenic non-protein coding RNA 661	3.75566	-2.67513	18.1632	0.00229863	0.0189678
130813	ENSG00000150873	C2orf50	chromosome 2 open reading frame 50	1.02895	0.777651	18.0716	0.00233438	0.0191727
399671	ENSG00000187105	HEATR4	HEAT repeat containing 4	1.02093	0.505626	17.9236	0.00239361	0.0195313
80201	ENSG00000156510	HKDC1	hexokinase domain containing 1	4.00872	-3.05578	17.8835	0.00241001	0.0196195
7471	ENSG00000125084	WNT1	Wnt family member 1	1.98062	-1.8177	17.8459	0.00242545	0.0197138
51557	ENSG00000146166	LGSN	lengsin, lens protein with glutamine synthetase domain	1.48606	-0.193419	17.8271	0.00243326	0.019763
80704	ENSG00000135917	SLC19A3	solute carrier family 19 member 3	1.59177	-0.822093	17.8051	0.00244239	0.0198097
27239	ENSG00000250510	GPR162	G protein-coupled receptor 162	-1.67302	-1.01426	17.753	0.00246421	0.0199151
219623	ENSG00000196932	TMEM26	transmembrane protein 26	1.37096	0.488141	17.6882	0.0024917	0.0200892
6345	ENSG00000185739	SRL	sarcalumenin	1.56614	-1.00651	17.639	0.00251286	0.0202033
79933	ENSG00000166317	SYNPO2L	synaptopodin 2 like	2.05717	-1.41342	17.5929	0.00253282	0.0203281
407975	ENSG00000215417	MIR17HG	miR-17-92a-1 cluster host gene	1.57385	1.07308	17.6352	0.00253549	0.0203395
9048	ENSG00000117407	ARTN	artemin	1.52809	0.860015	17.5679	0.00254377	0.020378
197196	ENSG00000179219	LINC00311	long intergenic non-protein coding RNA 311	2.35364	-1.22235	17.5154	0.00256689	0.0204857
376497	ENSG00000130304	SLC27A1	solute carrier family 27 member 1	-1.01091	2.92026	17.7466	0.00260106	0.020658
115330	ENSG00000164849	GPR146	G protein-coupled receptor 146	-1.1275	0.794188	17.4235	0.00260801	0.0206757
64093	ENSG00000198732	SMOC1	SPARC related modular calcium binding 1	1.54141	-1.11231	17.4271	0.00260641	0.0206757
3170	ENSG00000125798	FOXA2	forkhead box A2	2.02967	-2.05804	17.2893	0.00266955	0.0210205
100874055	ENSG00000224177	LINC00570	long intergenic non-protein coding RNA 570	3.02564	-2.50327	17.2498	0.00268797	0.0210814
6383	ENSG00000169439	SDC2	syndecan 2	1.0018	2.83665	17.3441	0.00273687	0.0214031
101929748	ENSG00000288062	LOC101929748	uncharacterized LOC101929748	2.17294	-1.15041	17.1126	0.0027533	0.0214883
155465	ENSG00000173467	AGR3	anterior gradient 3, protein disulphide isomerase family member	2.40526	-2.48673	16.8309	0.00289366	0.0223257
147111	ENSG00000185269	NOTUM	notum, palmitoleoyl-protein carboxylesterase	-1.21619	-0.615872	16.7809	0.00291951	0.0224119
253827	ENSG00000174099	MSRB3	methionine sulfoxide reductase B3	2.02055	-1.44338	16.7737	0.00292322	0.0224258
5145	ENSG00000132915	PDE6A	phosphodiesterase 6A	1.42089	0.197126	16.6632	0.00298144	0.0226646
9536	ENSG00000148344	PTGES	prostaglandin E synthase	1.19753	3.87119	18.8786	0.00298596	0.0226793
51279	ENSG00000139178	C1RL	complement C1r subcomponent like	-1.62456	-0.252903	16.5855	0.00302318	0.0228829
27143	ENSG00000107719	PALD1	phosphatase domain containing paladin 1	-1.08124	-0.0300132	16.4376	0.00310473	0.0233934
8013	ENSG00000119508	NR4A3	nuclear receptor subfamily 4 group A member 3	1.22483	2.10405	16.7176	0.00310892	0.0234059
148870	ENSG00000162592	CCDC27	coiled-coil domain containing 27	-1.18689	-0.471111	16.3604	0.00314838	0.0236472
317671	ENSG00000175449	RFESD	Rieske Fe-S domain containing	1.12763	0.298085	16.2883	0.00318983	0.0238159
58498	ENSG00000106631	MYL7	myosin light chain 7	4.12974	-3.00646	16.2906	0.00318848	0.0238159
151	ENSG00000274286	ADRA2B	adrenoceptor alpha 2B	-1.43368	-0.57324	16.2807	0.00319419	0.0238283
91461	ENSG00000162878	PKDCC	protein kinase domain containing, cytoplasmic	1.52284	-0.370174	16.2533	0.00321015	0.023927
23127	ENSG00000198756	COLGALT2	collagen beta(1-O)galactosyltransferase 2	1.15728	0.0571654	15.9738	0.00337863	0.0248247
341359	ENSG00000110975	SYT10	synaptotagmin 10	1.25481	2.04853	16.3277	0.00337859	0.0248247
57481	ENSG00000250423	KIAA1210	KIAA1210	3.25594	-2.32314	15.9138	0.00341624	0.0250173
157574	ENSG00000214050	FBXO16	F-box protein 16	-1.03715	1.22093	15.7878	0.00349681	0.0253641
101927862	ENSG00000253978	TENM2-AS1	TENM2 antisense RNA 2	1.77214	-1.25228	15.7661	0.00351093	0.0254351
57413	ENSG00000121933	TMIGD3	transmembrane and immunoglobulin domain containing 3	5.66802	-3.26495	19.3645	0.00355685	0.025691
100131244	ENSG00000230778	ANKRD63	ankyrin repeat domain 63	-1.81948	-1.22964	15.6638	0.00357844	0.0257859
4613	ENSG00000134323	MYCN	MYCN proto-oncogene, bHLH transcription factor	-1.1875	0.0333026	15.6264	0.00360358	0.0258829
100505812	ENSG00000268001	CARD8-AS1	CARD8 antisense RNA 1	1.00053	0.659356	15.4405	0.0037315	0.0266159
7482	ENSG00000134245	WNT2B	Wnt family member 2B	-1.0045	1.55581	15.4355	0.003735	0.0266193
26278	ENSG00000151835	SACS	sacsin molecular chaperone	1.632	4.09889	19.4738	0.00374863	0.0267056
1116	ENSG00000133048	CHI3L1	chitinase 3 like 1	5.93858	-3.12375	18.9134	0.00377848	0.0268203
90288	ENSG00000172771	EFCAB12	EF-hand calcium binding domain 12	1.31815	-0.842739	15.3623	0.00378703	0.0268702
4843	ENSG00000007171	NOS2	nitric oxide synthase 2	3.77499	-2.19169	15.3232	0.00381513	0.0270586
219670	ENSG00000151023	ENKUR	enkurin, TRPC channel interacting protein	1.23875	-0.451273	15.32	0.00381745	0.0270601
131578	ENSG00000172061	LRRC15	leucine rich repeat containing 15	1.52103	-0.687374	15.2893	0.00383975	0.0271784
10481	ENSG00000159184	HOXB13	homeobox B13	-1.80442	-2.01455	15.1925	0.00391104	0.0275608
2069	ENSG00000124882	EREG	epiregulin	1.64286	-1.25405	15.0263	0.00403736	0.0281728
652995	ENSG00000214049	UCA1	urothelial cancer associated 1	1.16109	1.63751	15.0123	0.00404826	0.028211
4808	ENSG00000177551	NHLH2	nescient helix-loop-helix 2	2.15067	-2.23262	14.9995	0.00405826	0.0282694
57514	ENSG00000031081	ARHGAP31	Rho GTPase activating protein 31	-1.00414	1.03262	14.9863	0.00406857	0.0283076
2046	ENSG00000070886	EPHA8	EPH receptor A8	1.77153	-1.52899	14.9659	0.00408454	0.0283738
127841	ENSG00000280924	LINC00628	long intergenic non-protein coding RNA 628	1.02921	-0.357707	14.9515	0.00409592	0.0284415
168620	ENSG00000180535	BHLHA15	basic helix-loop-helix family member a15	-1.21658	-0.337577	14.9252	0.00411673	0.0285532
22806	ENSG00000161405	IKZF3	IKAROS family zinc finger 3	1.61358	-1.5429	14.9033	0.00413412	0.0286389
65249	ENSG00000132003	ZSWIM4	zinc finger SWIM-type containing 4	-1.0143	3.66805	16.0287	0.00413399	0.0286389
10156	ENSG00000105808	RASA4	RAS p21 protein activator 4	-1.40158	-0.310502	14.8715	0.0041596	0.0287587
127343	ENSG00000197587	DMBX1	diencephalon/mesencephalon homeobox 1	-1.79318	-1.71345	14.838	0.00418669	0.0288778
84171	ENSG00000138131	LOXL4	lysyl oxidase like 4	2.3713	-2.36817	14.6248	0.00436398	0.0297502
7097	ENSG00000137462	TLR2	toll like receptor 2	1.22791	-0.288699	14.6155	0.00437192	0.0297797
219537	ENSG00000214872	SMTNL1	smoothelin like 1	-1.83494	-0.427661	14.5794	0.00440293	0.0298997
55576	ENSG00000136011	STAB2	stabilin 2	3.13744	-2.73047	14.5584	0.00442109	0.0299555
8842	ENSG00000007062	PROM1	prominin 1	1.74779	-1.65587	14.4069	0.00455498	0.0305194
283948	ENSG00000257108	NHLRC4	NHL repeat containing 4	-1.73847	-1.70375	14.3814	0.00457794	0.0306281
8187	ENSG00000196793	ZNF239	zinc finger protein 239	1.0392	4.34543	16.0544	0.00465571	0.0309627
90342	ENSG00000249715	FER1L5	fer-1 like family member 5	-1.43884	-0.422219	14.1519	0.00479171	0.0316826
8744	ENSG00000125657	TNFSF9	TNF superfamily member 9	-1.02957	0.706018	14.1071	0.00483483	0.0318957
102724550	ENSG00000231574	LINC02015	long intergenic non-protein coding RNA 2015	1.62614	-1.49802	14.0474	0.0048931	0.0321473
7136	ENSG00000130598	TNNI2	troponin I2, fast skeletal type	3.06004	-2.76425	14.0486	0.0048919	0.0321473
23349	ENSG00000122733	PHF24	PHD finger protein 24	2.23735	-2.4521	13.9479	0.00499216	0.0326516
4330	ENSG00000169184	MN1	MN1 proto-oncogene, transcriptional regulator	1.08668	-0.201619	13.9389	0.00500118	0.0326985
120376	ENSG00000214290	POU2AF3	POU class 2 homeobox associating factor 3	3.19279	-3.04515	13.9149	0.00502554	0.0328211
100506178	ENSG00000232759	STEAP1B-AS1	STEAP1B antisense RNA 1	2.11813	-2.0044	13.8615	0.00508011	0.0331159
100847022	ENSG00000266307	MIR5093	microRNA 5093	2.89006	-2.8712	13.8501	0.00509188	0.0331803
100129845	ENSG00000224729	PCOLCE-AS1	PCOLCE antisense RNA 1	-2.0701	-1.8852	13.8348	0.00510771	0.0332588
9625	ENSG00000181409	AATK	apoptosis associated tyrosine kinase	-1.26894	1.84993	14.0831	0.00525347	0.0339188
399668	ENSG00000178947	SMIM10L2A	small integral membrane protein 10 like 2A	-1.01913	0.851285	13.6541	0.0052993	0.034177
101927495	ENSG00000250230	LOC101927495	uncharacterized LOC101927495	-1.90706	-1.64046	13.6523	0.00530131	0.0341774
6641	ENSG00000172164	SNTB1	syntrophin beta 1	1.00563	0.0796206	13.4971	0.00547311	0.0349789
343	ENSG00000103375	AQP8	aquaporin 8	3.32405	-2.28967	13.4532	0.00552299	0.035206
6338	ENSG00000168447	SCNN1B	sodium channel epithelial 1 subunit beta	1.29983	2.73828	14.5974	0.00560583	0.0355728
6347	ENSG00000108691	CCL2	C-C motif chemokine ligand 2	1.84658	-1.78587	13.3807	0.00560652	0.0355728
101927934	ENSG00000251169	LINC01843	long intergenic non-protein coding RNA 1843	-1.01339	-0.117883	13.3374	0.00565714	0.0357446
10326	ENSG00000101307	SIRPB1	signal regulatory protein beta 1	-1.08576	-0.364034	13.3295	0.00566648	0.0357446
92659	ENSG00000265688	MILIP	MYC inducible lncRNA inactivating p53	-1.14383	0.564166	13.3054	0.0056949	0.0358981
57127	ENSG00000132677	RHBG	Rh family B glycoprotein	-1.19619	2.73136	14.0567	0.00588004	0.0367356
3036	ENSG00000105509	HAS1	hyaluronan synthase 1	-2.26911	-2.72099	13.1398	0.00589553	0.0368103
81848	ENSG00000187678	SPRY4	sprouty RTK signaling antagonist 4	1.54808	1.42468	13.6989	0.00596633	0.0371558
127294	ENSG00000142661	MYOM3	myomesin 3	2.72033	-2.11068	13.0788	0.00597161	0.0371755
51378	ENSG00000101280	ANGPT4	angiopoietin 4	1.09738	-0.617094	13.0065	0.00606336	0.0376134
1544	ENSG00000140505	CYP1A2	cytochrome P450 family 1 subfamily A member 2	2.70939	-2.27803	12.9042	0.00619632	0.0381623
648791	ENSG00000219607	PPP1R3G	protein phosphatase 1 regulatory subunit 3G	-1.98156	-0.893315	12.8155	0.0063144	0.038679
645027	ENSG00000214860	EVPLL	envoplakin like	-1.64595	-0.37158	12.7787	0.00636426	0.0388895
140803	ENSG00000119121	TRPM6	transient receptor potential cation channel subfamily M member 6	1.3586	-0.9215	12.6621	0.00652527	0.0395433
5475	ENSG00000086717	PPEF1	protein phosphatase with EF-hand domain 1	1.1063	-0.680575	12.6213	0.00658283	0.0397686
64902	ENSG00000113492	AGXT2	alanine--glyoxylate aminotransferase 2	1.88531	-2.28104	12.5949	0.00662052	0.0398866
84525	ENSG00000171476	HOPX	HOP homeobox	1.16812	-0.447194	12.5832	0.00663726	0.0399326
50615	ENSG00000103522	IL21R	interleukin 21 receptor	1.26801	-0.928145	12.5513	0.00668307	0.0401533
3713	ENSG00000163207	IVL	involucrin	2.66602	-2.75945	12.5275	0.0067176	0.0402643
5288	ENSG00000139144	PIK3C2G	phosphatidylinositol-4-phosphate 3-kinase catalytic subunit type 2 gamma	2.12489	-1.52599	12.5091	0.00674452	0.0403843
400661	ENSG00000276397	LINC01879	long intergenic non-protein coding RNA 1879	2.30159	-2.97214	12.4798	0.00678752	0.0405865
51129	ENSG00000167772	ANGPTL4	angiopoietin like 4	-2.19019	2.85555	15.7109	0.00681437	0.0406502
4892	ENSG00000197893	NRAP	nebulin related anchoring protein	3.15057	-2.1791	12.4422	0.00684309	0.0407661
54541	ENSG00000168209	DDIT4	DNA damage inducible transcript 4	-1.04215	7.5493	14.8019	0.00691479	0.0411097
10485	ENSG00000125462	MIR9-1HG	MIR9-1 host gene	-1.79015	-1.84836	12.35	0.00698202	0.0414112
123096	ENSG00000197119	SLC25A29	solute carrier family 25 member 29	-1.03654	7.15538	14.8306	0.00698136	0.0414112
440925	ENSG00000222033	LINC01124	long intergenic non-protein coding RNA 1124	-1.81723	-2.07986	12.3382	0.00700007	0.0414344
645158	ENSG00000266405	CBX3P2	CBX3 pseudogene 2	1.66207	-0.710672	12.3187	0.00703009	0.0415655
100506874	ENSG00000291028	LINC00933	long intergenic non-protein coding RNA 933	-1.13439	-0.587804	12.2871	0.0070789	0.0417309
645121	ENSG00000205089	CCNI2	cyclin I family member 2	-1.19925	-0.828857	12.2668	0.00711047	0.0418604
344887	ENSG00000290862	NMRAL2P	NmrA like redox sensor 2, pseudogene	2.81612	-2.62198	12.2449	0.0071448	0.0419927
340061	ENSG00000184584	STING1	stimulator of interferon response cGAMP interactor 1	-1.38437	-0.445229	12.2306	0.00716721	0.0420747
285382	ENSG00000187068	C3orf70	chromosome 3 open reading frame 70	1.84748	-0.742699	12.2058	0.00720645	0.0422289
85360	ENSG00000105137	SYDE1	synapse defective Rho GTPase homolog 1	-1.37343	2.32748	13.2004	0.00727012	0.042479
6101	ENSG00000104237	RP1	RP1 axonemal microtubule associated	2.63321	-2.76941	12.1485	0.00729801	0.0425669
2042	ENSG00000044524	EPHA3	EPH receptor A3	1.51934	-0.92321	12.0942	0.00738629	0.0430246
284680	ENSG00000171722	SPATA46	spermatogenesis associated 46	1.32315	0.0714118	12.0127	0.007521	0.0436213
4688	ENSG00000116701	NCF2	neutrophil cytosolic factor 2	1.38894	-0.526519	12.0003	0.00754188	0.0436927
200420	ENSG00000290727	ALMS1P1	ALMS1 pseudogene 1	1.66847	-1.54052	11.9837	0.00756969	0.0437881
646643	ENSG00000187550	SBK2	SH3 domain binding kinase family member 2	-2.15559	0.577011	12.848	0.00764859	0.0441427
83723	ENSG00000149926	TLCD3B	TLC domain containing 3B	-1.02269	0.0714562	11.8706	0.00776353	0.0445628
402160	ENSG00000206113	CFAP99	cilia and flagella associated protein 99	1.01056	-0.265316	11.834	0.00782751	0.0447822
5028	ENSG00000169860	P2RY1	purinergic receptor P2Y1	2.53962	-2.38079	11.815	0.00786097	0.0449002
606293	ENSG00000290915	KLKP1	kallikrein pseudogene 1	1.10731	1.05577	11.7862	0.00791197	0.0450706
27296	ENSG00000124251	TP53TG5	TP53 target 5	-1.20854	-0.850198	11.7782	0.00792622	0.0451225
347454	ENSG00000187808	SOWAHD	sosondowah ankyrin repeat domain family member D	-1.21072	-0.653922	11.7754	0.00793127	0.0451366
3576	ENSG00000169429	CXCL8	C-X-C motif chemokine ligand 8	1.05899	0.058221	11.7076	0.00805348	0.0456546
4608	ENSG00000133055	MYBPH	myosin binding protein H	2.2215	-2.41427	11.6492	0.00816076	0.0460695
1015	ENSG00000079112	CDH17	cadherin 17	2.31241	-2.39522	11.5988	0.00825462	0.0464055
9955	ENSG00000153976	HS3ST3A1	heparan sulfate-glucosamine 3-sulfotransferase 3A1	1.21368	-0.404683	11.5716	0.00830594	0.0466524
5210	ENSG00000114268	PFKFB4	6-phosphofructo-2-kinase/fructose-2,6-biphosphatase 4	-1.78704	4.54817	15.1312	0.0083121	0.046654
100422934	ENSG00000265565	MIR3143	microRNA 3143	2.80112	-2.93807	11.5383	0.0083692	0.0469145
58511	ENSG00000137976	DNASE2B	deoxyribonuclease 2 beta	-2.5332	-2.72509	11.5129	0.00841783	0.0471119
100302401	ENSG00000224687	RASAL2-AS1	RASAL2 antisense RNA 1	1.2699	-1.46053	11.4988	0.00844514	0.0471746
929	ENSG00000170458	CD14	CD14 molecule	1.20656	-1.13754	11.411	0.00861676	0.0479503
101927688	ENSG00000264672	SEPTIN4-AS1	SEPTIN4 antisense RNA 1	-1.10882	-0.30127	11.3702	0.00869805	0.0482042
644672	ENSG00000228607	CLDN25	claudin 25	5.76291	-3.24927	13.4471	0.00872711	0.0482891
5346	ENSG00000166819	PLIN1	perilipin 1	1.62604	-0.811129	11.3098	0.00882005	0.0486807
768239	ENSG00000178597	PSAPL1	prosaposin like 1	2.12932	-2.52675	11.3048	0.0088302	0.0486908
11107	ENSG00000138738	PRDM5	PR/SET domain 5	-1.14596	-0.947141	11.2119	0.0090222	0.0495147
84814	ENSG00000160539	PLPP7	phospholipid phosphatase 7 (inactive)	-1.96163	-2.75855	11.2051	0.00903643	0.0495635
115111	ENSG00000147606	SLC26A7	solute carrier family 26 member 7	1.59156	-1.97974	11.188	0.00907249	0.0497094
4821	ENSG00000125820	NKX2-2	NK2 homeobox 2	-1.30587	-0.702109	11.1715	0.0091075	0.0497824

## Sheet: All_gene_expre
ENTREZID	ENSEMBL	GENE SYMBOL	GENE NAME	Log2FC	log2(CPM)	F	p-value	FDR
6297	ENSG00000165821	SALL2	spalt like transcription factor 2	-2.69945	4.79731	945.888	3.8e-10	6.67e-06
254778	ENSG00000169085	VXN	vexin	3.11563	3.37104	497.802	5.92e-09	2.38e-05
4886	ENSG00000164128	NPY1R	neuropeptide Y receptor Y1	1.82294	7.26185	529.173	4.57e-09	2.38e-05
8645	ENSG00000164626	KCNK5	potassium two pore domain channel subfamily K member 5	2.87078	4.07542	525.125	4.72e-09	2.38e-05
9886	ENSG00000072422	RHOBTB1	Rho related BTB domain containing 1	1.64783	5.37036	482.187	6.79e-09	2.38e-05
1836	ENSG00000155850	SLC26A2	solute carrier family 26 member 2	2.2315	6.49189	454.248	8.75e-09	2.56e-05
221662	ENSG00000112183	RBM24	RNA binding motif protein 24	2.41674	4.22707	436.38	1.04e-08	2.61e-05
5174	ENSG00000174827	PDZK1	PDZ domain containing 1	2.96483	2.56596	412.433	1.32e-08	2.61e-05
57493	ENSG00000173706	HEG1	heart development protein with EGF like domains 1	3.58878	3.80665	401.609	1.48e-08	2.61e-05
79929	ENSG00000180834	MAP6D1	MAP6 domain containing 1	1.7715	4.87351	401.031	1.49e-08	2.61e-05
24147	ENSG00000179431	FJX1	four-jointed box kinase 1	1.77921	4.78064	373.186	2.02e-08	3.05e-05
57523	ENSG00000205978	NYNRIN	NYN domain and retroviral integrase containing	-1.85073	4.29744	370.467	2.08e-08	3.05e-05
26353	ENSG00000152137	HSPB8	heat shock protein family B (small) member 8	1.83266	7.67069	351.851	2.59e-08	3.25e-05
5979	ENSG00000165731	RET	ret proto-oncogene	1.70232	6.45969	356.311	2.45e-08	3.25e-05
23223	ENSG00000052749	RRP12	ribosomal RNA processing 12 homolog	1.36096	6.07898	343.162	2.88e-08	3.37e-05
158046	ENSG00000130045	NXNL2	nucleoredoxin like 2	1.90342	3.31708	320.027	3.87e-08	3.63e-05
158046	ENSG00000291520	NXNL2	nucleoredoxin like 2	1.90342	3.31708	320.027	3.87e-08	3.63e-05
2296	ENSG00000054598	FOXC1	forkhead box C1	2.18254	4.86674	330.713	3.37e-08	3.63e-05
80324	ENSG00000177192	PUS1	pseudouridine synthase 1	1.35597	5.87058	318.865	3.93e-08	3.63e-05
94122	ENSG00000147041	SYTL5	synaptotagmin like 5	1.50553	4.449	319.043	3.92e-08	3.63e-05
4143	ENSG00000151224	MAT1A	methionine adenosyltransferase 1A	3.47862	1.93721	301.533	4.97e-08	3.97e-05
63035	ENSG00000085185	BCORL1	BCL6 corepressor like 1	-2.32987	4.6687	305.868	4.68e-08	3.97e-05
861	ENSG00000159216	RUNX1	RUNX family transcription factor 1	1.6891	6.03781	302.315	4.92e-08	3.97e-05
9816	ENSG00000135763	URB2	URB2 ribosome biogenesis homolog	1.31333	5.70541	296.775	5.32e-08	4.06e-05
3754	ENSG00000162975	KCNF1	potassium voltage-gated channel modifier subfamily F member 1	2.81946	3.19445	292.745	5.63e-08	4.12e-05
4609	ENSG00000136997	MYC	MYC proto-oncogene, bHLH transcription factor	1.45129	7.36221	281.746	6.62e-08	4.47e-05
54549	ENSG00000069188	SDK2	sidekick cell adhesion molecule 2	2.11287	2.98381	281.777	6.62e-08	4.47e-05
79605	ENSG00000177614	PGBD5	piggyBac transposable element derived 5	2.0012	3.06179	279.217	6.88e-08	4.47e-05
3860	ENSG00000171401	KRT13	keratin 13	4.81746	0.845588	275.103	7.32e-08	4.59e-05
10125	ENSG00000172575	RASGRP1	RAS guanyl releasing protein 1	2.39441	5.93305	262.845	9.3e-08	5.03e-05
113230	ENSG00000141854	MISP3	MISP family member 3	-1.3894	4.91876	258.46	9.52e-08	5.03e-05
113230	ENSG00000288191	MISP3	MISP family member 3	-1.3894	4.91876	258.46	9.52e-08	5.03e-05
23286	ENSG00000113645	WWC1	WW and C2 domain containing 1	1.22575	7.00937	257.093	9.73e-08	5.03e-05
27202	ENSG00000134830	C5AR2	complement C5a receptor 2	1.60405	3.7101	262.781	8.87e-08	5.03e-05
6584	ENSG00000197375	SLC22A5	solute carrier family 22 member 5	1.52106	5.68313	261.978	8.99e-08	5.03e-05
771	ENSG00000074410	CA12	carbonic anhydrase 12	1.39345	8.93886	260.957	9.14e-08	5.03e-05
55565	ENSG00000102984	ZNF821	zinc finger protein 821	-1.47531	4.34901	254.427	1.02e-07	5.1e-05
118980	ENSG00000156398	SFXN2	sideroflexin 2	1.715	5.10309	250.531	1.08e-07	5.15e-05
51317	ENSG00000135365	PHF21A	PHD finger protein 21A	-1.34303	4.93294	250.752	1.08e-07	5.15e-05
6840	ENSG00000197321	SVIL	supervillin	1.14245	7.54592	248.406	1.12e-07	5.2e-05
6875	ENSG00000141384	TAF4B	TATA-box binding protein associated factor 4b	1.5529	4.47189	245.119	1.19e-07	5.27e-05
7052	ENSG00000198959	TGM2	transglutaminase 2	3.34385	1.85527	244.535	1.2e-07	5.27e-05
102724515	ENSG00000204792	LINC01291	long intergenic non-protein coding RNA 1291	1.96533	2.75633	238.873	1.32e-07	5.29e-05
3055	ENSG00000101336	HCK	HCK proto-oncogene, Src family tyrosine kinase	3.1689	1.58804	241.391	1.27e-07	5.29e-05
8000	ENSG00000167653	PSCA	prostate stem cell antigen	-2.01706	3.59201	240.804	1.28e-07	5.29e-05
80757	ENSG00000184986	TMEM121	transmembrane protein 121	-1.8216	3.62694	239.111	1.32e-07	5.29e-05
10885	ENSG00000065183	WDR3	WD repeat domain 3	1.34826	6.4113	237.21	1.36e-07	5.33e-05
9203	ENSG00000147130	ZMYM3	zinc finger MYM-type containing 3	-1.18931	5.60422	234.74	1.43e-07	5.44e-05
80746	ENSG00000154743	TSEN2	tRNA splicing endonuclease subunit 2	1.20838	5.03318	232.644	1.48e-07	5.53e-05
220992	ENSG00000198298	ZNF485	zinc finger protein 485	1.55208	3.86429	228.288	1.6e-07	5.86e-05
168544	ENSG00000181444	ZNF467	zinc finger protein 467	-1.30491	6.38118	226.66	1.65e-07	5.92e-05
23212	ENSG00000179041	RRS1	ribosome biogenesis regulator 1 homolog	1.50747	6.30777	223.574	1.75e-07	6.02e-05
23670	ENSG00000135048	CEMIP2	cell migration inducing hyaluronidase 2	1.45554	6.80923	223.712	1.74e-07	6.02e-05
25976	ENSG00000163659	TIPARP	TCDD inducible poly(ADP-ribose) polymerase	1.43704	5.48517	220.642	1.85e-07	6.12e-05
7074	ENSG00000156299	TIAM1	TIAM Rac1 associated GEF 1	1.51191	4.68117	220.63	1.85e-07	6.12e-05
11098	ENSG00000150687	PRSS23	serine protease 23	1.67283	5.72767	218.042	1.94e-07	6.22e-05
140685	ENSG00000130584	ZBTB46	zinc finger and BTB domain containing 46	-1.26073	4.52792	215.853	2.02e-07	6.22e-05
55809	ENSG00000124496	TRERF1	transcriptional regulating factor 1	-1.60032	5.89591	215.112	2.05e-07	6.22e-05
56172	ENSG00000154122	ANKH	ANKH inorganic pyrophosphate transport regulator	1.17885	4.6972	215.868	2.02e-07	6.22e-05
9569	ENSG00000006704	GTF2IRD1	GTF2I repeat domain containing 1	-1.80664	5.32919	215.64	2.03e-07	6.22e-05
283578	ENSG00000100580	TMED8	transmembrane p24 trafficking protein family member 8	1.2715	7.02789	210.178	2.26e-07	6.74e-05
25865	ENSG00000105287	PRKD2	protein kinase D2	-1.20786	5.99832	204.589	2.53e-07	6.84e-05
2633	ENSG00000117228	GBP1	guanylate binding protein 1	1.6652	3.05774	205.775	2.47e-07	6.84e-05
2886	ENSG00000141738	GRB7	growth factor receptor bound protein 7	-1.61772	3.76774	205.859	2.47e-07	6.84e-05
5097	ENSG00000156453	PCDH1	protocadherin 1	-1.59181	4.73854	208.237	2.35e-07	6.84e-05
55672	ENSG00000219481	NBPF1	NBPF member 1	1.28872	5.20394	207.652	2.38e-07	6.84e-05
55672	ENSG00000292225	NBPF1	NBPF member 1	1.28872	5.20394	207.652	2.38e-07	6.84e-05
57224	ENSG00000135540	NHSL1	NHS like 1	1.25257	5.0283	204.819	2.52e-07	6.84e-05
9181	ENSG00000116584	ARHGEF2	Rho/Rac guanine nucleotide exchange factor 2	-1.08737	5.70433	203.167	2.61e-07	6.94e-05
25929	ENSG00000082516	GEMIN5	gem nuclear organelle associated protein 5	1.07482	6.37302	201.159	2.72e-07	7.02e-05
83732	ENSG00000124784	RIOK1	RIO kinase 1	1.22143	4.93584	201.695	2.69e-07	7.02e-05
26018	ENSG00000144749	LRIG1	leucine rich repeats and immunoglobulin like domains 1	1.04864	5.97758	199.502	2.81e-07	7.07e-05
79134	ENSG00000226479	TMEM185B	transmembrane protein 185B	1.04231	6.39627	198.992	2.84e-07	7.07e-05
90427	ENSG00000104081	BMF	Bcl2 modifying factor	-1.39485	4.54016	198.749	2.86e-07	7.07e-05
9687	ENSG00000196208	GREB1	growth regulating estrogen receptor binding 1	1.48598	8.88285	195.332	3.07e-07	7.49e-05
2274	ENSG00000115641	FHL2	four and a half LIM domains 2	2.06914	3.9203	190.79	3.39e-07	8.04e-05
7005	ENSG00000007866	TEAD3	TEA domain transcription factor 3	-1.00826	5.88256	191.051	3.37e-07	8.04e-05
1545	ENSG00000138061	CYP1B1	cytochrome P450 family 1 subfamily B member 1	1.98961	7.85719	189.838	3.54e-07	8.3e-05
9619	ENSG00000160179	ABCG1	ATP binding cassette subfamily G member 1	-1.0769	6.46333	187.75	3.62e-07	8.37e-05
4602	ENSG00000118513	MYB	MYB proto-oncogene, transcription factor	1.30067	6.00265	186.587	3.72e-07	8.48e-05
7464	ENSG00000106789	CORO2A	coronin 2A	-1.20442	4.74025	184.929	3.86e-07	8.68e-05
9846	ENSG00000033327	GAB2	GRB2 associated binding protein 2	1.06886	5.57765	183.366	3.99e-07	8.88e-05
794	ENSG00000172137	CALB2	calbindin 2	3.93463	1.43798	181.583	4.16e-07	9.13e-05
794	ENSG00000282830	CALB2	calbindin 2	3.93463	1.43798	181.583	4.16e-07	9.13e-05
10740	NA	RFPL1S	RFPL1 antisense RNA 1	4.08977	0.707275	175.372	4.81e-07	9.48e-05
1543	ENSG00000140465	CYP1A1	cytochrome P450 family 1 subfamily A member 1	2.13655	6.35641	190.051	4.61e-07	9.48e-05
23160	ENSG00000163811	WDR43	WD repeat domain 43	1.00759	7.16591	174.476	4.91e-07	9.48e-05
3487	ENSG00000141753	IGFBP4	insulin like growth factor binding protein 4	1.1579	8.05148	177.685	4.55e-07	9.48e-05
440465	ENSG00000226137	BAIAP2-DT	BAIAP2 divergent transcript	-1.354	4.20308	178.495	4.47e-07	9.48e-05
51760	ENSG00000103528	SYT17	synaptotagmin 17	-1.30687	4.37667	175.311	4.81e-07	9.48e-05
5465	ENSG00000186951	PPARA	peroxisome proliferator activated receptor alpha	-1.37036	3.75198	178.996	4.41e-07	9.48e-05
56652	ENSG00000107815	TWNK	twinkle mtDNA helicase	1.29928	5.60154	176.565	4.67e-07	9.48e-05
59339	ENSG00000169499	PLEKHA2	pleckstrin homology domain containing A2	-1.25798	4.27022	174.879	4.86e-07	9.48e-05
60437	ENSG00000124215	CDH26	cadherin 26	2.83407	1.76099	174.623	4.89e-07	9.48e-05
860	ENSG00000124813	RUNX2	RUNX family transcription factor 2	1.34069	4.33819	177.328	4.59e-07	9.48e-05
94241	ENSG00000164938	TP53INP1	tumor protein p53 inducible nuclear protein 1	-1.15632	6.4419	173.644	5.01e-07	9.56e-05
10171	ENSG00000120158	RCL1	RNA terminal phosphate cyclase like 1	1.4385	5.40008	172.468	5.15e-07	9.73e-05
29995	ENSG00000071282	LMCD1	LIM and cysteine rich domains 1	1.47903	5.01929	170.509	5.4e-07	9.98e-05
56999	ENSG00000163638	ADAMTS9	ADAM metallopeptidase with thrombospondin type 1 motif 9	1.70702	3.58121	170.587	5.39e-07	9.98e-05
1736	ENSG00000130826	DKC1	dyskerin pseudouridine synthase 1	1.11319	7.30299	168.747	5.64e-07	0.00010156
55199	ENSG00000158483	FAM86C1P	family with sequence similarity 86 member C1, pseudogene	1.18142	4.15667	168.145	5.72e-07	0.00010156
7039	ENSG00000163235	TGFA	transforming growth factor alpha	1.98171	3.70653	168.125	5.72e-07	0.00010156
79754	ENSG00000196372	ASB13	ankyrin repeat and SOCS box containing 13	1.05337	5.74348	168.756	5.64e-07	0.00010156
257364	ENSG00000173548	SNX33	sorting nexin 33	-1.16131	4.71315	165.944	6.04e-07	0.000105808
6478	ENSG00000181788	SIAH2	siah E3 ubiquitin protein ligase 2	1.45258	7.67362	165.27	6.14e-07	0.000105808
84187	ENSG00000157600	TMEM164	transmembrane protein 164	1.32473	4.80486	165.432	6.12e-07	0.000105808
54517	ENSG00000091127	PUS7	pseudouridine synthase 7	0.998484	6.13204	163.231	6.47e-07	0.000110297
100507584	ENSG00000249346	LINC01016	long intergenic non-protein coding RNA 1016	4.5412	3.2739	198.566	6.87e-07	0.000116094
118738	ENSG00000265763	ZNF488	zinc finger protein 488	2.92246	0.928483	160.242	6.98e-07	0.000116779
10439	ENSG00000130558	OLFM1	olfactomedin 1	1.0477	5.92195	158	7.4e-07	0.000122606
157285	ENSG00000275342	PRAG1	PEAK1 related, kinase-activating pseudokinase 1	1.0979	5.94861	156.56	7.68e-07	0.00012382
157285	ENSG00000292308	PRAG1	PEAK1 related, kinase-activating pseudokinase 1	1.0979	5.94861	156.56	7.68e-07	0.00012382
1628	ENSG00000105516	DBP	D-box binding PAR bZIP transcription factor	-1.56967	4.90456	156.75	7.64e-07	0.00012382
4603	ENSG00000185697	MYBL1	MYB proto-oncogene like 1	2.59716	6.15125	190.079	7.6e-07	0.00012382
8908	ENSG00000056998	GYG2	glycogenin 2	-1.22085	3.9703	155.814	7.84e-07	0.000125135
51491	ENSG00000048162	NOP16	NOP16 nucleolar protein	1.26561	5.78755	154.384	8.14e-07	0.000128811
92979	ENSG00000139266	MARCHF9	membrane associated ring-CH-type finger 9	-1.06521	4.89523	153.852	8.26e-07	0.000129488
4234	ENSG00000037897	METTL1	methyltransferase 1, tRNA methylguanosine	1.66141	5.07855	153.382	8.36e-07	0.00012997
4839	ENSG00000111641	NOP2	NOP2 nucleolar protein	0.995518	5.49508	152.822	8.49e-07	0.000130787
102723344	NA	LINC02568	long intergenic non-protein coding RNA 2568	2.32084	2.10215	152.284	8.61e-07	0.000131546
146330	ENSG00000127585	FBXL16	F-box and leucine rich repeat protein 16	-1.15014	5.54608	151.852	8.71e-07	0.000131949
10614	ENSG00000186834	HEXIM1	HEXIM P-TEFb complex subunit 1	-0.96853	6.32127	149.19	9.37e-07	0.000134797
115708	ENSG00000166166	TRMT61A	tRNA methyltransferase 61A	1.0283	5.40375	149.109	9.39e-07	0.000134797
1802	ENSG00000132768	DPH2	diphthamide biosynthesis 2	1.09743	5.20852	149.862	9.2e-07	0.000134797
23007	ENSG00000114805	PLCH1	phospholipase C eta 1	-1.31067	4.3441	150.626	9.01e-07	0.000134797
51559	ENSG00000111696	NT5DC3	5'-nucleotidase domain containing 3	1.70756	3.85713	148.931	9.44e-07	0.000134797
56919	ENSG00000005100	DHX33	DEAH-box helicase 33	0.951118	6.2112	149.294	9.34e-07	0.000134797
79828	ENSG00000123600	METTL8	methyltransferase 8, tRNA N3-cytidine	1.03521	4.78228	150.136	9.13e-07	0.000134797
7100	ENSG00000187554	TLR5	toll like receptor 5	1.67084	2.50924	148.556	9.54e-07	0.000135102
3756	ENSG00000143473	KCNH1	potassium voltage-gated channel subfamily H member 1	2.24737	1.82876	148.132	9.65e-07	0.000135608
3708	ENSG00000150995	ITPR1	inositol 1,4,5-trisphosphate receptor type 1	1.88773	4.24018	146.796	1e-06	0.000139636
399665	ENSG00000167106	EEIG1	estrogen-induced osteoclastogenesis regulator 1	0.938639	8.50163	146.416	1.01e-06	0.000140022
11031	ENSG00000168461	RAB31	RAB31, member RAS oncogene family	0.957047	6.34715	145.11	1.05e-06	0.000143052
342184	ENSG00000248905	FMN1	formin 1	1.6375	4.49262	145.103	1.05e-06	0.000143052
18	ENSG00000183044	ABAT	4-aminobutyrate aminotransferase	0.938893	8.32034	144.262	1.08e-06	0.000145378
79691	ENSG00000151576	QTRT2	queuine tRNA-ribosyltransferase accessory subunit 2	0.89132	6.18694	143.221	1.11e-06	0.000148626
3909	ENSG00000053747	LAMA3	laminin subunit alpha 3	1.66691	4.94409	142.62	1.13e-06	0.000150066
54865	ENSG00000160818	GPATCH4	G-patch domain containing 4 (gene/pseudogene)	1.01363	6.13791	140.966	1.18e-06	0.000156241
54865	ENSG00000292251	GPATCH4	G-patch domain containing 4 (gene/pseudogene)	1.01363	6.13791	140.966	1.18e-06	0.000156241
6563	ENSG00000141469	SLC14A1	solute carrier family 14 member 1 (Kidd blood group)	2.97733	0.915021	139.601	1.23e-06	0.000161392
7450	ENSG00000110799	VWF	von Willebrand factor	3.11151	1.00712	139.084	1.25e-06	0.000162653
4773	ENSG00000101096	NFATC2	nuclear factor of activated T cells 2	1.09139	5.87267	137.617	1.31e-06	0.000168625
3128	ENSG00000290878	HLA-DRB6	major histocompatibility complex, class II, DR beta 6 (pseudogene)	2.87845	1.86004	137.256	1.32e-06	0.000169209
64318	ENSG00000173145	NOC3L	NOC3 like DNA replication regulator	1.1992	5.16835	136.334	1.36e-06	0.000172681
1112	ENSG00000053254	FOXN3	forkhead box N3	-0.934215	5.62042	135.578	1.39e-06	0.000174572
80320	ENSG00000189120	SP6	Sp6 transcription factor	-1.23131	4.60889	135.495	1.39e-06	0.000174572
10475	ENSG00000112343	TRIM38	tripartite motif containing 38	-1.23555	4.35886	133.071	1.5e-06	0.000184016
29914	ENSG00000120942	UBIAD1	UbiA prenyltransferase domain containing 1	1.2731	4.72251	133.491	1.48e-06	0.000184016
84549	ENSG00000198042	MAK16	MAK16 homolog	0.991097	4.67605	133.131	1.5e-06	0.000184016
22822	ENSG00000139289	PHLDA1	pleckstrin homology like domain family A member 1	1.58519	6.42615	132.487	1.54e-06	0.000184496
2535	ENSG00000180340	FZD2	frizzled class receptor 2	-1.15822	3.70056	132.311	1.53e-06	0.000184496
2669	ENSG00000164949	GEM	GTP binding protein overexpressed in skeletal muscle	1.81918	3.27164	130.7	1.61e-06	0.000184496
330	ENSG00000023445	BIRC3	baculoviral IAP repeat containing 3	1.62224	3.44746	131.127	1.59e-06	0.000184496
51564	ENSG00000061273	HDAC7	histone deacetylase 7	-0.944739	5.74761	130.762	1.61e-06	0.000184496
64798	ENSG00000155792	DEPTOR	DEP domain containing MTOR interacting protein	1.21737	4.82206	131.951	1.55e-06	0.000184496
7168	ENSG00000140416	TPM1	tropomyosin 1	0.876743	7.53838	130.597	1.62e-06	0.000184496
80820	ENSG00000122547	EEPD1	endonuclease/exonuclease/phosphatase family domain containing 1	2.17593	1.9237	130.964	1.6e-06	0.000184496
9188	ENSG00000165732	DDX21	DExD-box helicase 21	1.11305	8.4045	131.637	1.57e-06	0.000184496
92935	ENSG00000247626	MARS2	methionyl-tRNA synthetase 2, mitochondrial	1.10819	5.12427	132.033	1.55e-06	0.000184496
9645	ENSG00000133816	MICAL2	microtubule associated monooxygenase, calponin and LIM domain containing 2	1.16197	4.59822	131.074	1.59e-06	0.000184496
23498	ENSG00000162882	HAAO	3-hydroxyanthranilate 3,4-dioxygenase	3.0568	0.247238	130.316	1.63e-06	0.000184909
55244	ENSG00000142494	SLC47A1	solute carrier family 47 member 1	3.38284	0.132049	130.114	1.64e-06	0.000184909
1503	ENSG00000171793	CTPS1	CTP synthase 1	0.94568	5.90384	128.4	1.73e-06	0.00019395
5581	ENSG00000171132	PRKCE	protein kinase C epsilon	0.985144	5.1143	128.166	1.75e-06	0.000194163
84456	ENSG00000198945	L3MBTL3	L3MBTL histone methyl-lysine binding protein 3	-1.94554	1.54993	127.751	1.77e-06	0.000195513
8165	ENSG00000121057	AKAP1	A-kinase anchoring protein 1	0.968349	7.51812	125.41	1.91e-06	0.000209511
81792	ENSG00000151388	ADAMTS12	ADAM metallopeptidase with thrombospondin type 1 motif 12	2.71562	0.70739	124.776	1.95e-06	0.000212554
81792	ENSG00000281690	ADAMTS12	ADAM metallopeptidase with thrombospondin type 1 motif 12	2.71562	0.70739	124.776	1.95e-06	0.000212554
7023	ENSG00000090447	TFAP4	transcription factor AP-4	0.934703	4.55186	124.464	1.97e-06	0.000213411
1788	ENSG00000119772	DNMT3A	DNA methyltransferase 3 alpha	-0.923065	5.79581	124.022	2e-06	0.000214331
23508	ENSG00000133985	TTC9	tetratricopeptide repeat domain 9	-0.876084	5.39505	123.902	2e-06	0.000214331
9722	ENSG00000198929	NOS1AP	nitric oxide synthase 1 adaptor protein	1.6572	4.5649	123.774	2.01e-06	0.000214331
901	ENSG00000138764	CCNG2	cyclin G2	-0.859683	6.69917	121.819	2.15e-06	0.000227305
1960	ENSG00000179388	EGR3	early growth response 3	2.79293	5.0056	154.272	2.23e-06	0.000232847
2494	ENSG00000116833	NR5A2	nuclear receptor subfamily 5 group A member 2	3.84936	1.35336	120.673	2.23e-06	0.000232847
57605	ENSG00000090975	PITPNM2	phosphatidylinositol transfer protein membrane associated 2	1.5022	3.60729	120.568	2.24e-06	0.000232847
84946	ENSG00000135521	LTV1	LTV1 ribosome biogenesis factor	0.971023	5.50083	120.158	2.27e-06	0.000234702
27042	ENSG00000117597	UTP25	UTP25 small subunit processome component	0.970014	4.8375	119.095	2.35e-06	0.000235379
27340	ENSG00000120800	UTP20	UTP20 small subunit processome component	1.17547	5.80349	119.215	2.35e-06	0.000235379
5152	ENSG00000160191	PDE9A	phosphodiesterase 9A	-1.11017	3.81014	118.887	2.37e-06	0.000235379
6446	ENSG00000118515	SGK1	serum/glucocorticoid regulated kinase 1	2.06564	3.1214	118.937	2.37e-06	0.000235379
6566	ENSG00000155380	SLC16A1	solute carrier family 16 member 1	1.05207	4.35332	119.319	2.34e-06	0.000235379
6566	ENSG00000281917	SLC16A1	solute carrier family 16 member 1	1.05207	4.35332	119.319	2.34e-06	0.000235379
79080	ENSG00000110104	CCDC86	coiled-coil domain containing 86	1.18634	5.93719	119.864	2.29e-06	0.000235379
80164	ENSG00000183248	PRR36	proline rich 36	-0.980459	5.02502	119.178	2.35e-06	0.000235379
155382	ENSG00000176428	VPS37D	VPS37D subunit of ESCRT-I	-1.89737	2.12299	118.564	2.4e-06	0.000236657
23254	ENSG00000189337	KAZN	kazrin, periplakin interacting protein	0.98753	4.40158	118.057	2.44e-06	0.000239465
9580	ENSG00000143842	SOX13	SRY-box transcription factor 13	-0.805451	5.72452	117.842	2.46e-06	0.000239906
262	ENSG00000123505	AMD1	adenosylmethionine decarboxylase 1	1.17775	7.48458	117.357	2.5e-06	0.000242614
2355	ENSG00000075426	FOSL2	FOS like 2, AP-1 transcription factor subunit	1.07338	7.51903	117.042	2.53e-06	0.000243921
705	ENSG00000112578	BYSL	bystin like	1.04177	5.65133	116.652	2.56e-06	0.000245899
10849	ENSG00000117877	POLR1G	RNA polymerase I subunit G	1.39516	4.11234	115.958	2.62e-06	0.000249082
149175	ENSG00000185090	MANEAL	mannosidase endo-alpha like	0.826251	5.40822	115.818	2.64e-06	0.000249082
164832	ENSG00000170500	LONRF2	LON peptidase N-terminal domain and ring finger 2	1.47346	6.52307	116.289	2.62e-06	0.000249082
55890	ENSG00000170412	GPRC5C	G protein-coupled receptor class C group 5 member C	-0.953839	5.37658	114.981	2.72e-06	0.000251443
55890	ENSG00000291917	GPRC5C	G protein-coupled receptor class C group 5 member C	-0.953839	5.37658	114.981	2.72e-06	0.000251443
57659	ENSG00000174282	ZBTB4	zinc finger and BTB domain containing 4	-0.788315	6.67077	115.017	2.71e-06	0.000251443
57659	ENSG00000283868	ZBTB4	zinc finger and BTB domain containing 4	-0.788315	6.67077	115.017	2.71e-06	0.000251443
64434	ENSG00000146909	NOM1	nucleolar protein with MIF4G domain 1	0.891458	6.00268	114.944	2.72e-06	0.000251443
79896	ENSG00000185875	THNSL1	threonine synthase like 1	1.14904	5.86925	115.199	2.7e-06	0.000251443
25803	ENSG00000124664	SPDEF	SAM pointed domain containing ETS transcription factor	-0.906983	7.67487	113.994	2.81e-06	0.000256002
8291	ENSG00000135636	DYSF	dysferlin	2.87873	0.906629	114.048	2.81e-06	0.000256002
84172	ENSG00000125630	POLR1B	RNA polymerase I subunit B	0.959215	6.79633	114.209	2.79e-06	0.000256002
10528	ENSG00000101361	NOP56	NOP56 ribonucleoprotein	0.790429	7.09989	113.42	2.87e-06	0.000258618
7779	ENSG00000170385	SLC30A1	solute carrier family 30 member 1	0.903583	4.77774	113.522	2.86e-06	0.000258618
8463	ENSG00000074219	TEAD2	TEA domain transcription factor 2	-0.847986	5.8377	113.088	2.9e-06	0.000260372
133308	ENSG00000164038	SLC9B2	solute carrier family 9 member B2	1.42269	2.83108	112.809	2.93e-06	0.000260571
134	ENSG00000163485	ADORA1	adenosine A1 receptor	1.85782	2.66732	112.483	2.97e-06	0.000260571
200942	ENSG00000185909	KLHDC8B	kelch domain containing 8B	-1.36369	3.20405	112.228	3e-06	0.000260571
56983	ENSG00000163389	POGLUT1	protein O-glucosyltransferase 1	0.850452	5.32158	112.306	2.99e-06	0.000260571
7022	ENSG00000087510	TFAP2C	transcription factor AP-2 gamma	0.774847	7.52472	112.594	2.96e-06	0.000260571
79567	ENSG00000039523	RIPOR1	RHO family interacting cell polarization regulator 1	-0.930793	5.93468	112.444	2.97e-06	0.000260571
55127	ENSG00000119285	HEATR1	HEAT repeat containing 1	0.851353	6.73322	111.771	3.05e-06	0.000263599
143458	ENSG00000179241	LDLRAD3	low density lipoprotein receptor class A domain containing 3	1.01693	3.62408	111.394	3.09e-06	0.000264755
6397	ENSG00000129657	SEC14L1	SEC14 like lipid binding 1	-0.803638	6.01757	111.38	3.09e-06	0.000264755
1662	ENSG00000178105	DDX10	DEAD-box helicase 10	1.37896	4.9199	110.552	3.18e-06	0.000271549
25987	ENSG00000182704	TSKU	tsukushi, small leucine rich proteoglycan	0.816877	7.90001	110.42	3.2e-06	0.000271549
222183	ENSG00000177679	SRRM3	serine/arginine repetitive matrix 3	-1.4102	3.92214	110.155	3.23e-06	0.000271575
29948	ENSG00000140961	OSGIN1	oxidative stress induced growth inhibitor 1	1.25495	4.5316	110.239	3.22e-06	0.000271575
116986	ENSG00000135439	AGAP2	ArfGAP with GTPase domain, ankyrin repeat and PH domain 2	-0.95044	4.55181	109.16	3.35e-06	0.00028038
3223	ENSG00000197757	HOXC6	homeobox C6	-1.42682	2.44377	108.729	3.41e-06	0.000280889
5420	ENSG00000128567	PODXL	podocalyxin like	0.933664	6.37225	108.644	3.42e-06	0.000280889
65260	ENSG00000162377	COA7	cytochrome c oxidase assembly factor 7	1.00863	5.47885	108.602	3.42e-06	0.000280889
7113	ENSG00000184012	TMPRSS2	transmembrane serine protease 2	-0.750839	6.1043	108.686	3.41e-06	0.000280889
8602	ENSG00000087269	NOP14	NOP14 nucleolar protein	0.75495	6.16352	108.256	3.47e-06	0.00028321
153572	ENSG00000170561	IRX2	iroquois homeobox 2	0.78427	5.82288	107.919	3.51e-06	0.00028416
63977	ENSG00000141956	PRDM15	PR/SET domain 15	0.971821	4.95691	107.939	3.51e-06	0.00028416
594855	ENSG00000213578	CPLX3	complexin 3	3.47936	-0.161097	107.52	3.56e-06	0.000285808
93129	ENSG00000175938	ORAI3	ORAI calcium release-activated calcium modulator 3	-0.915173	5.76813	107.641	3.55e-06	0.000285808
26287	ENSG00000165887	ANKRD2	ankyrin repeat domain 2	3.99696	0.793502	106.724	3.67e-06	0.000290267
2717	ENSG00000102393	GLA	galactosidase alpha	0.868538	5.12735	106.699	3.67e-06	0.000290267
348926	ENSG00000290374	FAM86EP	family with sequence similarity 86, member A pseudogene	1.10606	3.80298	106.629	3.68e-06	0.000290267
5029	ENSG00000175591	P2RY2	purinergic receptor P2Y2	0.830662	6.86607	106.915	3.64e-06	0.000290267
154141	ENSG00000172197	MBOAT1	membrane bound O-acyltransferase domain containing 1	0.967249	5.4051	106.166	3.75e-06	0.000291488
317	ENSG00000120868	APAF1	apoptotic peptidase activating factor 1	-1.14826	4.45342	106.251	3.74e-06	0.000291488
57647	ENSG00000150990	DHX37	DEAH-box helicase 37	0.888487	5.90337	106.227	3.74e-06	0.000291488
9221	ENSG00000166197	NOLC1	nucleolar and coiled-body phosphoprotein 1	0.858765	7.98766	105.81	3.8e-06	0.000294162
144577	ENSG00000174206	KICS2	KICSTOR subunit 2	1.36507	5.40827	105.276	3.88e-06	0.0002989
9543	ENSG00000174498	IGDCC3	immunoglobulin superfamily DCC subclass member 3	-1.02301	4.11878	105.122	3.9e-06	0.000299364
55222	ENSG00000172731	LRRC20	leucine rich repeat containing 20	-1.35781	3.47384	104.39	4.01e-06	0.000306576
140688	ENSG00000197183	NOL4L	nucleolar protein 4 like	-1.9359	4.71846	113.017	4.06e-06	0.00030891
54981	ENSG00000106733	NMRK1	nicotinamide riboside kinase 1	0.96369	4.3344	103.5	4.15e-06	0.000314597
11248	ENSG00000182575	NXPH3	neurexophilin 3	1.98245	2.33686	103.301	4.19e-06	0.00031469
64794	ENSG00000125485	DDX31	DEAD-box helicase 31	0.853377	5.48687	103.272	4.19e-06	0.00031469
388228	ENSG00000188322	SBK1	SH3 domain binding kinase 1	-1.56805	5.82951	107.669	4.25e-06	0.00031607
8818	ENSG00000136908	DPM2	dolichyl-phosphate mannosyltransferase subunit 2, regulatory	0.739243	5.9565	103.031	4.23e-06	0.00031607
10395	ENSG00000164741	DLC1	DLC1 Rho GTPase activating protein	0.835041	6.09048	102.816	4.27e-06	0.000316086
10395	ENSG00000288673	DLC1	DLC1 Rho GTPase activating protein	0.835041	6.09048	102.816	4.27e-06	0.000316086
7057	ENSG00000137801	THBS1	thrombospondin 1	1.11598	8.01737	102.725	4.28e-06	0.000316086
10799	ENSG00000124787	RPP40	ribonuclease P/MRP subunit p40	1.35666	4.2398	102.19	4.37e-06	0.000318775
440193	ENSG00000015133	CCDC88C	coiled-coil domain containing 88C	0.697511	7.27937	102.312	4.35e-06	0.000318775
84864	ENSG00000170854	RIOX2	ribosomal oxygenase 2	1.18439	5.23415	102.219	4.37e-06	0.000318775
64417	ENSG00000151881	TMEM267	transmembrane protein 267	0.832603	5.1516	101.989	4.41e-06	0.000319987
9875	ENSG00000142207	URB1	URB1 ribosome biogenesis homolog	0.814829	6.15518	101.866	4.43e-06	0.000320214
3673	ENSG00000164171	ITGA2	integrin subunit alpha 2	0.959254	6.26647	101.186	4.55e-06	0.00032761
23657	ENSG00000151012	SLC7A11	solute carrier family 7 member 11	1.47929	4.40011	101.043	4.58e-06	0.000328138
9424	ENSG00000099337	KCNK6	potassium two pore domain channel subfamily K member 6	1.24292	6.0022	100.733	4.63e-06	0.000330858
55357	ENSG00000095383	TBC1D2	TBC1 domain family member 2	-0.866268	4.24161	100.457	4.68e-06	0.00033318
2004	ENSG00000111145	ELK3	ETS transcription factor ELK3	-0.974792	4.40792	100.285	4.72e-06	0.000334118
5507	ENSG00000119938	PPP1R3C	protein phosphatase 1 regulatory subunit 3C	-1.21321	5.60212	100.161	4.74e-06	0.000334439
57530	ENSG00000143375	CGN	cingulin	-0.704468	7.42606	100.041	4.76e-06	0.000334704
3664	ENSG00000117595	IRF6	interferon regulatory factor 6	-0.848387	5.09114	99.6012	4.85e-06	0.000339329
3790	ENSG00000170745	KCNS3	potassium voltage-gated channel modifier subfamily S member 3	-1.08037	4.04799	99.4632	4.88e-06	0.000339869
57602	ENSG00000055483	USP36	ubiquitin specific peptidase 36	0.838375	6.12279	99.2351	4.92e-06	0.000340315
83719	ENSG00000090238	YPEL3	yippee like 3	-0.767536	6.2711	99.2919	4.91e-06	0.000340315
2624	ENSG00000179348	GATA2	GATA binding protein 2	-0.858642	5.36811	99.0947	4.95e-06	0.000340912
54498	ENSG00000088826	SMOX	spermine oxidase	1.7011	3.04349	98.3713	5.1e-06	0.000349293
7477	ENSG00000188064	WNT7B	Wnt family member 7B	-0.711473	5.85856	98.3053	5.11e-06	0.000349293
91683	ENSG00000173227	SYT12	synaptotagmin 12	0.741383	6.90575	98.1768	5.14e-06	0.000349769
158763	ENSG00000147256	ARHGAP36	Rho GTPase activating protein 36	3.3225	-0.215356	97.88	5.2e-06	0.000352676
9322	ENSG00000125733	TRIP10	thyroid hormone receptor interactor 10	-0.98942	4.44046	97.5826	5.26e-06	0.000355633
23329	ENSG00000111490	TBC1D30	TBC1 domain family member 30	0.694485	6.35119	97.1796	5.35e-06	0.000359364
400793	ENSG00000239887	C1orf226	chromosome 1 open reading frame 226	1.66219	5.78688	105.295	5.38e-06	0.000359364
81929	ENSG00000085415	SEH1L	SEH1 like nucleoporin	1.03857	5.88074	97.0712	5.38e-06	0.000359364
10106	ENSG00000175215	CTDSP2	CTD small phosphatase 2	-0.726528	7.62764	96.8491	5.42e-06	0.000361
8312	ENSG00000103126	AXIN1	axin 1	0.728248	6.62374	96.6277	5.47e-06	0.00036295
55715	ENSG00000125170	DOK4	docking protein 4	-0.959168	4.08438	96.2153	5.57e-06	0.000367834
55700	ENSG00000116871	MAP7D1	MAP7 domain containing 1	-0.830996	5.83483	95.9379	5.63e-06	0.00037072
2852	ENSG00000164850	GPER1	G protein-coupled estrogen receptor 1	-1.56251	4.72656	95.9463	5.69e-06	0.000371703
400506	ENSG00000103550	KNOP1	lysine rich nucleolar protein 1	0.748884	6.10157	95.7164	5.69e-06	0.000371703
1944	ENSG00000143590	EFNA3	ephrin A3	-1.57049	5.0864	97.7112	5.8e-06	0.000377619
57648	ENSG00000162522	NHSL3	NHS like 3	-0.698421	7.43245	94.6222	5.95e-06	0.000384584
64377	ENSG00000124302	CHST8	carbohydrate sulfotransferase 8	2.64038	0.795083	94.6856	5.94e-06	0.000384584
27113	ENSG00000105327	BBC3	BCL2 binding component 3	-0.82266	5.39588	93.7816	6.17e-06	0.000397096
283576	ENSG00000177108	ZDHHC22	zinc finger DHHC-type palmitoyltransferase 22	3.23272	0.187125	93.4228	6.27e-06	0.000398845
29078	ENSG00000123545	NDUFAF4	NADH:ubiquinone oxidoreductase complex assembly factor 4	1.20395	4.06113	93.4239	6.27e-06	0.000398845
90634	ENSG00000139597	N4BP2L1	NEDD4 binding protein 2 like 1	-1.7548	1.9028	93.5671	6.23e-06	0.000398845
51388	ENSG00000132603	NIP7	nucleolar pre-rRNA processing protein NIP7	1.02761	6.70611	92.8668	6.42e-06	0.000406997
27295	ENSG00000154553	PDLIM3	PDZ and LIM domain 3	2.97765	-0.178096	92.7798	6.44e-06	0.000407055
10785	ENSG00000160193	WDR4	WD repeat domain 4	0.751692	4.9283	92.6753	6.47e-06	0.000407254
114904	ENSG00000133466	C1QTNF6	C1q and TNF related 6	0.839744	7.15524	92.5074	6.52e-06	0.000407254
57539	ENSG00000118965	WDR35	WD repeat domain 35	1.0863	4.42469	92.4372	6.54e-06	0.000407254
9050	ENSG00000152229	PSTPIP2	proline-serine-threonine phosphatase interacting protein 2	0.844996	4.70079	92.4609	6.53e-06	0.000407254
51174	ENSG00000108423	TUBD1	tubulin delta 1	-0.665844	7.06306	92.2769	6.58e-06	0.000408079
54492	ENSG00000214357	NEURL1B	neuralized E3 ubiquitin protein ligase 1B	-0.894154	5.10256	92.1458	6.62e-06	0.000408079
64699	ENSG00000160183	TMPRSS3	transmembrane serine protease 3	1.56379	2.5046	92.1678	6.61e-06	0.000408079
54751	ENSG00000162458	FBLIM1	filamin binding LIM protein 1	-1.10178	3.25028	92.0583	6.65e-06	0.000408197
80256	ENSG00000005238	ATOSB	atos homolog B	-1.26495	3.63913	91.8823	6.7e-06	0.000409895
8568	ENSG00000160214	RRP1	ribosomal RNA processing 1	0.852116	6.04514	91.6905	6.75e-06	0.000411891
2626	ENSG00000136574	GATA4	GATA binding protein 4	4.36109	0.552909	91.443	6.83e-06	0.000414918
2626	ENSG00000285109	GATA4	GATA binding protein 4	4.36109	0.552909	91.443	6.83e-06	0.000414918
153090	ENSG00000136848	DAB2IP	DAB2 interacting protein	-0.711264	6.06643	91.2338	6.89e-06	0.000415849
23076	ENSG00000160208	RRP1B	ribosomal RNA processing 1B	0.758425	6.48538	91.2919	6.87e-06	0.000415849
4772	ENSG00000131196	NFATC1	nuclear factor of activated T cells 1	-1.10786	3.5873	90.6043	7.08e-06	0.000426028
134430	ENSG00000134987	WDR36	WD repeat domain 36	0.886501	5.88918	90.4894	7.12e-06	0.000426727
23493	ENSG00000135547	HEY2	hes related family bHLH transcription factor with YRPW motif 2	2.62828	1.05687	90.0549	7.25e-06	0.000433514
10166	ENSG00000102743	SLC25A15	solute carrier family 25 member 15	0.714886	6.06529	89.8027	7.34e-06	0.0004369
10687	ENSG00000240694	PNMA2	PNMA family member 2	-1.64513	1.79091	89.2912	7.51e-06	0.000440975
200845	ENSG00000168301	KCTD6	potassium channel tetramerization domain containing 6	1.02738	3.3206	89.4009	7.47e-06	0.000440975
84881	ENSG00000165526	RPUSD4	RNA pseudouridine synthase D4	0.846596	3.99837	89.2974	7.5e-06	0.000440975
9143	ENSG00000127561	SYNGR3	synaptogyrin 3	-0.768132	5.13482	89.3094	7.5e-06	0.000440975
9143	ENSG00000291941	SYNGR3	synaptogyrin 3	-0.768132	5.13482	89.3094	7.5e-06	0.000440975
10813	ENSG00000156697	UTP14A	UTP14A small subunit processome component	0.899921	5.77593	89.0666	7.58e-06	0.000443935
65083	ENSG00000165271	NOL6	nucleolar protein 6	0.969453	6.05841	88.5515	7.76e-06	0.000452795
3707	ENSG00000143772	ITPKB	inositol-trisphosphate 3-kinase B	-1.01134	4.67092	88.0461	7.94e-06	0.000461693
23380	ENSG00000266028	SRGAP2	SLIT-ROBO Rho GTPase activating protein 2	-0.788417	5.67174	87.7863	8.03e-06	0.000462741
55003	ENSG00000111845	PAK1IP1	PAK1 interacting protein 1	1.04141	5.3352	87.7402	8.05e-06	0.000462741
55003	ENSG00000285226	PAK1IP1	PAK1 interacting protein 1	1.04141	5.3352	87.7402	8.05e-06	0.000462741
64207	ENSG00000119669	IRF2BPL	interferon regulatory factor 2 binding protein like	-0.659257	7.0624	87.745	8.05e-06	0.000462741
80824	ENSG00000111266	DUSP16	dual specificity phosphatase 16	0.730041	6.42868	87.7052	8.06e-06	0.000462741
80824	ENSG00000280962	DUSP16	dual specificity phosphatase 16	0.730041	6.42868	87.7052	8.06e-06	0.000462741
57478	ENSG00000103404	USP31	ubiquitin specific peptidase 31	1.0075	6.15055	87.5983	8.1e-06	0.000463478
22868	ENSG00000118246	FASTKD2	FAST kinase domains 2	0.701699	6.15945	87.3746	8.18e-06	0.000464224
8800	ENSG00000166821	PEX11A	peroxisomal biogenesis factor 11 alpha	0.877968	4.82507	87.3489	8.19e-06	0.000464224
9533	ENSG00000171453	POLR1C	RNA polymerase I and III subunit C	0.897642	5.61126	87.439	8.16e-06	0.000464224
65059	ENSG00000173166	RAPH1	Ras association (RalGDS/AF-6) and pleckstrin homology domains 1	-0.886565	7.50912	87.1694	8.26e-06	0.000464516
7041	ENSG00000140682	TGFB1I1	transforming growth factor beta 1 induced transcript 1	-1.11569	3.27864	87.1238	8.28e-06	0.000464516
84135	ENSG00000164338	UTP15	UTP15 small subunit processome component	0.813013	4.97199	87.1833	8.25e-06	0.000464516
7903	ENSG00000113532	ST8SIA4	ST8 alpha-N-acetyl-neuraminide alpha-2,8-sialyltransferase 4	-1.14836	5.02341	86.9641	8.34e-06	0.000466425
6821	ENSG00000139531	SUOX	sulfite oxidase	-0.873274	5.06719	86.4045	8.55e-06	0.000475513
9545	ENSG00000105514	RAB3D	RAB3D, member RAS oncogene family	-0.693031	7.26345	86.425	8.55e-06	0.000475513
116071	ENSG00000168062	BATF2	basic leucine zipper ATF-like transcription factor 2	-1.38409	2.93903	86.1761	8.64e-06	0.000479022
51560	ENSG00000154917	RAB6B	RAB6B, member RAS oncogene family	-0.861175	4.18059	86.0097	8.71e-06	0.000479686
54944	NA	LINC01521	long intergenic non-protein coding RNA 1521	-0.782652	4.72975	86.0296	8.7e-06	0.000479686
9915	ENSG00000172379	ARNT2	aryl hydrocarbon receptor nuclear translocator 2	-0.655219	6.32657	85.7057	8.83e-06	0.000484955
53947	ENSG00000128274	A4GALT	alpha 1,4-galactosyltransferase (P blood group)	0.910909	4.81746	85.5133	8.91e-06	0.000486938
85441	ENSG00000130589	HELZ2	helicase with zinc finger 2	-1.07319	8.44668	85.4834	8.92e-06	0.000486938
55646	ENSG00000145220	LYAR	Ly1 antibody reactive	1.25472	5.05466	84.7225	9.25e-06	0.000502957
2353	ENSG00000170345	FOS	Fos proto-oncogene, AP-1 transcription factor subunit	1.01938	5.9187	84.6494	9.28e-06	0.000503123
192134	ENSG00000198488	B3GNT6	UDP-GlcNAc:betaGal beta-1,3-N-acetylglucosaminyltransferase 6	6.26023	-1.29077	84.3057	9.43e-06	0.000508169
2050	ENSG00000196411	EPHB4	EPH receptor B4	-0.807062	7.75468	84.3442	9.41e-06	0.000508169
54855	ENSG00000183508	TENT5C	terminal nucleotidyltransferase 5C	0.790902	4.55622	84.1317	9.51e-06	0.00050952
89797	ENSG00000166833	NAV2	neuron navigator 2	2.50055	3.82454	99.3317	9.51e-06	0.00050952
23201	ENSG00000054965	FAM168A	family with sequence similarity 168 member A	-0.67475	6.57822	83.7475	9.68e-06	0.000512808
7965	ENSG00000106305	AIMP2	aminoacyl tRNA synthetase complex interacting multifunctional protein 2	0.786603	5.39805	83.7805	9.67e-06	0.000512808
81034	ENSG00000164933	SLC25A32	solute carrier family 25 member 32	0.700827	5.86087	83.7263	9.69e-06	0.000512808
83879	ENSG00000144354	CDCA7	cell division cycle associated 7	0.807566	4.61658	83.8444	9.64e-06	0.000512808
29763	ENSG00000165912	PACSIN3	protein kinase C and casein kinase substrate in neurons 3	-0.801576	6.08287	83.4614	9.81e-06	0.00051468
7942	ENSG00000112561	TFEB	transcription factor EB	-1.74222	1.23062	83.4596	9.81e-06	0.00051468
84365	ENSG00000155438	NIFK	nucleolar protein interacting with the FHA domain of MKI67	1.06167	5.79486	83.4623	9.81e-06	0.00051468
6541	ENSG00000139514	SLC7A1	solute carrier family 7 member 1	0.775649	8.0192	83.3936	9.85e-06	0.000514757
138151	ENSG00000148411	NACC2	NACC family member 2	-0.939726	5.78893	83.2653	9.91e-06	0.00051616
784	ENSG00000167535	CACNB3	calcium voltage-gated channel auxiliary subunit beta 3	-0.940248	6.0338	83.2115	9.93e-06	0.00051616
101929780	ENSG00000291005	NBPF25P	NBPF member 25, pseudogene	1.24818	2.48732	83.0021	1e-05	0.000519068
5371	ENSG00000140464	PML	PML nuclear body scaffold	-0.853074	6.52694	82.9698	1e-05	0.000519068
11278	ENSG00000118922	KLF12	KLF transcription factor 12	-1.36622	3.11889	82.3027	1.04e-05	0.000531228
441027	ENSG00000249242	TMEM150C	transmembrane protein 150C	-0.620226	7.04116	82.3487	1.03e-05	0.000531228
6405	ENSG00000001617	SEMA3F	semaphorin 3F	-0.705218	6.6166	82.3434	1.04e-05	0.000531228
54845	ENSG00000104413	ESRP1	epithelial splicing regulatory protein 1	-0.655482	7.7346	82.2402	1.04e-05	0.000531278
130340	ENSG00000152056	AP1S3	adaptor related protein complex 1 subunit sigma 3	0.730554	4.90772	81.7448	1.07e-05	0.000537871
51018	ENSG00000067533	RRP15	ribosomal RNA processing 15 homolog	0.847728	5.70042	81.8247	1.06e-05	0.000537871
7408	ENSG00000125753	VASP	vasodilator stimulated phosphoprotein	-0.685543	6.72524	81.7562	1.06e-05	0.000537871
89846	ENSG00000127084	FGD3	FYVE, RhoGEF and PH domain containing 3	0.88557	4.22199	81.8112	1.06e-05	0.000537871
55701	ENSG00000165801	ARHGEF40	Rho guanine nucleotide exchange factor 40	-1.39358	2.9167	81.1933	1.09e-05	0.000547734
79633	ENSG00000196159	FAT4	FAT atypical cadherin 4	1.53958	3.20665	81.274	1.09e-05	0.000547734
85465	ENSG00000138018	SELENOI	selenoprotein I	0.70129	7.1356	81.2218	1.09e-05	0.000547734
10560	ENSG00000117479	SLC19A2	solute carrier family 19 member 2	0.785542	5.77191	81.0681	1.1e-05	0.000548164
10807	ENSG00000165689	ENTR1	endosome associated trafficking regulator 1	0.731505	6.39358	81.0606	1.1e-05	0.000548164
3087	ENSG00000152804	HHEX	hematopoietically expressed homeobox	-1.44553	1.8624	80.4103	1.14e-05	0.00056428
148545	ENSG00000196427	NBPF4	NBPF member 4	2.05751	2.08965	79.7803	1.17e-05	0.000578743
326624	ENSG00000172794	RAB37	RAB37, member RAS oncogene family	0.981954	3.53091	79.7793	1.17e-05	0.000578743
56975	ENSG00000177706	FAM20C	FAM20C golgi associated secretory pathway kinase	-0.977115	5.07017	79.7256	1.18e-05	0.000578743
56975	ENSG00000281429	FAM20C	FAM20C golgi associated secretory pathway kinase	-0.977115	5.07017	79.7256	1.18e-05	0.000578743
56975	ENSG00000282147	FAM20C	FAM20C golgi associated secretory pathway kinase	-0.977115	5.07017	79.7256	1.18e-05	0.000578743
56975	ENSG00000288499	FAM20C	FAM20C golgi associated secretory pathway kinase	-0.977115	5.07017	79.7256	1.18e-05	0.000578743
26354	ENSG00000163938	GNL3	G protein nucleolar 3	0.619431	6.84365	79.6476	1.18e-05	0.000579361
23082	ENSG00000148840	PPRC1	PPARG related coactivator 1	0.844698	6.23914	79.5447	1.19e-05	0.0005807
347902	ENSG00000139211	AMIGO2	adhesion molecule with Ig like domain 2	-0.906326	7.14528	78.8153	1.23e-05	0.000600506
54800	ENSG00000114796	KLHL24	kelch like family member 24	-0.907063	5.1352	78.454	1.25e-05	0.000609781
25819	ENSG00000151014	NOCT	nocturnin	0.772257	4.35199	78.0646	1.28e-05	0.00062013
55616	ENSG00000088280	ASAP3	ArfGAP with SH3 domain, ankyrin repeat and PH domain 3	-0.846176	4.48478	77.9433	1.29e-05	0.000622221
55616	ENSG00000282854	ASAP3	ArfGAP with SH3 domain, ankyrin repeat and PH domain 3	-0.846176	4.48478	77.9433	1.29e-05	0.000622221
126375	ENSG00000180884	ZNF792	zinc finger protein 792	-1.13979	2.78316	77.7837	1.3e-05	0.000625538
10322	ENSG00000135632	SMYD5	SMYD family member 5	0.750744	5.27979	77.4832	1.32e-05	0.000631132
54906	ENSG00000108021	TASOR2	transcription activation suppressor family member 2	1.01196	7.93514	77.4462	1.32e-05	0.000631132
8303	ENSG00000184602	SNN	stannin	-0.931524	4.82476	77.5227	1.31e-05	0.000631132
1717	ENSG00000172893	DHCR7	7-dehydrocholesterol reductase	0.655987	8.24786	77.1399	1.34e-05	0.000632409
27198	ENSG00000196917	HCAR1	hydroxycarboxylic acid receptor 1	-1.1375	4.28921	77.2625	1.33e-05	0.000632409
5083	ENSG00000198807	PAX9	paired box 9	1.00387	3.16257	77.1769	1.34e-05	0.000632409
55341	ENSG00000041802	LSG1	large 60S subunit nuclear export GTPase 1	0.645178	6.2437	77.0355	1.35e-05	0.000632409
661	ENSG00000168495	POLR3D	RNA polymerase III subunit D	0.699973	5.41651	77.3427	1.33e-05	0.000632409
84128	ENSG00000115368	WDR75	WD repeat domain 75	0.774089	6.24346	77.0661	1.34e-05	0.000632409
84451	ENSG00000143674	MAP3K21	mitogen-activated protein kinase kinase kinase 21	0.85124	4.83915	77.1241	1.34e-05	0.000632409
121642	ENSG00000189046	ALKBH2	alkB homolog 2, alpha-ketoglutarate dependent dioxygenase	0.978282	4.51162	76.9359	1.35e-05	0.000632793
27443	ENSG00000099954	CECR2	CECR2 histone acetyl-lysine reader	-1.12271	4.04112	76.7639	1.37e-05	0.000632793
401934	ENSG00000237330	RNF223	ring finger protein 223	0.848956	4.87111	76.785	1.36e-05	0.000632793
56902	ENSG00000115946	PNO1	partner of NOB1 homolog	1.01292	5.75934	76.8264	1.36e-05	0.000632793
6256	ENSG00000186350	RXRA	retinoid X receptor alpha	-0.646119	8.06987	76.8566	1.36e-05	0.000632793
165215	ENSG00000144369	FAM171B	family with sequence similarity 171 member B	-1.20433	5.44956	76.6177	1.38e-05	0.000635878
23560	ENSG00000107937	GTPBP4	GTP binding protein 4	0.696003	8.06843	76.335	1.4e-05	0.000642918
79007	ENSG00000003249	DBNDD1	dysbindin domain containing 1	-0.774818	7.34753	76.3013	1.4e-05	0.000642918
342527	ENSG00000188176	SMTNL2	smoothelin like 2	1.65818	2.47839	76.1006	1.41e-05	0.000645734
57787	ENSG00000007047	MARK4	microtubule affinity regulating kinase 4	-1.07006	4.78156	76.0217	1.42e-05	0.000645734
7164	ENSG00000111907	TPD52L1	TPD52 like 1	1.07913	7.85171	76.1301	1.41e-05	0.000645734
9968	ENSG00000184634	MED12	mediator complex subunit 12	-0.656429	5.32647	76.0147	1.42e-05	0.000645734
100287482	ENSG00000240204	SMKR1	small lysine rich protein 1	1.06516	3.122	75.9249	1.43e-05	0.000647062
56704	ENSG00000104369	JPH1	junctophilin 1	0.944689	4.32018	75.8683	1.43e-05	0.000647285
128272	ENSG00000142632	ARHGEF19	Rho guanine nucleotide exchange factor 19	-0.9262	3.82282	74.8882	1.5e-05	0.000674228
128272	ENSG00000291381	ARHGEF19	Rho guanine nucleotide exchange factor 19	-0.9262	3.82282	74.8882	1.5e-05	0.000674228
29889	ENSG00000134697	GNL2	G protein nucleolar 2	0.682569	5.82228	74.8899	1.5e-05	0.000674228
7764	ENSG00000171940	ZNF217	zinc finger protein 217	-0.991304	9.78692	74.9526	1.5e-05	0.000674228
8816	ENSG00000139990	DCAF5	DDB1 and CUL4 associated factor 5	-0.591459	6.96579	74.9674	1.5e-05	0.000674228
7421	ENSG00000111424	VDR	vitamin D receptor	0.731335	4.95601	74.8304	1.51e-05	0.000674552
4099	ENSG00000105695	MAG	myelin associated glycoprotein	2.80716	-0.127432	74.6101	1.53e-05	0.000680663
54680	ENSG00000117174	ZNHIT6	zinc finger HIT-type containing 6	0.987559	4.69115	74.4522	1.54e-05	0.000684603
1822	ENSG00000111676	ATN1	atrophin 1	-0.631132	6.5725	74.3305	1.55e-05	0.000687267
3760	ENSG00000162989	KCNJ3	potassium inwardly rectifying channel subfamily J member 3	-1.09233	5.35452	74.2655	1.55e-05	0.000687891
84154	ENSG00000197498	RPF2	ribosome production factor 2 homolog	0.939695	5.22799	74.1439	1.56e-05	0.000690586
3491	ENSG00000142871	CCN1	cellular communication network factor 1	0.967528	4.21119	73.9252	1.58e-05	0.000693399
646762	NA	LOC646762	uncharacterized LOC646762	1.15313	4.23053	73.9714	1.58e-05	0.000693399
692099	ENSG00000244026	FAM86DP	family with sequence similarity 86 member D, pseudogene	0.875027	3.73649	74.0083	1.58e-05	0.000693399
692099	ENSG00000288323	FAM86DP	family with sequence similarity 86 member D, pseudogene	0.875027	3.73649	74.0083	1.58e-05	0.000693399
692099	ENSG00000291223	FAM86DP	family with sequence similarity 86 member D, pseudogene	0.875027	3.73649	74.0083	1.58e-05	0.000693399
857	ENSG00000105974	CAV1	caveolin 1	1.51203	3.42037	73.8067	1.59e-05	0.000696033
51762	ENSG00000166128	RAB8B	RAB8B, member RAS oncogene family	-0.82726	4.43301	73.49	1.62e-05	0.0007061
1942	ENSG00000169242	EFNA1	ephrin A1	-0.695931	6.58908	73.0965	1.65e-05	0.000718471
9413	ENSG00000135063	ENTREP1	endosomal transmembrane epsin interactor 1	2.50301	0.221724	73.0721	1.66e-05	0.000718471
1906	ENSG00000078401	EDN1	endothelin 1	1.2155	3.06087	72.9977	1.66e-05	0.000719565
84343	ENSG00000163755	HPS3	HPS3 biogenesis of lysosomal organelles complex 2 subunit 1	-0.678986	7.01188	72.7886	1.68e-05	0.000725898
440503	ENSG00000214456	PLIN5	perilipin 5	1.68688	2.46735	72.67	1.69e-05	0.000728755
25959	ENSG00000197256	KANK2	KN motif and ankyrin repeat domains 2	-0.652371	5.81412	72.5995	1.7e-05	0.000729335
348093	ENSG00000166831	RBPMS2	RNA binding protein, mRNA processing factor 2	-1.62526	1.48919	72.5644	1.7e-05	0.000729335
200205	ENSG00000181873	IBA57	iron-sulfur cluster assembly factor IBA57	0.787214	4.1436	72.3771	1.72e-05	0.000729624
29104	ENSG00000156239	N6AMT1	N-6 adenine-specific DNA methyltransferase 1	1.02363	3.54892	72.4285	1.71e-05	0.000729624
53342	ENSG00000172458	IL17D	interleukin 17D	0.849407	4.79708	72.5003	1.71e-05	0.000729624
6059	ENSG00000164163	ABCE1	ATP binding cassette subfamily E member 1	0.828874	7.17289	72.4179	1.72e-05	0.000729624
56920	ENSG00000010319	SEMA3G	semaphorin 3G	3.70028	1.00964	72.7527	1.72e-05	0.000730188
57504	ENSG00000057935	MTA3	metastasis associated 1 family member 3	-0.65225	6.34417	72.0377	1.75e-05	0.000739583
23677	ENSG00000130147	SH3BP4	SH3 domain binding protein 4	-0.609143	6.81334	71.8922	1.77e-05	0.000743659
9314	ENSG00000136826	KLF4	KLF transcription factor 4	0.826166	6.44073	71.8289	1.77e-05	0.000744438
4983	ENSG00000079482	OPHN1	oligophrenin 1	0.828869	3.85875	71.6902	1.78e-05	0.000748292
113791	ENSG00000100100	PIK3IP1	phosphoinositide-3-kinase interacting protein 1	-0.996539	4.38287	71.599	1.79e-05	0.000750231
26959	ENSG00000105856	HBP1	HMG-box transcription factor 1	-0.659654	5.79305	71.5407	1.8e-05	0.000750835
26959	ENSG00000283847	HBP1	HMG-box transcription factor 1	-0.659654	5.79305	71.5407	1.8e-05	0.000750835
8309	ENSG00000168306	ACOX2	acyl-CoA oxidase 2	2.3593	0.503467	71.4942	1.8e-05	0.000750958
1591	ENSG00000019186	CYP24A1	cytochrome P450 family 24 subfamily A member 1	3.20377	1.39324	71.7993	1.82e-05	0.000755825
57513	ENSG00000177303	CASKIN2	CASK interacting protein 2	-0.601668	6.14898	71.3197	1.82e-05	0.000755825
23678	ENSG00000104205	SGK3	serum/glucocorticoid regulated kinase family member 3	2.34506	0.0370298	71.0868	1.84e-05	0.000762483
10611	ENSG00000163110	PDLIM5	PDZ and LIM domain 5	0.982142	4.62897	70.9882	1.85e-05	0.000764045
56931	ENSG00000141994	DUS3L	dihydrouridine synthase 3 like	0.973025	4.65702	70.9641	1.86e-05	0.000764045
8660	ENSG00000185950	IRS2	insulin receptor substrate 2	0.994612	5.52611	70.8128	1.87e-05	0.000768634
348180	ENSG00000174177	CTU2	cytosolic thiouridylase subunit 2	0.688386	4.72413	70.7051	1.88e-05	0.000769715
3717	ENSG00000096968	JAK2	Janus kinase 2	1.64933	5.30641	79.6509	1.89e-05	0.000769715
50515	ENSG00000171310	CHST11	carbohydrate sulfotransferase 11	0.735213	5.02999	70.6667	1.89e-05	0.000769715
23580	ENSG00000179604	CDC42EP4	CDC42 effector protein 4	-0.681511	5.70842	70.5833	1.9e-05	0.000770092
3757	ENSG00000055118	KCNH2	potassium voltage-gated channel subfamily H member 2	-1.34315	3.83654	70.568	1.9e-05	0.000770092
3964	ENSG00000116977	LGALS8	galectin 8	-0.683041	6.56483	70.5189	1.9e-05	0.000770407
23616	ENSG00000100092	SH3BP1	SH3 domain binding protein 1	-1.16885	3.08571	70.4024	1.92e-05	0.00077183
54984	ENSG00000254093	PINX1	PIN2 (TERF1) interacting telomerase inhibitor 1	1.04044	3.13046	70.4276	1.91e-05	0.00077183
54984	ENSG00000258724	PINX1	PIN2 (TERF1) interacting telomerase inhibitor 1	1.04044	3.13046	70.4276	1.91e-05	0.00077183
54984	ENSG00000284764	PINX1	PIN2 (TERF1) interacting telomerase inhibitor 1	1.04044	3.13046	70.4276	1.91e-05	0.00077183
148398	ENSG00000187634	SAMD11	sterile alpha motif domain containing 11	-0.866717	3.88827	70.3246	1.92e-05	0.000772704
27309	ENSG00000109445	ZNF330	zinc finger protein 330	0.704063	5.42431	70.2464	1.93e-05	0.000772704
54345	ENSG00000203883	SOX18	SRY-box transcription factor 18	-1.57253	1.4203	70.2173	1.94e-05	0.000772704
6714	ENSG00000197122	SRC	SRC proto-oncogene, non-receptor tyrosine kinase	-0.708304	5.41154	70.2467	1.93e-05	0.000772704
6714	ENSG00000291971	SRC	SRC proto-oncogene, non-receptor tyrosine kinase	-0.708304	5.41154	70.2467	1.93e-05	0.000772704
152485	ENSG00000151612	ZNF827	zinc finger protein 827	-1.42943	2.9481	70.1522	1.94e-05	0.000773745
51154	ENSG00000053372	MRTO4	MRT4 homolog, ribosome maturation factor	0.811773	5.5549	69.9932	1.96e-05	0.000777093
57701	ENSG00000167566	NCKAP5L	NCK associated protein 5 like	-0.721064	5.55487	69.9943	1.96e-05	0.000777093
57520	ENSG00000138411	HECW2	HECT, C2 and WW domain containing E3 ubiquitin protein ligase 2	0.929891	5.59335	69.8753	1.97e-05	0.000780455
10287	ENSG00000171700	RGS19	regulator of G protein signaling 19	-0.757643	4.68288	69.5396	2.01e-05	0.000791667
25885	ENSG00000068654	POLR1A	RNA polymerase I subunit A	0.667205	6.88001	69.5449	2.01e-05	0.000791667
10184	ENSG00000145685	LHFPL2	LHFPL tetraspan subfamily member 2	-0.773532	4.85409	69.4444	2.02e-05	0.000792352
23586	ENSG00000107201	RIGI	RNA sensor RIG-I	-0.863581	6.44849	69.4553	2.02e-05	0.000792352
129642	ENSG00000143797	MBOAT2	membrane bound O-acyltransferase domain containing 2	-0.593678	6.19629	69.2321	2.04e-05	0.000796598
3706	ENSG00000137825	ITPKA	inositol-trisphosphate 3-kinase A	-1.50801	1.50071	69.2824	2.04e-05	0.000796598
79962	ENSG00000178401	DNAJC22	DnaJ heat shock protein family (Hsp40) member C22	-0.977903	5.04952	69.2303	2.05e-05	0.000796598
51291	ENSG00000089639	GMIP	GEM interacting protein	-0.714372	4.97631	69.1907	2.05e-05	0.000796609
79834	ENSG00000173517	PEAK1	pseudopodium enriched atypical kinase 1	-0.774381	5.85914	69.0409	2.07e-05	0.000801584
56987	ENSG00000114439	BBX	BBX high mobility group box domain containing	-0.876262	6.4085	68.7506	2.1e-05	0.000813038
55540	ENSG00000056736	IL17RB	interleukin 17 receptor B	0.904806	3.64599	68.7016	2.11e-05	0.000813508
10461	ENSG00000153208	MERTK	MER proto-oncogene, tyrosine kinase	1.62487	1.82301	68.4957	2.13e-05	0.000821255
5241	ENSG00000082175	PGR	progesterone receptor	2.30213	4.66995	87.5707	2.14e-05	0.000822248
3660	ENSG00000168310	IRF2	interferon regulatory factor 2	-0.857561	4.58929	68.0699	2.18e-05	0.000837731
5471	ENSG00000128059	PPAT	phosphoribosyl pyrophosphate amidotransferase	0.731076	6.12737	67.981	2.2e-05	0.000840161
23102	ENSG00000167202	TBC1D2B	TBC1 domain family member 2B	-0.723436	5.88798	67.6208	2.24e-05	0.000855817
115	ENSG00000162104	ADCY9	adenylate cyclase 9	0.802303	6.63114	67.2586	2.29e-05	0.000867481
1303	ENSG00000111799	COL12A1	collagen type XII alpha 1 chain	1.47221	6.01641	74.87	2.29e-05	0.000867481
26011	ENSG00000149256	TENM4	teneurin transmembrane protein 4	1.65865	3.08428	67.198	2.3e-05	0.000867481
29998	ENSG00000063169	BICRA	BRD4 interacting chromatin remodeling complex associated protein	-0.826134	4.56874	67.2312	2.29e-05	0.000867481
51175	ENSG00000074935	TUBE1	tubulin epsilon 1	1.19192	2.97723	67.2715	2.29e-05	0.000867481
283551	ENSG00000214900	LINC01588	long intergenic non-protein coding RNA 1588	1.40289	3.13996	67.0988	2.31e-05	0.000869762
602	ENSG00000069399	BCL3	BCL3 transcription coactivator	-0.853642	5.25188	67.0784	2.31e-05	0.000869762
54955	ENSG00000116922	AIRIM	AFG2 interacting ribosome maturation factor	0.745714	4.23559	66.9503	2.33e-05	0.000874361
144097	ENSG00000168005	SPINDOC	spindlin interactor and repressor of chromatin binding	-0.717726	5.34962	66.7942	2.35e-05	0.000878559
23481	ENSG00000100029	PES1	pescadillo ribosomal biogenesis factor 1	0.699989	6.84755	66.7997	2.35e-05	0.000878559
63897	ENSG00000068097	HEATR6	HEAT repeat containing 6	0.616496	8.68125	66.7208	2.36e-05	0.000880444
388403	ENSG00000175155	YPEL2	yippee like 2	-0.690491	5.16517	66.4631	2.4e-05	0.000889977
90233	ENSG00000204519	ZNF551	zinc finger protein 551	0.870409	3.74329	66.4922	2.39e-05	0.000889977
5914	ENSG00000131759	RARA	retinoic acid receptor alpha	0.769432	6.99252	66.1867	2.44e-05	0.000902561
23087	ENSG00000104228	TRIM35	tripartite motif containing 35	0.70814	4.43848	65.9348	2.47e-05	0.000909568
23176	ENSG00000164402	SEPTIN8	septin 8	-0.581559	6.50185	65.8746	2.48e-05	0.000909568
29993	ENSG00000124507	PACSIN1	protein kinase C and casein kinase substrate in neurons 1	-0.777927	4.26674	65.8405	2.49e-05	0.000909568
653	ENSG00000112175	BMP5	bone morphogenetic protein 5	2.46676	0.192957	65.8605	2.48e-05	0.000909568
7832	ENSG00000159388	BTG2	BTG anti-proliferation factor 2	-1.21414	5.80833	67.5465	2.47e-05	0.000909568
81628	ENSG00000166925	TSC22D4	TSC22 domain family member 4	-0.740103	5.65821	65.9588	2.47e-05	0.000909568
10329	ENSG00000118600	RXYLT1	ribitol xylosyltransferase 1	0.923842	5.09669	65.7881	2.49e-05	0.000910482
124454	ENSG00000103356	EARS2	glutamyl-tRNA synthetase 2, mitochondrial	0.657376	6.24269	65.7189	2.5e-05	0.000912305
79152	ENSG00000103089	FA2H	fatty acid 2-hydroxylase	-0.94165	4.20022	65.4397	2.54e-05	0.000925546
254065	ENSG00000165288	BRWD3	bromodomain and WD repeat domain containing 3	-1.17158	4.04771	65.3637	2.56e-05	0.000927797
56155	ENSG00000121101	TEX14	testis expressed 14, intercellular bridge forming factor	1.28671	4.4955	65.45	2.56e-05	0.000929027
57727	ENSG00000124160	NCOA5	nuclear receptor coactivator 5	0.729335	6.34036	65.1708	2.59e-05	0.000934607
9933	ENSG00000080608	PUM3	pumilio RNA binding family member 3	0.965194	5.13564	65.0751	2.6e-05	0.000938003
116113	ENSG00000137166	FOXP4	forkhead box P4	-0.703684	6.57868	64.9651	2.62e-05	0.000942226
114991	ENSG00000157657	ZNF618	zinc finger protein 618	-0.817637	5.43851	64.8874	2.63e-05	0.000942273
23269	ENSG00000174197	MGA	MAX dimerization protein MGA	0.746388	7.19137	64.8273	2.64e-05	0.000942273
6016	ENSG00000143622	RIT1	Ras like without CAAX 1	-0.603836	5.3024	64.8485	2.64e-05	0.000942273
91373	ENSG00000197355	UAP1L1	UDP-N-acetylglucosamine pyrophosphorylase 1 like 1	-1.02011	5.71575	64.8466	2.64e-05	0.000942273
100101490	ENSG00000101898	MCTS2	MCTS family member 2	0.839093	3.46849	64.643	2.67e-05	0.000942992
23767	ENSG00000125848	FLRT3	fibronectin leucine rich transmembrane protein 3	0.988385	3.35118	64.7317	2.65e-05	0.000942992
4281	ENSG00000101871	MID1	midline 1	1.60752	1.12661	64.6518	2.67e-05	0.000942992
54620	ENSG00000099364	FBXL19	F-box and leucine rich repeat protein 19	-0.612109	6.90361	64.6116	2.67e-05	0.000942992
6722	ENSG00000112658	SRF	serum response factor	0.665317	6.55705	64.7563	2.65e-05	0.000942992
92689	ENSG00000197712	FAM114A1	family with sequence similarity 114 member A1	-0.942843	4.41348	64.6793	2.66e-05	0.000942992
5453	ENSG00000185668	POU3F1	POU class 3 homeobox 1	4.9391	-0.671944	64.5714	2.68e-05	0.000943365
64859	ENSG00000173559	NABP1	nucleic acid binding protein 1	1.20759	4.76731	64.4595	2.7e-05	0.000947932
23189	ENSG00000107104	KANK1	KN motif and ankyrin repeat domains 1	0.852905	4.39489	64.3156	2.72e-05	0.000954126
6307	ENSG00000052802	MSMO1	methylsterol monooxygenase 1	0.667118	7.17083	64.2784	2.73e-05	0.000954355
6781	ENSG00000159167	STC1	stanniocalcin 1	0.659146	6.94395	64.1854	2.74e-05	0.000957796
51313	ENSG00000164125	GASK1B	golgi associated kinase 1B	1.01491	3.33705	64.0712	2.76e-05	0.000962493
118672	ENSG00000179988	PSTK	phosphoseryl-tRNA kinase	1.43832	1.51227	63.8884	2.79e-05	0.000965527
3131	ENSG00000108924	HLF	HLF transcription factor, PAR bZIP family member	1.6308	1.29536	63.9846	2.78e-05	0.000965527
4744	ENSG00000100285	NEFH	neurofilament heavy chain	3.22156	-0.825651	63.8881	2.79e-05	0.000965527
653149	ENSG00000186086	NBPF6	NBPF member 6	2.3533	0.385529	63.9417	2.78e-05	0.000965527
55239	ENSG00000087263	OGFOD1	2-oxoglutarate and iron dependent oxygenase domain containing 1	0.73895	5.658	63.7758	2.81e-05	0.000969571
7371	ENSG00000143179	UCK2	uridine-cytidine kinase 2	0.651666	6.26177	63.7217	2.82e-05	0.000969571
8202	ENSG00000124151	NCOA3	nuclear receptor coactivator 3	-0.775737	11.1187	63.7328	2.82e-05	0.000969571
50628	ENSG00000179409	GEMIN4	gem nuclear organelle associated protein 4	0.714883	6.12001	63.627	2.84e-05	0.000971462
55686	ENSG00000118242	MREG	melanoregulin	0.654898	7.60575	63.6251	2.84e-05	0.000971462
84315	ENSG00000164077	MON1A	MON1 homolog A, secretory trafficking associated	1.0242	3.07204	63.5323	2.85e-05	0.00097505
100125556	ENSG00000291071	FAM86JP	family with sequence similarity 86, member A pseudogene	1.08855	2.56198	63.4103	2.87e-05	0.000980398
10385	ENSG00000124508	BTN2A2	butyrophilin subfamily 2 member A2	-1.2033	3.38594	63.2518	2.9e-05	0.000987991
89853	ENSG00000196814	MVB12B	multivesicular body subunit 12B	-0.970678	3.15976	63.0185	2.94e-05	0.00100022
65998	ENSG00000188070	ZFTA	zinc finger translocation associated	-1.47219	3.52283	62.984	2.95e-05	0.00100041
85446	ENSG00000136367	ZFHX2	zinc finger homeobox 2	-1.45697	3.49306	62.9209	2.96e-05	0.00100234
23034	ENSG00000020577	SAMD4A	sterile alpha motif domain containing 4A	0.76357	5.30597	62.8704	2.97e-05	0.0010026
5916	ENSG00000172819	RARG	retinoic acid receptor gamma	-0.77833	6.9192	62.854	2.97e-05	0.0010026
9136	ENSG00000114767	RRP9	ribosomal RNA processing 9, U3 small nucleolar RNA binding protein	0.808965	5.04949	62.8084	2.98e-05	0.00100348
23250	ENSG00000068650	ATP11A	ATPase phospholipid transporting 11A	0.90403	6.83588	62.6019	3.02e-05	0.00101435
51602	ENSG00000055044	NOP58	NOP58 ribonucleoprotein	0.770527	7.14323	62.4783	3.04e-05	0.00101821
5373	ENSG00000140650	PMM2	phosphomannomutase 2	0.693843	6.23661	62.4978	3.04e-05	0.00101821
169714	ENSG00000165661	QSOX2	quiescin sulfhydryl oxidase 2	0.843128	5.8423	62.4012	3.06e-05	0.00102112
10507	ENSG00000187764	SEMA4D	semaphorin 4D	-1.11609	4.51305	62.3495	3.07e-05	0.00102244
154796	ENSG00000126016	AMOT	angiomotin	-0.705971	3.92875	62.2929	3.08e-05	0.00102265
92345	ENSG00000145414	NAF1	nuclear assembly factor 1 ribonucleoprotein	0.844652	4.95647	62.2848	3.08e-05	0.00102265
6559	ENSG00000070915	SLC12A3	solute carrier family 12 member 3	3.36189	-0.710032	62.075	3.12e-05	0.00103407
10401	ENSG00000131788	PIAS3	protein inhibitor of activated STAT 3	-0.680952	6.65851	61.9443	3.15e-05	0.00104053
56603	ENSG00000003137	CYP26B1	cytochrome P450 family 26 subfamily B member 1	2.34717	2.19292	62.7889	3.17e-05	0.00104535
23351	ENSG00000100441	KHNYN	KH and NYN domain containing	-0.656701	7.06902	61.556	3.22e-05	0.00106017
58489	ENSG00000136379	ABHD17C	abhydrolase domain containing 17C, depalmitoylase	0.622828	6.63138	61.5347	3.23e-05	0.00106017
8522	ENSG00000007237	GAS7	growth arrest specific 7	3.41641	-0.359	61.5236	3.23e-05	0.00106017
114879	ENSG00000021762	OSBPL5	oxysterol binding protein like 5	-0.747852	3.73547	61.244	3.29e-05	0.00107341
169200	ENSG00000180694	TMEM64	transmembrane protein 64	0.939516	8.0689	61.2808	3.28e-05	0.00107341
22856	ENSG00000131873	CHSY1	chondroitin sulfate synthase 1	0.572086	6.23688	61.1598	3.3e-05	0.00107341
23361	ENSG00000102870	ZNF629	zinc finger protein 629	-0.613724	6.74399	61.1475	3.31e-05	0.00107341
72	ENSG00000163017	ACTG2	actin gamma 2, smooth muscle	1.16033	3.20688	61.1868	3.3e-05	0.00107341
9830	ENSG00000106785	TRIM14	tripartite motif containing 14	-0.540167	7.15116	61.1633	3.3e-05	0.00107341
57198	ENSG00000143515	ATP8B2	ATPase phospholipid transporting 8B2	-0.603268	6.50764	61.1009	3.32e-05	0.00107435
90784	NA	NA	NA	0.825627	4.15308	61.075	3.32e-05	0.00107435
79966	ENSG00000145284	SCD5	stearoyl-CoA desaturase 5	-0.938032	4.72354	61.0295	3.33e-05	0.00107544
91947	ENSG00000140450	ARRDC4	arrestin domain containing 4	0.561442	6.02651	60.9874	3.34e-05	0.00107632
283212	ENSG00000149243	KLHL35	kelch like family member 35	1.16145	2.56107	60.8449	3.37e-05	0.00108405
4854	ENSG00000074181	NOTCH3	notch receptor 3	-1.02308	7.79853	60.7245	3.39e-05	0.00109033
53349	ENSG00000165861	ZFYVE1	zinc finger FYVE-type containing 1	-0.702723	5.4157	60.5923	3.42e-05	0.00109748
2065	ENSG00000065361	ERBB3	erb-b2 receptor tyrosine kinase 3	-0.738672	8.38484	60.4897	3.45e-05	0.00110263
11054	ENSG00000060491	OGFR	opioid growth factor receptor	-0.593812	7.18146	60.3228	3.48e-05	0.00111235
155185	ENSG00000174945	AMZ1	archaelysin family metallopeptidase 1	1.15785	4.97789	60.268	3.52e-05	0.00112327
151887	ENSG00000091986	CCDC80	coiled-coil domain containing 80	1.44517	1.68562	60.0975	3.53e-05	0.00112432
55917	ENSG00000143079	CTTNBP2NL	CTTNBP2 N-terminal like	-0.867255	4.91659	60.0694	3.54e-05	0.00112432
26043	ENSG00000163960	UBXN7	UBX domain protein 7	-0.641522	5.52844	59.9984	3.56e-05	0.00112634
8495	ENSG00000166387	PPFIBP2	PPFIA binding protein 2	-0.8124	3.4426	59.9849	3.56e-05	0.00112634
79935	ENSG00000105219	CCNP	cyclin P	1.16671	1.85928	59.9095	3.58e-05	0.00112974
100101467	ENSG00000186814	ZSCAN30	zinc finger and SCAN domain containing 30	-1.06161	3.42673	59.859	3.59e-05	0.00113137
25837	ENSG00000167964	RAB26	RAB26, member RAS oncogene family	-0.807559	4.46941	59.8268	3.59e-05	0.00113167
196483	ENSG00000118894	EEF2KMT	eukaryotic elongation factor 2 lysine methyltransferase	0.8305	4.19494	59.6895	3.63e-05	0.00113964
10056	ENSG00000116120	FARSB	phenylalanyl-tRNA synthetase subunit beta	0.648909	6.30871	59.6282	3.64e-05	0.00114209
9516	ENSG00000189067	LITAF	lipopolysaccharide induced TNF factor	-0.609872	7.21579	59.468	3.68e-05	0.00115186
90525	ENSG00000138606	SHF	Src homology 2 domain containing F	-1.36977	2.19405	59.4173	3.69e-05	0.00115357
84749	ENSG00000135093	USP30	ubiquitin specific peptidase 30	-0.734912	3.86656	59.2234	3.74e-05	0.00116603
23052	ENSG00000149218	ENDOD1	endonuclease domain containing 1	0.592665	5.86933	59.1583	3.75e-05	0.00116681
51222	ENSG00000165804	ZNF219	zinc finger protein 219	-0.565031	6.33206	59.1797	3.75e-05	0.00116681
112849	ENSG00000126790	L3HYPDH	trans-L-3-hydroxyproline dehydratase	1.17911	3.8656	59.0606	3.78e-05	0.00117214
23761	ENSG00000241878	PISD	phosphatidylserine decarboxylase	0.564027	6.65721	59.0243	3.79e-05	0.00117282
10622	ENSG00000113356	POLR3G	RNA polymerase III subunit G	1.08027	2.80934	58.9534	3.8e-05	0.00117451
22978	ENSG00000076685	NT5C2	5'-nucleotidase, cytosolic II	0.58717	7.04808	58.9479	3.8e-05	0.00117451
127002	ENSG00000162650	ATXN7L2	ataxin 7 like 2	0.997514	3.24126	58.8844	3.82e-05	0.00117729
23371	ENSG00000111077	TNS2	tensin 2	-0.983968	4.18647	58.8472	3.83e-05	0.0011776
283149	ENSG00000186174	BCL9L	BCL9 like	-0.668781	8.21532	58.7851	3.84e-05	0.0011776
7753	ENSG00000166261	ZNF202	zinc finger protein 202	0.884286	3.76455	58.7945	3.84e-05	0.0011776
9770	ENSG00000101265	RASSF2	Ras association domain family member 2	-1.20084	3.01511	58.7729	3.85e-05	0.0011776
1958	ENSG00000120738	EGR1	early growth response 1	0.877081	5.3686	58.6955	3.87e-05	0.00118149
54438	ENSG00000145990	GFOD1	Gfo/Idh/MocA-like oxidoreductase domain containing 1	0.753766	4.05885	58.6233	3.89e-05	0.001185
79730	ENSG00000179299	NSUN7	NOP2/Sun RNA methyltransferase family member 7	-0.811253	3.31265	58.5648	3.9e-05	0.00118747
55450	ENSG00000162545	CAMK2N1	calcium/calmodulin dependent protein kinase II inhibitor 1	-0.775328	5.9283	58.4938	3.92e-05	0.00119093
93436	ENSG00000105676	ARMC6	armadillo repeat containing 6	0.773751	5.606	58.4262	3.94e-05	0.00119414
152519	ENSG00000163293	NIPAL1	NIPA like domain containing 1	0.718867	3.85771	58.3617	3.95e-05	0.00119516
54910	ENSG00000168758	SEMA4C	semaphorin 4C	-0.932718	8.13088	58.3605	3.95e-05	0.00119516
192670	ENSG00000134698	AGO4	argonaute RISC component 4	-1.30441	4.12235	58.3902	3.98e-05	0.00120028
57688	ENSG00000130449	ZSWIM6	zinc finger SWIM-type containing 6	0.763053	4.65446	58.1852	4e-05	0.00120483
6574	ENSG00000144136	SLC20A1	solute carrier family 20 member 1	0.580451	6.75847	58.1502	4.01e-05	0.00120553
81844	ENSG00000169871	TRIM56	tripartite motif containing 56	-0.704653	6.62126	58.1131	4.02e-05	0.0012064
27063	ENSG00000148677	ANKRD1	ankyrin repeat domain 1	2.44842	-0.13621	58.0742	4.03e-05	0.00120732
90378	ENSG00000141858	SAMD1	sterile alpha motif domain containing 1	-0.59482	5.74245	58.0497	4.03e-05	0.00120732
90378	ENSG00000288488	SAMD1	sterile alpha motif domain containing 1	-0.59482	5.74245	58.0497	4.03e-05	0.00120732
57655	ENSG00000089351	GRAMD1A	GRAM domain containing 1A	-0.711383	5.70049	57.9373	4.06e-05	0.00121422
55299	ENSG00000113460	BRIX1	biogenesis of ribosomes BRX1	0.834559	6.72359	57.8021	4.1e-05	0.00122095
64131	ENSG00000103489	XYLT1	xylosyltransferase 1	0.948453	3.70126	57.8138	4.1e-05	0.00122095
64131	ENSG00000285395	XYLT1	xylosyltransferase 1	0.948453	3.70126	57.8138	4.1e-05	0.00122095
9355	ENSG00000106689	LHX2	LIM homeobox 2	-1.33251	2.27707	57.7101	4.13e-05	0.00122631
105371409	NA	LOC105371409	cadmium/zinc-transporting ATPase HMA2	1.3944	3.29222	57.6546	4.14e-05	0.00122668
27297	ENSG00000241258	CRCP	CGRP receptor component	0.641236	6.31241	57.6667	4.14e-05	0.00122668
26156	ENSG00000171490	RSL1D1	ribosomal L1 domain containing 1	0.694286	7.90508	57.568	4.16e-05	0.00123166
8626	ENSG00000073282	TP63	tumor protein p63	1.64479	1.09263	57.5394	4.17e-05	0.00123192
10486	ENSG00000112186	CAP2	cyclase associated actin cytoskeleton regulatory protein 2	0.89421	5.91039	57.4891	4.19e-05	0.00123396
202	ENSG00000112297	CRYBG1	crystallin beta-gamma domain containing 1	-0.803482	6.58479	57.3455	4.23e-05	0.00124276
55703	ENSG00000013503	POLR3B	RNA polymerase III subunit B	0.958981	4.05679	57.3318	4.23e-05	0.00124276
23590	ENSG00000148459	PDSS1	decaprenyl diphosphate synthase subunit 1	0.724611	4.54856	57.1363	4.29e-05	0.00125695
285489	ENSG00000175920	DOK7	docking protein 7	0.816292	4.63322	57.0274	4.32e-05	0.00126401
64216	ENSG00000162851	TFB2M	transcription factor B2, mitochondrial	0.852256	4.85079	56.9821	4.33e-05	0.00126413
9480	ENSG00000119547	ONECUT2	one cut homeobox 2	1.10118	4.89667	56.9762	4.33e-05	0.00126413
23705	ENSG00000182985	CADM1	cell adhesion molecule 1	0.818803	5.50826	56.8576	4.37e-05	0.00126651
55319	ENSG00000198498	TMA16	translation machinery associated 16 homolog	0.871843	5.71016	56.8885	4.36e-05	0.00126651
5795	ENSG00000149177	PTPRJ	protein tyrosine phosphatase receptor type J	-0.714886	5.88287	56.8667	4.36e-05	0.00126651
84708	ENSG00000072201	LNX1	ligand of numb-protein X 1	-0.98486	3.1512	56.8492	4.37e-05	0.00126651
9730	ENSG00000145041	DCAF1	DDB1 and CUL4 associated factor 1	0.547062	5.88776	56.7857	4.39e-05	0.00126982
83667	ENSG00000130766	SESN2	sestrin 2	-0.653676	5.1097	56.7351	4.4e-05	0.00127204
83667	ENSG00000285069	SESN2	sestrin 2	-0.653676	5.1097	56.7351	4.4e-05	0.00127204
57492	ENSG00000049618	ARID1B	AT-rich interaction domain 1B	0.728301	6.38206	56.7051	4.41e-05	0.00127252
10957	ENSG00000146278	PNRC1	proline rich nuclear receptor coactivator 1	-0.74758	6.0292	56.5466	4.46e-05	0.00127281
22984	ENSG00000148843	PDCD11	programmed cell death 11	0.750148	6.71692	56.5937	4.44e-05	0.00127281
27333	ENSG00000173905	GOLIM4	golgi integral membrane protein 4	1.08899	4.87732	56.5619	4.45e-05	0.00127281
284352	ENSG00000104866	PPP1R37	protein phosphatase 1 regulatory subunit 37	-0.552788	6.26315	56.4837	4.48e-05	0.00127281
51651	ENSG00000141378	PTRH2	peptidyl-tRNA hydrolase 2	0.634724	6.28013	56.6093	4.44e-05	0.00127281
5493	ENSG00000118898	PPL	periplakin	-0.612495	6.91033	56.619	4.44e-05	0.00127281
6920	ENSG00000204219	TCEA3	transcription elongation factor A3	-0.71922	4.67838	56.5367	4.46e-05	0.00127281
6920	ENSG00000282941	TCEA3	transcription elongation factor A3	-0.71922	4.67838	56.5367	4.46e-05	0.00127281
79575	ENSG00000127220	ABHD8	abhydrolase domain containing 8	-1.04287	2.73157	56.4847	4.48e-05	0.00127281
80067	ENSG00000115827	DCAF17	DDB1 and CUL4 associated factor 17	0.674621	5.01753	56.5301	4.46e-05	0.00127281
22893	ENSG00000140320	BAHD1	bromo adjacent homology domain containing 1	-0.523311	6.39589	56.4114	4.5e-05	0.00127696
79693	ENSG00000196449	YRDC	yrdC N6-threonylcarbamoyltransferase domain containing	0.79511	4.63812	56.3738	4.51e-05	0.00127814
10105	ENSG00000108179	PPIF	peptidylprolyl isomerase F	0.695373	6.21976	56.1936	4.57e-05	0.00129173
56944	ENSG00000116774	OLFML3	olfactomedin like 3	1.39211	4.66591	59.5364	4.65e-05	0.00131304
11099	ENSG00000070778	PTPN21	protein tyrosine phosphatase non-receptor type 21	0.839806	5.64819	55.8986	4.66e-05	0.00131362
158135	ENSG00000175764	TTLL11	tubulin tyrosine ligase like 11	0.922828	2.84214	55.8741	4.67e-05	0.0013137
201931	ENSG00000170088	TMEM192	transmembrane protein 192	0.532542	5.83724	55.7209	4.72e-05	0.00132324
210	ENSG00000148218	ALAD	aminolevulinate dehydratase	-0.590901	6.05298	55.7415	4.71e-05	0.00132324
23389	ENSG00000123066	MED13L	mediator complex subunit 13L	0.687434	8.52731	55.582	4.76e-05	0.00133145
2744	ENSG00000115419	GLS	glutaminase	0.728588	6.7231	55.5944	4.76e-05	0.00133145
83888	ENSG00000137441	FGFBP2	fibroblast growth factor binding protein 2	4.61357	-1.20785	55.5603	4.77e-05	0.00133145
11218	ENSG00000064703	DDX20	DEAD-box helicase 20	0.731509	5.36754	55.446	4.8e-05	0.00133979
100129461	ENSG00000272142	LYRM4-AS1	LYRM4 antisense RNA 1	1.14715	2.05246	55.293	4.86e-05	0.00135151
151195	ENSG00000163249	CCNYL1	cyclin Y like 1	0.641009	5.0312	55.2728	4.86e-05	0.00135151
9486	ENSG00000115526	CHST10	carbohydrate sulfotransferase 10	1.07866	3.47743	55.1763	4.89e-05	0.00135622
9853	ENSG00000198853	RUSC2	RUN and SH3 domain containing 2	0.790851	4.0024	55.1977	4.89e-05	0.00135622
10244	ENSG00000136933	RABEPK	Rab9 effector protein with kelch motifs	0.861865	4.07656	54.9645	4.97e-05	0.00137399
23548	ENSG00000113638	TTC33	tetratricopeptide repeat domain 33	-1.09878	3.6497	54.8118	5.02e-05	0.00138638
196993	ENSG00000225362	CT62	cancer/testis associated 62	1.25447	1.71771	54.6776	5.07e-05	0.00139464
23433	ENSG00000119729	RHOQ	ras homolog family member Q	-0.574057	6.6031	54.6582	5.07e-05	0.00139464
57169	ENSG00000124201	ZNFX1	zinc finger NFX1-type containing 1	-0.543331	8.10217	54.6672	5.07e-05	0.00139464
83999	ENSG00000183762	KREMEN1	kringle containing transmembrane protein 1	-1.01268	4.29919	54.4303	5.15e-05	0.0014147
2899	ENSG00000163873	GRIK3	glutamate ionotropic receptor kainate type subunit 3	1.43277	1.3516	54.3747	5.17e-05	0.00141576
8871	ENSG00000078269	SYNJ2	synaptojanin 2	0.543345	5.98566	54.3952	5.17e-05	0.00141576
100499467	ENSG00000227036	LINC00673	long intergenic non-protein coding RNA 673	2.64112	-0.187745	54.2859	5.21e-05	0.00142014
10514	ENSG00000132382	MYBBP1A	MYB binding protein 1a	0.747437	6.37073	54.2971	5.2e-05	0.00142014
55603	ENSG00000112773	TENT5A	terminal nucleotidyltransferase 5A	0.863118	7.6754	54.2609	5.21e-05	0.0014204
6340	ENSG00000166828	SCNN1G	sodium channel epithelial 1 subunit gamma	1.99004	1.88166	54.1207	5.27e-05	0.00143008
85456	ENSG00000149115	TNKS1BP1	tankyrase 1 binding protein 1	-0.580099	6.9813	54.1195	5.27e-05	0.00143008
58477	ENSG00000144867	SRPRB	SRP receptor subunit beta	0.641492	6.46037	54.0703	5.28e-05	0.0014328
2064	ENSG00000141736	ERBB2	erb-b2 receptor tyrosine kinase 2	-0.60736	7.36739	54.0444	5.29e-05	0.00143319
85004	ENSG00000134533	RERG	RAS like estrogen regulated growth inhibitor	1.46682	3.72682	55.4158	5.33e-05	0.00144087
91801	ENSG00000137760	ALKBH8	alkB homolog 8, tRNA methyltransferase	0.889226	3.1748	53.9001	5.35e-05	0.00144332
200316	ENSG00000128394	APOBEC3F	apolipoprotein B mRNA editing enzyme catalytic subunit 3F	-1.30715	1.48337	53.6668	5.44e-05	0.00146497
55326	ENSG00000155189	AGPAT5	1-acylglycerol-3-phosphate O-acyltransferase 5	0.526382	5.62391	53.6068	5.46e-05	0.00146893
55326	ENSG00000284980	AGPAT5	1-acylglycerol-3-phosphate O-acyltransferase 5	0.526382	5.62391	53.6068	5.46e-05	0.00146893
8997	ENSG00000160145	KALRN	kalirin RhoGEF kinase	-0.772518	4.3302	53.5688	5.47e-05	0.00147061
84541	ENSG00000163376	KBTBD8	kelch repeat and BTB domain containing 8	1.41925	2.77013	53.5372	5.49e-05	0.00147166
10717	ENSG00000134262	AP4B1	adaptor related protein complex 4 subunit beta 1	0.564608	5.78381	53.4752	5.51e-05	0.00147586
3221	ENSG00000198353	HOXC4	homeobox C4	-1.53635	1.03069	53.3905	5.54e-05	0.00148133
54475	ENSG00000073536	NLE1	notchless homolog 1	0.704964	4.28769	53.3799	5.55e-05	0.00148133
5331	ENSG00000149782	PLCB3	phospholipase C beta 3	-0.751445	6.17528	53.1842	5.63e-05	0.00149976
10420	ENSG00000070759	TESK2	testis associated actin remodelling kinase 2	-1.10562	2.91028	53.1371	5.64e-05	0.00150252
6432	ENSG00000115875	SRSF7	serine and arginine rich splicing factor 7	0.696582	7.87666	53.0977	5.66e-05	0.00150446
4149	ENSG00000125952	MAX	MYC associated factor X	0.568631	6.15072	53.0627	5.67e-05	0.00150593
5168	ENSG00000136960	ENPP2	ectonucleotide pyrophosphatase/phosphodiesterase 2	3.97772	-1.09877	52.9209	5.73e-05	0.00151665
56997	ENSG00000163050	COQ8A	coenzyme Q8A	0.5627	5.63553	52.9363	5.73e-05	0.00151665
84306	ENSG00000126249	PDCD2L	programmed cell death 2 like	0.752383	4.06065	52.8866	5.75e-05	0.00151808
9076	ENSG00000163347	CLDN1	claudin 1	1.32616	3.24946	52.8517	5.76e-05	0.00151958
9923	ENSG00000184677	ZBTB40	zinc finger and BTB domain containing 40	0.688761	5.74838	52.7491	5.8e-05	0.00152848
6431	ENSG00000124193	SRSF6	serine and arginine rich splicing factor 6	0.58759	8.01409	52.6891	5.83e-05	0.00153276
286336	ENSG00000126882	FAM78A	family with sequence similarity 78 member A	-1.23912	2.13763	52.6582	5.84e-05	0.00153286
6725	ENSG00000125508	SRMS	src-related kinase lacking C-terminal regulatory tyrosine and N-terminal myristylation sites	-1.17965	2.28535	52.6465	5.85e-05	0.00153286
100134229	ENSG00000260231	KDM7A-DT	KDM7A divergent transcript	0.973747	2.94322	52.3148	5.99e-05	0.00154571
1741	ENSG00000082458	DLG3	discs large MAGUK scaffold protein 3	-0.641771	5.34182	52.3468	5.97e-05	0.00154571
19	ENSG00000165029	ABCA1	ATP binding cassette subfamily A member 1	-1.52342	3.17467	52.5396	5.93e-05	0.00154571
27292	ENSG00000086189	DIMT1	DIM1 rRNA methyltransferase and ribosome maturation factor	1.0139	4.8399	52.3563	5.97e-05	0.00154571
55140	ENSG00000134014	ELP3	elongator acetyltransferase complex subunit 3	0.642938	5.01755	52.3038	5.99e-05	0.00154571
55638	ENSG00000147642	SYBU	syntabulin	1.94285	2.0493	52.3082	5.99e-05	0.00154571
7162	ENSG00000146242	TPBG	trophoblast glycoprotein	0.659693	7.50785	52.4537	5.93e-05	0.00154571
7162	ENSG00000283085	TPBG	trophoblast glycoprotein	0.659693	7.50785	52.4537	5.93e-05	0.00154571
84247	ENSG00000188636	RTL6	retrotransposon Gag like 6	0.586094	6.29205	52.3132	5.99e-05	0.00154571
867	ENSG00000110395	CBL	Cbl proto-oncogene	-0.650579	5.98174	52.4795	5.92e-05	0.00154571
93589	ENSG00000151062	CACNA2D4	calcium voltage-gated channel auxiliary subunit alpha2delta 4	1.42744	1.36135	52.3119	5.99e-05	0.00154571
93589	ENSG00000284953	CACNA2D4	calcium voltage-gated channel auxiliary subunit alpha2delta 4	1.42744	1.36135	52.3119	5.99e-05	0.00154571
9467	ENSG00000131370	SH3BP5	SH3 domain binding protein 5	0.927525	6.58413	52.4309	5.94e-05	0.00154571
341640	ENSG00000150893	FREM2	FRAS1 related extracellular matrix 2	1.21177	8.1798	55.5596	6e-05	0.00154651
79697	ENSG00000170468	RIOX1	ribosomal oxygenase 1	0.644943	5.48424	52.1955	6.04e-05	0.00155329
9841	ENSG00000112365	ZBTB24	zinc finger and BTB domain containing 24	0.706319	4.82106	52.1694	6.05e-05	0.00155394
7067	ENSG00000126351	THRA	thyroid hormone receptor alpha	-1.0083	3.7424	52.018	6.12e-05	0.00156877
64174	ENSG00000167261	DPEP2	dipeptidase 2	4.02692	-0.706263	51.9402	6.15e-05	0.00157534
101928841	NA	NA	NA	2.55511	0.501886	51.7058	6.26e-05	0.00160007
8462	ENSG00000172059	KLF11	KLF transcription factor 11	0.554658	5.10778	51.6688	6.27e-05	0.00160206
51605	ENSG00000089195	TRMT6	tRNA methyltransferase 6 non-catalytic subunit	0.671692	4.83004	51.5495	6.33e-05	0.00161138
54868	ENSG00000109066	TMEM104	transmembrane protein 104	0.704355	4.8561	51.5553	6.33e-05	0.00161138
10444	ENSG00000160445	ZER1	zyg-11 related cell cycle regulator	-0.526847	6.65231	51.4827	6.36e-05	0.00161692
133522	ENSG00000155846	PPARGC1B	PPARG coactivator 1 beta	0.862603	3.99168	51.4409	6.38e-05	0.00161952
10761	ENSG00000170965	PLAC1	placenta enriched 1	2.14711	0.413181	51.4169	6.39e-05	0.00162002
11189	ENSG00000159409	CELF3	CUGBP Elav-like family member 3	-1.2546	1.75824	51.1667	6.51e-05	0.00164633
51230	ENSG00000025293	PHF20	PHD finger protein 20	-0.502372	6.06361	51.15	6.52e-05	0.00164633
6838	ENSG00000148296	SURF6	surfeit 6	0.532736	6.13197	51.1385	6.52e-05	0.00164633
6838	ENSG00000281309	SURF6	surfeit 6	0.532736	6.13197	51.1385	6.52e-05	0.00164633
6387	ENSG00000107562	CXCL12	C-X-C motif chemokine ligand 12	2.5635	5.97629	77.9072	6.54e-05	0.00164822
2263	ENSG00000066468	FGFR2	fibroblast growth factor receptor 2	0.815491	5.27091	51.0796	6.55e-05	0.00164874
100128881	ENSG00000261373	VPS9D1-AS1	VPS9D1 antisense RNA 1	0.725819	4.34382	51.051	6.56e-05	0.00164985
23246	ENSG00000261236	BOP1	BOP1 ribosomal biogenesis factor	0.611281	6.42999	51.0032	6.59e-05	0.00165331
10765	ENSG00000117139	KDM5B	lysine demethylase 5B	-0.563654	8.40041	50.8678	6.65e-05	0.00165807
55131	ENSG00000106344	RBM28	RNA binding motif protein 28	0.595994	5.93894	50.8753	6.65e-05	0.00165807
6549	ENSG00000115616	SLC9A2	solute carrier family 9 member A2	0.560833	5.56343	50.8716	6.65e-05	0.00165807
8882	ENSG00000109917	ZPR1	ZPR1 zinc finger	0.69348	5.21696	50.9007	6.64e-05	0.00165807
9848	ENSG00000198948	MFAP3L	microfibril associated protein 3 like	-0.720521	5.81265	50.9092	6.63e-05	0.00165807
92312	ENSG00000254726	MEX3A	mex-3 RNA binding family member A	-0.853585	5.64547	50.7753	6.7e-05	0.00166652
9381	ENSG00000115155	OTOF	otoferlin	5.53155	-0.741571	50.7607	6.71e-05	0.00166652
6195	ENSG00000117676	RPS6KA1	ribosomal protein S6 kinase A1	-0.891472	4.5476	50.6825	6.75e-05	0.00167383
6195	ENSG00000281877	RPS6KA1	ribosomal protein S6 kinase A1	-0.891472	4.5476	50.6825	6.75e-05	0.00167383
752	ENSG00000184922	FMNL1	formin like 1	-0.820606	3.55831	50.6208	6.78e-05	0.00167913
405	ENSG00000143437	ARNT	aryl hydrocarbon receptor nuclear translocator	-0.56735	6.45201	50.45	6.86e-05	0.00169819
994	ENSG00000101224	CDC25B	cell division cycle 25B	-0.551088	7.69258	50.4177	6.88e-05	0.00169988
58499	ENSG00000148143	ZNF462	zinc finger protein 462	0.92894	3.57336	50.3636	6.91e-05	0.00170434
114770	ENSG00000161031	PGLYRP2	peptidoglycan recognition protein 2	2.9275	-0.773756	50.1386	7.02e-05	0.00172836
126433	ENSG00000161243	FBXO27	F-box protein 27	-0.744616	5.33102	50.1436	7.02e-05	0.00172836
9700	ENSG00000135476	ESPL1	extra spindle pole bodies like 1, separase	-0.607398	5.77903	50.0024	7.1e-05	0.00174364
4889	ENSG00000164129	NPY5R	neuropeptide Y receptor Y5	1.37294	2.64292	49.8618	7.17e-05	0.00175968
80304	ENSG00000163026	WDCP	WD repeat and coiled coil containing	0.837432	3.53579	49.8142	7.2e-05	0.00176353
60386	ENSG00000125454	SLC25A19	solute carrier family 25 member 19	0.874093	3.76721	49.7733	7.22e-05	0.00176649
5570	ENSG00000135549	PKIB	cAMP-dependent protein kinase inhibitor beta	1.17457	6.27652	53.1124	7.36e-05	0.00179866
51804	ENSG00000100625	SIX4	SIX homeobox 4	-0.590807	6.10048	49.3829	7.44e-05	0.00181431
5205	ENSG00000081923	ATP8B1	ATPase phospholipid transporting 8B1	0.604416	5.39499	49.3285	7.47e-05	0.00181676
89890	ENSG00000165572	KBTBD6	kelch repeat and BTB domain containing 6	0.784654	5.49426	49.3434	7.46e-05	0.00181676
636	ENSG00000151746	BICD1	BICD cargo adaptor 1	0.648467	4.52857	49.2985	7.48e-05	0.00181839
54621	ENSG00000176834	VSIG10	V-set and immunoglobulin domain containing 10	-0.537075	5.67375	49.2333	7.52e-05	0.00182489
91893	ENSG00000255561	FDXACB1	ferredoxin-fold anticodon binding domain containing 1	1.06064	2.30081	49.0896	7.6e-05	0.00184241
51228	ENSG00000139433	GLTP	glycolipid transfer protein	-0.605414	5.41138	49.0315	7.64e-05	0.00184803
7343	ENSG00000108312	UBTF	upstream binding transcription factor	0.483946	7.34966	48.8947	7.72e-05	0.00186488
55286	ENSG00000154274	C4orf19	chromosome 4 open reading frame 19	0.924734	5.48466	48.8395	7.75e-05	0.0018702
10626	ENSG00000221926	TRIM16	tripartite motif containing 16	0.928536	6.87951	48.8917	7.77e-05	0.00187088
126567	ENSG00000183186	C2CD4C	C2 calcium dependent domain containing 4C	-1.3354	2.32297	48.8054	7.77e-05	0.00187088
10174	ENSG00000120896	SORBS3	sorbin and SH3 domain containing 3	-0.704642	5.27616	48.674	7.85e-05	0.00188202
7301	ENSG00000092445	TYRO3	TYRO3 protein tyrosine kinase	-0.674953	3.92206	48.6679	7.85e-05	0.00188202
81031	ENSG00000197496	SLC2A10	solute carrier family 2 member 10	-1.11618	5.90772	51.3753	7.84e-05	0.00188202
768211	ENSG00000181826	RELL1	RELT like 1	-0.756085	4.17712	48.6265	7.88e-05	0.00188545
285958	ENSG00000232956	SNHG15	small nucleolar RNA host gene 15	0.889536	3.77317	48.5895	7.9e-05	0.00188824
10276	ENSG00000173848	NET1	neuroepithelial cell transforming 1	-0.505513	7.27512	48.5502	7.92e-05	0.00188882
64785	ENSG00000181938	GINS3	GINS complex subunit 3	0.892977	4.15141	48.5548	7.92e-05	0.00188882
23220	ENSG00000110042	DTX4	deltex E3 ubiquitin ligase 4	-1.46162	3.13485	48.6105	7.94e-05	0.00189088
55806	ENSG00000168453	HR	HR lysine demethylase and nuclear receptor corepressor	0.605215	4.73442	48.4758	7.97e-05	0.00189452
91523	ENSG00000179715	PCED1B	PC-esterase domain containing 1B	-0.971897	3.33937	48.3916	8.02e-05	0.00190428
7372	ENSG00000114491	UMPS	uridine monophosphate synthetase	0.718731	6.2818	48.3198	8.07e-05	0.00191228
50604	ENSG00000162891	IL20	interleukin 20	3.01022	-1.22898	48.2634	8.1e-05	0.00191805
60436	ENSG00000118707	TGIF2	TGFB induced factor homeobox 2	0.500456	6.47475	48.218	8.13e-05	0.0019222
55226	ENSG00000135372	NAT10	N-acetyltransferase 10	0.510786	6.75185	48.1374	8.18e-05	0.00193164
440461	NA	ARHGAP27P2	Rho GTPase activating protein 27 pseudogene 2	-2.2322	1.04125	48.0835	8.21e-05	0.00193712
55759	ENSG00000138442	WDR12	WD repeat domain 12	0.525178	5.61266	47.9973	8.27e-05	0.00194751
284161	ENSG00000153982	GDPD1	glycerophosphodiester phosphodiesterase domain containing 1	-1.69314	2.25594	47.851	8.36e-05	0.00196717
84798	ENSG00000167747	C19orf48P	multidrug resistance-related protein	0.59273	6.54536	47.7474	8.43e-05	0.00198047
2675	ENSG00000168546	GFRA2	GDNF family receptor alpha 2	5.46316	-1.98344	47.6961	8.47e-05	0.00198576
11037	ENSG00000243244	STON1	stonin 1	-1.89032	2.5736	48.9799	8.61e-05	0.00201507
5164	ENSG00000005882	PDK2	pyruvate dehydrogenase kinase 2	-0.607544	4.56296	47.4762	8.61e-05	0.00201507
100093631	ENSG00000233369	GTF2IP4	general transcription factor IIi pseudogene 4	-0.576479	4.94194	47.2863	8.74e-05	0.00204242
9149	ENSG00000105204	DYRK1B	dual specificity tyrosine phosphorylation regulated kinase 1B	-0.672186	5.17087	47.2654	8.76e-05	0.00204305
9149	ENSG00000281320	DYRK1B	dual specificity tyrosine phosphorylation regulated kinase 1B	-0.672186	5.17087	47.2654	8.76e-05	0.00204305
123283	ENSG00000185418	TARS3	threonyl-tRNA synthetase 3	0.724815	3.85439	47.0425	8.91e-05	0.00207538
163732	ENSG00000179862	CITED4	Cbp/p300 interacting transactivator with Glu/Asp rich carboxy-terminal domain 4	0.891197	3.0933	47.0328	8.92e-05	0.00207538
54974	ENSG00000113272	THG1L	tRNA-histidine guanylyltransferase 1 like	0.730984	3.90788	47.0058	8.94e-05	0.00207698
868	ENSG00000114423	CBLB	Cbl proto-oncogene B	-0.593453	4.63188	46.9896	8.95e-05	0.00207698
392617	ENSG00000225968	ELFN1	extracellular leucine rich repeat and fibronectin type III domain containing 1	-1.44973	2.1758	46.946	8.98e-05	0.00208141
6419	ENSG00000170364	SETMAR	SET domain and mariner transposase fusion gene	0.643571	4.3625	46.8745	9.03e-05	0.00209048
1627	ENSG00000113758	DBN1	drebrin 1	-0.515529	7.1447	46.704	9.15e-05	0.00211341
7056	ENSG00000178726	THBD	thrombomodulin	0.882034	4.39238	46.7084	9.15e-05	0.00211341
57646	ENSG00000048028	USP28	ubiquitin specific peptidase 28	-0.564831	4.62805	46.5808	9.24e-05	0.00212864
79943	ENSG00000185730	ZNF696	zinc finger protein 696	0.599237	4.44234	46.5945	9.23e-05	0.00212864
157567	ENSG00000186106	ANKRD46	ankyrin repeat domain 46	0.593145	4.63353	46.5565	9.26e-05	0.00212999
953	ENSG00000138185	ENTPD1	ectonucleoside triphosphate diphosphohydrolase 1	0.531622	5.70914	46.5099	9.3e-05	0.00213512
389524	ENSG00000174428	GTF2IRD2B	GTF2I repeat domain containing 2B	0.661656	3.92239	46.4432	9.35e-05	0.00213815
50805	ENSG00000113430	IRX4	iroquois homeobox 4	-0.595755	4.63326	46.4691	9.33e-05	0.00213815
79689	ENSG00000127954	STEAP4	STEAP4 metalloreductase	1.52638	0.547238	46.4481	9.34e-05	0.00213815
90203	ENSG00000124104	SNX21	sorting nexin family member 21	-0.664157	4.66336	46.408	9.37e-05	0.00214137
23531	ENSG00000108960	MMD	monocyte to macrophage differentiation associated	-0.831102	3.84646	46.3894	9.39e-05	0.00214177
744	ENSG00000066382	MPPED2	metallophosphoesterase domain containing 2	2.1243	1.03426	46.3699	9.4e-05	0.00214234
64778	ENSG00000075420	FNDC3B	fibronectin type III domain containing 3B	0.699426	6.00095	46.281	9.47e-05	0.00214964
83394	ENSG00000091622	PITPNM3	PITPNM family member 3	-1.37898	2.01385	46.2789	9.47e-05	0.00214964
84717	ENSG00000167674	HDGFL2	HDGF like 2	-0.58451	6.04152	46.2989	9.46e-05	0.00214964
28990	ENSG00000034533	ASTE1	asteroid homolog 1	0.655543	3.83891	46.2315	9.51e-05	0.00215505
3123	ENSG00000196126	HLA-DRB1	major histocompatibility complex, class II, DR beta 1	0.719393	5.6146	46.082	9.62e-05	0.0021699
3123	ENSG00000206240	HLA-DRB1	major histocompatibility complex, class II, DR beta 1	0.719393	5.6146	46.082	9.62e-05	0.0021699
3123	ENSG00000206306	HLA-DRB1	major histocompatibility complex, class II, DR beta 1	0.719393	5.6146	46.082	9.62e-05	0.0021699
3123	ENSG00000228080	HLA-DRB1	major histocompatibility complex, class II, DR beta 1	0.719393	5.6146	46.082	9.62e-05	0.0021699
3123	ENSG00000229074	HLA-DRB1	major histocompatibility complex, class II, DR beta 1	0.719393	5.6146	46.082	9.62e-05	0.0021699
3123	ENSG00000236884	HLA-DRB1	major histocompatibility complex, class II, DR beta 1	0.719393	5.6146	46.082	9.62e-05	0.0021699
49854	ENSG00000173276	ZBTB21	zinc finger and BTB domain containing 21	0.64154	5.50894	46.0827	9.62e-05	0.0021699
55200	ENSG00000008323	PLEKHG6	pleckstrin homology and RhoGEF domain containing G6	-0.832516	2.82098	46.0998	9.61e-05	0.0021699
5817	ENSG00000073008	PVR	PVR cell adhesion molecule	0.760631	5.78986	46.0847	9.62e-05	0.0021699
56342	ENSG00000130810	PPAN	peter pan homolog	1.05234	2.28691	46.0629	9.64e-05	0.00217045
221830	ENSG00000105849	POLR1F	RNA polymerase I subunit F	0.67285	4.69563	46.0076	9.68e-05	0.00217733
57143	ENSG00000063761	ADCK1	aarF domain containing kinase 1	0.646963	3.90109	45.9819	9.7e-05	0.00217906
23095	ENSG00000054523	KIF1B	kinesin family member 1B	-0.57648	6.36651	45.9376	9.73e-05	0.00218407
145741	ENSG00000198535	C2CD4A	C2 calcium dependent domain containing 4A	1.50584	0.955183	45.8903	9.77e-05	0.0021891
58190	ENSG00000144579	CTDSP1	CTD small phosphatase 1	-0.520676	6.87539	45.8775	9.78e-05	0.0021891
55072	ENSG00000092098	RNF31	ring finger protein 31	-0.515806	6.8063	45.8031	9.84e-05	0.00219671
55072	ENSG00000285152	RNF31	ring finger protein 31	-0.515806	6.8063	45.8031	9.84e-05	0.00219671
91056	ENSG00000254470	AP5B1	adaptor related protein complex 5 subunit beta 1	-0.718051	5.1004	45.812	9.83e-05	0.00219671
55841	ENSG00000047644	WWC3	WWC family member 3	0.528131	6.68637	45.7697	9.87e-05	0.00219986
2872	ENSG00000099875	MKNK2	MAPK interacting serine/threonine kinase 2	-0.779429	6.43818	45.7345	9.9e-05	0.00220334
114880	ENSG00000079156	OSBPL6	oxysterol binding protein like 6	-0.631918	4.10748	45.715	9.91e-05	0.00220402
5874	ENSG00000041353	RAB27B	RAB27B, member RAS oncogene family	-0.905826	5.25714	45.6986	9.92e-05	0.00220417
83743	ENSG00000105447	GRWD1	glutamate rich WD repeat containing 1	0.846254	6.2817	45.5275	0.00010063	0.00223216
153443	ENSG00000151304	SRFBP1	serum response factor binding protein 1	0.93838	4.08751	45.4372	0.000101373	0.00224579
29946	ENSG00000167565	SERTAD3	SERTA domain containing 3	-0.557246	5.47864	45.3412	0.000102169	0.00226058
29902	ENSG00000204856	FAM216A	family with sequence similarity 216 member A	0.798115	3.16787	45.2036	0.000103323	0.00228088
642273	ENSG00000184731	FAM110C	family with sequence similarity 110 member C	-0.49948	5.37167	45.201	0.000103346	0.00228088
116931	ENSG00000144893	MED12L	mediator complex subunit 12L	-0.558583	4.98445	45.1677	0.000103628	0.00228423
10220	ENSG00000135414	GDF11	growth differentiation factor 11	-0.633969	4.8917	45.128	0.000103965	0.0022888
23507	ENSG00000197147	LRRC8B	leucine rich repeat containing 8 VRAC subunit B	0.645236	5.25041	45.1079	0.000104137	0.00228971
83660	ENSG00000171914	TLN2	talin 2	0.633686	4.91316	45.0747	0.00010442	0.00229306
25963	ENSG00000103978	TMEM87A	transmembrane protein 87A	0.510176	6.38042	45.0532	0.000104605	0.00229425
1789	ENSG00000088305	DNMT3B	DNA methyltransferase 3 beta	-0.518669	5.05649	45.0199	0.00010489	0.00229479
8934	ENSG00000117280	RAB29	RAB29, member RAS oncogene family	-0.518102	5.87395	45.0216	0.000104876	0.00229479
55315	ENSG00000198246	SLC29A3	solute carrier family 29 member 3	0.640507	4.00826	44.9638	0.000105375	0.00229966
55924	ENSG00000197852	INKA2	inka box actin regulator 2	0.765217	4.25738	44.9769	0.000105261	0.00229966
23466	ENSG00000183741	CBX6	chromobox 6	-0.532672	7.38541	44.8548	0.000106324	0.0023175
120227	ENSG00000186104	CYP2R1	cytochrome P450 family 2 subfamily R member 1	0.699172	3.74969	44.7562	0.000107192	0.00232176
254428	ENSG00000133065	SLC41A1	solute carrier family 41 member 1	-0.607596	5.40789	44.7355	0.000107375	0.00232176
25849	ENSG00000169116	PARM1	prostate androgen-regulated mucin-like protein 1	1.00279	2.33235	44.7468	0.000107274	0.00232176
26056	ENSG00000135631	RAB11FIP5	RAB11 family interacting protein 5	-1.29826	2.93444	44.7884	0.000106907	0.00232176
27346	ENSG00000109084	TMEM97	transmembrane protein 97	0.5286	5.46419	44.7727	0.000107045	0.00232176
4857	ENSG00000139910	NOVA1	NOVA alternative splicing regulator 1	-1.19782	2.57531	44.7612	0.000107148	0.00232176
7571	ENSG00000167377	ZNF23	zinc finger protein 23	0.601051	4.69416	44.7276	0.000107445	0.00232176
5338	ENSG00000129219	PLD2	phospholipase D2	-0.708468	4.31294	44.6843	0.00010783	0.00232722
57486	ENSG00000123213	NLN	neurolysin	0.565065	6.0508	44.6432	0.000108196	0.00233226
79958	ENSG00000205744	DENND1C	DENN domain containing 1C	-0.69022	3.90013	44.5564	0.000108977	0.00234621
64425	ENSG00000137054	POLR1E	RNA polymerase I subunit E	0.754143	3.93627	44.4779	0.000109688	0.00235613
81928	ENSG00000149679	CABLES2	Cdk5 and Abl enzyme substrate 2	-0.910585	5.29192	44.4759	0.000109706	0.00235613
22905	ENSG00000072134	EPN2	epsin 2	-0.570869	5.39672	44.4419	0.000110016	0.00235703
26578	ENSG00000134996	OSTF1	osteoclast stimulating factor 1	0.783233	5.5953	44.451	0.000109933	0.00235703
57649	ENSG00000109118	PHF12	PHD finger protein 12	-0.546321	6.00015	44.4147	0.000110265	0.00235947
113263	ENSG00000106415	GLCCI1	glucocorticoid induced 1	0.515094	5.42624	44.3303	0.00011104	0.00237318
9836	ENSG00000168806	LCMT2	leucine carboxyl methyltransferase 2	0.706654	4.81189	44.3101	0.000111227	0.00237428
246175	ENSG00000138767	CNOT6L	CCR4-NOT transcription complex subunit 6 like	-0.612388	5.1846	44.2745	0.000111558	0.00237845
25896	ENSG00000143493	INTS7	integrator complex subunit 7	0.909731	4.89442	44.2425	0.000111855	0.00238191
1678	ENSG00000126953	TIMM8A	translocase of inner mitochondrial membrane 8A	0.670301	4.41859	44.1776	0.000112461	0.00239026
5829	ENSG00000089159	PXN	paxillin	-0.478416	7.70143	44.1714	0.00011252	0.00239026
3140	ENSG00000153029	MR1	major histocompatibility complex, class I-related	-0.544653	5.38906	44.1199	0.000113005	0.00239767
116236	ENSG00000168792	ABHD15	abhydrolase domain containing 15	-0.535948	4.66861	44.0282	0.000113874	0.00241029
22876	ENSG00000198825	INPP5F	inositol polyphosphate-5-phosphatase F	0.562056	5.0388	44.0337	0.000113822	0.00241029
7957	ENSG00000112425	EPM2A	EPM2A glucan phosphatase, laforin	0.770639	3.23115	43.8926	0.000115175	0.00243489
7546	ENSG00000043355	ZIC2	Zic family member 2	0.693099	3.61441	43.8641	0.000115451	0.00243779
1796	ENSG00000115325	DOK1	docking protein 1	0.666652	3.76785	43.8179	0.000115899	0.00244431
51684	ENSG00000107882	SUFU	SUFU negative regulator of hedgehog signaling	-0.670512	4.31558	43.7988	0.000116085	0.00244531
3636	ENSG00000165458	INPPL1	inositol polyphosphate phosphatase like 1	-0.485262	7.83192	43.7107	0.000116949	0.00246056
55153	ENSG00000198301	SDAD1	SDA1 domain containing 1	0.721534	5.94743	43.644	0.000117607	0.00247144
29957	ENSG00000085491	SLC25A24	solute carrier family 25 member 24	0.565524	8.75823	43.629	0.000117756	0.00247161
29957	ENSG00000284468	SLC25A24	solute carrier family 25 member 24	0.565524	8.75823	43.629	0.000117756	0.00247161
57597	ENSG00000266074	BAHCC1	BAH domain and coiled-coil containing 1	-0.780219	4.9406	43.5494	0.000118549	0.0024853
57597	ENSG00000291421	BAHCC1	BAH domain and coiled-coil containing 1	-0.780219	4.9406	43.5494	0.000118549	0.0024853
84924	ENSG00000186017	ZNF566	zinc finger protein 566	0.675476	3.74719	43.3659	0.000120404	0.00252117
9903	ENSG00000162413	KLHL21	kelch like family member 21	0.63462	5.02867	43.3511	0.000120556	0.00252134
153769	ENSG00000156463	SH3RF2	SH3 domain containing ring finger 2	1.64167	1.01763	43.3294	0.000120778	0.00252298
252969	ENSG00000154328	NEIL2	nei like DNA glycosylase 2	0.886348	4.11802	43.2899	0.000121183	0.00252843
252969	ENSG00000292286	NEIL2	nei like DNA glycosylase 2	0.886348	4.11802	43.2899	0.000121183	0.00252843
3268	ENSG00000106351	AGFG2	ArfGAP with FG repeats 2	-0.664365	4.00259	43.2383	0.000121715	0.00253346
4355	ENSG00000108852	MPP2	MAGUK p55 scaffold protein 2	-1.03553	3.09267	43.2421	0.000121675	0.00253346
84985	ENSG00000147689	FAM83A	family with sequence similarity 83 member A	-0.677156	5.12903	43.2246	0.000121857	0.00253346
81621	ENSG00000107821	KAZALD1	Kazal type serine peptidase inhibitor domain 1	-0.50321	5.22101	43.1794	0.000122326	0.00254021
114789	ENSG00000148339	SLC25A25	solute carrier family 25 member 25	0.480193	5.65657	43.1374	0.000122764	0.00254558
9922	ENSG00000144711	IQSEC1	IQ motif and Sec7 domain ArfGEF 1	-0.656214	7.05706	43.1269	0.000122874	0.00254558
126382	ENSG00000184162	NR2C2AP	nuclear receptor 2C2 associated protein	0.700436	4.97858	43.0741	0.000123428	0.00255404
1592	ENSG00000095596	CYP26A1	cytochrome P450 family 26 subfamily A member 1	1.87029	-0.0781962	42.9877	0.000124341	0.00256566
3157	ENSG00000112972	HMGCS1	3-hydroxy-3-methylglutaryl-CoA synthase 1	0.651907	8.44629	42.9795	0.000124428	0.00256566
401265	ENSG00000124743	KLHL31	kelch like family member 31	1.63886	1.26928	42.9838	0.000124382	0.00256566
54931	ENSG00000174173	TRMT10C	tRNA methyltransferase 10C, mitochondrial RNase P subunit	0.628922	6.00113	42.9514	0.000124727	0.00256881
22821	ENSG00000185989	RASA3	RAS p21 protein activator 3	0.502897	5.75316	42.7357	0.000127051	0.00261363
22821	ENSG00000280477	RASA3	RAS p21 protein activator 3	0.502897	5.75316	42.7357	0.000127051	0.00261363
51633	ENSG00000155100	OTUD6B	OTU deubiquitinase 6B	0.755775	5.63465	42.7067	0.000127369	0.0026151
84056	ENSG00000102781	KATNAL1	katanin catalytic subunit A1 like 1	-0.76941	3.82803	42.7019	0.00012742	0.0026151
115557	ENSG00000240771	ARHGEF25	Rho guanine nucleotide exchange factor 25	-0.771487	4.09507	42.6627	0.000127851	0.00262087
638	ENSG00000100290	BIK	BCL2 interacting killer	-1.1586	3.3283	42.646	0.000128034	0.00262156
9764	ENSG00000135709	KIAA0513	KIAA0513	-0.799452	6.62626	42.611	0.000128421	0.00262642
55332	ENSG00000136048	DRAM1	DNA damage regulated autophagy modulator 1	-0.681898	6.56262	42.5941	0.000128607	0.00262717
162073	ENSG00000205730	ITPRIPL2	ITPRIP like 2	-0.612464	5.07939	42.3659	0.000131163	0.00267627
144110	ENSG00000151117	TMEM86A	transmembrane protein 86A	-0.776692	2.86999	42.2311	0.000132703	0.00269842
2020	ENSG00000164778	EN2	engrailed homeobox 2	1.13405	2.07284	42.2305	0.000132709	0.00269842
7107	ENSG00000077585	GPR137B	G protein-coupled receptor 137B	-0.606196	5.23323	42.2415	0.000132583	0.00269842
55776	ENSG00000112167	SAYSD1	SAYSVFN motif domain containing 1	0.723636	5.31159	42.1513	0.000133625	0.00271244
9429	ENSG00000118777	ABCG2	ATP binding cassette subfamily G member 2 (Junior blood group)	0.873773	6.11027	42.2184	0.000133708	0.00271244
101669762	ENSG00000281406	BLACAT1	BLACAT1 overlapping LEMD1 locus	-2.20016	0.122569	42.0815	0.000134437	0.0027131
10432	ENSG00000239306	RBM14	RNA binding motif protein 14	0.488067	6.4052	42.1005	0.000134215	0.0027131
105374156	NA	NA	NA	2.61303	-0.589924	42.0874	0.000134368	0.0027131
1108	ENSG00000111642	CHD4	chromodomain helicase DNA binding protein 4	-0.50116	8.62488	42.0627	0.000134657	0.0027131
5971	ENSG00000104856	RELB	RELB proto-oncogene, NF-kB subunit	0.738052	4.48948	42.0618	0.000134667	0.0027131
9120	ENSG00000108932	SLC16A6	solute carrier family 16 member 6	0.615253	6.54062	42.0847	0.000134399	0.0027131
84858	ENSG00000165655	ZNF503	zinc finger protein 503	-0.630462	3.65701	42.0455	0.000134858	0.00271385
255324	ENSG00000182585	EPGN	epithelial mitogen	3.02721	-1.29362	42.0063	0.000135319	0.00272
4926	ENSG00000137497	NUMA1	nuclear mitotic apparatus protein 1	-0.483172	8.30308	41.9927	0.00013548	0.00272013
7091	ENSG00000106829	TLE4	TLE family member 4, transcriptional corepressor	1.86693	0.264787	41.9779	0.000135655	0.00272052
8019	ENSG00000169925	BRD3	bromodomain containing 3	-0.455991	6.72103	41.9579	0.000135891	0.00272216
116447	ENSG00000184428	TOP1MT	DNA topoisomerase I mitochondrial	0.550669	4.87513	41.8903	0.000136695	0.00273515
8693	ENSG00000257594	GALNT4	polypeptide N-acetylgalactosaminyltransferase 4	1.5664	1.05317	41.8719	0.000136914	0.00273641
6196	ENSG00000071242	RPS6KA2	ribosomal protein S6 kinase A2	0.677991	4.51776	41.8344	0.000137363	0.00273916
64782	ENSG00000181026	AEN	apoptosis enhancing nuclease	0.557704	6.74846	41.8349	0.000137357	0.00273916
11176	ENSG00000076108	BAZ2A	bromodomain adjacent to zinc finger domain 2A	-0.582965	7.81995	41.8062	0.000137702	0.0027397
171568	ENSG00000100413	POLR3H	RNA polymerase III subunit H	0.551021	5.42759	41.81	0.000137657	0.0027397
283932	ENSG00000260852	FBXL19-AS1	FBXL19 antisense RNA 1	0.521486	4.97603	41.7657	0.000138191	0.00274067
284129	ENSG00000181045	SLC26A11	solute carrier family 26 member 11	-0.811313	4.43616	41.777	0.000138054	0.00274067
28966	ENSG00000064652	SNX24	sorting nexin 24	0.810127	5.04353	41.7634	0.000138219	0.00274067
131474	ENSG00000163528	CHCHD4	coiled-coil-helix-coiled-coil-helix domain containing 4	0.659991	5.37726	41.6604	0.000139471	0.00276237
114034	ENSG00000132773	TOE1	target of EGR1, exonuclease	0.796873	3.37084	41.5745	0.000140526	0.0027739
402778	ENSG00000244242	IFITM10	interferon induced transmembrane protein 10	0.805473	2.94945	41.5935	0.000140293	0.0027739
402778	ENSG00000281618	IFITM10	interferon induced transmembrane protein 10	0.805473	2.94945	41.5935	0.000140293	0.0027739
84283	ENSG00000163472	TMEM79	transmembrane protein 79	-0.706315	4.49734	41.5787	0.000140475	0.0027739
55164	ENSG00000144736	SHQ1	SHQ1, H/ACA ribonucleoprotein assembly factor	0.558815	4.93345	41.5283	0.000141099	0.00278207
1824	ENSG00000134755	DSC2	desmocollin 2	-0.585707	5.2852	41.5082	0.000141348	0.00278387
146198	ENSG00000184939	ZFP90	ZFP90 zinc finger protein	-0.501028	6.08297	41.4192	0.000142459	0.00280261
57795	ENSG00000198797	BRINP2	BMP/retinoic acid inducible neural specific 2	1.85953	2.73523	44.0049	0.000142648	0.00280319
162989	ENSG00000160570	DEDD2	death effector domain containing 2	-0.613214	3.99525	41.3463	0.000143379	0.00281439
85027	ENSG00000256235	SMIM3	small integral membrane protein 3	-1.31554	1.94989	41.2806	0.000144213	0.0028276
24145	ENSG00000110218	PANX1	pannexin 1	0.527587	5.13209	41.2622	0.000144447	0.00282903
5165	ENSG00000067992	PDK3	pyruvate dehydrogenase kinase 3	-0.551027	4.90922	41.239	0.000144744	0.00283169
440	ENSG00000070669	ASNS	asparagine synthetase (glutamine-hydrolyzing)	0.742651	6.28964	41.2051	0.000145178	0.00283703
51157	ENSG00000213015	ZNF580	zinc finger protein 580	-0.594648	4.21817	41.1582	0.000145783	0.00284569
10938	ENSG00000110047	EHD1	EH domain containing 1	0.579382	6.32596	41.1258	0.000146202	0.0028507
129401	ENSG00000163002	NUP35	nucleoporin 35	0.933699	4.92313	41.0737	0.000146878	0.00285943
23175	ENSG00000134324	LPIN1	lipin 1	0.585981	5.63378	41.0663	0.000146975	0.00285943
65057	ENSG00000102977	ACD	ACD shelterin complex subunit and telomerase recruitment factor	-0.539774	4.43453	41.0496	0.000147194	0.00286051
256309	ENSG00000168491	CCDC110	coiled-coil domain containing 110	1.86531	0.736637	40.9765	0.000148152	0.00287596
65243	ENSG00000187801	ZFP69B	ZFP69 zinc finger protein B	0.994738	1.94629	40.9595	0.000148376	0.00287712
23038	ENSG00000142784	WDTC1	WD and tetratricopeptide repeats 1	-0.498014	5.6221	40.8299	0.000150099	0.00290731
23378	ENSG00000132275	RRP8	ribosomal RNA processing 8	0.657208	3.80499	40.7345	0.000151383	0.00292825
51001	ENSG00000156469	MTERF3	mitochondrial transcription termination factor 3	0.623256	4.77003	40.7249	0.000151513	0.00292825
23026	ENSG00000041515	MYO16	myosin XVI	1.45436	1.65038	40.648	0.000152558	0.00294521
199953	ENSG00000188807	TMEM201	transmembrane protein 201	0.662968	4.28092	40.5935	0.000153306	0.0029539
90353	ENSG00000142544	CTU1	cytosolic thiouridylase subunit 1	0.896354	3.63935	40.5906	0.000153344	0.0029539
6671	ENSG00000105866	SP4	Sp4 transcription factor	0.774157	3.58658	40.5707	0.000153619	0.00295594
54566	ENSG00000095203	EPB41L4B	erythrocyte membrane protein band 4.1 like 4B	-0.526726	5.41882	40.4924	0.000154701	0.00297352
26097	ENSG00000160679	CHTOP	chromatin target of PRMT1	0.45074	7.02597	40.3944	0.000156072	0.00299576
401236	ENSG00000230873	STMND1	stathmin domain containing 1	3.47816	-1.67927	40.3817	0.00015625	0.00299576
8140	ENSG00000103257	SLC7A5	solute carrier family 7 member 5	1.07179	10.4333	40.4427	0.00015637	0.00299576
6330	ENSG00000177098	SCN4B	sodium voltage-gated channel beta subunit 4	2.44115	-1.29932	40.3284	0.000157002	0.00300209
760	ENSG00000104267	CA2	carbonic anhydrase 2	0.873988	4.20834	40.3255	0.000157042	0.00300209
8458	ENSG00000116830	TTF2	transcription termination factor 2	0.44379	7.07387	40.2317	0.000158378	0.00302432
85463	ENSG00000149289	ZC3H12C	zinc finger CCCH-type containing 12C	1.23784	1.51816	40.2109	0.000158675	0.00302671
3716	ENSG00000162434	JAK1	Janus kinase 1	0.85697	8.70737	40.1856	0.000159038	0.00303034
80314	ENSG00000120616	EPC1	enhancer of polycomb homolog 1	0.771554	5.87299	40.1458	0.000159611	0.00303798
22849	ENSG00000107864	CPEB3	cytoplasmic polyadenylation element binding protein 3	-1.07677	2.44197	40.1239	0.000159927	0.0030407
30815	ENSG00000160408	ST6GALNAC6	ST6 N-acetylgalactosaminide alpha-2,6-sialyltransferase 6	-0.518853	4.99824	40.0645	0.00016079	0.00305049
84626	ENSG00000133619	KRBA1	KRAB-A domain containing 1	-1.13811	3.52137	40.0746	0.000160643	0.00305049
165140	ENSG00000162881	OXER1	oxoeicosanoid receptor 1	3.41287	-1.01322	40.0376	0.000161182	0.00305135
3720	ENSG00000008083	JARID2	jumonji and AT-rich interaction domain containing 2	0.511873	7.00599	40.0462	0.000161057	0.00305135
10743	ENSG00000108557	RAI1	retinoic acid induced 1	-0.612721	6.67853	39.9385	0.000162639	0.00307231
80139	ENSG00000183779	ZNF703	zinc finger protein 703	0.612962	7.25408	39.9474	0.000162508	0.00307231
55604	ENSG00000079691	CARMIL1	capping protein regulator and myosin 1 linker 1	-0.463468	5.88759	39.9064	0.000163114	0.00307798
51095	ENSG00000072756	TRNT1	tRNA nucleotidyl transferase 1	0.531881	6.11754	39.7141	0.000165996	0.003129
85442	ENSG00000171798	KNDC1	kinase non-catalytic C-lobe domain containing 1	-0.881457	5.19556	39.669	0.000166682	0.00313854
728975	ENSG00000254614	CAPN1-AS1	CAPN1 antisense RNA 1	-0.916701	2.10305	39.6029	0.000167692	0.00315419
1801	ENSG00000108963	DPH1	diphthamide biosynthesis 1	0.516811	4.71462	39.5741	0.000168135	0.00315914
1140	ENSG00000170175	CHRNB1	cholinergic receptor nicotinic beta 1 subunit	-0.970176	2.63891	39.4881	0.000169466	0.00317397
1140	ENSG00000283946	CHRNB1	cholinergic receptor nicotinic beta 1 subunit	-0.970176	2.63891	39.4881	0.000169466	0.00317397
22955	ENSG00000010803	SCMH1	Scm polycomb group protein homolog 1	-0.649676	3.27911	39.4914	0.000169415	0.00317397
80312	ENSG00000138336	TET1	tet methylcytosine dioxygenase 1	-0.942517	3.12089	39.4981	0.000169311	0.00317397
25841	ENSG00000166016	ABTB2	ankyrin repeat and BTB domain containing 2	0.4568	5.93579	39.4144	0.000170616	0.0031921
6510	ENSG00000105281	SLC1A5	solute carrier family 1 member 5	0.493515	8.51318	39.4017	0.000170815	0.00319242
1490	ENSG00000118523	CCN2	cellular communication network factor 2	1.32062	1.90848	39.3336	0.000171889	0.00320907
100499227	NA	USP2-AS1	USP2 antisense RNA 1	2.47708	-0.726301	39.2828	0.000172695	0.00321088
4987	ENSG00000125510	OPRL1	opioid related nociceptin receptor 1	-1.83591	-0.500102	39.2814	0.000172716	0.00321088
4987	ENSG00000277044	OPRL1	opioid related nociceptin receptor 1	-1.83591	-0.500102	39.2814	0.000172716	0.00321088
55622	ENSG00000018699	TTC27	tetratricopeptide repeat domain 27	0.554052	4.73303	39.3062	0.000172322	0.00321088
55718	ENSG00000058600	POLR3E	RNA polymerase III subunit E	0.579096	6.57715	39.3006	0.000172411	0.00321088
55718	ENSG00000284282	POLR3E	RNA polymerase III subunit E	0.579096	6.57715	39.3006	0.000172411	0.00321088
9600	ENSG00000110697	PITPNM1	phosphatidylinositol transfer protein membrane associated 1	-0.723503	4.39933	39.2184	0.000173722	0.00322617
343990	ENSG00000196872	CRACDL	CRACD like	-0.639919	4.93472	39.1548	0.000174746	0.0032395
79862	ENSG00000188295	ZNF669	zinc finger protein 669	0.610679	4.08271	39.1509	0.000174809	0.0032395
26010	ENSG00000196141	SPATS2L	spermatogenesis associated serine rich 2 like	0.749308	7.40732	39.0687	0.000176143	0.00326069
54894	ENSG00000108375	RNF43	ring finger protein 43	-0.779995	5.24323	39.0576	0.000176324	0.00326069
2299	ENSG00000168269	FOXI1	forkhead box I1	1.99914	1.91272	39.7436	0.000177427	0.00327764
201164	ENSG00000179598	PLD6	phospholipase D family member 6	0.841727	3.87197	38.9358	0.000178325	0.0032904
79731	ENSG00000137513	NARS2	asparaginyl-tRNA synthetase 2, mitochondrial	0.580379	5.19504	38.9257	0.000178492	0.0032904
1399	ENSG00000099942	CRKL	CRK like proto-oncogene, adaptor protein	0.487403	7.46359	38.9144	0.00017868	0.0032904
100507217	NA	CHASERR	CHD2 adjacent suppressive regulatory RNA	-0.490211	6.56401	38.8819	0.000179219	0.00329689
51678	ENSG00000105926	PALS2	protein associated with LIN7 2, MAGUK p55 family member	0.962041	4.21385	38.8521	0.000179717	0.00330002
654429	ENSG00000166159	LRTM2	leucine rich repeats and transmembrane domains 2	2.0624	-0.394686	38.8416	0.000179893	0.00330002
654429	ENSG00000285383	LRTM2	leucine rich repeats and transmembrane domains 2	2.0624	-0.394686	38.8416	0.000179893	0.00330002
7296	ENSG00000198431	TXNRD1	thioredoxin reductase 1	0.590737	8.00438	38.838	0.000179953	0.00330002
140460	ENSG00000183475	ASB7	ankyrin repeat and SOCS box containing 7	-0.486845	5.50347	38.8115	0.000180397	0.00330471
118460	ENSG00000223496	EXOSC6	exosome component 6	0.61453	6.20144	38.7235	0.000181883	0.00332845
23542	ENSG00000008735	MAPK8IP2	mitogen-activated protein kinase 8 interacting protein 2	-0.675679	5.09862	38.685	0.000182536	0.00333347
5316	ENSG00000160199	PKNOX1	PBX/knotted 1 homeobox 1	0.640607	4.72039	38.6948	0.000182369	0.00333347
5064	ENSG00000099864	PALM	paralemmin	-0.78465	5.29727	38.6277	0.000183516	0.00334788
729830	ENSG00000164142	FHIP1A	FHF complex subunit HOOK interacting protein 1A	-0.668725	4.28297	38.5466	0.000184914	0.00336988
131408	ENSG00000175182	FAM131A	family with sequence similarity 131 member A	-0.623908	3.74483	38.4955	0.000185799	0.00337901
152518	ENSG00000170448	NFXL1	nuclear transcription factor, X-box binding like 1	0.558163	4.57945	38.5026	0.000185677	0.00337901
101927559	ENSG00000277449	CEBPB-AS1	CEBPB antisense RNA 1	0.999468	1.5506	38.4672	0.000186294	0.00338101
57146	ENSG00000011638	LDAF1	lipid droplet assembly factor 1	-0.527513	6.10324	38.4734	0.000186186	0.00338101
3569	ENSG00000136244	IL6	interleukin 6	1.2319	1.3075	38.4198	0.000187123	0.00339209
578	ENSG00000030110	BAK1	BCL2 antagonist/killer 1	-0.804863	5.96336	38.4061	0.000187364	0.00339209
9123	ENSG00000141526	SLC16A3	solute carrier family 16 member 3	-0.513781	4.98955	38.3993	0.000187484	0.00339209
57669	ENSG00000115109	EPB41L5	erythrocyte membrane protein band 4.1 like 5	-0.584379	8.28295	38.3667	0.000188059	0.003399
219	ENSG00000137124	ALDH1B1	aldehyde dehydrogenase 1 family member B1	0.711024	4.98441	38.3153	0.000188971	0.00340626
23195	ENSG00000112159	MDN1	midasin AAA ATPase 1	0.606717	6.96332	38.3292	0.000188722	0.00340626
30850	ENSG00000109089	CDR2L	cerebellar degeneration related protein 2 like	-0.593075	4.75265	38.3003	0.000189237	0.00340626
7678	ENSG00000196418	ZNF124	zinc finger protein 124	0.640118	3.70031	38.3061	0.000189133	0.00340626
399473	ENSG00000188766	SPRED3	sprouty related EVH1 domain containing 3	-1.84986	1.52036	38.2853	0.000189505	0.0034076
56894	ENSG00000160216	AGPAT3	1-acylglycerol-3-phosphate O-acyltransferase 3	-0.444378	6.8862	38.2579	0.000189993	0.00341288
79833	ENSG00000152147	GEMIN6	gem nuclear organelle associated protein 6	0.593644	4.56271	38.1475	0.000191982	0.00344508
79954	ENSG00000115761	NOL10	nucleolar protein 10	0.482161	5.96173	38.0956	0.000192925	0.00345847
105374860	NA	NA	NA	1.64402	0.425285	37.9635	0.000195353	0.00349487
64101	ENSG00000128594	LRRC4	leucine rich repeat containing 4	1.43654	0.264714	37.9714	0.000195207	0.00349487
54888	ENSG00000037474	NSUN2	NOP2/Sun RNA methyltransferase 2	0.497551	7.89772	37.9423	0.000195747	0.00349835
29088	ENSG00000137547	MRPL15	mitochondrial ribosomal protein L15	0.678755	5.94049	37.8867	0.000196782	0.00350972
85019	ENSG00000134490	TMEM241	transmembrane protein 241	0.579483	4.80581	37.8959	0.00019661	0.00350972
3156	ENSG00000113161	HMGCR	3-hydroxy-3-methylglutaryl-CoA reductase	0.596609	7.17056	37.832	0.000197808	0.00352443
3667	ENSG00000169047	IRS1	insulin receptor substrate 1	0.584292	8.55189	37.7639	0.000199093	0.00354373
26747	ENSG00000083635	NUFIP1	nuclear FMR1 interacting protein 1	0.693185	4.70774	37.633	0.000201593	0.00357747
58513	ENSG00000127527	EPS15L1	epidermal growth factor receptor pathway substrate 15 like 1	0.476607	7.00127	37.6327	0.000201599	0.00357747
9646	ENSG00000198730	CTR9	CTR9 homolog, Paf1/RNA polymerase II complex component	0.668991	5.92994	37.6356	0.000201543	0.00357747
25937	ENSG00000018408	WWTR1	WW domain containing transcription regulator 1	-0.660532	5.38854	37.6213	0.000201818	0.00357774
2035	ENSG00000159023	EPB41	erythrocyte membrane protein band 4.1	-0.520021	5.12807	37.5904	0.000202416	0.00358195
2288	ENSG00000004478	FKBP4	FKBP prolyl isomerase 4	0.788228	8.63736	37.5879	0.000202463	0.00358195
57404	ENSG00000119004	CYP20A1	cytochrome P450 family 20 subfamily A member 1	0.58703	4.63508	37.5692	0.000202827	0.00358477
389692	ENSG00000182759	MAFA	MAF bZIP transcription factor A	-0.927696	2.08575	37.5322	0.000203546	0.00359387
139065	ENSG00000179542	SLITRK4	SLIT and NTRK like family member 4	1.2521	1.15736	37.4603	0.000204951	0.00361504
11264	ENSG00000101417	PXMP4	peroxisomal membrane protein 4	-0.599468	4.71976	37.301	0.000208112	0.00366711
90957	ENSG00000163214	DHX57	DExH-box helicase 57	0.467228	5.26666	37.2867	0.000208397	0.00366846
60528	ENSG00000006744	ELAC2	elaC ribonuclease Z 2	0.445834	6.77192	37.2668	0.000208798	0.00367183
2099	ENSG00000091831	ESR1	estrogen receptor 1	-0.869736	7.80154	37.4784	0.000209805	0.00368217
55454	ENSG00000169826	CSGALNACT2	chondroitin sulfate N-acetylgalactosaminyltransferase 2	0.625057	4.34647	37.2234	0.000209671	0.00368217
8869	ENSG00000115525	ST3GAL5	ST3 beta-galactoside alpha-2,3-sialyltransferase 5	-0.646213	4.09032	37.1971	0.000210205	0.0036855
4915	ENSG00000148053	NTRK2	neurotrophic receptor tyrosine kinase 2	4.29541	-0.798855	37.1484	0.000211195	0.00369892
57645	ENSG00000143157	POGK	pogo transposable element derived with KRAB domain	0.433473	7.19393	37.1388	0.000211391	0.00369892
11151	ENSG00000102879	CORO1A	coronin 1A	-0.724048	4.77014	37.1183	0.00021181	0.00370256
402682	ENSG00000176125	UFSP1	UFM1 specific peptidase 1 (inactive)	0.924476	2.67162	37.0729	0.000212741	0.00371514
22807	ENSG00000030419	IKZF2	IKAROS family zinc finger 2	-0.872643	4.78819	37.015	0.000213936	0.0037323
3572	ENSG00000134352	IL6ST	interleukin 6 cytokine family signal transducer	1.42096	5.75162	44.4921	0.000214672	0.00374142
8817	ENSG00000156427	FGF18	fibroblast growth factor 18	1.4625	1.55354	36.9588	0.000215104	0.00374524
3714	ENSG00000184916	JAG2	jagged canonical Notch ligand 2	-1.08898	5.00787	38.9364	0.000215808	0.00375237
8456	ENSG00000109101	FOXN1	forkhead box N1	2.22509	0.0864553	36.9187	0.000215941	0.00375237
64328	ENSG00000132953	XPO4	exportin 4	0.522094	6.90678	36.8776	0.000216804	0.00375993
9630	ENSG00000156049	GNA14	G protein subunit alpha 14	0.767489	3.30057	36.8806	0.000216741	0.00375993
84722	ENSG00000134222	PSRC1	proline and serine rich coiled-coil 1	-0.626301	3.99091	36.8389	0.000217622	0.00377039
3607	ENSG00000141568	FOXK2	forkhead box K2	0.425354	7.14695	36.7825	0.000218819	0.00378367
80018	ENSG00000111300	NAA25	N-alpha-acetyltransferase 25, NatB auxiliary subunit	0.456692	6.28166	36.7863	0.000218737	0.00378367
55787	ENSG00000086712	TXLNG	taxilin gamma	0.514829	5.76834	36.736	0.000219811	0.00379709
84524	ENSG00000144161	ZC3H8	zinc finger CCCH-type containing 8	0.662619	4.63361	36.7231	0.000220087	0.00379812
4248	ENSG00000128268	MGAT3	beta-1,4-mannosyl-glycoprotein 4-beta-N-acetylglucosaminyltransferase	1.42158	1.29415	36.5417	0.00022402	0.00385842
54552	ENSG00000130119	GNL3L	G protein nucleolar 3 like	0.447025	5.83638	36.5437	0.000223977	0.00385842
100506637	ENSG00000224424	PRKAR2A-AS1	PRKAR2A antisense RNA 1	-1.39746	0.847485	36.4867	0.000225231	0.00387005
55311	ENSG00000167685	ZNF444	zinc finger protein 444	-0.476791	5.76395	36.488	0.000225202	0.00387005
5583	ENSG00000027075	PRKCH	protein kinase C eta	-0.482459	5.53044	36.481	0.000225356	0.00387005
163051	ENSG00000242852	ZNF709	zinc finger protein 709	-0.9366	2.28073	36.445	0.000226153	0.00387994
29941	ENSG00000160447	PKN3	protein kinase N3	-0.672913	3.29835	36.4347	0.000226381	0.00388006
8460	ENSG00000169902	TPST1	tyrosylprotein sulfotransferase 1	-0.777012	3.13987	36.3487	0.000228302	0.00390918
23332	ENSG00000074054	CLASP1	cytoplasmic linker associated protein 1	-0.54176	6.24469	36.3044	0.000229299	0.00392242
57662	ENSG00000076826	CAMSAP3	calmodulin regulated spectrin associated protein family member 3	-0.445059	5.74316	36.2743	0.000229978	0.00393021
23022	ENSG00000129116	PALLD	palladin, cytoskeletal associated protein	0.595553	5.68987	36.247	0.000230596	0.00393695
64219	ENSG00000181191	PJA1	praja ring finger ubiquitin ligase 1	-0.596987	3.63511	36.1773	0.000232189	0.00396028
23031	ENSG00000099308	MAST3	microtubule associated serine/threonine kinase 3	-0.957877	4.36482	36.2107	0.000232768	0.0039663
54785	ENSG00000196544	BORCS6	BLOC-1 related complex subunit 6	-0.659306	4.07886	36.1175	0.000233563	0.003976
255488	ENSG00000137393	RNF144B	ring finger protein 144B	-0.708562	4.49668	36.0854	0.000234305	0.00397749
3663	ENSG00000128604	IRF5	interferon regulatory factor 5	-0.758213	4.53116	36.0746	0.000234556	0.00397749
84552	ENSG00000178184	PARD6G	par-6 family cell polarity regulator gamma	-0.904524	2.70353	36.086	0.000234291	0.00397749
8650	ENSG00000133961	NUMB	NUMB endocytic adaptor protein	-0.470109	6.5603	36.0759	0.000234524	0.00397749
8614	ENSG00000113739	STC2	stanniocalcin 2	0.983194	7.9168	37.9128	0.00023495	0.00398033
30846	ENSG00000024422	EHD2	EH domain containing 2	-0.972863	3.69564	36.0446	0.000235253	0.00398163
149466	ENSG00000253313	C1orf210	chromosome 1 open reading frame 210	-0.641897	3.2452	36.0295	0.000235604	0.00398373
124402	ENSG00000153443	UBALD1	UBA like domain containing 1	0.498093	5.30422	36.0004	0.000236284	0.00398759
51531	ENSG00000136932	TRMO	tRNA methyltransferase O	0.693773	4.09832	36.0003	0.000236286	0.00398759
84961	ENSG00000108306	FBXL20	F-box and leucine rich repeat protein 20	-0.666601	4.20896	35.9576	0.000237289	0.00400067
130574	ENSG00000187123	LYPD6	LY6/PLAUR domain containing 6	1.06845	6.31484	39.1225	0.00023767	0.00400175
57050	ENSG00000132467	UTP3	UTP3 small subunit processome component	0.507894	5.89589	35.9162	0.000238264	0.00400175
65095	ENSG00000129347	KRI1	KRI1 homolog	0.532396	5.15698	35.9326	0.000237878	0.00400175
6926	ENSG00000135111	TBX3	T-box transcription factor 3	-1.05754	3.06648	35.9249	0.000238061	0.00400175
79572	ENSG00000133657	ATP13A3	ATPase 13A3	0.654187	7.068	35.8696	0.00023937	0.00401648
7054	ENSG00000180176	TH	tyrosine hydroxylase	1.24079	1.91244	35.8547	0.000239725	0.00401859
138199	ENSG00000156017	CARNMT1	carnosine N-methyltransferase 1	0.659662	4.63762	35.7392	0.000242497	0.00405732
5753	ENSG00000101213	PTK6	protein tyrosine kinase 6	-0.585931	5.08275	35.7468	0.000242313	0.00405732
10613	ENSG00000107566	ERLIN1	ER lipid raft associated 1	0.465793	5.71752	35.717	0.000243033	0.00406243
1365	ENSG00000165215	CLDN3	claudin 3	-0.571951	7.24568	35.6736	0.000244089	0.00407512
55915	ENSG00000132434	LANCL2	LanC like glutathione S-transferase 2	0.87113	4.87493	35.6572	0.000244489	0.00407512
84668	ENSG00000122591	HYCC1	hyccin PI4KA lipid kinase complex subunit 1	0.958581	2.68223	35.658	0.000244469	0.00407512
9060	ENSG00000198682	PAPSS2	3'-phosphoadenosine 5'-phosphosulfate synthase 2	0.419821	7.2215	35.6265	0.00024524	0.00408376
55922	ENSG00000186416	NKRF	NFKB repressing factor	0.457242	5.4605	35.6142	0.000245542	0.00408492
55922	ENSG00000292244	NKRF	NFKB repressing factor	0.457242	5.4605	35.6142	0.000245542	0.00408492
25962	ENSG00000164944	VIRMA	vir like m6A methyltransferase associated	-0.616833	7.66182	35.5481	0.00024717	0.00410811
10014	ENSG00000108840	HDAC5	histone deacetylase 5	-0.565023	4.25117	35.4441	0.000249761	0.00413996
374907	ENSG00000177191	B3GNT8	UDP-GlcNAc:betaGal beta-1,3-N-acetylglucosaminyltransferase 8	-1.57308	0.80163	35.4428	0.000249793	0.00413996
51063	ENSG00000138172	CALHM2	calcium homeostasis modulator family member 2	-0.522255	4.99133	35.4436	0.000249774	0.00413996
158405	ENSG00000165185	KIAA1958	KIAA1958	-0.622523	4.59184	35.4092	0.000250637	0.00414303
5990	ENSG00000087903	RFX2	regulatory factor X2	-1.08608	2.01342	35.4073	0.000250685	0.00414303
79595	ENSG00000136715	SAP130	Sin3A associated protein 130	-0.489918	5.9411	35.4179	0.000250418	0.00414303
9953	ENSG00000125430	HS3ST3B1	heparan sulfate-glucosamine 3-sulfotransferase 3B1	1.84455	0.375472	35.3468	0.000252214	0.00416437
10904	ENSG00000166619	BLCAP	BLCAP apoptosis inducing factor	0.539496	5.88981	35.3037	0.00025331	0.00417854
55065	ENSG00000132517	SLC52A1	solute carrier family 52 member 1	-1.19087	1.79542	35.2583	0.000254472	0.00419378
55771	ENSG00000068489	PRR11	proline rich 11	-0.554665	6.63624	35.2488	0.000254716	0.00419386
2260	ENSG00000077782	FGFR1	fibroblast growth factor receptor 1	-0.658507	4.34543	35.2291	0.000255222	0.00419533
23357	ENSG00000013523	ANGEL1	angel homolog 1	0.508182	6.31872	35.2267	0.000255283	0.00419533
2041	ENSG00000146904	EPHA1	EPH receptor A1	-0.757476	5.1537	35.1814	0.000256452	0.00421061
2041	ENSG00000284816	EPHA1	EPH receptor A1	-0.757476	5.1537	35.1814	0.000256452	0.00421061
253980	ENSG00000174943	KCTD13	potassium channel tetramerization domain containing 13	0.478628	5.4982	35.0832	0.000259013	0.00424868
7699	ENSG00000196387	ZNF140	zinc finger protein 140	0.494513	4.90597	35.0008	0.000261183	0.00428028
4938	ENSG00000089127	OAS1	2'-5'-oligoadenylate synthetase 1	-0.56754	7.2824	34.9855	0.000261589	0.00428294
84955	ENSG00000120526	NUDCD1	NudC domain containing 1	0.517073	6.34503	34.9664	0.000262095	0.00428723
84133	ENSG00000183579	ZNRF3	zinc and ring finger 3	0.64976	4.55202	34.9002	0.000263862	0.00431212
1364	ENSG00000189143	CLDN4	claudin 4	-0.592103	9.057	34.8841	0.000264297	0.00431251
4643	ENSG00000157483	MYO1E	myosin IE	0.450259	5.81246	34.8736	0.000264578	0.00431251
54913	ENSG00000178718	RPP25	ribonuclease P and MRP subunit p25	0.621814	4.52636	34.872	0.000264622	0.00431251
139324	ENSG00000165259	HDX	highly divergent homeobox	-1.25465	0.924847	34.8444	0.000265365	0.00431979
338382	ENSG00000276600	RAB7B	RAB7B, member RAS oncogene family	2.66293	-1.72291	34.8281	0.000265807	0.00431979
90488	ENSG00000151135	TMEM263	transmembrane protein 263	-0.572158	5.43045	34.8366	0.000265576	0.00431979
5820	ENSG00000249859	PVT1	Pvt1 oncogene	0.538982	5.02812	34.7847	0.000266985	0.00433492
9372	ENSG00000157077	ZFYVE9	zinc finger FYVE-type containing 9	-0.632499	4.33573	34.7308	0.000268454	0.00435475
342979	ENSG00000187867	PALM3	paralemmin 3	-0.629495	3.95733	34.7016	0.000269256	0.00436374
342979	ENSG00000288318	PALM3	paralemmin 3	-0.629495	3.95733	34.7016	0.000269256	0.00436374
6811	ENSG00000162236	STX5	syntaxin 5	-0.464299	5.61874	34.6303	0.000271225	0.00439159
23048	ENSG00000187239	FNBP1	formin binding protein 1	-0.509177	5.97543	34.6186	0.000271551	0.00439282
222950	ENSG00000166924	NYAP1	neuronal tyrosine phosphorylated phosphoinositide-3-kinase adaptor 1	-2.24504	-0.568889	34.5967	0.000272161	0.00439864
154743	ENSG00000164603	BMT2	base methyltransferase of 25S rRNA 2 homolog	-0.667038	3.96958	34.5407	0.000273726	0.00441374
388389	ENSG00000167131	CCDC103	coiled-coil domain containing 103	-1.18178	1.84054	34.5363	0.000273849	0.00441374
84787	ENSG00000133247	KMT5C	lysine methyltransferase 5C	-0.906482	4.77415	34.5935	0.000273778	0.00441374
23268	ENSG00000107554	DNMBP	dynamin binding protein	0.532517	5.35884	34.4895	0.000275166	0.0044309
8760	ENSG00000101290	CDS2	CDP-diacylglycerol synthase 2	-0.52547	5.74688	34.4799	0.000275439	0.00443125
23187	ENSG00000019144	PHLDB1	pleckstrin homology like domain family B member 1	-0.710066	3.81305	34.4221	0.000277079	0.00445354
140876	ENSG00000042062	RIPOR3	RIPOR family member 3	0.958064	4.85728	35.0047	0.000277647	0.0044586
84542	ENSG00000162929	SANBR	SANT and BTB domain regulator of CSR	-0.582447	3.61756	34.3921	0.000277936	0.00445915
51177	ENSG00000023902	PLEKHO1	pleckstrin homology domain containing O1	-0.854442	3.35431	34.354	0.000279028	0.00446942
9710	ENSG00000166398	GARRE1	granule associated Rac and RHOG effector 1	-0.747971	3.11401	34.352	0.000279084	0.00446942
9710	ENSG00000279389	GARRE1	granule associated Rac and RHOG effector 1	-0.747971	3.11401	34.352	0.000279084	0.00446942
9710	ENSG00000282735	GARRE1	granule associated Rac and RHOG effector 1	-0.747971	3.11401	34.352	0.000279084	0.00446942
91272	ENSG00000145919	BOD1	biorientation of chromosomes in cell division 1	0.570141	6.56733	34.3211	0.000279975	0.0044796
23541	ENSG00000100003	SEC14L2	SEC14 like lipid binding 2	1.65367	2.84894	36.3135	0.000282416	0.00450635
51195	ENSG00000108352	RAPGEFL1	Rap guanine nucleotide exchange factor like 1	1.511	4.81868	40.9563	0.000282021	0.00450635
652	ENSG00000125378	BMP4	bone morphogenetic protein 4	-0.817695	4.66825	34.2393	0.000282346	0.00450635
57705	ENSG00000128815	WDFY4	WDFY family member 4	1.91785	-0.267686	34.1942	0.000283665	0.00452216
440905	ENSG00000286058	FAR2P1	fatty acyl-CoA reductase 2 pseudogene 1	0.836944	2.98871	34.1748	0.000284235	0.00452714
3954	ENSG00000168924	LETM1	leucine zipper and EF-hand containing transmembrane protein 1	0.491304	6.41303	34.1655	0.000284507	0.00452737
220042	ENSG00000165490	DDIAS	DNA damage induced apoptosis suppressor	0.719302	4.6119	34.1335	0.00028545	0.00453827
7158	ENSG00000067369	TP53BP1	tumor protein p53 binding protein 1	-0.440501	6.44909	34.1011	0.000286409	0.00454529
84890	ENSG00000181915	ADO	2-aminoethanethiol dioxygenase	0.572817	5.77215	34.109	0.000286175	0.00454529
933	ENSG00000012124	CD22	CD22 molecule	1.79782	1.1621	34.086	0.000286858	0.00454831
11346	ENSG00000171992	SYNPO	synaptopodin	-0.525372	4.71725	34.0606	0.000287614	0.00455617
5027	ENSG00000089041	P2RX7	purinergic receptor P2X 7	2.18816	0.0441796	34.0235	0.000288725	0.00456966
54898	ENSG00000197977	ELOVL2	ELOVL fatty acid elongase 2	1.5865	1.28885	33.9863	0.000289841	0.00458319
339287	ENSG00000188895	MSL1	MSL complex subunit 1	-0.404138	6.76942	33.9412	0.000291204	0.00459647
388796	ENSG00000196756	SNHG17	small nucleolar RNA host gene 17	0.537693	4.04522	33.9493	0.000290959	0.00459647
112858	ENSG00000172315	TP53RK	TP53 regulating kinase	0.525379	5.72832	33.9177	0.000291917	0.00460359
23186	ENSG00000089902	RCOR1	REST corepressor 1	-0.409631	6.81936	33.8222	0.000294834	0.0046345
29984	ENSG00000173156	RHOD	ras homolog family member D	0.573334	5.27782	33.8316	0.000294545	0.0046345
4163	ENSG00000171444	MCC	MCC regulator of WNT signaling pathway	-0.673893	3.96798	33.8116	0.000295161	0.0046345
5154	ENSG00000197461	PDGFA	platelet derived growth factor subunit A	-0.591908	5.1153	33.8132	0.000295112	0.0046345
5652	ENSG00000052344	PRSS8	serine protease 8	-0.769302	8.06391	33.8058	0.00029534	0.0046345
57600	ENSG00000052795	FNIP2	folliculin interacting protein 2	0.875456	3.37652	33.8019	0.00029546	0.0046345
11238	ENSG00000169239	CA5B	carbonic anhydrase 5B	-0.687604	4.08488	33.7732	0.000296344	0.00463561
23545	ENSG00000185344	ATP6V0A2	ATPase H+ transporting V0 subunit a2	0.471198	5.15573	33.7716	0.000296395	0.00463561
27173	ENSG00000143570	SLC39A1	solute carrier family 39 member 1	-0.472476	7.5914	33.7612	0.000296718	0.00463561
5433	ENSG00000144231	POLR2D	RNA polymerase II subunit D	0.477047	6.10164	33.7581	0.000296814	0.00463561
55527	ENSG00000141965	FEM1A	fem-1 homolog A	0.541633	5.5868	33.7569	0.00029685	0.00463561
57678	ENSG00000119927	GPAM	glycerol-3-phosphate acyltransferase, mitochondrial	0.555485	4.4644	33.6843	0.000299113	0.0046668
23552	ENSG00000156345	CDK20	cyclin dependent kinase 20	0.609126	3.73948	33.6563	0.000299989	0.00467273
25902	ENSG00000120254	MTHFD1L	methylenetetrahydrofolate dehydrogenase (NADP+ dependent) 1 like	0.524265	5.85222	33.6552	0.000300025	0.00467273
50855	ENSG00000102981	PARD6A	par-6 family cell polarity regulator alpha	-0.730481	3.04303	33.6296	0.00030083	0.00467983
51601	ENSG00000144182	LIPT1	lipoyltransferase 1	0.758401	2.65749	33.6153	0.00030128	0.00467983
6513	ENSG00000117394	SLC2A1	solute carrier family 2 member 1	0.824319	7.39597	34.1431	0.000301037	0.00467983
2925	ENSG00000126010	GRPR	gastrin releasing peptide receptor	2.39563	-1.34359	33.5723	0.000302642	0.00469684
1767	ENSG00000039139	DNAH5	dynein axonemal heavy chain 5	0.858834	2.04724	33.5495	0.000303369	0.00470396
2731	ENSG00000178445	GLDC	glycine decarboxylase	1.07863	1.42163	33.5077	0.000304703	0.00472049
10678	ENSG00000170340	B3GNT2	UDP-GlcNAc:betaGal beta-1,3-N-acetylglucosaminyltransferase 2	-0.440953	5.70902	33.4358	0.000307017	0.00475213
146057	ENSG00000128881	TTBK2	tau tubulin kinase 2	-0.836083	3.42893	33.401	0.000308144	0.00475283
3927	ENSG00000002834	LASP1	LIM and SH3 protein 1	-0.462704	7.76692	33.4061	0.000307979	0.00475283
5058	ENSG00000149269	PAK1	p21 (RAC1) activated kinase 1	-0.598038	3.98879	33.408	0.000307917	0.00475283
91298	ENSG00000133641	RLIG1	RNA 5'-phosphate and 3'-OH ligase 1	0.672276	4.37495	33.4158	0.000307663	0.00475283
6720	ENSG00000072310	SREBF1	sterol regulatory element binding transcription factor 1	-0.501823	7.96185	33.3574	0.000309562	0.00477051
54961	ENSG00000172830	SSH3	slingshot protein phosphatase 3	-0.402829	6.91716	33.3009	0.000311415	0.00479486
57476	ENSG00000023171	GRAMD1B	GRAM domain containing 1B	1.69577	0.566722	33.2462	0.000313219	0.00481842
7852	ENSG00000121966	CXCR4	C-X-C motif chemokine receptor 4	-0.495009	4.65067	33.226	0.000313889	0.00482449
54491	ENSG00000145569	OTULINL	OTU deubiquitinase with linear linkage specificity like	-0.610711	3.96339	33.2062	0.000314548	0.0048304
92691	ENSG00000163449	TMEM169	transmembrane protein 169	-0.885488	2.16346	33.19	0.00031509	0.0048345
55720	ENSG00000167721	TSR1	TSR1 ribosome maturation factor	0.45258	6.83146	33.142	0.000316697	0.00485491
57546	ENSG00000172840	PDP2	pyruvate dehydrogenase phosphatase catalytic subunit 2	0.531772	4.51976	33.1067	0.000317884	0.00486886
83699	ENSG00000198478	SH3BGRL2	SH3 domain binding glutamate rich protein like 2	-0.492483	4.64953	33.0957	0.000318256	0.00487031
285368	ENSG00000163704	PRRT3	proline rich transmembrane protein 3	-0.46042	6.45819	33.0865	0.000318566	0.00487081
645332	ENSG00000290994	FAM86C2P	family with sequence similarity 86, member A pseudogene	1.0405	2.97721	33.0406	0.000320122	0.00489035
3845	ENSG00000133703	KRAS	KRAS proto-oncogene, GTPase	-0.582301	5.66286	33.0161	0.000320956	0.00489341
4691	ENSG00000115053	NCL	nucleolin	0.661089	9.99057	33.0102	0.000321158	0.00489341
66008	ENSG00000115993	TRAK2	trafficking kinesin protein 2	-0.431552	6.27142	33.013	0.000321063	0.00489341
26507	ENSG00000119946	CNNM1	cyclin and CBS domain divalent metal cation transport mediator 1	0.596385	4.12623	32.9219	0.000324193	0.00493279
50617	ENSG00000105929	ATP6V0A4	ATPase H+ transporting V0 subunit a4	-0.580418	4.03596	32.9187	0.000324304	0.00493279
56271	ENSG00000102409	BEX4	brain expressed X-linked 4	-0.507485	4.65859	32.8871	0.000325399	0.00494517
2077	ENSG00000105722	ERF	ETS2 repressor factor	-0.395929	6.3481	32.8484	0.000326748	0.00496126
4792	ENSG00000100906	NFKBIA	NFKB inhibitor alpha	-0.565661	8.25319	32.8405	0.000327023	0.00496126
993	ENSG00000164045	CDC25A	cell division cycle 25A	0.531804	4.20473	32.8241	0.000327595	0.00496565
54625	ENSG00000173193	PARP14	poly(ADP-ribose) polymerase family member 14	-0.692683	8.22861	32.8053	0.000328254	0.00497135
55149	ENSG00000107951	MTPAP	mitochondrial poly(A) polymerase	0.468712	5.95267	32.6368	0.000334236	0.00505758
11137	ENSG00000136045	PWP1	PWP1 homolog, endonuclein	0.507173	5.89401	32.5853	0.000336087	0.00508122
9881	ENSG00000168016	TRANK1	tetratricopeptide repeat and ankyrin repeat containing 1	-0.645799	5.79636	32.5732	0.000336527	0.0050835
56892	ENSG00000176907	TCIM	transcriptional and immune response regulator	1.0596	1.33849	32.5226	0.000338364	0.00510467
57106	ENSG00000090971	NAT14	N-acetyltransferase 14 (putative)	-0.606959	4.37603	32.5186	0.00033851	0.00510467
57711	ENSG00000186020	ZNF529	zinc finger protein 529	0.857297	3.43931	32.4863	0.00033969	0.00511808
2057	ENSG00000187266	EPOR	erythropoietin receptor	-0.585957	4.4578	32.4654	0.000340457	0.00512524
387856	ENSG00000177875	CCDC184	coiled-coil domain containing 184	-1.81438	-0.808428	32.407	0.000342609	0.00515322
10196	ENSG00000185238	PRMT3	protein arginine methyltransferase 3	0.586834	5.19219	32.3889	0.000343279	0.00515888
102724159	ENSG00000275464	LOC102724159	periodic tryptophan protein 2 homolog	0.642906	3.40016	32.3743	0.000343822	0.00516059
23075	ENSG00000133789	SWAP70	switching B cell complex subunit SWAP70	-0.585238	4.55317	32.37	0.000343981	0.00516059
27030	ENSG00000119684	MLH3	mutL homolog 3	0.555328	5.52089	32.3582	0.000344419	0.00516276
55964	ENSG00000100167	SEPTIN3	septin 3	-1.03581	2.18976	32.3292	0.000345503	0.00517459
153364	ENSG00000176055	MBLAC2	metallo-beta-lactamase domain containing 2	1.08246	3.85439	32.8405	0.000346793	0.00518625
57149	ENSG00000102897	LYRM1	LYR motif containing 1	0.541486	5.13897	32.2926	0.000346872	0.00518625
7414	ENSG00000035403	VCL	vinculin	0.54871	6.55997	32.2778	0.000347431	0.00519019
79000	ENSG00000127423	AUNIP	aurora kinase A and ninein interacting protein	0.593815	3.38115	32.2601	0.000348098	0.00519573
1999	ENSG00000163435	ELF3	E74 like ETS transcription factor 3	-0.670553	6.80791	32.2149	0.000349808	0.00520562
388906	NA	OGFRP1	opioid growth factor receptor pseudogene 1	1.5999	0.0277421	32.2272	0.00034934	0.00520562
64651	ENSG00000144655	CSRNP1	cysteine and serine rich nuclear protein 1	-0.513165	4.63678	32.219	0.000349651	0.00520562
9138	ENSG00000076928	ARHGEF1	Rho guanine nucleotide exchange factor 1	-0.451797	5.73141	32.2034	0.000350242	0.00520562
9263	ENSG00000164543	STK17A	serine/threonine kinase 17a	0.751327	4.04803	32.2094	0.000350014	0.00520562
1374	ENSG00000110090	CPT1A	carnitine palmitoyltransferase 1A	-0.483977	7.91123	32.1796	0.000351151	0.00521275
23105	ENSG00000053108	FSTL4	follistatin like 4	0.800472	3.13569	32.1753	0.000351315	0.00521275
23499	ENSG00000127603	MACF1	microtubule actin crosslinking factor 1	0.588411	7.51379	32.1392	0.000352696	0.00522205
379	ENSG00000175906	ARL4D	ADP ribosylation factor like GTPase 4D	-1.36921	0.611726	32.1356	0.000352833	0.00522205
7357	ENSG00000148154	UGCG	UDP-glucose ceramide glucosyltransferase	0.421778	7.0487	32.1404	0.000352648	0.00522205
22880	ENSG00000133422	MORC2	MORC family CW-type zinc finger 2	0.417106	6.61236	32.1054	0.000353993	0.00523481
196403	ENSG00000178498	DTX3	deltex E3 ubiquitin ligase 3	-0.547758	5.05865	32.0931	0.000354467	0.00523543
3354	ENSG00000168830	HTR1E	5-hydroxytryptamine receptor 1E	1.49904	1.54201	32.0889	0.000354631	0.00523543
24144	ENSG00000100109	TFIP11	tuftelin interacting protein 11	0.439248	5.6155	32.0807	0.000354947	0.0052357
1352	ENSG00000006695	COX10	cytochrome c oxidase assembly factor heme A:farnesyltransferase COX10	0.537598	4.45139	32.0062	0.000357838	0.00527391
387509	ENSG00000158292	GPR153	G protein-coupled receptor 153	-0.868311	4.37013	31.9703	0.000359244	0.00528617
64781	ENSG00000100422	CERK	ceramide kinase	-0.716847	3.32161	31.9696	0.000359272	0.00528617
7328	ENSG00000186591	UBE2H	ubiquitin conjugating enzyme E2 H	-0.417462	7.6036	31.9405	0.000360417	0.00529858
3431	ENSG00000135899	SP110	SP110 nuclear body protein	-0.489159	6.09926	31.9155	0.000361402	0.00530418
92922	ENSG00000135736	CCDC102A	coiled-coil domain containing 102A	-1.02406	2.24146	31.9222	0.000361138	0.00530418
9145	ENSG00000100321	SYNGR1	synaptogyrin 1	-0.524862	4.43759	31.8949	0.000362215	0.00531169
10915	ENSG00000113649	TCERG1	transcription elongation regulator 1	0.478685	6.51502	31.8677	0.000363297	0.00532311
8538	ENSG00000043039	BARX2	BARX homeobox 2	0.746918	3.54649	31.8541	0.000363838	0.00532659
79674	ENSG00000197415	VEPH1	ventricular zone expressed PH domain containing 1	1.40373	2.75917	32.3224	0.000364212	0.00532762
3182	ENSG00000197451	HNRNPAB	heterogeneous nuclear ribonucleoprotein A/B	0.52948	8.82818	31.8158	0.000365369	0.0053401
10146	ENSG00000145907	G3BP1	G3BP stress granule assembly factor 1	0.575093	7.68785	31.762	0.000367529	0.0053672
1808	ENSG00000092964	DPYSL2	dihydropyrimidinase like 2	-0.651705	4.95814	31.7169	0.000369354	0.00538938
1742	ENSG00000132535	DLG4	discs large MAGUK scaffold protein 4	-0.787486	4.23581	31.6402	0.000372485	0.00542954
65244	ENSG00000123352	SPATS2	spermatogenesis associated serine rich 2	-0.42103	6.2729	31.6343	0.000372724	0.00542954
6674	ENSG00000104450	SPAG1	sperm associated antigen 1	0.637997	4.81288	31.6188	0.000373362	0.00543431
149076	ENSG00000160094	ZNF362	zinc finger protein 362	-0.460293	5.35172	31.5866	0.000374689	0.00544461
79798	ENSG00000140691	ARMC5	armadillo repeat containing 5	0.476636	6.29928	31.5934	0.000374411	0.00544461
3949	ENSG00000130164	LDLR	low density lipoprotein receptor	0.447971	7.61282	31.5436	0.000376473	0.00546601
10061	ENSG00000033050	ABCF2	ATP binding cassette subfamily F member 2	0.505732	6.87643	31.505	0.000378079	0.00547067
22809	ENSG00000169136	ATF5	activating transcription factor 5	0.767543	5.86618	31.5466	0.000378319	0.00547067
5601	ENSG00000050748	MAPK9	mitogen-activated protein kinase 9	-0.404719	6.57409	31.4985	0.00037835	0.00547067
57716	ENSG00000105227	PRX	periaxin	-0.739979	2.58892	31.5	0.000378289	0.00547067
64412	ENSG00000125812	GZF1	GDNF inducible zinc finger protein 1	0.431825	5.59914	31.5127	0.000377759	0.00547067
10229	ENSG00000167186	COQ7	coenzyme Q7, hydroxylase	0.493665	4.96062	31.4345	0.000381037	0.00550499
10947	ENSG00000070718	AP3M2	adaptor related protein complex 3 subunit mu 2	0.514603	4.29332	31.399	0.000382542	0.00551038
1267	ENSG00000173786	CNP	2',3'-cyclic nucleotide 3' phosphodiesterase	-0.538804	4.9893	31.3961	0.000382665	0.00551038
140	ENSG00000282608	ADORA3	adenosine A3 receptor	3.21989	-1.8902	31.4005	0.000382478	0.00551038
4077	ENSG00000188554	NBR1	NBR1 autophagy cargo receptor	-0.428653	6.97535	31.4148	0.000381871	0.00551038
51363	ENSG00000182022	CHST15	carbohydrate sulfotransferase 15	-0.478327	6.69825	31.3753	0.000383546	0.00551853
83590	ENSG00000164897	TMUB1	transmembrane and ubiquitin like domain containing 1	-0.487577	5.84711	31.3559	0.000384371	0.00552589
23780	ENSG00000128335	APOL2	apolipoprotein L2	-0.51938	5.08598	31.338	0.000385136	0.00553236
57822	ENSG00000158055	GRHL3	grainyhead like transcription factor 3	-0.555354	4.02928	31.33	0.000385479	0.00553276
241	ENSG00000132965	ALOX5AP	arachidonate 5-lipoxygenase activating protein	2.57463	-1.43606	31.2884	0.000387262	0.00555381
3691	ENSG00000132470	ITGB4	integrin subunit beta 4	-0.685218	7.47269	31.2789	0.000387672	0.00555403
6591	ENSG00000019549	SNAI2	snail family transcriptional repressor 2	2.22656	-0.127189	31.2734	0.000387909	0.00555403
7627	ENSG00000162086	ZNF75A	zinc finger protein 75A	0.438232	5.26149	31.2474	0.000389031	0.00556555
57060	ENSG00000090097	PCBP4	poly(rC) binding protein 4	-0.654902	4.50793	31.2065	0.000390807	0.00558642
55561	ENSG00000171219	CDC42BPG	CDC42 binding protein kinase gamma	-0.613066	6.42499	31.1685	0.000392464	0.00560554
10867	ENSG00000011105	TSPAN9	tetraspanin 9	-0.608979	3.28825	31.1525	0.000393163	0.00561095
6929	ENSG00000071564	TCF3	transcription factor 3	-0.492133	7.0418	31.1272	0.000394277	0.00562228
3398	ENSG00000115738	ID2	inhibitor of DNA binding 2	-0.678032	6.42271	31.1174	0.000394707	0.00562385
84930	ENSG00000120539	MASTL	microtubule associated serine/threonine kinase like	-0.432272	6.23233	31.0772	0.000396482	0.00564457
148327	ENSG00000143578	CREB3L4	cAMP responsive element binding protein 3 like 4	-0.416805	6.18252	31.0637	0.000397082	0.00564474
55702	ENSG00000105248	YJU2	YJU2 splicing factor homolog	0.617743	4.71569	31.0624	0.000397137	0.00564474
267	ENSG00000159461	AMFR	autocrine motility factor receptor	0.493382	6.51481	31.0051	0.000399692	0.00567647
10580	ENSG00000095637	SORBS1	sorbin and SH3 domain containing 1	0.826881	2.17238	30.9931	0.00040023	0.00567951
27124	ENSG00000185133	INPP5J	inositol polyphosphate-5-phosphatase J	-0.759824	3.85142	30.9782	0.000400897	0.00568439
200407	ENSG00000175874	CREG2	cellular repressor of E1A stimulated genes 2	1.05727	1.88574	30.9658	0.000401454	0.00568696
7786	ENSG00000139625	MAP3K12	mitogen-activated protein kinase kinase kinase 12	-1.3551	5.01325	36.2136	0.000401726	0.00568696
85416	ENSG00000139800	ZIC5	Zic family member 5	0.841564	2.03857	30.95	0.000402164	0.00568859
79671	ENSG00000160703	NLRX1	NLR family member X1	-0.77311	2.72818	30.9328	0.000402944	0.00569079
85012	ENSG00000196507	TCEAL3	transcription elongation factor A like 3	-0.405488	6.25254	30.9322	0.000402968	0.00569079
90025	ENSG00000118420	UBE3D	ubiquitin protein ligase E3D	0.749735	2.42679	30.9066	0.000404129	0.00570261
6594	ENSG00000102038	SMARCA1	SWI/SNF related, matrix associated, actin dependent regulator of chromatin, subfamily a, member 1	-0.662034	4.05818	30.853	0.00040657	0.00572784
79183	ENSG00000124120	TTPAL	alpha tocopherol transfer protein like	0.444868	5.99713	30.8586	0.000406312	0.00572784
100130449	ENSG00000218416	GPC1-AS1	GPC1 antisense RNA 1	-0.623261	4.4751	30.7989	0.000409047	0.00575351
6990	ENSG00000165169	DYNLT3	dynein light chain Tctex-type 3	0.473196	4.5815	30.8033	0.000408845	0.00575351
8945	ENSG00000166167	BTRC	beta-transducin repeat containing E3 ubiquitin protein ligase	-0.581598	4.73912	30.7893	0.000409492	0.00575516
90355	ENSG00000181751	MACIR	macrophage immunometabolism regulator	0.603598	5.50948	30.7548	0.000411085	0.00577293
7743	ENSG00000136870	ZNF189	zinc finger protein 189	-0.663581	3.26143	30.7309	0.000412191	0.00578384
1408	ENSG00000121671	CRY2	cryptochrome circadian regulator 2	-0.417999	5.3378	30.7109	0.000413121	0.00579227
6764	ENSG00000166444	DENND2B	DENN domain containing 2B	-1.01903	2.24231	30.6963	0.000413804	0.00579722
1820	ENSG00000116017	ARID3A	AT-rich interaction domain 3A	-1.14776	4.98337	33.592	0.000414627	0.00580412
105371414	ENSG00000260279	LOC105371414	uncharacterized LOC105371414	0.434889	4.93683	30.6532	0.000415824	0.00581482
57529	ENSG00000243978	RTL9	retrotransposon Gag like 9	1.70034	-0.320267	30.6483	0.000416053	0.00581482
101930085	ENSG00000271122	HERPUD2-AS1	HERPUD2 antisense RNA 1	0.6627	3.77106	30.6169	0.000417533	0.00581698
124359	ENSG00000166446	CDYL2	chromodomain Y like 2	-0.437099	7.30586	30.6261	0.000417098	0.00581698
57325	ENSG00000149474	KAT14	lysine acetyltransferase 14	0.540705	5.03815	30.6198	0.000417394	0.00581698
8942	ENSG00000115919	KYNU	kynureninase	-0.44814	8.10187	30.6267	0.000417067	0.00581698
79668	ENSG00000151883	PARP8	poly(ADP-ribose) polymerase family member 8	-0.678048	5.01872	30.6063	0.000418031	0.00581931
120534	ENSG00000152219	ARL14EP	ADP ribosylation factor like GTPase 14 effector protein	0.616885	4.21586	30.571	0.000419704	0.00583336
84894	ENSG00000169783	LINGO1	leucine rich repeat and Ig domain containing 1	-0.682629	2.59699	30.5737	0.000419575	0.00583336
79711	ENSG00000196497	IPO4	importin 4	0.473821	7.56595	30.5625	0.000420108	0.00583435
79711	ENSG00000285248	IPO4	importin 4	0.473821	7.56595	30.5625	0.000420108	0.00583435
9537	ENSG00000175274	TP53I11	tumor protein p53 inducible protein 11	-0.398565	7.18453	30.5458	0.000420905	0.00584081
1073	ENSG00000165410	CFL2	cofilin 2	-0.653039	4.62913	30.5353	0.000421405	0.00584313
55035	ENSG00000198000	NOL8	nucleolar protein 8	0.764511	6.27748	30.6169	0.000422393	0.00585221
55035	ENSG00000291347	NOL8	nucleolar protein 8	0.764511	6.27748	30.6169	0.000422393	0.00585221
84909	ENSG00000148120	AOPEP	aminopeptidase O (putative)	0.503774	5.31518	30.4983	0.000423178	0.00585846
401546	ENSG00000188959	C9orf152	chromosome 9 open reading frame 152	-0.611793	3.37316	30.4836	0.000423882	0.00586001
55846	ENSG00000111203	ITFG2	integrin alpha FG-GAP repeat containing 2	0.60523	3.2452	30.4821	0.000423957	0.00586001
90060	ENSG00000147144	CCDC120	coiled-coil domain containing 120	-0.629518	4.21718	30.437	0.00042613	0.00588542
90060	ENSG00000292279	CCDC120	coiled-coil domain containing 120	-0.629518	4.21718	30.437	0.00042613	0.00588542
4477	ENSG00000263639	MSMB	microseminoprotein beta	1.06464	1.43179	30.4278	0.000426575	0.00588693
27237	ENSG00000130762	ARHGEF16	Rho guanine nucleotide exchange factor 16	-0.486323	5.16972	30.4143	0.000427232	0.00588972
4953	ENSG00000115758	ODC1	ornithine decarboxylase 1	0.757368	6.41675	30.4827	0.000427447	0.00588972
5869	ENSG00000111540	RAB5B	RAB5B, member RAS oncogene family	-0.40708	7.84601	30.3831	0.000428749	0.00589841
7772	ENSG00000278318	ZNF229	zinc finger protein 229	0.550197	4.61602	30.3888	0.000428474	0.00589841
3400	ENSG00000172201	ID4	inhibitor of DNA binding 4	1.07405	1.69904	30.3682	0.000429478	0.00590381
51734	ENSG00000198736	MSRB1	methionine sulfoxide reductase B1	-0.617943	5.69877	30.3431	0.000430705	0.00591605
51734	ENSG00000291928	MSRB1	methionine sulfoxide reductase B1	-0.617943	5.69877	30.3431	0.000430705	0.00591605
6723	ENSG00000116649	SRM	spermidine synthase	0.517546	6.34582	30.3119	0.000432242	0.00593252
1945	ENSG00000243364	EFNA4	ephrin A4	-0.716517	3.53196	30.2777	0.000433931	0.00595077
246330	ENSG00000174516	PELI3	pellino E3 ubiquitin protein ligase family member 3	-0.631592	3.34489	30.2666	0.000434477	0.00595077
85002	ENSG00000186523	FAM86B1	family with sequence similarity 86 member B1	1.18902	1.78742	30.2644	0.000434588	0.00595077
25879	ENSG00000164934	DCAF13	DDB1 and CUL4 associated factor 13	0.679886	6.94056	30.2381	0.000435894	0.00596401
54606	ENSG00000136271	DDX56	DEAD-box helicase 56	0.496377	6.41858	30.2187	0.000436863	0.00597261
119587	ENSG00000121898	CPXM2	carboxypeptidase X, M14 family member 2	1.11968	1.26987	30.2093	0.000437329	0.00597434
23060	ENSG00000180357	ZNF609	zinc finger protein 609	-0.428409	7.0834	30.1901	0.000438294	0.00598286
79094	ENSG00000128965	CHAC1	ChaC glutathione specific gamma-glutamylcyclotransferase 1	0.68976	2.70102	30.1644	0.000439583	0.0059958
10098	ENSG00000168785	TSPAN5	tetraspanin 5	1.20083	2.71255	30.1429	0.000440665	0.00600383
1103	ENSG00000070748	CHAT	choline O-acetyltransferase	6.57303	-2.64955	41.2712	0.000440971	0.00600383
23170	ENSG00000100304	TTLL12	tubulin tyrosine ligase like 12	0.436065	5.96535	30.1194	0.000441851	0.00600383
286042	ENSG00000173295	FAM86B3P	family with sequence similarity 86, member A pseudogene	1.60821	2.62235	31.7032	0.000441592	0.00600383
286042	ENSG00000285119	FAM86B3P	family with sequence similarity 86, member A pseudogene	1.60821	2.62235	31.7032	0.000441592	0.00600383
286042	ENSG00000291049	FAM86B3P	family with sequence similarity 86, member A pseudogene	1.60821	2.62235	31.7032	0.000441592	0.00600383
340533	ENSG00000050030	NEXMIF	neurite extension and migration factor	-1.58988	0.340679	30.1059	0.000442537	0.00600383
57338	ENSG00000154118	JPH3	junctophilin 3	-0.511927	4.44349	30.1054	0.000442563	0.00600383
57524	ENSG00000167971	CASKIN1	CASK interacting protein 1	-1.4794	2.95497	31.7673	0.000442244	0.00600383
201626	ENSG00000174840	PDE12	phosphodiesterase 12	0.45119	5.51492	30.0961	0.000443034	0.00600557
6324	ENSG00000105711	SCN1B	sodium voltage-gated channel beta subunit 1	-0.50519	4.3544	30.0656	0.000444584	0.00601796
90627	ENSG00000133121	STARD13	StAR related lipid transfer domain containing 13	0.834836	5.89952	30.9156	0.000444633	0.00601796
29923	ENSG00000135245	HILPDA	hypoxia inducible lipid droplet associated	-0.774271	6.89426	30.5195	0.000446268	0.00603543
7391	ENSG00000158773	USF1	upstream transcription factor 1	-0.456755	5.34133	30.0209	0.000446873	0.00603897
333929	ENSG00000185669	SNAI3	snail family transcriptional repressor 3	-1.13575	1.20854	29.9938	0.000448268	0.00605317
5467	ENSG00000112033	PPARD	peroxisome proliferator activated receptor delta	-0.487812	4.48605	29.9861	0.000448662	0.00605383
3936	ENSG00000136167	LCP1	lymphocyte cytosolic protein 1	0.439958	6.066	29.9787	0.000449044	0.00605433
23239	ENSG00000081913	PHLPP1	PH domain and leucine rich repeat protein phosphatase 1	-0.8107	2.98826	29.9433	0.000450879	0.00607442
79583	ENSG00000205084	TMEM231	transmembrane protein 231	0.4875	4.45185	29.934	0.000451361	0.00607625
339122	ENSG00000172780	RAB43	RAB43, member RAS oncogene family	-0.865054	2.16667	29.906	0.000452819	0.00608805
79805	ENSG00000143494	VASH2	vasohibin 2	-1.1541	1.6507	29.9039	0.00045293	0.00608805
84915	ENSG00000139438	FAM222A	family with sequence similarity 222 member A	0.665027	2.94546	29.8919	0.000453556	0.00609179
283248	ENSG00000167771	RCOR2	REST corepressor 2	-1.7388	3.11596	33.7116	0.000454314	0.00609732
23596	ENSG00000054277	OPN3	opsin 3	0.798589	4.06219	29.8465	0.000455935	0.00610508
23596	ENSG00000203668	OPN3	opsin 3	0.798589	4.06219	29.8465	0.000455935	0.00610508
84969	ENSG00000124191	TOX2	TOX high mobility group box family member 2	-1.0223	1.16908	29.8548	0.000455499	0.00610508
8669	ENSG00000104131	EIF3J	eukaryotic translation initiation factor 3 subunit J	0.530297	7.08146	29.8514	0.000455677	0.00610508
2781	ENSG00000128266	GNAZ	G protein subunit alpha z	-1.01568	2.48714	29.8377	0.0004564	0.00610665
6911	ENSG00000149922	TBX6	T-box transcription factor 6	-0.729375	2.5089	29.8208	0.00045729	0.0061139
23112	ENSG00000100354	TNRC6B	trinucleotide repeat containing adaptor 6B	-0.646968	5.13879	29.8024	0.000458261	0.00612223
81857	ENSG00000104973	MED25	mediator complex subunit 25	-0.519965	5.17345	29.7278	0.000462234	0.00617062
10969	ENSG00000117395	EBNA1BP2	EBNA1 binding protein 2	0.487844	5.79086	29.6969	0.000463893	0.00617399
23710	ENSG00000139112	GABARAPL1	GABA type A receptor associated protein like 1	-0.60422	3.225	29.7059	0.000463405	0.00617399
79885	ENSG00000163517	HDAC11	histone deacetylase 11	0.447876	5.66425	29.7064	0.000463381	0.00617399
83541	ENSG00000125898	FAM110A	family with sequence similarity 110 member A	-0.525057	5.32579	29.6978	0.000463844	0.00617399
3815	ENSG00000157404	KIT	KIT proto-oncogene, receptor tyrosine kinase	2.50624	-0.358102	29.6713	0.00046527	0.00618763
2850	ENSG00000170837	GPR27	G protein-coupled receptor 27	0.646591	3.005	29.6534	0.000466235	0.00619578
389816	ENSG00000184709	LRRC26	leucine rich repeat containing 26	-0.659446	3.7914	29.6085	0.00046867	0.00622343
3364	ENSG00000136273	HUS1	HUS1 checkpoint clamp component	0.62497	3.62906	29.5686	0.00047085	0.00623823
494143	ENSG00000143942	CHAC2	ChaC glutathione specific gamma-glutamylcyclotransferase 2	0.997418	3.58269	29.5968	0.000470425	0.00623823
54433	ENSG00000109534	GAR1	GAR1 ribonucleoprotein	0.60532	4.97708	29.5695	0.000470798	0.00623823
27134	ENSG00000105289	TJP3	tight junction protein 3	-0.425645	6.10945	29.5311	0.000472906	0.00626075
80028	ENSG00000155034	FBXL18	F-box and leucine rich repeat protein 18	-0.642051	5.89636	29.5164	0.000473718	0.00626677
102606465	ENSG00000233184	DPH5-DT	DPH5 divergent transcript	1.08493	1.76825	29.4991	0.000474673	0.00626951
286207	ENSG00000160401	CFAP157	cilia and flagella associated protein 157	0.706338	2.78951	29.4993	0.00047466	0.00626951
339344	ENSG00000176182	MYPOP	Myb related transcription factor, partner of profilin	-0.636394	2.84014	29.4868	0.000475352	0.00626951
64283	ENSG00000214944	ARHGEF28	Rho guanine nucleotide exchange factor 28	1.15146	3.59463	30.4438	0.000475113	0.00626951
9788	ENSG00000170873	MTSS1	MTSS I-BAR domain containing 1	-0.765561	3.86226	29.4398	0.000477967	0.00629927
282996	ENSG00000203867	RBM20	RNA binding motif protein 20	1.61845	-0.617202	29.4203	0.000479054	0.00630887
27290	ENSG00000122711	SPINK4	serine peptidase inhibitor Kazal type 4	1.68844	-0.145996	29.3644	0.00048219	0.0063454
5352	ENSG00000152952	PLOD2	procollagen-lysine,2-oxoglutarate 5-dioxygenase 2	0.484431	7.87715	29.3409	0.000483517	0.00635598
85379	ENSG00000197077	KIAA1671	KIAA1671	-0.487262	5.72705	29.3374	0.000483717	0.00635598
100129269	NA	LINC01160	long intergenic non-protein coding RNA 1160	2.67604	-1.10475	29.3087	0.000485342	0.00637256
91584	ENSG00000221866	PLXNA4	plexin A4	1.62326	3.99135	34.9643	0.000486687	0.00638545
284615	ENSG00000272031	ANKRD34A	ankyrin repeat domain 34A	-0.626754	3.86769	29.2146	0.000490728	0.00643366
54556	ENSG00000071243	ING3	inhibitor of growth family member 3	0.841529	4.06313	29.1319	0.000495518	0.00648497
595	ENSG00000110092	CCND1	cyclin D1	0.68617	9.95571	29.1342	0.000495387	0.00648497
9564	ENSG00000050820	BCAR1	BCAR1 scaffold protein, Cas family member	-0.565852	7.76959	29.128	0.000495749	0.00648497
41	ENSG00000110881	ASIC1	acid sensing ion channel subunit 1	-0.481388	3.99786	29.0969	0.000497566	0.0065039
283991	ENSG00000185262	UBALD2	UBA like domain containing 2	-0.540044	4.6026	29.0851	0.000498259	0.00650811
100505806	ENSG00000250786	SNHG18	small nucleolar RNA host gene 18	-0.896846	1.89557	29.0563	0.000499954	0.00652055
63892	ENSG00000115970	THADA	THADA armadillo repeat containing	0.380975	5.83655	29.0608	0.000499688	0.00652055
11282	ENSG00000161013	MGAT4B	alpha-1,3-mannosyl-glycoprotein 4-beta-N-acetylglucosaminyltransferase B	-0.465638	7.286	29.0448	0.000500632	0.00652455
11282	ENSG00000284501	MGAT4B	alpha-1,3-mannosyl-glycoprotein 4-beta-N-acetylglucosaminyltransferase B	-0.465638	7.286	29.0448	0.000500632	0.00652455
1949	ENSG00000108947	EFNB3	ephrin B3	-0.677549	4.07189	29.0054	0.000502961	0.00655005
10380	ENSG00000162813	BPNT1	3'(2'), 5'-bisphosphate nucleotidase 1	-0.49133	6.17503	28.9893	0.00050392	0.00655692
618	ENSG00000236824	BCYRN1	brain cytoplasmic RNA 1	0.613052	5.2051	28.9832	0.000504281	0.00655692
79827	ENSG00000166250	CLMP	CXADR like membrane protein	2.60433	-0.918834	28.9734	0.000504867	0.00655692
84445	ENSG00000107816	LZTS2	leucine zipper tumor suppressor 2	-0.605113	5.85568	28.9715	0.000504981	0.00655692
3437	ENSG00000119917	IFIT3	interferon induced protein with tetratricopeptide repeats 3	-0.877865	6.57158	30.4947	0.000508069	0.00657756
473	ENSG00000142599	RERE	arginine-glutamic acid dipeptide repeats	-0.498144	5.95069	28.9202	0.00050805	0.00657756
57707	ENSG00000140950	MEAK7	MTOR associated protein, eak-7 homolog	-0.59346	6.00765	28.9313	0.000507388	0.00657756
9214	ENSG00000162894	FCMR	Fc mu receptor	2.45205	0.106865	28.927	0.000507647	0.00657756
11041	ENSG00000174684	B4GAT1	beta-1,4-glucuronyltransferase 1	-0.709935	4.35879	28.884	0.000510235	0.00659589
55308	ENSG00000168872	DDX19A	DEAD-box helicase 19A	0.419534	6.37704	28.8865	0.000510084	0.00659589
1017	ENSG00000123374	CDK2	cyclin dependent kinase 2	-0.392838	6.96912	28.8686	0.000511166	0.00660306
112714	ENSG00000152086	TUBA3E	tubulin alpha 3e	2.86594	0.16701	29.3144	0.00051185	0.00660366
112714	ENSG00000292120	TUBA3E	tubulin alpha 3e	2.86594	0.16701	29.3144	0.00051185	0.00660366
399687	ENSG00000196535	MYO18A	myosin XVIIIA	-0.559536	5.64414	28.8554	0.000511964	0.00660366
160760	ENSG00000196850	PPTC7	protein phosphatase targeting COQ7	0.46744	4.93433	28.8452	0.000512588	0.00660686
5939	ENSG00000076067	RBMS2	RNA binding motif single stranded interacting protein 2	-0.554123	3.65201	28.8191	0.000514178	0.00662249
25926	ENSG00000130935	NOL11	nucleolar protein 11	0.572512	7.52375	28.7849	0.000516265	0.0066445
10500	ENSG00000143434	SEMA6C	semaphorin 6C	-1.24484	1.09036	28.7646	0.000517517	0.00665574
387065	NA	HMGA1P7	high mobility group AT-hook 1 pseudogene 7	6.7532	-2.52915	39.0315	0.000518687	0.0066659
5271	ENSG00000166401	SERPINB8	serpin family B member 8	1.41568	0.882202	28.7385	0.000519123	0.00666664
55214	ENSG00000090530	P3H2	prolyl 3-hydroxylase 2	2.32915	-1.73286	28.7305	0.000519618	0.00666811
10127	ENSG00000006194	ZNF263	zinc finger protein 263	0.446821	5.73583	28.7184	0.000520364	0.00667281
5296	ENSG00000105647	PIK3R2	phosphoinositide-3-kinase regulatory subunit 2	-0.422868	7.63763	28.6621	0.000523866	0.00671282
254394	ENSG00000111877	MCM9	minichromosome maintenance 9 homologous recombination repair factor	0.517171	4.96024	28.6122	0.000526989	0.00674792
84848	NA	MIR503HG	MIR503 host gene	1.6105	0.753707	28.6005	0.00052773	0.00675248
5118	ENSG00000106333	PCOLCE	procollagen C-endopeptidase enhancer	-0.824971	3.80871	28.5925	0.00052823	0.00675396
150	ENSG00000150594	ADRA2A	adrenoceptor alpha 2A	2.44914	-1.30921	28.5741	0.000529398	0.00675505
161931	ENSG00000140955	ADAD2	adenosine deaminase domain containing 2	1.7889	-0.39572	28.5729	0.000529469	0.00675505
57545	ENSG00000048342	CC2D2A	coiled-coil and C2 domain containing 2A	0.613624	3.06456	28.5806	0.000528981	0.00675505
400508	NA	CRYM-AS1	CRYM antisense RNA 1	1.52927	0.7612	28.4738	0.000535787	0.00683071
100287896	ENSG00000254837	LIPT2-AS1	LIPT2 antisense RNA 1	0.81861	2.31957	28.4468	0.000537522	0.00684785
2683	ENSG00000086062	B4GALT1	beta-1,4-galactosyltransferase 1	0.780745	8.05401	28.6856	0.000540145	0.00686634
493812	ENSG00000228223	HCG11	HLA complex group 11	0.57959	4.16717	28.4103	0.000539879	0.00686634
493812	ENSG00000292174	HCG11	HLA complex group 11	0.57959	4.16717	28.4103	0.000539879	0.00686634
5032	ENSG00000244165	P2RY11	purinergic receptor P2Y11	1.10133	1.28723	28.4115	0.000539804	0.00686634
85476	ENSG00000168827	GFM1	G elongation factor mitochondrial 1	0.400629	6.74088	28.3329	0.000544927	0.00692211
7705	ENSG00000167635	ZNF146	zinc finger protein 146	0.760425	7.36652	28.7668	0.0005464	0.0069358
11113	ENSG00000122966	CIT	citron rho-interacting serine/threonine kinase	-0.518508	4.96158	28.2753	0.000548716	0.00695313
192111	ENSG00000247077	PGAM5	PGAM family member 5, mitochondrial serine/threonine protein phosphatase	0.419779	6.50416	28.2801	0.000548396	0.00695313
92856	ENSG00000136718	IMP4	IMP U3 small nucleolar ribonucleoprotein 4	0.538783	6.50352	28.2717	0.000548952	0.00695313
81569	ENSG00000117148	ACTL8	actin like 8	2.19175	-0.432468	28.2367	0.000551273	0.00697749
23623	ENSG00000160753	RUSC1	RUN and SH3 domain containing 1	-0.387716	6.63764	28.2264	0.000551958	0.00698114
1026	ENSG00000124762	CDKN1A	cyclin dependent kinase inhibitor 1A	-0.498548	8.45932	28.2166	0.000552609	0.00698434
80270	ENSG00000099377	HSD3B7	hydroxy-delta-5-steroid dehydrogenase, 3 beta- and steroid delta-isomerase 7	-0.405599	5.76059	28.2047	0.000553404	0.00698936
1943	ENSG00000099617	EFNA2	ephrin A2	-1.66622	0.0728596	28.1966	0.000553947	0.0069912
10745	ENSG00000116793	PHTF1	putative homeodomain transcription factor 1	-0.38588	5.91899	28.1374	0.000557921	0.00703204
9949	ENSG00000101935	AMMECR1	AMMECR nuclear protein 1	0.564419	5.50645	28.1365	0.000557984	0.00703204
84255	ENSG00000157800	SLC37A3	solute carrier family 37 member 3	0.480679	6.06287	28.128	0.00055856	0.00703425
10512	ENSG00000075223	SEMA3C	semaphorin 3C	0.561074	9.32057	28.0782	0.000561935	0.00706662
8662	ENSG00000106263	EIF3B	eukaryotic translation initiation factor 3 subunit B	0.474389	8.96421	28.0803	0.000561791	0.00706662
3127	ENSG00000198502	HLA-DRB5	major histocompatibility complex, class II, DR beta 5	0.638744	4.47536	28.0643	0.000562886	0.00707352
79666	ENSG00000175895	PLEKHF2	pleckstrin homology and FYVE domain containing 2	-0.657613	7.60119	28.0482	0.00056398	0.0070822
1107	ENSG00000170004	CHD3	chromodomain helicase DNA binding protein 3	-0.387089	8.11889	28.0317	0.000565113	0.00709137
79718	ENSG00000177565	TBL1XR1	TBL1X/Y related 1	-0.457088	6.0906	28.0005	0.000567253	0.00711314
653464	ENSG00000171943	SRGAP2C	SLIT-ROBO Rho GTPase activating protein 2C	-0.693606	3.82488	27.9546	0.000570429	0.00714786
8607	ENSG00000175792	RUVBL1	RuvB like AAA ATPase 1	0.503677	6.71623	27.9447	0.000571112	0.00715132
112	ENSG00000174233	ADCY6	adenylate cyclase 6	-0.560305	6.96906	27.9162	0.000573099	0.00716598
6949	ENSG00000070814	TCOF1	treacle ribosome biogenesis factor 1	0.450969	6.20086	27.9206	0.000572788	0.00716598
100652781	NA	SNX29P1	sorting nexin 29 pseudogene 1	1.79657	-0.855719	27.9032	0.000574002	0.00716706
254042	ENSG00000172878	METAP1D	methionyl aminopeptidase type 1D, mitochondrial	0.777373	3.02942	27.9045	0.000573915	0.00716706
254042	ENSG00000292097	METAP1D	methionyl aminopeptidase type 1D, mitochondrial	0.777373	3.02942	27.9045	0.000573915	0.00716706
1001	ENSG00000062038	CDH3	cadherin 3	-0.43697	6.90883	27.8346	0.000578823	0.00722213
23270	ENSG00000187189	TSPYL4	TSPY like 4	-0.41808	6.10539	27.8195	0.000579889	0.00723029
27130	ENSG00000119509	INVS	inversin	-0.459695	4.13612	27.7946	0.000581656	0.00724718
11063	ENSG00000039600	SOX30	SRY-box transcription factor 30	2.45187	-1.74394	27.7039	0.000588141	0.00731383
23370	ENSG00000104880	ARHGEF18	Rho/Rac guanine nucleotide exchange factor 18	0.483241	5.15314	27.6966	0.00058867	0.00731383
345557	ENSG00000182836	PLCXD3	phosphatidylinositol specific phospholipase C X domain containing 3	1.1677	1.59088	27.7059	0.000587997	0.00731383
55615	ENSG00000186654	PRR5	proline rich 5	0.594847	3.50949	27.702	0.000588277	0.00731383
55506	ENSG00000099284	MACROH2A2	macroH2A.2 histone	-0.450562	5.75414	27.6666	0.000590838	0.00733558
26503	ENSG00000119899	SLC17A5	solute carrier family 17 member 5	-0.66488	4.51423	27.6297	0.000593515	0.00735505
3274	ENSG00000113749	HRH2	histamine receptor H2	-0.898845	1.39217	27.639	0.000592838	0.00735505
9772	ENSG00000177728	TMEM94	transmembrane protein 94	-0.635269	6.47422	27.6277	0.000593662	0.00735505
142891	ENSG00000156671	SAMD8	sterile alpha motif domain containing 8	-0.462763	5.02079	27.5997	0.000595707	0.00735962
4148	ENSG00000132031	MATN3	matrilin 3	0.604684	3.84682	27.6087	0.000595042	0.00735962
51430	ENSG00000094975	SUCO	SUN domain containing ossification factor	0.591086	7.07152	27.6084	0.000595069	0.00735962
55032	ENSG00000138459	SLC35A5	solute carrier family 35 member A5	0.644538	5.13083	27.6002	0.000595668	0.00735962
54064	ENSG00000230978	LINC00160	long intergenic non-protein coding RNA 160	3.56127	-1.61867	27.579	0.000597223	0.00737317
653583	ENSG00000176531	PHLDB3	pleckstrin homology like domain family B member 3	-0.619448	4.02021	27.5593	0.000598668	0.00738581
100038246	ENSG00000236311	TLX1NB	TLX1 neighbor	-1.66979	-0.515867	27.5285	0.000600937	0.00739873
146395	ENSG00000169181	GSG1L	GSG1 like	1.34055	0.855407	27.5342	0.000600515	0.00739873
26523	ENSG00000092847	AGO1	argonaute RISC component 1	-0.476042	5.1018	27.528	0.000600979	0.00739873
6713	ENSG00000104549	SQLE	squalene epoxidase	0.435724	8.82011	27.5169	0.000601799	0.00740365
57624	ENSG00000144460	NYAP2	neuronal tyrosine-phosphorylated phosphoinositide-3-kinase adaptor 2	1.3761	0.829969	27.5073	0.000602511	0.00740722
57609	ENSG00000066084	DIP2B	disco interacting protein 2 homolog B	-0.409565	7.43282	27.4999	0.00060306	0.00740819
80183	ENSG00000102445	RUBCNL	rubicon like autophagy enhancer	2.83793	-1.57261	27.4949	0.000603433	0.00740819
1857	ENSG00000161202	DVL3	dishevelled segment polarity protein 3	-0.406394	7.22883	27.453	0.000606557	0.00743898
7029	ENSG00000114126	TFDP2	transcription factor Dp-2	-0.482318	6.09664	27.4442	0.000607212	0.00743898
9521	ENSG00000124802	EEF1E1	eukaryotic translation elongation factor 1 epsilon 1	0.582948	3.20063	27.4488	0.000606865	0.00743898
9783	ENSG00000117016	RIMS3	regulating synaptic membrane exocytosis 3	-1.32922	2.24654	27.4308	0.000608219	0.00744612
84936	ENSG00000166140	ZFYVE19	zinc finger FYVE-type containing 19	-0.467853	5.0006	27.4249	0.000608657	0.0074463
125170	ENSG00000177427	MIEF2	mitochondrial elongation factor 2	-0.580129	3.97415	27.4183	0.000609157	0.00744723
125170	ENSG00000284495	MIEF2	mitochondrial elongation factor 2	-0.580129	3.97415	27.4183	0.000609157	0.00744723
9858	ENSG00000196422	PPP1R26	protein phosphatase 1 regulatory subunit 26	-0.600785	6.08395	27.4111	0.000609695	0.00744862
92359	ENSG00000130545	CRB3	crumbs cell polarity complex component 3	-0.525293	4.38137	27.3697	0.000612826	0.00748168
4776	ENSG00000100968	NFATC4	nuclear factor of activated T cells 4	-1.35754	3.83853	30.3953	0.000615573	0.00750338
4776	ENSG00000285485	NFATC4	nuclear factor of activated T cells 4	-1.35754	3.83853	30.3953	0.000615573	0.00750338
4817	ENSG00000158793	NIT1	nitrilase 1	-0.59153	4.36018	27.3341	0.000615528	0.00750338
540	ENSG00000123191	ATP7B	ATPase copper transporting beta	-0.522506	4.64072	27.3238	0.000616312	0.00750338
80204	ENSG00000138081	FBXO11	F-box protein 11	-0.392847	6.48011	27.3272	0.000616052	0.00750338
53637	ENSG00000180739	S1PR5	sphingosine-1-phosphate receptor 5	-1.58379	-0.143001	27.3124	0.000617181	0.00750875
790	ENSG00000084774	CAD	carbamoyl-phosphate synthetase 2, aspartate transcarbamylase, and dihydroorotase	0.398434	7.24538	27.3006	0.000618088	0.00751458
9139	ENSG00000078699	CBFA2T2	CBFA2/RUNX1 partner transcriptional co-repressor 2	-0.617259	5.01952	27.2786	0.000619773	0.00752986
1198	ENSG00000179335	CLK3	CDC like kinase 3	-0.521039	6.15768	27.266	0.000620743	0.00753643
64114	ENSG00000135926	TMBIM1	transmembrane BAX inhibitor motif containing 1	-0.994281	4.04243	27.9791	0.000621885	0.00754508
2395	ENSG00000165060	FXN	frataxin	0.782008	3.09238	27.222	0.000624139	0.00756614
79089	ENSG00000168591	TMUB2	transmembrane and ubiquitin like domain containing 2	-0.550413	4.39704	27.2175	0.000624482	0.00756614
5366	ENSG00000141682	PMAIP1	phorbol-12-myristate-13-acetate-induced protein 1	0.833121	2.85334	27.1962	0.000626142	0.00758102
1965	ENSG00000134001	EIF2S1	eukaryotic translation initiation factor 2 subunit alpha	0.461957	7.56679	27.1769	0.000627643	0.00758874
2289	ENSG00000096060	FKBP5	FKBP prolyl isomerase 5	0.430079	5.59322	27.1786	0.000627509	0.00758874
79640	ENSG00000184208	C22orf46P	CTA-216E10.6	-0.490488	4.77154	27.1638	0.000628663	0.00759584
116984	ENSG00000047365	ARAP2	ArfGAP with RhoGAP domain, ankyrin repeat and PH domain 2	0.742493	4.17102	27.1499	0.000629755	0.0076038
139231	ENSG00000123575	FAM199X	family with sequence similarity 199, X-linked	-0.408843	6.67915	27.1045	0.000633324	0.00763116
388531	ENSG00000186326	RGS9BP	regulator of G protein signaling 9 binding protein	-0.866482	1.71388	27.1064	0.000633176	0.00763116
6525	ENSG00000183963	SMTN	smoothelin	-0.443901	4.78574	27.1136	0.000632602	0.00763116
83464	ENSG00000138613	APH1B	aph-1 homolog B, gamma-secretase subunit	-0.499028	5.08347	27.0895	0.000634505	0.00764015
10623	ENSG00000186141	POLR3C	RNA polymerase III subunit C	0.410309	5.89934	27.0757	0.000635601	0.00764798
123920	ENSG00000140931	CMTM3	CKLF like MARVEL transmembrane domain containing 3	-0.882829	2.25661	27.0703	0.000636026	0.00764798
51434	ENSG00000196510	ANAPC7	anaphase promoting complex subunit 7	0.414805	5.88046	27.0623	0.000636658	0.00765035
143888	ENSG00000178202	POGLUT3	protein O-glucosyltransferase 3	-0.410821	5.19163	27.0514	0.000637526	0.00765554
9873	ENSG00000137478	FCHSD2	FCH and double SH3 domains 2	-0.465301	4.90226	27.0382	0.00063858	0.00766296
1230	ENSG00000163823	CCR1	C-C motif chemokine receptor 1	-0.76601	2.23529	27.0009	0.000641557	0.00768832
57091	ENSG00000087589	CASS4	Cas scaffold protein family member 4	1.33026	0.820582	27.0008	0.000641569	0.00768832
10160	ENSG00000152767	FARP1	FERM, ARH/RhoGEF and pleckstrin domain protein 1	0.400584	5.70239	26.9901	0.000642427	0.00769336
154043	ENSG00000153721	CNKSR3	CNKSR family member 3	0.602881	3.18721	26.9631	0.000644596	0.00770883
23276	ENSG00000114648	KLHL18	kelch like family member 18	0.452013	4.96255	26.9634	0.000644572	0.00770883
151473	ENSG00000163053	SLC16A14	solute carrier family 16 member 14	-0.52286	4.26644	26.9375	0.000646663	0.00772828
4882	ENSG00000159899	NPR2	natriuretic peptide receptor 2	-0.521639	4.52248	26.9172	0.00064831	0.0077427
23348	ENSG00000088387	DOCK9	dedicator of cytokinesis 9	-0.46246	4.96207	26.884	0.000651014	0.00776971
9912	ENSG00000006740	ARHGAP44	Rho GTPase activating protein 44	-0.500174	4.49303	26.8398	0.000654631	0.00780757
23404	ENSG00000130713	EXOSC2	exosome component 2	0.503703	5.95588	26.8286	0.000655554	0.00781104
57484	ENSG00000170153	RNF150	ring finger protein 150	0.578424	3.72306	26.8255	0.000655811	0.00781104
10633	ENSG00000100276	RASL10A	RAS like family 10 member A	2.18166	-0.0241585	26.804	0.000657582	0.00782684
646862	ENSG00000269855	RNF225	ring finger protein 225	-1.40933	-0.0692898	26.7898	0.000658754	0.00783547
5101	ENSG00000184226	PCDH9	protocadherin 9	1.22102	1.56442	26.7593	0.000661291	0.00786032
266655	ENSG00000235106	BRD3OS	BRD3 opposite strand	-0.513238	4.47365	26.7308	0.000663661	0.00787783
685	ENSG00000174808	BTC	betacellulin	0.854397	2.35973	26.7329	0.000663492	0.00787783
1509	ENSG00000117984	CTSD	cathepsin D	0.524034	9.97295	26.7075	0.000665616	0.00789571
8797	ENSG00000104689	TNFRSF10A	TNF receptor superfamily member 10a	0.534415	3.77525	26.6959	0.000666592	0.00790195
5819	ENSG00000130202	NECTIN2	nectin cell adhesion molecule 2	-0.424369	7.7465	26.6888	0.000667182	0.00790361
120526	ENSG00000170946	DNAJC24	DnaJ heat shock protein family (Hsp40) member C24	0.570227	3.34443	26.6783	0.000668071	0.00790881
91966	ENSG00000197620	EOLA1	endothelium and lymphocyte associated ASCH domain 1	0.504524	4.69544	26.6398	0.000671325	0.00794198
83475	ENSG00000129932	DOHH	deoxyhypusine hydroxylase	0.589485	3.95253	26.6282	0.000672304	0.00794821
123263	ENSG00000103707	MTFMT	mitochondrial methionyl-tRNA formyltransferase	0.600586	4.08863	26.6198	0.000673016	0.00795127
23177	ENSG00000011523	CEP68	centrosomal protein 68	0.428632	4.88556	26.6039	0.000674371	0.00796192
731220	ENSG00000196460	RFX8	regulatory factor X8	2.15951	-1.2806	26.5978	0.00067489	0.0079627
26509	ENSG00000138119	MYOF	myoferlin	0.638238	8.85504	26.5754	0.000676805	0.00797994
10382	ENSG00000104833	TUBB4A	tubulin beta 4A class IVa	-1.28378	0.815461	26.5534	0.00067869	0.0079968
58497	ENSG00000143363	PRUNE1	prune exopolyphosphatase 1	-0.482072	5.81769	26.516	0.000681916	0.00802842
7866	ENSG00000214706	IFRD2	interferon related developmental regulator 2	0.45942	6.0066	26.5117	0.000682288	0.00802842
196743	ENSG00000148832	PAOX	polyamine oxidase	-0.820412	1.87988	26.4794	0.000685086	0.00805596
6737	ENSG00000132109	TRIM21	tripartite motif containing 21	-0.530456	4.49236	26.4356	0.000688908	0.00809548
27031	ENSG00000113971	NPHP3	nephrocystin 3	-0.852854	3.23795	26.4217	0.000690124	0.00810434
9473	ENSG00000130775	THEMIS2	thymocyte selection associated family member 2	-1.94648	0.600302	26.4065	0.000691461	0.00811462
154810	ENSG00000166025	AMOTL1	angiomotin like 1	0.403596	6.16429	26.393	0.000692643	0.00812307
126282	ENSG00000185361	TNFAIP8L1	TNF alpha induced protein 8 like 1	-0.715233	2.5085	26.3571	0.000695817	0.00815484
730101	ENSG00000291006	LOC730101	uncharacterized LOC730101	-0.813519	2.37699	26.3312	0.000698114	0.00817631
2729	ENSG00000001084	GCLC	glutamate-cysteine ligase catalytic subunit	0.466215	6.69575	26.2899	0.000701796	0.00821396
7690	ENSG00000172262	ZNF131	zinc finger protein 131	0.503172	6.54161	26.2634	0.000704175	0.00823631
25983	ENSG00000129460	NGDN	neuroguidin	0.418683	5.62512	26.21	0.000708995	0.00828717
55012	ENSG00000092020	PPP2R3C	protein phosphatase 2 regulatory subunit B''gamma	0.480109	4.843	26.1817	0.000711571	0.00830623
6522	ENSG00000164889	SLC4A2	solute carrier family 4 member 2	-0.404522	8.03101	26.1839	0.00071137	0.00830623
140862	ENSG00000101230	ISM1	isthmin 1	2.00495	0.136709	26.1624	0.000713333	0.00832127
29107	ENSG00000132661	NXT1	nuclear transport factor 2 like export factor 1	0.582933	5.32432	26.1569	0.000713834	0.00832159
94134	ENSG00000165322	ARHGAP12	Rho GTPase activating protein 12	-0.420503	6.94649	26.1343	0.000715899	0.00834013
10419	ENSG00000100462	PRMT5	protein arginine methyltransferase 5	0.41397	7.12835	26.1149	0.000717686	0.00835213
85397	ENSG00000135824	RGS8	regulator of G protein signaling 8	3.22254	-1.68428	26.1128	0.00071788	0.00835213
9351	ENSG00000065054	NHERF2	NHERF family PDZ scaffold protein 2	-0.45654	7.15439	26.1017	0.000718895	0.00835841
80135	ENSG00000117133	RPF1	ribosome production factor 1 homolog	0.564946	5.44741	26.0744	0.000721421	0.00838222
1826	ENSG00000171587	DSCAM	DS cell adhesion molecule	0.457324	5.1959	26.0501	0.000723676	0.00839734
1826	ENSG00000291561	DSCAM	DS cell adhesion molecule	0.457324	5.1959	26.0501	0.000723676	0.00839734
79829	ENSG00000110583	NAA40	N-alpha-acetyltransferase 40, NatD catalytic subunit	-0.656659	5.63229	26.0501	0.000723677	0.00839734
6773	ENSG00000170581	STAT2	signal transducer and activator of transcription 2	-0.792869	6.94056	27.1295	0.000726197	0.00842101
54839	ENSG00000137821	LRRC49	leucine rich repeat containing 49	1.04058	0.823781	26.0081	0.000727595	0.00842609
8886	ENSG00000088205	DDX18	DEAD-box helicase 18	0.424475	7.35593	26.0085	0.000727555	0.00842609
80267	ENSG00000116406	EDEM3	ER degradation enhancing alpha-mannosidase like protein 3	0.600922	6.46274	25.9704	0.000731134	0.0084615
55174	ENSG00000104613	INTS10	integrator complex subunit 10	0.478222	5.22877	25.9555	0.000732536	0.00847215
6832	ENSG00000156502	SUPV3L1	Suv3 like RNA helicase	0.488507	5.1444	25.9282	0.000735118	0.00849642
100130417	ENSG00000223764	LINC02593	long intergenic non-protein coding RNA 2593	-0.800961	2.80668	25.8832	0.000739401	0.00854029
51603	ENSG00000010165	METTL13	methyltransferase 13, eEF1A N-terminus and K55	0.438841	6.83219	25.8742	0.00074026	0.0085446
81558	ENSG00000121104	FAM117A	family with sequence similarity 117 member A	-0.645365	3.333	25.8534	0.000742252	0.00856197
115704	ENSG00000142459	EVI5L	ecotropic viral integration site 5 like	-0.525119	4.75951	25.8398	0.00074356	0.00857143
10079	ENSG00000054793	ATP9A	ATPase phospholipid transporting 9A (putative)	-0.436311	9.13959	25.8247	0.000745011	0.00857691
339230	ENSG00000185298	CCDC137	coiled-coil domain containing 137	0.379783	5.44991	25.828	0.000744689	0.00857691
403	ENSG00000138175	ARL3	ADP ribosylation factor like GTPase 3	0.480823	4.84926	25.8068	0.000746735	0.00859111
79683	ENSG00000175048	ZDHHC14	zinc finger DHHC-type palmitoyltransferase 14	0.682496	3.09503	25.7455	0.000752694	0.00865402
10523	ENSG00000085872	CHERP	calcium homeostasis endoplasmic reticulum protein	0.403174	6.11464	25.7221	0.000754979	0.00867461
2030	ENSG00000112759	SLC29A1	solute carrier family 29 member 1 (Augustine blood group)	0.414333	5.61594	25.7071	0.000756449	0.00868581
6578	ENSG00000174640	SLCO2A1	solute carrier organic anion transporter family member 2A1	2.57969	-1.33986	25.6856	0.000758564	0.00869873
9148	ENSG00000107954	NEURL1	neuralized E3 ubiquitin protein ligase 1	-1.0243	1.259	25.6856	0.000758562	0.00869873
79831	ENSG00000155666	KDM8	lysine demethylase 8	0.639755	2.86272	25.6775	0.000759363	0.00870221
57542	ENSG00000087448	KLHL42	kelch like family member 42	0.474413	5.60553	25.6452	0.000762556	0.0087331
2526	ENSG00000196371	FUT4	fucosyltransferase 4	0.579017	3.23419	25.6206	0.000764998	0.00875536
283358	ENSG00000139044	B4GALNT3	beta-1,4-N-acetyl-galactosaminyltransferase 3	1.90749	-1.23866	25.6059	0.000766467	0.00876646
145567	ENSG00000165914	TTC7B	tetratricopeptide repeat domain 7B	-0.470084	5.07541	25.5953	0.000767528	0.00876718
7042	ENSG00000092969	TGFB2	transforming growth factor beta 2	1.52215	3.36205	28.7764	0.000767285	0.00876718
10724	ENSG00000198408	OGA	O-GlcNAcase	0.52236	7.28655	25.5769	0.000769368	0.00878249
9166	ENSG00000147654	EBAG9	estrogen receptor binding site associated antigen 9	0.500401	5.78578	25.568	0.000770258	0.00878694
28987	ENSG00000141101	NOB1	NIN1 (RPN12) binding protein 1 homolog	0.550522	7.00366	25.5613	0.000770937	0.00878898
114794	ENSG00000166897	ELFN2	extracellular leucine rich repeat and fibronectin type III domain containing 2	-0.857706	1.66267	25.5438	0.000772695	0.00879214
114794	ENSG00000243902	ELFN2	extracellular leucine rich repeat and fibronectin type III domain containing 2	-0.857706	1.66267	25.5438	0.000772695	0.00879214
399694	ENSG00000185634	SHC4	SHC adaptor protein 4	0.933041	2.40312	25.5463	0.000772442	0.00879214
54617	ENSG00000128908	INO80	INO80 complex ATPase subunit	0.398707	6.50074	25.5436	0.000772715	0.00879214
338596	ENSG00000148488	ST8SIA6	ST8 alpha-N-acetyl-neuraminide alpha-2,8-sialyltransferase 6	0.54468	6.69762	25.509	0.000776212	0.00882621
80823	ENSG00000198908	GPRASP3	G protein-coupled receptor associated sorting protein family member 3	-0.68147	2.76268	25.4978	0.000777346	0.00883338
26166	ENSG00000132554	RGS22	regulator of G protein signaling 22	1.85995	-0.312129	25.4855	0.000778597	0.00884188
84181	ENSG00000124177	CHD6	chromodomain helicase DNA binding protein 6	-0.485332	8.13653	25.4482	0.000782402	0.00887551
91694	ENSG00000154359	LONRF1	LON peptidase N-terminal domain and ring finger 1	0.429798	5.01938	25.4466	0.000782569	0.00887551
91694	ENSG00000285360	LONRF1	LON peptidase N-terminal domain and ring finger 1	0.429798	5.01938	25.4466	0.000782569	0.00887551
64218	ENSG00000196189	SEMA4A	semaphorin 4A	-0.406974	4.97229	25.4385	0.000783399	0.0088792
3434	ENSG00000185745	IFIT1	interferon induced protein with tetratricopeptide repeats 1	-0.924354	8.54445	27.0749	0.000786809	0.0089121
346689	ENSG00000188883	KLRG2	killer cell lectin like receptor G2	-0.830793	2.44233	25.3918	0.000788206	0.00891642
90993	ENSG00000157613	CREB3L1	cAMP responsive element binding protein 3 like 1	-1.28376	2.92311	26.2542	0.000787815	0.00891642
8900	ENSG00000133101	CCNA1	cyclin A1	1.18867	0.661273	25.3644	0.00079104	0.00894272
10791	ENSG00000168899	VAMP5	vesicle associated membrane protein 5	-0.684782	3.20998	25.3476	0.000792791	0.008951
127687	ENSG00000197982	C1orf122	chromosome 1 open reading frame 122	0.600827	4.77376	25.3506	0.000792473	0.008951
9294	ENSG00000267534	S1PR2	sphingosine-1-phosphate receptor 2	-1.28984	2.13543	25.3305	0.000794565	0.00896526
3092	ENSG00000127946	HIP1	huntingtin interacting protein 1	-0.474889	7.25803	25.3054	0.00079719	0.00898052
56946	ENSG00000158636	EMSY	EMSY transcriptional repressor, BRCA2 interacting	-0.446814	5.66322	25.3029	0.00079745	0.00898052
84665	ENSG00000138347	MYPN	myopalladin	3.63307	-2.35844	25.3118	0.000796525	0.00898052
55027	ENSG00000155393	HEATR3	HEAT repeat containing 3	0.445772	4.35524	25.2511	0.000802909	0.0090362
124790	ENSG00000168517	HEXIM2	HEXIM P-TEFb complex subunit 2	-0.595544	3.03061	25.2304	0.000805091	0.00904944
130827	ENSG00000170417	TMEM182	transmembrane protein 182	0.61777	3.1319	25.2224	0.000805949	0.00904944
57570	ENSG00000126814	TRMT5	tRNA methyltransferase 5	0.428625	5.52671	25.2205	0.000806146	0.00904944
6495	ENSG00000126778	SIX1	SIX homeobox 1	-0.530098	5.11392	25.2281	0.000805338	0.00904944
29800	ENSG00000159714	ZDHHC1	zinc finger DHHC-type containing 1	-1.11785	1.05387	25.1872	0.000809689	0.00907182
55957	ENSG00000267796	LIN37	lin-37 DREAM MuvB core complex component	-0.629019	3.70063	25.1925	0.000809124	0.00907182
64856	ENSG00000179403	VWA1	von Willebrand factor A domain containing 1	-0.477411	5.05408	25.1897	0.000809427	0.00907182
10962	ENSG00000213190	MLLT11	MLLT11 transcription factor 7 cofactor	-0.585375	3.56847	25.0916	0.000819975	0.00918122
26031	ENSG00000070882	OSBPL3	oxysterol binding protein like 3	1.42168	0.493185	25.0786	0.000821387	0.00919116
1734	ENSG00000211448	DIO2	iodothyronine deiodinase 2	2.02653	-1.15391	25.0564	0.000823807	0.00920652
23096	ENSG00000124313	IQSEC2	IQ motif and Sec7 domain ArfGEF 2	-0.611661	3.87874	25.0589	0.000823531	0.00920652
215	ENSG00000101986	ABCD1	ATP binding cassette subfamily D member 1	-0.42936	5.60075	25.0441	0.000825154	0.0092157
23125	ENSG00000108509	CAMTA2	calmodulin binding transcription activator 2	-0.527114	5.91028	24.9983	0.000830175	0.00926589
11091	ENSG00000196363	WDR5	WD repeat domain 5	0.369544	7.02476	24.9567	0.000834765	0.00930832
79603	ENSG00000090661	CERS4	ceramide synthase 4	-0.436393	5.176	24.9543	0.000835036	0.00930832
115106	ENSG00000152240	HAUS1	HAUS augmin like complex subunit 1	0.609647	4.65831	24.9279	0.000837972	0.00931333
140467	ENSG00000198816	ZNF358	zinc finger protein 358	-0.664056	4.11495	24.936	0.000837066	0.00931333
153	ENSG00000043591	ADRB1	adrenoceptor beta 1	1.14943	0.717958	24.9298	0.000837763	0.00931333
255394	ENSG00000166046	TCP11L2	t-complex 11 like 2	-0.988598	2.74377	24.9229	0.000838526	0.00931333
5528	ENSG00000112640	PPP2R5D	protein phosphatase 2 regulatory subunit B'delta	-0.456827	5.8784	24.9357	0.000837108	0.00931333
730091	ENSG00000240875	LINC00886	long intergenic non-protein coding RNA 886	0.818749	3.61874	24.9217	0.000838666	0.00931333
80745	ENSG00000138050	THUMPD2	THUMP domain containing 2	0.516571	3.93319	24.8965	0.00084148	0.00933868
22796	ENSG00000135775	COG2	component of oligomeric golgi complex 2	0.44933	6.00254	24.8902	0.000842188	0.00934062
51451	ENSG00000205629	LCMT1	leucine carboxyl methyltransferase 1	0.480073	6.69486	24.825	0.000849534	0.00941616
85461	ENSG00000115183	TANC1	tetratricopeptide repeat, ankyrin repeat and coiled-coil containing 1	0.427236	6.12051	24.8024	0.000852098	0.00943863
85315	ENSG00000170915	PAQR8	progestin and adipoQ receptor family member 8	-0.73564	1.97828	24.7974	0.000852669	0.00943899
100132074	ENSG00000204060	FOXO6	forkhead box O6	-0.774179	2.61373	24.7886	0.000853666	0.00944408
100132074	ENSG00000281518	FOXO6	forkhead box O6	-0.774179	2.61373	24.7886	0.000853666	0.00944408
4212	ENSG00000134138	MEIS2	Meis homeobox 2	-0.568615	3.55407	24.781	0.000854531	0.00944771
2195	ENSG00000083857	FAT1	FAT atypical cadherin 1	0.648429	6.54989	24.7423	0.000859024	0.00947426
55824	ENSG00000076641	PAG1	phosphoprotein membrane anchor with glycosphingolipid microdomains 1	1.42963	0.354073	24.7535	0.000857683	0.00947426
79084	ENSG00000116455	WDR77	WD repeat domain 77	0.461676	5.73716	24.7422	0.00085897	0.00947426
80851	ENSG00000175137	SH3BP5L	SH3 binding domain protein 5 like	-0.398327	5.92574	24.7412	0.00085909	0.00947426
100132815	NA	IPO5P1	importin 5 pseudogene 1	-0.858949	3.59822	24.7296	0.000860426	0.00947709
4628	ENSG00000133026	MYH10	myosin heavy chain 10	-0.380771	6.8686	24.7296	0.000860425	0.00947709
7405	ENSG00000198382	UVRAG	UV radiation resistance associated	-0.366042	5.81987	24.7208	0.000861439	0.00948231
284069	ENSG00000161682	FAM171A2	family with sequence similarity 171 member A2	-0.446384	4.34397	24.6993	0.000863914	0.00950359
1027	ENSG00000111276	CDKN1B	cyclin dependent kinase inhibitor 1B	-0.415933	6.66233	24.6658	0.000867798	0.00954035
124590	ENSG00000182040	USH1G	USH1 protein network component sans	-1.6743	0.16779	24.6534	0.000869248	0.00954656
93611	ENSG00000132879	FBXO44	F-box protein 44	-0.765024	3.28346	24.6517	0.00086945	0.00954656
1876	ENSG00000169016	E2F6	E2F transcription factor 6	0.671088	5.90003	24.6669	0.000871409	0.0095621
51043	ENSG00000160685	ZBTB7B	zinc finger and BTB domain containing 7B	-0.420184	6.19546	24.5952	0.000876063	0.00960716
196383	ENSG00000150977	RILPL2	Rab interacting lysosomal protein like 2	-0.6964	3.56673	24.5854	0.000877221	0.00961386
257396	ENSG00000247796	MOCS2-DT	MOCS2 divergent transcript	0.638377	2.64089	24.5755	0.000878381	0.00962058
148479	ENSG00000116273	PHF13	PHD finger protein 13	-0.500985	5.20849	24.5527	0.000881083	0.00964415
5194	ENSG00000162928	PEX13	peroxisomal biogenesis factor 13	-0.414866	6.18548	24.5327	0.000883448	0.00966402
63939	ENSG00000196227	FAM217B	family with sequence similarity 217 member B	0.55142	5.69557	24.5202	0.000884943	0.00967435
32	ENSG00000076555	ACACB	acetyl-CoA carboxylase beta	0.479235	4.96325	24.4985	0.000887535	0.00969665
79991	ENSG00000107960	STN1	STN1 subunit of CST complex	0.431648	5.1132	24.4884	0.000888735	0.00970372
9805	ENSG00000136193	SCRN1	secernin 1	-0.391783	8.03549	24.4208	0.000896882	0.0097866
4209	ENSG00000116604	MEF2D	myocyte enhancer factor 2D	-0.472764	5.72711	24.3804	0.00090179	0.00983405
4209	ENSG00000291761	MEF2D	myocyte enhancer factor 2D	-0.472764	5.72711	24.3804	0.00090179	0.00983405
8706	ENSG00000169255	B3GALNT1	beta-1,3-N-acetylgalactosaminyltransferase 1 (globoside blood group)	0.477416	6.92672	24.3729	0.000902709	0.00983796
5906	ENSG00000116473	RAP1A	RAP1A, member of RAS oncogene family	0.61182	6.56022	24.3628	0.000903942	0.00984529
572	ENSG00000002330	BAD	BCL2 associated agonist of cell death	-0.468389	4.06402	24.3118	0.000910208	0.0099074
8470	ENSG00000154556	SORBS2	sorbin and SH3 domain containing 2	3.13804	-2.39232	24.3022	0.000911392	0.00991414
5873	ENSG00000069974	RAB27A	RAB27A, member RAS oncogene family	-0.468683	3.90708	24.2904	0.000912844	0.00992379
54477	ENSG00000052126	PLEKHA5	pleckstrin homology domain containing A5	-0.745441	4.19002	24.2823	0.000913851	0.00992859
3693	ENSG00000082781	ITGB5	integrin subunit beta 5	0.392483	7.13667	24.2577	0.000916912	0.00995505
90678	ENSG00000148356	LRSAM1	leucine rich repeat and sterile alpha motif containing 1	-0.504618	6.01854	24.2536	0.000917419	0.00995505
130367	ENSG00000163082	SGPP2	sphingosine-1-phosphate phosphatase 2	-0.681998	3.08098	24.2373	0.000919448	0.00996603
51523	ENSG00000171604	CXXC5	CXXC finger protein 5	0.39988	7.98414	24.2364	0.000919566	0.00996603
1316	ENSG00000067082	KLF6	KLF transcription factor 6	0.340557	6.77589	24.2069	0.000923253	0.00999982
23612	ENSG00000174307	PHLDA3	pleckstrin homology like domain family A member 3	-0.475572	6.542	24.1948	0.00092478	0.010004
78994	ENSG00000156858	PRR14	proline rich 14	-0.391879	6.38381	24.1965	0.000924569	0.010004
6601	ENSG00000139613	SMARCC2	SWI/SNF related, matrix associated, actin dependent regulator of chromatin subfamily c member 2	-0.464609	7.39033	24.1582	0.000929394	0.0100477
51067	ENSG00000139131	YARS2	tyrosyl-tRNA synthetase 2	0.441446	4.40442	24.1509	0.000930322	0.0100516
115825	ENSG00000139668	WDFY2	WD repeat and FYVE domain containing 2	-0.506434	4.45782	24.0804	0.0009393	0.0101424
201895	ENSG00000163683	SMIM14	small integral membrane protein 14	-0.422137	8.3696	24.0565	0.000942373	0.0101657
79188	ENSG00000170876	TMEM43	transmembrane protein 43	0.452482	7.22767	24.0546	0.000942621	0.0101657
10636	ENSG00000169220	RGS14	regulator of G protein signaling 14	-0.896736	1.26708	24.0407	0.000944416	0.0101788
440498	ENSG00000226742	HSBP1L1	heat shock factor binding protein 1 like 1	-0.815049	2.49394	23.9278	0.000959129	0.0103311
114785	ENSG00000166987	MBD6	methyl-CpG binding domain protein 6	-0.454772	6.19578	23.9168	0.000960571	0.0103339
55349	ENSG00000016391	CHDH	choline dehydrogenase	0.401492	5.05501	23.919	0.000960285	0.0103339
101927703	NA	FOXCUT	FOXC1 upstream transcript	2.02373	-0.865274	23.9045	0.000962198	0.0103388
64762	ENSG00000141441	GAREM1	GRB2 associated regulator of MAPK1 subtype 1	-0.45975	4.27268	23.9064	0.000961952	0.0103388
5754	ENSG00000112655	PTK7	protein tyrosine kinase 7 (inactive)	-0.717045	4.88422	23.8818	0.000965259	0.0103653
127253	ENSG00000162623	TYW3	tRNA-yW synthesizing protein 3 homolog	0.551934	4.22256	23.8511	0.000969283	0.0104022
23135	ENSG00000132510	KDM6B	lysine demethylase 6B	-0.48001	6.42301	23.8406	0.000970689	0.0104094
51569	ENSG00000120686	UFM1	ubiquitin fold modifier 1	0.455537	6.72646	23.8372	0.000971142	0.0104094
112869	ENSG00000176476	SGF29	SAGA complex associated factor 29	0.414123	4.82564	23.8182	0.000973683	0.0104176
57479	ENSG00000126464	PRR12	proline rich 12	-0.385389	5.9985	23.8189	0.000973587	0.0104176
8861	ENSG00000198728	LDB1	LIM domain binding 1	-0.491836	6.38215	23.8265	0.000972561	0.0104176
115572	ENSG00000158246	TENT5B	terminal nucleotidyltransferase 5B	-0.831027	2.83238	23.8125	0.000974448	0.0104194
10927	ENSG00000106723	SPIN1	spindlin 1	0.421175	7.84776	23.803	0.000975714	0.0104266
25946	ENSG00000161642	ZNF385A	zinc finger protein 385A	-0.482049	5.50732	23.7648	0.000980873	0.01045
54676	ENSG00000172432	GTPBP2	GTP binding protein 2	-0.790771	6.19984	24.8458	0.000980678	0.01045
55160	ENSG00000074964	ARHGEF10L	Rho guanine nucleotide exchange factor 10 like	0.484484	5.37275	23.7752	0.000979461	0.01045
81493	ENSG00000162520	SYNC	syncoilin, intermediate filament protein	-1.75089	-1.0298	23.78	0.00097882	0.01045
9702	ENSG00000166037	CEP57	centrosomal protein 57	-0.517373	4.66072	23.7728	0.000979785	0.01045
150223	ENSG00000161179	YDJC	YdjC chitooligosaccharide deacetylase homolog	0.626261	5.71478	23.7591	0.000981646	0.0104519
93010	ENSG00000156966	B3GNT7	UDP-GlcNAc:betaGal beta-1,3-N-acetylglucosaminyltransferase 7	-1.66435	0.312044	23.6939	0.000990523	0.01054
5777	ENSG00000111679	PTPN6	protein tyrosine phosphatase non-receptor type 6	-0.420705	4.98827	23.6735	0.000993318	0.0105633
10208	ENSG00000132952	USPL1	ubiquitin specific peptidase like 1	0.477397	5.19043	23.6504	0.000996498	0.0105863
7040	ENSG00000105329	TGFB1	transforming growth factor beta 1	-0.595781	6.36066	23.649	0.000996688	0.0105863
388115	ENSG00000188549	CCDC9B	coiled-coil domain containing 9B	-1.32865	1.6905	23.6128	0.00100169	0.0106266
5727	ENSG00000185920	PTCH1	patched 1	-0.993539	2.1966	23.6145	0.00100146	0.0106266
3761	ENSG00000168135	KCNJ4	potassium inwardly rectifying channel subfamily J member 4	-1.6243	0.163794	23.5786	0.00100646	0.0106707
26996	ENSG00000173890	GPR160	G protein-coupled receptor 160	-0.475271	6.08154	23.5653	0.00100832	0.0106712
401303	NA	ZNF815P	zinc finger protein 815, pseudogene	-1.01705	2.16311	23.5678	0.00100797	0.0106712
9766	ENSG00000100647	SUSD6	sushi domain containing 6	-0.368802	5.79844	23.5658	0.00100824	0.0106712
85365	ENSG00000119523	ALG2	ALG2 alpha-1,3/1,6-mannosyltransferase	0.426676	5.96812	23.5572	0.00100944	0.0106766
639	ENSG00000057657	PRDM1	PR/SET domain 1	2.24653	-0.520649	23.5517	0.00101023	0.0106785
147841	ENSG00000161888	SPC24	SPC24 component of NDC80 kinetochore complex	-0.430629	4.07746	23.5386	0.00101205	0.0106792
80772	ENSG00000224051	CPTP	ceramide-1-phosphate transfer protein	-0.433726	4.21975	23.5382	0.00101212	0.0106792
8322	ENSG00000174804	FZD4	frizzled class receptor 4	-0.503198	6.73903	23.5404	0.0010118	0.0106792
27092	ENSG00000075461	CACNG4	calcium voltage-gated channel auxiliary subunit gamma 4	0.49487	8.78717	23.5318	0.00101301	0.0106822
55337	ENSG00000130813	SHFL	shiftless antiviral inhibitor of ribosomal frameshifting	-0.602756	5.19647	23.5073	0.00101646	0.0107122
5909	ENSG00000076864	RAP1GAP	RAP1 GTPase activating protein	-0.555985	4.94647	23.4673	0.00102215	0.0107656
4215	ENSG00000198909	MAP3K3	mitogen-activated protein kinase kinase kinase 3	-0.389019	5.97115	23.4527	0.00102422	0.010781
4682	ENSG00000103274	NUBP1	NUBP iron-sulfur cluster assembly factor 1, cytosolic	0.476171	3.96282	23.4473	0.00102499	0.0107827
9654	ENSG00000135912	TTLL4	tubulin tyrosine ligase like 4	0.510153	4.9767	23.4392	0.00102615	0.0107884
27097	ENSG00000135801	TAF5L	TATA-box binding protein associated factor 5 like	0.438512	5.62253	23.4335	0.00102697	0.0107905
81789	ENSG00000164296	TIGD6	tigger transposable element derived 6	0.58961	3.01808	23.4124	0.00102999	0.0108094
9238	ENSG00000136270	TBRG4	transforming growth factor beta regulator 4	0.413407	6.33351	23.4163	0.00102944	0.0108094
83479	ENSG00000118197	DDX59	DEAD-box helicase 59	0.643004	4.79552	23.3992	0.00103189	0.0108228
79791	ENSG00000103264	FBXO31	F-box protein 31	0.410542	5.92303	23.3683	0.00103636	0.0108632
5129	ENSG00000117266	CDK18	cyclin dependent kinase 18	-0.677256	5.07512	23.3426	0.00104007	0.0108842
6272	ENSG00000134243	SORT1	sortilin 1	-0.379456	7.30021	23.3497	0.00103904	0.0108842
79777	ENSG00000181513	ACBD4	acyl-CoA binding domain containing 4	-0.715045	2.93075	23.3417	0.00104022	0.0108842
85865	ENSG00000105793	GTPBP10	GTP binding protein 10	0.538462	5.01833	23.2983	0.00104655	0.0109439
83593	ENSG00000266094	RASSF5	Ras association domain family member 5	-0.789241	1.64423	23.2789	0.00104939	0.0109671
8204	ENSG00000180530	NRIP1	nuclear receptor interacting protein 1	1.06048	7.11439	27.0514	0.0010518	0.0109858
10153	ENSG00000115816	CEBPZ	CCAAT enhancer binding protein zeta	0.796273	6.47801	24.368	0.0010538	0.0110001
5141	ENSG00000065989	PDE4A	phosphodiesterase 4A	-0.91297	2.03394	23.1719	0.00106527	0.0111031
57555	ENSG00000169992	NLGN2	neuroligin 2	-0.744884	6.0916	23.8701	0.00106556	0.0111031
57555	ENSG00000283859	NLGN2	neuroligin 2	-0.744884	6.0916	23.8701	0.00106556	0.0111031
83549	ENSG00000130717	UCK1	uridine-cytidine kinase 1	-0.445948	5.54251	23.1747	0.00106484	0.0111031
5566	ENSG00000072062	PRKACA	protein kinase cAMP-activated catalytic subunit alpha	-0.346709	6.92765	23.1635	0.00106652	0.0111065
5566	ENSG00000288516	PRKACA	protein kinase cAMP-activated catalytic subunit alpha	-0.346709	6.92765	23.1635	0.00106652	0.0111065
63979	ENSG00000132436	FIGNL1	fidgetin like 1	0.447672	5.04501	23.151	0.0010684	0.0111195
55070	ENSG00000140543	DET1	DET1 partner of COP1 E3 ubiquitin ligase	0.528998	3.28378	23.135	0.0010708	0.0111379
79649	ENSG00000129680	MAP7D3	MAP7 domain containing 3	0.534872	4.75616	23.1294	0.00107166	0.0111402
84826	ENSG00000173349	SFT2D3	SFT2 domain containing 3	0.477604	4.77895	23.0938	0.00107704	0.0111895
219743	ENSG00000156521	TYSND1	trypsin like peroxisomal matrix peptidase 1	0.386453	5.73327	23.0805	0.00107906	0.0112038
10940	ENSG00000104356	POP1	POP1 homolog, ribonuclease P/MRP subunit	0.417741	4.82526	23.0415	0.00108502	0.0112461
9019	ENSG00000197965	MPZL1	myelin protein zero like 1	-0.344292	5.88932	23.0491	0.00108386	0.0112461
90507	ENSG00000141295	SCRN2	secernin 2	-0.609587	4.09326	23.0413	0.00108505	0.0112461
7132	ENSG00000067182	TNFRSF1A	TNF receptor superfamily member 1A	-0.387272	6.0802	23.0275	0.00108716	0.0112613
55039	ENSG00000183665	TRMT12	tRNA methyltransferase 12 homolog	0.443541	6.26871	23.0051	0.0010906	0.0112802
56829	ENSG00000105939	ZC3HAV1	zinc finger CCCH-type containing, antiviral 1	-0.360958	7.47092	23.0016	0.00109114	0.0112802
6809	ENSG00000166900	STX3	syntaxin 3	0.407469	6.20882	23.0009	0.00109126	0.0112802
9867	ENSG00000198961	PJA2	praja ring finger ubiquitin ligase 2	-0.489288	6.71817	22.999	0.00109155	0.0112802
100287902	ENSG00000223776	LGALS8-AS1	LGALS8 antisense RNA 1	-1.50772	0.876304	22.9688	0.00109622	0.0113218
26468	ENSG00000106852	LHX6	LIM homeobox 6	0.873051	1.49725	22.9334	0.00110172	0.0113719
54663	ENSG00000133316	WDR74	WD repeat domain 74	0.491673	6.18804	22.8944	0.00110785	0.0114284
9980	ENSG00000142197	DOP1B	DOP1 leucine zipper like protein B	0.37616	7.44227	22.8884	0.00110879	0.0114314
152831	ENSG00000134962	KLB	klotho beta	1.21204	1.60309	22.8656	0.00111238	0.0114578
202052	ENSG00000170464	DNAJC18	DnaJ heat shock protein family (Hsp40) member C18	-0.904082	2.21764	22.8639	0.00111264	0.0114578
93587	ENSG00000145331	TRMT10A	tRNA methyltransferase 10A	0.500734	3.90279	22.8545	0.00111413	0.0114663
90313	ENSG00000167543	TP53I13	tumor protein p53 inducible protein 13	-0.440956	4.8291	22.8336	0.00111744	0.0114937
1435	ENSG00000184371	CSF1	colony stimulating factor 1	-0.928125	2.17738	22.8156	0.00112031	0.0115097
5045	ENSG00000140564	FURIN	furin, paired basic amino acid cleaving enzyme	-0.628691	6.50921	22.8449	0.00112015	0.0115097
254531	ENSG00000176454	LPCAT4	lysophosphatidylcholine acyltransferase 4	-0.654082	4.40039	22.8011	0.00112263	0.0115155
254531	ENSG00000291994	LPCAT4	lysophosphatidylcholine acyltransferase 4	-0.654082	4.40039	22.8011	0.00112263	0.0115155
2651	ENSG00000111846	GCNT2	glucosaminyl (N-acetyl) transferase 2 (I blood group)	-0.991397	3.16527	22.8281	0.00112284	0.0115155
2651	ENSG00000285222	GCNT2	glucosaminyl (N-acetyl) transferase 2 (I blood group)	-0.991397	3.16527	22.8281	0.00112284	0.0115155
53944	ENSG00000169118	CSNK1G1	casein kinase 1 gamma 1	-0.361848	6.20305	22.8061	0.00112182	0.0115155
22934	ENSG00000153574	RPIA	ribose 5-phosphate isomerase A	0.580647	5.12905	22.7865	0.00112495	0.0115237
84260	ENSG00000139437	TCHP	trichoplein keratin filament binding	0.408921	4.35424	22.7872	0.00112484	0.0115237
54980	ENSG00000115998	C2orf42	chromosome 2 open reading frame 42	0.507413	4.05435	22.7611	0.00112903	0.0115587
100130093	NA	NA	NA	-0.702514	1.91549	22.7337	0.00113346	0.0115973
2769	ENSG00000060558	GNA15	G protein subunit alpha 15	-1.0333	0.748798	22.7292	0.00113417	0.0115979
10501	ENSG00000167680	SEMA6B	semaphorin 6B	-0.784991	4.88852	23.1899	0.00113621	0.011612
6097	ENSG00000143365	RORC	RAR related orphan receptor C	-0.831123	3.22921	22.7064	0.00113787	0.0116222
9961	ENSG00000013364	MVP	major vault protein	-0.353123	6.41188	22.6979	0.00113926	0.0116296
27304	ENSG00000124217	MOCS3	molybdenum cofactor synthesis 3	0.426135	5.4912	22.6829	0.0011417	0.0116477
3159	ENSG00000137309	HMGA1	high mobility group AT-hook 1	-0.428836	7.09699	22.6668	0.00114433	0.0116678
8496	ENSG00000110841	PPFIBP1	PPFIA binding protein 1	0.524938	4.72534	22.6476	0.00114748	0.0116931
55813	ENSG00000108651	UTP6	UTP6 small subunit processome component	0.364283	5.14686	22.6401	0.00114871	0.0116989
51118	ENSG00000183520	UTP11	UTP11 small subunit processome component	0.443765	4.83219	22.6162	0.00115265	0.0117321
4601	ENSG00000119950	MXI1	MAX interactor 1, dimerization protein	0.461472	4.16158	22.5677	0.00116068	0.0118071
26153	ENSG00000066735	KIF26A	kinesin family member 26A	-0.515771	4.94318	22.5635	0.00116138	0.0118074
84206	ENSG00000183496	MEX3B	mex-3 RNA binding family member B	-0.428349	4.25206	22.5497	0.00116368	0.0118239
200186	ENSG00000160741	CRTC2	CREB regulated transcription coactivator 2	-0.395044	5.85251	22.4982	0.00117231	0.0118979
9679	ENSG00000189319	FAM53B	family with sequence similarity 53 member B	-0.398174	5.98528	22.5016	0.00117175	0.0118979
5481	ENSG00000171497	PPID	peptidylprolyl isomerase D	0.408377	5.33824	22.4398	0.00118221	0.0119914
79990	ENSG00000068137	PLEKHH3	pleckstrin homology, MyTH4 and FERM domain containing H3	-0.38776	5.49422	22.43	0.00118387	0.0120013
161742	ENSG00000166068	SPRED1	sprouty related EVH1 domain containing 1	0.578863	3.21027	22.415	0.00118645	0.0120136
2317	ENSG00000136068	FLNB	filamin B	0.37366	8.7881	22.4164	0.00118621	0.0120136
3659	ENSG00000125347	IRF1	interferon regulatory factor 1	-0.392192	5.23219	22.371	0.001194	0.0120761
5745	ENSG00000160801	PTH1R	parathyroid hormone 1 receptor	1.65558	-0.419155	22.3714	0.00119393	0.0120761
55609	ENSG00000056277	ZNF280C	zinc finger protein 280C	0.797902	3.42225	22.3653	0.00119499	0.0120791
28964	ENSG00000108262	GIT1	GIT ArfGAP 1	-0.384292	5.95133	22.3529	0.00119713	0.0120856
4091	ENSG00000137834	SMAD6	SMAD family member 6	-0.56237	3.13139	22.3571	0.0011964	0.0120856
51719	ENSG00000135932	CAB39	calcium binding protein 39	-0.372654	7.12035	22.3462	0.00119828	0.0120856
9414	ENSG00000119139	TJP2	tight junction protein 2	-0.337776	6.33114	22.3456	0.00119838	0.0120856
221184	ENSG00000140848	CPNE2	copine 2	-0.514692	3.65109	22.3399	0.00119937	0.0120887
116362	ENSG00000162444	RBP7	retinol binding protein 7	1.75939	-0.115397	22.3297	0.00120114	0.0120977
7289	ENSG00000078246	TULP3	TUB like protein 3	-0.444431	4.56886	22.3268	0.00120164	0.0120977
79147	ENSG00000181027	FKRP	fukutin related protein	0.534095	3.41877	22.314	0.00120387	0.0121132
51704	ENSG00000167191	GPRC5B	G protein-coupled receptor class C group 5 member B	-0.99497	2.41613	22.2954	0.00120712	0.0121389
90102	ENSG00000144824	PHLDB2	pleckstrin homology like domain family B member 2	0.50399	5.96326	22.2798	0.00120985	0.0121594
222166	ENSG00000180354	MTURN	maturin, neural progenitor differentiation regulator homolog	-0.548672	3.69528	22.2741	0.00121085	0.0121625
1831	ENSG00000157514	TSC22D3	TSC22 domain family member 3	-0.461855	6.0024	22.2601	0.0012133	0.0121732
83544	ENSG00000119661	DNAL1	dynein axonemal light chain 1	-0.480924	3.95221	22.2636	0.00121269	0.0121732
57464	ENSG00000128578	STRIP2	striatin interacting protein 2	1.55967	-0.42214	22.2548	0.00121423	0.0121756
57291	ENSG00000226950	DANCR	differentiation antagonizing non-protein coding RNA	0.631966	3.40687	22.2398	0.00121687	0.012191
80315	ENSG00000113742	CPEB4	cytoplasmic polyadenylation element binding protein 4	0.595004	5.20761	22.2382	0.00121715	0.012191
10908	ENSG00000032444	PNPLA6	patatin like phospholipase domain containing 6	-0.518309	5.17323	22.2319	0.00121828	0.0121953
489	ENSG00000074370	ATP2A3	ATPase sarcoplasmic/endoplasmic reticulum Ca2+ transporting 3	-0.507433	8.19824	22.2091	0.0012223	0.0122286
84186	ENSG00000147905	ZCCHC7	zinc finger CCHC-type containing 7	0.473344	3.9333	22.1724	0.00122884	0.012287
81562	ENSG00000114988	LMAN2L	lectin, mannose binding 2 like	-0.457753	4.62025	22.1328	0.00123594	0.012351
100506428	ENSG00000236830	CBR3-AS1	CBR3 antisense RNA 1	0.586674	3.6087	22.1181	0.00123859	0.0123704
11011	ENSG00000146872	TLK2	tousled like kinase 2	-0.734145	7.46009	22.9341	0.00124358	0.0124132
152926	ENSG00000163644	PPM1K	protein phosphatase, Mg2+/Mn2+ dependent 1K	0.633841	6.42305	22.1079	0.0012453	0.0124162
467	ENSG00000162772	ATF3	activating transcription factor 3	0.645085	3.2804	22.0836	0.00124483	0.0124162
64777	ENSG00000145916	RMND5B	required for meiotic nuclear division 5 homolog B	-0.517816	7.05341	22.0759	0.00124623	0.0124185
93622	ENSG00000170846	MRFAP1L2	Morf4 family associated protein 1 like 2	0.429998	5.64292	22.071	0.0012471	0.0124201
57526	ENSG00000165194	PCDH19	protocadherin 19	1.86471	0.22032	22.0645	0.0012483	0.012425
9663	ENSG00000101577	LPIN2	lipin 2	-0.336766	5.49094	22.0577	0.00124953	0.0124303
80207	ENSG00000125741	OPA3	outer mitochondrial membrane lipid metabolism regulator OPA3	0.367759	5.29756	22.0371	0.0012533	0.0124606
148252	ENSG00000176490	DIRAS1	DIRAS family GTPase 1	-0.891351	3.0516	22.0022	0.0012597	0.012496
221895	ENSG00000153814	JAZF1	JAZF zinc finger 1	-0.889029	1.62027	22.0096	0.00125835	0.012496
3655	ENSG00000091409	ITGA6	integrin subunit alpha 6	0.980325	1.85215	22.0082	0.00125861	0.012496
51236	ENSG00000235173	HGH1	HGH1 homolog	0.417619	5.42258	22.0037	0.00125943	0.012496
51373	ENSG00000239789	MRPS17	mitochondrial ribosomal protein S17	0.509623	4.22804	21.9841	0.00126304	0.0125175
5932	ENSG00000101773	RBBP8	RB binding protein 8, endonuclease	0.837635	5.72043	23.4224	0.00126329	0.0125175
57575	ENSG00000138650	PCDH10	protocadherin 10	-0.784188	5.11442	22.6154	0.00126512	0.0125285
441459	ENSG00000230453	ANKRD18B	ankyrin repeat domain 18B	0.743666	3.71981	21.9436	0.00127055	0.0125746
54790	ENSG00000168769	TET2	tet methylcytosine dioxygenase 2	0.534561	6.11538	21.9401	0.0012712	0.0125746
5782	ENSG00000127947	PTPN12	protein tyrosine phosphatase non-receptor type 12	-0.443277	6.94952	21.9182	0.00127528	0.0126078
10529	ENSG00000078114	NEBL	nebulette	-0.386129	7.42245	21.8977	0.00127912	0.0126387
57834	ENSG00000171903	CYP4F11	cytochrome P450 family 4 subfamily F member 11	0.492431	3.79487	21.8587	0.00128647	0.0127042
26520	ENSG00000100575	TIMM9	translocase of inner mitochondrial membrane 9	0.490735	5.56476	21.8474	0.00128861	0.0127181
79840	ENSG00000187736	NHEJ1	non-homologous end joining factor 1	0.583664	2.98294	21.8411	0.0012898	0.0127227
134285	ENSG00000157111	TMEM171	transmembrane protein 171	1.4361	-0.378309	21.8172	0.00129434	0.0127604
55777	ENSG00000204406	MBD5	methyl-CpG binding domain protein 5	-0.464619	4.84568	21.8111	0.00129551	0.0127647
1874	ENSG00000205250	E2F4	E2F transcription factor 4	0.353475	6.29889	21.7971	0.00129817	0.0127766
2491	ENSG00000102384	CENPI	centromere protein I	-0.507212	3.72217	21.8009	0.00129745	0.0127766
2125	ENSG00000167880	EVPL	envoplakin	-0.410716	5.89524	21.7788	0.00130168	0.012804
84446	ENSG00000160469	BRSK1	BR serine/threonine kinase 1	-1.06041	2.73469	21.7854	0.00130545	0.0128339
91526	ENSG00000065413	ANKRD44	ankyrin repeat domain 44	-0.749371	2.437	21.7404	0.00130907	0.0128622
140838	ENSG00000170191	NANP	N-acetylneuraminic acid phosphatase	0.416441	4.85461	21.7219	0.00131265	0.012883
8864	ENSG00000132326	PER2	period circadian regulator 2	0.548182	5.31831	21.723	0.00131242	0.012883
158	ENSG00000239900	ADSL	adenylosuccinate lyase	0.512862	5.45128	21.7152	0.00131395	0.0128886
51054	ENSG00000134297	PLEKHA8P1	pleckstrin homology domain containing A8 pseudogene 1	1.01174	2.54465	21.7058	0.00131577	0.0128934
7675	ENSG00000197961	ZNF121	zinc finger protein 121	0.811355	3.32308	21.7051	0.0013159	0.0128934
390205	ENSG00000204950	LRRC10B	leucine rich repeat containing 10B	-0.932869	2.72972	21.674	0.00132196	0.0129454
3460	ENSG00000159128	IFNGR2	interferon gamma receptor 2	-0.792677	1.84951	21.6583	0.00132504	0.0129673
3460	ENSG00000262795	IFNGR2	interferon gamma receptor 2	-0.792677	1.84951	21.6583	0.00132504	0.0129673
7225	ENSG00000137672	TRPC6	transient receptor potential cation channel subfamily C member 6	2.55448	-1.00319	21.6551	0.00132566	0.0129673
10598	ENSG00000100591	AHSA1	activator of HSP90 ATPase activity 1	0.437234	7.58429	21.643	0.00132804	0.0129833
7043	ENSG00000119699	TGFB3	transforming growth factor beta 3	-0.578976	4.70107	21.6367	0.00132928	0.0129883
26146	ENSG00000204104	TRAF3IP1	TRAF3 interacting protein 1	-0.390978	4.33169	21.6314	0.00133032	0.0129912
115290	ENSG00000269190	FBXO17	F-box protein 17	-0.441318	4.17167	21.6183	0.00133291	0.0130092
115290	ENSG00000282954	FBXO17	F-box protein 17	-0.441318	4.17167	21.6183	0.00133291	0.0130092
29919	ENSG00000141452	RMC1	regulator of MON1-CCZ1	0.389541	4.87889	21.6017	0.00133619	0.013034
57510	ENSG00000124571	XPO5	exportin 5	0.339764	7.51048	21.5899	0.00133853	0.0130496
6732	ENSG00000096063	SRPK1	SRSF protein kinase 1	0.330764	6.79397	21.5785	0.00134079	0.0130643
2188	ENSG00000183161	FANCF	FA complementation group F	0.461669	5.2729	21.5671	0.00134306	0.0130792
114112	ENSG00000197763	TXNRD3	thioredoxin reductase 3	0.61998	4.1897	21.556	0.00134528	0.0130935
9718	ENSG00000145194	ECE2	endothelin converting enzyme 2	0.573644	4.77989	21.5357	0.00134933	0.0131257
6621	ENSG00000165684	SNAPC4	small nuclear RNA activating complex polypeptide 4	0.654307	5.41542	21.5418	0.00135329	0.0131569
84289	ENSG00000168395	ING5	inhibitor of growth family member 5	0.529807	5.43128	21.5111	0.00135427	0.0131592
65094	ENSG00000081692	JMJD4	jumonji domain containing 4	0.524705	4.05442	21.5003	0.00135645	0.0131731
252884	ENSG00000186496	ZNF396	zinc finger protein 396	-0.81522	1.74059	21.484	0.00135975	0.0131978
79570	ENSG00000084628	NKAIN1	sodium/potassium transporting ATPase interacting 1	1.3093	0.885652	21.4401	0.00136867	0.0132771
29094	ENSG00000119862	LGALSL	galectin like	-0.43462	3.71819	21.4296	0.00137081	0.0132905
100507290	ENSG00000261221	ZNF865	zinc finger protein 865	-0.540202	4.19804	21.4001	0.00137684	0.0133399
51466	ENSG00000196405	EVL	Enah/Vasp-like	-0.375511	6.81627	21.3943	0.00137805	0.0133399
5590	ENSG00000067606	PRKCZ	protein kinase C zeta	-0.476533	4.72114	21.3936	0.00137818	0.0133399
51645	ENSG00000137168	PPIL1	peptidylprolyl isomerase like 1	0.481201	6.02118	21.3779	0.00138142	0.0133639
2072	ENSG00000175595	ERCC4	ERCC excision repair 4, endonuclease catalytic subunit	0.371171	4.96716	21.3706	0.00138292	0.013371
388567	ENSG00000186230	ZNF749	zinc finger protein 749	0.653567	3.39907	21.3553	0.00138609	0.0133943
8675	ENSG00000124222	STX16	syntaxin 16	-0.393981	8.03773	21.3373	0.00138982	0.0134229
55316	ENSG00000136444	RSAD1	radical S-adenosyl methionine domain containing 1	0.424067	5.393	21.3216	0.00139309	0.0134398
79156	ENSG00000166289	PLEKHF1	pleckstrin homology and FYVE domain containing 1	-0.76032	1.99348	21.3218	0.00139306	0.0134398
55170	ENSG00000198890	PRMT6	protein arginine methyltransferase 6	0.427942	8.42586	21.3014	0.00139731	0.0134731
123	ENSG00000147872	PLIN2	perilipin 2	-1.37956	3.64648	24.1895	0.00139928	0.0134847
25817	ENSG00000219438	TAFA5	TAFA chemokine like family member 5	-0.655525	2.14174	21.2821	0.00140137	0.01349
80339	ENSG00000100344	PNPLA3	patatin like phospholipase domain containing 3	1.63783	-0.884953	21.2823	0.00140131	0.01349
144811	ENSG00000179630	LACC1	laccase domain containing 1	0.815629	4.75302	21.9696	0.00140383	0.0134986
23368	ENSG00000088808	PPP1R13B	protein phosphatase 1 regulatory subunit 13B	-0.399029	6.33207	21.2701	0.00140388	0.0134986
388695	ENSG00000163155	LYSMD1	LysM domain containing 1	-0.752099	3.14771	21.2632	0.00140533	0.0134986
96764	ENSG00000137574	TGS1	trimethylguanosine synthase 1	0.425989	5.0246	21.2645	0.00140507	0.0134986
10499	ENSG00000140396	NCOA2	nuclear receptor coactivator 2	-0.620589	6.37632	21.2792	0.00140729	0.01351
85015	ENSG00000123552	USP45	ubiquitin specific peptidase 45	0.543828	3.79746	21.2312	0.00141209	0.0135487
80146	ENSG00000115652	UXS1	UDP-glucuronate decarboxylase 1	0.375049	5.87785	21.2159	0.00141534	0.0135724
23092	ENSG00000145819	ARHGAP26	Rho GTPase activating protein 26	1.44245	-0.132985	21.2039	0.00141789	0.0135895
63926	ENSG00000132623	ANKEF1	ankyrin repeat and EF-hand domain containing 1	0.433871	5.21898	21.1989	0.00141896	0.0135923
51422	ENSG00000106617	PRKAG2	protein kinase AMP-activated non-catalytic subunit gamma 2	0.401605	4.57979	21.1859	0.00142175	0.0136116
101929147	ENSG00000231365	WARS2-AS1	WARS2 antisense RNA 1	0.728272	2.60503	21.1788	0.00142327	0.0136187
10982	ENSG00000166974	MAPRE2	microtubule associated protein RP/EB family member 2	0.869717	1.37537	21.1629	0.00142666	0.0136438
7733	ENSG00000167384	ZNF180	zinc finger protein 180	0.500041	3.82848	21.1418	0.00143121	0.0136798
2131	ENSG00000182197	EXT1	exostosin glycosyltransferase 1	0.407621	4.50452	21.1304	0.00143366	0.0136958
147929	ENSG00000196357	ZNF565	zinc finger protein 565	0.660385	2.15204	21.1169	0.00143659	0.0137163
100507437	ENSG00000251602	MTA1-DT	MTA1 divergent transcript	-1.16128	0.815578	21.1095	0.00143819	0.0137177
63941	ENSG00000125967	NECAB3	N-terminal EF-hand calcium binding protein 3	-0.527403	4.81961	21.109	0.0014383	0.0137177
27242	ENSG00000146072	TNFRSF21	TNF receptor superfamily member 21	0.665001	5.47771	21.1545	0.00144254	0.0137507
11219	ENSG00000183479	TREX2	three prime repair exonuclease 2	1.24265	0.504389	21.0605	0.00144885	0.0137959
23097	ENSG00000155111	CDK19	cyclin dependent kinase 19	-0.518745	5.69408	21.0637	0.00144817	0.0137959
200879	ENSG00000163898	LIPH	lipase H	-0.706933	3.01712	21.0434	0.0014526	0.0138145
2323	ENSG00000090554	FLT3LG	fms related receptor tyrosine kinase 3 ligand	-0.848391	1.17822	21.0373	0.00145395	0.0138145
55437	ENSG00000082146	STRADB	STE20 related adaptor beta	-0.652635	4.28641	21.0395	0.00145346	0.0138145
9495	ENSG00000179841	AKAP5	A-kinase anchoring protein 5	-0.822938	3.48495	21.0438	0.00145253	0.0138145
596	ENSG00000171791	BCL2	BCL2 apoptosis regulator	1.08846	4.9386	23.7689	0.00145732	0.013839
149428	ENSG00000163141	BNIPL	BCL2 interacting protein like	-0.495649	3.71538	21.016	0.00145864	0.0138441
1827	ENSG00000159200	RCAN1	regulator of calcineurin 1	0.538831	4.52222	21.0093	0.00146012	0.0138506
4756	ENSG00000067141	NEO1	neogenin 1	-0.477102	6.49554	21.0052	0.00146102	0.0138513
9990	ENSG00000140199	SLC12A6	solute carrier family 12 member 6	-0.653127	3.15248	21.0018	0.00146177	0.0138513
151963	ENSG00000180611	MB21D2	Mab-21 domain containing 2	0.534788	5.6735	20.9937	0.00146357	0.013861
57128	ENSG00000214113	LYRM4	LYR motif containing 4	0.523339	3.7918	20.9845	0.00146562	0.0138728
1723	ENSG00000102967	DHODH	dihydroorotate dehydrogenase (quinone)	0.650408	4.60044	20.9664	0.00146962	0.0138883
2671	ENSG00000127554	GFER	growth factor, augmenter of liver regeneration	-0.374603	5.29486	20.9688	0.00146909	0.0138883
2671	ENSG00000291944	GFER	growth factor, augmenter of liver regeneration	-0.374603	5.29486	20.9688	0.00146909	0.0138883
55794	ENSG00000182810	DDX28	DEAD-box helicase 28	0.512641	4.44084	20.9698	0.00146888	0.0138883
5596	ENSG00000141639	MAPK4	mitogen-activated protein kinase 4	1.1996	-0.0814431	20.9575	0.00147161	0.0138921
5596	ENSG00000282110	MAPK4	mitogen-activated protein kinase 4	1.1996	-0.0814431	20.9575	0.00147161	0.0138921
9128	ENSG00000136875	PRPF4	pre-mRNA processing factor 4	0.420129	6.66421	20.959	0.00147128	0.0138921
9015	ENSG00000143498	TAF1A	TATA-box binding protein associated factor, RNA polymerase I subunit A	0.51254	3.38636	20.9403	0.00147545	0.0139209
200933	ENSG00000174013	FBXO45	F-box protein 45	0.459548	6.28584	20.9327	0.00147715	0.0139294
55783	ENSG00000180917	CMTR2	cap methyltransferase 2	0.374032	6.41361	20.9268	0.00147849	0.0139346
55272	ENSG00000177971	IMP3	IMP U3 small nucleolar ribonucleoprotein 3	0.551556	6.81988	20.9227	0.00147941	0.0139358
79414	ENSG00000126243	LRFN3	leucine rich repeat and fibronectin type III domain containing 3	-0.540016	3.72965	20.8704	0.0014912	0.0140394
55640	ENSG00000119686	FLVCR2	FLVCR choline and putative heme transporter 2	0.593333	5.25372	20.8611	0.00149331	0.0140516
7706	ENSG00000121060	TRIM25	tripartite motif containing 25	-0.526005	7.91187	20.8576	0.0014941	0.0140516
219833	ENSG00000174370	KCNJ5-AS1	KCNJ5 antisense RNA 1	-0.962964	0.972032	20.8046	0.00150621	0.0141579
220	ENSG00000184254	ALDH1A3	aldehyde dehydrogenase 1 family member A3	0.743936	2.65054	20.799	0.00150749	0.0141624
166929	ENSG00000164023	SGMS2	sphingomyelin synthase 2	0.763237	2.9589	20.7878	0.00151007	0.014179
23318	ENSG00000134744	TUT4	terminal uridylyl transferase 4	-0.615947	2.7212	20.7709	0.00151396	0.0142004
8828	ENSG00000118257	NRP2	neuropilin 2	2.45064	-1.74088	20.7729	0.00151352	0.0142004
1201	ENSG00000188603	CLN3	CLN3 lysosomal/endosomal transmembrane protein, battenin	-0.349446	7.28377	20.7664	0.00151501	0.0142027
114659	ENSG00000185158	LRRC37B	leucine rich repeat containing 37B	-0.776206	2.14652	20.7522	0.00151829	0.0142258
2005	ENSG00000158711	ELK4	ETS transcription factor ELK4	0.543462	6.65344	20.7385	0.00152148	0.0142374
23293	ENSG00000070366	SMG6	SMG6 nonsense mediated mRNA decay factor	-0.32616	5.76372	20.7381	0.00152157	0.0142374
4615	ENSG00000172936	MYD88	MYD88 innate immune signal transduction adaptor	-0.395378	6.67206	20.7364	0.00152196	0.0142374
9024	ENSG00000174672	BRSK2	BR serine/threonine kinase 2	-0.909778	2.80762	20.7308	0.00152327	0.014242
9024	ENSG00000291428	BRSK2	BR serine/threonine kinase 2	-0.909778	2.80762	20.7308	0.00152327	0.014242
2618	ENSG00000159131	GART	phosphoribosylglycinamide formyltransferase, phosphoribosylglycinamide synthetase, phosphoribosylaminoimidazole synthetase	0.353223	6.65156	20.7181	0.00152623	0.0142545
2618	ENSG00000262473	GART	phosphoribosylglycinamide formyltransferase, phosphoribosylglycinamide synthetase, phosphoribosylaminoimidazole synthetase	0.353223	6.65156	20.7181	0.00152623	0.0142545
56605	ENSG00000086619	ERO1B	endoplasmic reticulum oxidoreductase 1 beta	-0.895816	1.4898	20.7207	0.00152562	0.0142545
89766	ENSG00000177398	UMODL1	uromodulin like 1	1.50032	-0.0235449	20.7082	0.00152853	0.0142685
79762	ENSG00000162817	C1orf115	chromosome 1 open reading frame 115	-0.628444	3.25568	20.6819	0.00153469	0.0143183
6002	ENSG00000159788	RGS12	regulator of G protein signaling 12	-0.392968	4.61035	20.6754	0.00153623	0.0143251
27345	ENSG00000135643	KCNMB4	potassium calcium-activated channel subfamily M regulatory beta subunit 4	-0.506977	3.83122	20.6634	0.00153905	0.0143438
80213	ENSG00000184277	TM2D3	TM2 domain containing 3	0.342626	5.55968	20.6518	0.0015418	0.0143618
3725	ENSG00000177606	JUN	Jun proto-oncogene, AP-1 transcription factor subunit	0.375533	7.006	20.6407	0.00154441	0.0143785
255231	ENSG00000153898	MCOLN2	mucolipin TRP cation channel 2	0.757495	3.14151	20.6305	0.00154682	0.0143874
7082	ENSG00000104067	TJP1	tight junction protein 1	0.775784	2.09018	20.6298	0.00154701	0.0143874
7082	ENSG00000277401	TJP1	tight junction protein 1	0.775784	2.09018	20.6298	0.00154701	0.0143874
9917	ENSG00000116199	FAM20B	FAM20B glycosaminoglycan xylosylkinase	0.349885	6.61716	20.6222	0.00154881	0.0143966
338442	ENSG00000182782	HCAR2	hydroxycarboxylic acid receptor 2	-0.719538	1.75058	20.5955	0.00155517	0.014448
10906	ENSG00000135148	TRAFD1	TRAF-type zinc finger domain containing 1	-0.376499	6.15387	20.5882	0.0015569	0.014449
3588	ENSG00000243646	IL10RB	interleukin 10 receptor subunit beta	-0.433771	4.12317	20.5882	0.00155692	0.014449
22859	ENSG00000072071	ADGRL1	adhesion G protein-coupled receptor L1	-0.557993	6.79812	20.5432	0.00156771	0.0145415
22859	ENSG00000288324	ADGRL1	adhesion G protein-coupled receptor L1	-0.557993	6.79812	20.5432	0.00156771	0.0145415
284349	ENSG00000167637	ZNF283	zinc finger protein 283	0.587154	3.06733	20.5263	0.0015718	0.0145717
7570	ENSG00000165512	ZNF22	zinc finger protein 22	0.523019	3.35554	20.5214	0.00157299	0.014575
375513	NA	GUSBP4	GUSB pseudogene 4	0.530034	2.91324	20.466	0.00158646	0.0146921
84675	ENSG00000147573	TRIM55	tripartite motif containing 55	1.29175	1.65578	20.458	0.00158842	0.0147025
80155	ENSG00000164134	NAA15	N-alpha-acetyltransferase 15, NatA auxiliary subunit	0.509968	6.86349	20.4232	0.00159699	0.014774
137209	ENSG00000180938	ZNF572	zinc finger protein 572	-0.429567	3.86593	20.4049	0.00160151	0.0148081
22994	ENSG00000141577	CEP131	centrosomal protein 131	-0.540466	4.19711	20.3815	0.0016073	0.0148538
10076	ENSG00000060656	PTPRU	protein tyrosine phosphatase receptor type U	-0.532171	6.01549	20.3723	0.00160961	0.0148645
22983	ENSG00000105613	MAST1	microtubule associated serine/threonine kinase 1	-1.37936	2.25655	21.0262	0.001611	0.0148645
2645	ENSG00000106633	GCK	glucokinase	2.21628	-1.12082	20.3673	0.00161085	0.0148645
22841	ENSG00000107560	RAB11FIP2	RAB11 family interacting protein 2	0.739619	4.10414	20.3429	0.00161704	0.0149087
26515	ENSG00000132286	TIMM10B	translocase of inner mitochondrial membrane 10B	0.368254	4.70414	20.338	0.00161818	0.0149087
51005	ENSG00000162066	AMDHD2	amidohydrolase domain containing 2	-0.498153	4.83634	20.3374	0.00161833	0.0149087
163154	ENSG00000212123	PRR22	proline rich 22	1.19318	1.21196	20.314	0.00162421	0.014955
145781	ENSG00000137878	GCOM1	GCOM1, MYZAP-POLR2M combined locus	1.40157	-0.34435	20.3086	0.00162557	0.0149597
3475	ENSG00000006652	IFRD1	interferon related developmental regulator 1	0.341726	5.98366	20.2831	0.00163201	0.0150111
1054	ENSG00000153879	CEBPG	CCAAT enhancer binding protein gamma	0.47607	5.8034	20.2696	0.00163543	0.0150347
101928105	NA	LOC101928105	uncharacterized LOC101928105	1.61134	-0.702412	20.2333	0.00164469	0.0150961
59274	ENSG00000140406	TLNRD1	talin rod domain containing 1	0.311214	6.42513	20.2349	0.00164427	0.0150961
[truncated: 16,680 more rows]
