# Supplementary material for: A novel ARMC5-containing ubiquitin ligase controls the degradation of HSPA1A and its client protein estrogen receptor alpha
Source: Research Square preprint supplement (doi:10.21203/rs.3.rs-8810312/v1), 2026-02-22
Supplement: Supplementary file 7 [file 83a1339519dc7db244844709.xlsx]

## Sheet: ARMC5_only_down_BP
S-Table 6. GO analysis in terms of the biological processes for genes that were downregulated in MCF7 cells overexpressing ARMC5 in the presence versus absence of E2
ID	Description	Gene Ratio	Background Ratio	Rich Factor	Fold Enrichment	Z-Score	p-value	Adjusted p-value	q-value	Gene ID	Count
GO:0006816	calcium ion transport	9/74	445/18986	0.0202247	5.18901	5.59341	5.64793e-05	0.0306696	0.0289787	TMEM37/PLCD1/TMEM38A/GJC2/CACNG8/KCNJ8/CACNB1/TLR9/EFHB	9
GO:0070588	calcium ion transmembrane transport	8/74	348/18986	0.0229885	5.89811	5.7686	6.18241e-05	0.0306696	0.0289787	TMEM37/PLCD1/TMEM38A/GJC2/CACNG8/KCNJ8/CACNB1/TLR9	8
GO:0006936	muscle contraction	8/74	358/18986	0.0223464	5.73335	5.65561	7.53553e-05	0.0306696	0.0289787	CHRNB1/TMEM38A/HTR1D/GDNF/HCN4/KCNJ8/CACNB1/KCNJ12	8
GO:0003012	muscle system process	8/74	465/18986	0.0172043	4.41407	4.6625	0.000446208	0.136205	0.128696	CHRNB1/TMEM38A/HTR1D/GDNF/HCN4/KCNJ8/CACNB1/KCNJ12	8
GO:1990573	potassium ion import across plasma membrane	3/74	46/18986	0.0652174	16.7327	6.68257	0.000764947	0.1868	0.176501	HCN4/KCNJ8/KCNJ12	3
GO:0043462	regulation of ATP-dependent activity	3/74	63/18986	0.047619	12.2175	5.57858	0.00190849	0.31784	0.300317	IFIT1/BRSK2/TLR9	3
GO:0032780	negative regulation of ATP-dependent activity	2/74	18/18986	0.111111	28.5075	7.30347	0.00220215	0.31784	0.300317	IFIT1/TLR9	2
GO:0034765	regulation of monoatomic ion transmembrane transport	6/74	354/18986	0.0169492	4.3486	3.97821	0.00257118	0.31784	0.300317	TMEM38A/GJC2/KCNJ8/CACNB1/KCNJ12/TLR9	6
GO:0043269	regulation of monoatomic ion transport	7/74	480/18986	0.0145833	3.74161	3.80559	0.0026421	0.31784	0.300317	TMEM38A/GJC2/KCNJ8/CACNB1/KCNJ12/TLR9/EFHB	7
GO:0002755	MyD88-dependent toll-like receptor signaling pathway	2/74	20/18986	0.1	25.6568	6.90106	0.00272095	0.31784	0.300317	IRF7/TLR9	2
GO:0034762	regulation of transmembrane transport	7/74	487/18986	0.0143737	3.68783	3.75876	0.00286343	0.31784	0.300317	TMEM38A/GJC2/CACNG8/KCNJ8/CACNB1/KCNJ12/TLR9	7
GO:0051924	regulation of calcium ion transport	5/74	258/18986	0.0193798	4.97224	4.01839	0.00334919	0.34078	0.321992	TMEM38A/GJC2/CACNB1/TLR9/EFHB	5
GO:0014821	phasic smooth muscle contraction	2/74	24/18986	0.0833333	21.3806	6.24933	0.00391293	0.367514	0.347253	HTR1D/GDNF	2
GO:0032727	positive regulation of interferon-alpha production	2/74	25/18986	0.08	20.5254	6.11071	0.0042425	0.370006	0.349607	IRF7/TLR9	2
GO:1903169	regulation of calcium ion transmembrane transport	4/74	179/18986	0.0223464	5.73335	3.98005	0.00526284	0.424079	0.400699	TMEM38A/GJC2/CACNB1/TLR9	4
GO:0032607	interferon-alpha production	2/74	31/18986	0.0645161	16.5527	5.42099	0.00647744	0.424079	0.400699	IRF7/TLR9	2
GO:0032647	regulation of interferon-alpha production	2/74	31/18986	0.0645161	16.5527	5.42099	0.00647744	0.424079	0.400699	IRF7/TLR9	2
GO:0051607	defense response to virus	5/74	320/18986	0.015625	4.00887	3.39551	0.00823011	0.424079	0.400699	IFIT1/IRF7/KCNJ8/TSPAN32/TLR9	5
GO:0003161	cardiac conduction system development	2/74	37/18986	0.0540541	13.8685	4.90104	0.00913874	0.424079	0.400699	HCN4/KCNJ8	2
GO:0008016	regulation of heart contraction	4/74	213/18986	0.0187793	4.81817	3.50534	0.00961172	0.424079	0.400699	TMEM38A/HCN4/KCNJ8/KCNJ12	4
GO:0007616	long-term memory	2/74	39/18986	0.0512821	13.1573	4.75392	0.010117	0.424079	0.400699	RGS14/NTF4	2
GO:0001838	embryonic epithelial tube formation	3/74	115/18986	0.026087	6.69307	3.83045	0.010273	0.424079	0.400699	SEMA4C/SALL4/GDNF	3
GO:0071805	potassium ion transmembrane transport	4/74	219/18986	0.0182648	4.68617	3.43204	0.0105645	0.424079	0.400699	TMEM38A/HCN4/KCNJ8/KCNJ12	4
GO:0006688	glycosphingolipid biosynthetic process	2/74	40/18986	0.05	12.8284	4.68434	0.0106229	0.424079	0.400699	FUT2/B3GNT5	2
GO:0001824	blastocyst development	3/74	118/18986	0.0254237	6.5229	3.76442	0.011014	0.424079	0.400699	TET1/CMTM3/SALL4	3
GO:0032728	positive regulation of interferon-beta production	2/74	41/18986	0.0487805	12.5155	4.61721	0.0111397	0.424079	0.400699	IRF7/TLR9	2
GO:0006486	protein glycosylation	4/74	223/18986	0.0179372	4.60211	3.38462	0.0112324	0.424079	0.400699	TET1/GCNT2/FUT2/B3GNT5	4
GO:0043413	macromolecule glycosylation	4/74	223/18986	0.0179372	4.60211	3.38462	0.0112324	0.424079	0.400699	TET1/GCNT2/FUT2/B3GNT5	4
GO:0001941	postsynaptic membrane organization	2/74	42/18986	0.047619	12.2175	4.55237	0.0116674	0.424079	0.400699	CHRNB1/GDNF	2
GO:0072175	epithelial tube formation	3/74	128/18986	0.0234375	6.0133	3.55986	0.0137034	0.424079	0.400699	SEMA4C/SALL4/GDNF	3
GO:0098659	inorganic cation import across plasma membrane	3/74	128/18986	0.0234375	6.0133	3.55986	0.0137034	0.424079	0.400699	HCN4/KCNJ8/KCNJ12	3
GO:0099587	inorganic ion import across plasma membrane	3/74	128/18986	0.0234375	6.0133	3.55986	0.0137034	0.424079	0.400699	HCN4/KCNJ8/KCNJ12	3
GO:0007613	memory	3/74	129/18986	0.0232558	5.96669	3.54061	0.0139911	0.424079	0.400699	RGS14/PAK6/NTF4	3
GO:0070085	glycosylation	4/74	242/18986	0.0165289	4.24079	3.1738	0.0147766	0.424079	0.400699	TET1/GCNT2/FUT2/B3GNT5	4
GO:0071526	semaphorin-plexin signaling pathway	2/74	48/18986	0.0416667	10.6903	4.20479	0.0150579	0.424079	0.400699	SEMA4C/GDNF	2
GO:0001774	microglial cell activation	2/74	49/18986	0.0408163	10.4721	4.15282	0.0156594	0.424079	0.400699	KCNJ8/TLR9	2
GO:0043330	response to exogenous dsRNA	2/74	49/18986	0.0408163	10.4721	4.15282	0.0156594	0.424079	0.400699	IFIT1/KCNJ8	2
GO:0006813	potassium ion transport	4/74	248/18986	0.016129	4.13819	3.11168	0.0160271	0.424079	0.400699	TMEM38A/HCN4/KCNJ8/KCNJ12	4
GO:0060047	heart contraction	4/74	253/18986	0.0158103	4.0564	3.0614	0.0171186	0.424079	0.400699	TMEM38A/HCN4/KCNJ8/KCNJ12	4
GO:0002269	leukocyte activation involved in inflammatory response	2/74	52/18986	0.0384615	9.86798	4.00551	0.017525	0.424079	0.400699	KCNJ8/TLR9	2
GO:0035148	tube formation	3/74	142/18986	0.0211268	5.42044	3.30732	0.0180447	0.424079	0.400699	SEMA4C/SALL4/GDNF	3
GO:0016331	morphogenesis of embryonic epithelium	3/74	143/18986	0.020979	5.38254	3.29057	0.0183808	0.424079	0.400699	SEMA4C/SALL4/GDNF	3
GO:0007586	digestion	3/74	144/18986	0.0208333	5.34516	3.27398	0.0187204	0.424079	0.400699	CTRB1/CTRB2/TLR9	3
GO:0003015	heart process	4/74	262/18986	0.0152672	3.91706	2.97406	0.0191988	0.424079	0.400699	TMEM38A/HCN4/KCNJ8/KCNJ12	4
GO:0060048	cardiac muscle contraction	3/74	147/18986	0.0204082	5.23607	3.22512	0.01976	0.424079	0.400699	TMEM38A/HCN4/KCNJ8	3
GO:1903522	regulation of blood circulation	4/74	267/18986	0.0149813	3.84371	2.9272	0.0204193	0.424079	0.400699	TMEM38A/HCN4/KCNJ8/KCNJ12	4
GO:0014074	response to purine-containing compound	3/74	150/18986	0.02	5.13135	3.17758	0.0208311	0.424079	0.400699	TMEM38A/HCN4/KCNJ8	3
GO:0001755	neural crest cell migration	2/74	57/18986	0.0350877	9.00237	3.78482	0.020832	0.424079	0.400699	SEMA4C/GDNF	2
GO:0043331	response to dsRNA	2/74	57/18986	0.0350877	9.00237	3.78482	0.020832	0.424079	0.400699	IFIT1/KCNJ8	2
GO:0030534	adult behavior	3/74	151/18986	0.0198675	5.09737	3.16201	0.0211951	0.424079	0.400699	CHRNB1/GDNF/NTF4	3
GO:0010959	regulation of metal ion transport	5/74	408/18986	0.0122549	3.14421	2.73874	0.0214911	0.424079	0.400699	TMEM38A/GJC2/CACNB1/TLR9/EFHB	5
GO:0061900	glial cell activation	2/74	58/18986	0.0344828	8.84716	3.74392	0.0215223	0.424079	0.400699	KCNJ8/TLR9	2
GO:0090497	mesenchymal cell migration	2/74	59/18986	0.0338983	8.69721	3.704	0.0222221	0.424079	0.400699	SEMA4C/GDNF	2
GO:0032608	interferon-beta production	2/74	60/18986	0.0333333	8.55225	3.66501	0.0229312	0.424079	0.400699	IRF7/TLR9	2
GO:0032648	regulation of interferon-beta production	2/74	60/18986	0.0333333	8.55225	3.66501	0.0229312	0.424079	0.400699	IRF7/TLR9	2
GO:0009615	response to virus	5/74	425/18986	0.0117647	3.01844	2.63246	0.0250877	0.424079	0.400699	IFIT1/IRF7/KCNJ8/TSPAN32/TLR9	5
GO:0032091	negative regulation of protein binding	2/74	64/18986	0.03125	8.01774	3.51768	0.0258595	0.424079	0.400699	IFIT1/EFHB	2
GO:2001236	regulation of extrinsic apoptotic signaling pathway	3/74	164/18986	0.0182927	4.69331	2.97137	0.0262454	0.424079	0.400699	TMBIM1/TNFSF10/GDNF	3
GO:0042692	muscle cell differentiation	5/74	432/18986	0.0115741	2.96953	2.59023	0.026675	0.424079	0.400699	SEMA4C/CHRNB1/EHD2/MAMSTR/KCNJ8	5
GO:0032613	interleukin-10 production	2/74	66/18986	0.030303	7.77477	3.44873	0.0273777	0.424079	0.400699	TRIB2/TLR9	2
GO:0032653	regulation of interleukin-10 production	2/74	66/18986	0.030303	7.77477	3.44873	0.0273777	0.424079	0.400699	TRIB2/TLR9	2
GO:0070372	regulation of ERK1 and ERK2 cascade	4/74	296/18986	0.0135135	3.46713	2.676	0.0284374	0.424079	0.400699	GCNT2/RGS14/THPO/TLR9	4
GO:0043524	negative regulation of neuron apoptotic process	3/74	170/18986	0.0176471	4.52766	2.89002	0.0287754	0.424079	0.400699	TMBIM1/GDNF/NTF4	3
GO:0006687	glycosphingolipid metabolic process	2/74	70/18986	0.0285714	7.3305	3.31914	0.030519	0.424079	0.400699	FUT2/B3GNT5	2
GO:0048645	animal organ formation	2/74	70/18986	0.0285714	7.3305	3.31914	0.030519	0.424079	0.400699	GDNF/NTF4	2
GO:0006937	regulation of muscle contraction	3/74	174/18986	0.0172414	4.42358	2.83785	0.0305317	0.424079	0.400699	TMEM38A/HCN4/CACNB1	3
GO:0002753	cytoplasmic pattern recognition receptor signaling pathway	3/74	178/18986	0.0168539	4.32417	2.78724	0.0323435	0.424079	0.400699	IRF7/KCNJ8/TLR9	3
GO:0009064	glutamine family amino acid metabolic process	2/74	74/18986	0.027027	6.93426	3.19938	0.0337961	0.424079	0.400699	RIMKLA/NAGS	2
GO:0009247	glycolipid biosynthetic process	2/74	75/18986	0.0266667	6.8418	3.17083	0.0346361	0.424079	0.400699	FUT2/B3GNT5	2
GO:0032481	positive regulation of type I interferon production	2/74	75/18986	0.0266667	6.8418	3.17083	0.0346361	0.424079	0.400699	IRF7/TLR9	2
GO:1904062	regulation of monoatomic cation transmembrane transport	4/74	318/18986	0.0125786	3.22727	2.50547	0.0356152	0.424079	0.400699	TMEM38A/GJC2/CACNB1/TLR9	4
GO:0070371	ERK1 and ERK2 cascade	4/74	319/18986	0.0125392	3.21715	2.49807	0.0359642	0.424079	0.400699	GCNT2/RGS14/THPO/TLR9	4
GO:0009101	glycoprotein biosynthetic process	4/74	322/18986	0.0124224	3.18717	2.47606	0.0370234	0.424079	0.400699	TET1/GCNT2/FUT2/B3GNT5	4
GO:0019226	transmission of nerve impulse	2/74	78/18986	0.025641	6.57866	3.08821	0.0372042	0.424079	0.400699	CACNG8/KCNJ8	2
GO:0055117	regulation of cardiac muscle contraction	2/74	79/18986	0.0253165	6.49538	3.06163	0.0380762	0.424079	0.400699	TMEM38A/HCN4	2
GO:0070373	negative regulation of ERK1 and ERK2 cascade	2/74	79/18986	0.0253165	6.49538	3.06163	0.0380762	0.424079	0.400699	RGS14/TLR9	2
GO:0051095	regulation of helicase activity	1/74	10/18986	0.1	25.6568	4.8785	0.0383085	0.424079	0.400699	IFIT1	1
GO:0061762	CAMKK-AMPK signaling cascade	1/74	10/18986	0.1	25.6568	4.8785	0.0383085	0.424079	0.400699	KCNJ8	1
GO:0072172	mesonephric tubule formation	1/74	10/18986	0.1	25.6568	4.8785	0.0383085	0.424079	0.400699	GDNF	1
GO:0099566	regulation of postsynaptic cytosolic calcium ion concentration	1/74	10/18986	0.1	25.6568	4.8785	0.0383085	0.424079	0.400699	GRID2IP	1
GO:0140507	granzyme-mediated programmed cell death signaling pathway	1/74	10/18986	0.1	25.6568	4.8785	0.0383085	0.424079	0.400699	GSDMB	1
GO:0014032	neural crest cell development	2/74	80/18986	0.025	6.41419	3.03551	0.0389559	0.424079	0.400699	SEMA4C/GDNF	2
GO:0006941	striated muscle contraction	3/74	194/18986	0.0154639	3.96754	2.59874	0.0401412	0.424079	0.400699	TMEM38A/HCN4/KCNJ8	3
GO:0001843	neural tube closure	2/74	82/18986	0.0243902	6.25775	2.98457	0.0407385	0.424079	0.400699	SEMA4C/SALL4	2
GO:0002224	toll-like receptor signaling pathway	2/74	82/18986	0.0243902	6.25775	2.98457	0.0407385	0.424079	0.400699	IRF7/TLR9	2
GO:0043086	negative regulation of catalytic activity	5/74	486/18986	0.0102881	2.63958	2.29044	0.0410916	0.424079	0.400699	IFIT1/TMBIM1/RGS14/TRIB2/PAPLN	5
GO:0060606	tube closure	2/74	83/18986	0.0240964	6.18235	2.95974	0.0416413	0.424079	0.400699	SEMA4C/SALL4	2
GO:0003337	mesenchymal to epithelial transition involved in metanephros morphogenesis	1/74	11/18986	0.0909091	23.3243	4.63272	0.0420587	0.424079	0.400699	GDNF	1
GO:0015747	urate transport	1/74	11/18986	0.0909091	23.3243	4.63272	0.0420587	0.424079	0.400699	SLC23A1	1
GO:0039530	MDA-5 signaling pathway	1/74	11/18986	0.0909091	23.3243	4.63272	0.0420587	0.424079	0.400699	IRF7	1
GO:0045654	positive regulation of megakaryocyte differentiation	1/74	11/18986	0.0909091	23.3243	4.63272	0.0420587	0.424079	0.400699	THPO	1
GO:0060920	cardiac pacemaker cell differentiation	1/74	11/18986	0.0909091	23.3243	4.63272	0.0420587	0.424079	0.400699	KCNJ8	1
GO:0071313	cellular response to caffeine	1/74	11/18986	0.0909091	23.3243	4.63272	0.0420587	0.424079	0.400699	TMEM38A	1
GO:0086070	SA node cell to atrial cardiac muscle cell communication	1/74	11/18986	0.0909091	23.3243	4.63272	0.0420587	0.424079	0.400699	HCN4	1
GO:2000109	regulation of macrophage apoptotic process	1/74	11/18986	0.0909091	23.3243	4.63272	0.0420587	0.424079	0.400699	IRF7	1
GO:0008344	adult locomotory behavior	2/74	84/18986	0.0238095	6.10875	2.9353	0.0425516	0.424079	0.400699	GDNF/NTF4	2
GO:0086001	cardiac muscle cell action potential	2/74	85/18986	0.0235294	6.03688	2.91126	0.0434693	0.424079	0.400699	HCN4/KCNJ8	2
GO:0086003	cardiac muscle cell contraction	2/74	85/18986	0.0235294	6.03688	2.91126	0.0434693	0.424079	0.400699	HCN4/KCNJ8	2
GO:0048864	stem cell development	2/74	86/18986	0.0232558	5.96669	2.8876	0.0443944	0.424079	0.400699	SEMA4C/GDNF	2
GO:0071357	cellular response to type I interferon	2/74	86/18986	0.0232558	5.96669	2.8876	0.0443944	0.424079	0.400699	IFIT1/IRF7	2
GO:0150076	neuroinflammatory response	2/74	86/18986	0.0232558	5.96669	2.8876	0.0443944	0.424079	0.400699	KCNJ8/TLR9	2
GO:0008625	extrinsic apoptotic signaling pathway via death domain receptors	2/74	87/18986	0.0229885	5.89811	2.86431	0.0453269	0.424079	0.400699	TMBIM1/TNFSF10	2
GO:0014020	primary neural tube formation	2/74	87/18986	0.0229885	5.89811	2.86431	0.0453269	0.424079	0.400699	SEMA4C/SALL4	2
GO:0000050	urea cycle	1/74	12/18986	0.0833333	21.3806	4.41755	0.0457946	0.424079	0.400699	NAGS	1
GO:0003163	sinoatrial node development	1/74	12/18986	0.0833333	21.3806	4.41755	0.0457946	0.424079	0.400699	HCN4	1
GO:0014831	gastro-intestinal system smooth muscle contraction	1/74	12/18986	0.0833333	21.3806	4.41755	0.0457946	0.424079	0.400699	HTR1D	1
GO:0030432	peristalsis	1/74	12/18986	0.0833333	21.3806	4.41755	0.0457946	0.424079	0.400699	GDNF	1
GO:0033605	positive regulation of catecholamine secretion	1/74	12/18986	0.0833333	21.3806	4.41755	0.0457946	0.424079	0.400699	GDNF	1
GO:0034163	regulation of toll-like receptor 9 signaling pathway	1/74	12/18986	0.0833333	21.3806	4.41755	0.0457946	0.424079	0.400699	TLR9	1
GO:0048484	enteric nervous system development	1/74	12/18986	0.0833333	21.3806	4.41755	0.0457946	0.424079	0.400699	GDNF	1
GO:0051583	dopamine uptake involved in synaptic transmission	1/74	12/18986	0.0833333	21.3806	4.41755	0.0457946	0.424079	0.400699	GDNF	1
GO:0051934	catecholamine uptake involved in synaptic transmission	1/74	12/18986	0.0833333	21.3806	4.41755	0.0457946	0.424079	0.400699	GDNF	1
GO:0060312	regulation of blood vessel remodeling	1/74	12/18986	0.0833333	21.3806	4.41755	0.0457946	0.424079	0.400699	TMBIM1	1
GO:0098953	receptor diffusion trapping	1/74	12/18986	0.0833333	21.3806	4.41755	0.0457946	0.424079	0.400699	CACNG8	1
GO:0098970	postsynaptic neurotransmitter receptor diffusion trapping	1/74	12/18986	0.0833333	21.3806	4.41755	0.0457946	0.424079	0.400699	CACNG8	1
GO:0099628	neurotransmitter receptor diffusion trapping	1/74	12/18986	0.0833333	21.3806	4.41755	0.0457946	0.424079	0.400699	CACNG8	1
GO:0098739	import across plasma membrane	3/74	206/18986	0.0145631	3.73642	2.47014	0.0465591	0.424079	0.400699	HCN4/KCNJ8/KCNJ12	3
GO:0006596	polyamine biosynthetic process	1/74	13/18986	0.0769231	19.736	4.227	0.049516	0.424079	0.400699	PAOX	1
GO:0015851	nucleobase transport	1/74	13/18986	0.0769231	19.736	4.227	0.049516	0.424079	0.400699	SLC23A1	1
GO:0032490	detection of molecule of bacterial origin	1/74	13/18986	0.0769231	19.736	4.227	0.049516	0.424079	0.400699	TLR9	1
GO:0036462	TRAIL-activated apoptotic signaling pathway	1/74	13/18986	0.0769231	19.736	4.227	0.049516	0.424079	0.400699	TNFSF10	1
GO:0044029	positive regulation of gene expression via chromosomal CpG island demethylation	1/74	13/18986	0.0769231	19.736	4.227	0.049516	0.424079	0.400699	TET1	1
GO:0051124	synaptic assembly at neuromuscular junction	1/74	13/18986	0.0769231	19.736	4.227	0.049516	0.424079	0.400699	KCNJ8	1
GO:0071415	cellular response to purine-containing compound	1/74	13/18986	0.0769231	19.736	4.227	0.049516	0.424079	0.400699	TMEM38A	1
GO:0071679	commissural neuron axon guidance	1/74	13/18986	0.0769231	19.736	4.227	0.049516	0.424079	0.400699	GDNF	1
GO:0034340	response to type I interferon	2/74	92/18986	0.0217391	5.57756	2.75307	0.0500965	0.424079	0.400699	IFIT1/IRF7	2
GO:0007626	locomotory behavior	3/74	213/18986	0.0140845	3.61363	2.39949	0.0505238	0.424079	0.400699	PAK6/GDNF/NTF4	3
GO:0014033	neural crest cell differentiation	2/74	93/18986	0.0215054	5.51758	2.7318	0.0510714	0.424079	0.400699	SEMA4C/GDNF	2
GO:0001841	neural tube formation	2/74	94/18986	0.0212766	5.45888	2.71084	0.0520532	0.424079	0.400699	SEMA4C/SALL4	2
GO:0019627	urea metabolic process	1/74	14/18986	0.0714286	18.3263	4.05662	0.0532232	0.424079	0.400699	NAGS	1
GO:0019852	L-ascorbic acid metabolic process	1/74	14/18986	0.0714286	18.3263	4.05662	0.0532232	0.424079	0.400699	SLC23A1	1
GO:0031115	negative regulation of microtubule polymerization	1/74	14/18986	0.0714286	18.3263	4.05662	0.0532232	0.424079	0.400699	INPP5J	1
GO:0032725	positive regulation of granulocyte macrophage colony-stimulating factor production	1/74	14/18986	0.0714286	18.3263	4.05662	0.0532232	0.424079	0.400699	TLR9	1
GO:0034116	positive regulation of heterotypic cell-cell adhesion	1/74	14/18986	0.0714286	18.3263	4.05662	0.0532232	0.424079	0.400699	GCNT2	1
GO:0038180	nerve growth factor signaling pathway	1/74	14/18986	0.0714286	18.3263	4.05662	0.0532232	0.424079	0.400699	NTF4	1
GO:0071888	macrophage apoptotic process	1/74	14/18986	0.0714286	18.3263	4.05662	0.0532232	0.424079	0.400699	IRF7	1
GO:0072283	metanephric renal vesicle morphogenesis	1/74	14/18986	0.0714286	18.3263	4.05662	0.0532232	0.424079	0.400699	GDNF	1
GO:1904152	regulation of retrograde protein transport, ER to cytosol	1/74	14/18986	0.0714286	18.3263	4.05662	0.0532232	0.424079	0.400699	BRSK2	1
GO:0051899	membrane depolarization	2/74	97/18986	0.0206186	5.29005	2.6497	0.0550388	0.424079	0.400699	CHRNB1/HCN4	2
GO:0043123	positive regulation of canonical NF-kappaB signal transduction	3/74	223/18986	0.0134529	3.45158	2.30356	0.0564642	0.424079	0.400699	TNFSF10/GPRC5B/TLR9	3
GO:0001833	inner cell mass cell proliferation	1/74	15/18986	0.0666667	17.1045	3.90302	0.0569161	0.424079	0.400699	SALL4	1
GO:0009084	glutamine family amino acid biosynthetic process	1/74	15/18986	0.0666667	17.1045	3.90302	0.0569161	0.424079	0.400699	NAGS	1
GO:0031000	response to caffeine	1/74	15/18986	0.0666667	17.1045	3.90302	0.0569161	0.424079	0.400699	TMEM38A	1
GO:0032621	interleukin-18 production	1/74	15/18986	0.0666667	17.1045	3.90302	0.0569161	0.424079	0.400699	TLR9	1
GO:0032661	regulation of interleukin-18 production	1/74	15/18986	0.0666667	17.1045	3.90302	0.0569161	0.424079	0.400699	TLR9	1
GO:0035860	glial cell-derived neurotrophic factor receptor signaling pathway	1/74	15/18986	0.0666667	17.1045	3.90302	0.0569161	0.424079	0.400699	GDNF	1
GO:0044725	epigenetic programming in the zygotic pronuclei	1/74	15/18986	0.0666667	17.1045	3.90302	0.0569161	0.424079	0.400699	TET1	1
GO:1901741	positive regulation of myoblast fusion	1/74	15/18986	0.0666667	17.1045	3.90302	0.0569161	0.424079	0.400699	EHD2	1
GO:0001657	ureteric bud development	2/74	100/18986	0.02	5.13135	2.59104	0.0580837	0.424079	0.400699	GDNF/SIM1	2
GO:0006493	protein O-linked glycosylation	2/74	100/18986	0.02	5.13135	2.59104	0.0580837	0.424079	0.400699	TET1/B3GNT5	2
GO:0006942	regulation of striated muscle contraction	2/74	101/18986	0.019802	5.08055	2.57201	0.0591115	0.424079	0.400699	TMEM38A/HCN4	2
GO:0051100	negative regulation of binding	2/74	101/18986	0.019802	5.08055	2.57201	0.0591115	0.424079	0.400699	IFIT1/EFHB	2
GO:0072163	mesonephric epithelium development	2/74	101/18986	0.019802	5.08055	2.57201	0.0591115	0.424079	0.400699	GDNF/SIM1	2
GO:0072164	mesonephric tubule development	2/74	101/18986	0.019802	5.08055	2.57201	0.0591115	0.424079	0.400699	GDNF/SIM1	2
GO:2001237	negative regulation of extrinsic apoptotic signaling pathway	2/74	102/18986	0.0196078	5.03074	2.55323	0.0601456	0.424079	0.400699	TMBIM1/GDNF	2
GO:0002371	dendritic cell cytokine production	1/74	16/18986	0.0625	16.0355	3.76353	0.0605948	0.424079	0.400699	TLR9	1
GO:0002730	regulation of dendritic cell cytokine production	1/74	16/18986	0.0625	16.0355	3.76353	0.0605948	0.424079	0.400699	TLR9	1
GO:0002756	MyD88-independent toll-like receptor signaling pathway	1/74	16/18986	0.0625	16.0355	3.76353	0.0605948	0.424079	0.400699	IRF7	1
GO:0006004	fucose metabolic process	1/74	16/18986	0.0625	16.0355	3.76353	0.0605948	0.424079	0.400699	FUT2	1
GO:0071941	nitrogen cycle metabolic process	1/74	16/18986	0.0625	16.0355	3.76353	0.0605948	0.424079	0.400699	NAGS	1
GO:2000696	regulation of epithelial cell differentiation involved in kidney development	1/74	16/18986	0.0625	16.0355	3.76353	0.0605948	0.424079	0.400699	GDNF	1
GO:2001256	regulation of store-operated calcium entry	1/74	16/18986	0.0625	16.0355	3.76353	0.0605948	0.424079	0.400699	EFHB	1
GO:0001823	mesonephros development	2/74	105/18986	0.0190476	4.887	2.49833	0.0632852	0.424079	0.400699	GDNF/SIM1	2
GO:0002027	regulation of heart rate	2/74	105/18986	0.0190476	4.887	2.49833	0.0632852	0.424079	0.400699	HCN4/KCNJ8	2
GO:0019722	calcium-mediated signaling	3/74	235/18986	0.012766	3.27533	2.19543	0.0640121	0.424079	0.400699	TMEM38A/KCNJ8/EFHB	3
GO:0010831	positive regulation of myotube differentiation	1/74	17/18986	0.0588235	15.0922	3.63608	0.0642593	0.424079	0.400699	MAMSTR	1
GO:0021535	cell migration in hindbrain	1/74	17/18986	0.0588235	15.0922	3.63608	0.0642593	0.424079	0.400699	SEMA4C	1
GO:0032604	granulocyte macrophage colony-stimulating factor production	1/74	17/18986	0.0588235	15.0922	3.63608	0.0642593	0.424079	0.400699	TLR9	1
GO:0032645	regulation of granulocyte macrophage colony-stimulating factor production	1/74	17/18986	0.0588235	15.0922	3.63608	0.0642593	0.424079	0.400699	TLR9	1
GO:0036065	fucosylation	1/74	17/18986	0.0588235	15.0922	3.63608	0.0642593	0.424079	0.400699	FUT2	1
GO:0071360	cellular response to exogenous dsRNA	1/74	17/18986	0.0588235	15.0922	3.63608	0.0642593	0.424079	0.400699	IFIT1	1
GO:0072077	renal vesicle morphogenesis	1/74	17/18986	0.0588235	15.0922	3.63608	0.0642593	0.424079	0.400699	GDNF	1
GO:0097091	synaptic vesicle clustering	1/74	17/18986	0.0588235	15.0922	3.63608	0.0642593	0.424079	0.400699	BRSK2	1
GO:1901334	lactone metabolic process	1/74	17/18986	0.0588235	15.0922	3.63608	0.0642593	0.424079	0.400699	SLC23A1	1
GO:1902033	regulation of hematopoietic stem cell proliferation	1/74	17/18986	0.0588235	15.0922	3.63608	0.0642593	0.424079	0.400699	THPO	1
GO:2000311	regulation of AMPA receptor activity	1/74	17/18986	0.0588235	15.0922	3.63608	0.0642593	0.424079	0.400699	CACNG8	1
GO:0097191	extrinsic apoptotic signaling pathway	3/74	236/18986	0.0127119	3.26145	2.18673	0.0646613	0.424079	0.400699	TMBIM1/TNFSF10/GDNF	3
GO:0050829	defense response to Gram-negative bacterium	2/74	107/18986	0.0186916	4.79566	2.46287	0.0654088	0.424079	0.400699	GSDMB/TLR9	2
GO:0009100	glycoprotein metabolic process	4/74	392/18986	0.0102041	2.61804	2.02487	0.0668285	0.424079	0.400699	TET1/GCNT2/FUT2/B3GNT5	4
GO:0006939	smooth muscle contraction	2/74	109/18986	0.0183486	4.70766	2.42828	0.0675561	0.424079	0.400699	HTR1D/GDNF	2
GO:0006595	polyamine metabolic process	1/74	18/18986	0.0555556	14.2538	3.51898	0.0679097	0.424079	0.400699	PAOX	1
GO:0060576	intestinal epithelial cell development	1/74	18/18986	0.0555556	14.2538	3.51898	0.0679097	0.424079	0.400699	TLR9	1
GO:0072087	renal vesicle development	1/74	18/18986	0.0555556	14.2538	3.51898	0.0679097	0.424079	0.400699	GDNF	1
GO:0090190	positive regulation of branching involved in ureteric bud morphogenesis	1/74	18/18986	0.0555556	14.2538	3.51898	0.0679097	0.424079	0.400699	GDNF	1
GO:0090494	dopamine uptake	1/74	18/18986	0.0555556	14.2538	3.51898	0.0679097	0.424079	0.400699	GDNF	1
GO:0098915	membrane repolarization during ventricular cardiac muscle cell action potential	1/74	18/18986	0.0555556	14.2538	3.51898	0.0679097	0.424079	0.400699	KCNJ8	1
GO:0006664	glycolipid metabolic process	2/74	110/18986	0.0181818	4.66486	2.4113	0.0686386	0.424079	0.400699	FUT2/B3GNT5	2
GO:0003279	cardiac septum development	2/74	111/18986	0.018018	4.62284	2.39453	0.0697268	0.424079	0.400699	SALL4/KCNJ8	2
GO:0035249	synaptic transmission, glutamatergic	2/74	111/18986	0.018018	4.62284	2.39453	0.0697268	0.424079	0.400699	CACNG8/KCNJ8	2
GO:1903509	liposaccharide metabolic process	2/74	111/18986	0.018018	4.62284	2.39453	0.0697268	0.424079	0.400699	FUT2/B3GNT5	2
GO:0042116	macrophage activation	2/74	112/18986	0.0178571	4.58156	2.37795	0.0708207	0.424079	0.400699	KCNJ8/TLR9	2
GO:0099173	postsynapse organization	3/74	246/18986	0.0121951	3.12887	2.10225	0.0713207	0.424079	0.400699	SEMA4C/CHRNB1/GDNF	3
GO:0008356	asymmetric cell division	1/74	19/18986	0.0526316	13.5036	3.41086	0.0715461	0.424079	0.400699	RGS14	1
GO:0042402	cellular biogenic amine catabolic process	1/74	19/18986	0.0526316	13.5036	3.41086	0.0715461	0.424079	0.400699	PAOX	1
GO:0048486	parasympathetic nervous system development	1/74	19/18986	0.0526316	13.5036	3.41086	0.0715461	0.424079	0.400699	GDNF	1
GO:0060231	mesenchymal to epithelial transition	1/74	19/18986	0.0526316	13.5036	3.41086	0.0715461	0.424079	0.400699	GDNF	1
GO:0061098	positive regulation of protein tyrosine kinase activity	1/74	19/18986	0.0526316	13.5036	3.41086	0.0715461	0.424079	0.400699	GPRC5B	1
GO:0090493	catecholamine uptake	1/74	19/18986	0.0526316	13.5036	3.41086	0.0715461	0.424079	0.400699	GDNF	1
GO:0097320	plasma membrane tubulation	1/74	19/18986	0.0526316	13.5036	3.41086	0.0715461	0.424079	0.400699	EHD2	1
GO:1902514	regulation of calcium ion transmembrane transport via high voltage-gated calcium channel	1/74	19/18986	0.0526316	13.5036	3.41086	0.0715461	0.424079	0.400699	CACNB1	1
GO:0002274	myeloid leukocyte activation	3/74	247/18986	0.0121457	3.11621	2.09404	0.0720031	0.424079	0.400699	KCNJ8/TSPAN32/TLR9	3
GO:0030148	sphingolipid biosynthetic process	2/74	114/18986	0.0175439	4.50119	2.34537	0.0730254	0.424079	0.400699	FUT2/B3GNT5	2
GO:1901800	positive regulation of proteasomal protein catabolic process	2/74	114/18986	0.0175439	4.50119	2.34537	0.0730254	0.424079	0.400699	TRIB2/ECSCR	2
GO:0070252	actin-mediated cell contraction	2/74	115/18986	0.0173913	4.46204	2.32936	0.074136	0.424079	0.400699	HCN4/KCNJ8	2
GO:0006525	arginine metabolic process	1/74	20/18986	0.05	12.8284	3.31059	0.0751685	0.424079	0.400699	NAGS	1
GO:0021516	dorsal spinal cord development	1/74	20/18986	0.05	12.8284	3.31059	0.0751685	0.424079	0.400699	GDNF	1
GO:0033033	negative regulation of myeloid cell apoptotic process	1/74	20/18986	0.05	12.8284	3.31059	0.0751685	0.424079	0.400699	IRF7	1
GO:0034162	toll-like receptor 9 signaling pathway	1/74	20/18986	0.05	12.8284	3.31059	0.0751685	0.424079	0.400699	TLR9	1
GO:0045655	regulation of monocyte differentiation	1/74	20/18986	0.05	12.8284	3.31059	0.0751685	0.424079	0.400699	IRF7	1
GO:0048266	behavioral response to pain	1/74	20/18986	0.05	12.8284	3.31059	0.0751685	0.424079	0.400699	LPAR5	1
GO:0051580	regulation of neurotransmitter uptake	1/74	20/18986	0.05	12.8284	3.31059	0.0751685	0.424079	0.400699	GDNF	1
GO:0060340	positive regulation of type I interferon-mediated signaling pathway	1/74	20/18986	0.05	12.8284	3.31059	0.0751685	0.424079	0.400699	IRF7	1
GO:0072079	nephron tubule formation	1/74	20/18986	0.05	12.8284	3.31059	0.0751685	0.424079	0.400699	GDNF	1
GO:1901739	regulation of myoblast fusion	1/74	20/18986	0.05	12.8284	3.31059	0.0751685	0.424079	0.400699	EHD2	1
GO:0043393	regulation of protein binding	2/74	116/18986	0.0172414	4.42358	2.31353	0.0752522	0.424079	0.400699	IFIT1/EFHB	2
GO:0099072	regulation of postsynaptic membrane neurotransmitter receptor levels	2/74	117/18986	0.017094	4.38577	2.29789	0.0763737	0.424079	0.400699	GRID2IP/CACNG8	2
GO:0043523	regulation of neuron apoptotic process	3/74	254/18986	0.011811	3.03033	2.03771	0.0768628	0.424079	0.400699	TMBIM1/GDNF/NTF4	3
GO:0090257	regulation of muscle system process	3/74	254/18986	0.011811	3.03033	2.03771	0.0768628	0.424079	0.400699	TMEM38A/HCN4/CACNB1	3
GO:0009310	amine catabolic process	1/74	21/18986	0.047619	12.2175	3.21723	0.0787769	0.424079	0.400699	PAOX	1
GO:0035461	vitamin transmembrane transport	1/74	21/18986	0.047619	12.2175	3.21723	0.0787769	0.424079	0.400699	SLC23A1	1
GO:0043586	tongue development	1/74	21/18986	0.047619	12.2175	3.21723	0.0787769	0.424079	0.400699	NTF4	1
GO:0061577	calcium ion transmembrane transport via high voltage-gated calcium channel	1/74	21/18986	0.047619	12.2175	3.21723	0.0787769	0.424079	0.400699	CACNB1	1
GO:0090189	regulation of branching involved in ureteric bud morphogenesis	1/74	21/18986	0.047619	12.2175	3.21723	0.0787769	0.424079	0.400699	GDNF	1
GO:0090200	positive regulation of release of cytochrome c from mitochondria	1/74	21/18986	0.047619	12.2175	3.21723	0.0787769	0.424079	0.400699	TNFSF10	1
GO:2001135	regulation of endocytic recycling	1/74	21/18986	0.047619	12.2175	3.21723	0.0787769	0.424079	0.400699	EHD2	1
GO:0015908	fatty acid transport	2/74	120/18986	0.0166667	4.27613	2.25198	0.0797702	0.424079	0.400699	KCNJ8/RBP5	2
GO:0001759	organ induction	1/74	22/18986	0.0454545	11.6622	3.13	0.0823714	0.424079	0.400699	GDNF	1
GO:0003228	atrial cardiac muscle tissue development	1/74	22/18986	0.0454545	11.6622	3.13	0.0823714	0.424079	0.400699	HCN4	1
GO:0032874	positive regulation of stress-activated MAPK cascade	1/74	22/18986	0.0454545	11.6622	3.13	0.0823714	0.424079	0.400699	SEMA4C	1
GO:0048485	sympathetic nervous system development	1/74	22/18986	0.0454545	11.6622	3.13	0.0823714	0.424079	0.400699	GDNF	1
GO:0070304	positive regulation of stress-activated protein kinase signaling cascade	1/74	22/18986	0.0454545	11.6622	3.13	0.0823714	0.424079	0.400699	SEMA4C	1
GO:0072202	cell differentiation involved in metanephros development	1/74	22/18986	0.0454545	11.6622	3.13	0.0823714	0.424079	0.400699	GDNF	1
GO:0086012	membrane depolarization during cardiac muscle cell action potential	1/74	22/18986	0.0454545	11.6622	3.13	0.0823714	0.424079	0.400699	HCN4	1
GO:0043405	regulation of MAP kinase activity	2/74	123/18986	0.0162602	4.17183	2.20754	0.0832133	0.424079	0.400699	RGS14/TRIB2	2
GO:0001832	blastocyst growth	1/74	23/18986	0.0434783	11.1551	3.04823	0.0859521	0.424079	0.400699	SALL4	1
GO:0010881	regulation of cardiac muscle contraction by regulation of the release of sequestered calcium ion	1/74	23/18986	0.0434783	11.1551	3.04823	0.0859521	0.424079	0.400699	TMEM38A	1
GO:0034105	positive regulation of tissue remodeling	1/74	23/18986	0.0434783	11.1551	3.04823	0.0859521	0.424079	0.400699	TMBIM1	1
GO:0035855	megakaryocyte development	1/74	23/18986	0.0434783	11.1551	3.04823	0.0859521	0.424079	0.400699	THPO	1
GO:0048015	phosphatidylinositol-mediated signaling	1/74	23/18986	0.0434783	11.1551	3.04823	0.0859521	0.424079	0.400699	PLCD1	1
GO:0060143	positive regulation of syncytium formation by plasma membrane fusion	1/74	23/18986	0.0434783	11.1551	3.04823	0.0859521	0.424079	0.400699	EHD2	1
GO:0071359	cellular response to dsRNA	1/74	23/18986	0.0434783	11.1551	3.04823	0.0859521	0.424079	0.400699	IFIT1	1
GO:0007059	chromosome segregation	4/74	429/18986	0.00932401	2.39224	1.82449	0.0864394	0.424079	0.400699	RGS14/DPF3/KIFC1/RNF212	4
GO:0002718	regulation of cytokine production involved in immune response	2/74	126/18986	0.015873	4.0725	2.16451	0.0867016	0.424079	0.400699	GPRC5B/TLR9	2
GO:0007416	synapse assembly	3/74	269/18986	0.0111524	2.86135	1.92326	0.0877491	0.424079	0.400699	SEMA4C/AMIGO2/KCNJ8	3
GO:0002367	cytokine production involved in immune response	2/74	127/18986	0.015748	4.04043	2.15046	0.0878741	0.424079	0.400699	GPRC5B/TLR9	2
GO:0032479	regulation of type I interferon production	2/74	128/18986	0.015625	4.00887	2.13655	0.0890514	0.424079	0.400699	IRF7/TLR9	2
GO:0032606	type I interferon production	2/74	128/18986	0.015625	4.00887	2.13655	0.0890514	0.424079	0.400699	IRF7/TLR9	2
GO:0002115	store-operated calcium entry	1/74	24/18986	0.0416667	10.6903	2.97135	0.0895191	0.424079	0.400699	EFHB	1
GO:0006925	inflammatory cell apoptotic process	1/74	24/18986	0.0416667	10.6903	2.97135	0.0895191	0.424079	0.400699	IRF7	1
GO:0030277	maintenance of gastrointestinal epithelium	1/74	24/18986	0.0416667	10.6903	2.97135	0.0895191	0.424079	0.400699	TLR9	1
GO:0032770	positive regulation of monooxygenase activity	1/74	24/18986	0.0416667	10.6903	2.97135	0.0895191	0.424079	0.400699	GDNF	1
GO:0034114	regulation of heterotypic cell-cell adhesion	1/74	24/18986	0.0416667	10.6903	2.97135	0.0895191	0.424079	0.400699	GCNT2	1
GO:0061484	hematopoietic stem cell homeostasis	1/74	24/18986	0.0416667	10.6903	2.97135	0.0895191	0.424079	0.400699	GPRASP2	1
GO:0072273	metanephric nephron morphogenesis	1/74	24/18986	0.0416667	10.6903	2.97135	0.0895191	0.424079	0.400699	GDNF	1
GO:0051209	release of sequestered calcium ion into cytosol	2/74	129/18986	0.0155039	3.97779	2.12278	0.0902335	0.424079	0.400699	PLCD1/TMEM38A	2
GO:0051283	negative regulation of sequestering of calcium ion	2/74	130/18986	0.0153846	3.94719	2.10915	0.0914202	0.424079	0.400699	PLCD1/TMEM38A	2
GO:0048762	mesenchymal cell differentiation	3/74	274/18986	0.0109489	2.80913	1.88685	0.0915164	0.424079	0.400699	SEMA4C/GCNT2/GDNF	3
GO:0014059	regulation of dopamine secretion	1/74	25/18986	0.04	10.2627	2.89888	0.0930722	0.424079	0.400699	GDNF	1
GO:0032693	negative regulation of interleukin-10 production	1/74	25/18986	0.04	10.2627	2.89888	0.0930722	0.424079	0.400699	TRIB2	1
GO:0050855	regulation of B cell receptor signaling pathway	1/74	25/18986	0.04	10.2627	2.89888	0.0930722	0.424079	0.400699	CMTM3	1
GO:0060907	positive regulation of macrophage cytokine production	1/74	25/18986	0.04	10.2627	2.89888	0.0930722	0.424079	0.400699	GPRC5B	1
GO:0070861	regulation of protein exit from endoplasmic reticulum	1/74	25/18986	0.04	10.2627	2.89888	0.0930722	0.424079	0.400699	BRSK2	1
GO:0002065	columnar/cuboidal epithelial cell differentiation	2/74	132/18986	0.0151515	3.88739	2.0823	0.0938075	0.424079	0.400699	NTF4/TLR9	2
GO:0051282	regulation of sequestering of calcium ion	2/74	132/18986	0.0151515	3.88739	2.0823	0.0938075	0.424079	0.400699	PLCD1/TMEM38A	2
GO:0002221	pattern recognition receptor signaling pathway	3/74	278/18986	0.0107914	2.76871	1.85831	0.0945785	0.424079	0.400699	IRF7/KCNJ8/TLR9	3
GO:0014902	myotube differentiation	2/74	133/18986	0.0150376	3.85816	2.06907	0.095008	0.424079	0.400699	EHD2/MAMSTR	2
GO:0051896	regulation of phosphatidylinositol 3-kinase/protein kinase B signal transduction	3/74	280/18986	0.0107143	2.74894	1.84423	0.0961254	0.424079	0.400699	PIK3IP1/GCNT2/THPO	3
GO:0001835	blastocyst hatching	1/74	26/18986	0.0384615	9.86798	2.83038	0.0966118	0.424079	0.400699	CMTM3	1
GO:0007274	neuromuscular synaptic transmission	1/74	26/18986	0.0384615	9.86798	2.83038	0.0966118	0.424079	0.400699	CHRNB1	1
GO:0035188	hatching	1/74	26/18986	0.0384615	9.86798	2.83038	0.0966118	0.424079	0.400699	CMTM3	1
GO:0071684	organism emergence from protective structure	1/74	26/18986	0.0384615	9.86798	2.83038	0.0966118	0.424079	0.400699	CMTM3	1
GO:0098581	detection of external biotic stimulus	1/74	26/18986	0.0384615	9.86798	2.83038	0.0966118	0.424079	0.400699	TLR9	1
GO:0098719	sodium ion import across plasma membrane	1/74	26/18986	0.0384615	9.86798	2.83038	0.0966118	0.424079	0.400699	HCN4	1
GO:1902455	negative regulation of stem cell population maintenance	1/74	26/18986	0.0384615	9.86798	2.83038	0.0966118	0.424079	0.400699	TET1	1
GO:0046683	response to organophosphorus	2/74	135/18986	0.0148148	3.801	2.04299	0.0974224	0.424079	0.400699	HCN4/KCNJ8	2
GO:0007611	learning or memory	3/74	282/18986	0.0106383	2.72944	1.83027	0.0976828	0.424079	0.400699	RGS14/PAK6/NTF4	3
GO:0051208	sequestering of calcium ion	2/74	136/18986	0.0147059	3.77305	2.03013	0.0986361	0.424079	0.400699	PLCD1/TMEM38A	2
GO:1903052	positive regulation of proteolysis involved in protein catabolic process	2/74	137/18986	0.0145985	3.74551	2.0174	0.0998542	0.424079	0.400699	TRIB2/ECSCR	2
GO:0009312	oligosaccharide biosynthetic process	1/74	27/18986	0.037037	9.5025	2.7655	0.100138	0.424079	0.400699	FUT2	1
GO:0098664	G protein-coupled serotonin receptor signaling pathway	1/74	27/18986	0.037037	9.5025	2.7655	0.100138	0.424079	0.400699	HTR1D	1
GO:2000353	positive regulation of endothelial cell apoptotic process	1/74	27/18986	0.037037	9.5025	2.7655	0.100138	0.424079	0.400699	ECSCR	1
GO:0002702	positive regulation of production of molecular mediator of immune response	2/74	140/18986	0.0142857	3.66525	1.97991	0.103534	0.424079	0.400699	GPRC5B/TLR9	2
GO:0030048	actin filament-based movement	2/74	140/18986	0.0142857	3.66525	1.97991	0.103534	0.424079	0.400699	HCN4/KCNJ8	2
GO:0003156	regulation of animal organ formation	1/74	28/18986	0.0357143	9.16313	2.70391	0.10365	0.424079	0.400699	GDNF	1
GO:0010882	regulation of cardiac muscle contraction by calcium ion signaling	1/74	28/18986	0.0357143	9.16313	2.70391	0.10365	0.424079	0.400699	TMEM38A	1
GO:0050857	positive regulation of antigen receptor-mediated signaling pathway	1/74	28/18986	0.0357143	9.16313	2.70391	0.10365	0.424079	0.400699	CMTM3	1
GO:0060575	intestinal epithelial cell differentiation	1/74	28/18986	0.0357143	9.16313	2.70391	0.10365	0.424079	0.400699	TLR9	1
GO:0086013	membrane repolarization during cardiac muscle cell action potential	1/74	28/18986	0.0357143	9.16313	2.70391	0.10365	0.424079	0.400699	KCNJ8	1
GO:0099637	neurotransmitter receptor transport	1/74	28/18986	0.0357143	9.16313	2.70391	0.10365	0.424079	0.400699	CACNG8	1
GO:2000819	regulation of nucleotide-excision repair	1/74	28/18986	0.0357143	9.16313	2.70391	0.10365	0.424079	0.400699	DPF3	1
GO:0001773	myeloid dendritic cell activation	1/74	29/18986	0.0344828	8.84716	2.64532	0.107149	0.424079	0.400699	TSPAN32	1
GO:0007342	fusion of sperm to egg plasma membrane involved in single fertilization	1/74	29/18986	0.0344828	8.84716	2.64532	0.107149	0.424079	0.400699	GLIPR1L1	1
GO:0030970	retrograde protein transport, ER to cytosol	1/74	29/18986	0.0344828	8.84716	2.64532	0.107149	0.424079	0.400699	BRSK2	1
GO:0042832	defense response to protozoan	1/74	29/18986	0.0344828	8.84716	2.64532	0.107149	0.424079	0.400699	TSPAN32	1
GO:0060142	regulation of syncytium formation by plasma membrane fusion	1/74	29/18986	0.0344828	8.84716	2.64532	0.107149	0.424079	0.400699	EHD2	1
GO:0060384	innervation	1/74	29/18986	0.0344828	8.84716	2.64532	0.107149	0.424079	0.400699	NTF4	1
GO:0098901	regulation of cardiac muscle cell action potential	1/74	29/18986	0.0344828	8.84716	2.64532	0.107149	0.424079	0.400699	HCN4	1
GO:1903513	endoplasmic reticulum to cytosol transport	1/74	29/18986	0.0344828	8.84716	2.64532	0.107149	0.424079	0.400699	BRSK2	1
GO:0002758	innate immune response-activating signaling pathway	3/74	297/18986	0.010101	2.59159	1.7293	0.109687	0.424079	0.400699	IRF7/KCNJ8/TLR9	3
GO:0051962	positive regulation of nervous system development	3/74	297/18986	0.010101	2.59159	1.7293	0.109687	0.424079	0.400699	AMIGO2/RGS14/GJC2	3
GO:0001736	establishment of planar polarity	1/74	30/18986	0.0333333	8.55225	2.5895	0.110634	0.424079	0.400699	BRSK2	1
GO:0001963	synaptic transmission, dopaminergic	1/74	30/18986	0.0333333	8.55225	2.5895	0.110634	0.424079	0.400699	GDNF	1
GO:0007164	establishment of tissue polarity	1/74	30/18986	0.0333333	8.55225	2.5895	0.110634	0.424079	0.400699	BRSK2	1
GO:0014046	dopamine secretion	1/74	30/18986	0.0333333	8.55225	2.5895	0.110634	0.424079	0.400699	GDNF	1
GO:0086010	membrane depolarization during action potential	1/74	30/18986	0.0333333	8.55225	2.5895	0.110634	0.424079	0.400699	HCN4	1
GO:1903077	negative regulation of protein localization to plasma membrane	1/74	30/18986	0.0333333	8.55225	2.5895	0.110634	0.424079	0.400699	TMBIM1	1
GO:0006935	chemotaxis	4/74	472/18986	0.00847458	2.1743	1.61604	0.112357	0.424079	0.400699	SEMA4C/CMTM3/GDNF/ECSCR	4
GO:0043410	positive regulation of MAPK cascade	4/74	472/18986	0.00847458	2.1743	1.61604	0.112357	0.424079	0.400699	SEMA4C/GCNT2/THPO/TLR9	4
GO:0046488	phosphatidylinositol metabolic process	2/74	148/18986	0.0135135	3.46713	1.88477	0.113524	0.424079	0.400699	INPP5J/PLCD1	2
GO:0042330	taxis	4/74	474/18986	0.00843882	2.16513	1.6069	0.113639	0.424079	0.400699	SEMA4C/CMTM3/GDNF/ECSCR	4
GO:0003338	metanephros morphogenesis	1/74	31/18986	0.0322581	8.27637	2.53622	0.114106	0.424079	0.400699	GDNF	1
GO:0014047	glutamate secretion	1/74	31/18986	0.0322581	8.27637	2.53622	0.114106	0.424079	0.400699	KCNJ8	1
GO:0045070	positive regulation of viral genome replication	1/74	31/18986	0.0322581	8.27637	2.53622	0.114106	0.424079	0.400699	IFIT1	1
GO:0086019	cell-cell signaling involved in cardiac conduction	1/74	31/18986	0.0322581	8.27637	2.53622	0.114106	0.424079	0.400699	HCN4	1
GO:0090382	phagosome maturation	1/74	31/18986	0.0322581	8.27637	2.53622	0.114106	0.424079	0.400699	RAB43	1
GO:0099505	regulation of presynaptic membrane potential	1/74	31/18986	0.0322581	8.27637	2.53622	0.114106	0.424079	0.400699	KCNJ8	1
GO:0099625	ventricular cardiac muscle cell membrane repolarization	1/74	31/18986	0.0322581	8.27637	2.53622	0.114106	0.424079	0.400699	KCNJ8	1
GO:1901020	negative regulation of calcium ion transmembrane transporter activity	1/74	31/18986	0.0322581	8.27637	2.53622	0.114106	0.424079	0.400699	TLR9	1
GO:0046467	membrane lipid biosynthetic process	2/74	149/18986	0.0134228	3.44386	1.87334	0.11479	0.424079	0.400699	FUT2/B3GNT5	2
GO:0006874	intracellular calcium ion homeostasis	3/74	304/18986	0.00986842	2.53192	1.68427	0.115477	0.424079	0.400699	PLCD1/TMEM38A/GRID2IP	3
GO:0043122	regulation of canonical NF-kappaB signal transduction	3/74	305/18986	0.00983607	2.52362	1.67794	0.116314	0.424079	0.400699	TNFSF10/GPRC5B/TLR9	3
GO:0008584	male gonad development	2/74	151/18986	0.013245	3.39825	1.85077	0.117333	0.424079	0.400699	TNFSF10/TLR9	2
GO:0021915	neural tube development	2/74	151/18986	0.013245	3.39825	1.85077	0.117333	0.424079	0.400699	SEMA4C/SALL4	2
GO:0001562	response to protozoan	1/74	32/18986	0.03125	8.01774	2.48527	0.117564	0.424079	0.400699	TSPAN32	1
GO:0007271	synaptic transmission, cholinergic	1/74	32/18986	0.03125	8.01774	2.48527	0.117564	0.424079	0.400699	CHRNB1	1
GO:0010644	cell communication by electrical coupling	1/74	32/18986	0.03125	8.01774	2.48527	0.117564	0.424079	0.400699	GJC2	1
GO:0086011	membrane repolarization during action potential	1/74	32/18986	0.03125	8.01774	2.48527	0.117564	0.424079	0.400699	KCNJ8	1
GO:1902042	negative regulation of extrinsic apoptotic signaling pathway via death domain receptors	1/74	32/18986	0.03125	8.01774	2.48527	0.117564	0.424079	0.400699	TMBIM1	1
GO:1904376	negative regulation of protein localization to cell periphery	1/74	32/18986	0.03125	8.01774	2.48527	0.117564	0.424079	0.400699	TMBIM1	1
GO:0051402	neuron apoptotic process	3/74	307/18986	0.00977199	2.50717	1.66536	0.117994	0.424079	0.400699	TMBIM1/GDNF/NTF4	3
GO:0046546	development of primary male sexual characteristics	2/74	152/18986	0.0131579	3.37589	1.83962	0.11861	0.424079	0.400699	TNFSF10/TLR9	2
GO:0072073	kidney epithelium development	2/74	153/18986	0.0130719	3.35382	1.82857	0.11989	0.424079	0.400699	GDNF/SIM1	2
GO:0010880	regulation of release of sequestered calcium ion into cytosol by sarcoplasmic reticulum	1/74	33/18986	0.030303	7.77477	2.43649	0.12101	0.424079	0.400699	TMEM38A	1
GO:0031128	developmental induction	1/74	33/18986	0.030303	7.77477	2.43649	0.12101	0.424079	0.400699	GDNF	1
GO:0033032	regulation of myeloid cell apoptotic process	1/74	33/18986	0.030303	7.77477	2.43649	0.12101	0.424079	0.400699	IRF7	1
GO:0033198	response to ATP	1/74	33/18986	0.030303	7.77477	2.43649	0.12101	0.424079	0.400699	KCNJ8	1
GO:0033238	regulation of amine metabolic process	1/74	33/18986	0.030303	7.77477	2.43649	0.12101	0.424079	0.400699	PAOX	1
GO:0043045	epigenetic programming of gene expression	1/74	33/18986	0.030303	7.77477	2.43649	0.12101	0.424079	0.400699	TET1	1
GO:0045026	plasma membrane fusion	1/74	33/18986	0.030303	7.77477	2.43649	0.12101	0.424079	0.400699	GLIPR1L1	1
GO:0099560	synaptic membrane adhesion	1/74	33/18986	0.030303	7.77477	2.43649	0.12101	0.424079	0.400699	ELFN2	1
GO:0035296	regulation of tube diameter	2/74	154/18986	0.012987	3.33205	1.81761	0.121174	0.424079	0.400699	HTR1D/KCNJ8	2
GO:0097746	blood vessel diameter maintenance	2/74	154/18986	0.012987	3.33205	1.81761	0.121174	0.424079	0.400699	HTR1D/KCNJ8	2
GO:0006469	negative regulation of protein kinase activity	2/74	155/18986	0.0129032	3.31055	1.80674	0.122462	0.424079	0.400699	RGS14/TRIB2	2
GO:0035150	regulation of tube size	2/74	155/18986	0.0129032	3.31055	1.80674	0.122462	0.424079	0.400699	HTR1D/KCNJ8	2
GO:0051146	striated muscle cell differentiation	3/74	314/18986	0.00955414	2.45128	1.62209	0.123946	0.424079	0.400699	EHD2/MAMSTR/KCNJ8	3
GO:0006536	glutamate metabolic process	1/74	34/18986	0.0294118	7.5461	2.38972	0.124442	0.424079	0.400699	NAGS	1
GO:0019068	virion assembly	1/74	34/18986	0.0294118	7.5461	2.38972	0.124442	0.424079	0.400699	RAB43	1
GO:0051873	killing by host of symbiont cells	1/74	34/18986	0.0294118	7.5461	2.38972	0.124442	0.424079	0.400699	GSDMB	1
GO:0060292	long-term synaptic depression	1/74	34/18986	0.0294118	7.5461	2.38972	0.124442	0.424079	0.400699	GRID2IP	1
GO:0140058	neuron projection arborization	1/74	34/18986	0.0294118	7.5461	2.38972	0.124442	0.424079	0.400699	PAK6	1
GO:0007030	Golgi organization	2/74	157/18986	0.0127389	3.26838	1.78527	0.125047	0.424079	0.400699	RAB43/ATP8B3	2
GO:0002218	activation of innate immune response	3/74	317/18986	0.00946372	2.42808	1.60389	0.126531	0.424079	0.400699	IRF7/KCNJ8/TLR9	3
GO:0043491	phosphatidylinositol 3-kinase/protein kinase B signal transduction	3/74	317/18986	0.00946372	2.42808	1.60389	0.126531	0.424079	0.400699	PIK3IP1/GCNT2/THPO	3
GO:0007612	learning	2/74	159/18986	0.0125786	3.22727	1.76414	0.127645	0.424079	0.400699	RGS14/PAK6	2
GO:0006884	cell volume homeostasis	1/74	35/18986	0.0285714	7.3305	2.34481	0.12786	0.424079	0.400699	GPRC5B	1
GO:0045577	regulation of B cell differentiation	1/74	35/18986	0.0285714	7.3305	2.34481	0.12786	0.424079	0.400699	TLR9	1
GO:0061081	positive regulation of myeloid leukocyte cytokine production involved in immune response	1/74	35/18986	0.0285714	7.3305	2.34481	0.12786	0.424079	0.400699	GPRC5B	1
GO:0086004	regulation of cardiac muscle cell contraction	1/74	35/18986	0.0285714	7.3305	2.34481	0.12786	0.424079	0.400699	HCN4	1
GO:0090183	regulation of kidney development	1/74	35/18986	0.0285714	7.3305	2.34481	0.12786	0.424079	0.400699	GDNF	1
GO:0098810	neurotransmitter reuptake	1/74	35/18986	0.0285714	7.3305	2.34481	0.12786	0.424079	0.400699	GDNF	1
GO:0110110	positive regulation of animal organ morphogenesis	1/74	35/18986	0.0285714	7.3305	2.34481	0.12786	0.424079	0.400699	GDNF	1
GO:0001822	kidney development	3/74	322/18986	0.00931677	2.39038	1.57403	0.130882	0.424079	0.400699	GDNF/KCNJ8/SIM1	3
GO:0002009	morphogenesis of an epithelium	4/74	500/18986	0.008	2.05254	1.49195	0.130898	0.424079	0.400699	SEMA4C/SALL4/BRSK2/GDNF	4
GO:0030224	monocyte differentiation	1/74	36/18986	0.0277778	7.12688	2.30164	0.131266	0.424079	0.400699	IRF7	1
GO:0051968	positive regulation of synaptic transmission, glutamatergic	1/74	36/18986	0.0277778	7.12688	2.30164	0.131266	0.424079	0.400699	CACNG8	1
GO:0086005	ventricular cardiac muscle cell action potential	1/74	36/18986	0.0277778	7.12688	2.30164	0.131266	0.424079	0.400699	KCNJ8	1
GO:1901099	negative regulation of signal transduction in absence of ligand	1/74	36/18986	0.0277778	7.12688	2.30164	0.131266	0.424079	0.400699	GDNF	1
GO:1905332	positive regulation of morphogenesis of an epithelium	1/74	36/18986	0.0277778	7.12688	2.30164	0.131266	0.424079	0.400699	GDNF	1
GO:2001240	negative regulation of extrinsic apoptotic signaling pathway in absence of ligand	1/74	36/18986	0.0277778	7.12688	2.30164	0.131266	0.424079	0.400699	GDNF	1
GO:0050729	positive regulation of inflammatory response	2/74	162/18986	0.0123457	3.1675	1.73306	0.131566	0.424079	0.400699	GPRC5B/TLR9	2
GO:0098813	nuclear chromosome segregation	3/74	324/18986	0.00925926	2.37563	1.56223	0.132637	0.424079	0.400699	DPF3/KIFC1/RNF212	3
GO:0045862	positive regulation of proteolysis	3/74	325/18986	0.00923077	2.36832	1.55637	0.133518	0.424079	0.400699	TNFSF10/TRIB2/ECSCR	3
GO:0030010	establishment of cell polarity	2/74	164/18986	0.0121951	3.12887	1.71274	0.134196	0.424079	0.400699	BRSK2/KCNJ8	2
GO:0008340	determination of adult lifespan	1/74	37/18986	0.027027	6.93426	2.26009	0.134658	0.424079	0.400699	KCNJ8	1
GO:0010092	specification of animal organ identity	1/74	37/18986	0.027027	6.93426	2.26009	0.134658	0.424079	0.400699	GDNF	1
GO:0048265	response to pain	1/74	37/18986	0.027027	6.93426	2.26009	0.134658	0.424079	0.400699	LPAR5	1
GO:0051353	positive regulation of oxidoreductase activity	1/74	37/18986	0.027027	6.93426	2.26009	0.134658	0.424079	0.400699	GDNF	1
GO:0071425	hematopoietic stem cell proliferation	1/74	37/18986	0.027027	6.93426	2.26009	0.134658	0.424079	0.400699	THPO	1
GO:0099601	regulation of neurotransmitter receptor activity	1/74	37/18986	0.027027	6.93426	2.26009	0.134658	0.424079	0.400699	CACNG8	1
GO:0007249	canonical NF-kappaB signal transduction	3/74	327/18986	0.00917431	2.35383	1.54471	0.135285	0.424079	0.400699	TNFSF10/GPRC5B/TLR9	3
GO:0033673	negative regulation of kinase activity	2/74	166/18986	0.0120482	3.09118	1.69273	0.136838	0.424079	0.400699	RGS14/TRIB2	2
GO:0050890	cognition	3/74	329/18986	0.00911854	2.33952	1.53313	0.137061	0.424079	0.400699	RGS14/PAK6/NTF4	3
GO:0055074	calcium ion homeostasis	3/74	329/18986	0.00911854	2.33952	1.53313	0.137061	0.424079	0.400699	PLCD1/TMEM38A/GRID2IP	3
GO:0007339	binding of sperm to zona pellucida	1/74	38/18986	0.0263158	6.75178	2.22006	0.138038	0.424079	0.400699	ATP8B3	1
GO:0010669	epithelial structure maintenance	1/74	38/18986	0.0263158	6.75178	2.22006	0.138038	0.424079	0.400699	TLR9	1
GO:0010934	macrophage cytokine production	1/74	38/18986	0.0263158	6.75178	2.22006	0.138038	0.424079	0.400699	GPRC5B	1
GO:0010935	regulation of macrophage cytokine production	1/74	38/18986	0.0263158	6.75178	2.22006	0.138038	0.424079	0.400699	GPRC5B	1
GO:0014808	release of sequestered calcium ion into cytosol by sarcoplasmic reticulum	1/74	38/18986	0.0263158	6.75178	2.22006	0.138038	0.424079	0.400699	TMEM38A	1
GO:0034121	regulation of toll-like receptor signaling pathway	1/74	38/18986	0.0263158	6.75178	2.22006	0.138038	0.424079	0.400699	IRF7	1
GO:0042401	biogenic amine biosynthetic process	1/74	38/18986	0.0263158	6.75178	2.22006	0.138038	0.424079	0.400699	PAOX	1
GO:0045652	regulation of megakaryocyte differentiation	1/74	38/18986	0.0263158	6.75178	2.22006	0.138038	0.424079	0.400699	THPO	1
GO:0070316	regulation of G0 to G1 transition	1/74	38/18986	0.0263158	6.75178	2.22006	0.138038	0.424079	0.400699	DPF3	1
GO:0060562	epithelial tube morphogenesis	3/74	331/18986	0.00906344	2.32539	1.52164	0.138846	0.424079	0.400699	SEMA4C/SALL4/GDNF	3
GO:0051963	regulation of synapse assembly	2/74	168/18986	0.0119048	3.05438	1.67302	0.139492	0.424079	0.400699	SEMA4C/AMIGO2	2
GO:0072001	renal system development	3/74	332/18986	0.00903614	2.31838	1.51592	0.139741	0.424079	0.400699	GDNF/KCNJ8/SIM1	3
GO:0009309	amine biosynthetic process	1/74	39/18986	0.025641	6.57866	2.18144	0.141404	0.424079	0.400699	PAOX	1
GO:0009595	detection of biotic stimulus	1/74	39/18986	0.025641	6.57866	2.18144	0.141404	0.424079	0.400699	TLR9	1
GO:0032768	regulation of monooxygenase activity	1/74	39/18986	0.025641	6.57866	2.18144	0.141404	0.424079	0.400699	GDNF	1
GO:0032872	regulation of stress-activated MAPK cascade	1/74	39/18986	0.025641	6.57866	2.18144	0.141404	0.424079	0.400699	SEMA4C	1
GO:0070884	regulation of calcineurin-NFAT signaling cascade	1/74	39/18986	0.025641	6.57866	2.18144	0.141404	0.424079	0.400699	EFHB	1
GO:0071312	cellular response to alkaloid	1/74	39/18986	0.025641	6.57866	2.18144	0.141404	0.424079	0.400699	TMEM38A	1
GO:1905476	negative regulation of protein localization to membrane	1/74	39/18986	0.025641	6.57866	2.18144	0.141404	0.424079	0.400699	TMBIM1	1
GO:0006730	one-carbon metabolic process	1/74	40/18986	0.025	6.41419	2.14416	0.144757	0.424079	0.400699	CA14	1
GO:0016266	O-glycan processing	1/74	40/18986	0.025	6.41419	2.14416	0.144757	0.424079	0.400699	B3GNT5	1
GO:0033028	myeloid cell apoptotic process	1/74	40/18986	0.025	6.41419	2.14416	0.144757	0.424079	0.400699	IRF7	1
GO:0038179	neurotrophin signaling pathway	1/74	40/18986	0.025	6.41419	2.14416	0.144757	0.424079	0.400699	NTF4	1
GO:0044546	NLRP3 inflammasome complex assembly	1/74	40/18986	0.025	6.41419	2.14416	0.144757	0.424079	0.400699	KCNJ8	1
GO:0045023	G0 to G1 transition	1/74	40/18986	0.025	6.41419	2.14416	0.144757	0.424079	0.400699	DPF3	1
GO:0070269	pyroptotic inflammatory response	1/74	40/18986	0.025	6.41419	2.14416	0.144757	0.424079	0.400699	GSDMB	1
GO:0086091	regulation of heart rate by cardiac conduction	1/74	40/18986	0.025	6.41419	2.14416	0.144757	0.424079	0.400699	HCN4	1
GO:0090199	regulation of release of cytochrome c from mitochondria	1/74	40/18986	0.025	6.41419	2.14416	0.144757	0.424079	0.400699	TNFSF10	1
GO:0099590	neurotransmitter receptor internalization	1/74	40/18986	0.025	6.41419	2.14416	0.144757	0.424079	0.400699	CACNG8	1
GO:0106056	regulation of calcineurin-mediated signaling	1/74	40/18986	0.025	6.41419	2.14416	0.144757	0.424079	0.400699	EFHB	1
GO:1903514	release of sequestered calcium ion into cytosol by endoplasmic reticulum	1/74	40/18986	0.025	6.41419	2.14416	0.144757	0.424079	0.400699	TMEM38A	1
GO:0003205	cardiac chamber development	2/74	172/18986	0.0116279	2.98334	1.63446	0.144833	0.424079	0.400699	SALL4/KCNJ8	2
GO:0030856	regulation of epithelial cell differentiation	2/74	172/18986	0.0116279	2.98334	1.63446	0.144833	0.424079	0.400699	GDNF/TLR9	2
GO:0043409	negative regulation of MAPK cascade	2/74	172/18986	0.0116279	2.98334	1.63446	0.144833	0.424079	0.400699	RGS14/TLR9	2
GO:0006665	sphingolipid metabolic process	2/74	173/18986	0.0115607	2.9661	1.62499	0.146175	0.424477	0.401075	FUT2/B3GNT5	2
GO:0007009	plasma membrane organization	2/74	173/18986	0.0115607	2.9661	1.62499	0.146175	0.424477	0.401075	EHD2/GLIPR1L1	2
GO:0170039	proteinogenic amino acid metabolic process	2/74	174/18986	0.0114943	2.94905	1.6156	0.14752	0.424477	0.401075	RIMKLA/NAGS	2
GO:0060485	mesenchyme development	3/74	341/18986	0.00879765	2.25719	1.46538	0.147885	0.424477	0.401075	SEMA4C/GCNT2/GDNF	3
GO:0043407	negative regulation of MAP kinase activity	1/74	41/18986	0.0243902	6.25775	2.10813	0.148098	0.424477	0.401075	RGS14	1
GO:0051954	positive regulation of amine transport	1/74	41/18986	0.0243902	6.25775	2.10813	0.148098	0.424477	0.401075	GDNF	1
GO:0070302	regulation of stress-activated protein kinase signaling cascade	1/74	41/18986	0.0243902	6.25775	2.10813	0.148098	0.424477	0.401075	SEMA4C	1
GO:0072210	metanephric nephron development	1/74	41/18986	0.0243902	6.25775	2.10813	0.148098	0.424477	0.401075	GDNF	1
GO:1903115	regulation of actin filament-based movement	1/74	41/18986	0.0243902	6.25775	2.10813	0.148098	0.424477	0.401075	HCN4	1
GO:0007338	single fertilization	2/74	175/18986	0.0114286	2.9322	1.60627	0.148867	0.424688	0.401275	ATP8B3/GLIPR1L1	2
GO:0046661	male sex differentiation	2/74	175/18986	0.0114286	2.9322	1.60627	0.148867	0.424688	0.401275	TNFSF10/TLR9	2
GO:0050806	positive regulation of synaptic transmission	2/74	176/18986	0.0113636	2.91554	1.597	0.150217	0.425439	0.401984	RGS14/CACNG8	2
GO:0032733	positive regulation of interleukin-10 production	1/74	42/18986	0.0238095	6.10875	2.07327	0.151425	0.425439	0.401984	TLR9	1
GO:0050433	regulation of catecholamine secretion	1/74	42/18986	0.0238095	6.10875	2.07327	0.151425	0.425439	0.401984	GDNF	1
GO:0061097	regulation of protein tyrosine kinase activity	1/74	42/18986	0.0238095	6.10875	2.07327	0.151425	0.425439	0.401984	GPRC5B	1
GO:0099622	cardiac muscle cell membrane repolarization	1/74	42/18986	0.0238095	6.10875	2.07327	0.151425	0.425439	0.401984	KCNJ8	1
GO:0140632	canonical inflammasome complex assembly	1/74	42/18986	0.0238095	6.10875	2.07327	0.151425	0.425439	0.401984	KCNJ8	1
GO:0001508	action potential	2/74	177/18986	0.0112994	2.89907	1.5878	0.151569	0.425439	0.401984	HCN4/KCNJ8	2
GO:0015718	monocarboxylic acid transport	2/74	179/18986	0.0111732	2.86668	1.5696	0.154281	0.429404	0.40573	KCNJ8/RBP5	2
GO:0030866	cortical actin cytoskeleton organization	1/74	43/18986	0.0232558	5.96669	2.03953	0.15474	0.429404	0.40573	EHD2	1
GO:0031111	negative regulation of microtubule polymerization or depolymerization	1/74	43/18986	0.0232558	5.96669	2.03953	0.15474	0.429404	0.40573	INPP5J	1
GO:0043647	inositol phosphate metabolic process	1/74	43/18986	0.0232558	5.96669	2.03953	0.15474	0.429404	0.40573	INPP5J	1
GO:0051938	L-glutamate import	1/74	43/18986	0.0232558	5.96669	2.03953	0.15474	0.429404	0.40573	KCNJ8	1
GO:0170033	L-amino acid metabolic process	2/74	181/18986	0.0110497	2.835	1.55164	0.157003	0.434695	0.41073	RIMKLA/NAGS	2
GO:0032735	positive regulation of interleukin-12 production	1/74	44/18986	0.0227273	5.83108	2.00683	0.158042	0.435597	0.411581	TLR9	1
GO:0150052	regulation of postsynapse assembly	1/74	44/18986	0.0227273	5.83108	2.00683	0.158042	0.435597	0.411581	SEMA4C	1
GO:0062207	regulation of pattern recognition receptor signaling pathway	2/74	184/18986	0.0108696	2.78878	1.52516	0.161103	0.436775	0.412695	IRF7/TLR9	2
GO:0001825	blastocyst formation	1/74	45/18986	0.0222222	5.7015	1.97512	0.161331	0.436775	0.412695	TET1	1
GO:0015872	dopamine transport	1/74	45/18986	0.0222222	5.7015	1.97512	0.161331	0.436775	0.412695	GDNF	1
GO:0060338	regulation of type I interferon-mediated signaling pathway	1/74	45/18986	0.0222222	5.7015	1.97512	0.161331	0.436775	0.412695	IRF7	1
GO:0070296	sarcoplasmic reticulum calcium ion transport	1/74	45/18986	0.0222222	5.7015	1.97512	0.161331	0.436775	0.412695	TMEM38A	1
GO:0095500	acetylcholine receptor signaling pathway	1/74	45/18986	0.0222222	5.7015	1.97512	0.161331	0.436775	0.412695	CHRNB1	1
GO:1904646	cellular response to amyloid-beta	1/74	45/18986	0.0222222	5.7015	1.97512	0.161331	0.436775	0.412695	CACNB1	1
GO:2001239	regulation of extrinsic apoptotic signaling pathway in absence of ligand	1/74	45/18986	0.0222222	5.7015	1.97512	0.161331	0.436775	0.412695	GDNF	1
GO:0046942	carboxylic acid transport	3/74	357/18986	0.00840336	2.15603	1.37931	0.162736	0.437878	0.413737	SLC23A1/KCNJ8/RBP5	3
GO:0015849	organic acid transport	3/74	358/18986	0.00837989	2.15001	1.37408	0.163679	0.437878	0.413737	SLC23A1/KCNJ8/RBP5	3
GO:0019827	stem cell population maintenance	2/74	186/18986	0.0107527	2.75879	1.5078	0.163847	0.437878	0.413737	TET1/SALL4	2
GO:0001504	neurotransmitter uptake	1/74	46/18986	0.0217391	5.57756	1.94435	0.164608	0.437878	0.413737	GDNF	1
GO:0030890	positive regulation of B cell proliferation	1/74	46/18986	0.0217391	5.57756	1.94435	0.164608	0.437878	0.413737	TLR9	1
GO:0045663	positive regulation of myoblast differentiation	1/74	46/18986	0.0217391	5.57756	1.94435	0.164608	0.437878	0.413737	DPF3	1
GO:0048483	autonomic nervous system development	1/74	46/18986	0.0217391	5.57756	1.94435	0.164608	0.437878	0.413737	GDNF	1
GO:0060071	Wnt signaling pathway, planar cell polarity pathway	1/74	46/18986	0.0217391	5.57756	1.94435	0.164608	0.437878	0.413737	ARHGEF19	1
GO:0032412	regulation of monoatomic ion transmembrane transporter activity	2/74	188/18986	0.0106383	2.72944	1.49067	0.1666	0.438255	0.414093	CACNG8/TLR9	2
GO:0035725	sodium ion transmembrane transport	2/74	188/18986	0.0106383	2.72944	1.49067	0.1666	0.438255	0.414093	HCN4/SLC23A1	2
GO:0010830	regulation of myotube differentiation	1/74	47/18986	0.0212766	5.45888	1.91447	0.167872	0.438255	0.414093	MAMSTR	1
GO:0032527	protein exit from endoplasmic reticulum	1/74	47/18986	0.0212766	5.45888	1.91447	0.167872	0.438255	0.414093	BRSK2	1
GO:0033173	calcineurin-NFAT signaling cascade	1/74	47/18986	0.0212766	5.45888	1.91447	0.167872	0.438255	0.414093	EFHB	1
GO:0050919	negative chemotaxis	1/74	47/18986	0.0212766	5.45888	1.91447	0.167872	0.438255	0.414093	SEMA4C	1
GO:0141084	inflammasome-mediated signaling pathway	1/74	47/18986	0.0212766	5.45888	1.91447	0.167872	0.438255	0.414093	KCNJ8	1
GO:1905145	cellular response to acetylcholine	1/74	47/18986	0.0212766	5.45888	1.91447	0.167872	0.438255	0.414093	CHRNB1	1
GO:0097553	calcium ion transmembrane import into cytosol	2/74	189/18986	0.010582	2.715	1.48219	0.16798	0.438255	0.414093	PLCD1/TMEM38A	2
GO:0051348	negative regulation of transferase activity	2/74	190/18986	0.0105263	2.70071	1.47376	0.169361	0.439979	0.415722	RGS14/TRIB2	2
GO:0098727	maintenance of cell number	2/74	190/18986	0.0105263	2.70071	1.47376	0.169361	0.439979	0.415722	TET1/SALL4	2
GO:2000045	regulation of G1/S transition of mitotic cell cycle	2/74	191/18986	0.0104712	2.68657	1.46539	0.170745	0.441736	0.417383	DPF3/GJC2	2
GO:0007157	heterophilic cell-cell adhesion via plasma membrane cell adhesion molecules	1/74	48/18986	0.0208333	5.34516	1.88543	0.171123	0.441736	0.417383	AMIGO2	1
GO:0007520	myoblast fusion	1/74	48/18986	0.0208333	5.34516	1.88543	0.171123	0.441736	0.417383	EHD2	1
GO:0051897	positive regulation of phosphatidylinositol 3-kinase/protein kinase B signal transduction	2/74	192/18986	0.0104167	2.67258	1.45707	0.172131	0.443399	0.418954	GCNT2/THPO	2
GO:0035850	epithelial cell differentiation involved in kidney development	1/74	49/18986	0.0204082	5.23607	1.8572	0.174362	0.444459	0.419955	GDNF	1
GO:0050432	catecholamine secretion	1/74	49/18986	0.0204082	5.23607	1.8572	0.174362	0.444459	0.419955	GDNF	1
GO:0097720	calcineurin-mediated signaling	1/74	49/18986	0.0204082	5.23607	1.8572	0.174362	0.444459	0.419955	EFHB	1
GO:1902041	regulation of extrinsic apoptotic signaling pathway via death domain receptors	1/74	49/18986	0.0204082	5.23607	1.8572	0.174362	0.444459	0.419955	TMBIM1	1
GO:1902459	positive regulation of stem cell population maintenance	1/74	49/18986	0.0204082	5.23607	1.8572	0.174362	0.444459	0.419955	TET1	1
GO:0003254	regulation of membrane depolarization	1/74	50/18986	0.02	5.13135	1.82972	0.177588	0.445979	0.421391	HCN4	1
GO:0019320	hexose catabolic process	1/74	50/18986	0.02	5.13135	1.82972	0.177588	0.445979	0.421391	FUT2	1
GO:0060976	coronary vasculature development	1/74	50/18986	0.02	5.13135	1.82972	0.177588	0.445979	0.421391	KCNJ8	1
GO:0061082	myeloid leukocyte cytokine production	1/74	50/18986	0.02	5.13135	1.82972	0.177588	0.445979	0.421391	GPRC5B	1
GO:0140894	endolysosomal toll-like receptor signaling pathway	1/74	50/18986	0.02	5.13135	1.82972	0.177588	0.445979	0.421391	TLR9	1
GO:1905144	response to acetylcholine	1/74	50/18986	0.02	5.13135	1.82972	0.177588	0.445979	0.421391	CHRNB1	1
GO:0002700	regulation of production of molecular mediator of immune response	2/74	196/18986	0.0102041	2.61804	1.42431	0.177692	0.445979	0.421391	GPRC5B/TLR9	2
GO:0022898	regulation of transmembrane transporter activity	2/74	197/18986	0.0101523	2.60475	1.41625	0.179086	0.445979	0.421391	CACNG8/TLR9	2
GO:0070374	positive regulation of ERK1 and ERK2 cascade	2/74	197/18986	0.0101523	2.60475	1.41625	0.179086	0.445979	0.421391	GCNT2/THPO	2
GO:0006636	unsaturated fatty acid biosynthetic process	1/74	51/18986	0.0196078	5.03074	1.80297	0.180802	0.445979	0.421391	SCD5	1
GO:0008542	visual learning	1/74	51/18986	0.0196078	5.03074	1.80297	0.180802	0.445979	0.421391	RGS14	1
GO:0035036	sperm-egg recognition	1/74	51/18986	0.0196078	5.03074	1.80297	0.180802	0.445979	0.421391	ATP8B3	1
GO:0042311	vasodilation	1/74	51/18986	0.0196078	5.03074	1.80297	0.180802	0.445979	0.421391	KCNJ8	1
GO:0045933	positive regulation of muscle contraction	1/74	51/18986	0.0196078	5.03074	1.80297	0.180802	0.445979	0.421391	CACNB1	1
GO:0051155	positive regulation of striated muscle cell differentiation	1/74	51/18986	0.0196078	5.03074	1.80297	0.180802	0.445979	0.421391	MAMSTR	1
GO:1990090	cellular response to nerve growth factor stimulus	1/74	51/18986	0.0196078	5.03074	1.80297	0.180802	0.445979	0.421391	NTF4	1
GO:0061136	regulation of proteasomal protein catabolic process	2/74	199/18986	0.0100503	2.57857	1.40028	0.181881	0.447547	0.422873	TRIB2/ECSCR	2
GO:0001974	blood vessel remodeling	1/74	52/18986	0.0192308	4.93399	1.77691	0.184004	0.447547	0.422873	TMBIM1	1
GO:0007528	neuromuscular junction development	1/74	52/18986	0.0192308	4.93399	1.77691	0.184004	0.447547	0.422873	KCNJ8	1
GO:0045815	transcription initiation-coupled chromatin remodeling	1/74	52/18986	0.0192308	4.93399	1.77691	0.184004	0.447547	0.422873	TET1	1
GO:0051180	vitamin transport	1/74	52/18986	0.0192308	4.93399	1.77691	0.184004	0.447547	0.422873	SLC23A1	1
GO:0060688	regulation of morphogenesis of a branching structure	1/74	52/18986	0.0192308	4.93399	1.77691	0.184004	0.447547	0.422873	GDNF	1
GO:0098926	postsynaptic signal transduction	1/74	52/18986	0.0192308	4.93399	1.77691	0.184004	0.447547	0.422873	CHRNB1	1
GO:0035094	response to nicotine	1/74	53/18986	0.0188679	4.8409	1.75151	0.187193	0.451704	0.426801	CHRNB1	1
GO:0051403	stress-activated MAPK cascade	1/74	53/18986	0.0188679	4.8409	1.75151	0.187193	0.451704	0.426801	SEMA4C	1
GO:1903170	negative regulation of calcium ion transmembrane transport	1/74	53/18986	0.0188679	4.8409	1.75151	0.187193	0.451704	0.426801	TLR9	1
GO:1990089	response to nerve growth factor	1/74	53/18986	0.0188679	4.8409	1.75151	0.187193	0.451704	0.426801	NTF4	1
GO:0030522	intracellular receptor signaling pathway	3/74	384/18986	0.0078125	2.00443	1.24383	0.188755	0.452221	0.427289	IRF7/KCNJ8/TLR9	3
GO:0007051	spindle organization	2/74	204/18986	0.00980392	2.51537	1.36118	0.188897	0.452221	0.427289	RGS14/KIFC1	2
GO:0001738	morphogenesis of a polarized epithelium	1/74	54/18986	0.0185185	4.75125	1.72674	0.19037	0.452221	0.427289	BRSK2	1
GO:0001836	release of cytochrome c from mitochondria	1/74	54/18986	0.0185185	4.75125	1.72674	0.19037	0.452221	0.427289	TNFSF10	1
GO:0002066	columnar/cuboidal epithelial cell development	1/74	54/18986	0.0185185	4.75125	1.72674	0.19037	0.452221	0.427289	TLR9	1
GO:0007129	homologous chromosome pairing at meiosis	1/74	54/18986	0.0185185	4.75125	1.72674	0.19037	0.452221	0.427289	RNF212	1
GO:0045332	phospholipid translocation	1/74	54/18986	0.0185185	4.75125	1.72674	0.19037	0.452221	0.427289	ATP8B3	1
GO:0046365	monosaccharide catabolic process	1/74	54/18986	0.0185185	4.75125	1.72674	0.19037	0.452221	0.427289	FUT2	1
GO:0045089	positive regulation of innate immune response	3/74	387/18986	0.00775194	1.9889	1.22946	0.191712	0.454526	0.429467	IRF7/KCNJ8/TLR9	3
GO:0002639	positive regulation of immunoglobulin production	1/74	55/18986	0.0181818	4.66486	1.70257	0.193534	0.456188	0.431038	TLR9	1
GO:0045071	negative regulation of viral genome replication	1/74	55/18986	0.0181818	4.66486	1.70257	0.193534	0.456188	0.431038	IFIT1	1
GO:0071320	cellular response to cAMP	1/74	55/18986	0.0181818	4.66486	1.70257	0.193534	0.456188	0.431038	HCN4	1
GO:0006836	neurotransmitter transport	2/74	209/18986	0.00956938	2.45519	1.32322	0.19595	0.456568	0.431396	GDNF/KCNJ8	2
GO:1901605	alpha-amino acid metabolic process	2/74	209/18986	0.00956938	2.45519	1.32322	0.19595	0.456568	0.431396	RIMKLA/NAGS	2
GO:0007187	G protein-coupled receptor signaling pathway, coupled to cyclic nucleotide second messenger	1/74	56/18986	0.0178571	4.58156	1.67897	0.196687	0.456568	0.431396	HTR1D	1
GO:0030865	cortical cytoskeleton organization	1/74	56/18986	0.0178571	4.58156	1.67897	0.196687	0.456568	0.431396	EHD2	1
GO:0086065	cell communication involved in cardiac conduction	1/74	56/18986	0.0178571	4.58156	1.67897	0.196687	0.456568	0.431396	HCN4	1
GO:0141137	positive regulation of gene expression, epigenetic	1/74	56/18986	0.0178571	4.58156	1.67897	0.196687	0.456568	0.431396	TET1	1
GO:1904645	response to amyloid-beta	1/74	56/18986	0.0178571	4.58156	1.67897	0.196687	0.456568	0.431396	CACNB1	1
GO:2000648	positive regulation of stem cell proliferation	1/74	56/18986	0.0178571	4.58156	1.67897	0.196687	0.456568	0.431396	THPO	1
GO:0031098	stress-activated protein kinase signaling cascade	1/74	57/18986	0.0175439	4.50119	1.65593	0.199827	0.461212	0.435785	SEMA4C	1
GO:0061178	regulation of insulin secretion involved in cellular response to glucose stimulus	1/74	57/18986	0.0175439	4.50119	1.65593	0.199827	0.461212	0.435785	BRSK2	1
GO:2000107	negative regulation of leukocyte apoptotic process	1/74	57/18986	0.0175439	4.50119	1.65593	0.199827	0.461212	0.435785	IRF7	1
GO:0050851	antigen receptor-mediated signaling pathway	2/74	212/18986	0.00943396	2.42045	1.30097	0.200199	0.461212	0.435785	CMTM3/BTN2A3P	2
GO:0045732	positive regulation of protein catabolic process	2/74	213/18986	0.00938967	2.40909	1.29364	0.201617	0.461468	0.436026	TRIB2/ECSCR	2
GO:0034204	lipid translocation	1/74	58/18986	0.0172414	4.42358	1.63341	0.202955	0.461468	0.436026	ATP8B3	1
GO:0050805	negative regulation of synaptic transmission	1/74	58/18986	0.0172414	4.42358	1.63341	0.202955	0.461468	0.436026	GRID2IP	1
GO:0061005	cell differentiation involved in kidney development	1/74	58/18986	0.0172414	4.42358	1.63341	0.202955	0.461468	0.436026	GDNF	1
GO:0086009	membrane repolarization	1/74	58/18986	0.0172414	4.42358	1.63341	0.202955	0.461468	0.436026	KCNJ8	1
GO:0170038	proteinogenic amino acid biosynthetic process	1/74	58/18986	0.0172414	4.42358	1.63341	0.202955	0.461468	0.436026	NAGS	1
GO:2001238	positive regulation of extrinsic apoptotic signaling pathway	1/74	58/18986	0.0172414	4.42358	1.63341	0.202955	0.461468	0.436026	TNFSF10	1
GO:0009566	fertilization	2/74	216/18986	0.00925926	2.37563	1.27188	0.205881	0.462524	0.437024	ATP8B3/GLIPR1L1	2
GO:0007632	visual behavior	1/74	59/18986	0.0169492	4.3486	1.61139	0.206071	0.462524	0.437024	RGS14	1
GO:0048008	platelet-derived growth factor receptor signaling pathway	1/74	59/18986	0.0169492	4.3486	1.61139	0.206071	0.462524	0.437024	RGS14	1
GO:0051480	regulation of cytosolic calcium ion concentration	1/74	59/18986	0.0169492	4.3486	1.61139	0.206071	0.462524	0.437024	GRID2IP	1
GO:0061462	protein localization to lysosome	1/74	59/18986	0.0169492	4.3486	1.61139	0.206071	0.462524	0.437024	CACNG8	1
GO:0140374	antiviral innate immune response	1/74	59/18986	0.0169492	4.3486	1.61139	0.206071	0.462524	0.437024	IFIT1	1
GO:0170034	L-amino acid biosynthetic process	1/74	59/18986	0.0169492	4.3486	1.61139	0.206071	0.462524	0.437024	NAGS	1
GO:0001701	in utero embryonic development	3/74	403/18986	0.00744417	1.90993	1.15493	0.20768	0.462687	0.437178	TET1/CMTM3/SALL4	3
GO:2001233	regulation of apoptotic signaling pathway	3/74	403/18986	0.00744417	1.90993	1.15493	0.20768	0.462687	0.437178	TMBIM1/TNFSF10/GDNF	3
GO:0006643	membrane lipid metabolic process	2/74	218/18986	0.00917431	2.35383	1.25758	0.208729	0.462687	0.437178	FUT2/B3GNT5	2
GO:0007131	reciprocal meiotic recombination	1/74	60/18986	0.0166667	4.27613	1.58986	0.209175	0.462687	0.437178	RNF212	1
GO:0010718	positive regulation of epithelial to mesenchymal transition	1/74	60/18986	0.0166667	4.27613	1.58986	0.209175	0.462687	0.437178	GCNT2	1
GO:0038066	p38MAPK cascade	1/74	60/18986	0.0166667	4.27613	1.58986	0.209175	0.462687	0.437178	KCNJ8	1
GO:0097479	synaptic vesicle localization	1/74	60/18986	0.0166667	4.27613	1.58986	0.209175	0.462687	0.437178	BRSK2	1
GO:0140527	reciprocal homologous recombination	1/74	60/18986	0.0166667	4.27613	1.58986	0.209175	0.462687	0.437178	RNF212	1
GO:0045637	regulation of myeloid cell differentiation	2/74	219/18986	0.00913242	2.34308	1.25049	0.210154	0.463174	0.437638	IRF7/THPO	2
GO:0051098	regulation of binding	2/74	219/18986	0.00913242	2.34308	1.25049	0.210154	0.463174	0.437638	IFIT1/EFHB	2
GO:0048167	regulation of synaptic plasticity	2/74	220/18986	0.00909091	2.33243	1.24344	0.211581	0.463647	0.438085	RGS14/GRID2IP	2
GO:1902806	regulation of cell cycle G1/S phase transition	2/74	220/18986	0.00909091	2.33243	1.24344	0.211581	0.463647	0.438085	DPF3/GJC2	2
GO:0001658	branching involved in ureteric bud morphogenesis	1/74	61/18986	0.0163934	4.20603	1.5688	0.212267	0.463647	0.438085	GDNF	1
GO:0001961	positive regulation of cytokine-mediated signaling pathway	1/74	61/18986	0.0163934	4.20603	1.5688	0.212267	0.463647	0.438085	IRF7	1
GO:0098900	regulation of action potential	1/74	61/18986	0.0163934	4.20603	1.5688	0.212267	0.463647	0.438085	HCN4	1
GO:0000768	syncytium formation by plasma membrane fusion	1/74	62/18986	0.016129	4.13819	1.54818	0.215348	0.464613	0.438998	EHD2	1
GO:0045599	negative regulation of fat cell differentiation	1/74	62/18986	0.016129	4.13819	1.54818	0.215348	0.464613	0.438998	TRIB2	1
GO:0086002	cardiac muscle cell action potential involved in contraction	1/74	62/18986	0.016129	4.13819	1.54818	0.215348	0.464613	0.438998	KCNJ8	1
GO:0140253	cell-cell fusion	1/74	62/18986	0.016129	4.13819	1.54818	0.215348	0.464613	0.438998	EHD2	1
GO:0051651	maintenance of location in cell	2/74	224/18986	0.00892857	2.29078	1.2156	0.217297	0.464613	0.438998	PLCD1/TMEM38A	2
GO:0003229	ventricular cardiac muscle tissue development	1/74	63/18986	0.015873	4.0725	1.52799	0.218416	0.464613	0.438998	KCNJ8	1
GO:0007080	mitotic metaphase chromosome alignment	1/74	63/18986	0.015873	4.0725	1.52799	0.218416	0.464613	0.438998	KIFC1	1
GO:0034113	heterotypic cell-cell adhesion	1/74	63/18986	0.015873	4.0725	1.52799	0.218416	0.464613	0.438998	GCNT2	1
GO:0097035	regulation of membrane lipid distribution	1/74	63/18986	0.015873	4.0725	1.52799	0.218416	0.464613	0.438998	ATP8B3	1
GO:0032409	regulation of transporter activity	2/74	225/18986	0.00888889	2.2806	1.20873	0.218729	0.464613	0.438998	CACNG8/TLR9	2
GO:0002833	positive regulation of response to biotic stimulus	3/74	416/18986	0.00721154	1.85025	1.09683	0.220874	0.464613	0.438998	IRF7/KCNJ8/TLR9	3
GO:0009311	oligosaccharide metabolic process	1/74	64/18986	0.015625	4.00887	1.50821	0.221472	0.464613	0.438998	FUT2	1
GO:0051289	protein homotetramerization	1/74	64/18986	0.015625	4.00887	1.50821	0.221472	0.464613	0.438998	KCNJ12	1
GO:2000179	positive regulation of neural precursor cell proliferation	1/74	64/18986	0.015625	4.00887	1.50821	0.221472	0.464613	0.438998	GJC2	1
GO:2000351	regulation of endothelial cell apoptotic process	1/74	64/18986	0.015625	4.00887	1.50821	0.221472	0.464613	0.438998	ECSCR	1
GO:0007163	establishment or maintenance of cell polarity	2/74	227/18986	0.00881057	2.26051	1.1951	0.221594	0.464613	0.438998	BRSK2/KCNJ8	2
GO:0031113	regulation of microtubule polymerization	1/74	65/18986	0.0153846	3.94719	1.48883	0.224517	0.464613	0.438998	INPP5J	1
GO:0031122	cytoplasmic microtubule organization	1/74	65/18986	0.0153846	3.94719	1.48883	0.224517	0.464613	0.438998	CLIP2	1
GO:0032615	interleukin-12 production	1/74	65/18986	0.0153846	3.94719	1.48883	0.224517	0.464613	0.438998	TLR9	1
GO:0032655	regulation of interleukin-12 production	1/74	65/18986	0.0153846	3.94719	1.48883	0.224517	0.464613	0.438998	TLR9	1
GO:0032757	positive regulation of interleukin-8 production	1/74	65/18986	0.0153846	3.94719	1.48883	0.224517	0.464613	0.438998	TLR9	1
GO:0048524	positive regulation of viral process	1/74	65/18986	0.0153846	3.94719	1.48883	0.224517	0.464613	0.438998	IFIT1	1
GO:0051937	catecholamine transport	1/74	65/18986	0.0153846	3.94719	1.48883	0.224517	0.464613	0.438998	GDNF	1
GO:0051965	positive regulation of synapse assembly	1/74	65/18986	0.0153846	3.94719	1.48883	0.224517	0.464613	0.438998	AMIGO2	1
GO:0072666	establishment of protein localization to vacuole	1/74	65/18986	0.0153846	3.94719	1.48883	0.224517	0.464613	0.438998	CACNG8	1
GO:0097192	extrinsic apoptotic signaling pathway in absence of ligand	1/74	65/18986	0.0153846	3.94719	1.48883	0.224517	0.464613	0.438998	GDNF	1
GO:1901607	alpha-amino acid biosynthetic process	1/74	65/18986	0.0153846	3.94719	1.48883	0.224517	0.464613	0.438998	NAGS	1
GO:1905330	regulation of morphogenesis of an epithelium	1/74	65/18986	0.0153846	3.94719	1.48883	0.224517	0.464613	0.438998	GDNF	1
GO:0002440	production of molecular mediator of immune response	2/74	230/18986	0.00869565	2.23102	1.17493	0.225899	0.464613	0.438998	GPRC5B/TLR9	2
GO:0002931	response to ischemia	1/74	66/18986	0.0151515	3.88739	1.46984	0.22755	0.464613	0.438998	KCNJ8	1
GO:0006767	water-soluble vitamin metabolic process	1/74	66/18986	0.0151515	3.88739	1.46984	0.22755	0.464613	0.438998	SLC23A1	1
GO:0006949	syncytium formation	1/74	66/18986	0.0151515	3.88739	1.46984	0.22755	0.464613	0.438998	EHD2	1
GO:0010812	negative regulation of cell-substrate adhesion	1/74	66/18986	0.0151515	3.88739	1.46984	0.22755	0.464613	0.438998	GCNT2	1
GO:0045744	negative regulation of G protein-coupled receptor signaling pathway	1/74	66/18986	0.0151515	3.88739	1.46984	0.22755	0.464613	0.438998	RGS14	1
GO:0050688	regulation of defense response to virus	1/74	66/18986	0.0151515	3.88739	1.46984	0.22755	0.464613	0.438998	TSPAN32	1
GO:0051341	regulation of oxidoreductase activity	1/74	66/18986	0.0151515	3.88739	1.46984	0.22755	0.464613	0.438998	GDNF	1
GO:0070059	intrinsic apoptotic signaling pathway in response to endoplasmic reticulum stress	1/74	66/18986	0.0151515	3.88739	1.46984	0.22755	0.464613	0.438998	BRSK2	1
GO:0070192	chromosome organization involved in meiotic cell cycle	1/74	66/18986	0.0151515	3.88739	1.46984	0.22755	0.464613	0.438998	RNF212	1
GO:1901224	positive regulation of non-canonical NF-kappaB signal transduction	1/74	66/18986	0.0151515	3.88739	1.46984	0.22755	0.464613	0.438998	TLR9	1
GO:0030219	megakaryocyte differentiation	1/74	67/18986	0.0149254	3.82937	1.45121	0.230571	0.466379	0.440667	THPO	1
GO:0030888	regulation of B cell proliferation	1/74	67/18986	0.0149254	3.82937	1.45121	0.230571	0.466379	0.440667	TLR9	1
GO:0035773	insulin secretion involved in cellular response to glucose stimulus	1/74	67/18986	0.0149254	3.82937	1.45121	0.230571	0.466379	0.440667	BRSK2	1
GO:0038034	signal transduction in absence of ligand	1/74	67/18986	0.0149254	3.82937	1.45121	0.230571	0.466379	0.440667	GDNF	1
GO:0045859	regulation of protein kinase activity	3/74	427/18986	0.00702576	1.80258	1.04925	0.232172	0.466379	0.440667	RGS14/GPRC5B/TRIB2	3
GO:0000819	sister chromatid segregation	2/74	235/18986	0.00851064	2.18355	1.14199	0.233087	0.466379	0.440667	DPF3/KIFC1	2
GO:0016925	protein sumoylation	1/74	68/18986	0.0147059	3.77305	1.43294	0.233581	0.466379	0.440667	RNF212	1
GO:0035019	somatic stem cell population maintenance	1/74	68/18986	0.0147059	3.77305	1.43294	0.233581	0.466379	0.440667	SALL4	1
GO:0035825	homologous recombination	1/74	68/18986	0.0147059	3.77305	1.43294	0.233581	0.466379	0.440667	RNF212	1
GO:0042058	regulation of epidermal growth factor receptor signaling pathway	1/74	68/18986	0.0147059	3.77305	1.43294	0.233581	0.466379	0.440667	AQP5-AS1	1
GO:0045143	homologous chromosome segregation	1/74	68/18986	0.0147059	3.77305	1.43294	0.233581	0.466379	0.440667	RNF212	1
GO:0060675	ureteric bud morphogenesis	1/74	68/18986	0.0147059	3.77305	1.43294	0.233581	0.466379	0.440667	GDNF	1
GO:0060760	positive regulation of response to cytokine stimulus	1/74	68/18986	0.0147059	3.77305	1.43294	0.233581	0.466379	0.440667	IRF7	1
GO:0001933	negative regulation of protein phosphorylation	2/74	236/18986	0.00847458	2.1743	1.1355	0.234526	0.466379	0.440667	RGS14/TRIB2	2
GO:0007411	axon guidance	2/74	236/18986	0.00847458	2.1743	1.1355	0.234526	0.466379	0.440667	SEMA4C/GDNF	2
GO:0008406	gonad development	2/74	236/18986	0.00847458	2.1743	1.1355	0.234526	0.466379	0.440667	TNFSF10/TLR9	2
GO:0097485	neuron projection guidance	2/74	237/18986	0.00843882	2.16513	1.12904	0.235966	0.468173	0.442361	SEMA4C/GDNF	2
GO:0035567	non-canonical Wnt signaling pathway	1/74	69/18986	0.0144928	3.71837	1.41501	0.236579	0.468173	0.442361	ARHGEF19	1
GO:0072171	mesonephric tubule morphogenesis	1/74	69/18986	0.0144928	3.71837	1.41501	0.236579	0.468173	0.442361	GDNF	1
GO:1903050	regulation of proteolysis involved in protein catabolic process	2/74	238/18986	0.00840336	2.15603	1.12262	0.237407	0.469052	0.443192	TRIB2/ECSCR	2
GO:1903706	regulation of hemopoiesis	3/74	433/18986	0.00692841	1.7776	1.02388	0.238381	0.46932	0.443446	IRF7/THPO/TLR9	3
GO:0032413	negative regulation of ion transmembrane transporter activity	1/74	70/18986	0.0142857	3.66525	1.39741	0.239565	0.46932	0.443446	TLR9	1
GO:0050854	regulation of antigen receptor-mediated signaling pathway	1/74	70/18986	0.0142857	3.66525	1.39741	0.239565	0.46932	0.443446	CMTM3	1
GO:0072577	endothelial cell apoptotic process	1/74	70/18986	0.0142857	3.66525	1.39741	0.239565	0.46932	0.443446	ECSCR	1
GO:1901019	regulation of calcium ion transmembrane transporter activity	1/74	70/18986	0.0142857	3.66525	1.39741	0.239565	0.46932	0.443446	TLR9	1
GO:0050670	regulation of lymphocyte proliferation	2/74	240/18986	0.00833333	2.13806	1.10986	0.24029	0.46932	0.443446	TSPAN32/TLR9	2
GO:0001667	ameboidal-type cell migration	2/74	241/18986	0.00829876	2.12919	1.10353	0.241732	0.46932	0.443446	SEMA4C/GDNF	2
GO:0045137	development of primary sexual characteristics	2/74	241/18986	0.00829876	2.12919	1.10353	0.241732	0.46932	0.443446	TNFSF10/TLR9	2
GO:0006024	glycosaminoglycan biosynthetic process	1/74	71/18986	0.0140845	3.61363	1.38014	0.24254	0.46932	0.443446	GCNT2	1
GO:0008333	endosome to lysosome transport	1/74	71/18986	0.0140845	3.61363	1.38014	0.24254	0.46932	0.443446	CACNG8	1
GO:0048255	mRNA stabilization	1/74	71/18986	0.0140845	3.61363	1.38014	0.24254	0.46932	0.443446	GDNF	1
GO:0051926	negative regulation of calcium ion transport	1/74	71/18986	0.0140845	3.61363	1.38014	0.24254	0.46932	0.443446	TLR9	1
GO:0062208	positive regulation of pattern recognition receptor signaling pathway	1/74	71/18986	0.0140845	3.61363	1.38014	0.24254	0.46932	0.443446	TLR9	1
GO:0050918	positive chemotaxis	1/74	72/18986	0.0138889	3.56344	1.36317	0.245503	0.474303	0.448154	GDNF	1
GO:2001234	negative regulation of apoptotic signaling pathway	2/74	244/18986	0.00819672	2.10301	1.08473	0.246061	0.47463	0.448463	TMBIM1/GDNF	2
GO:0032944	regulation of mononuclear cell proliferation	2/74	245/18986	0.00816327	2.09443	1.07852	0.247505	0.475161	0.448965	TSPAN32/TLR9	2
GO:0009988	cell-cell recognition	1/74	73/18986	0.0136986	3.51462	1.3465	0.248455	0.475161	0.448965	ATP8B3	1
GO:0015800	acidic amino acid transport	1/74	73/18986	0.0136986	3.51462	1.3465	0.248455	0.475161	0.448965	KCNJ8	1
GO:0032722	positive regulation of chemokine production	1/74	73/18986	0.0136986	3.51462	1.3465	0.248455	0.475161	0.448965	TLR9	1
GO:0051898	negative regulation of phosphatidylinositol 3-kinase/protein kinase B signal transduction	1/74	73/18986	0.0136986	3.51462	1.3465	0.248455	0.475161	0.448965	PIK3IP1	1
GO:0050769	positive regulation of neurogenesis	2/74	247/18986	0.00809717	2.07747	1.06619	0.250394	0.475161	0.448965	RGS14/GJC2	2
GO:0003281	ventricular septum development	1/74	74/18986	0.0135135	3.46713	1.33012	0.251396	0.475161	0.448965	SALL4	1
GO:0008652	amino acid biosynthetic process	1/74	74/18986	0.0135135	3.46713	1.33012	0.251396	0.475161	0.448965	NAGS	1
GO:0014015	positive regulation of gliogenesis	1/74	74/18986	0.0135135	3.46713	1.33012	0.251396	0.475161	0.448965	GJC2	1
GO:0030858	positive regulation of epithelial cell differentiation	1/74	74/18986	0.0135135	3.46713	1.33012	0.251396	0.475161	0.448965	GDNF	1
GO:0042130	negative regulation of T cell proliferation	1/74	74/18986	0.0135135	3.46713	1.33012	0.251396	0.475161	0.448965	TSPAN32	1
GO:0042490	mechanoreceptor differentiation	1/74	74/18986	0.0135135	3.46713	1.33012	0.251396	0.475161	0.448965	NTF4	1
GO:2000036	regulation of stem cell population maintenance	1/74	74/18986	0.0135135	3.46713	1.33012	0.251396	0.475161	0.448965	TET1	1
GO:0006023	aminoglycan biosynthetic process	1/74	75/18986	0.0133333	3.4209	1.31402	0.254325	0.478773	0.452377	GCNT2	1
GO:1901184	regulation of ERBB signaling pathway	1/74	75/18986	0.0133333	3.4209	1.31402	0.254325	0.478773	0.452377	AQP5-AS1	1
GO:0007179	transforming growth factor beta receptor signaling pathway	2/74	250/18986	0.008	2.05254	1.04791	0.254729	0.478773	0.452377	TET1/GCNT2	2
GO:0006814	sodium ion transport	2/74	251/18986	0.00796813	2.04436	1.04187	0.256174	0.478773	0.452377	HCN4/SLC23A1	2
GO:0045444	fat cell differentiation	2/74	251/18986	0.00796813	2.04436	1.04187	0.256174	0.478773	0.452377	KCNJ8/TRIB2	2
GO:0048863	stem cell differentiation	2/74	251/18986	0.00796813	2.04436	1.04187	0.256174	0.478773	0.452377	SEMA4C/GDNF	2
GO:0045661	regulation of myoblast differentiation	1/74	76/18986	0.0131579	3.37589	1.29819	0.257243	0.478773	0.452377	DPF3	1
GO:0050795	regulation of behavior	1/74	76/18986	0.0131579	3.37589	1.29819	0.257243	0.478773	0.452377	HTR1D	1
GO:0090307	mitotic spindle assembly	1/74	76/18986	0.0131579	3.37589	1.29819	0.257243	0.478773	0.452377	KIFC1	1
GO:0097120	receptor localization to synapse	1/74	76/18986	0.0131579	3.37589	1.29819	0.257243	0.478773	0.452377	CACNG8	1
GO:0048738	cardiac muscle tissue development	2/74	252/18986	0.00793651	2.03625	1.03586	0.25762	0.478773	0.452377	HCN4/KCNJ8	2
GO:0016032	viral process	3/74	452/18986	0.00663717	1.70288	0.946062	0.258229	0.479099	0.452685	RAB43/IFIT1/IRF7	3
GO:0002637	regulation of immunoglobulin production	1/74	77/18986	0.012987	3.33205	1.28263	0.260149	0.479099	0.452685	TLR9	1
GO:0015844	monoamine transport	1/74	77/18986	0.012987	3.33205	1.28263	0.260149	0.479099	0.452685	GDNF	1
GO:0032729	positive regulation of type II interferon production	1/74	77/18986	0.012987	3.33205	1.28263	0.260149	0.479099	0.452685	TLR9	1
GO:0051966	regulation of synaptic transmission, glutamatergic	1/74	77/18986	0.012987	3.33205	1.28263	0.260149	0.479099	0.452685	CACNG8	1
GO:0070527	platelet aggregation	1/74	77/18986	0.012987	3.33205	1.28263	0.260149	0.479099	0.452685	TSPAN32	1
GO:0072078	nephron tubule morphogenesis	1/74	78/18986	0.0128205	3.28933	1.26732	0.263045	0.482184	0.4556	GDNF	1
GO:0000082	G1/S transition of mitotic cell cycle	2/74	256/18986	0.0078125	2.00443	1.0121	0.263404	0.482184	0.4556	DPF3/GJC2	2
GO:0042326	negative regulation of phosphorylation	2/74	256/18986	0.0078125	2.00443	1.0121	0.263404	0.482184	0.4556	RGS14/TRIB2	2
GO:0045930	negative regulation of mitotic cell cycle	2/74	256/18986	0.0078125	2.00443	1.0121	0.263404	0.482184	0.4556	BRSK2/GJC2	2
GO:0006869	lipid transport	3/74	459/18986	0.00653595	1.67691	0.918308	0.265601	0.484082	0.457393	ATP8B3/KCNJ8/RBP5	3
GO:0007409	axonogenesis	3/74	459/18986	0.00653595	1.67691	0.918308	0.265601	0.484082	0.457393	SEMA4C/BRSK2/GDNF	3
GO:0050853	B cell receptor signaling pathway	1/74	79/18986	0.0126582	3.24769	1.25225	0.265929	0.484082	0.457393	CMTM3	1
GO:0010720	positive regulation of cell development	3/74	460/18986	0.00652174	1.67327	0.914382	0.266657	0.484082	0.457393	RGS14/GJC2/TLR9	3
GO:0043549	regulation of kinase activity	3/74	460/18986	0.00652174	1.67327	0.914382	0.266657	0.484082	0.457393	RGS14/GPRC5B/TRIB2	3
GO:0015711	organic anion transport	3/74	462/18986	0.00649351	1.66602	0.906558	0.26877	0.484082	0.457393	SLC23A1/KCNJ8/RBP5	3
GO:0032272	negative regulation of protein polymerization	1/74	80/18986	0.0125	3.20709	1.23742	0.268802	0.484082	0.457393	INPP5J	1
GO:0032436	positive regulation of proteasomal ubiquitin-dependent protein catabolic process	1/74	80/18986	0.0125	3.20709	1.23742	0.268802	0.484082	0.457393	TRIB2	1
GO:0043489	RNA stabilization	1/74	80/18986	0.0125	3.20709	1.23742	0.268802	0.484082	0.457393	GDNF	1
GO:0072088	nephron epithelium morphogenesis	1/74	80/18986	0.0125	3.20709	1.23742	0.268802	0.484082	0.457393	GDNF	1
GO:1902373	negative regulation of mRNA catabolic process	1/74	80/18986	0.0125	3.20709	1.23742	0.268802	0.484082	0.457393	GDNF	1
GO:0051960	regulation of nervous system development	3/74	463/18986	0.00647948	1.66242	0.902659	0.269827	0.485212	0.458461	AMIGO2/RGS14/GJC2	3
GO:2000027	regulation of animal organ morphogenesis	1/74	81/18986	0.0123457	3.1675	1.22283	0.271664	0.487117	0.460261	GDNF	1
GO:0005996	monosaccharide metabolic process	2/74	262/18986	0.00763359	1.95853	0.97726	0.272083	0.487117	0.460261	FUT2/SLC23A1	2
GO:0071900	regulation of protein serine/threonine kinase activity	2/74	262/18986	0.00763359	1.95853	0.97726	0.272083	0.487117	0.460261	RGS14/TRIB2	2
GO:0042391	regulation of membrane potential	3/74	466/18986	0.00643777	1.65172	0.89102	0.273002	0.488045	0.461139	CHRNB1/HCN4/KCNJ8	3
GO:0044772	mitotic cell cycle phase transition	3/74	467/18986	0.00642398	1.64819	0.887159	0.274061	0.488605	0.461667	DPF3/BRSK2/GJC2	3
GO:0061333	renal tubule morphogenesis	1/74	82/18986	0.0121951	3.12887	1.20846	0.274515	0.488605	0.461667	GDNF	1
GO:0072028	nephron morphogenesis	1/74	82/18986	0.0121951	3.12887	1.20846	0.274515	0.488605	0.461667	GDNF	1
GO:0045088	regulation of innate immune response	3/74	470/18986	0.00638298	1.63767	0.87563	0.277241	0.490087	0.463068	IRF7/KCNJ8/TLR9	3
GO:0006289	nucleotide-excision repair	1/74	83/18986	0.0120482	3.09118	1.19431	0.277355	0.490087	0.463068	DPF3	1
GO:0051279	regulation of release of sequestered calcium ion into cytosol	1/74	83/18986	0.0120482	3.09118	1.19431	0.277355	0.490087	0.463068	TMEM38A	1
GO:0051952	regulation of amine transport	1/74	83/18986	0.0120482	3.09118	1.19431	0.277355	0.490087	0.463068	GDNF	1
GO:0071901	negative regulation of protein serine/threonine kinase activity	1/74	83/18986	0.0120482	3.09118	1.19431	0.277355	0.490087	0.463068	RGS14	1
GO:0051149	positive regulation of muscle cell differentiation	1/74	84/18986	0.0119048	3.05438	1.18037	0.280184	0.493361	0.466161	MAMSTR	1
GO:2000736	regulation of stem cell differentiation	1/74	84/18986	0.0119048	3.05438	1.18037	0.280184	0.493361	0.466161	GDNF	1
GO:1901888	regulation of cell junction assembly	2/74	268/18986	0.00746269	1.91468	0.943324	0.280761	0.493361	0.466161	SEMA4C/AMIGO2	2
GO:0002720	positive regulation of cytokine production involved in immune response	1/74	85/18986	0.0117647	3.01844	1.16664	0.283002	0.493361	0.466161	GPRC5B	1
GO:0045069	regulation of viral genome replication	1/74	85/18986	0.0117647	3.01844	1.16664	0.283002	0.493361	0.466161	IFIT1	1
GO:0060337	type I interferon-mediated signaling pathway	1/74	85/18986	0.0117647	3.01844	1.16664	0.283002	0.493361	0.466161	IRF7	1
GO:1904427	positive regulation of calcium ion transmembrane transport	1/74	85/18986	0.0117647	3.01844	1.16664	0.283002	0.493361	0.466161	GJC2	1
GO:0001894	tissue homeostasis	2/74	270/18986	0.00740741	1.9005	0.932206	0.283652	0.493361	0.466161	GCNT2/TLR9	2
GO:0009636	response to toxic substance	2/74	270/18986	0.00740741	1.9005	0.932206	0.283652	0.493361	0.466161	GJC2/SLC23A1	2
GO:0060249	anatomical structure homeostasis	2/74	270/18986	0.00740741	1.9005	0.932206	0.283652	0.493361	0.466161	GCNT2/TLR9	2
GO:0070663	regulation of leukocyte proliferation	2/74	270/18986	0.00740741	1.9005	0.932206	0.283652	0.493361	0.466161	TSPAN32/TLR9	2
GO:0007193	adenylate cyclase-inhibiting G protein-coupled receptor signaling pathway	1/74	86/18986	0.0116279	2.98334	1.1531	0.285809	0.495318	0.46801	HTR1D	1
GO:0050871	positive regulation of B cell activation	1/74	86/18986	0.0116279	2.98334	1.1531	0.285809	0.495318	0.46801	TLR9	1
GO:0002699	positive regulation of immune effector process	2/74	272/18986	0.00735294	1.88653	0.921181	0.286543	0.495318	0.46801	GPRC5B/TLR9	2
GO:0032386	regulation of intracellular transport	2/74	272/18986	0.00735294	1.88653	0.921181	0.286543	0.495318	0.46801	EHD2/BRSK2	2
GO:1901987	regulation of cell cycle phase transition	3/74	479/18986	0.00626305	1.60689	0.841522	0.286806	0.495318	0.46801	DPF3/BRSK2/GJC2	3
GO:0007422	peripheral nervous system development	1/74	87/18986	0.0114943	2.94905	1.13977	0.288605	0.49702	0.469618	GDNF	1
GO:0099068	postsynapse assembly	1/74	87/18986	0.0114943	2.94905	1.13977	0.288605	0.49702	0.469618	SEMA4C	1
GO:0010232	vascular transport	1/74	88/18986	0.0113636	2.91554	1.12662	0.291391	0.498303	0.47083	KCNJ8	1
GO:0034103	regulation of tissue remodeling	1/74	88/18986	0.0113636	2.91554	1.12662	0.291391	0.498303	0.47083	TMBIM1	1
GO:0042310	vasoconstriction	1/74	88/18986	0.0113636	2.91554	1.12662	0.291391	0.498303	0.47083	HTR1D	1
GO:0072665	protein localization to vacuole	1/74	88/18986	0.0113636	2.91554	1.12662	0.291391	0.498303	0.47083	CACNG8	1
GO:0150104	transport across blood-brain barrier	1/74	88/18986	0.0113636	2.91554	1.12662	0.291391	0.498303	0.47083	KCNJ8	1
GO:0003018	vascular process in circulatory system	2/74	276/18986	0.00724638	1.85919	0.899408	0.292321	0.498496	0.471013	HTR1D/KCNJ8	2
GO:0032868	response to insulin	2/74	276/18986	0.00724638	1.85919	0.899408	0.292321	0.498496	0.471013	TNFSF10/KCNJ8	2
GO:0034976	response to endoplasmic reticulum stress	2/74	277/18986	0.00722022	1.85247	0.894021	0.293764	0.500245	0.472666	BRSK2/KCNJ8	2
GO:2000134	negative regulation of G1/S transition of mitotic cell cycle	1/74	89/18986	0.011236	2.88278	1.11366	0.294166	0.500245	0.472666	GJC2	1
GO:0008306	associative learning	1/74	90/18986	0.0111111	2.85075	1.10087	0.29693	0.502148	0.474464	RGS14	1
GO:0032456	endocytic recycling	1/74	90/18986	0.0111111	2.85075	1.10087	0.29693	0.502148	0.474464	EHD2	1
GO:0050672	negative regulation of lymphocyte proliferation	1/74	90/18986	0.0111111	2.85075	1.10087	0.29693	0.502148	0.474464	TSPAN32	1
GO:0061515	myeloid cell development	1/74	90/18986	0.0111111	2.85075	1.10087	0.29693	0.502148	0.474464	THPO	1
GO:0098742	cell-cell adhesion via plasma-membrane adhesion molecules	2/74	280/18986	0.00714286	1.83263	0.877992	0.298093	0.503419	0.475665	AMIGO2/ELFN2	2
GO:0010469	regulation of signaling receptor activity	1/74	91/18986	0.010989	2.81942	1.08826	0.299683	0.504707	0.476882	CACNG8	1
GO:0051591	response to cAMP	1/74	91/18986	0.010989	2.81942	1.08826	0.299683	0.504707	0.476882	HCN4	1
GO:0023061	signal release	3/74	493/18986	0.00608519	1.56126	0.789839	0.301739	0.505838	0.47795	BRSK2/GDNF/KCNJ8	3
GO:0001656	metanephros development	1/74	92/18986	0.0108696	2.78878	1.07582	0.302426	0.505838	0.47795	GDNF	1
GO:0032945	negative regulation of mononuclear cell proliferation	1/74	92/18986	0.0108696	2.78878	1.07582	0.302426	0.505838	0.47795	TSPAN32	1
GO:0042100	B cell proliferation	1/74	92/18986	0.0108696	2.78878	1.07582	0.302426	0.505838	0.47795	TLR9	1
GO:1902369	negative regulation of RNA catabolic process	1/74	92/18986	0.0108696	2.78878	1.07582	0.302426	0.505838	0.47795	GDNF	1
GO:0030071	regulation of mitotic metaphase/anaphase transition	1/74	93/18986	0.0107527	2.75879	1.06355	0.305158	0.507626	0.47964	DPF3	1
GO:0032410	negative regulation of transporter activity	1/74	93/18986	0.0107527	2.75879	1.06355	0.305158	0.507626	0.47964	TLR9	1
GO:0070098	chemokine-mediated signaling pathway	1/74	93/18986	0.0107527	2.75879	1.06355	0.305158	0.507626	0.47964	THPO	1
GO:2000106	regulation of leukocyte apoptotic process	1/74	93/18986	0.0107527	2.75879	1.06355	0.305158	0.507626	0.47964	IRF7	1
GO:2000781	positive regulation of double-strand break repair	1/74	94/18986	0.0106383	2.72944	1.05144	0.307879	0.510566	0.482418	DPF3	1
GO:0044843	cell cycle G1/S phase transition	2/74	287/18986	0.00696864	1.78793	0.841338	0.308179	0.510566	0.482418	DPF3/GJC2	2
GO:1901988	negative regulation of cell cycle phase transition	2/74	287/18986	0.00696864	1.78793	0.841338	0.308179	0.510566	0.482418	BRSK2/GJC2	2
GO:0006520	amino acid metabolic process	2/74	289/18986	0.00692042	1.77555	0.831051	0.311057	0.514417	0.486056	RIMKLA/NAGS	2
GO:0015837	amine transport	1/74	96/18986	0.0104167	2.67258	1.02768	0.313291	0.514417	0.486056	GDNF	1
GO:0045666	positive regulation of neuron differentiation	1/74	96/18986	0.0104167	2.67258	1.02768	0.313291	0.514417	0.486056	GPRC5B	1
GO:0072091	regulation of stem cell proliferation	1/74	96/18986	0.0104167	2.67258	1.02768	0.313291	0.514417	0.486056	THPO	1
GO:1902099	regulation of metaphase/anaphase transition of cell cycle	1/74	96/18986	0.0104167	2.67258	1.02768	0.313291	0.514417	0.486056	DPF3	1
GO:0007548	sex differentiation	2/74	292/18986	0.00684932	1.75731	0.81577	0.315368	0.514417	0.486056	TNFSF10/TLR9	2
GO:0007091	metaphase/anaphase transition of mitotic cell cycle	1/74	97/18986	0.0103093	2.64503	1.01603	0.315981	0.514417	0.486056	DPF3	1
GO:0033555	multicellular organismal response to stress	1/74	97/18986	0.0103093	2.64503	1.01603	0.315981	0.514417	0.486056	LPAR5	1
GO:0045132	meiotic chromosome segregation	1/74	97/18986	0.0103093	2.64503	1.01603	0.315981	0.514417	0.486056	RNF212	1
GO:0046330	positive regulation of JNK cascade	1/74	97/18986	0.0103093	2.64503	1.01603	0.315981	0.514417	0.486056	TLR9	1
GO:0051153	regulation of striated muscle cell differentiation	1/74	97/18986	0.0103093	2.64503	1.01603	0.315981	0.514417	0.486056	MAMSTR	1
GO:0061337	cardiac conduction	1/74	97/18986	0.0103093	2.64503	1.01603	0.315981	0.514417	0.486056	HCN4	1
GO:1904063	negative regulation of cation transmembrane transport	1/74	97/18986	0.0103093	2.64503	1.01603	0.315981	0.514417	0.486056	TLR9	1
GO:0006650	glycerophospholipid metabolic process	2/74	294/18986	0.00680272	1.74536	0.805681	0.31824	0.514422	0.486061	INPP5J/PLCD1	2
GO:0071346	cellular response to type II interferon	1/74	98/18986	0.0102041	2.61804	1.00453	0.318661	0.514422	0.486061	RAB43	1
GO:1902807	negative regulation of cell cycle G1/S phase transition	1/74	98/18986	0.0102041	2.61804	1.00453	0.318661	0.514422	0.486061	GJC2	1
GO:0072659	protein localization to plasma membrane	2/74	295/18986	0.00677966	1.73944	0.800665	0.319674	0.514422	0.486061	TMBIM1/EHD2	2
GO:0006576	biogenic amine metabolic process	1/74	99/18986	0.010101	2.59159	0.993162	0.32133	0.514422	0.486061	PAOX	1
GO:0043280	positive regulation of cysteine-type endopeptidase activity involved in apoptotic process	1/74	99/18986	0.010101	2.59159	0.993162	0.32133	0.514422	0.486061	TNFSF10	1
GO:0048525	negative regulation of viral process	1/74	99/18986	0.010101	2.59159	0.993162	0.32133	0.514422	0.486061	IFIT1	1
GO:0050848	regulation of calcium-mediated signaling	1/74	99/18986	0.010101	2.59159	0.993162	0.32133	0.514422	0.486061	EFHB	1
GO:0051262	protein tetramerization	1/74	99/18986	0.010101	2.59159	0.993162	0.32133	0.514422	0.486061	KCNJ12	1
GO:0051588	regulation of neurotransmitter transport	1/74	99/18986	0.010101	2.59159	0.993162	0.32133	0.514422	0.486061	GDNF	1
GO:0060993	kidney morphogenesis	1/74	99/18986	0.010101	2.59159	0.993162	0.32133	0.514422	0.486061	GDNF	1
GO:0070664	negative regulation of leukocyte proliferation	1/74	99/18986	0.010101	2.59159	0.993162	0.32133	0.514422	0.486061	TSPAN32	1
GO:0046651	lymphocyte proliferation	2/74	297/18986	0.00673401	1.72773	0.790691	0.322542	0.514422	0.486061	TSPAN32/TLR9	2
GO:0007029	endoplasmic reticulum organization	1/74	100/18986	0.01	2.56568	0.981938	0.323989	0.514422	0.486061	TMEM38A	1
GO:0021510	spinal cord development	1/74	100/18986	0.01	2.56568	0.981938	0.323989	0.514422	0.486061	GDNF	1
GO:0021675	nerve development	1/74	100/18986	0.01	2.56568	0.981938	0.323989	0.514422	0.486061	NTF4	1
GO:0031110	regulation of microtubule polymerization or depolymerization	1/74	100/18986	0.01	2.56568	0.981938	0.323989	0.514422	0.486061	INPP5J	1
GO:0043648	dicarboxylic acid metabolic process	1/74	100/18986	0.01	2.56568	0.981938	0.323989	0.514422	0.486061	NAGS	1
GO:0044784	metaphase/anaphase transition of cell cycle	1/74	100/18986	0.01	2.56568	0.981938	0.323989	0.514422	0.486061	DPF3	1
GO:0034109	homotypic cell-cell adhesion	1/74	101/18986	0.00990099	2.54027	0.97085	0.326638	0.516613	0.488131	TSPAN32	1
GO:0046785	microtubule polymerization	1/74	101/18986	0.00990099	2.54027	0.97085	0.326638	0.516613	0.488131	INPP5J	1
GO:0072080	nephron tubule development	1/74	101/18986	0.00990099	2.54027	0.97085	0.326638	0.516613	0.488131	GDNF	1
GO:0015807	L-amino acid transport	1/74	102/18986	0.00980392	2.51537	0.959895	0.329276	0.51877	0.490169	KCNJ8	1
GO:1990868	response to chemokine	1/74	102/18986	0.00980392	2.51537	0.959895	0.329276	0.51877	0.490169	THPO	1
GO:1990869	cellular response to chemokine	1/74	102/18986	0.00980392	2.51537	0.959895	0.329276	0.51877	0.490169	THPO	1
GO:0032755	positive regulation of interleukin-6 production	1/74	103/18986	0.00970874	2.49095	0.949069	0.331905	0.518893	0.490286	TLR9	1
GO:0034766	negative regulation of monoatomic ion transmembrane transport	1/74	103/18986	0.00970874	2.49095	0.949069	0.331905	0.518893	0.490286	TLR9	1
GO:0043279	response to alkaloid	1/74	103/18986	0.00970874	2.49095	0.949069	0.331905	0.518893	0.490286	TMEM38A	1
GO:0051310	metaphase chromosome alignment	1/74	103/18986	0.00970874	2.49095	0.949069	0.331905	0.518893	0.490286	KIFC1	1
GO:1903312	negative regulation of mRNA metabolic process	1/74	103/18986	0.00970874	2.49095	0.949069	0.331905	0.518893	0.490286	GDNF	1
GO:2000177	regulation of neural precursor cell proliferation	1/74	103/18986	0.00970874	2.49095	0.949069	0.331905	0.518893	0.490286	GJC2	1
GO:0032943	mononuclear cell proliferation	2/74	305/18986	0.00655738	1.68241	0.751533	0.333982	0.519744	0.491089	TSPAN32/TLR9	2
GO:0010563	negative regulation of phosphorus metabolic process	2/74	306/18986	0.00653595	1.67691	0.746719	0.335409	0.519744	0.491089	RGS14/TRIB2	2
GO:0045936	negative regulation of phosphate metabolic process	2/74	306/18986	0.00653595	1.67691	0.746719	0.335409	0.519744	0.491089	RGS14/TRIB2	2
GO:0071560	cellular response to transforming growth factor beta stimulus	2/74	306/18986	0.00653595	1.67691	0.746719	0.335409	0.519744	0.491089	TET1/GCNT2	2
GO:0015914	phospholipid transport	1/74	105/18986	0.00952381	2.4435	0.927794	0.337131	0.519744	0.491089	ATP8B3	1
GO:0032602	chemokine production	1/74	105/18986	0.00952381	2.4435	0.927794	0.337131	0.519744	0.491089	TLR9	1
GO:0032637	interleukin-8 production	1/74	105/18986	0.00952381	2.4435	0.927794	0.337131	0.519744	0.491089	TLR9	1
GO:0032642	regulation of chemokine production	1/74	105/18986	0.00952381	2.4435	0.927794	0.337131	0.519744	0.491089	TLR9	1
GO:0032677	regulation of interleukin-8 production	1/74	105/18986	0.00952381	2.4435	0.927794	0.337131	0.519744	0.491089	TLR9	1
GO:0061326	renal tubule development	1/74	105/18986	0.00952381	2.4435	0.927794	0.337131	0.519744	0.491089	GDNF	1
GO:2000060	positive regulation of ubiquitin-dependent protein catabolic process	1/74	105/18986	0.00952381	2.4435	0.927794	0.337131	0.519744	0.491089	TRIB2	1
GO:0048608	reproductive structure development	2/74	309/18986	0.00647249	1.66063	0.732382	0.339683	0.521772	0.493006	TNFSF10/TLR9	2
GO:0006835	dicarboxylic acid transport	1/74	106/18986	0.00943396	2.42045	0.917339	0.339729	0.521772	0.493006	KCNJ8	1
GO:1901222	regulation of non-canonical NF-kappaB signal transduction	1/74	106/18986	0.00943396	2.42045	0.917339	0.339729	0.521772	0.493006	TLR9	1
GO:0002377	immunoglobulin production	1/74	107/18986	0.00934579	2.39783	0.907002	0.342317	0.523771	0.494894	TLR9	1
GO:0019751	polyol metabolic process	1/74	107/18986	0.00934579	2.39783	0.907002	0.342317	0.523771	0.494894	INPP5J	1
GO:0045639	positive regulation of myeloid cell differentiation	1/74	107/18986	0.00934579	2.39783	0.907002	0.342317	0.523771	0.494894	THPO	1
GO:0050807	regulation of synapse organization	2/74	312/18986	0.00641026	1.64466	0.718198	0.34395	0.524498	0.495582	SEMA4C/AMIGO2	2
GO:0008637	apoptotic mitochondrial changes	1/74	108/18986	0.00925926	2.37563	0.896781	0.344895	0.524498	0.495582	TNFSF10	1
GO:0032760	positive regulation of tumor necrosis factor production	1/74	108/18986	0.00925926	2.37563	0.896781	0.344895	0.524498	0.495582	TLR9	1
GO:0033045	regulation of sister chromatid segregation	1/74	108/18986	0.00925926	2.37563	0.896781	0.344895	0.524498	0.495582	DPF3	1
GO:0061458	reproductive system development	2/74	313/18986	0.00638978	1.63941	0.713504	0.34537	0.524498	0.495582	TNFSF10/TLR9	2
GO:0071559	response to transforming growth factor beta	2/74	313/18986	0.00638978	1.63941	0.713504	0.34537	0.524498	0.495582	TET1/GCNT2	2
GO:0007162	negative regulation of cell adhesion	2/74	314/18986	0.00636943	1.63419	0.708827	0.346789	0.525064	0.496117	GCNT2/TSPAN32	2
GO:0021549	cerebellum development	1/74	109/18986	0.00917431	2.35383	0.886673	0.347463	0.525064	0.496117	SEMA4C	1
GO:0048144	fibroblast proliferation	1/74	109/18986	0.00917431	2.35383	0.886673	0.347463	0.525064	0.496117	KCNJ8	1
GO:0060079	excitatory postsynaptic potential	1/74	109/18986	0.00917431	2.35383	0.886673	0.347463	0.525064	0.496117	CHRNB1	1
GO:0060291	long-term synaptic potentiation	1/74	110/18986	0.00909091	2.33243	0.876676	0.350021	0.527624	0.498535	RGS14	1
GO:1901890	positive regulation of cell junction assembly	1/74	110/18986	0.00909091	2.33243	0.876676	0.350021	0.527624	0.498535	AMIGO2	1
GO:0050803	regulation of synapse structure or activity	2/74	318/18986	0.00628931	1.61363	0.69028	0.352457	0.529504	0.500311	SEMA4C/AMIGO2	2
GO:0007229	integrin-mediated signaling pathway	1/74	111/18986	0.00900901	2.31142	0.866786	0.352569	0.529504	0.500311	TSPAN32	1
GO:0030203	glycosaminoglycan metabolic process	1/74	111/18986	0.00900901	2.31142	0.866786	0.352569	0.529504	0.500311	GCNT2	1
GO:0014013	regulation of gliogenesis	1/74	112/18986	0.00892857	2.29078	0.857003	0.355107	0.530705	0.501446	GJC2	1
GO:0022600	digestive system process	1/74	112/18986	0.00892857	2.29078	0.857003	0.355107	0.530705	0.501446	TLR9	1
GO:0140888	interferon-mediated signaling pathway	1/74	112/18986	0.00892857	2.29078	0.857003	0.355107	0.530705	0.501446	IRF7	1
GO:1903557	positive regulation of tumor necrosis factor superfamily cytokine production	1/74	112/18986	0.00892857	2.29078	0.857003	0.355107	0.530705	0.501446	TLR9	1
GO:0036503	ERAD pathway	1/74	113/18986	0.00884956	2.27051	0.847323	0.357636	0.533675	0.504253	BRSK2	1
GO:0044403	biological process involved in symbiotic interaction	2/74	322/18986	0.00621118	1.59359	0.67199	0.358109	0.533675	0.504253	IFIT1/GSDMB	2
GO:0019058	viral life cycle	2/74	323/18986	0.00619195	1.58865	0.667456	0.359519	0.533675	0.504253	RAB43/IFIT1	2
GO:0007173	epidermal growth factor receptor signaling pathway	1/74	114/18986	0.00877193	2.25059	0.837745	0.360154	0.533675	0.504253	AQP5-AS1	1
GO:0010821	regulation of mitochondrion organization	1/74	114/18986	0.00877193	2.25059	0.837745	0.360154	0.533675	0.504253	TNFSF10	1
GO:0033559	unsaturated fatty acid metabolic process	1/74	114/18986	0.00877193	2.25059	0.837745	0.360154	0.533675	0.504253	SCD5	1
GO:2001056	positive regulation of cysteine-type endopeptidase activity	1/74	114/18986	0.00877193	2.25059	0.837745	0.360154	0.533675	0.504253	TNFSF10	1
GO:0045445	myoblast differentiation	1/74	115/18986	0.00869565	2.23102	0.828266	0.362663	0.536092	0.506536	DPF3	1
GO:0051303	establishment of chromosome localization	1/74	115/18986	0.00869565	2.23102	0.828266	0.362663	0.536092	0.506536	KIFC1	1
GO:0006661	phosphatidylinositol biosynthetic process	1/74	116/18986	0.00862069	2.21179	0.818884	0.365163	0.538482	0.508795	INPP5J	1
GO:0090263	positive regulation of canonical Wnt signaling pathway	1/74	116/18986	0.00862069	2.21179	0.818884	0.365163	0.538482	0.508795	GPRC5B	1
GO:0006766	vitamin metabolic process	1/74	117/18986	0.00854701	2.19289	0.809598	0.367652	0.540645	0.510839	SLC23A1	1
GO:1903076	regulation of protein localization to plasma membrane	1/74	117/18986	0.00854701	2.19289	0.809598	0.367652	0.540645	0.510839	TMBIM1	1
GO:0010948	negative regulation of cell cycle process	2/74	329/18986	0.00607903	1.55968	0.640575	0.367958	0.540645	0.510839	BRSK2/GJC2	2
GO:0050731	positive regulation of peptidyl-tyrosine phosphorylation	1/74	118/18986	0.00847458	2.1743	0.800406	0.370132	0.542806	0.51288	GPRC5B	1
GO:0046394	carboxylic acid biosynthetic process	2/74	331/18986	0.0060423	1.55026	0.631734	0.370761	0.542806	0.51288	SCD5/NAGS	2
GO:0051345	positive regulation of hydrolase activity	2/74	331/18986	0.0060423	1.55026	0.631734	0.370761	0.542806	0.51288	RGS14/TNFSF10	2
GO:0022037	metencephalon development	1/74	119/18986	0.00840336	2.15603	0.791304	0.372602	0.544196	0.514193	SEMA4C	1
GO:0099565	chemical synaptic transmission, postsynaptic	1/74	119/18986	0.00840336	2.15603	0.791304	0.372602	0.544196	0.514193	CHRNB1	1
GO:0016053	organic acid biosynthetic process	2/74	334/18986	0.00598802	1.53633	0.618582	0.374958	0.545831	0.515738	SCD5/NAGS	2
GO:0000045	autophagosome assembly	1/74	120/18986	0.00833333	2.13806	0.782293	0.375063	0.545831	0.515738	RAB43	1
GO:0051928	positive regulation of calcium ion transport	1/74	120/18986	0.00833333	2.13806	0.782293	0.375063	0.545831	0.515738	GJC2	1
GO:0009308	amine metabolic process	1/74	121/18986	0.00826446	2.12039	0.77337	0.377514	0.547783	0.517582	PAOX	1
GO:0034341	response to type II interferon	1/74	121/18986	0.00826446	2.12039	0.77337	0.377514	0.547783	0.517582	RAB43	1
GO:0002429	immune response-activating cell surface receptor signaling pathway	2/74	336/18986	0.00595238	1.52719	0.609885	0.37775	0.547783	0.517582	CMTM3/BTN2A3P	2
GO:1902105	regulation of leukocyte differentiation	2/74	337/18986	0.00593472	1.52266	0.605558	0.379144	0.548376	0.518143	IRF7/TLR9	2
GO:0006022	aminoglycan metabolic process	1/74	122/18986	0.00819672	2.10301	0.764533	0.379956	0.548376	0.518143	GCNT2	1
GO:0039531	regulation of cytoplasmic pattern recognition receptor signaling pathway	1/74	122/18986	0.00819672	2.10301	0.764533	0.379956	0.548376	0.518143	TLR9	1
GO:0071887	leukocyte apoptotic process	1/74	122/18986	0.00819672	2.10301	0.764533	0.379956	0.548376	0.518143	IRF7	1
GO:0030326	embryonic limb morphogenesis	1/74	123/18986	0.00813008	2.08592	0.75578	0.382388	0.548896	0.518634	SALL4	1
GO:0035113	embryonic appendage morphogenesis	1/74	123/18986	0.00813008	2.08592	0.75578	0.382388	0.548896	0.518634	SALL4	1
GO:0050000	chromosome localization	1/74	123/18986	0.00813008	2.08592	0.75578	0.382388	0.548896	0.518634	KIFC1	1
GO:0072009	nephron epithelium development	1/74	123/18986	0.00813008	2.08592	0.75578	0.382388	0.548896	0.518634	GDNF	1
GO:0070661	leukocyte proliferation	2/74	341/18986	0.0058651	1.5048	0.588388	0.384708	0.548896	0.518634	TSPAN32/TLR9	2
GO:0015749	monosaccharide transmembrane transport	1/74	124/18986	0.00806452	2.06909	0.747111	0.384811	0.548896	0.518634	SLC23A1	1
GO:0031640	killing of cells of another organism	1/74	124/18986	0.00806452	2.06909	0.747111	0.384811	0.548896	0.518634	GSDMB	1
GO:0032609	type II interferon production	1/74	124/18986	0.00806452	2.06909	0.747111	0.384811	0.548896	0.518634	TLR9	1
GO:0032649	regulation of type II interferon production	1/74	124/18986	0.00806452	2.06909	0.747111	0.384811	0.548896	0.518634	TLR9	1
GO:0141061	disruption of cell in another organism	1/74	124/18986	0.00806452	2.06909	0.747111	0.384811	0.548896	0.518634	GSDMB	1
GO:0031400	negative regulation of protein modification process	2/74	342/18986	0.00584795	1.5004	0.584129	0.386095	0.549444	0.519152	RGS14/TRIB2	2
GO:0042742	defense response to bacterium	2/74	342/18986	0.00584795	1.5004	0.584129	0.386095	0.549444	0.519152	GSDMB/TLR9	2
GO:0010717	regulation of epithelial to mesenchymal transition	1/74	126/18986	0.00793651	2.03625	0.730015	0.389629	0.553827	0.523293	GCNT2	1
GO:0051235	maintenance of location	2/74	345/18986	0.0057971	1.48735	0.571435	0.390251	0.554065	0.523519	PLCD1/TMEM38A	2
GO:0052547	regulation of peptidase activity	2/74	346/18986	0.00578035	1.48305	0.56723	0.391633	0.554648	0.524069	TNFSF10/PAPLN	2
GO:0141060	disruption of anatomical structure in another organism	1/74	127/18986	0.00787402	2.02022	0.721585	0.392024	0.554648	0.524069	GSDMB	1
GO:1905037	autophagosome organization	1/74	127/18986	0.00787402	2.02022	0.721585	0.392024	0.554648	0.524069	RAB43	1
GO:0003231	cardiac ventricle development	1/74	128/18986	0.0078125	2.00443	0.713232	0.39441	0.556733	0.526039	SALL4	1
GO:0072089	stem cell proliferation	1/74	128/18986	0.0078125	2.00443	0.713232	0.39441	0.556733	0.526039	THPO	1
GO:0051702	biological process involved in interaction with symbiont	1/74	129/18986	0.00775194	1.9889	0.704955	0.396786	0.559441	0.528598	GSDMB	1
GO:0002761	regulation of myeloid leukocyte differentiation	1/74	130/18986	0.00769231	1.9736	0.696752	0.399153	0.561482	0.530526	IRF7	1
GO:0019079	viral genome replication	1/74	130/18986	0.00769231	1.9736	0.696752	0.399153	0.561482	0.530526	IFIT1	1
GO:0032434	regulation of proteasomal ubiquitin-dependent protein catabolic process	1/74	131/18986	0.00763359	1.95853	0.688622	0.401511	0.5635	0.532433	TRIB2	1
GO:0055007	cardiac muscle cell differentiation	1/74	131/18986	0.00763359	1.95853	0.688622	0.401511	0.5635	0.532433	KCNJ8	1
GO:0032496	response to lipopolysaccharide	2/74	354/18986	0.00564972	1.44953	0.534056	0.402643	0.564203	0.533097	KCNJ8/TLR9	2
GO:0007127	meiosis I	1/74	132/18986	0.00757576	1.94369	0.680564	0.40386	0.564203	0.533097	RNF212	1
GO:0010977	negative regulation of neuron projection development	1/74	132/18986	0.00757576	1.94369	0.680564	0.40386	0.564203	0.533097	INPP5J	1
GO:0030512	negative regulation of transforming growth factor beta receptor signaling pathway	1/74	132/18986	0.00757576	1.94369	0.680564	0.40386	0.564203	0.533097	TET1	1
GO:0050864	regulation of B cell activation	1/74	133/18986	0.0075188	1.92908	0.672575	0.4062	0.566823	0.535573	TLR9	1
GO:0007052	mitotic spindle organization	1/74	134/18986	0.00746269	1.91468	0.664656	0.408531	0.566836	0.535585	KIFC1	1
GO:0038061	non-canonical NF-kappaB signal transduction	1/74	134/18986	0.00746269	1.91468	0.664656	0.408531	0.566836	0.535585	TLR9	1
GO:0043271	negative regulation of monoatomic ion transport	1/74	134/18986	0.00746269	1.91468	0.664656	0.408531	0.566836	0.535585	TLR9	1
GO:0050868	negative regulation of T cell activation	1/74	134/18986	0.00746269	1.91468	0.664656	0.408531	0.566836	0.535585	TSPAN32	1
GO:0051225	spindle assembly	1/74	134/18986	0.00746269	1.91468	0.664656	0.408531	0.566836	0.535585	KIFC1	1
GO:0051983	regulation of chromosome segregation	1/74	135/18986	0.00740741	1.9005	0.656804	0.410852	0.56941	0.538018	DPF3	1
GO:0007041	lysosomal transport	1/74	136/18986	0.00735294	1.88653	0.64902	0.413165	0.57122	0.539728	CACNG8	1
GO:0038127	ERBB signaling pathway	1/74	136/18986	0.00735294	1.88653	0.64902	0.413165	0.57122	0.539728	AQP5-AS1	1
GO:1990778	protein localization to cell periphery	2/74	362/18986	0.00552486	1.4175	0.50168	0.413561	0.57122	0.539728	TMBIM1/EHD2	2
GO:0010950	positive regulation of endopeptidase activity	1/74	137/18986	0.00729927	1.87276	0.6413	0.415469	0.571914	0.540383	TNFSF10	1
GO:0034219	carbohydrate transmembrane transport	1/74	137/18986	0.00729927	1.87276	0.6413	0.415469	0.571914	0.540383	SLC23A1	1
GO:0048565	digestive tract development	1/74	137/18986	0.00729927	1.87276	0.6413	0.415469	0.571914	0.540383	TLR9	1
GO:0045739	positive regulation of DNA repair	1/74	138/18986	0.00724638	1.85919	0.633645	0.417764	0.574425	0.542756	DPF3	1
GO:0030183	B cell differentiation	1/74	139/18986	0.00719424	1.84581	0.626054	0.420049	0.576802	0.545002	TLR9	1
GO:1901990	regulation of mitotic cell cycle phase transition	2/74	368/18986	0.00543478	1.39439	0.477897	0.421687	0.576802	0.545002	DPF3/GJC2	2
GO:0032388	positive regulation of intracellular transport	1/74	140/18986	0.00714286	1.83263	0.618524	0.422327	0.576802	0.545002	EHD2	1
GO:0043547	positive regulation of GTPase activity	1/74	140/18986	0.00714286	1.83263	0.618524	0.422327	0.576802	0.545002	RGS14	1
GO:0046328	regulation of JNK cascade	1/74	140/18986	0.00714286	1.83263	0.618524	0.422327	0.576802	0.545002	TLR9	1
GO:0061982	meiosis I cell cycle process	1/74	140/18986	0.00714286	1.83263	0.618524	0.422327	0.576802	0.545002	RNF212	1
GO:0002768	immune response-regulating cell surface receptor signaling pathway	2/74	369/18986	0.00542005	1.39061	0.473974	0.423036	0.577125	0.545307	CMTM3/BTN2A3P	2
GO:0000086	G2/M transition of mitotic cell cycle	1/74	141/18986	0.0070922	1.81963	0.611056	0.424595	0.577317	0.545488	BRSK2	1
GO:0030168	platelet activation	1/74	141/18986	0.0070922	1.81963	0.611056	0.424595	0.577317	0.545488	TSPAN32	1
GO:0031623	receptor internalization	1/74	141/18986	0.0070922	1.81963	0.611056	0.424595	0.577317	0.545488	CACNG8	1
GO:0009306	protein secretion	2/74	371/18986	0.00539084	1.38311	0.46616	0.425729	0.578215	0.546337	BRSK2/KCNJ8	2
GO:0008643	carbohydrate transport	1/74	142/18986	0.00704225	1.80681	0.603647	0.426854	0.578456	0.546565	SLC23A1	1
GO:0031109	microtubule polymerization or depolymerization	1/74	142/18986	0.00704225	1.80681	0.603647	0.426854	0.578456	0.546565	INPP5J	1
GO:0018205	peptidyl-lysine modification	1/74	143/18986	0.00699301	1.79418	0.596298	0.429105	0.579176	0.547245	RNF212	1
GO:0048813	dendrite morphogenesis	1/74	143/18986	0.00699301	1.79418	0.596298	0.429105	0.579176	0.547245	TET1	1
GO:0006644	phospholipid metabolic process	2/74	374/18986	0.00534759	1.37202	0.454524	0.429757	0.579176	0.547245	INPP5J/PLCD1	2
GO:0035592	establishment of protein localization to extracellular region	2/74	374/18986	0.00534759	1.37202	0.454524	0.429757	0.579176	0.547245	BRSK2/KCNJ8	2
GO:0042176	regulation of protein catabolic process	2/74	374/18986	0.00534759	1.37202	0.454524	0.429757	0.579176	0.547245	TRIB2/ECSCR	2
GO:0002237	response to molecule of bacterial origin	2/74	375/18986	0.00533333	1.36836	0.450667	0.431097	0.5794	0.547457	KCNJ8/TLR9	2
GO:0043281	regulation of cysteine-type endopeptidase activity involved in apoptotic process	1/74	144/18986	0.00694444	1.78172	0.589008	0.431347	0.5794	0.547457	TNFSF10	1
GO:1904064	positive regulation of cation transmembrane transport	1/74	144/18986	0.00694444	1.78172	0.589008	0.431347	0.5794	0.547457	GJC2	1
GO:0050671	positive regulation of lymphocyte proliferation	1/74	145/18986	0.00689655	1.76943	0.581774	0.43358	0.581121	0.549083	TLR9	1
GO:2000779	regulation of double-strand break repair	1/74	145/18986	0.00689655	1.76943	0.581774	0.43358	0.581121	0.549083	DPF3	1
GO:0007269	neurotransmitter secretion	1/74	146/18986	0.00684932	1.75731	0.574597	0.435805	0.58155	0.549488	KCNJ8	1
GO:0050770	regulation of axonogenesis	1/74	146/18986	0.00684932	1.75731	0.574597	0.435805	0.58155	0.549488	BRSK2	1
GO:0099643	signal release from synapse	1/74	146/18986	0.00684932	1.75731	0.574597	0.435805	0.58155	0.549488	KCNJ8	1
GO:1903900	regulation of viral life cycle	1/74	146/18986	0.00684932	1.75731	0.574597	0.435805	0.58155	0.549488	IFIT1	1
GO:0010952	positive regulation of peptidase activity	1/74	147/18986	0.00680272	1.74536	0.567475	0.438021	0.582597	0.550477	TNFSF10	1
GO:0034763	negative regulation of transmembrane transport	1/74	147/18986	0.00680272	1.74536	0.567475	0.438021	0.582597	0.550477	TLR9	1
GO:0045598	regulation of fat cell differentiation	1/74	147/18986	0.00680272	1.74536	0.567475	0.438021	0.582597	0.550477	TRIB2	1
GO:0032946	positive regulation of mononuclear cell proliferation	1/74	148/18986	0.00675676	1.73356	0.560408	0.440229	0.582623	0.550502	TLR9	1
GO:0034614	cellular response to reactive oxygen species	1/74	148/18986	0.00675676	1.73356	0.560408	0.440229	0.582623	0.550502	TET1	1
GO:0055123	digestive system development	1/74	148/18986	0.00675676	1.73356	0.560408	0.440229	0.582623	0.550502	TLR9	1
GO:0071333	cellular response to glucose stimulus	1/74	148/18986	0.00675676	1.73356	0.560408	0.440229	0.582623	0.550502	BRSK2	1
GO:0071692	protein localization to extracellular region	2/74	382/18986	0.0052356	1.34329	0.423971	0.440427	0.582623	0.550502	BRSK2/KCNJ8	2
GO:0050767	regulation of neurogenesis	2/74	383/18986	0.00522193	1.33978	0.4202	0.441753	0.583745	0.551562	RGS14/GJC2	2
GO:0050852	T cell receptor signaling pathway	1/74	149/18986	0.00671141	1.72193	0.553394	0.442427	0.584004	0.551807	BTN2A3P	1
GO:0046486	glycerolipid metabolic process	2/74	385/18986	0.00519481	1.33282	0.412688	0.4444	0.585346	0.553075	INPP5J/PLCD1	2
GO:0099175	regulation of postsynapse organization	1/74	150/18986	0.00666667	1.71045	0.546434	0.444618	0.585346	0.553075	SEMA4C	1
GO:0033157	regulation of intracellular protein transport	1/74	151/18986	0.00662252	1.69912	0.539525	0.4468	0.585346	0.553075	BRSK2	1
GO:0035107	appendage morphogenesis	1/74	151/18986	0.00662252	1.69912	0.539525	0.4468	0.585346	0.553075	SALL4	1
GO:0035108	limb morphogenesis	1/74	151/18986	0.00662252	1.69912	0.539525	0.4468	0.585346	0.553075	SALL4	1
GO:0060078	regulation of postsynaptic membrane potential	1/74	151/18986	0.00662252	1.69912	0.539525	0.4468	0.585346	0.553075	CHRNB1	1
GO:0071331	cellular response to hexose stimulus	1/74	151/18986	0.00662252	1.69912	0.539525	0.4468	0.585346	0.553075	BRSK2	1
GO:0007093	mitotic cell cycle checkpoint signaling	1/74	152/18986	0.00657895	1.68794	0.532668	0.448973	0.586306	0.553982	BRSK2	1
GO:0030177	positive regulation of Wnt signaling pathway	1/74	152/18986	0.00657895	1.68794	0.532668	0.448973	0.586306	0.553982	GPRC5B	1
GO:0031333	negative regulation of protein-containing complex assembly	1/74	152/18986	0.00657895	1.68794	0.532668	0.448973	0.586306	0.553982	INPP5J	1
GO:0071326	cellular response to monosaccharide stimulus	1/74	153/18986	0.00653595	1.67691	0.525861	0.451138	0.586624	0.554282	BRSK2	1
GO:1903038	negative regulation of leukocyte cell-cell adhesion	1/74	153/18986	0.00653595	1.67691	0.525861	0.451138	0.586624	0.554282	TSPAN32	1
GO:1904375	regulation of protein localization to cell periphery	1/74	153/18986	0.00653595	1.67691	0.525861	0.451138	0.586624	0.554282	TMBIM1	1
GO:2001235	positive regulation of apoptotic signaling pathway	1/74	153/18986	0.00653595	1.67691	0.525861	0.451138	0.586624	0.554282	TNFSF10	1
GO:0032970	regulation of actin filament-based process	2/74	395/18986	0.00506329	1.29908	0.375735	0.457536	0.593109	0.56041	ARHGEF19/HCN4	2
GO:0008037	cell recognition	1/74	156/18986	0.00641026	1.64466	0.505735	0.457583	0.593109	0.56041	ATP8B3	1
GO:1905039	carboxylic acid transmembrane transport	1/74	156/18986	0.00641026	1.64466	0.505735	0.457583	0.593109	0.56041	SLC23A1	1
GO:0034767	positive regulation of monoatomic ion transmembrane transport	1/74	157/18986	0.00636943	1.63419	0.499122	0.459715	0.594532	0.561755	GJC2	1
GO:0098876	vesicle-mediated transport to the plasma membrane	1/74	157/18986	0.00636943	1.63419	0.499122	0.459715	0.594532	0.561755	EHD2	1
GO:0141091	transforming growth factor beta receptor superfamily signaling pathway	2/74	397/18986	0.00503778	1.29253	0.368462	0.460142	0.594532	0.561755	TET1/GCNT2	2
GO:0044839	cell cycle G2/M phase transition	1/74	158/18986	0.00632911	1.62385	0.492556	0.461838	0.595464	0.562635	BRSK2	1
GO:0048754	branching morphogenesis of an epithelial tube	1/74	158/18986	0.00632911	1.62385	0.492556	0.461838	0.595464	0.562635	GDNF	1
GO:1903825	organic acid transmembrane transport	1/74	159/18986	0.00628931	1.61363	0.486036	0.463953	0.59756	0.564616	SLC23A1	1
GO:0008277	regulation of G protein-coupled receptor signaling pathway	1/74	160/18986	0.00625	1.60355	0.479562	0.46606	0.597752	0.564797	RGS14	1
GO:0016525	negative regulation of angiogenesis	1/74	160/18986	0.00625	1.60355	0.479562	0.46606	0.597752	0.564797	ECSCR	1
GO:0072006	nephron development	1/74	160/18986	0.00625	1.60355	0.479562	0.46606	0.597752	0.564797	GDNF	1
GO:0097696	cell surface receptor signaling pathway via STAT	1/74	160/18986	0.00625	1.60355	0.479562	0.46606	0.597752	0.564797	THPO	1
GO:0030902	hindbrain development	1/74	162/18986	0.00617284	1.58375	0.466747	0.47025	0.600915	0.567785	SEMA4C	1
GO:0050730	regulation of peptidyl-tyrosine phosphorylation	1/74	162/18986	0.00617284	1.58375	0.466747	0.47025	0.600915	0.567785	GPRC5B	1
GO:2000181	negative regulation of blood vessel morphogenesis	1/74	162/18986	0.00617284	1.58375	0.466747	0.47025	0.600915	0.567785	ECSCR	1
GO:0006979	response to oxidative stress	2/74	405/18986	0.00493827	1.267	0.339748	0.470495	0.600915	0.567785	TET1/RGS14	2
GO:0071322	cellular response to carbohydrate stimulus	1/74	163/18986	0.00613497	1.57403	0.460404	0.472332	0.602631	0.569407	BRSK2	1
GO:1901343	negative regulation of vasculature development	1/74	164/18986	0.00609756	1.56444	0.454105	0.474407	0.604646	0.57131	ECSCR	1
GO:0006633	fatty acid biosynthetic process	1/74	165/18986	0.00606061	1.55495	0.447848	0.476473	0.605479	0.572098	SCD5	1
GO:0006865	amino acid transport	1/74	165/18986	0.00606061	1.55495	0.447848	0.476473	0.605479	0.572098	KCNJ8	1
GO:0002697	regulation of immune effector process	2/74	410/18986	0.00487805	1.25155	0.3221	0.476907	0.605479	0.572098	GPRC5B/TLR9	2
GO:0010508	positive regulation of autophagy	1/74	166/18986	0.0060241	1.54559	0.441633	0.478531	0.605479	0.572098	TLR9	1
GO:0051147	regulation of muscle cell differentiation	1/74	166/18986	0.0060241	1.54559	0.441633	0.478531	0.605479	0.572098	MAMSTR	1
GO:0070507	regulation of microtubule cytoskeleton organization	1/74	166/18986	0.0060241	1.54559	0.441633	0.478531	0.605479	0.572098	INPP5J	1
GO:0070665	positive regulation of leukocyte proliferation	1/74	166/18986	0.0060241	1.54559	0.441633	0.478531	0.605479	0.572098	TLR9	1
GO:0006367	transcription initiation at RNA polymerase II promoter	1/74	167/18986	0.00598802	1.53633	0.435458	0.480582	0.605563	0.572177	TET1	1
GO:0035051	cardiocyte differentiation	1/74	167/18986	0.00598802	1.53633	0.435458	0.480582	0.605563	0.572177	KCNJ8	1
GO:1902850	microtubule cytoskeleton organization involved in mitosis	1/74	167/18986	0.00598802	1.53633	0.435458	0.480582	0.605563	0.572177	KIFC1	1
GO:2000116	regulation of cysteine-type endopeptidase activity	1/74	167/18986	0.00598802	1.53633	0.435458	0.480582	0.605563	0.572177	TNFSF10	1
GO:0007156	homophilic cell adhesion via plasma membrane adhesion molecules	1/74	168/18986	0.00595238	1.52719	0.429325	0.482624	0.606884	0.573425	AMIGO2	1
GO:0051494	negative regulation of cytoskeleton organization	1/74	168/18986	0.00595238	1.52719	0.429325	0.482624	0.606884	0.573425	INPP5J	1
GO:0051250	negative regulation of lymphocyte activation	1/74	169/18986	0.00591716	1.51815	0.423231	0.484659	0.608189	0.574659	TSPAN32	1
GO:1990138	neuron projection extension	1/74	169/18986	0.00591716	1.51815	0.423231	0.484659	0.608189	0.574659	PAK6	1
GO:0001678	intracellular glucose homeostasis	1/74	170/18986	0.00588235	1.50922	0.417176	0.486685	0.610106	0.576469	BRSK2	1
GO:0045786	negative regulation of cell cycle	2/74	419/18986	0.00477327	1.22467	0.290888	0.488333	0.610755	0.577083	BRSK2/GJC2	2
GO:0061351	neural precursor cell proliferation	1/74	171/18986	0.00584795	1.5004	0.411161	0.488704	0.610755	0.577083	GJC2	1
GO:2000058	regulation of ubiquitin-dependent protein catabolic process	1/74	171/18986	0.00584795	1.5004	0.411161	0.488704	0.610755	0.577083	TRIB2	1
GO:0007034	vacuolar transport	1/74	173/18986	0.00578035	1.48305	0.399244	0.492718	0.612636	0.578861	CACNG8	1
GO:0015748	organophosphate ester transport	1/74	173/18986	0.00578035	1.48305	0.399244	0.492718	0.612636	0.578861	ATP8B3	1
GO:0050792	regulation of viral process	1/74	173/18986	0.00578035	1.48305	0.399244	0.492718	0.612636	0.578861	IFIT1	1
GO:0050796	regulation of insulin secretion	1/74	173/18986	0.00578035	1.48305	0.399244	0.492718	0.612636	0.578861	BRSK2	1
GO:1902904	negative regulation of supramolecular fiber organization	1/74	173/18986	0.00578035	1.48305	0.399244	0.492718	0.612636	0.578861	INPP5J	1
GO:0014706	striated muscle tissue development	2/74	424/18986	0.00471698	1.21022	0.273846	0.494614	0.614368	0.580497	HCN4/KCNJ8	2
GO:0007178	cell surface receptor protein serine/threonine kinase signaling pathway	2/74	425/18986	0.00470588	1.20738	0.270462	0.495865	0.615296	0.581373	TET1/GCNT2	2
GO:0043604	amide biosynthetic process	1/74	175/18986	0.00571429	1.4661	0.387476	0.496701	0.615708	0.581763	NAGS	1
GO:0050905	neuromuscular process	1/74	176/18986	0.00568182	1.45777	0.381647	0.498681	0.617535	0.583489	KCNJ8	1
GO:0007254	JNK cascade	1/74	177/18986	0.00564972	1.44953	0.375854	0.500653	0.618097	0.58402	TLR9	1
GO:0032635	interleukin-6 production	1/74	177/18986	0.00564972	1.44953	0.375854	0.500653	0.618097	0.58402	TLR9	1
GO:0032675	regulation of interleukin-6 production	1/74	177/18986	0.00564972	1.44953	0.375854	0.500653	0.618097	0.58402	TLR9	1
GO:0003002	regionalization	2/74	430/18986	0.00465116	1.19334	0.253665	0.502089	0.619243	0.585103	GDNF/NTF4	2
GO:0001936	regulation of endothelial cell proliferation	1/74	179/18986	0.00558659	1.43334	0.364373	0.504575	0.621054	0.586815	FUT2	1
GO:0008361	regulation of cell size	1/74	179/18986	0.00558659	1.43334	0.364373	0.504575	0.621054	0.586815	GPRC5B	1
GO:0016052	carbohydrate catabolic process	1/74	180/18986	0.00555556	1.42538	0.358685	0.506524	0.622199	0.587896	FUT2	1
GO:0017015	regulation of transforming growth factor beta receptor signaling pathway	1/74	180/18986	0.00555556	1.42538	0.358685	0.506524	0.622199	0.587896	TET1	1
GO:0042129	regulation of T cell proliferation	1/74	182/18986	0.00549451	1.40971	0.347409	0.5104	0.62633	0.5918	TSPAN32	1
GO:0050727	regulation of inflammatory response	2/74	438/18986	0.00456621	1.17154	0.227201	0.511947	0.626805	0.592248	GPRC5B/TLR9	2
GO:0071248	cellular response to metal ion	1/74	183/18986	0.00546448	1.40201	0.341822	0.512327	0.626805	0.592248	TLR9	1
GO:1903844	regulation of cellular response to transforming growth factor beta stimulus	1/74	183/18986	0.00546448	1.40201	0.341822	0.512327	0.626805	0.592248	TET1	1
GO:0042060	wound healing	2/74	444/18986	0.0045045	1.15571	0.207674	0.519258	0.634639	0.59965	ARHGEF19/TSPAN32	2
GO:0001959	regulation of cytokine-mediated signaling pathway	1/74	187/18986	0.00534759	1.37202	0.319795	0.519959	0.634639	0.59965	IRF7	1
GO:0043434	response to peptide hormone	2/74	446/18986	0.0044843	1.15053	0.201224	0.52168	0.634639	0.59965	TNFSF10/KCNJ8	2
GO:0031345	negative regulation of cell projection organization	1/74	188/18986	0.00531915	1.36472	0.314367	0.521849	0.634639	0.59965	INPP5J	1
GO:0032640	tumor necrosis factor production	1/74	188/18986	0.00531915	1.36472	0.314367	0.521849	0.634639	0.59965	TLR9	1
GO:0032680	regulation of tumor necrosis factor production	1/74	188/18986	0.00531915	1.36472	0.314367	0.521849	0.634639	0.59965	TLR9	1
GO:0060537	muscle tissue development	2/74	447/18986	0.00447427	1.14795	0.19801	0.522887	0.635031	0.60002	HCN4/KCNJ8	2
GO:0048736	appendage development	1/74	189/18986	0.00529101	1.3575	0.308969	0.523731	0.635031	0.60002	SALL4	1
GO:0060173	limb development	1/74	189/18986	0.00529101	1.3575	0.308969	0.523731	0.635031	0.60002	SALL4	1
GO:0008217	regulation of blood pressure	1/74	190/18986	0.00526316	1.35036	0.303603	0.525606	0.635411	0.60038	KCNJ8	1
GO:0009267	cellular response to starvation	1/74	190/18986	0.00526316	1.35036	0.303603	0.525606	0.635411	0.60038	PAK6	1
GO:0061138	morphogenesis of a branching epithelium	1/74	190/18986	0.00526316	1.35036	0.303603	0.525606	0.635411	0.60038	GDNF	1
GO:0048771	tissue remodeling	1/74	191/18986	0.0052356	1.34329	0.298266	0.527474	0.63605	0.600984	TMBIM1	1
GO:0000280	nuclear division	2/74	451/18986	0.00443459	1.13777	0.185227	0.527698	0.63605	0.600984	KIFC1/RNF212	2
GO:0030099	myeloid cell differentiation	2/74	451/18986	0.00443459	1.13777	0.185227	0.527698	0.63605	0.600984	IRF7/THPO	2
GO:0010975	regulation of neuron projection development	2/74	452/18986	0.00442478	1.13525	0.18205	0.528896	0.636139	0.601068	INPP5J/BRSK2	2
GO:0001837	epithelial to mesenchymal transition	1/74	192/18986	0.00520833	1.33629	0.292959	0.529334	0.636139	0.601068	GCNT2	1
GO:0061025	membrane fusion	1/74	192/18986	0.00520833	1.33629	0.292959	0.529334	0.636139	0.601068	GLIPR1L1	1
GO:0043087	regulation of GTPase activity	1/74	193/18986	0.00518135	1.32937	0.287681	0.531188	0.636202	0.601127	RGS14	1
GO:0071706	tumor necrosis factor superfamily cytokine production	1/74	193/18986	0.00518135	1.32937	0.287681	0.531188	0.636202	0.601127	TLR9	1
GO:1903555	regulation of tumor necrosis factor superfamily cytokine production	1/74	193/18986	0.00518135	1.32937	0.287681	0.531188	0.636202	0.601127	TLR9	1
GO:0001934	positive regulation of protein phosphorylation	2/74	455/18986	0.0043956	1.12777	0.172558	0.532476	0.636202	0.601127	GPRC5B/THPO	2
GO:0000070	mitotic sister chromatid segregation	1/74	194/18986	0.00515464	1.32251	0.282432	0.533034	0.636202	0.601127	KIFC1	1
GO:0045664	regulation of neuron differentiation	1/74	194/18986	0.00515464	1.32251	0.282432	0.533034	0.636202	0.601127	GPRC5B	1
GO:1905475	regulation of protein localization to membrane	1/74	194/18986	0.00515464	1.32251	0.282432	0.533034	0.636202	0.601127	TMBIM1	1
GO:0002695	negative regulation of leukocyte activation	1/74	196/18986	0.00510204	1.30902	0.27202	0.536704	0.638709	0.603496	TSPAN32	1
GO:0030317	flagellated sperm motility	1/74	196/18986	0.00510204	1.30902	0.27202	0.536704	0.638709	0.603496	EFHB	1
GO:0097722	sperm motility	1/74	196/18986	0.00510204	1.30902	0.27202	0.536704	0.638709	0.603496	EFHB	1
GO:0046474	glycerophospholipid biosynthetic process	1/74	197/18986	0.00507614	1.30237	0.266856	0.538529	0.640257	0.604958	INPP5J	1
GO:0010466	negative regulation of peptidase activity	1/74	198/18986	0.00505051	1.2958	0.26172	0.540346	0.641169	0.60582	PAPLN	1
GO:0030324	lung development	1/74	198/18986	0.00505051	1.2958	0.26172	0.540346	0.641169	0.60582	SLC23A1	1
GO:0060759	regulation of response to cytokine stimulus	1/74	199/18986	0.00502513	1.28928	0.256611	0.542157	0.642693	0.60726	IRF7	1
GO:0000302	response to reactive oxygen species	1/74	200/18986	0.005	1.28284	0.251529	0.54396	0.643581	0.608099	TET1	1
GO:0140013	meiotic nuclear division	1/74	200/18986	0.005	1.28284	0.251529	0.54396	0.643581	0.608099	RNF212	1
GO:0043161	proteasome-mediated ubiquitin-dependent protein catabolic process	2/74	467/18986	0.00428266	1.09879	0.135213	0.546618	0.645902	0.610292	KBTBD12/TRIB2	2
GO:0001935	endothelial cell proliferation	1/74	202/18986	0.0049505	1.27014	0.241444	0.547546	0.645902	0.610292	FUT2	1
GO:0030323	respiratory tube development	1/74	202/18986	0.0049505	1.27014	0.241444	0.547546	0.645902	0.610292	SLC23A1	1
GO:0000075	cell cycle checkpoint signaling	1/74	203/18986	0.00492611	1.26388	0.236442	0.549328	0.645902	0.610292	BRSK2	1
GO:0018108	peptidyl-tyrosine phosphorylation	1/74	204/18986	0.00490196	1.25768	0.231464	0.551104	0.645902	0.610292	GPRC5B	1
GO:0051701	biological process involved in interaction with host	1/74	204/18986	0.00490196	1.25768	0.231464	0.551104	0.645902	0.610292	IFIT1	1
GO:0090276	regulation of peptide hormone secretion	1/74	204/18986	0.00490196	1.25768	0.231464	0.551104	0.645902	0.610292	BRSK2	1
GO:0055001	muscle cell development	1/74	205/18986	0.00487805	1.25155	0.226513	0.552873	0.645902	0.610292	CHRNB1	1
GO:0090101	negative regulation of transmembrane receptor protein serine/threonine kinase signaling pathway	1/74	205/18986	0.00487805	1.25155	0.226513	0.552873	0.645902	0.610292	TET1	1
GO:1901991	negative regulation of mitotic cell cycle phase transition	1/74	205/18986	0.00487805	1.25155	0.226513	0.552873	0.645902	0.610292	GJC2	1
GO:0009749	response to glucose	1/74	206/18986	0.00485437	1.24547	0.221586	0.554634	0.645902	0.610292	BRSK2	1
GO:0018212	peptidyl-tyrosine modification	1/74	206/18986	0.00485437	1.24547	0.221586	0.554634	0.645902	0.610292	GPRC5B	1
GO:0030073	insulin secretion	1/74	206/18986	0.00485437	1.24547	0.221586	0.554634	0.645902	0.610292	BRSK2	1
GO:0001763	morphogenesis of a branching structure	1/74	207/18986	0.00483092	1.23946	0.216685	0.556389	0.645902	0.610292	GDNF	1
GO:0002791	regulation of peptide secretion	1/74	207/18986	0.00483092	1.23946	0.216685	0.556389	0.645902	0.610292	BRSK2	1
GO:0016051	carbohydrate biosynthetic process	1/74	207/18986	0.00483092	1.23946	0.216685	0.556389	0.645902	0.610292	FUT2	1
GO:0022408	negative regulation of cell-cell adhesion	1/74	207/18986	0.00483092	1.23946	0.216685	0.556389	0.645902	0.610292	TSPAN32	1
GO:0032271	regulation of protein polymerization	1/74	207/18986	0.00483092	1.23946	0.216685	0.556389	0.645902	0.610292	INPP5J	1
GO:0090087	regulation of peptide transport	1/74	207/18986	0.00483092	1.23946	0.216685	0.556389	0.645902	0.610292	BRSK2	1
GO:0007389	pattern specification process	2/74	476/18986	0.00420168	1.07801	0.107828	0.557031	0.645902	0.610292	GDNF/NTF4	2
GO:0016055	Wnt signaling pathway	2/74	476/18986	0.00420168	1.07801	0.107828	0.557031	0.645902	0.610292	ARHGEF19/GPRC5B	2
GO:0051260	protein homooligomerization	1/74	208/18986	0.00480769	1.2335	0.211808	0.558137	0.646571	0.610924	KCNJ12	1
GO:0006352	DNA-templated transcription initiation	1/74	209/18986	0.00478469	1.2276	0.206956	0.559879	0.64736	0.61167	TET1	1
GO:0016064	immunoglobulin mediated immune response	1/74	209/18986	0.00478469	1.2276	0.206956	0.559879	0.64736	0.61167	IRF7	1
GO:0042327	positive regulation of phosphorylation	2/74	479/18986	0.00417537	1.07126	0.098814	0.560465	0.647425	0.611731	GPRC5B/THPO	2
GO:0007018	microtubule-based movement	2/74	480/18986	0.00416667	1.06903	0.0958218	0.561606	0.648129	0.612397	KIFC1/EFHB	2
GO:0009746	response to hexose	1/74	211/18986	0.00473934	1.21596	0.197323	0.563341	0.649518	0.613709	BRSK2	1
GO:0019724	B cell mediated immunity	1/74	212/18986	0.00471698	1.21022	0.192542	0.565062	0.650887	0.615003	IRF7	1
GO:0002443	leukocyte mediated immunity	2/74	485/18986	0.00412371	1.05801	0.080953	0.567278	0.652824	0.616832	IRF7/TLR9	2
GO:0031503	protein-containing complex localization	1/74	214/18986	0.0046729	1.19891	0.18305	0.568484	0.653596	0.617562	CACNG8	1
GO:0042098	T cell proliferation	1/74	215/18986	0.00465116	1.19334	0.178338	0.570185	0.653705	0.617665	TSPAN32	1
GO:0043270	positive regulation of monoatomic ion transport	1/74	215/18986	0.00465116	1.19334	0.178338	0.570185	0.653705	0.617665	GJC2	1
GO:0060294	cilium movement involved in cell motility	1/74	215/18986	0.00465116	1.19334	0.178338	0.570185	0.653705	0.617665	EFHB	1
GO:0034764	positive regulation of transmembrane transport	1/74	216/18986	0.00462963	1.18781	0.173649	0.571879	0.655033	0.61892	GJC2	1
GO:0001539	cilium or flagellum-dependent cell motility	1/74	218/18986	0.00458716	1.17692	0.164338	0.575249	0.657043	0.620819	EFHB	1
GO:0034284	response to monosaccharide	1/74	218/18986	0.00458716	1.17692	0.164338	0.575249	0.657043	0.620819	BRSK2	1
GO:0060285	cilium-dependent cell motility	1/74	218/18986	0.00458716	1.17692	0.164338	0.575249	0.657043	0.620819	EFHB	1
GO:0002064	epithelial cell development	1/74	219/18986	0.00456621	1.17154	0.159715	0.576923	0.657725	0.621463	TLR9	1
GO:0050866	negative regulation of cell activation	1/74	219/18986	0.00456621	1.17154	0.159715	0.576923	0.657725	0.621463	TSPAN32	1
GO:0002819	regulation of adaptive immune response	1/74	221/18986	0.00452489	1.16094	0.150535	0.580253	0.660904	0.624467	IRF7	1
GO:0099504	synaptic vesicle cycle	1/74	222/18986	0.0045045	1.15571	0.145976	0.581909	0.661555	0.625083	BRSK2	1
GO:1903046	meiotic cell cycle process	1/74	222/18986	0.0045045	1.15571	0.145976	0.581909	0.661555	0.625083	RNF212	1
GO:0010810	regulation of cell-substrate adhesion	1/74	223/18986	0.0044843	1.15053	0.141439	0.583557	0.661582	0.625108	GCNT2	1
GO:0045619	regulation of lymphocyte differentiation	1/74	223/18986	0.0044843	1.15053	0.141439	0.583557	0.661582	0.625108	TLR9	1
GO:1903828	negative regulation of protein localization	1/74	223/18986	0.0044843	1.15053	0.141439	0.583557	0.661582	0.625108	TMBIM1	1
GO:0072330	monocarboxylic acid biosynthetic process	1/74	224/18986	0.00446429	1.14539	0.136922	0.5852	0.662828	0.626286	SCD5	1
GO:0051648	vesicle localization	1/74	225/18986	0.00444444	1.1403	0.132426	0.586836	0.663451	0.626873	BRSK2	1
GO:0060541	respiratory system development	1/74	225/18986	0.00444444	1.1403	0.132426	0.586836	0.663451	0.626873	SLC23A1	1
GO:0006282	regulation of DNA repair	1/74	227/18986	0.00440529	1.13025	0.123495	0.590089	0.666511	0.629765	DPF3	1
GO:0071222	cellular response to lipopolysaccharide	1/74	228/18986	0.00438596	1.1253	0.11906	0.591706	0.66772	0.630907	TLR9	1
GO:0042594	response to starvation	1/74	230/18986	0.00434783	1.11551	0.110248	0.594921	0.670728	0.63375	PAK6	1
GO:0048588	developmental cell growth	1/74	232/18986	0.00431034	1.10589	0.101513	0.598111	0.673703	0.63656	PAK6	1
GO:0007596	blood coagulation	1/74	234/18986	0.0042735	1.09644	0.092855	0.601277	0.676644	0.639339	TSPAN32	1
GO:0031331	positive regulation of cellular catabolic process	1/74	235/18986	0.00425532	1.09178	0.0885539	0.60285	0.67779	0.640422	TLR9	1
GO:0019318	hexose metabolic process	1/74	238/18986	0.00420168	1.07801	0.0757603	0.607534	0.6818	0.644212	FUT2	1
GO:0060560	developmental growth involved in morphogenesis	1/74	238/18986	0.00420168	1.07801	0.0757603	0.607534	0.6818	0.644212	PAK6	1
GO:0016358	dendrite development	1/74	239/18986	0.0041841	1.0735	0.0715318	0.609083	0.682911	0.645261	TET1	1
GO:0007033	vacuole organization	1/74	240/18986	0.00416667	1.06903	0.0673211	0.610626	0.683386	0.64571	RAB43	1
GO:0045017	glycerolipid biosynthetic process	1/74	240/18986	0.00416667	1.06903	0.0673211	0.610626	0.683386	0.64571	INPP5J	1
GO:0007599	hemostasis	1/74	241/18986	0.00414938	1.0646	0.063128	0.612163	0.683853	0.646151	TSPAN32	1
GO:0050817	coagulation	1/74	241/18986	0.00414938	1.0646	0.063128	0.612163	0.683853	0.646151	TSPAN32	1
GO:0071219	cellular response to molecule of bacterial origin	1/74	242/18986	0.00413223	1.0602	0.0589523	0.613694	0.684761	0.647009	TLR9	1
GO:0008654	phospholipid biosynthetic process	1/74	243/18986	0.00411523	1.05583	0.0547938	0.615219	0.684761	0.647009	INPP5J	1
GO:0009743	response to carbohydrate	1/74	243/18986	0.00411523	1.05583	0.0547938	0.615219	0.684761	0.647009	BRSK2	1
GO:0045860	positive regulation of protein kinase activity	1/74	243/18986	0.00411523	1.05583	0.0547938	0.615219	0.684761	0.647009	GPRC5B	1
GO:0002573	myeloid leukocyte differentiation	1/74	247/18986	0.00404858	1.03874	0.0383294	0.62126	0.690855	0.652767	IRF7	1
GO:0052548	regulation of endopeptidase activity	1/74	248/18986	0.00403226	1.03455	0.0342549	0.622756	0.691888	0.653743	TNFSF10	1
GO:0030072	peptide hormone secretion	1/74	250/18986	0.004	1.02627	0.0261546	0.62573	0.69456	0.656268	BRSK2	1
GO:0034599	cellular response to oxidative stress	1/74	251/18986	0.00398406	1.02218	0.0221286	0.627208	0.695569	0.657221	TET1	1
GO:0051346	negative regulation of hydrolase activity	1/74	252/18986	0.00396825	1.01813	0.0181185	0.628681	0.696569	0.658166	PAPLN	1
GO:0002790	peptide secretion	1/74	257/18986	0.00389105	0.998317	-0.00169882	0.635957	0.701767	0.663078	BRSK2	1
GO:0031669	cellular response to nutrient levels	1/74	257/18986	0.00389105	0.998317	-0.00169882	0.635957	0.701767	0.663078	PAK6	1
GO:0002703	regulation of leukocyte mediated immunity	1/74	258/18986	0.00387597	0.994448	-0.00561657	0.637396	0.701767	0.663078	TLR9	1
GO:0003341	cilium movement	1/74	258/18986	0.00387597	0.994448	-0.00561657	0.637396	0.701767	0.663078	EFHB	1
GO:0033044	regulation of chromosome organization	1/74	258/18986	0.00387597	0.994448	-0.00561657	0.637396	0.701767	0.663078	DPF3	1
GO:0033674	positive regulation of kinase activity	1/74	258/18986	0.00387597	0.994448	-0.00561657	0.637396	0.701767	0.663078	GPRC5B	1
GO:0099003	vesicle-mediated transport in synapse	1/74	258/18986	0.00387597	0.994448	-0.00561657	0.637396	0.701767	0.663078	BRSK2	1
GO:0046883	regulation of hormone secretion	1/74	261/18986	0.00383142	0.983018	-0.0172808	0.641677	0.705845	0.66693	BRSK2	1
GO:0001906	cell killing	1/74	264/18986	0.00378788	0.971847	-0.0288141	0.645909	0.70986	0.670724	GSDMB	1
GO:0042593	glucose homeostasis	1/74	265/18986	0.00377358	0.96818	-0.0326301	0.647308	0.710759	0.671573	BRSK2	1
GO:0033500	carbohydrate homeostasis	1/74	266/18986	0.0037594	0.96454	-0.0364319	0.648703	0.711649	0.672415	BRSK2	1
GO:0032886	regulation of microtubule-based process	1/74	269/18986	0.00371747	0.953783	-0.0477545	0.652852	0.714917	0.675503	INPP5J	1
GO:0071216	cellular response to biotic stimulus	1/74	269/18986	0.00371747	0.953783	-0.0477545	0.652852	0.714917	0.675503	TLR9	1
GO:0015833	peptide transport	1/74	270/18986	0.0037037	0.95025	-0.0515014	0.654225	0.715778	0.676316	BRSK2	1
GO:0050708	regulation of protein secretion	1/74	272/18986	0.00367647	0.943263	-0.0589548	0.656954	0.71812	0.678529	BRSK2	1
GO:0043488	regulation of mRNA stability	1/74	273/18986	0.003663	0.939808	-0.0626616	0.65831	0.71896	0.679322	GDNF	1
GO:0003007	heart morphogenesis	1/74	274/18986	0.00364964	0.936378	-0.0663552	0.659661	0.719149	0.679501	KCNJ8	1
GO:0007188	adenylate cyclase-modulating G protein-coupled receptor signaling pathway	1/74	274/18986	0.00364964	0.936378	-0.0663552	0.659661	0.719149	0.679501	HTR1D	1
GO:0006898	receptor-mediated endocytosis	1/74	275/18986	0.00363636	0.932973	-0.0700358	0.661007	0.719332	0.679674	CACNG8	1
GO:0051259	protein complex oligomerization	1/74	275/18986	0.00363636	0.932973	-0.0700358	0.661007	0.719332	0.679674	KCNJ12	1
GO:0060828	regulation of canonical Wnt signaling pathway	1/74	276/18986	0.00362319	0.929593	-0.0737035	0.662348	0.720149	0.680446	GPRC5B	1
GO:0140014	mitotic nuclear division	1/74	282/18986	0.0035461	0.909814	-0.095444	0.670283	0.728128	0.687985	KIFC1	1
GO:0042113	B cell activation	1/74	284/18986	0.00352113	0.903407	-0.102592	0.672887	0.730307	0.690044	TLR9	1
GO:0043487	regulation of RNA stability	1/74	285/18986	0.00350877	0.900237	-0.106148	0.674181	0.731061	0.690757	GDNF	1
GO:0061013	regulation of mRNA catabolic process	1/74	289/18986	0.00346021	0.887777	-0.120253	0.679308	0.735967	0.695392	GDNF	1
GO:0015850	organic hydroxy compound transport	1/74	292/18986	0.00342466	0.878656	-0.130711	0.683101	0.739421	0.698655	GDNF	1
GO:0051258	protein polymerization	1/74	293/18986	0.00341297	0.875657	-0.134174	0.684355	0.740122	0.699318	INPP5J	1
GO:0016197	endosomal transport	1/74	294/18986	0.00340136	0.872679	-0.137626	0.685605	0.740197	0.699389	EHD2	1
GO:0040029	epigenetic regulation of gene expression	1/74	295/18986	0.00338983	0.869721	-0.141066	0.68685	0.740197	0.699389	TET1	1
GO:0051054	positive regulation of DNA metabolic process	1/74	295/18986	0.00338983	0.869721	-0.141066	0.68685	0.740197	0.699389	DPF3	1
GO:0051321	meiotic cell cycle	1/74	295/18986	0.00338983	0.869721	-0.141066	0.68685	0.740197	0.699389	RNF212	1
GO:1903532	positive regulation of secretion by cell	1/74	298/18986	0.0033557	0.860965	-0.151322	0.690555	0.743534	0.702541	GDNF	1
GO:0051056	regulation of small GTPase mediated signal transduction	1/74	300/18986	0.00333333	0.855225	-0.158106	0.693	0.74551	0.704409	ARHGEF19	1
GO:0045861	negative regulation of proteolysis	1/74	303/18986	0.00330033	0.846758	-0.168201	0.696634	0.748758	0.707478	PAPLN	1
GO:0051347	positive regulation of transferase activity	1/74	304/18986	0.00328947	0.843972	-0.171546	0.697835	0.74939	0.708075	GPRC5B	1
GO:0001666	response to hypoxia	1/74	317/18986	0.00315457	0.809361	-0.214108	0.713035	0.76504	0.722862	KCNJ8	1
GO:0046879	hormone secretion	1/74	319/18986	0.0031348	0.804287	-0.220511	0.715305	0.766802	0.724527	BRSK2	1
GO:0062197	cellular response to chemical stress	1/74	321/18986	0.00311526	0.799276	-0.226877	0.717558	0.768543	0.726172	TET1	1
GO:0051047	positive regulation of secretion	1/74	322/18986	0.00310559	0.796794	-0.230046	0.718678	0.769067	0.726667	GDNF	1
GO:0006302	double-strand break repair	1/74	323/18986	0.00309598	0.794327	-0.233206	0.719793	0.769586	0.727158	DPF3	1
GO:0009416	response to light stimulus	1/74	326/18986	0.00306748	0.787017	-0.242633	0.723113	0.771785	0.729235	RGS14	1
GO:0090092	regulation of transmembrane receptor protein serine/threonine kinase signaling pathway	1/74	326/18986	0.00306748	0.787017	-0.242633	0.723113	0.771785	0.729235	TET1	1
GO:0097193	intrinsic apoptotic signaling pathway	1/74	327/18986	0.0030581	0.78461	-0.245758	0.724212	0.772281	0.729704	BRSK2	1
GO:0042886	amide transport	1/74	328/18986	0.00304878	0.782218	-0.248873	0.725305	0.772773	0.730169	BRSK2	1
GO:0009914	hormone transport	1/74	330/18986	0.0030303	0.777477	-0.255079	0.72748	0.774414	0.731719	BRSK2	1
GO:0036293	response to decreased oxygen levels	1/74	331/18986	0.00302115	0.775129	-0.258168	0.728561	0.774889	0.732168	KCNJ8	1
GO:0060070	canonical Wnt signaling pathway	1/74	332/18986	0.00301205	0.772794	-0.26125	0.729638	0.775359	0.732612	GPRC5B	1
GO:0022409	positive regulation of cell-cell adhesion	1/74	336/18986	0.00297619	0.763594	-0.27349	0.733903	0.778536	0.735614	GCNT2	1
GO:0051251	positive regulation of lymphocyte activation	1/74	336/18986	0.00297619	0.763594	-0.27349	0.733903	0.778536	0.735614	TLR9	1
GO:0030198	extracellular matrix organization	1/74	339/18986	0.00294985	0.756836	-0.282583	0.737058	0.779603	0.736623	PAPLN	1
GO:0048872	homeostasis of number of cells	1/74	339/18986	0.00294985	0.756836	-0.282583	0.737058	0.779603	0.736623	GPRASP2	1
GO:0006913	nucleocytoplasmic transport	1/74	340/18986	0.00294118	0.75461	-0.285598	0.738101	0.779603	0.736623	RGS14	1
GO:0043062	extracellular structure organization	1/74	340/18986	0.00294118	0.75461	-0.285598	0.738101	0.779603	0.736623	PAPLN	1
GO:0051169	nuclear transport	1/74	340/18986	0.00294118	0.75461	-0.285598	0.738101	0.779603	0.736623	RGS14	1
GO:0045229	external encapsulating structure organization	1/74	341/18986	0.00293255	0.752398	-0.288605	0.739141	0.780027	0.737022	PAPLN	1
GO:0010038	response to metal ion	1/74	345/18986	0.00289855	0.743674	-0.300552	0.743258	0.783694	0.740488	TLR9	1
GO:0030111	regulation of Wnt signaling pathway	1/74	349/18986	0.00286533	0.735151	-0.312375	0.747311	0.787287	0.743883	GPRC5B	1
GO:0016042	lipid catabolic process	1/74	351/18986	0.002849	0.730962	-0.31824	0.749313	0.788405	0.744939	PLCD1	1
GO:0006310	DNA recombination	1/74	352/18986	0.00284091	0.728885	-0.321162	0.750309	0.788405	0.744939	RNF212	1
GO:0032956	regulation of actin cytoskeleton organization	1/74	352/18986	0.00284091	0.728885	-0.321162	0.750309	0.788405	0.744939	ARHGEF19	1
GO:0042063	gliogenesis	1/74	355/18986	0.0028169	0.722726	-0.329882	0.753272	0.790838	0.747238	GJC2	1
GO:0006402	mRNA catabolic process	1/74	356/18986	0.00280899	0.720695	-0.332774	0.754252	0.791187	0.747567	GDNF	1
GO:0070482	response to oxygen levels	1/74	358/18986	0.0027933	0.716669	-0.338536	0.7562	0.79255	0.748855	KCNJ8	1
GO:0006887	exocytosis	1/74	360/18986	0.00277778	0.712688	-0.344269	0.758133	0.792861	0.749149	BRSK2	1
GO:0045765	regulation of angiogenesis	1/74	360/18986	0.00277778	0.712688	-0.344269	0.758133	0.792861	0.749149	ECSCR	1
GO:0031589	cell-substrate adhesion	1/74	361/18986	0.00277008	0.710713	-0.347125	0.759094	0.792861	0.749149	GCNT2	1
GO:0032535	regulation of cellular component size	1/74	361/18986	0.00277008	0.710713	-0.347125	0.759094	0.792861	0.749149	GPRC5B	1
GO:0006066	alcohol metabolic process	1/74	363/18986	0.00275482	0.706798	-0.352816	0.761005	0.794177	0.750393	INPP5J	1
GO:0009895	negative regulation of catabolic process	1/74	367/18986	0.0027248	0.699094	-0.364114	0.764781	0.797436	0.753472	GDNF	1
GO:0007517	muscle organ development	1/74	369/18986	0.00271003	0.695305	-0.369723	0.766647	0.798019	0.754023	DPF3	1
GO:1901342	regulation of vasculature development	1/74	369/18986	0.00271003	0.695305	-0.369723	0.766647	0.798019	0.754023	ECSCR	1
GO:0002696	positive regulation of leukocyte activation	1/74	371/18986	0.00269542	0.691557	-0.375304	0.768499	0.798585	0.754557	TLR9	1
GO:0010639	negative regulation of organelle organization	1/74	371/18986	0.00269542	0.691557	-0.375304	0.768499	0.798585	0.754557	INPP5J	1
GO:0016236	macroautophagy	1/74	372/18986	0.00268817	0.689698	-0.378085	0.769419	0.798861	0.754819	RAB43	1
GO:0010506	regulation of autophagy	1/74	373/18986	0.00268097	0.687849	-0.380859	0.770336	0.799133	0.755076	TLR9	1
GO:0044282	small molecule catabolic process	1/74	375/18986	0.00266667	0.68418	-0.386387	0.772158	0.800344	0.75622	FUT2	1
GO:0050878	regulation of body fluid levels	1/74	381/18986	0.00262467	0.673406	-0.402818	0.777541	0.804557	0.760201	TSPAN32	1
GO:0090287	regulation of cellular response to growth factor stimulus	1/74	381/18986	0.00262467	0.673406	-0.402818	0.777541	0.804557	0.760201	TET1	1
GO:0030336	negative regulation of cell migration	1/74	383/18986	0.00261097	0.669889	-0.408244	0.779307	0.805702	0.761282	TET1	1
GO:0002449	lymphocyte mediated immunity	1/74	386/18986	0.00259067	0.664683	-0.416337	0.78193	0.80773	0.763199	IRF7	1
GO:0001818	negative regulation of cytokine production	1/74	388/18986	0.00257732	0.661257	-0.421702	0.783662	0.808835	0.764242	TRIB2	1
GO:0050867	positive regulation of cell activation	1/74	391/18986	0.00255754	0.656183	-0.429705	0.786234	0.810502	0.765817	TLR9	1
GO:1903037	regulation of leukocyte cell-cell adhesion	1/74	392/18986	0.00255102	0.654509	-0.43236	0.787085	0.810502	0.765817	TSPAN32	1
GO:0008544	epidermis development	1/74	393/18986	0.00254453	0.652844	-0.43501	0.787932	0.810502	0.765817	NTF4	1
GO:0050863	regulation of T cell activation	1/74	393/18986	0.00254453	0.652844	-0.43501	0.787932	0.810502	0.765817	TSPAN32	1
GO:0060271	cilium assembly	1/74	398/18986	0.00251256	0.644642	-0.448171	0.79212	0.813438	0.768592	EHD2	1
GO:2000146	negative regulation of cell motility	1/74	398/18986	0.00251256	0.644642	-0.448171	0.79212	0.813438	0.768592	TET1	1
GO:0002460	adaptive immune response based on somatic recombination of immune receptors built from immunoglobulin superfamily domains	1/74	400/18986	0.0025	0.641419	-0.453395	0.793772	0.813766	0.768902	IRF7	1
GO:1902903	regulation of supramolecular fiber organization	1/74	400/18986	0.0025	0.641419	-0.453395	0.793772	0.813766	0.768902	INPP5J	1
GO:0006631	fatty acid metabolic process	1/74	405/18986	0.00246914	0.6335	-0.466358	0.797845	0.81671	0.771683	SCD5	1
GO:0050678	regulation of epithelial cell proliferation	1/74	406/18986	0.00246305	0.63194	-0.468934	0.79865	0.81671	0.771683	FUT2	1
GO:1903311	regulation of mRNA metabolic process	1/74	406/18986	0.00246305	0.63194	-0.468934	0.79865	0.81671	0.771683	GDNF	1
GO:0006401	RNA catabolic process	1/74	412/18986	0.00242718	0.622737	-0.484276	0.803415	0.820895	0.775637	GDNF	1
GO:0040013	negative regulation of locomotion	1/74	416/18986	0.00240385	0.616749	-0.494398	0.806529	0.823388	0.777993	TET1	1
GO:0140694	non-membrane-bounded organelle assembly	1/74	425/18986	0.00235294	0.603688	-0.516872	0.81336	0.829105	0.783395	KIFC1	1
GO:0030098	lymphocyte differentiation	1/74	426/18986	0.00234742	0.602271	-0.519344	0.814104	0.829105	0.783395	TLR9	1
GO:0022412	cellular process involved in reproduction in multicellular organism	1/74	427/18986	0.00234192	0.600861	-0.521811	0.814845	0.829105	0.783395	GLIPR1L1	1
GO:0044782	cilium organization	1/74	427/18986	0.00234192	0.600861	-0.521811	0.814845	0.829105	0.783395	EHD2	1
GO:0007159	leukocyte cell-cell adhesion	1/74	430/18986	0.00232558	0.596669	-0.529184	0.817051	0.830657	0.784862	TSPAN32	1
GO:0050911	detection of chemical stimulus involved in sensory perception of smell	1/74	431/18986	0.00232019	0.595284	-0.531631	0.817781	0.830707	0.784909	OR1J2	1
GO:0043254	regulation of protein-containing complex assembly	1/74	433/18986	0.00230947	0.592535	-0.536512	0.819231	0.831489	0.785648	INPP5J	1
GO:0141188	nucleic acid catabolic process	1/74	441/18986	0.00226757	0.581786	-0.555849	0.82492	0.836568	0.790447	GDNF	1
GO:0009314	response to radiation	1/74	442/18986	0.00226244	0.58047	-0.558246	0.825619	0.836582	0.790459	RGS14	1
GO:0051223	regulation of protein transport	1/74	446/18986	0.00224215	0.575264	-0.567786	0.828386	0.838689	0.792451	BRSK2	1
GO:0009410	response to xenobiotic stimulus	1/74	451/18986	0.00221729	0.568886	-0.579611	0.831784	0.841414	0.795026	KCNJ8	1
GO:0007005	mitochondrion organization	1/74	452/18986	0.00221239	0.567627	-0.581963	0.832456	0.841414	0.795026	TNFSF10	1
GO:0048568	embryonic organ development	1/74	458/18986	0.00218341	0.560191	-0.595984	0.83643	0.844693	0.798124	GDNF	1
GO:0007608	sensory perception of smell	1/74	459/18986	0.00217865	0.558971	-0.598306	0.837083	0.844693	0.798124	OR1J2	1
GO:0072594	establishment of protein localization to organelle	1/74	462/18986	0.0021645	0.555341	-0.605248	0.839028	0.845956	0.799317	CACNG8	1
GO:0007015	actin filament organization	1/74	465/18986	0.00215054	0.551758	-0.612152	0.840949	0.847194	0.800487	AQP5-AS1	1
GO:0051051	negative regulation of transport	1/74	467/18986	0.00214133	0.549395	-0.616734	0.842218	0.847772	0.801033	TLR9	1
GO:0031329	regulation of cellular catabolic process	1/74	472/18986	0.00211864	0.543575	-0.62812	0.845345	0.84952	0.802685	TLR9	1
GO:0043603	amide metabolic process	1/74	472/18986	0.00211864	0.543575	-0.62812	0.845345	0.84952	0.802685	NAGS	1
GO:0050907	detection of chemical stimulus involved in sensory perception	1/74	479/18986	0.00208768	0.535632	-0.643895	0.849622	0.853115	0.806081	OR1J2	1
GO:0050673	epithelial cell proliferation	1/74	482/18986	0.00207469	0.532298	-0.650598	0.851418	0.854217	0.807122	FUT2	1
GO:0051656	establishment of organelle localization	1/74	488/18986	0.00204918	0.525753	-0.663903	0.854949	0.857054	0.809804	KIFC1	1
GO:0016049	cell growth	1/74	490/18986	0.00204082	0.523607	-0.668308	0.856107	0.857385	0.810116	PAK6	1
GO:0007264	small GTPase-mediated signal transduction	1/74	491/18986	0.00203666	0.522541	-0.670505	0.856683	0.857385	0.810116	ARHGEF19	1
GO:0045785	positive regulation of cell adhesion	1/74	499/18986	0.00200401	0.514163	-0.687954	0.861207	0.861207	0.813727	GCNT2	1
