# Supplementary material for: A novel ARMC5-containing ubiquitin ligase controls the degradation of HSPA1A and its client protein estrogen receptor alpha
Source: Research Square preprint supplement (doi:10.21203/rs.3.rs-8810312/v1), 2026-02-22
Supplement: Supplementary file 8 [file d40e3c29e9f1b230f91cd0e1.docx]

***Supplementary Table 1 (S-Table 1). List of antibodies used in this study***

| Antibody | Company | Clone | Cat. # |
| --- | --- | --- | --- |
| FLAG | CST | 9A3 | 8146 |
| HSP70A1A | Enzo | C92F3A-5 | ADI-SPA-910-F |
| ERα | CST | D6R2W | 13258s |
| HA | Sigma | HA-7 | H3663 |
| V5 | NOVUS | 1071 | NBP2-43626 |
| β-actin | CST |  | 4967L |
| α-actinin | CST | D6F6 | 6487S |
| Ubiquitin | Santa Cruz | F-11 | Sc-271289 |
